# Supplementary material
Source: PubMed Central journal article supplement (PMC7415348)
Supplement: NIHMS1610503-supplement-Supplementary_Table_1.pdf [file NIHMS1610503-supplement-Supplementary_Table_1.pdf]

**Supplementary Table 1. Cell lines, cell line-derived xenografts, and patient-derived xenografts used in the study**

| <b>Sample types</b>         | <b>Sample Names</b> | <b>Sources</b> | <b>Fusion status</b> | <b>Injection sites</b> |
|-----------------------------|---------------------|----------------|----------------------|------------------------|
| Cell line                   | MP4                 | Dr. T Cripe    | PAX3-FOXO1           |                        |
| Cell line                   | RH5                 | Dr. J Khan     | PAX3-FOXO1           |                        |
| Cell line                   | RH10                | Dr. P Houghton | PAX3-FOXO1           |                        |
| Cell line                   | RH28                | Dr. B Emanuel  | PAX3-FOXO1           |                        |
| Cell line                   | RH30                | ATCC           | PAX3-FOXO1           |                        |
| Cell line                   | RH41                | Dr. C Linardic | PAX3-FOXO1           |                        |
| Cell line                   | RD                  | Dr. L Helman   | Fusion-negative      |                        |
| Cell line                   | RH6*                | Dr. P houghton | Fusion-negative      |                        |
| Cell line                   | RH18                | Dr. M Tsokos   | Fusion-negative      |                        |
| Cell line                   | RH36*               | Dr. P Houghton | Fusion-negative      |                        |
| Cell line                   | SMS-CTR             | Dr. C Linardic | Fusion-negative      |                        |
| Cell line-derived xenograft | RH28 SubC           | Dr. C Linardic | PAX3-FOXO1           | Subcutaneous           |
| Cell line-derived xenograft | RH28 IntraM         | Dr. F Barr     | PAX3-FOXO1           | Intramuscular          |
| Cell line-derived xenograft | RH30 SubC           | Dr. C Linardic | PAX3-FOXO1           | Subcutaneous           |
| Cell line-derived xenograft | RH30 IntraM         | Dr. F Barr     | PAX3-FOXO1           | Intramuscular          |
| Cell line-derived xenograft | RH41 IntraM         | Dr. L Helman   | PAX3-FOXO1           | Intramuscular          |
| Cell line-derived xenograft | RH41 IntraM         | Dr. F Barr     | PAX3-FOXO1           | Intramuscular          |
| Cell line-derived xenograft | RH18 IntraM         | Dr. L Helman   | Fusion-negative      | Intramuscular          |
| Cell line-derived xenograft | RD SubC             | Dr. C Linardic | Fusion-negative      | Subcutaneous           |
| Cell line-derived xenograft | RD IntraM           | Dr. F Barr     | Fusion-negative      | Intramuscular          |
| Cell line-derived xenograft | SMS-CTR IntraM      | Dr. F Barr     | Fusion-negative      | Intramuscular          |
| Cell line-derived xenograft | RH36 IntraM         | Dr. L Helman   | Fusion-negative      | Intramuscular          |
| Patient-derived xenograft   | RH10 PDX**          | Dr. P Houghton | PAX3-FOXO1           | Subcutaneous           |
| Patient-derived xenograft   | RH28 PDX**          | Dr. P Houghton | PAX3-FOXO1           | Subcutaneous           |
| Patient-derived xenograft   | RH30 PDX**          | Dr. P Houghton | PAX3-FOXO1           | Subcutaneous           |

**Supplementary Table 1. (continued)**

| <b>Sample types</b>       | <b>Sample Names</b> | <b>Sources</b>        | <b>Fusion status</b> | <b>Injection sites</b> |
|---------------------------|---------------------|-----------------------|----------------------|------------------------|
| Patient-derived xenograft | RH41 PDX**          | Dr. P Houghton        | PAX3-FOXO1           | Subcutaneous           |
| Patient-derived xenograft | RH18 PDX**          | Dr. P Houghton        | Fusion-negative      | Subcutaneous           |
| Patient-derived xenograft | RH36 PDX**          | Dr. P Houghton        | Fusion-negative      | Subcutaneous           |
| Patient-derived xenograft | SJRHB010468_X1      | St. Jude              | PAX7-FOXO1           | Intramuscular          |
| Patient-derived xenograft | SJRHB010927_X1      | St. Jude              | Fusion-negative      | Intramuscular          |
| Patient-derived xenograft | SJRHB011_Y          | St. Jude              | Fusion-negative      | Intramuscular          |
| Patient-derived xenograft | SJRHB013757_X2      | St. Jude              | PAX7-FOXO1           | Intramuscular          |
| Patient-derived xenograft | SJRHB013758_X1      | St. Jude              | Fusion-negative      | Intramuscular          |
| Patient-derived xenograft | CTG1008             | Champions<br>Oncology | PAX3-FOXO1           | Subcutaneous           |
| Patient-derived xenograft | CTG1213             | Champions<br>Oncology | Fusion-negative      | Subcutaneous           |
| Patient-derived xenograft | CTG1409             | Champions<br>Oncology | PAX3-FOXO1           | Subcutaneous           |

Footnote: \*derived from the same patient material; \*\*derived from the same patient material in which corresponding cell line or cell line-derived xenografts were generated.
