# Supplementary material
Source: PubMed Central journal article supplement (PMC7415348)
Supplement: NIHMS1610503-supplement-Supplementary_Table_2.pdf [file NIHMS1610503-supplement-Supplementary_Table_2.pdf]

**Supplementary Table 2. Associations between fusion status or *RAS* mutation status and DNA methylation subsets in RMS discovery and validation cohorts**

| Cohort            | Fusion-positive Cluster |                                |                                |         | Fusion-negative Cluster |                                |                                |         |
|-------------------|-------------------------|--------------------------------|--------------------------------|---------|-------------------------|--------------------------------|--------------------------------|---------|
|                   | Fusion                  | FP-1<br>(No./ total<br>No., %) | FP-2<br>(No./ total<br>No., %) | P Value | Mutations               | FN-1<br>(No./ total<br>No., %) | FN-2<br>(No./ total<br>No., %) | P Value |
| <b>Discovery</b>  |                         |                                |                                |         |                         |                                |                                |         |
|                   | <i>PAX3-FOXO1</i>       | 4/12 (33%)                     | 8/9 (89%)                      | 0.024   | <i>RAS</i> family       | 0/5 (0%)                       | 7/12 (58%)                     | 0.044   |
|                   | <i>PAX7-FOXO1</i>       | 8/12 (67%)                     | 1/9 (11%)                      | 0.024   |                         |                                |                                |         |
| <b>Validation</b> |                         |                                |                                |         |                         |                                |                                |         |
|                   | <i>PAX3-FOXO1</i>       | 0/7 (0%)                       | 14/16 (88%)                    | <0.001  | <i>RAS</i> family       | 2/12 (17%)                     | 8/13 (62%)                     | 0.041   |
|                   | <i>PAX7-FOXO1</i>       | 4/7 (57%)                      | 1/16 (6%)                      | 0.017   |                         |                                |                                |         |
