# Supplementary material
Source: PubMed Central journal article supplement (PMC7415348)
Supplement: NIHMS1610503-supplement-Supplementary_Table_3.pdf [file NIHMS1610503-supplement-Supplementary_Table_3.pdf]

**Supplementary Table 3. Differentially methylated probes in PAX3–FOXO1 versus PAX7–FOXO1 tumors**

| Probe      | P3F.mean | P7F.mean | Mean.diff | Adjusted.P.value | Promoter.related.gene | Category                          |
|------------|----------|----------|-----------|------------------|-----------------------|-----------------------------------|
| cg07815799 | 0.711    | 0.184    | 0.528     | 0                | ARHGEF4               | Hypermethylated in P3F versus P7F |
| cg00028678 | 0.709    | 0.176    | 0.533     | 0                | ARHGEF4               | Hypermethylated in P3F versus P7F |
| cg00401745 | 0.683    | 0.198    | 0.485     | 0                | ARHGEF4               | Hypermethylated in P3F versus P7F |
| cg11469778 | 0.689    | 0.260    | 0.429     | 0                | ARHGEF4               | Hypermethylated in P3F versus P7F |
| cg06834427 | 0.794    | 0.367    | 0.427     | 0                | NA                    | Hypermethylated in P3F versus P7F |
| cg12910906 | 0.630    | 0.223    | 0.406     | 0                | ARHGEF4               | Hypermethylated in P3F versus P7F |
| cg11251215 | 0.807    | 0.505    | 0.302     | 0                | NA                    | Hypermethylated in P3F versus P7F |
| cg26218698 | 0.471    | 0.145    | 0.326     | 0                | NA                    | Hypermethylated in P3F versus P7F |
| cg25007705 | 0.652    | 0.382    | 0.270     | 0                | NA                    | Hypermethylated in P3F versus P7F |
| cg13602816 | 0.660    | 0.272    | 0.388     | 0                | ARHGEF4               | Hypermethylated in P3F versus P7F |
| cg02785604 | 0.737    | 0.388    | 0.350     | 0                | NA                    | Hypermethylated in P3F versus P7F |
| cg07919128 | 0.709    | 0.367    | 0.342     | 0                | NA                    | Hypermethylated in P3F versus P7F |
| cg01182863 | 0.858    | 0.527    | 0.331     | 0                | NA                    | Hypermethylated in P3F versus P7F |
| cg06204745 | 0.685    | 0.185    | 0.500     | 0                | NA                    | Hypermethylated in P3F versus P7F |
| cg05358723 | 0.683    | 0.336    | 0.346     | 0                | NA                    | Hypermethylated in P3F versus P7F |
| cg13676583 | 0.695    | 0.367    | 0.327     | 0                | DOK3                  | Hypermethylated in P3F versus P7F |
| cg09899564 | 0.846    | 0.529    | 0.317     | 0                | NA                    | Hypermethylated in P3F versus P7F |
| cg16587616 | 0.460    | 0.134    | 0.326     | 0                | KHDRBS2               | Hypermethylated in P3F versus P7F |
| cg14446494 | 0.799    | 0.540    | 0.260     | 0                | ARHGEF4               | Hypermethylated in P3F versus P7F |
| cg01696226 | 0.645    | 0.171    | 0.475     | 0                | NA                    | Hypermethylated in P3F versus P7F |
| cg23841608 | 0.520    | 0.233    | 0.287     | 0                | NA                    | Hypermethylated in P3F versus P7F |
| cg11750962 | 0.753    | 0.399    | 0.353     | 0                | NA                    | Hypermethylated in P3F versus P7F |
| cg25726128 | 0.792    | 0.446    | 0.346     | 0                | NA                    | Hypermethylated in P3F versus P7F |
| cg23715104 | 0.782    | 0.476    | 0.306     | 0                | SLC13A4               | Hypermethylated in P3F versus P7F |
| cg06172859 | 0.813    | 0.534    | 0.280     | 0                | NA                    | Hypermethylated in P3F versus P7F |

### Supplementary Table 3 (continued)

| Probe      | P3F.mean | P7F.mean | Mean.diff | Adjusted.P.value | Promoter.related.gene | Category                          |
|------------|----------|----------|-----------|------------------|-----------------------|-----------------------------------|
| cg07420163 | 0.553    | 0.151    | 0.402     | 0                | NA                    | Hypermethylated in P3F versus P7F |
| cg25416479 | 0.771    | 0.455    | 0.317     | 0                | NA                    | Hypermethylated in P3F versus P7F |
| cg21620107 | 0.723    | 0.297    | 0.426     | 0                | NA                    | Hypermethylated in P3F versus P7F |
| cg20812772 | 0.820    | 0.482    | 0.338     | 0                | NA                    | Hypermethylated in P3F versus P7F |
| cg09187505 | 0.733    | 0.270    | 0.463     | 0                | NA                    | Hypermethylated in P3F versus P7F |
| cg10151367 | 0.522    | 0.233    | 0.289     | 0                | NA                    | Hypermethylated in P3F versus P7F |
| cg19682134 | 0.575    | 0.254    | 0.321     | 0                | NA                    | Hypermethylated in P3F versus P7F |
| cg13554818 | 0.657    | 0.254    | 0.404     | 0                | NA                    | Hypermethylated in P3F versus P7F |
| cg02902915 | 0.736    | 0.439    | 0.297     | 0                | NA                    | Hypermethylated in P3F versus P7F |
| cg01048445 | 0.709    | 0.320    | 0.389     | 0                | NA                    | Hypermethylated in P3F versus P7F |
| cg23657707 | 0.852    | 0.481    | 0.370     | 0                | NA                    | Hypermethylated in P3F versus P7F |
| cg01978246 | 0.788    | 0.461    | 0.327     | 0                | NA                    | Hypermethylated in P3F versus P7F |
| cg12290671 | 0.784    | 0.526    | 0.259     | 0                | NA                    | Hypermethylated in P3F versus P7F |
| cg03613433 | 0.628    | 0.270    | 0.357     | 0                | NA                    | Hypermethylated in P3F versus P7F |
| cg17382310 | 0.824    | 0.542    | 0.282     | 0                | SLC13A4               | Hypermethylated in P3F versus P7F |
| cg26053881 | 0.715    | 0.370    | 0.346     | 0                | NA                    | Hypermethylated in P3F versus P7F |
| cg24035595 | 0.867    | 0.586    | 0.281     | 0                | NA                    | Hypermethylated in P3F versus P7F |
| cg07091593 | 0.558    | 0.087    | 0.471     | 0                | BCL6                  | Hypermethylated in P3F versus P7F |
| cg11673291 | 0.603    | 0.224    | 0.379     | 0                | NA                    | Hypermethylated in P3F versus P7F |
| cg10406526 | 0.703    | 0.244    | 0.459     | 0                | NA                    | Hypermethylated in P3F versus P7F |
| cg00874873 | 0.795    | 0.504    | 0.291     | 0                | NA                    | Hypermethylated in P3F versus P7F |
| cg26264896 | 0.688    | 0.372    | 0.316     | 0                | NA                    | Hypermethylated in P3F versus P7F |
| cg17407455 | 0.803    | 0.496    | 0.307     | 0                | NA                    | Hypermethylated in P3F versus P7F |
| cg24373865 | 0.698    | 0.337    | 0.361     | 0                | NA                    | Hypermethylated in P3F versus P7F |
| cg01587682 | 0.746    | 0.351    | 0.395     | 0                | NA                    | Hypermethylated in P3F versus P7F |

### Supplementary Table 3 (continued)

| Probe      | P3F.mean | P7F.mean | Mean.diff | Adjusted.P.value | Promoter.related.gene | Category                          |
|------------|----------|----------|-----------|------------------|-----------------------|-----------------------------------|
| cg14973055 | 0.707    | 0.444    | 0.263     | 0.000            | NA                    | Hypermethylated in P3F versus P7F |
| cg08332071 | 0.779    | 0.433    | 0.345     | 0.000            | JAM3                  | Hypermethylated in P3F versus P7F |
| cg24089935 | 0.365    | 0.060    | 0.306     | 0.000            | NA                    | Hypermethylated in P3F versus P7F |
| cg27239280 | 0.612    | 0.314    | 0.298     | 0.000            | CTF1                  | Hypermethylated in P3F versus P7F |
| cg12942328 | 0.496    | 0.080    | 0.417     | 0.001            | BCL6                  | Hypermethylated in P3F versus P7F |
| cg26349416 | 0.824    | 0.562    | 0.263     | 0.001            | NA                    | Hypermethylated in P3F versus P7F |
| cg15366555 | 0.715    | 0.455    | 0.260     | 0.001            | DCTN1                 | Hypermethylated in P3F versus P7F |
| cg26464882 | 0.831    | 0.568    | 0.263     | 0.001            | NA                    | Hypermethylated in P3F versus P7F |
| cg08890418 | 0.629    | 0.203    | 0.426     | 0.001            | KIF17                 | Hypermethylated in P3F versus P7F |
| cg20342105 | 0.764    | 0.478    | 0.286     | 0.001            | GNG3_BSCL2            | Hypermethylated in P3F versus P7F |
| cg03642503 | 0.775    | 0.501    | 0.274     | 0.001            | NA                    | Hypermethylated in P3F versus P7F |
| cg26913669 | 0.729    | 0.444    | 0.286     | 0.001            | COL11A1               | Hypermethylated in P3F versus P7F |
| cg26707709 | 0.476    | 0.183    | 0.293     | 0.001            | NA                    | Hypermethylated in P3F versus P7F |
| cg11452571 | 0.492    | 0.046    | 0.446     | 0.001            | NA                    | Hypermethylated in P3F versus P7F |
| cg08302650 | 0.828    | 0.467    | 0.361     | 0.001            | NA                    | Hypermethylated in P3F versus P7F |
| cg00558702 | 0.526    | 0.216    | 0.311     | 0.001            | NA                    | Hypermethylated in P3F versus P7F |
| cg11264539 | 0.761    | 0.499    | 0.262     | 0.001            | BSCL2_GNG3            | Hypermethylated in P3F versus P7F |
| cg09180564 | 0.491    | 0.157    | 0.333     | 0.001            | NA                    | Hypermethylated in P3F versus P7F |
| cg01158415 | 0.729    | 0.457    | 0.272     | 0.001            | NA                    | Hypermethylated in P3F versus P7F |
| cg14669274 | 0.613    | 0.179    | 0.434     | 0.001            | NA                    | Hypermethylated in P3F versus P7F |
| cg07405330 | 0.694    | 0.382    | 0.312     | 0.001            | NA                    | Hypermethylated in P3F versus P7F |
| cg24274117 | 0.645    | 0.178    | 0.467     | 0.001            | NA                    | Hypermethylated in P3F versus P7F |
| cg13483916 | 0.496    | 0.073    | 0.423     | 0.001            | NA                    | Hypermethylated in P3F versus P7F |
| cg20707679 | 0.481    | 0.046    | 0.435     | 0.001            | NA                    | Hypermethylated in P3F versus P7F |
| cg05264446 | 0.551    | 0.147    | 0.404     | 0.001            | NA                    | Hypermethylated in P3F versus P7F |

### Supplementary Table 3 (continued)

| Probe      | P3F.mean | P7F.mean | Mean.diff | Adjusted.P.value | Promoter.related.gene | Category                          |
|------------|----------|----------|-----------|------------------|-----------------------|-----------------------------------|
| cg20658709 | 0.678    | 0.346    | 0.333     | 0.001            | NA                    | Hypermethylated in P3F versus P7F |
| cg17633576 | 0.682    | 0.345    | 0.337     | 0.001            | NA                    | Hypermethylated in P3F versus P7F |
| cg03437164 | 0.760    | 0.450    | 0.310     | 0.001            | NA                    | Hypermethylated in P3F versus P7F |
| cg12019990 | 0.862    | 0.603    | 0.259     | 0.001            | NA                    | Hypermethylated in P3F versus P7F |
| cg22347212 | 0.572    | 0.229    | 0.342     | 0.001            | FZD10                 | Hypermethylated in P3F versus P7F |
| cg01240795 | 0.679    | 0.311    | 0.368     | 0.001            | NA                    | Hypermethylated in P3F versus P7F |
| cg23180925 | 0.707    | 0.440    | 0.267     | 0.001            | NA                    | Hypermethylated in P3F versus P7F |
| cg26209990 | 0.742    | 0.454    | 0.288     | 0.001            | NA                    | Hypermethylated in P3F versus P7F |
| cg11987780 | 0.626    | 0.359    | 0.267     | 0.001            | NA                    | Hypermethylated in P3F versus P7F |
| cg11192223 | 0.602    | 0.306    | 0.296     | 0.001            | NA                    | Hypermethylated in P3F versus P7F |
| cg26860182 | 0.587    | 0.193    | 0.394     | 0.001            | FBRSL1                | Hypermethylated in P3F versus P7F |
| cg00370303 | 0.597    | 0.155    | 0.441     | 0.001            | FBRSL1                | Hypermethylated in P3F versus P7F |
| cg10320997 | 0.713    | 0.462    | 0.251     | 0.001            | SYNPO2                | Hypermethylated in P3F versus P7F |
| cg12976582 | 0.646    | 0.319    | 0.327     | 0.001            | HYAL2                 | Hypermethylated in P3F versus P7F |
| cg13510520 | 0.777    | 0.518    | 0.259     | 0.001            | NA                    | Hypermethylated in P3F versus P7F |
| cg02002298 | 0.828    | 0.533    | 0.295     | 0.001            | NA                    | Hypermethylated in P3F versus P7F |
| cg03875156 | 0.528    | 0.159    | 0.369     | 0.001            | NA                    | Hypermethylated in P3F versus P7F |
| cg18562663 | 0.523    | 0.116    | 0.406     | 0.001            | BCL6                  | Hypermethylated in P3F versus P7F |
| cg25043279 | 0.772    | 0.501    | 0.271     | 0.001            | C7orf33               | Hypermethylated in P3F versus P7F |
| cg22390040 | 0.707    | 0.318    | 0.389     | 0.001            | NA                    | Hypermethylated in P3F versus P7F |
| cg12359697 | 0.580    | 0.122    | 0.458     | 0.001            | NA                    | Hypermethylated in P3F versus P7F |
| cg05204566 | 0.674    | 0.368    | 0.307     | 0.001            | NA                    | Hypermethylated in P3F versus P7F |
| cg18466162 | 0.759    | 0.422    | 0.337     | 0.001            | NA                    | Hypermethylated in P3F versus P7F |
| cg02634628 | 0.584    | 0.292    | 0.292     | 0.001            | NA                    | Hypermethylated in P3F versus P7F |
| cg01305186 | 0.683    | 0.283    | 0.400     | 0.001            | NA                    | Hypermethylated in P3F versus P7F |

### Supplementary Table 3 (continued)

| Probe      | P3F.mean | P7F.mean | Mean.diff | Adjusted.P.value | Promoter.related.gene | Category                          |
|------------|----------|----------|-----------|------------------|-----------------------|-----------------------------------|
| cg19399220 | 0.580    | 0.295    | 0.285     | 0.001            | NA                    | Hypermethylated in P3F versus P7F |
| cg04598774 | 0.621    | 0.297    | 0.324     | 0.001            | NA                    | Hypermethylated in P3F versus P7F |
| cg23890800 | 0.610    | 0.175    | 0.435     | 0.001            | FBRSL1                | Hypermethylated in P3F versus P7F |
| cg13899132 | 0.769    | 0.446    | 0.323     | 0.001            | NA                    | Hypermethylated in P3F versus P7F |
| cg21584710 | 0.664    | 0.400    | 0.264     | 0.001            | NA                    | Hypermethylated in P3F versus P7F |
| cg25767504 | 0.756    | 0.433    | 0.324     | 0.001            | NA                    | Hypermethylated in P3F versus P7F |
| cg26026416 | 0.521    | 0.067    | 0.455     | 0.001            | NA                    | Hypermethylated in P3F versus P7F |
| cg01446692 | 0.727    | 0.445    | 0.282     | 0.001            | CER1                  | Hypermethylated in P3F versus P7F |
| cg02148787 | 0.509    | 0.172    | 0.337     | 0.001            | TCF7                  | Hypermethylated in P3F versus P7F |
| cg16584393 | 0.531    | 0.257    | 0.274     | 0.001            | ANKRD30B              | Hypermethylated in P3F versus P7F |
| cg19809734 | 0.738    | 0.484    | 0.254     | 0.001            | NA                    | Hypermethylated in P3F versus P7F |
| cg16561155 | 0.751    | 0.474    | 0.276     | 0.001            | NA                    | Hypermethylated in P3F versus P7F |
| cg27190398 | 0.551    | 0.285    | 0.266     | 0.001            | NA                    | Hypermethylated in P3F versus P7F |
| cg08051575 | 0.554    | 0.195    | 0.359     | 0.001            | NA                    | Hypermethylated in P3F versus P7F |
| cg05842175 | 0.807    | 0.516    | 0.291     | 0.001            | NA                    | Hypermethylated in P3F versus P7F |
| cg21797718 | 0.768    | 0.461    | 0.307     | 0.001            | NA                    | Hypermethylated in P3F versus P7F |
| cg22635676 | 0.789    | 0.398    | 0.391     | 0.001            | NA                    | Hypermethylated in P3F versus P7F |
| cg08837627 | 0.403    | 0.151    | 0.252     | 0.001            | NA                    | Hypermethylated in P3F versus P7F |
| cg00941258 | 0.588    | 0.175    | 0.413     | 0.001            | NA                    | Hypermethylated in P3F versus P7F |
| cg13023210 | 0.431    | 0.150    | 0.281     | 0.001            | NA                    | Hypermethylated in P3F versus P7F |
| cg10717312 | 0.715    | 0.412    | 0.302     | 0.001            | NA                    | Hypermethylated in P3F versus P7F |
| cg19388016 | 0.530    | 0.049    | 0.482     | 0.001            | NA                    | Hypermethylated in P3F versus P7F |
| cg01835695 | 0.642    | 0.377    | 0.265     | 0.001            | MGAT1                 | Hypermethylated in P3F versus P7F |
| cg15439862 | 0.563    | 0.229    | 0.333     | 0.001            | DSC3                  | Hypermethylated in P3F versus P7F |
| cg15676707 | 0.661    | 0.352    | 0.309     | 0.001            | NA                    | Hypermethylated in P3F versus P7F |

### Supplementary Table 3 (continued)

| Probe      | P3F.mean | P7F.mean | Mean.diff | Adjusted.P.value | Promoter.related.gene | Category                          |
|------------|----------|----------|-----------|------------------|-----------------------|-----------------------------------|
| cg12147906 | 0.763    | 0.493    | 0.270     | 0.001            | NA                    | Hypermethylated in P3F versus P7F |
| cg09486406 | 0.529    | 0.166    | 0.363     | 0.001            | NA                    | Hypermethylated in P3F versus P7F |
| cg11854777 | 0.723    | 0.399    | 0.324     | 0.001            | NA                    | Hypermethylated in P3F versus P7F |
| cg20596329 | 0.328    | 0.074    | 0.254     | 0.001            | NA                    | Hypermethylated in P3F versus P7F |
| cg22975160 | 0.424    | 0.061    | 0.363     | 0.001            | NA                    | Hypermethylated in P3F versus P7F |
| cg04007726 | 0.709    | 0.361    | 0.349     | 0.001            | NA                    | Hypermethylated in P3F versus P7F |
| cg21184320 | 0.308    | 0.056    | 0.252     | 0.001            | KIF17                 | Hypermethylated in P3F versus P7F |
| cg09029193 | 0.751    | 0.494    | 0.256     | 0.001            | NA                    | Hypermethylated in P3F versus P7F |
| cg06073302 | 0.823    | 0.543    | 0.281     | 0.001            | NA                    | Hypermethylated in P3F versus P7F |
| cg11363972 | 0.503    | 0.171    | 0.332     | 0.001            | KCNQ1                 | Hypermethylated in P3F versus P7F |
| cg01427630 | 0.750    | 0.462    | 0.288     | 0.001            | NA                    | Hypermethylated in P3F versus P7F |
| cg20978721 | 0.648    | 0.264    | 0.384     | 0.001            | NA                    | Hypermethylated in P3F versus P7F |
| cg17611686 | 0.695    | 0.352    | 0.343     | 0.001            | NA                    | Hypermethylated in P3F versus P7F |
| cg26670674 | 0.702    | 0.369    | 0.333     | 0.001            | NA                    | Hypermethylated in P3F versus P7F |
| cg20580578 | 0.808    | 0.449    | 0.358     | 0.001            | NA                    | Hypermethylated in P3F versus P7F |
| cg26307117 | 0.523    | 0.158    | 0.365     | 0.001            | LTF                   | Hypermethylated in P3F versus P7F |
| cg25045113 | 0.650    | 0.313    | 0.337     | 0.001            | MFSD6L                | Hypermethylated in P3F versus P7F |
| cg12467933 | 0.613    | 0.239    | 0.374     | 0.001            | NA                    | Hypermethylated in P3F versus P7F |
| cg16704797 | 0.825    | 0.570    | 0.255     | 0.001            | NA                    | Hypermethylated in P3F versus P7F |
| cg02370232 | 0.702    | 0.349    | 0.353     | 0.001            | NA                    | Hypermethylated in P3F versus P7F |
| cg27314002 | 0.605    | 0.221    | 0.384     | 0.001            | LTF                   | Hypermethylated in P3F versus P7F |
| cg16296754 | 0.635    | 0.231    | 0.404     | 0.001            | NA                    | Hypermethylated in P3F versus P7F |
| cg16066008 | 0.739    | 0.426    | 0.313     | 0.001            | NA                    | Hypermethylated in P3F versus P7F |
| cg12182991 | 0.509    | 0.060    | 0.449     | 0.001            | NA                    | Hypermethylated in P3F versus P7F |
| cg00163510 | 0.802    | 0.492    | 0.310     | 0.001            | NA                    | Hypermethylated in P3F versus P7F |

### Supplementary Table 3 (continued)

| Probe      | P3F.mean | P7F.mean | Mean.diff | Adjusted.P.value | Promoter.related.gene | Category                          |
|------------|----------|----------|-----------|------------------|-----------------------|-----------------------------------|
| cg02073465 | 0.680    | 0.403    | 0.277     | 0.001            | GCNT3                 | Hypermethylated in P3F versus P7F |
| cg20161275 | 0.809    | 0.511    | 0.299     | 0.001            | NA                    | Hypermethylated in P3F versus P7F |
| cg06027254 | 0.681    | 0.307    | 0.374     | 0.001            | NA                    | Hypermethylated in P3F versus P7F |
| cg26545918 | 0.709    | 0.456    | 0.253     | 0.001            | NA                    | Hypermethylated in P3F versus P7F |
| cg07796220 | 0.472    | 0.219    | 0.253     | 0.001            | MFSD6L                | Hypermethylated in P3F versus P7F |
| cg23944925 | 0.654    | 0.380    | 0.274     | 0.001            | NA                    | Hypermethylated in P3F versus P7F |
| cg10721834 | 0.594    | 0.242    | 0.352     | 0.001            | NA                    | Hypermethylated in P3F versus P7F |
| cg26835675 | 0.711    | 0.418    | 0.293     | 0.001            | NA                    | Hypermethylated in P3F versus P7F |
| cg13153009 | 0.756    | 0.412    | 0.344     | 0.001            | NA                    | Hypermethylated in P3F versus P7F |
| cg16594139 | 0.626    | 0.329    | 0.297     | 0.001            | HSD17B14              | Hypermethylated in P3F versus P7F |
| cg12130768 | 0.555    | 0.245    | 0.309     | 0.001            | NA                    | Hypermethylated in P3F versus P7F |
| cg16975587 | 0.599    | 0.217    | 0.381     | 0.001            | NA                    | Hypermethylated in P3F versus P7F |
| cg13588403 | 0.811    | 0.560    | 0.251     | 0.001            | NA                    | Hypermethylated in P3F versus P7F |
| cg02084087 | 0.617    | 0.327    | 0.291     | 0.001            | NA                    | Hypermethylated in P3F versus P7F |
| cg11963912 | 0.631    | 0.375    | 0.256     | 0.001            | NA                    | Hypermethylated in P3F versus P7F |
| cg25980042 | 0.718    | 0.410    | 0.309     | 0.001            | NA                    | Hypermethylated in P3F versus P7F |
| cg12295918 | 0.401    | 0.120    | 0.280     | 0.001            | LTF                   | Hypermethylated in P3F versus P7F |
| cg23097155 | 0.533    | 0.139    | 0.394     | 0.001            | FBRSL1                | Hypermethylated in P3F versus P7F |
| cg04965987 | 0.713    | 0.378    | 0.336     | 0.001            | DSCR6                 | Hypermethylated in P3F versus P7F |
| cg17298181 | 0.548    | 0.129    | 0.419     | 0.001            | NA                    | Hypermethylated in P3F versus P7F |
| cg04036049 | 0.664    | 0.400    | 0.265     | 0.001            | NA                    | Hypermethylated in P3F versus P7F |
| cg22514075 | 0.775    | 0.521    | 0.254     | 0.001            | NA                    | Hypermethylated in P3F versus P7F |
| cg14035045 | 0.618    | 0.359    | 0.259     | 0.001            | HEMK1_C3orf18         | Hypermethylated in P3F versus P7F |
| cg09793172 | 0.539    | 0.217    | 0.322     | 0.001            | KIF17                 | Hypermethylated in P3F versus P7F |
| cg18450555 | 0.450    | 0.117    | 0.333     | 0.001            | FBRSL1                | Hypermethylated in P3F versus P7F |

### Supplementary Table 3 (continued)

| Probe      | P3F.mean | P7F.mean | Mean.diff | Adjusted.P.value | Promoter.related.gene | Category                          |
|------------|----------|----------|-----------|------------------|-----------------------|-----------------------------------|
| cg18185958 | 0.699    | 0.351    | 0.348     | 0.001            | NA                    | Hypermethylated in P3F versus P7F |
| cg09537620 | 0.660    | 0.303    | 0.356     | 0.001            | NA                    | Hypermethylated in P3F versus P7F |
| cg17111846 | 0.604    | 0.338    | 0.267     | 0.001            | C1orf185              | Hypermethylated in P3F versus P7F |
| cg16465939 | 0.754    | 0.497    | 0.257     | 0.001            | NA                    | Hypermethylated in P3F versus P7F |
| cg08065063 | 0.579    | 0.289    | 0.290     | 0.001            | NA                    | Hypermethylated in P3F versus P7F |
| cg04716021 | 0.602    | 0.276    | 0.327     | 0.001            | NA                    | Hypermethylated in P3F versus P7F |
| cg26328924 | 0.640    | 0.283    | 0.357     | 0.001            | NA                    | Hypermethylated in P3F versus P7F |
| cg26927190 | 0.502    | 0.228    | 0.274     | 0.001            | NA                    | Hypermethylated in P3F versus P7F |
| cg02346492 | 0.449    | 0.077    | 0.372     | 0.001            | NA                    | Hypermethylated in P3F versus P7F |
| cg08749351 | 0.666    | 0.390    | 0.276     | 0.001            | NA                    | Hypermethylated in P3F versus P7F |
| cg03905867 | 0.590    | 0.192    | 0.398     | 0.001            | NA                    | Hypermethylated in P3F versus P7F |
| cg25755804 | 0.544    | 0.272    | 0.272     | 0.001            | NA                    | Hypermethylated in P3F versus P7F |
| cg25361844 | 0.528    | 0.159    | 0.369     | 0.001            | SIPA1                 | Hypermethylated in P3F versus P7F |
| cg02575483 | 0.730    | 0.453    | 0.278     | 0.001            | NA                    | Hypermethylated in P3F versus P7F |
| cg00413250 | 0.712    | 0.420    | 0.292     | 0.001            | NA                    | Hypermethylated in P3F versus P7F |
| cg27192854 | 0.737    | 0.471    | 0.266     | 0.001            | NA                    | Hypermethylated in P3F versus P7F |
| cg12315284 | 0.724    | 0.383    | 0.341     | 0.001            | NA                    | Hypermethylated in P3F versus P7F |
| cg00689612 | 0.692    | 0.428    | 0.264     | 0.001            | NA                    | Hypermethylated in P3F versus P7F |
| cg20373326 | 0.569    | 0.303    | 0.266     | 0.001            | HSD17B2               | Hypermethylated in P3F versus P7F |
| cg27206603 | 0.441    | 0.181    | 0.259     | 0.001            | NA                    | Hypermethylated in P3F versus P7F |
| cg22076614 | 0.685    | 0.344    | 0.341     | 0.001            | NA                    | Hypermethylated in P3F versus P7F |
| cg01568919 | 0.561    | 0.179    | 0.382     | 0.001            | FZD10                 | Hypermethylated in P3F versus P7F |
| cg21202355 | 0.435    | 0.159    | 0.276     | 0.001            | NA                    | Hypermethylated in P3F versus P7F |
| cg10692636 | 0.768    | 0.486    | 0.282     | 0.001            | NA                    | Hypermethylated in P3F versus P7F |
| cg15931168 | 0.747    | 0.426    | 0.320     | 0.001            | NA                    | Hypermethylated in P3F versus P7F |



### Supplementary Table 3 (continued)

| Probe      | P3F.mean | P7F.mean | Mean.diff | Adjusted.P.value | Promoter.related.gene | Category                          |
|------------|----------|----------|-----------|------------------|-----------------------|-----------------------------------|
| cg09315696 | 0.638    | 0.348    | 0.290     | 0.001            | NA                    | Hypermethylated in P3F versus P7F |
| cg00864474 | 0.477    | 0.127    | 0.350     | 0.001            | NA                    | Hypermethylated in P3F versus P7F |
| cg22740492 | 0.604    | 0.287    | 0.317     | 0.001            | NA                    | Hypermethylated in P3F versus P7F |
| cg21802055 | 0.453    | 0.066    | 0.388     | 0.001            | NA                    | Hypermethylated in P3F versus P7F |
| cg03585329 | 0.695    | 0.384    | 0.311     | 0.001            | NA                    | Hypermethylated in P3F versus P7F |
| cg18385371 | 0.632    | 0.367    | 0.265     | 0.001            | NA                    | Hypermethylated in P3F versus P7F |
| cg24759337 | 0.681    | 0.294    | 0.386     | 0.001            | NA                    | Hypermethylated in P3F versus P7F |
| cg13486528 | 0.589    | 0.239    | 0.350     | 0.001            | NA                    | Hypermethylated in P3F versus P7F |
| cg08379987 | 0.507    | 0.205    | 0.302     | 0.001            | NA                    | Hypermethylated in P3F versus P7F |
| cg07737175 | 0.731    | 0.457    | 0.275     | 0.001            | NA                    | Hypermethylated in P3F versus P7F |
| cg20655334 | 0.763    | 0.478    | 0.284     | 0.001            | NA                    | Hypermethylated in P3F versus P7F |
| cg25930780 | 0.450    | 0.110    | 0.340     | 0.001            | NA                    | Hypermethylated in P3F versus P7F |
| cg12813792 | 0.774    | 0.511    | 0.263     | 0.001            | C20orf85              | Hypermethylated in P3F versus P7F |
| cg26019112 | 0.594    | 0.241    | 0.353     | 0.001            | NA                    | Hypermethylated in P3F versus P7F |
| cg09990194 | 0.592    | 0.339    | 0.252     | 0.001            | NA                    | Hypermethylated in P3F versus P7F |
| cg04560213 | 0.709    | 0.431    | 0.278     | 0.001            | NA                    | Hypermethylated in P3F versus P7F |
| cg25741487 | 0.517    | 0.213    | 0.304     | 0.001            | NA                    | Hypermethylated in P3F versus P7F |
| cg14339599 | 0.515    | 0.143    | 0.373     | 0.001            | NA                    | Hypermethylated in P3F versus P7F |
| cg26886066 | 0.744    | 0.437    | 0.307     | 0.001            | NA                    | Hypermethylated in P3F versus P7F |
| cg18259003 | 0.775    | 0.442    | 0.333     | 0.001            | NA                    | Hypermethylated in P3F versus P7F |
| cg13493005 | 0.782    | 0.498    | 0.285     | 0.001            | NA                    | Hypermethylated in P3F versus P7F |
| cg26596975 | 0.756    | 0.474    | 0.282     | 0.001            | NA                    | Hypermethylated in P3F versus P7F |
| cg26058474 | 0.798    | 0.475    | 0.324     | 0.001            | NA                    | Hypermethylated in P3F versus P7F |
| cg18980554 | 0.871    | 0.533    | 0.338     | 0.001            | NA                    | Hypermethylated in P3F versus P7F |
| cg04504066 | 0.676    | 0.397    | 0.278     | 0.001            | NA                    | Hypermethylated in P3F versus P7F |

### Supplementary Table 3 (continued)

| Probe      | P3F.mean | P7F.mean | Mean.diff | Adjusted.P.value | Promoter.related.gene | Category                          |
|------------|----------|----------|-----------|------------------|-----------------------|-----------------------------------|
| cg10304922 | 0.699    | 0.351    | 0.347     | 0.001            | FBRSL1                | Hypermethylated in P3F versus P7F |
| cg10678459 | 0.587    | 0.282    | 0.304     | 0.001            | KCNQ1                 | Hypermethylated in P3F versus P7F |
| cg04910591 | 0.625    | 0.314    | 0.310     | 0.001            | NA                    | Hypermethylated in P3F versus P7F |
| cg06120235 | 0.770    | 0.518    | 0.252     | 0.001            | NA                    | Hypermethylated in P3F versus P7F |
| cg07674459 | 0.717    | 0.453    | 0.264     | 0.002            | FLJ42289              | Hypermethylated in P3F versus P7F |
| cg10503827 | 0.659    | 0.343    | 0.315     | 0.002            | NA                    | Hypermethylated in P3F versus P7F |
| cg18851960 | 0.674    | 0.356    | 0.317     | 0.002            | NA                    | Hypermethylated in P3F versus P7F |
| cg16615954 | 0.633    | 0.325    | 0.308     | 0.002            | NA                    | Hypermethylated in P3F versus P7F |
| cg10072850 | 0.631    | 0.158    | 0.474     | 0.002            | NA                    | Hypermethylated in P3F versus P7F |
| cg26430984 | 0.797    | 0.507    | 0.291     | 0.002            | NA                    | Hypermethylated in P3F versus P7F |
| cg20116555 | 0.627    | 0.335    | 0.292     | 0.002            | NA                    | Hypermethylated in P3F versus P7F |
| cg00485296 | 0.550    | 0.199    | 0.351     | 0.002            | NME3                  | Hypermethylated in P3F versus P7F |
| cg04804648 | 0.593    | 0.294    | 0.300     | 0.002            | NA                    | Hypermethylated in P3F versus P7F |
| cg19754520 | 0.806    | 0.535    | 0.272     | 0.002            | NA                    | Hypermethylated in P3F versus P7F |
| cg25906442 | 0.494    | 0.149    | 0.345     | 0.002            | C20orf85              | Hypermethylated in P3F versus P7F |
| cg12955441 | 0.394    | 0.141    | 0.253     | 0.002            | CCDC68                | Hypermethylated in P3F versus P7F |
| cg07759247 | 0.656    | 0.344    | 0.312     | 0.002            | NA                    | Hypermethylated in P3F versus P7F |
| cg22400303 | 0.737    | 0.453    | 0.284     | 0.002            | NA                    | Hypermethylated in P3F versus P7F |
| cg11832722 | 0.447    | 0.170    | 0.276     | 0.002            | DSC3                  | Hypermethylated in P3F versus P7F |
| cg08116462 | 0.645    | 0.330    | 0.315     | 0.002            | NA                    | Hypermethylated in P3F versus P7F |
| cg06282596 | 0.727    | 0.390    | 0.338     | 0.002            | NA                    | Hypermethylated in P3F versus P7F |
| cg10270430 | 0.710    | 0.390    | 0.320     | 0.002            | NA                    | Hypermethylated in P3F versus P7F |
| cg04011925 | 0.676    | 0.407    | 0.269     | 0.002            | NA                    | Hypermethylated in P3F versus P7F |
| cg23287710 | 0.632    | 0.377    | 0.254     | 0.002            | NA                    | Hypermethylated in P3F versus P7F |
| cg26833602 | 0.382    | 0.127    | 0.255     | 0.002            | NA                    | Hypermethylated in P3F versus P7F |

### Supplementary Table 3 (continued)

| Probe      | P3F.mean | P7F.mean | Mean.diff | Adjusted.P.value | Promoter.related.gene | Category                          |
|------------|----------|----------|-----------|------------------|-----------------------|-----------------------------------|
| cg14210726 | 0.694    | 0.408    | 0.286     | 0.002            | NA                    | Hypermethylated in P3F versus P7F |
| cg16155858 | 0.659    | 0.369    | 0.290     | 0.002            | NA                    | Hypermethylated in P3F versus P7F |
| cg00372375 | 0.712    | 0.348    | 0.364     | 0.002            | MFHAS1                | Hypermethylated in P3F versus P7F |
| cg18869061 | 0.760    | 0.363    | 0.397     | 0.002            | NA                    | Hypermethylated in P3F versus P7F |
| cg25446890 | 0.676    | 0.387    | 0.288     | 0.002            | NA                    | Hypermethylated in P3F versus P7F |
| cg24351901 | 0.547    | 0.251    | 0.296     | 0.002            | NA                    | Hypermethylated in P3F versus P7F |
| cg07403865 | 0.521    | 0.173    | 0.348     | 0.002            | NA                    | Hypermethylated in P3F versus P7F |
| cg06023994 | 0.775    | 0.465    | 0.310     | 0.002            | NA                    | Hypermethylated in P3F versus P7F |
| cg09164206 | 0.797    | 0.497    | 0.300     | 0.002            | NA                    | Hypermethylated in P3F versus P7F |
| cg25019648 | 0.608    | 0.172    | 0.436     | 0.002            | NA                    | Hypermethylated in P3F versus P7F |
| cg26749245 | 0.615    | 0.307    | 0.307     | 0.002            | NA                    | Hypermethylated in P3F versus P7F |
| cg25207248 | 0.496    | 0.184    | 0.311     | 0.002            | NA                    | Hypermethylated in P3F versus P7F |
| cg19595750 | 0.708    | 0.331    | 0.377     | 0.002            | FBRSL1                | Hypermethylated in P3F versus P7F |
| cg07581395 | 0.486    | 0.209    | 0.277     | 0.002            | NA                    | Hypermethylated in P3F versus P7F |
| cg01303141 | 0.745    | 0.461    | 0.284     | 0.002            | NA                    | Hypermethylated in P3F versus P7F |
| cg16315106 | 0.748    | 0.476    | 0.272     | 0.002            | NA                    | Hypermethylated in P3F versus P7F |
| cg18842310 | 0.580    | 0.281    | 0.299     | 0.002            | NA                    | Hypermethylated in P3F versus P7F |
| cg10724576 | 0.765    | 0.510    | 0.255     | 0.002            | NA                    | Hypermethylated in P3F versus P7F |
| cg19367256 | 0.729    | 0.435    | 0.295     | 0.002            | NA                    | Hypermethylated in P3F versus P7F |
| cg11214243 | 0.412    | 0.103    | 0.309     | 0.002            | SIPA1                 | Hypermethylated in P3F versus P7F |
| cg20474425 | 0.626    | 0.274    | 0.351     | 0.002            | NA                    | Hypermethylated in P3F versus P7F |
| cg26882224 | 0.795    | 0.515    | 0.280     | 0.002            | NA                    | Hypermethylated in P3F versus P7F |
| cg23125492 | 0.592    | 0.289    | 0.303     | 0.002            | NA                    | Hypermethylated in P3F versus P7F |
| cg07484827 | 0.683    | 0.397    | 0.286     | 0.002            | CHRNA10               | Hypermethylated in P3F versus P7F |
| cg18603228 | 0.433    | 0.107    | 0.326     | 0.002            | FBLN2                 | Hypermethylated in P3F versus P7F |

### Supplementary Table 3 (continued)

| Probe      | P3F.mean | P7F.mean | Mean.diff | Adjusted.P.value | Promoter.related.gene | Category                          |
|------------|----------|----------|-----------|------------------|-----------------------|-----------------------------------|
| cg15613048 | 0.564    | 0.188    | 0.376     | 0.002            | KIF17                 | Hypermethylated in P3F versus P7F |
| cg19155932 | 0.479    | 0.161    | 0.318     | 0.002            | C20orf85              | Hypermethylated in P3F versus P7F |
| cg21428954 | 0.711    | 0.396    | 0.315     | 0.002            | NA                    | Hypermethylated in P3F versus P7F |
| cg16503628 | 0.782    | 0.496    | 0.286     | 0.002            | NA                    | Hypermethylated in P3F versus P7F |
| cg04982308 | 0.731    | 0.319    | 0.413     | 0.002            | NA                    | Hypermethylated in P3F versus P7F |
| cg21545857 | 0.675    | 0.421    | 0.254     | 0.002            | NA                    | Hypermethylated in P3F versus P7F |
| cg05617413 | 0.684    | 0.321    | 0.363     | 0.002            | FBRSL1                | Hypermethylated in P3F versus P7F |
| cg08368094 | 0.722    | 0.469    | 0.253     | 0.002            | NA                    | Hypermethylated in P3F versus P7F |
| cg24800655 | 0.630    | 0.296    | 0.334     | 0.002            | FBRSL1                | Hypermethylated in P3F versus P7F |
| cg10943191 | 0.454    | 0.162    | 0.292     | 0.002            | NA                    | Hypermethylated in P3F versus P7F |
| cg20265748 | 0.745    | 0.449    | 0.296     | 0.002            | NA                    | Hypermethylated in P3F versus P7F |
| cg07994696 | 0.637    | 0.361    | 0.276     | 0.002            | LITAF                 | Hypermethylated in P3F versus P7F |
| cg03933131 | 0.401    | 0.133    | 0.268     | 0.002            | LTF                   | Hypermethylated in P3F versus P7F |
| cg02351655 | 0.729    | 0.450    | 0.279     | 0.002            | NA                    | Hypermethylated in P3F versus P7F |
| cg05514909 | 0.694    | 0.312    | 0.383     | 0.002            | NA                    | Hypermethylated in P3F versus P7F |
| cg06422883 | 0.674    | 0.332    | 0.342     | 0.002            | NA                    | Hypermethylated in P3F versus P7F |
| cg25647300 | 0.638    | 0.375    | 0.262     | 0.002            | NA                    | Hypermethylated in P3F versus P7F |
| cg16886987 | 0.724    | 0.383    | 0.341     | 0.002            | DSCR6                 | Hypermethylated in P3F versus P7F |
| cg02247591 | 0.455    | 0.133    | 0.322     | 0.002            | NA                    | Hypermethylated in P3F versus P7F |
| cg08554536 | 0.752    | 0.501    | 0.251     | 0.002            | NA                    | Hypermethylated in P3F versus P7F |
| cg23491743 | 0.756    | 0.443    | 0.313     | 0.002            | NA                    | Hypermethylated in P3F versus P7F |
| cg07688604 | 0.652    | 0.327    | 0.326     | 0.002            | FBRSL1                | Hypermethylated in P3F versus P7F |
| cg22660447 | 0.655    | 0.343    | 0.311     | 0.002            | NA                    | Hypermethylated in P3F versus P7F |
| cg19228647 | 0.616    | 0.335    | 0.282     | 0.002            | NA                    | Hypermethylated in P3F versus P7F |
| cg17566325 | 0.598    | 0.250    | 0.348     | 0.002            | NA                    | Hypermethylated in P3F versus P7F |

### Supplementary Table 3 (continued)

| Probe      | P3F.mean | P7F.mean | Mean.diff | Adjusted.P.value | Promoter.related.gene | Category                          |
|------------|----------|----------|-----------|------------------|-----------------------|-----------------------------------|
| cg22850587 | 0.391    | 0.072    | 0.319     | 0.002            | NA                    | Hypermethylated in P3F versus P7F |
| cg17343253 | 0.650    | 0.338    | 0.312     | 0.002            | NA                    | Hypermethylated in P3F versus P7F |
| cg13037201 | 0.614    | 0.264    | 0.350     | 0.002            | NA                    | Hypermethylated in P3F versus P7F |
| cg25611369 | 0.637    | 0.332    | 0.305     | 0.002            | NA                    | Hypermethylated in P3F versus P7F |
| cg09991306 | 0.749    | 0.374    | 0.376     | 0.002            | NA                    | Hypermethylated in P3F versus P7F |
| cg18409732 | 0.603    | 0.231    | 0.373     | 0.002            | NA                    | Hypermethylated in P3F versus P7F |
| cg02343962 | 0.703    | 0.357    | 0.346     | 0.002            | NA                    | Hypermethylated in P3F versus P7F |
| cg00100703 | 0.706    | 0.453    | 0.253     | 0.002            | NA                    | Hypermethylated in P3F versus P7F |
| cg21202178 | 0.681    | 0.408    | 0.273     | 0.002            | NA                    | Hypermethylated in P3F versus P7F |
| cg00900231 | 0.842    | 0.542    | 0.301     | 0.002            | NA                    | Hypermethylated in P3F versus P7F |
| cg13724379 | 0.475    | 0.118    | 0.357     | 0.002            | NA                    | Hypermethylated in P3F versus P7F |
| cg12977772 | 0.598    | 0.303    | 0.295     | 0.002            | NA                    | Hypermethylated in P3F versus P7F |
| cg13133304 | 0.712    | 0.433    | 0.279     | 0.002            | NA                    | Hypermethylated in P3F versus P7F |
| cg12643917 | 0.687    | 0.280    | 0.408     | 0.002            | NA                    | Hypermethylated in P3F versus P7F |
| cg17527798 | 0.608    | 0.308    | 0.301     | 0.002            | LTF                   | Hypermethylated in P3F versus P7F |
| cg25902939 | 0.699    | 0.335    | 0.364     | 0.002            | NA                    | Hypermethylated in P3F versus P7F |
| cg15849703 | 0.650    | 0.391    | 0.260     | 0.002            | NA                    | Hypermethylated in P3F versus P7F |
| cg24138419 | 0.771    | 0.517    | 0.254     | 0.002            | NA                    | Hypermethylated in P3F versus P7F |
| cg23675401 | 0.441    | 0.142    | 0.298     | 0.002            | NA                    | Hypermethylated in P3F versus P7F |
| cg10265258 | 0.790    | 0.524    | 0.266     | 0.002            | NA                    | Hypermethylated in P3F versus P7F |
| cg12975790 | 0.747    | 0.463    | 0.284     | 0.002            | NA                    | Hypermethylated in P3F versus P7F |
| cg17145370 | 0.664    | 0.361    | 0.303     | 0.002            | NA                    | Hypermethylated in P3F versus P7F |
| cg19244562 | 0.736    | 0.441    | 0.295     | 0.002            | NA                    | Hypermethylated in P3F versus P7F |
| cg16498194 | 0.421    | 0.171    | 0.251     | 0.002            | FZD10                 | Hypermethylated in P3F versus P7F |
| cg13399544 | 0.621    | 0.353    | 0.268     | 0.002            | NA                    | Hypermethylated in P3F versus P7F |

### Supplementary Table 3 (continued)

| Probe      | P3F.mean | P7F.mean | Mean.diff | Adjusted.P.value | Promoter.related.gene | Category                          |
|------------|----------|----------|-----------|------------------|-----------------------|-----------------------------------|
| cg05092308 | 0.518    | 0.184    | 0.333     | 0.002            | NA                    | Hypermethylated in P3F versus P7F |
| cg01156550 | 0.619    | 0.280    | 0.340     | 0.002            | ASCL2                 | Hypermethylated in P3F versus P7F |
| cg25147622 | 0.762    | 0.502    | 0.260     | 0.002            | NA                    | Hypermethylated in P3F versus P7F |
| cg06539449 | 0.710    | 0.356    | 0.355     | 0.002            | NA                    | Hypermethylated in P3F versus P7F |
| cg02455820 | 0.611    | 0.226    | 0.385     | 0.002            | NA                    | Hypermethylated in P3F versus P7F |
| cg20367852 | 0.502    | 0.167    | 0.335     | 0.002            | NA                    | Hypermethylated in P3F versus P7F |
| cg08651867 | 0.389    | 0.089    | 0.300     | 0.002            | NA                    | Hypermethylated in P3F versus P7F |
| cg04098176 | 0.763    | 0.506    | 0.257     | 0.002            | TSPYL6                | Hypermethylated in P3F versus P7F |
| cg04411052 | 0.707    | 0.396    | 0.310     | 0.002            | NA                    | Hypermethylated in P3F versus P7F |
| cg08528970 | 0.580    | 0.307    | 0.272     | 0.002            | NA                    | Hypermethylated in P3F versus P7F |
| cg02983759 | 0.648    | 0.386    | 0.262     | 0.002            | NCRNA00111            | Hypermethylated in P3F versus P7F |
| cg18362448 | 0.717    | 0.366    | 0.351     | 0.002            | NA                    | Hypermethylated in P3F versus P7F |
| cg03893150 | 0.547    | 0.225    | 0.323     | 0.002            | TNFRSF25              | Hypermethylated in P3F versus P7F |
| cg20562447 | 0.508    | 0.170    | 0.338     | 0.002            | NA                    | Hypermethylated in P3F versus P7F |
| cg15164180 | 0.497    | 0.246    | 0.251     | 0.002            | NA                    | Hypermethylated in P3F versus P7F |
| cg03254538 | 0.633    | 0.381    | 0.252     | 0.002            | NA                    | Hypermethylated in P3F versus P7F |
| cg00225830 | 0.801    | 0.512    | 0.289     | 0.002            | NA                    | Hypermethylated in P3F versus P7F |
| cg16090330 | 0.701    | 0.435    | 0.265     | 0.002            | NA                    | Hypermethylated in P3F versus P7F |
| cg23733845 | 0.724    | 0.445    | 0.279     | 0.002            | NA                    | Hypermethylated in P3F versus P7F |
| cg27419327 | 0.459    | 0.178    | 0.282     | 0.002            | NA                    | Hypermethylated in P3F versus P7F |
| cg05038469 | 0.695    | 0.409    | 0.286     | 0.002            | NA                    | Hypermethylated in P3F versus P7F |
| cg19800032 | 0.714    | 0.373    | 0.341     | 0.002            | NA                    | Hypermethylated in P3F versus P7F |
| cg19216817 | 0.648    | 0.395    | 0.253     | 0.002            | NA                    | Hypermethylated in P3F versus P7F |
| cg17679987 | 0.658    | 0.406    | 0.252     | 0.002            | NA                    | Hypermethylated in P3F versus P7F |
| cg17680089 | 0.819    | 0.515    | 0.305     | 0.002            | NA                    | Hypermethylated in P3F versus P7F |

### Supplementary Table 3 (continued)

| Probe      | P3F.mean | P7F.mean | Mean.diff | Adjusted.P.value | Promoter.related.gene | Category                          |
|------------|----------|----------|-----------|------------------|-----------------------|-----------------------------------|
| cg05163329 | 0.752    | 0.443    | 0.309     | 0.002            | NA                    | Hypermethylated in P3F versus P7F |
| cg19431274 | 0.565    | 0.297    | 0.269     | 0.002            | NA                    | Hypermethylated in P3F versus P7F |
| cg08369872 | 0.533    | 0.108    | 0.425     | 0.002            | DERL3                 | Hypermethylated in P3F versus P7F |
| cg08683147 | 0.808    | 0.549    | 0.259     | 0.002            | NA                    | Hypermethylated in P3F versus P7F |
| cg17142432 | 0.676    | 0.310    | 0.366     | 0.002            | NA                    | Hypermethylated in P3F versus P7F |
| cg04624110 | 0.439    | 0.124    | 0.315     | 0.002            | MACROD2               | Hypermethylated in P3F versus P7F |
| cg05575614 | 0.432    | 0.121    | 0.311     | 0.002            | NA                    | Hypermethylated in P3F versus P7F |
| cg10776862 | 0.471    | 0.186    | 0.285     | 0.002            | NA                    | Hypermethylated in P3F versus P7F |
| cg24136700 | 0.633    | 0.325    | 0.308     | 0.002            | NA                    | Hypermethylated in P3F versus P7F |
| cg27333099 | 0.635    | 0.381    | 0.253     | 0.002            | BTNL8                 | Hypermethylated in P3F versus P7F |
| cg16574871 | 0.532    | 0.282    | 0.251     | 0.002            | NA                    | Hypermethylated in P3F versus P7F |
| cg02646021 | 0.719    | 0.388    | 0.331     | 0.002            | NA                    | Hypermethylated in P3F versus P7F |
| cg13525877 | 0.809    | 0.529    | 0.280     | 0.002            | NA                    | Hypermethylated in P3F versus P7F |
| cg07333715 | 0.615    | 0.215    | 0.400     | 0.002            | ASCL2                 | Hypermethylated in P3F versus P7F |
| cg12932306 | 0.520    | 0.223    | 0.297     | 0.002            | NA                    | Hypermethylated in P3F versus P7F |
| cg14500486 | 0.589    | 0.225    | 0.365     | 0.002            | NA                    | Hypermethylated in P3F versus P7F |
| cg06878108 | 0.653    | 0.385    | 0.269     | 0.002            | NA                    | Hypermethylated in P3F versus P7F |
| cg08458733 | 0.624    | 0.325    | 0.298     | 0.002            | NA                    | Hypermethylated in P3F versus P7F |
| cg06482019 | 0.544    | 0.162    | 0.382     | 0.002            | NA                    | Hypermethylated in P3F versus P7F |
| cg15671317 | 0.627    | 0.327    | 0.301     | 0.002            | NA                    | Hypermethylated in P3F versus P7F |
| cg11433622 | 0.597    | 0.175    | 0.422     | 0.002            | NA                    | Hypermethylated in P3F versus P7F |
| cg05690644 | 0.469    | 0.146    | 0.323     | 0.002            | NA                    | Hypermethylated in P3F versus P7F |
| cg03087163 | 0.697    | 0.368    | 0.330     | 0.003            | NA                    | Hypermethylated in P3F versus P7F |
| cg18562935 | 0.683    | 0.382    | 0.300     | 0.003            | C20orf85              | Hypermethylated in P3F versus P7F |
| cg25478037 | 0.834    | 0.526    | 0.308     | 0.003            | NA                    | Hypermethylated in P3F versus P7F |

### Supplementary Table 3 (continued)

| Probe      | P3F.mean | P7F.mean | Mean.diff | Adjusted.P.value | Promoter.related.gene | Category                          |
|------------|----------|----------|-----------|------------------|-----------------------|-----------------------------------|
| cg11469061 | 0.622    | 0.292    | 0.329     | 0.003            | NA                    | Hypermethylated in P3F versus P7F |
| cg17345450 | 0.658    | 0.397    | 0.262     | 0.003            | NA                    | Hypermethylated in P3F versus P7F |
| cg17620121 | 0.408    | 0.102    | 0.306     | 0.003            | C7orf20               | Hypermethylated in P3F versus P7F |
| cg25825627 | 0.584    | 0.228    | 0.356     | 0.003            | NA                    | Hypermethylated in P3F versus P7F |
| cg04777726 | 0.739    | 0.419    | 0.320     | 0.003            | HSD17B14              | Hypermethylated in P3F versus P7F |
| cg01636650 | 0.805    | 0.542    | 0.263     | 0.003            | NA                    | Hypermethylated in P3F versus P7F |
| cg19945931 | 0.677    | 0.271    | 0.406     | 0.003            | NA                    | Hypermethylated in P3F versus P7F |
| cg07146104 | 0.690    | 0.436    | 0.254     | 0.003            | NA                    | Hypermethylated in P3F versus P7F |
| cg01618102 | 0.814    | 0.560    | 0.254     | 0.003            | NA                    | Hypermethylated in P3F versus P7F |
| cg03080965 | 0.552    | 0.208    | 0.344     | 0.003            | NME3                  | Hypermethylated in P3F versus P7F |
| cg02246426 | 0.604    | 0.315    | 0.289     | 0.003            | NA                    | Hypermethylated in P3F versus P7F |
| cg08222913 | 0.662    | 0.386    | 0.276     | 0.003            | NA                    | Hypermethylated in P3F versus P7F |
| cg09322259 | 0.357    | 0.055    | 0.302     | 0.003            | NA                    | Hypermethylated in P3F versus P7F |
| cg07225966 | 0.581    | 0.199    | 0.381     | 0.003            | CYP26C1               | Hypermethylated in P3F versus P7F |
| cg15644671 | 0.720    | 0.421    | 0.299     | 0.003            | CYP26C1               | Hypermethylated in P3F versus P7F |
| cg23169957 | 0.381    | 0.112    | 0.268     | 0.003            | MACROD2               | Hypermethylated in P3F versus P7F |
| cg07861790 | 0.767    | 0.477    | 0.290     | 0.003            | NA                    | Hypermethylated in P3F versus P7F |
| cg00070899 | 0.704    | 0.355    | 0.348     | 0.003            | NA                    | Hypermethylated in P3F versus P7F |
| cg02276807 | 0.635    | 0.234    | 0.401     | 0.003            | NA                    | Hypermethylated in P3F versus P7F |
| cg18499839 | 0.368    | 0.080    | 0.289     | 0.003            | NA                    | Hypermethylated in P3F versus P7F |
| cg16710124 | 0.774    | 0.415    | 0.359     | 0.003            | NA                    | Hypermethylated in P3F versus P7F |
| cg03774514 | 0.479    | 0.141    | 0.337     | 0.003            | NA                    | Hypermethylated in P3F versus P7F |
| cg23669855 | 0.751    | 0.424    | 0.328     | 0.003            | NA                    | Hypermethylated in P3F versus P7F |
| cg20723436 | 0.588    | 0.329    | 0.259     | 0.003            | NA                    | Hypermethylated in P3F versus P7F |
| cg04938549 | 0.640    | 0.369    | 0.270     | 0.003            | NA                    | Hypermethylated in P3F versus P7F |



### Supplementary Table 3 (continued)

| Probe      | P3F.mean | P7F.mean | Mean.diff | Adjusted.P.value | Promoter.related.gene | Category                          |
|------------|----------|----------|-----------|------------------|-----------------------|-----------------------------------|
| cg24980572 | 0.676    | 0.341    | 0.334     | 0.003            | NA                    | Hypermethylated in P3F versus P7F |
| cg06147752 | 0.756    | 0.454    | 0.302     | 0.003            | NA                    | Hypermethylated in P3F versus P7F |
| cg09267483 | 0.620    | 0.261    | 0.359     | 0.003            | NA                    | Hypermethylated in P3F versus P7F |
| cg01896761 | 0.525    | 0.141    | 0.384     | 0.003            | FBLN2                 | Hypermethylated in P3F versus P7F |
| cg25074426 | 0.634    | 0.336    | 0.299     | 0.003            | NA                    | Hypermethylated in P3F versus P7F |
| cg24974704 | 0.709    | 0.413    | 0.296     | 0.003            | NA                    | Hypermethylated in P3F versus P7F |
| cg04220104 | 0.707    | 0.435    | 0.272     | 0.003            | NA                    | Hypermethylated in P3F versus P7F |
| cg18437209 | 0.507    | 0.217    | 0.290     | 0.003            | NA                    | Hypermethylated in P3F versus P7F |
| cg16202340 | 0.379    | 0.080    | 0.299     | 0.003            | NA                    | Hypermethylated in P3F versus P7F |
| cg05901357 | 0.541    | 0.197    | 0.344     | 0.003            | NA                    | Hypermethylated in P3F versus P7F |
| cg15101980 | 0.528    | 0.277    | 0.251     | 0.003            | ARSI                  | Hypermethylated in P3F versus P7F |
| cg16167052 | 0.702    | 0.412    | 0.290     | 0.003            | PNMAL2                | Hypermethylated in P3F versus P7F |
| cg05090695 | 0.478    | 0.133    | 0.345     | 0.003            | CDKN1C                | Hypermethylated in P3F versus P7F |
| cg08534443 | 0.621    | 0.319    | 0.303     | 0.003            | NA                    | Hypermethylated in P3F versus P7F |
| cg16616521 | 0.622    | 0.225    | 0.397     | 0.003            | NA                    | Hypermethylated in P3F versus P7F |
| cg23574802 | 0.615    | 0.283    | 0.332     | 0.003            | NA                    | Hypermethylated in P3F versus P7F |
| cg19618897 | 0.583    | 0.327    | 0.256     | 0.003            | NA                    | Hypermethylated in P3F versus P7F |
| cg24758426 | 0.602    | 0.200    | 0.402     | 0.003            | NA                    | Hypermethylated in P3F versus P7F |
| cg18471929 | 0.817    | 0.567    | 0.250     | 0.003            | NA                    | Hypermethylated in P3F versus P7F |
| cg18531916 | 0.712    | 0.431    | 0.281     | 0.003            | NA                    | Hypermethylated in P3F versus P7F |
| cg19640526 | 0.677    | 0.324    | 0.353     | 0.003            | NA                    | Hypermethylated in P3F versus P7F |
| cg26731327 | 0.478    | 0.110    | 0.368     | 0.003            | NA                    | Hypermethylated in P3F versus P7F |
| cg20202112 | 0.878    | 0.625    | 0.253     | 0.003            | DCTN1                 | Hypermethylated in P3F versus P7F |
| cg01782059 | 0.731    | 0.330    | 0.401     | 0.003            | NA                    | Hypermethylated in P3F versus P7F |
| cg23726831 | 0.733    | 0.420    | 0.312     | 0.003            | NA                    | Hypermethylated in P3F versus P7F |

### Supplementary Table 3 (continued)

| Probe      | P3F.mean | P7F.mean | Mean.diff | Adjusted.P.value | Promoter.related.gene | Category                          |
|------------|----------|----------|-----------|------------------|-----------------------|-----------------------------------|
| cg12348588 | 0.703    | 0.379    | 0.323     | 0.003            | NA                    | Hypermethylated in P3F versus P7F |
| cg11453712 | 0.679    | 0.294    | 0.385     | 0.003            | PHPT1                 | Hypermethylated in P3F versus P7F |
| cg11756870 | 0.467    | 0.202    | 0.265     | 0.003            | NA                    | Hypermethylated in P3F versus P7F |
| cg11417653 | 0.504    | 0.136    | 0.369     | 0.003            | DERL3                 | Hypermethylated in P3F versus P7F |
| cg20229800 | 0.646    | 0.347    | 0.299     | 0.003            | NA                    | Hypermethylated in P3F versus P7F |
| cg14073497 | 0.568    | 0.199    | 0.370     | 0.003            | NA                    | Hypermethylated in P3F versus P7F |
| cg11392776 | 0.631    | 0.315    | 0.317     | 0.003            | NA                    | Hypermethylated in P3F versus P7F |
| cg17789713 | 0.761    | 0.477    | 0.285     | 0.003            | NA                    | Hypermethylated in P3F versus P7F |
| cg18067847 | 0.662    | 0.324    | 0.338     | 0.003            | DYSF                  | Hypermethylated in P3F versus P7F |
| cg27244773 | 0.789    | 0.473    | 0.316     | 0.003            | ARHGAP27              | Hypermethylated in P3F versus P7F |
| cg04600253 | 0.756    | 0.475    | 0.281     | 0.003            | NA                    | Hypermethylated in P3F versus P7F |
| cg07889505 | 0.645    | 0.286    | 0.359     | 0.003            | NA                    | Hypermethylated in P3F versus P7F |
| cg16681199 | 0.562    | 0.275    | 0.286     | 0.003            | NA                    | Hypermethylated in P3F versus P7F |
| cg23708763 | 0.695    | 0.398    | 0.297     | 0.003            | NA                    | Hypermethylated in P3F versus P7F |
| cg02993069 | 0.558    | 0.295    | 0.263     | 0.003            | NA                    | Hypermethylated in P3F versus P7F |
| cg07655948 | 0.615    | 0.259    | 0.356     | 0.003            | C20orf85              | Hypermethylated in P3F versus P7F |
| cg12161971 | 0.852    | 0.527    | 0.325     | 0.003            | NA                    | Hypermethylated in P3F versus P7F |
| cg25386707 | 0.613    | 0.325    | 0.288     | 0.003            | NA                    | Hypermethylated in P3F versus P7F |
| cg12782180 | 0.462    | 0.195    | 0.267     | 0.003            | LEP                   | Hypermethylated in P3F versus P7F |
| cg13617561 | 0.762    | 0.463    | 0.299     | 0.003            | CABP4                 | Hypermethylated in P3F versus P7F |
| cg17743250 | 0.694    | 0.359    | 0.335     | 0.003            | CYP26C1               | Hypermethylated in P3F versus P7F |
| cg20299697 | 0.733    | 0.469    | 0.265     | 0.003            | NA                    | Hypermethylated in P3F versus P7F |
| cg16254756 | 0.559    | 0.305    | 0.254     | 0.003            | SHC1                  | Hypermethylated in P3F versus P7F |
| cg11521563 | 0.757    | 0.453    | 0.305     | 0.003            | NA                    | Hypermethylated in P3F versus P7F |
| cg15455864 | 0.418    | 0.145    | 0.273     | 0.003            | RSPH6A                | Hypermethylated in P3F versus P7F |

### Supplementary Table 3 (continued)

| Probe      | P3F.mean | P7F.mean | Mean.diff | Adjusted.P.value | Promoter.related.gene | Category                          |
|------------|----------|----------|-----------|------------------|-----------------------|-----------------------------------|
| cg13403586 | 0.583    | 0.239    | 0.345     | 0.003            | NA                    | Hypermethylated in P3F versus P7F |
| cg14446604 | 0.606    | 0.342    | 0.263     | 0.003            | NA                    | Hypermethylated in P3F versus P7F |
| cg23733384 | 0.807    | 0.498    | 0.309     | 0.003            | NA                    | Hypermethylated in P3F versus P7F |
| cg24831051 | 0.763    | 0.395    | 0.367     | 0.003            | NA                    | Hypermethylated in P3F versus P7F |
| cg18406197 | 0.343    | 0.083    | 0.260     | 0.003            | FBLN2                 | Hypermethylated in P3F versus P7F |
| cg18356785 | 0.719    | 0.381    | 0.337     | 0.003            | NA                    | Hypermethylated in P3F versus P7F |
| cg15634928 | 0.759    | 0.503    | 0.256     | 0.003            | NA                    | Hypermethylated in P3F versus P7F |
| cg17508941 | 0.626    | 0.355    | 0.271     | 0.003            | NA                    | Hypermethylated in P3F versus P7F |
| cg26271127 | 0.457    | 0.098    | 0.358     | 0.003            | NA                    | Hypermethylated in P3F versus P7F |
| cg24324985 | 0.518    | 0.188    | 0.330     | 0.003            | FOXA2                 | Hypermethylated in P3F versus P7F |
| cg02270412 | 0.721    | 0.424    | 0.296     | 0.003            | NA                    | Hypermethylated in P3F versus P7F |
| cg09229918 | 0.487    | 0.126    | 0.361     | 0.003            | NA                    | Hypermethylated in P3F versus P7F |
| cg23866403 | 0.624    | 0.298    | 0.326     | 0.003            | NA                    | Hypermethylated in P3F versus P7F |
| cg20307391 | 0.711    | 0.426    | 0.285     | 0.003            | NA                    | Hypermethylated in P3F versus P7F |
| cg10528455 | 0.746    | 0.471    | 0.276     | 0.003            | NA                    | Hypermethylated in P3F versus P7F |
| cg23892836 | 0.610    | 0.345    | 0.265     | 0.003            | NA                    | Hypermethylated in P3F versus P7F |
| cg13694343 | 0.693    | 0.429    | 0.264     | 0.003            | NA                    | Hypermethylated in P3F versus P7F |
| cg19272348 | 0.746    | 0.471    | 0.275     | 0.003            | NA                    | Hypermethylated in P3F versus P7F |
| cg23953174 | 0.367    | 0.098    | 0.269     | 0.003            | CD3EAP_PPP1R13L       | Hypermethylated in P3F versus P7F |
| cg23225147 | 0.455    | 0.174    | 0.281     | 0.003            | CDKN1C                | Hypermethylated in P3F versus P7F |
| cg23497016 | 0.607    | 0.197    | 0.410     | 0.003            | NA                    | Hypermethylated in P3F versus P7F |
| cg23681339 | 0.554    | 0.279    | 0.275     | 0.003            | FBRSL1                | Hypermethylated in P3F versus P7F |
| cg26529516 | 0.466    | 0.200    | 0.266     | 0.003            | ARFGAP3               | Hypermethylated in P3F versus P7F |
| cg13762320 | 0.714    | 0.423    | 0.291     | 0.003            | ASCL2                 | Hypermethylated in P3F versus P7F |
| cg06330691 | 0.457    | 0.147    | 0.310     | 0.003            | NA                    | Hypermethylated in P3F versus P7F |

### Supplementary Table 3 (continued)

| Probe      | P3F.mean | P7F.mean | Mean.diff | Adjusted.P.value | Promoter.related.gene | Category                          |
|------------|----------|----------|-----------|------------------|-----------------------|-----------------------------------|
| cg16060204 | 0.586    | 0.257    | 0.328     | 0.003            | NA                    | Hypermethylated in P3F versus P7F |
| cg14881470 | 0.456    | 0.144    | 0.312     | 0.003            | NA                    | Hypermethylated in P3F versus P7F |
| cg03593471 | 0.699    | 0.446    | 0.253     | 0.003            | NA                    | Hypermethylated in P3F versus P7F |
| cg27485108 | 0.424    | 0.155    | 0.269     | 0.003            | NA                    | Hypermethylated in P3F versus P7F |
| cg10791959 | 0.672    | 0.310    | 0.362     | 0.003            | NA                    | Hypermethylated in P3F versus P7F |
| cg19916659 | 0.622    | 0.369    | 0.253     | 0.003            | NA                    | Hypermethylated in P3F versus P7F |
| cg06032735 | 0.627    | 0.361    | 0.266     | 0.003            | NA                    | Hypermethylated in P3F versus P7F |
| cg11128216 | 0.818    | 0.548    | 0.269     | 0.003            | NA                    | Hypermethylated in P3F versus P7F |
| cg20079298 | 0.735    | 0.411    | 0.324     | 0.003            | NA                    | Hypermethylated in P3F versus P7F |
| cg17480646 | 0.417    | 0.096    | 0.320     | 0.003            | SIPA1                 | Hypermethylated in P3F versus P7F |
| cg20322977 | 0.515    | 0.219    | 0.296     | 0.003            | CYP26C1               | Hypermethylated in P3F versus P7F |
| cg01022370 | 0.694    | 0.368    | 0.327     | 0.003            | MFHAS1                | Hypermethylated in P3F versus P7F |
| cg10113194 | 0.628    | 0.289    | 0.339     | 0.003            | NA                    | Hypermethylated in P3F versus P7F |
| cg18908185 | 0.718    | 0.428    | 0.290     | 0.003            | NA                    | Hypermethylated in P3F versus P7F |
| cg11449860 | 0.625    | 0.353    | 0.272     | 0.003            | NA                    | Hypermethylated in P3F versus P7F |
| cg25083618 | 0.604    | 0.250    | 0.354     | 0.003            | CYP26C1               | Hypermethylated in P3F versus P7F |
| cg03020208 | 0.697    | 0.379    | 0.318     | 0.003            | AQP5                  | Hypermethylated in P3F versus P7F |
| cg27239981 | 0.641    | 0.355    | 0.285     | 0.003            | NA                    | Hypermethylated in P3F versus P7F |
| cg22991320 | 0.506    | 0.161    | 0.345     | 0.003            | C20orf85              | Hypermethylated in P3F versus P7F |
| cg09160776 | 0.562    | 0.290    | 0.273     | 0.003            | NA                    | Hypermethylated in P3F versus P7F |
| cg15254559 | 0.522    | 0.248    | 0.274     | 0.003            | NA                    | Hypermethylated in P3F versus P7F |
| cg06040811 | 0.694    | 0.367    | 0.327     | 0.003            | NA                    | Hypermethylated in P3F versus P7F |
| cg11090202 | 0.484    | 0.221    | 0.263     | 0.003            | NA                    | Hypermethylated in P3F versus P7F |
| cg17740434 | 0.680    | 0.374    | 0.307     | 0.003            | NA                    | Hypermethylated in P3F versus P7F |
| cg25721132 | 0.508    | 0.211    | 0.298     | 0.003            | NA                    | Hypermethylated in P3F versus P7F |

### Supplementary Table 3 (continued)

| Probe      | P3F.mean | P7F.mean | Mean.diff | Adjusted.P.value | Promoter.related.gene | Category                          |
|------------|----------|----------|-----------|------------------|-----------------------|-----------------------------------|
| cg21421278 | 0.448    | 0.143    | 0.305     | 0.003            | NA                    | Hypermethylated in P3F versus P7F |
| cg00716083 | 0.533    | 0.248    | 0.285     | 0.003            | LTF                   | Hypermethylated in P3F versus P7F |
| cg02612397 | 0.522    | 0.210    | 0.312     | 0.003            | NA                    | Hypermethylated in P3F versus P7F |
| cg15970457 | 0.608    | 0.333    | 0.276     | 0.004            | NA                    | Hypermethylated in P3F versus P7F |
| cg07014673 | 0.662    | 0.292    | 0.370     | 0.004            | NA                    | Hypermethylated in P3F versus P7F |
| cg15852891 | 0.559    | 0.256    | 0.303     | 0.004            | OTP                   | Hypermethylated in P3F versus P7F |
| cg22729681 | 0.598    | 0.330    | 0.269     | 0.004            | NA                    | Hypermethylated in P3F versus P7F |
| cg25573884 | 0.815    | 0.547    | 0.268     | 0.004            | NA                    | Hypermethylated in P3F versus P7F |
| cg25694349 | 0.708    | 0.354    | 0.354     | 0.004            | FBRSL1                | Hypermethylated in P3F versus P7F |
| cg00078085 | 0.597    | 0.300    | 0.297     | 0.004            | NA                    | Hypermethylated in P3F versus P7F |
| cg15205428 | 0.597    | 0.318    | 0.279     | 0.004            | NA                    | Hypermethylated in P3F versus P7F |
| cg23422170 | 0.697    | 0.389    | 0.308     | 0.004            | NA                    | Hypermethylated in P3F versus P7F |
| cg06174989 | 0.700    | 0.447    | 0.253     | 0.004            | LOC100130015          | Hypermethylated in P3F versus P7F |
| cg14328115 | 0.699    | 0.422    | 0.278     | 0.004            | NA                    | Hypermethylated in P3F versus P7F |
| cg21413492 | 0.492    | 0.219    | 0.273     | 0.004            | NA                    | Hypermethylated in P3F versus P7F |
| cg09257635 | 0.861    | 0.536    | 0.325     | 0.004            | NA                    | Hypermethylated in P3F versus P7F |
| cg13882284 | 0.755    | 0.498    | 0.257     | 0.004            | MSX1                  | Hypermethylated in P3F versus P7F |
| cg10596361 | 0.819    | 0.541    | 0.279     | 0.004            | NA                    | Hypermethylated in P3F versus P7F |
| cg05571310 | 0.656    | 0.386    | 0.270     | 0.004            | NA                    | Hypermethylated in P3F versus P7F |
| cg19089328 | 0.772    | 0.521    | 0.251     | 0.004            | NA                    | Hypermethylated in P3F versus P7F |
| cg16314543 | 0.457    | 0.187    | 0.270     | 0.004            | NA                    | Hypermethylated in P3F versus P7F |
| cg17468773 | 0.523    | 0.170    | 0.353     | 0.004            | NA                    | Hypermethylated in P3F versus P7F |
| cg13533616 | 0.692    | 0.360    | 0.332     | 0.004            | NA                    | Hypermethylated in P3F versus P7F |
| cg02486421 | 0.636    | 0.381    | 0.256     | 0.004            | NA                    | Hypermethylated in P3F versus P7F |
| cg17245135 | 0.738    | 0.455    | 0.283     | 0.004            | NA                    | Hypermethylated in P3F versus P7F |

### Supplementary Table 3 (continued)

| Probe      | P3F.mean | P7F.mean | Mean.diff | Adjusted.P.value | Promoter.related.gene | Category                          |
|------------|----------|----------|-----------|------------------|-----------------------|-----------------------------------|
| cg07470512 | 0.519    | 0.153    | 0.366     | 0.004            | C20orf134             | Hypermethylated in P3F versus P7F |
| cg27068206 | 0.817    | 0.507    | 0.310     | 0.004            | NA                    | Hypermethylated in P3F versus P7F |
| cg25561875 | 0.650    | 0.357    | 0.292     | 0.004            | NA                    | Hypermethylated in P3F versus P7F |
| cg12757143 | 0.668    | 0.397    | 0.271     | 0.004            | WDR85                 | Hypermethylated in P3F versus P7F |
| cg04288999 | 0.513    | 0.196    | 0.317     | 0.004            | NA                    | Hypermethylated in P3F versus P7F |
| cg27000590 | 0.587    | 0.304    | 0.282     | 0.004            | NA                    | Hypermethylated in P3F versus P7F |
| cg26668713 | 0.534    | 0.240    | 0.294     | 0.004            | NA                    | Hypermethylated in P3F versus P7F |
| cg11372436 | 0.639    | 0.324    | 0.315     | 0.004            | SOD3                  | Hypermethylated in P3F versus P7F |
| cg16413428 | 0.772    | 0.469    | 0.303     | 0.004            | NA                    | Hypermethylated in P3F versus P7F |
| cg21207730 | 0.564    | 0.263    | 0.301     | 0.004            | NA                    | Hypermethylated in P3F versus P7F |
| cg26581714 | 0.616    | 0.251    | 0.364     | 0.004            | NA                    | Hypermethylated in P3F versus P7F |
| cg21269843 | 0.480    | 0.214    | 0.267     | 0.004            | OTP                   | Hypermethylated in P3F versus P7F |
| cg16501237 | 0.580    | 0.294    | 0.286     | 0.004            | FRAT1                 | Hypermethylated in P3F versus P7F |
| cg25455598 | 0.372    | 0.056    | 0.316     | 0.004            | PGAP2                 | Hypermethylated in P3F versus P7F |
| cg27245348 | 0.672    | 0.417    | 0.255     | 0.004            | NA                    | Hypermethylated in P3F versus P7F |
| cg09968723 | 0.678    | 0.328    | 0.350     | 0.004            | BAI1                  | Hypermethylated in P3F versus P7F |
| cg23503775 | 0.514    | 0.254    | 0.260     | 0.004            | SCML4                 | Hypermethylated in P3F versus P7F |
| cg05296608 | 0.657    | 0.380    | 0.276     | 0.004            | NA                    | Hypermethylated in P3F versus P7F |
| cg17945976 | 0.599    | 0.201    | 0.398     | 0.004            | NA                    | Hypermethylated in P3F versus P7F |
| cg08499046 | 0.742    | 0.466    | 0.276     | 0.004            | NA                    | Hypermethylated in P3F versus P7F |
| cg15901594 | 0.629    | 0.348    | 0.281     | 0.004            | NA                    | Hypermethylated in P3F versus P7F |
| cg11792874 | 0.551    | 0.285    | 0.266     | 0.004            | NA                    | Hypermethylated in P3F versus P7F |
| cg04603812 | 0.495    | 0.183    | 0.312     | 0.004            | NA                    | Hypermethylated in P3F versus P7F |
| cg17107572 | 0.625    | 0.216    | 0.409     | 0.004            | NA                    | Hypermethylated in P3F versus P7F |
| cg08547691 | 0.399    | 0.090    | 0.309     | 0.004            | NA                    | Hypermethylated in P3F versus P7F |

### Supplementary Table 3 (continued)

| Probe      | P3F.mean | P7F.mean | Mean.diff | Adjusted.P.value | Promoter.related.gene | Category                          |
|------------|----------|----------|-----------|------------------|-----------------------|-----------------------------------|
| cg08969912 | 0.358    | 0.052    | 0.307     | 0.004            | NA                    | Hypermethylated in P3F versus P7F |
| cg15261665 | 0.633    | 0.302    | 0.331     | 0.004            | LTF                   | Hypermethylated in P3F versus P7F |
| cg08061360 | 0.633    | 0.247    | 0.385     | 0.004            | LOC100129083          | Hypermethylated in P3F versus P7F |
| cg10571987 | 0.660    | 0.284    | 0.377     | 0.004            | NA                    | Hypermethylated in P3F versus P7F |
| cg15443791 | 0.747    | 0.467    | 0.280     | 0.004            | NA                    | Hypermethylated in P3F versus P7F |
| cg09663111 | 0.603    | 0.297    | 0.306     | 0.004            | C20orf85              | Hypermethylated in P3F versus P7F |
| cg01562537 | 0.653    | 0.327    | 0.326     | 0.004            | NA                    | Hypermethylated in P3F versus P7F |
| cg17796960 | 0.522    | 0.228    | 0.294     | 0.004            | NA                    | Hypermethylated in P3F versus P7F |
| cg08189043 | 0.762    | 0.507    | 0.255     | 0.004            | NA                    | Hypermethylated in P3F versus P7F |
| cg14774086 | 0.596    | 0.207    | 0.389     | 0.004            | DERL3                 | Hypermethylated in P3F versus P7F |
| cg07429146 | 0.697    | 0.315    | 0.382     | 0.004            | NA                    | Hypermethylated in P3F versus P7F |
| cg10997906 | 0.615    | 0.359    | 0.256     | 0.004            | NA                    | Hypermethylated in P3F versus P7F |
| cg09342325 | 0.804    | 0.551    | 0.253     | 0.004            | NA                    | Hypermethylated in P3F versus P7F |
| cg07124117 | 0.739    | 0.489    | 0.250     | 0.004            | NA                    | Hypermethylated in P3F versus P7F |
| cg26221801 | 0.619    | 0.322    | 0.297     | 0.004            | C20orf195             | Hypermethylated in P3F versus P7F |
| cg14620572 | 0.518    | 0.214    | 0.305     | 0.004            | NA                    | Hypermethylated in P3F versus P7F |
| cg06263178 | 0.773    | 0.484    | 0.289     | 0.004            | NA                    | Hypermethylated in P3F versus P7F |
| cg07465275 | 0.558    | 0.231    | 0.327     | 0.004            | NA                    | Hypermethylated in P3F versus P7F |
| cg23453372 | 0.577    | 0.260    | 0.317     | 0.004            | NA                    | Hypermethylated in P3F versus P7F |
| cg27241808 | 0.557    | 0.164    | 0.394     | 0.004            | NA                    | Hypermethylated in P3F versus P7F |
| cg09340279 | 0.776    | 0.475    | 0.301     | 0.004            | NA                    | Hypermethylated in P3F versus P7F |
| cg22108469 | 0.650    | 0.257    | 0.393     | 0.004            | NA                    | Hypermethylated in P3F versus P7F |
| cg13170728 | 0.677    | 0.388    | 0.289     | 0.004            | NA                    | Hypermethylated in P3F versus P7F |
| cg01655150 | 0.483    | 0.222    | 0.261     | 0.004            | ZXDC                  | Hypermethylated in P3F versus P7F |
| cg11817999 | 0.470    | 0.178    | 0.292     | 0.004            | NA                    | Hypermethylated in P3F versus P7F |

### Supplementary Table 3 (continued)

| Probe      | P3F.mean | P7F.mean | Mean.diff | Adjusted.P.value | Promoter.related.gene | Category                          |
|------------|----------|----------|-----------|------------------|-----------------------|-----------------------------------|
| cg07139330 | 0.532    | 0.189    | 0.344     | 0.004            | NA                    | Hypermethylated in P3F versus P7F |
| cg03714522 | 0.585    | 0.239    | 0.346     | 0.004            | NA                    | Hypermethylated in P3F versus P7F |
| cg00890145 | 0.713    | 0.440    | 0.273     | 0.004            | NA                    | Hypermethylated in P3F versus P7F |
| cg12924899 | 0.732    | 0.402    | 0.329     | 0.004            | NA                    | Hypermethylated in P3F versus P7F |
| cg24415941 | 0.421    | 0.111    | 0.310     | 0.004            | CD3EAP_PPP1R13L       | Hypermethylated in P3F versus P7F |
| cg01784220 | 0.546    | 0.272    | 0.275     | 0.004            | MFHAS1                | Hypermethylated in P3F versus P7F |
| cg22409504 | 0.751    | 0.493    | 0.259     | 0.004            | NA                    | Hypermethylated in P3F versus P7F |
| cg01640437 | 0.393    | 0.106    | 0.286     | 0.004            | SIPA1                 | Hypermethylated in P3F versus P7F |
| cg19250101 | 0.380    | 0.124    | 0.255     | 0.004            | NA                    | Hypermethylated in P3F versus P7F |
| cg02412399 | 0.534    | 0.259    | 0.275     | 0.004            | NA                    | Hypermethylated in P3F versus P7F |
| cg05639246 | 0.589    | 0.294    | 0.295     | 0.004            | NA                    | Hypermethylated in P3F versus P7F |
| cg24426691 | 0.655    | 0.369    | 0.287     | 0.004            | CLDN10                | Hypermethylated in P3F versus P7F |
| cg11699334 | 0.600    | 0.259    | 0.341     | 0.004            | NA                    | Hypermethylated in P3F versus P7F |
| cg20584732 | 0.614    | 0.354    | 0.260     | 0.004            | NA                    | Hypermethylated in P3F versus P7F |
| cg00928795 | 0.617    | 0.347    | 0.270     | 0.004            | NA                    | Hypermethylated in P3F versus P7F |
| cg02182210 | 0.568    | 0.200    | 0.368     | 0.004            | NA                    | Hypermethylated in P3F versus P7F |
| cg00814909 | 0.811    | 0.540    | 0.270     | 0.004            | NA                    | Hypermethylated in P3F versus P7F |
| cg25985959 | 0.684    | 0.422    | 0.262     | 0.004            | NA                    | Hypermethylated in P3F versus P7F |
| cg03672274 | 0.679    | 0.380    | 0.299     | 0.004            | MSX1                  | Hypermethylated in P3F versus P7F |
| cg02449166 | 0.718    | 0.449    | 0.269     | 0.004            | NA                    | Hypermethylated in P3F versus P7F |
| cg19581963 | 0.653    | 0.371    | 0.282     | 0.004            | NA                    | Hypermethylated in P3F versus P7F |
| cg19392656 | 0.470    | 0.178    | 0.292     | 0.004            | FBLN2                 | Hypermethylated in P3F versus P7F |
| cg12700788 | 0.598    | 0.346    | 0.252     | 0.004            | NA                    | Hypermethylated in P3F versus P7F |
| cg03870188 | 0.762    | 0.444    | 0.318     | 0.004            | NA                    | Hypermethylated in P3F versus P7F |
| cg16676413 | 0.566    | 0.307    | 0.259     | 0.004            | NA                    | Hypermethylated in P3F versus P7F |



### Supplementary Table 3 (continued)

| Probe      | P3F.mean | P7F.mean | Mean.diff | Adjusted.P.value | Promoter.related.gene | Category                          |
|------------|----------|----------|-----------|------------------|-----------------------|-----------------------------------|
| cg05282518 | 0.617    | 0.323    | 0.294     | 0.004            | OR4K2                 | Hypermethylated in P3F versus P7F |
| cg04928129 | 0.521    | 0.227    | 0.294     | 0.004            | NA                    | Hypermethylated in P3F versus P7F |
| cg24771349 | 0.574    | 0.217    | 0.357     | 0.004            | NA                    | Hypermethylated in P3F versus P7F |
| cg26124968 | 0.816    | 0.496    | 0.320     | 0.004            | NA                    | Hypermethylated in P3F versus P7F |
| cg24000241 | 0.736    | 0.458    | 0.278     | 0.004            | NA                    | Hypermethylated in P3F versus P7F |
| cg10290724 | 0.398    | 0.094    | 0.305     | 0.004            | NA                    | Hypermethylated in P3F versus P7F |
| cg11248812 | 0.681    | 0.326    | 0.354     | 0.004            | NA                    | Hypermethylated in P3F versus P7F |
| cg09642857 | 0.787    | 0.521    | 0.266     | 0.004            | NA                    | Hypermethylated in P3F versus P7F |
| cg02199826 | 0.695    | 0.438    | 0.257     | 0.004            | NA                    | Hypermethylated in P3F versus P7F |
| cg03401480 | 0.817    | 0.566    | 0.251     | 0.004            | NA                    | Hypermethylated in P3F versus P7F |
| cg19684083 | 0.601    | 0.331    | 0.270     | 0.004            | LNK1                  | Hypermethylated in P3F versus P7F |
| cg06094607 | 0.654    | 0.378    | 0.277     | 0.004            | NA                    | Hypermethylated in P3F versus P7F |
| cg10483660 | 0.669    | 0.389    | 0.280     | 0.004            | NA                    | Hypermethylated in P3F versus P7F |
| cg06546806 | 0.596    | 0.235    | 0.361     | 0.004            | NA                    | Hypermethylated in P3F versus P7F |
| cg22557091 | 0.705    | 0.407    | 0.298     | 0.004            | NA                    | Hypermethylated in P3F versus P7F |
| cg13912311 | 0.486    | 0.178    | 0.308     | 0.004            | NA                    | Hypermethylated in P3F versus P7F |
| cg05598246 | 0.620    | 0.350    | 0.271     | 0.004            | MOG                   | Hypermethylated in P3F versus P7F |
| cg03710889 | 0.570    | 0.302    | 0.268     | 0.004            | NA                    | Hypermethylated in P3F versus P7F |
| cg17489690 | 0.763    | 0.438    | 0.326     | 0.004            | NA                    | Hypermethylated in P3F versus P7F |
| cg05952572 | 0.629    | 0.283    | 0.346     | 0.004            | NA                    | Hypermethylated in P3F versus P7F |
| cg15205204 | 0.426    | 0.133    | 0.293     | 0.004            | NA                    | Hypermethylated in P3F versus P7F |
| cg00298065 | 0.737    | 0.433    | 0.304     | 0.004            | NA                    | Hypermethylated in P3F versus P7F |
| cg20910408 | 0.786    | 0.444    | 0.342     | 0.004            | NA                    | Hypermethylated in P3F versus P7F |
| cg22461434 | 0.741    | 0.488    | 0.253     | 0.004            | NA                    | Hypermethylated in P3F versus P7F |
| cg12673726 | 0.571    | 0.286    | 0.285     | 0.004            | NA                    | Hypermethylated in P3F versus P7F |

### Supplementary Table 3 (continued)

| Probe      | P3F.mean | P7F.mean | Mean.diff | Adjusted.P.value | Promoter.related.gene | Category                          |
|------------|----------|----------|-----------|------------------|-----------------------|-----------------------------------|
| cg05877497 | 0.617    | 0.223    | 0.393     | 0.004            | NA                    | Hypermethylated in P3F versus P7F |
| cg22507023 | 0.556    | 0.270    | 0.285     | 0.004            | NA                    | Hypermethylated in P3F versus P7F |
| cg03765423 | 0.638    | 0.385    | 0.253     | 0.004            | NA                    | Hypermethylated in P3F versus P7F |
| cg09832102 | 0.679    | 0.331    | 0.348     | 0.004            | NA                    | Hypermethylated in P3F versus P7F |
| cg08906309 | 0.701    | 0.433    | 0.268     | 0.005            | NA                    | Hypermethylated in P3F versus P7F |
| cg00582671 | 0.760    | 0.482    | 0.278     | 0.005            | NA                    | Hypermethylated in P3F versus P7F |
| cg26537478 | 0.573    | 0.202    | 0.370     | 0.005            | NA                    | Hypermethylated in P3F versus P7F |
| cg23244910 | 0.365    | 0.062    | 0.303     | 0.005            | NA                    | Hypermethylated in P3F versus P7F |
| cg13247581 | 0.465    | 0.123    | 0.342     | 0.005            | ENTPD2                | Hypermethylated in P3F versus P7F |
| cg14666946 | 0.660    | 0.359    | 0.301     | 0.005            | NA                    | Hypermethylated in P3F versus P7F |
| cg07173049 | 0.693    | 0.403    | 0.290     | 0.005            | NA                    | Hypermethylated in P3F versus P7F |
| cg22784260 | 0.680    | 0.418    | 0.262     | 0.005            | NA                    | Hypermethylated in P3F versus P7F |
| cg22533317 | 0.572    | 0.322    | 0.250     | 0.005            | NA                    | Hypermethylated in P3F versus P7F |
| cg04447981 | 0.562    | 0.282    | 0.281     | 0.005            | SIPA1                 | Hypermethylated in P3F versus P7F |
| cg12507655 | 0.505    | 0.171    | 0.333     | 0.005            | TRIP6                 | Hypermethylated in P3F versus P7F |
| cg08886020 | 0.772    | 0.504    | 0.268     | 0.005            | NA                    | Hypermethylated in P3F versus P7F |
| cg24369989 | 0.537    | 0.266    | 0.271     | 0.005            | CHRNA4                | Hypermethylated in P3F versus P7F |
| cg26569771 | 0.690    | 0.417    | 0.273     | 0.005            | NA                    | Hypermethylated in P3F versus P7F |
| cg20935363 | 0.631    | 0.309    | 0.323     | 0.005            | NA                    | Hypermethylated in P3F versus P7F |
| cg02940164 | 0.520    | 0.203    | 0.317     | 0.005            | NA                    | Hypermethylated in P3F versus P7F |
| cg10705379 | 0.553    | 0.233    | 0.320     | 0.005            | FRAT1                 | Hypermethylated in P3F versus P7F |
| cg08718490 | 0.573    | 0.189    | 0.384     | 0.005            | NA                    | Hypermethylated in P3F versus P7F |
| cg05450805 | 0.464    | 0.214    | 0.250     | 0.005            | NA                    | Hypermethylated in P3F versus P7F |
| cg16312968 | 0.687    | 0.427    | 0.260     | 0.005            | NA                    | Hypermethylated in P3F versus P7F |
| cg08691358 | 0.773    | 0.483    | 0.290     | 0.005            | NA                    | Hypermethylated in P3F versus P7F |

### Supplementary Table 3 (continued)

| Probe      | P3F.mean | P7F.mean | Mean.diff | Adjusted.P.value | Promoter.related.gene | Category                          |
|------------|----------|----------|-----------|------------------|-----------------------|-----------------------------------|
| cg09199014 | 0.679    | 0.427    | 0.252     | 0.005            | NA                    | Hypermethylated in P3F versus P7F |
| cg10400652 | 0.685    | 0.364    | 0.321     | 0.005            | PNMAL2                | Hypermethylated in P3F versus P7F |
| cg05671758 | 0.636    | 0.376    | 0.261     | 0.005            | NA                    | Hypermethylated in P3F versus P7F |
| cg23439460 | 0.554    | 0.248    | 0.306     | 0.005            | NA                    | Hypermethylated in P3F versus P7F |
| cg15614730 | 0.745    | 0.470    | 0.276     | 0.005            | NA                    | Hypermethylated in P3F versus P7F |
| cg05191879 | 0.564    | 0.292    | 0.272     | 0.005            | NA                    | Hypermethylated in P3F versus P7F |
| cg05219493 | 0.745    | 0.454    | 0.291     | 0.005            | CYP26C1               | Hypermethylated in P3F versus P7F |
| cg08991927 | 0.536    | 0.270    | 0.266     | 0.005            | PPP2R2B               | Hypermethylated in P3F versus P7F |
| cg20973210 | 0.594    | 0.318    | 0.276     | 0.005            | C19orf35              | Hypermethylated in P3F versus P7F |
| cg01239928 | 0.700    | 0.391    | 0.308     | 0.005            | MFHAS1                | Hypermethylated in P3F versus P7F |
| cg18066182 | 0.713    | 0.457    | 0.256     | 0.005            | NA                    | Hypermethylated in P3F versus P7F |
| cg19074393 | 0.720    | 0.462    | 0.259     | 0.005            | NA                    | Hypermethylated in P3F versus P7F |
| cg01422274 | 0.556    | 0.232    | 0.324     | 0.005            | NA                    | Hypermethylated in P3F versus P7F |
| cg02709139 | 0.719    | 0.466    | 0.254     | 0.005            | NA                    | Hypermethylated in P3F versus P7F |
| cg25940946 | 0.545    | 0.186    | 0.360     | 0.005            | DERL3                 | Hypermethylated in P3F versus P7F |
| cg26789064 | 0.636    | 0.340    | 0.297     | 0.005            | NA                    | Hypermethylated in P3F versus P7F |
| cg24737374 | 0.605    | 0.287    | 0.317     | 0.005            | NA                    | Hypermethylated in P3F versus P7F |
| cg05978306 | 0.671    | 0.398    | 0.273     | 0.005            | NA                    | Hypermethylated in P3F versus P7F |
| cg18011099 | 0.648    | 0.314    | 0.335     | 0.005            | NA                    | Hypermethylated in P3F versus P7F |
| cg22967396 | 0.712    | 0.425    | 0.287     | 0.005            | NA                    | Hypermethylated in P3F versus P7F |
| cg01662869 | 0.637    | 0.339    | 0.297     | 0.005            | NA                    | Hypermethylated in P3F versus P7F |
| cg01296230 | 0.819    | 0.568    | 0.251     | 0.005            | NA                    | Hypermethylated in P3F versus P7F |
| cg09098522 | 0.698    | 0.434    | 0.264     | 0.005            | NA                    | Hypermethylated in P3F versus P7F |
| cg03650119 | 0.878    | 0.564    | 0.314     | 0.005            | NA                    | Hypermethylated in P3F versus P7F |
| cg24395452 | 0.546    | 0.208    | 0.339     | 0.005            | NA                    | Hypermethylated in P3F versus P7F |

### Supplementary Table 3 (continued)

| Probe      | P3F.mean | P7F.mean | Mean.diff | Adjusted.P.value | Promoter.related.gene | Category                          |
|------------|----------|----------|-----------|------------------|-----------------------|-----------------------------------|
| cg15211864 | 0.649    | 0.390    | 0.259     | 0.005            | NA                    | Hypermethylated in P3F versus P7F |
| cg00498816 | 0.592    | 0.286    | 0.306     | 0.005            | NA                    | Hypermethylated in P3F versus P7F |
| cg27340749 | 0.523    | 0.255    | 0.268     | 0.005            | TREX1                 | Hypermethylated in P3F versus P7F |
| cg25147632 | 0.696    | 0.442    | 0.254     | 0.005            | NA                    | Hypermethylated in P3F versus P7F |
| cg07794300 | 0.523    | 0.166    | 0.357     | 0.005            | NA                    | Hypermethylated in P3F versus P7F |
| cg02190350 | 0.607    | 0.275    | 0.332     | 0.005            | NA                    | Hypermethylated in P3F versus P7F |
| cg04652621 | 0.534    | 0.183    | 0.351     | 0.005            | NA                    | Hypermethylated in P3F versus P7F |
| cg00337466 | 0.460    | 0.188    | 0.272     | 0.005            | ADAM8                 | Hypermethylated in P3F versus P7F |
| cg23418339 | 0.618    | 0.278    | 0.340     | 0.005            | NA                    | Hypermethylated in P3F versus P7F |
| cg17018517 | 0.642    | 0.362    | 0.280     | 0.005            | NA                    | Hypermethylated in P3F versus P7F |
| cg13768290 | 0.396    | 0.143    | 0.252     | 0.005            | NA                    | Hypermethylated in P3F versus P7F |
| cg20509869 | 0.767    | 0.428    | 0.340     | 0.005            | NA                    | Hypermethylated in P3F versus P7F |
| cg23424933 | 0.565    | 0.242    | 0.322     | 0.005            | NA                    | Hypermethylated in P3F versus P7F |
| cg15488963 | 0.504    | 0.238    | 0.265     | 0.005            | NA                    | Hypermethylated in P3F versus P7F |
| cg15666214 | 0.480    | 0.167    | 0.314     | 0.005            | NA                    | Hypermethylated in P3F versus P7F |
| cg15402627 | 0.587    | 0.300    | 0.286     | 0.005            | NA                    | Hypermethylated in P3F versus P7F |
| cg13701954 | 0.667    | 0.371    | 0.296     | 0.005            | NA                    | Hypermethylated in P3F versus P7F |
| cg03834286 | 0.645    | 0.333    | 0.313     | 0.005            | NA                    | Hypermethylated in P3F versus P7F |
| cg08600862 | 0.673    | 0.412    | 0.261     | 0.005            | NA                    | Hypermethylated in P3F versus P7F |
| cg25435917 | 0.439    | 0.186    | 0.253     | 0.005            | NA                    | Hypermethylated in P3F versus P7F |
| cg07919108 | 0.537    | 0.143    | 0.394     | 0.005            | NA                    | Hypermethylated in P3F versus P7F |
| cg25570864 | 0.665    | 0.377    | 0.288     | 0.005            | NA                    | Hypermethylated in P3F versus P7F |
| cg04226256 | 0.834    | 0.550    | 0.283     | 0.005            | NA                    | Hypermethylated in P3F versus P7F |
| cg05457480 | 0.617    | 0.358    | 0.259     | 0.005            | NA                    | Hypermethylated in P3F versus P7F |
| cg18849102 | 0.667    | 0.387    | 0.280     | 0.005            | MSX1                  | Hypermethylated in P3F versus P7F |

### Supplementary Table 3 (continued)

| Probe      | P3F.mean | P7F.mean | Mean.diff | Adjusted.P.value | Promoter.related.gene | Category                          |
|------------|----------|----------|-----------|------------------|-----------------------|-----------------------------------|
| cg10287321 | 0.614    | 0.352    | 0.262     | 0.005            | NA                    | Hypermethylated in P3F versus P7F |
| cg03593189 | 0.738    | 0.480    | 0.257     | 0.005            | NA                    | Hypermethylated in P3F versus P7F |
| cg01685242 | 0.463    | 0.123    | 0.339     | 0.006            | NA                    | Hypermethylated in P3F versus P7F |
| cg09177106 | 0.537    | 0.195    | 0.342     | 0.006            | NA                    | Hypermethylated in P3F versus P7F |
| cg27317046 | 0.615    | 0.257    | 0.358     | 0.006            | NA                    | Hypermethylated in P3F versus P7F |
| cg00009196 | 0.614    | 0.356    | 0.258     | 0.006            | NA                    | Hypermethylated in P3F versus P7F |
| cg15243034 | 0.603    | 0.315    | 0.287     | 0.006            | NA                    | Hypermethylated in P3F versus P7F |
| cg16615829 | 0.627    | 0.359    | 0.268     | 0.006            | NA                    | Hypermethylated in P3F versus P7F |
| cg14166053 | 0.724    | 0.445    | 0.278     | 0.006            | ACCN4                 | Hypermethylated in P3F versus P7F |
| cg07192240 | 0.465    | 0.160    | 0.305     | 0.006            | PGAP2                 | Hypermethylated in P3F versus P7F |
| cg00131983 | 0.368    | 0.068    | 0.299     | 0.006            | NA                    | Hypermethylated in P3F versus P7F |
| cg10389454 | 0.639    | 0.346    | 0.294     | 0.006            | NA                    | Hypermethylated in P3F versus P7F |
| cg03910652 | 0.408    | 0.087    | 0.321     | 0.006            | NA                    | Hypermethylated in P3F versus P7F |
| cg12150039 | 0.621    | 0.348    | 0.272     | 0.006            | GRAMD1A               | Hypermethylated in P3F versus P7F |
| cg01648609 | 0.700    | 0.437    | 0.262     | 0.006            | NA                    | Hypermethylated in P3F versus P7F |
| cg23972738 | 0.666    | 0.288    | 0.377     | 0.006            | NA                    | Hypermethylated in P3F versus P7F |
| cg08262464 | 0.742    | 0.477    | 0.265     | 0.006            | NA                    | Hypermethylated in P3F versus P7F |
| cg24407133 | 0.739    | 0.470    | 0.269     | 0.006            | NA                    | Hypermethylated in P3F versus P7F |
| cg25660386 | 0.372    | 0.105    | 0.267     | 0.006            | IQSEC1                | Hypermethylated in P3F versus P7F |
| cg12328660 | 0.544    | 0.266    | 0.278     | 0.006            | NA                    | Hypermethylated in P3F versus P7F |
| cg14252279 | 0.434    | 0.142    | 0.292     | 0.006            | NA                    | Hypermethylated in P3F versus P7F |
| cg01552272 | 0.354    | 0.102    | 0.252     | 0.006            | MACROD2               | Hypermethylated in P3F versus P7F |
| cg24738592 | 0.479    | 0.140    | 0.339     | 0.006            | NA                    | Hypermethylated in P3F versus P7F |
| cg06719391 | 0.373    | 0.120    | 0.253     | 0.006            | NA                    | Hypermethylated in P3F versus P7F |
| cg07810961 | 0.332    | 0.052    | 0.281     | 0.006            | EIF4EBP3              | Hypermethylated in P3F versus P7F |

### Supplementary Table 3 (continued)

| Probe      | P3F.mean | P7F.mean | Mean.diff | Adjusted.P.value | Promoter.related.gene | Category                          |
|------------|----------|----------|-----------|------------------|-----------------------|-----------------------------------|
| cg13596833 | 0.697    | 0.401    | 0.296     | 0.006            | NA                    | Hypermethylated in P3F versus P7F |
| cg03341413 | 0.738    | 0.477    | 0.261     | 0.006            | NA                    | Hypermethylated in P3F versus P7F |
| cg13418804 | 0.758    | 0.371    | 0.388     | 0.006            | NA                    | Hypermethylated in P3F versus P7F |
| cg06415891 | 0.617    | 0.348    | 0.269     | 0.006            | NA                    | Hypermethylated in P3F versus P7F |
| cg02450725 | 0.817    | 0.489    | 0.328     | 0.006            | NA                    | Hypermethylated in P3F versus P7F |
| cg18108716 | 0.528    | 0.143    | 0.385     | 0.006            | NA                    | Hypermethylated in P3F versus P7F |
| cg15934776 | 0.785    | 0.532    | 0.253     | 0.006            | NA                    | Hypermethylated in P3F versus P7F |
| cg08198983 | 0.681    | 0.390    | 0.291     | 0.006            | NA                    | Hypermethylated in P3F versus P7F |
| cg10784570 | 0.666    | 0.252    | 0.413     | 0.006            | NA                    | Hypermethylated in P3F versus P7F |
| cg10831607 | 0.583    | 0.251    | 0.332     | 0.006            | NA                    | Hypermethylated in P3F versus P7F |
| cg00411413 | 0.719    | 0.453    | 0.266     | 0.006            | NA                    | Hypermethylated in P3F versus P7F |
| cg20709110 | 0.698    | 0.426    | 0.272     | 0.006            | NA                    | Hypermethylated in P3F versus P7F |
| cg02168584 | 0.559    | 0.279    | 0.280     | 0.006            | NA                    | Hypermethylated in P3F versus P7F |
| cg20636352 | 0.676    | 0.363    | 0.313     | 0.006            | NA                    | Hypermethylated in P3F versus P7F |
| cg01811583 | 0.519    | 0.243    | 0.276     | 0.006            | NA                    | Hypermethylated in P3F versus P7F |
| cg13505608 | 0.594    | 0.298    | 0.296     | 0.006            | NA                    | Hypermethylated in P3F versus P7F |
| cg15616310 | 0.668    | 0.318    | 0.350     | 0.006            | NA                    | Hypermethylated in P3F versus P7F |
| cg18717167 | 0.679    | 0.325    | 0.354     | 0.006            | NA                    | Hypermethylated in P3F versus P7F |
| cg25780607 | 0.460    | 0.164    | 0.297     | 0.006            | ARSI                  | Hypermethylated in P3F versus P7F |
| cg12499235 | 0.725    | 0.404    | 0.320     | 0.006            | ASCL2                 | Hypermethylated in P3F versus P7F |
| cg16178603 | 0.572    | 0.175    | 0.397     | 0.006            | NA                    | Hypermethylated in P3F versus P7F |
| cg26964426 | 0.760    | 0.446    | 0.314     | 0.006            | NA                    | Hypermethylated in P3F versus P7F |
| cg25362652 | 0.580    | 0.283    | 0.297     | 0.006            | NA                    | Hypermethylated in P3F versus P7F |
| cg19811337 | 0.483    | 0.130    | 0.353     | 0.006            | NA                    | Hypermethylated in P3F versus P7F |
| cg14239592 | 0.822    | 0.568    | 0.254     | 0.006            | NA                    | Hypermethylated in P3F versus P7F |

### Supplementary Table 3 (continued)

| Probe      | P3F.mean | P7F.mean | Mean.diff | Adjusted.P.value | Promoter.related.gene | Category                          |
|------------|----------|----------|-----------|------------------|-----------------------|-----------------------------------|
| cg15336765 | 0.513    | 0.161    | 0.352     | 0.006            | AQP5                  | Hypermethylated in P3F versus P7F |
| cg14991769 | 0.458    | 0.164    | 0.294     | 0.006            | TMEM176B_TMEM176A     | Hypermethylated in P3F versus P7F |
| cg14232082 | 0.509    | 0.248    | 0.261     | 0.006            | NA                    | Hypermethylated in P3F versus P7F |
| cg00713567 | 0.778    | 0.505    | 0.274     | 0.006            | BAI1                  | Hypermethylated in P3F versus P7F |
| cg09788586 | 0.603    | 0.276    | 0.327     | 0.006            | NA                    | Hypermethylated in P3F versus P7F |
| cg15054725 | 0.722    | 0.425    | 0.297     | 0.006            | NA                    | Hypermethylated in P3F versus P7F |
| cg00086488 | 0.594    | 0.273    | 0.321     | 0.006            | NA                    | Hypermethylated in P3F versus P7F |
| cg18571590 | 0.722    | 0.436    | 0.286     | 0.006            | NA                    | Hypermethylated in P3F versus P7F |
| cg15247144 | 0.443    | 0.175    | 0.267     | 0.006            | NA                    | Hypermethylated in P3F versus P7F |
| cg08234689 | 0.760    | 0.455    | 0.304     | 0.006            | NA                    | Hypermethylated in P3F versus P7F |
| cg18523979 | 0.486    | 0.148    | 0.338     | 0.006            | IQSEC1                | Hypermethylated in P3F versus P7F |
| cg15962744 | 0.712    | 0.428    | 0.284     | 0.006            | NA                    | Hypermethylated in P3F versus P7F |
| cg03163184 | 0.719    | 0.440    | 0.279     | 0.006            | NA                    | Hypermethylated in P3F versus P7F |
| cg00480331 | 0.655    | 0.288    | 0.367     | 0.006            | BCL6                  | Hypermethylated in P3F versus P7F |
| cg02406096 | 0.807    | 0.555    | 0.253     | 0.006            | NA                    | Hypermethylated in P3F versus P7F |
| cg06271696 | 0.654    | 0.395    | 0.259     | 0.006            | NA                    | Hypermethylated in P3F versus P7F |
| cg05583608 | 0.523    | 0.179    | 0.344     | 0.006            | NA                    | Hypermethylated in P3F versus P7F |
| cg22879667 | 0.423    | 0.119    | 0.304     | 0.006            | NA                    | Hypermethylated in P3F versus P7F |
| cg17183432 | 0.550    | 0.182    | 0.368     | 0.006            | NA                    | Hypermethylated in P3F versus P7F |
| cg16691593 | 0.539    | 0.233    | 0.306     | 0.006            | OTP                   | Hypermethylated in P3F versus P7F |
| cg16909962 | 0.445    | 0.134    | 0.311     | 0.006            | RAB4A                 | Hypermethylated in P3F versus P7F |
| cg16608596 | 0.780    | 0.509    | 0.271     | 0.006            | NA                    | Hypermethylated in P3F versus P7F |
| cg09474229 | 0.794    | 0.533    | 0.261     | 0.006            | NA                    | Hypermethylated in P3F versus P7F |
| cg20640373 | 0.479    | 0.164    | 0.315     | 0.006            | NA                    | Hypermethylated in P3F versus P7F |
| cg04541670 | 0.639    | 0.354    | 0.285     | 0.006            | MSX2                  | Hypermethylated in P3F versus P7F |

### Supplementary Table 3 (continued)

| Probe      | P3F.mean | P7F.mean | Mean.diff | Adjusted.P.value | Promoter.related.gene | Category                          |
|------------|----------|----------|-----------|------------------|-----------------------|-----------------------------------|
| cg14100888 | 0.673    | 0.400    | 0.273     | 0.006            | NA                    | Hypermethylated in P3F versus P7F |
| cg09643136 | 0.801    | 0.504    | 0.296     | 0.006            | NA                    | Hypermethylated in P3F versus P7F |
| cg03306615 | 0.705    | 0.388    | 0.317     | 0.006            | ASCL2                 | Hypermethylated in P3F versus P7F |
| cg00863893 | 0.789    | 0.524    | 0.265     | 0.006            | NA                    | Hypermethylated in P3F versus P7F |
| cg23002238 | 0.612    | 0.358    | 0.253     | 0.006            | NA                    | Hypermethylated in P3F versus P7F |
| cg10264687 | 0.579    | 0.232    | 0.347     | 0.006            | NA                    | Hypermethylated in P3F versus P7F |
| cg10785263 | 0.755    | 0.484    | 0.271     | 0.006            | NA                    | Hypermethylated in P3F versus P7F |
| cg24830876 | 0.666    | 0.392    | 0.274     | 0.006            | ARHGEF3               | Hypermethylated in P3F versus P7F |
| cg14251267 | 0.776    | 0.485    | 0.290     | 0.007            | NA                    | Hypermethylated in P3F versus P7F |
| cg17275781 | 0.662    | 0.310    | 0.352     | 0.007            | NA                    | Hypermethylated in P3F versus P7F |
| cg05278650 | 0.511    | 0.161    | 0.350     | 0.007            | IQSEC1                | Hypermethylated in P3F versus P7F |
| cg18798289 | 0.648    | 0.355    | 0.293     | 0.007            | NA                    | Hypermethylated in P3F versus P7F |
| cg15706312 | 0.751    | 0.499    | 0.252     | 0.007            | NA                    | Hypermethylated in P3F versus P7F |
| cg12220788 | 0.651    | 0.391    | 0.260     | 0.007            | NA                    | Hypermethylated in P3F versus P7F |
| cg09409539 | 0.580    | 0.218    | 0.362     | 0.007            | NA                    | Hypermethylated in P3F versus P7F |
| cg03807298 | 0.709    | 0.282    | 0.427     | 0.007            | NA                    | Hypermethylated in P3F versus P7F |
| cg01315916 | 0.490    | 0.181    | 0.309     | 0.007            | NA                    | Hypermethylated in P3F versus P7F |
| cg04102325 | 0.557    | 0.259    | 0.299     | 0.007            | NA                    | Hypermethylated in P3F versus P7F |
| cg01870865 | 0.702    | 0.426    | 0.276     | 0.007            | TREX1                 | Hypermethylated in P3F versus P7F |
| cg23416197 | 0.612    | 0.305    | 0.306     | 0.007            | NA                    | Hypermethylated in P3F versus P7F |
| cg08513253 | 0.655    | 0.357    | 0.298     | 0.007            | NA                    | Hypermethylated in P3F versus P7F |
| cg23365801 | 0.611    | 0.234    | 0.378     | 0.007            | KCNAB3                | Hypermethylated in P3F versus P7F |
| cg01556502 | 0.519    | 0.220    | 0.299     | 0.007            | NA                    | Hypermethylated in P3F versus P7F |
| cg08557523 | 0.698    | 0.419    | 0.279     | 0.007            | ACCN4                 | Hypermethylated in P3F versus P7F |
| cg11130317 | 0.539    | 0.193    | 0.346     | 0.007            | NA                    | Hypermethylated in P3F versus P7F |



### Supplementary Table 3 (continued)

| Probe      | P3F.mean | P7F.mean | Mean.diff | Adjusted.P.value | Promoter.related.gene | Category                          |
|------------|----------|----------|-----------|------------------|-----------------------|-----------------------------------|
| cg11397854 | 0.564    | 0.232    | 0.332     | 0.007            | NA                    | Hypermethylated in P3F versus P7F |
| cg04309234 | 0.673    | 0.404    | 0.270     | 0.007            | NA                    | Hypermethylated in P3F versus P7F |
| cg09451320 | 0.679    | 0.346    | 0.333     | 0.007            | NA                    | Hypermethylated in P3F versus P7F |
| cg10907148 | 0.724    | 0.438    | 0.286     | 0.007            | NA                    | Hypermethylated in P3F versus P7F |
| cg12266049 | 0.711    | 0.443    | 0.268     | 0.007            | NA                    | Hypermethylated in P3F versus P7F |
| cg12131414 | 0.475    | 0.205    | 0.270     | 0.007            | NA                    | Hypermethylated in P3F versus P7F |
| cg17561417 | 0.502    | 0.202    | 0.300     | 0.007            | FBLN2                 | Hypermethylated in P3F versus P7F |
| cg07462756 | 0.706    | 0.445    | 0.261     | 0.007            | MSX1                  | Hypermethylated in P3F versus P7F |
| cg22772747 | 0.787    | 0.531    | 0.256     | 0.007            | NA                    | Hypermethylated in P3F versus P7F |
| cg24599270 | 0.695    | 0.348    | 0.346     | 0.007            | NA                    | Hypermethylated in P3F versus P7F |
| cg03330490 | 0.441    | 0.162    | 0.279     | 0.007            | NA                    | Hypermethylated in P3F versus P7F |
| cg09224689 | 0.635    | 0.372    | 0.262     | 0.007            | NA                    | Hypermethylated in P3F versus P7F |
| cg19340420 | 0.608    | 0.237    | 0.371     | 0.007            | NA                    | Hypermethylated in P3F versus P7F |
| cg14149680 | 0.668    | 0.292    | 0.376     | 0.007            | NA                    | Hypermethylated in P3F versus P7F |
| cg09477019 | 0.630    | 0.361    | 0.269     | 0.007            | NA                    | Hypermethylated in P3F versus P7F |
| cg16296442 | 0.504    | 0.215    | 0.289     | 0.007            | NA                    | Hypermethylated in P3F versus P7F |
| cg04284678 | 0.697    | 0.394    | 0.303     | 0.007            | NA                    | Hypermethylated in P3F versus P7F |
| cg11324712 | 0.653    | 0.396    | 0.257     | 0.007            | NA                    | Hypermethylated in P3F versus P7F |
| cg22531018 | 0.681    | 0.401    | 0.280     | 0.007            | TMEM139               | Hypermethylated in P3F versus P7F |
| cg21941030 | 0.698    | 0.338    | 0.361     | 0.007            | RCN3                  | Hypermethylated in P3F versus P7F |
| cg25037461 | 0.555    | 0.219    | 0.336     | 0.007            | DERL3                 | Hypermethylated in P3F versus P7F |
| cg27666046 | 0.661    | 0.353    | 0.308     | 0.007            | NA                    | Hypermethylated in P3F versus P7F |
| cg05408521 | 0.502    | 0.245    | 0.257     | 0.007            | KRTAP10-3             | Hypermethylated in P3F versus P7F |
| cg21016855 | 0.669    | 0.378    | 0.291     | 0.007            | NA                    | Hypermethylated in P3F versus P7F |
| cg04607032 | 0.701    | 0.397    | 0.304     | 0.007            | NA                    | Hypermethylated in P3F versus P7F |

### Supplementary Table 3 (continued)

| Probe      | P3F.mean | P7F.mean | Mean.diff | Adjusted.P.value | Promoter.related.gene | Category                          |
|------------|----------|----------|-----------|------------------|-----------------------|-----------------------------------|
| cg03445516 | 0.589    | 0.241    | 0.348     | 0.007            | NA                    | Hypermethylated in P3F versus P7F |
| cg26610739 | 0.612    | 0.360    | 0.252     | 0.007            | NA                    | Hypermethylated in P3F versus P7F |
| cg24495585 | 0.407    | 0.151    | 0.257     | 0.007            | NA                    | Hypermethylated in P3F versus P7F |
| cg00478435 | 0.438    | 0.159    | 0.280     | 0.007            | C20orf134             | Hypermethylated in P3F versus P7F |
| cg07476923 | 0.598    | 0.294    | 0.305     | 0.007            | NA                    | Hypermethylated in P3F versus P7F |
| cg19416570 | 0.604    | 0.290    | 0.314     | 0.007            | NA                    | Hypermethylated in P3F versus P7F |
| cg00409684 | 0.526    | 0.217    | 0.309     | 0.007            | NA                    | Hypermethylated in P3F versus P7F |
| cg09462924 | 0.582    | 0.199    | 0.383     | 0.007            | NA                    | Hypermethylated in P3F versus P7F |
| cg19904058 | 0.489    | 0.151    | 0.338     | 0.007            | NA                    | Hypermethylated in P3F versus P7F |
| cg13186228 | 0.727    | 0.460    | 0.267     | 0.007            | STX16                 | Hypermethylated in P3F versus P7F |
| cg13341668 | 0.766    | 0.507    | 0.259     | 0.007            | HYAL2                 | Hypermethylated in P3F versus P7F |
| cg06816651 | 0.607    | 0.329    | 0.277     | 0.007            | NA                    | Hypermethylated in P3F versus P7F |
| cg07143532 | 0.380    | 0.123    | 0.257     | 0.007            | NA                    | Hypermethylated in P3F versus P7F |
| cg26094554 | 0.508    | 0.231    | 0.277     | 0.007            | NA                    | Hypermethylated in P3F versus P7F |
| cg18041840 | 0.380    | 0.063    | 0.317     | 0.007            | NA                    | Hypermethylated in P3F versus P7F |
| cg11744767 | 0.392    | 0.136    | 0.256     | 0.007            | CDKN1C                | Hypermethylated in P3F versus P7F |
| cg19623624 | 0.522    | 0.149    | 0.373     | 0.007            | NA                    | Hypermethylated in P3F versus P7F |
| cg05247809 | 0.541    | 0.213    | 0.328     | 0.007            | LOC440461             | Hypermethylated in P3F versus P7F |
| cg27068330 | 0.426    | 0.121    | 0.305     | 0.007            | SIPA1                 | Hypermethylated in P3F versus P7F |
| cg26728422 | 0.659    | 0.397    | 0.262     | 0.007            | NA                    | Hypermethylated in P3F versus P7F |
| cg10702770 | 0.463    | 0.202    | 0.260     | 0.007            | NA                    | Hypermethylated in P3F versus P7F |
| cg05749855 | 0.555    | 0.247    | 0.308     | 0.007            | NA                    | Hypermethylated in P3F versus P7F |
| cg21141812 | 0.515    | 0.265    | 0.250     | 0.007            | NA                    | Hypermethylated in P3F versus P7F |
| cg11113363 | 0.642    | 0.343    | 0.299     | 0.007            | NA                    | Hypermethylated in P3F versus P7F |
| cg08327367 | 0.715    | 0.461    | 0.254     | 0.007            | NA                    | Hypermethylated in P3F versus P7F |

### Supplementary Table 3 (continued)

| Probe      | P3F.mean | P7F.mean | Mean.diff | Adjusted.P.value | Promoter.related.gene | Category                          |
|------------|----------|----------|-----------|------------------|-----------------------|-----------------------------------|
| cg16581085 | 0.762    | 0.489    | 0.273     | 0.007            | NA                    | Hypermethylated in P3F versus P7F |
| cg04256316 | 0.341    | 0.047    | 0.294     | 0.007            | SIPA1                 | Hypermethylated in P3F versus P7F |
| cg01793178 | 0.750    | 0.455    | 0.295     | 0.007            | NA                    | Hypermethylated in P3F versus P7F |
| cg01997272 | 0.550    | 0.245    | 0.305     | 0.007            | NA                    | Hypermethylated in P3F versus P7F |
| cg00287096 | 0.561    | 0.289    | 0.272     | 0.007            | NA                    | Hypermethylated in P3F versus P7F |
| cg00166372 | 0.702    | 0.447    | 0.255     | 0.007            | NA                    | Hypermethylated in P3F versus P7F |
| cg21042248 | 0.535    | 0.262    | 0.274     | 0.007            | NA                    | Hypermethylated in P3F versus P7F |
| cg08086720 | 0.554    | 0.242    | 0.312     | 0.007            | NA                    | Hypermethylated in P3F versus P7F |
| cg20645729 | 0.442    | 0.127    | 0.315     | 0.007            | LOC440461             | Hypermethylated in P3F versus P7F |
| cg16765006 | 0.366    | 0.095    | 0.271     | 0.007            | LOC440461             | Hypermethylated in P3F versus P7F |
| cg26681770 | 0.810    | 0.517    | 0.293     | 0.007            | NA                    | Hypermethylated in P3F versus P7F |
| cg25449950 | 0.660    | 0.381    | 0.279     | 0.007            | SOD3                  | Hypermethylated in P3F versus P7F |
| cg24075113 | 0.456    | 0.149    | 0.307     | 0.007            | NA                    | Hypermethylated in P3F versus P7F |
| cg20896233 | 0.729    | 0.464    | 0.265     | 0.008            | NA                    | Hypermethylated in P3F versus P7F |
| cg09285851 | 0.600    | 0.324    | 0.276     | 0.008            | NA                    | Hypermethylated in P3F versus P7F |
| cg16235582 | 0.696    | 0.370    | 0.326     | 0.008            | NA                    | Hypermethylated in P3F versus P7F |
| cg06657050 | 0.551    | 0.278    | 0.272     | 0.008            | ONECUT1               | Hypermethylated in P3F versus P7F |
| cg02352685 | 0.706    | 0.448    | 0.258     | 0.008            | NA                    | Hypermethylated in P3F versus P7F |
| cg23820770 | 0.554    | 0.277    | 0.276     | 0.008            | DYSF                  | Hypermethylated in P3F versus P7F |
| cg22982368 | 0.665    | 0.359    | 0.306     | 0.008            | NA                    | Hypermethylated in P3F versus P7F |
| cg05732979 | 0.738    | 0.467    | 0.270     | 0.008            | NA                    | Hypermethylated in P3F versus P7F |
| cg09048129 | 0.651    | 0.384    | 0.267     | 0.008            | USP2                  | Hypermethylated in P3F versus P7F |
| cg00219282 | 0.476    | 0.211    | 0.265     | 0.008            | NA                    | Hypermethylated in P3F versus P7F |
| cg04608582 | 0.477    | 0.225    | 0.252     | 0.008            | NA                    | Hypermethylated in P3F versus P7F |
| cg13512859 | 0.595    | 0.325    | 0.270     | 0.008            | NA                    | Hypermethylated in P3F versus P7F |

### Supplementary Table 3 (continued)

| Probe      | P3F.mean | P7F.mean | Mean.diff | Adjusted.P.value | Promoter.related.gene | Category                          |
|------------|----------|----------|-----------|------------------|-----------------------|-----------------------------------|
| cg26251208 | 0.628    | 0.346    | 0.282     | 0.008            | NA                    | Hypermethylated in P3F versus P7F |
| cg15692239 | 0.493    | 0.225    | 0.268     | 0.008            | ALDOC                 | Hypermethylated in P3F versus P7F |
| cg16216407 | 0.619    | 0.365    | 0.254     | 0.008            | SOD3                  | Hypermethylated in P3F versus P7F |
| cg02048412 | 0.649    | 0.399    | 0.251     | 0.008            | VASN                  | Hypermethylated in P3F versus P7F |
| cg19082708 | 0.454    | 0.144    | 0.310     | 0.008            | NA                    | Hypermethylated in P3F versus P7F |
| cg04562683 | 0.578    | 0.219    | 0.359     | 0.008            | NA                    | Hypermethylated in P3F versus P7F |
| cg19492423 | 0.603    | 0.268    | 0.335     | 0.008            | NA                    | Hypermethylated in P3F versus P7F |
| cg06732439 | 0.601    | 0.294    | 0.307     | 0.008            | LOC151174_LOC643387   | Hypermethylated in P3F versus P7F |
| cg20014398 | 0.781    | 0.507    | 0.274     | 0.008            | NA                    | Hypermethylated in P3F versus P7F |
| cg03589296 | 0.613    | 0.250    | 0.363     | 0.008            | NA                    | Hypermethylated in P3F versus P7F |
| cg23050971 | 0.717    | 0.462    | 0.255     | 0.008            | NA                    | Hypermethylated in P3F versus P7F |
| cg22852065 | 0.625    | 0.312    | 0.313     | 0.008            | NA                    | Hypermethylated in P3F versus P7F |
| cg20684180 | 0.685    | 0.364    | 0.321     | 0.008            | DLEC1                 | Hypermethylated in P3F versus P7F |
| cg23172480 | 0.569    | 0.286    | 0.283     | 0.008            | DCBLD1                | Hypermethylated in P3F versus P7F |
| cg08467595 | 0.451    | 0.164    | 0.287     | 0.008            | IQSEC1                | Hypermethylated in P3F versus P7F |
| cg11904266 | 0.432    | 0.151    | 0.281     | 0.008            | NA                    | Hypermethylated in P3F versus P7F |
| cg01270424 | 0.534    | 0.232    | 0.302     | 0.008            | NA                    | Hypermethylated in P3F versus P7F |
| cg02987249 | 0.572    | 0.315    | 0.257     | 0.008            | NA                    | Hypermethylated in P3F versus P7F |
| cg02537108 | 0.759    | 0.472    | 0.287     | 0.008            | NA                    | Hypermethylated in P3F versus P7F |
| cg11412288 | 0.694    | 0.423    | 0.271     | 0.008            | DCBLD1                | Hypermethylated in P3F versus P7F |
| cg16604516 | 0.591    | 0.333    | 0.258     | 0.008            | FBLN2                 | Hypermethylated in P3F versus P7F |
| cg22987116 | 0.699    | 0.366    | 0.333     | 0.008            | NA                    | Hypermethylated in P3F versus P7F |
| cg10022722 | 0.592    | 0.285    | 0.307     | 0.008            | NA                    | Hypermethylated in P3F versus P7F |
| cg20562147 | 0.550    | 0.251    | 0.299     | 0.008            | NA                    | Hypermethylated in P3F versus P7F |
| cg16531664 | 0.700    | 0.437    | 0.263     | 0.008            | NA                    | Hypermethylated in P3F versus P7F |

### Supplementary Table 3 (continued)

| Probe      | P3F.mean | P7F.mean | Mean.diff | Adjusted.P.value | Promoter.related.gene | Category                          |
|------------|----------|----------|-----------|------------------|-----------------------|-----------------------------------|
| cg22761670 | 0.641    | 0.330    | 0.312     | 0.008            | NA                    | Hypermethylated in P3F versus P7F |
| cg15963326 | 0.611    | 0.269    | 0.342     | 0.008            | NA                    | Hypermethylated in P3F versus P7F |
| cg09198138 | 0.750    | 0.465    | 0.285     | 0.008            | NA                    | Hypermethylated in P3F versus P7F |
| cg08755224 | 0.504    | 0.189    | 0.315     | 0.008            | NA                    | Hypermethylated in P3F versus P7F |
| cg00490648 | 0.806    | 0.493    | 0.313     | 0.008            | NA                    | Hypermethylated in P3F versus P7F |
| cg07525299 | 0.659    | 0.383    | 0.276     | 0.008            | ASCL2                 | Hypermethylated in P3F versus P7F |
| cg06342954 | 0.736    | 0.464    | 0.272     | 0.008            | NA                    | Hypermethylated in P3F versus P7F |
| cg01747862 | 0.605    | 0.335    | 0.270     | 0.008            | NA                    | Hypermethylated in P3F versus P7F |
| cg07683388 | 0.601    | 0.286    | 0.315     | 0.008            | NA                    | Hypermethylated in P3F versus P7F |
| cg19944656 | 0.570    | 0.280    | 0.290     | 0.008            | NA                    | Hypermethylated in P3F versus P7F |
| cg01761236 | 0.674    | 0.378    | 0.297     | 0.008            | NA                    | Hypermethylated in P3F versus P7F |
| cg24148817 | 0.687    | 0.329    | 0.358     | 0.008            | NA                    | Hypermethylated in P3F versus P7F |
| cg10376286 | 0.655    | 0.382    | 0.273     | 0.008            | NA                    | Hypermethylated in P3F versus P7F |
| cg24152000 | 0.701    | 0.429    | 0.272     | 0.008            | NA                    | Hypermethylated in P3F versus P7F |
| cg02917603 | 0.670    | 0.371    | 0.299     | 0.008            | NA                    | Hypermethylated in P3F versus P7F |
| cg13621679 | 0.542    | 0.210    | 0.332     | 0.008            | NA                    | Hypermethylated in P3F versus P7F |
| cg01540172 | 0.665    | 0.398    | 0.267     | 0.008            | NA                    | Hypermethylated in P3F versus P7F |
| cg15058464 | 0.497    | 0.170    | 0.327     | 0.008            | C20orf56              | Hypermethylated in P3F versus P7F |
| cg07284558 | 0.681    | 0.398    | 0.283     | 0.008            | STK32C                | Hypermethylated in P3F versus P7F |
| cg14022778 | 0.728    | 0.476    | 0.252     | 0.008            | NA                    | Hypermethylated in P3F versus P7F |
| cg22084515 | 0.755    | 0.478    | 0.278     | 0.008            | NA                    | Hypermethylated in P3F versus P7F |
| cg05758861 | 0.760    | 0.502    | 0.259     | 0.008            | NA                    | Hypermethylated in P3F versus P7F |
| cg16689724 | 0.574    | 0.303    | 0.271     | 0.008            | NA                    | Hypermethylated in P3F versus P7F |
| cg17979068 | 0.639    | 0.376    | 0.263     | 0.008            | NA                    | Hypermethylated in P3F versus P7F |
| cg01456571 | 0.546    | 0.202    | 0.343     | 0.008            | TNFRSF10D             | Hypermethylated in P3F versus P7F |

### Supplementary Table 3 (continued)

| Probe      | P3F.mean | P7F.mean | Mean.diff | Adjusted.P.value | Promoter.related.gene | Category                          |
|------------|----------|----------|-----------|------------------|-----------------------|-----------------------------------|
| cg24675150 | 0.628    | 0.245    | 0.382     | 0.008            | NA                    | Hypermethylated in P3F versus P7F |
| cg10208113 | 0.756    | 0.457    | 0.298     | 0.008            | NA                    | Hypermethylated in P3F versus P7F |
| cg13504993 | 0.539    | 0.249    | 0.291     | 0.008            | STK32C                | Hypermethylated in P3F versus P7F |
| cg13839293 | 0.397    | 0.104    | 0.292     | 0.008            | PGAP2                 | Hypermethylated in P3F versus P7F |
| cg01624768 | 0.774    | 0.504    | 0.270     | 0.008            | NA                    | Hypermethylated in P3F versus P7F |
| cg12283398 | 0.741    | 0.458    | 0.283     | 0.008            | NA                    | Hypermethylated in P3F versus P7F |
| cg00423364 | 0.683    | 0.381    | 0.302     | 0.008            | NA                    | Hypermethylated in P3F versus P7F |
| cg00927231 | 0.338    | 0.082    | 0.257     | 0.008            | NA                    | Hypermethylated in P3F versus P7F |
| cg20842253 | 0.408    | 0.085    | 0.322     | 0.008            | NA                    | Hypermethylated in P3F versus P7F |
| cg22731271 | 0.622    | 0.242    | 0.380     | 0.008            | NA                    | Hypermethylated in P3F versus P7F |
| cg16481365 | 0.673    | 0.405    | 0.268     | 0.008            | NA                    | Hypermethylated in P3F versus P7F |
| cg14932408 | 0.581    | 0.283    | 0.298     | 0.008            | NA                    | Hypermethylated in P3F versus P7F |
| cg17390301 | 0.463    | 0.210    | 0.253     | 0.008            | POU2AF1               | Hypermethylated in P3F versus P7F |
| cg01016662 | 0.380    | 0.089    | 0.292     | 0.008            | NA                    | Hypermethylated in P3F versus P7F |
| cg09861917 | 0.524    | 0.204    | 0.321     | 0.008            | FOXA2                 | Hypermethylated in P3F versus P7F |
| cg15008124 | 0.565    | 0.225    | 0.340     | 0.008            | NA                    | Hypermethylated in P3F versus P7F |
| cg01274660 | 0.546    | 0.225    | 0.321     | 0.008            | NA                    | Hypermethylated in P3F versus P7F |
| cg22840219 | 0.577    | 0.233    | 0.345     | 0.009            | NA                    | Hypermethylated in P3F versus P7F |
| cg20015986 | 0.764    | 0.512    | 0.252     | 0.009            | NA                    | Hypermethylated in P3F versus P7F |
| cg05878073 | 0.667    | 0.403    | 0.264     | 0.009            | NA                    | Hypermethylated in P3F versus P7F |
| cg13990351 | 0.460    | 0.147    | 0.313     | 0.009            | NA                    | Hypermethylated in P3F versus P7F |
| cg21411366 | 0.655    | 0.398    | 0.257     | 0.009            | SOD3                  | Hypermethylated in P3F versus P7F |
| cg14992000 | 0.858    | 0.600    | 0.257     | 0.009            | NA                    | Hypermethylated in P3F versus P7F |
| cg07336617 | 0.725    | 0.450    | 0.276     | 0.009            | OTP                   | Hypermethylated in P3F versus P7F |
| cg14341131 | 0.556    | 0.258    | 0.298     | 0.009            | NA                    | Hypermethylated in P3F versus P7F |

### Supplementary Table 3 (continued)

| Probe      | P3F.mean | P7F.mean | Mean.diff | Adjusted.P.value | Promoter.related.gene | Category                          |
|------------|----------|----------|-----------|------------------|-----------------------|-----------------------------------|
| cg13411506 | 0.826    | 0.558    | 0.268     | 0.009            | NA                    | Hypermethylated in P3F versus P7F |
| cg21791662 | 0.549    | 0.212    | 0.337     | 0.009            | NA                    | Hypermethylated in P3F versus P7F |
| cg01882866 | 0.532    | 0.236    | 0.295     | 0.009            | NA                    | Hypermethylated in P3F versus P7F |
| cg14611402 | 0.579    | 0.322    | 0.257     | 0.009            | DCBLD1                | Hypermethylated in P3F versus P7F |
| cg04540976 | 0.408    | 0.145    | 0.262     | 0.009            | CD3EAP_PPP1R13L       | Hypermethylated in P3F versus P7F |
| cg01137955 | 0.560    | 0.244    | 0.316     | 0.009            | NA                    | Hypermethylated in P3F versus P7F |
| cg10357060 | 0.622    | 0.314    | 0.308     | 0.009            | NA                    | Hypermethylated in P3F versus P7F |
| cg13354988 | 0.602    | 0.336    | 0.266     | 0.009            | ACP1                  | Hypermethylated in P3F versus P7F |
| cg21739934 | 0.632    | 0.339    | 0.293     | 0.009            | NA                    | Hypermethylated in P3F versus P7F |
| cg07831351 | 0.371    | 0.060    | 0.311     | 0.009            | NA                    | Hypermethylated in P3F versus P7F |
| cg01754267 | 0.689    | 0.429    | 0.261     | 0.009            | NA                    | Hypermethylated in P3F versus P7F |
| cg13451222 | 0.330    | 0.054    | 0.276     | 0.009            | SIPA1                 | Hypermethylated in P3F versus P7F |
| cg17321883 | 0.417    | 0.069    | 0.348     | 0.009            | AMIGO3                | Hypermethylated in P3F versus P7F |
| cg02155957 | 0.573    | 0.321    | 0.252     | 0.009            | NA                    | Hypermethylated in P3F versus P7F |
| cg12115991 | 0.538    | 0.274    | 0.264     | 0.009            | NA                    | Hypermethylated in P3F versus P7F |
| cg12590902 | 0.574    | 0.274    | 0.300     | 0.009            | NA                    | Hypermethylated in P3F versus P7F |
| cg09316140 | 0.628    | 0.370    | 0.257     | 0.009            | EPB49                 | Hypermethylated in P3F versus P7F |
| cg00142670 | 0.577    | 0.321    | 0.255     | 0.009            | C6orf154              | Hypermethylated in P3F versus P7F |
| cg18872016 | 0.521    | 0.227    | 0.294     | 0.009            | NA                    | Hypermethylated in P3F versus P7F |
| cg18344930 | 0.415    | 0.153    | 0.262     | 0.009            | NA                    | Hypermethylated in P3F versus P7F |
| cg03222834 | 0.663    | 0.390    | 0.273     | 0.009            | NA                    | Hypermethylated in P3F versus P7F |
| cg14765959 | 0.480    | 0.201    | 0.279     | 0.009            | NA                    | Hypermethylated in P3F versus P7F |
| cg05559445 | 0.520    | 0.244    | 0.276     | 0.009            | CDKN1C                | Hypermethylated in P3F versus P7F |
| cg00918522 | 0.657    | 0.337    | 0.320     | 0.009            | NA                    | Hypermethylated in P3F versus P7F |
| cg18183817 | 0.597    | 0.278    | 0.319     | 0.009            | NA                    | Hypermethylated in P3F versus P7F |

### Supplementary Table 3 (continued)

| Probe      | P3F.mean | P7F.mean | Mean.diff | Adjusted.P.value | Promoter.related.gene | Category                          |
|------------|----------|----------|-----------|------------------|-----------------------|-----------------------------------|
| cg17179314 | 0.555    | 0.294    | 0.261     | 0.009            | CHRNA4                | Hypermethylated in P3F versus P7F |
| cg02474542 | 0.533    | 0.203    | 0.329     | 0.009            | NA                    | Hypermethylated in P3F versus P7F |
| cg26785604 | 0.739    | 0.482    | 0.257     | 0.009            | NA                    | Hypermethylated in P3F versus P7F |
| cg21165221 | 0.644    | 0.358    | 0.286     | 0.009            | NA                    | Hypermethylated in P3F versus P7F |
| cg03854796 | 0.666    | 0.413    | 0.253     | 0.009            | NA                    | Hypermethylated in P3F versus P7F |
| cg14208102 | 0.619    | 0.359    | 0.260     | 0.009            | TREX1                 | Hypermethylated in P3F versus P7F |
| cg03006588 | 0.641    | 0.390    | 0.250     | 0.009            | NA                    | Hypermethylated in P3F versus P7F |
| cg18369516 | 0.639    | 0.241    | 0.397     | 0.009            | NA                    | Hypermethylated in P3F versus P7F |
| cg25042860 | 0.536    | 0.283    | 0.253     | 0.009            | NA                    | Hypermethylated in P3F versus P7F |
| cg04036593 | 0.515    | 0.245    | 0.269     | 0.009            | NA                    | Hypermethylated in P3F versus P7F |
| cg01137760 | 0.352    | 0.092    | 0.260     | 0.009            | NA                    | Hypermethylated in P3F versus P7F |
| cg05915293 | 0.440    | 0.147    | 0.292     | 0.009            | NA                    | Hypermethylated in P3F versus P7F |
| cg11644479 | 0.753    | 0.481    | 0.272     | 0.009            | ASCL2                 | Hypermethylated in P3F versus P7F |
| cg07211292 | 0.530    | 0.201    | 0.329     | 0.009            | NA                    | Hypermethylated in P3F versus P7F |
| cg23444101 | 0.645    | 0.294    | 0.351     | 0.009            | ALS2CL                | Hypermethylated in P3F versus P7F |
| cg18497508 | 0.595    | 0.263    | 0.331     | 0.009            | NA                    | Hypermethylated in P3F versus P7F |
| cg06784545 | 0.636    | 0.384    | 0.252     | 0.009            | NA                    | Hypermethylated in P3F versus P7F |
| cg18769818 | 0.468    | 0.212    | 0.255     | 0.009            | ARAP1                 | Hypermethylated in P3F versus P7F |
| cg02185052 | 0.571    | 0.320    | 0.251     | 0.009            | NA                    | Hypermethylated in P3F versus P7F |
| cg15442737 | 0.593    | 0.330    | 0.264     | 0.009            | NA                    | Hypermethylated in P3F versus P7F |
| cg18823007 | 0.539    | 0.166    | 0.373     | 0.009            | NA                    | Hypermethylated in P3F versus P7F |
| cg03577139 | 0.667    | 0.402    | 0.266     | 0.009            | SOD3                  | Hypermethylated in P3F versus P7F |
| cg09496748 | 0.702    | 0.433    | 0.269     | 0.009            | NA                    | Hypermethylated in P3F versus P7F |
| cg16332927 | 0.683    | 0.340    | 0.343     | 0.009            | NA                    | Hypermethylated in P3F versus P7F |
| cg03904042 | 0.566    | 0.256    | 0.309     | 0.009            | C20orf134             | Hypermethylated in P3F versus P7F |



### Supplementary Table 3 (continued)

| Probe      | P3F.mean | P7F.mean | Mean.diff | Adjusted.P.value | Promoter.related.gene | Category                          |
|------------|----------|----------|-----------|------------------|-----------------------|-----------------------------------|
| cg20713092 | 0.726    | 0.473    | 0.253     | 0.009            | NA                    | Hypermethylated in P3F versus P7F |
| cg23695037 | 0.663    | 0.405    | 0.258     | 0.009            | NA                    | Hypermethylated in P3F versus P7F |
| cg18024487 | 0.552    | 0.195    | 0.356     | 0.009            | DERL3                 | Hypermethylated in P3F versus P7F |
| cg14621221 | 0.631    | 0.361    | 0.270     | 0.009            | NA                    | Hypermethylated in P3F versus P7F |
| cg22777062 | 0.617    | 0.269    | 0.348     | 0.010            | NA                    | Hypermethylated in P3F versus P7F |
| cg00409917 | 0.561    | 0.296    | 0.265     | 0.010            | HCG4P6                | Hypermethylated in P3F versus P7F |
| cg08266366 | 0.529    | 0.226    | 0.303     | 0.010            | AQP5                  | Hypermethylated in P3F versus P7F |
| cg11234637 | 0.722    | 0.456    | 0.266     | 0.010            | CYP26C1               | Hypermethylated in P3F versus P7F |
| cg15069620 | 0.780    | 0.476    | 0.303     | 0.010            | NA                    | Hypermethylated in P3F versus P7F |
| cg03924566 | 0.617    | 0.356    | 0.261     | 0.010            | BAI1                  | Hypermethylated in P3F versus P7F |
| cg23932658 | 0.679    | 0.424    | 0.255     | 0.010            | NA                    | Hypermethylated in P3F versus P7F |
| cg07246273 | 0.683    | 0.367    | 0.316     | 0.010            | NA                    | Hypermethylated in P3F versus P7F |
| cg17534899 | 0.400    | 0.123    | 0.277     | 0.010            | IQSEC1                | Hypermethylated in P3F versus P7F |
| cg04717143 | 0.548    | 0.263    | 0.285     | 0.010            | NA                    | Hypermethylated in P3F versus P7F |
| cg19452248 | 0.599    | 0.322    | 0.277     | 0.010            | NA                    | Hypermethylated in P3F versus P7F |
| cg11790551 | 0.743    | 0.444    | 0.299     | 0.010            | NA                    | Hypermethylated in P3F versus P7F |
| cg00691874 | 0.546    | 0.279    | 0.267     | 0.010            | NA                    | Hypermethylated in P3F versus P7F |
| cg14372753 | 0.788    | 0.517    | 0.271     | 0.010            | NA                    | Hypermethylated in P3F versus P7F |
| cg08345575 | 0.596    | 0.246    | 0.349     | 0.010            | HMOX2                 | Hypermethylated in P3F versus P7F |
| cg07453857 | 0.671    | 0.417    | 0.254     | 0.010            | NA                    | Hypermethylated in P3F versus P7F |
| cg05894847 | 0.532    | 0.266    | 0.266     | 0.010            | NA                    | Hypermethylated in P3F versus P7F |
| cg26051413 | 0.678    | 0.338    | 0.340     | 0.010            | ASCL2                 | Hypermethylated in P3F versus P7F |
| cg21238440 | 0.597    | 0.335    | 0.262     | 0.010            | NA                    | Hypermethylated in P3F versus P7F |
| cg20703122 | 0.742    | 0.463    | 0.279     | 0.010            | NA                    | Hypermethylated in P3F versus P7F |
| cg13291862 | 0.551    | 0.223    | 0.328     | 0.010            | CHUK                  | Hypermethylated in P3F versus P7F |

### Supplementary Table 3 (continued)

| Probe      | P3F.mean | P7F.mean | Mean.diff | Adjusted.P.value | Promoter.related.gene | Category                          |
|------------|----------|----------|-----------|------------------|-----------------------|-----------------------------------|
| cg15460093 | 0.323    | 0.055    | 0.268     | 0.01             | ADAM8                 | Hypermethylated in P3F versus P7F |
| cg02468250 | 0.585    | 0.275    | 0.310     | 0.01             | PAX6                  | Hypermethylated in P3F versus P7F |
| cg03086067 | 0.586    | 0.335    | 0.251     | 0.01             | NA                    | Hypermethylated in P3F versus P7F |
| cg14248715 | 0.695    | 0.390    | 0.305     | 0.01             | NA                    | Hypermethylated in P3F versus P7F |
| cg00921682 | 0.692    | 0.362    | 0.330     | 0.01             | CEACAM21              | Hypermethylated in P3F versus P7F |
| cg15923025 | 0.355    | 0.052    | 0.303     | 0.01             | EIF4EBP3              | Hypermethylated in P3F versus P7F |
| cg23855989 | 0.574    | 0.271    | 0.303     | 0.01             | AQP5                  | Hypermethylated in P3F versus P7F |
| cg04776470 | 0.716    | 0.415    | 0.301     | 0.01             | NA                    | Hypermethylated in P3F versus P7F |
| cg16421871 | 0.675    | 0.388    | 0.287     | 0.01             | NA                    | Hypermethylated in P3F versus P7F |
| cg04295928 | 0.373    | 0.109    | 0.264     | 0.01             | PGAP2                 | Hypermethylated in P3F versus P7F |
| cg22125805 | 0.597    | 0.323    | 0.275     | 0.01             | NA                    | Hypermethylated in P3F versus P7F |
| cg15920743 | 0.577    | 0.233    | 0.344     | 0.01             | NA                    | Hypermethylated in P3F versus P7F |
| cg01180479 | 0.488    | 0.180    | 0.309     | 0.01             | NA                    | Hypermethylated in P3F versus P7F |
| cg24018520 | 0.595    | 0.287    | 0.308     | 0.01             | NA                    | Hypermethylated in P3F versus P7F |
| cg24480695 | 0.422    | 0.109    | 0.313     | 0.01             | NA                    | Hypermethylated in P3F versus P7F |
| cg02855836 | 0.679    | 0.387    | 0.293     | 0.01             | NA                    | Hypermethylated in P3F versus P7F |
| cg11904906 | 0.569    | 0.314    | 0.255     | 0.01             | LOC643387             | Hypermethylated in P3F versus P7F |
| cg11798857 | 0.566    | 0.313    | 0.253     | 0.01             | FOXA2                 | Hypermethylated in P3F versus P7F |
| cg01089249 | 0.713    | 0.425    | 0.288     | 0.01             | NA                    | Hypermethylated in P3F versus P7F |
| cg10731022 | 0.405    | 0.099    | 0.306     | 0.01             | EIF4EBP3              | Hypermethylated in P3F versus P7F |
| cg16329658 | 0.657    | 0.385    | 0.272     | 0.01             | NA                    | Hypermethylated in P3F versus P7F |
| cg16513459 | 0.646    | 0.285    | 0.361     | 0.01             | KCNAB3                | Hypermethylated in P3F versus P7F |
| cg15874481 | 0.655    | 0.337    | 0.318     | 0.01             | NA                    | Hypermethylated in P3F versus P7F |
| cg19714279 | 0.638    | 0.355    | 0.283     | 0.01             | GBX2                  | Hypermethylated in P3F versus P7F |
| cg06653203 | 0.662    | 0.360    | 0.302     | 0.01             | NA                    | Hypermethylated in P3F versus P7F |

### Supplementary Table 3 (continued)

| Probe      | P3F.mean | P7F.mean | Mean.diff | Adjusted.P.value | Promoter.related.gene | Category                          |
|------------|----------|----------|-----------|------------------|-----------------------|-----------------------------------|
| cg16325826 | 0.864    | 0.600    | 0.263     | 0.010            | NA                    | Hypermethylated in P3F versus P7F |
| cg13291283 | 0.419    | 0.112    | 0.306     | 0.010            | NA                    | Hypermethylated in P3F versus P7F |
| cg16898124 | 0.628    | 0.338    | 0.290     | 0.010            | ZXDC                  | Hypermethylated in P3F versus P7F |
| cg21379004 | 0.733    | 0.475    | 0.258     | 0.010            | ALS2CL                | Hypermethylated in P3F versus P7F |
| cg13197560 | 0.634    | 0.374    | 0.260     | 0.010            | NA                    | Hypermethylated in P3F versus P7F |
| cg08153651 | 0.624    | 0.349    | 0.275     | 0.010            | NA                    | Hypermethylated in P3F versus P7F |
| cg15467646 | 0.625    | 0.349    | 0.275     | 0.010            | NA                    | Hypermethylated in P3F versus P7F |
| cg10316525 | 0.765    | 0.497    | 0.268     | 0.010            | NA                    | Hypermethylated in P3F versus P7F |
| cg15561501 | 0.715    | 0.458    | 0.257     | 0.010            | NA                    | Hypermethylated in P3F versus P7F |
| cg07643096 | 0.528    | 0.274    | 0.253     | 0.010            | DCBLD1                | Hypermethylated in P3F versus P7F |
| cg01141339 | 0.421    | 0.140    | 0.281     | 0.011            | NA                    | Hypermethylated in P3F versus P7F |
| cg01480771 | 0.551    | 0.298    | 0.253     | 0.011            | KLK4                  | Hypermethylated in P3F versus P7F |
| cg01148731 | 0.768    | 0.504    | 0.264     | 0.011            | NA                    | Hypermethylated in P3F versus P7F |
| cg13411784 | 0.518    | 0.263    | 0.255     | 0.011            | WDR85                 | Hypermethylated in P3F versus P7F |
| cg06666008 | 0.589    | 0.337    | 0.252     | 0.011            | NA                    | Hypermethylated in P3F versus P7F |
| cg16828648 | 0.375    | 0.087    | 0.288     | 0.011            | PGAP2                 | Hypermethylated in P3F versus P7F |
| cg23974194 | 0.761    | 0.482    | 0.279     | 0.011            | NA                    | Hypermethylated in P3F versus P7F |
| cg19746186 | 0.685    | 0.431    | 0.254     | 0.011            | NA                    | Hypermethylated in P3F versus P7F |
| cg02876293 | 0.494    | 0.232    | 0.261     | 0.011            | NA                    | Hypermethylated in P3F versus P7F |
| cg17184430 | 0.633    | 0.363    | 0.269     | 0.011            | NA                    | Hypermethylated in P3F versus P7F |
| cg19511748 | 0.621    | 0.369    | 0.252     | 0.011            | NA                    | Hypermethylated in P3F versus P7F |
| cg25637894 | 0.672    | 0.367    | 0.305     | 0.011            | NA                    | Hypermethylated in P3F versus P7F |
| cg19878200 | 0.684    | 0.401    | 0.283     | 0.011            | NA                    | Hypermethylated in P3F versus P7F |
| cg03987506 | 0.617    | 0.361    | 0.256     | 0.011            | NA                    | Hypermethylated in P3F versus P7F |
| cg26686732 | 0.667    | 0.409    | 0.258     | 0.011            | NA                    | Hypermethylated in P3F versus P7F |

### Supplementary Table 3 (continued)

| Probe      | P3F.mean | P7F.mean | Mean.diff | Adjusted.P.value | Promoter.related.gene | Category                          |
|------------|----------|----------|-----------|------------------|-----------------------|-----------------------------------|
| cg16145211 | 0.574    | 0.209    | 0.365     | 0.011            | NA                    | Hypermethylated in P3F versus P7F |
| cg16832975 | 0.722    | 0.370    | 0.352     | 0.011            | NA                    | Hypermethylated in P3F versus P7F |
| cg27166381 | 0.521    | 0.237    | 0.283     | 0.011            | NA                    | Hypermethylated in P3F versus P7F |
| cg16940012 | 0.727    | 0.417    | 0.310     | 0.011            | NA                    | Hypermethylated in P3F versus P7F |
| cg02591564 | 0.806    | 0.494    | 0.313     | 0.011            | NA                    | Hypermethylated in P3F versus P7F |
| cg02771142 | 0.683    | 0.404    | 0.279     | 0.011            | NA                    | Hypermethylated in P3F versus P7F |
| cg09440270 | 0.539    | 0.268    | 0.271     | 0.011            | CYP26C1               | Hypermethylated in P3F versus P7F |
| cg16737517 | 0.602    | 0.253    | 0.349     | 0.011            | NA                    | Hypermethylated in P3F versus P7F |
| cg05738240 | 0.538    | 0.207    | 0.331     | 0.011            | NA                    | Hypermethylated in P3F versus P7F |
| cg20588069 | 0.744    | 0.493    | 0.251     | 0.011            | MSX1                  | Hypermethylated in P3F versus P7F |
| cg26911562 | 0.345    | 0.069    | 0.276     | 0.011            | EIF4EBP3              | Hypermethylated in P3F versus P7F |
| cg07484220 | 0.601    | 0.312    | 0.289     | 0.011            | NA                    | Hypermethylated in P3F versus P7F |
| cg14438885 | 0.495    | 0.237    | 0.257     | 0.011            | NA                    | Hypermethylated in P3F versus P7F |
| cg13692105 | 0.683    | 0.408    | 0.275     | 0.011            | SOHLH1                | Hypermethylated in P3F versus P7F |
| cg14772800 | 0.658    | 0.363    | 0.295     | 0.011            | NA                    | Hypermethylated in P3F versus P7F |
| cg12162138 | 0.627    | 0.254    | 0.374     | 0.011            | NA                    | Hypermethylated in P3F versus P7F |
| cg01129004 | 0.429    | 0.160    | 0.269     | 0.011            | NA                    | Hypermethylated in P3F versus P7F |
| cg20402783 | 0.681    | 0.407    | 0.274     | 0.011            | NA                    | Hypermethylated in P3F versus P7F |
| cg10063637 | 0.443    | 0.156    | 0.287     | 0.011            | HMOX2                 | Hypermethylated in P3F versus P7F |
| cg26365854 | 0.664    | 0.287    | 0.377     | 0.011            | NA                    | Hypermethylated in P3F versus P7F |
| cg07043604 | 0.667    | 0.417    | 0.250     | 0.011            | NA                    | Hypermethylated in P3F versus P7F |
| cg22871485 | 0.498    | 0.230    | 0.267     | 0.011            | PRAME                 | Hypermethylated in P3F versus P7F |
| cg16304215 | 0.721    | 0.457    | 0.264     | 0.011            | NA                    | Hypermethylated in P3F versus P7F |
| cg07124173 | 0.384    | 0.056    | 0.328     | 0.011            | EIF4EBP3              | Hypermethylated in P3F versus P7F |
| cg01768201 | 0.534    | 0.278    | 0.256     | 0.011            | NA                    | Hypermethylated in P3F versus P7F |

### Supplementary Table 3 (continued)

| Probe      | P3F.mean | P7F.mean | Mean.diff | Adjusted.P.value | Promoter.related.gene | Category                          |
|------------|----------|----------|-----------|------------------|-----------------------|-----------------------------------|
| cg27088726 | 0.643    | 0.376    | 0.267     | 0.011            | NA                    | Hypermethylated in P3F versus P7F |
| cg18372607 | 0.744    | 0.483    | 0.261     | 0.011            | NA                    | Hypermethylated in P3F versus P7F |
| cg02389513 | 0.628    | 0.358    | 0.271     | 0.011            | NA                    | Hypermethylated in P3F versus P7F |
| cg25682097 | 0.712    | 0.453    | 0.258     | 0.011            | NA                    | Hypermethylated in P3F versus P7F |
| cg13415073 | 0.572    | 0.298    | 0.274     | 0.011            | NA                    | Hypermethylated in P3F versus P7F |
| cg25492583 | 0.590    | 0.321    | 0.269     | 0.011            | NA                    | Hypermethylated in P3F versus P7F |
| cg27587568 | 0.781    | 0.504    | 0.277     | 0.011            | NA                    | Hypermethylated in P3F versus P7F |
| cg26724949 | 0.690    | 0.352    | 0.338     | 0.011            | NA                    | Hypermethylated in P3F versus P7F |
| cg02225085 | 0.679    | 0.412    | 0.267     | 0.011            | NA                    | Hypermethylated in P3F versus P7F |
| cg26955845 | 0.587    | 0.287    | 0.299     | 0.011            | NA                    | Hypermethylated in P3F versus P7F |
| cg23881725 | 0.652    | 0.382    | 0.270     | 0.011            | DLEC1                 | Hypermethylated in P3F versus P7F |
| cg13433250 | 0.525    | 0.213    | 0.313     | 0.011            | LOC100132215          | Hypermethylated in P3F versus P7F |
| cg08087868 | 0.567    | 0.286    | 0.281     | 0.011            | NA                    | Hypermethylated in P3F versus P7F |
| cg15934104 | 0.739    | 0.477    | 0.262     | 0.011            | NA                    | Hypermethylated in P3F versus P7F |
| cg17542408 | 0.682    | 0.310    | 0.372     | 0.012            | NA                    | Hypermethylated in P3F versus P7F |
| cg10474881 | 0.715    | 0.368    | 0.347     | 0.012            | NA                    | Hypermethylated in P3F versus P7F |
| cg09173378 | 0.751    | 0.488    | 0.263     | 0.012            | NA                    | Hypermethylated in P3F versus P7F |
| cg12225220 | 0.601    | 0.346    | 0.255     | 0.012            | MAPK10                | Hypermethylated in P3F versus P7F |
| cg24673101 | 0.510    | 0.250    | 0.260     | 0.012            | CCDC85C               | Hypermethylated in P3F versus P7F |
| cg13840174 | 0.670    | 0.352    | 0.319     | 0.012            | NA                    | Hypermethylated in P3F versus P7F |
| cg20536041 | 0.592    | 0.307    | 0.285     | 0.012            | NA                    | Hypermethylated in P3F versus P7F |
| cg26132737 | 0.681    | 0.407    | 0.274     | 0.012            | NA                    | Hypermethylated in P3F versus P7F |
| cg00989853 | 0.490    | 0.234    | 0.257     | 0.012            | IRF6                  | Hypermethylated in P3F versus P7F |
| cg10494028 | 0.702    | 0.425    | 0.277     | 0.012            | NA                    | Hypermethylated in P3F versus P7F |
| cg02317299 | 0.467    | 0.199    | 0.268     | 0.012            | MYO1C                 | Hypermethylated in P3F versus P7F |

### Supplementary Table 3 (continued)

| Probe      | P3F.mean | P7F.mean | Mean.diff | Adjusted.P.value | Promoter.related.gene | Category                          |
|------------|----------|----------|-----------|------------------|-----------------------|-----------------------------------|
| cg08961196 | 0.610    | 0.354    | 0.256     | 0.012            | MFHAS1                | Hypermethylated in P3F versus P7F |
| cg23136742 | 0.706    | 0.446    | 0.260     | 0.012            | NA                    | Hypermethylated in P3F versus P7F |
| cg08006625 | 0.507    | 0.226    | 0.281     | 0.012            | NA                    | Hypermethylated in P3F versus P7F |
| cg10397678 | 0.629    | 0.352    | 0.277     | 0.012            | NA                    | Hypermethylated in P3F versus P7F |
| cg26631039 | 0.556    | 0.197    | 0.359     | 0.012            | NA                    | Hypermethylated in P3F versus P7F |
| cg11940726 | 0.673    | 0.380    | 0.293     | 0.012            | NA                    | Hypermethylated in P3F versus P7F |
| cg18869404 | 0.624    | 0.349    | 0.275     | 0.012            | NA                    | Hypermethylated in P3F versus P7F |
| cg11793699 | 0.682    | 0.338    | 0.344     | 0.012            | NA                    | Hypermethylated in P3F versus P7F |
| cg21907107 | 0.658    | 0.346    | 0.312     | 0.012            | NA                    | Hypermethylated in P3F versus P7F |
| cg19814981 | 0.731    | 0.476    | 0.255     | 0.012            | NA                    | Hypermethylated in P3F versus P7F |
| cg24082368 | 0.592    | 0.315    | 0.277     | 0.012            | NA                    | Hypermethylated in P3F versus P7F |
| cg25101225 | 0.779    | 0.517    | 0.262     | 0.012            | NA                    | Hypermethylated in P3F versus P7F |
| cg07279281 | 0.629    | 0.324    | 0.305     | 0.012            | ALS2CL                | Hypermethylated in P3F versus P7F |
| cg10886095 | 0.542    | 0.272    | 0.270     | 0.012            | NA                    | Hypermethylated in P3F versus P7F |
| cg27642470 | 0.724    | 0.448    | 0.276     | 0.012            | DCBLD1                | Hypermethylated in P3F versus P7F |
| cg14040131 | 0.610    | 0.360    | 0.250     | 0.012            | GPSM1                 | Hypermethylated in P3F versus P7F |
| cg12765064 | 0.710    | 0.400    | 0.310     | 0.012            | NA                    | Hypermethylated in P3F versus P7F |
| cg00143220 | 0.448    | 0.172    | 0.276     | 0.012            | NA                    | Hypermethylated in P3F versus P7F |
| cg27077033 | 0.652    | 0.377    | 0.276     | 0.012            | NA                    | Hypermethylated in P3F versus P7F |
| cg25417842 | 0.682    | 0.342    | 0.340     | 0.012            | NA                    | Hypermethylated in P3F versus P7F |
| cg26228577 | 0.476    | 0.195    | 0.281     | 0.012            | NA                    | Hypermethylated in P3F versus P7F |
| cg02606403 | 0.447    | 0.196    | 0.251     | 0.012            | LOC100132215          | Hypermethylated in P3F versus P7F |
| cg03655683 | 0.705    | 0.447    | 0.258     | 0.012            | NA                    | Hypermethylated in P3F versus P7F |
| cg24534926 | 0.526    | 0.275    | 0.251     | 0.012            | NA                    | Hypermethylated in P3F versus P7F |
| cg12670477 | 0.476    | 0.150    | 0.326     | 0.012            | NA                    | Hypermethylated in P3F versus P7F |

### Supplementary Table 3 (continued)

| Probe      | P3F.mean | P7F.mean | Mean.diff | Adjusted.P.value | Promoter.related.gene | Category                          |
|------------|----------|----------|-----------|------------------|-----------------------|-----------------------------------|
| cg19380499 | 0.490    | 0.204    | 0.286     | 0.012            | NA                    | Hypermethylated in P3F versus P7F |
| cg02091185 | 0.566    | 0.310    | 0.256     | 0.012            | RANBP17               | Hypermethylated in P3F versus P7F |
| cg21272465 | 0.493    | 0.220    | 0.273     | 0.012            | LOC643387             | Hypermethylated in P3F versus P7F |
| cg25167447 | 0.741    | 0.462    | 0.280     | 0.012            | NAV1                  | Hypermethylated in P3F versus P7F |
| cg25729166 | 0.616    | 0.338    | 0.278     | 0.012            | NA                    | Hypermethylated in P3F versus P7F |
| cg22644012 | 0.583    | 0.321    | 0.262     | 0.012            | NA                    | Hypermethylated in P3F versus P7F |
| cg05365033 | 0.690    | 0.396    | 0.294     | 0.012            | NA                    | Hypermethylated in P3F versus P7F |
| cg02915785 | 0.596    | 0.337    | 0.259     | 0.013            | NA                    | Hypermethylated in P3F versus P7F |
| cg00445126 | 0.507    | 0.201    | 0.305     | 0.013            | LOC100132215          | Hypermethylated in P3F versus P7F |
| cg06710900 | 0.479    | 0.218    | 0.260     | 0.013            | IQSEC1                | Hypermethylated in P3F versus P7F |
| cg10161111 | 0.612    | 0.347    | 0.265     | 0.013            | NA                    | Hypermethylated in P3F versus P7F |
| cg01832036 | 0.440    | 0.147    | 0.293     | 0.013            | DLX4                  | Hypermethylated in P3F versus P7F |
| cg04990724 | 0.539    | 0.221    | 0.318     | 0.013            | ALS2CL                | Hypermethylated in P3F versus P7F |
| cg09187933 | 0.379    | 0.094    | 0.285     | 0.013            | NA                    | Hypermethylated in P3F versus P7F |
| cg16556145 | 0.544    | 0.273    | 0.271     | 0.013            | CLDN10                | Hypermethylated in P3F versus P7F |
| cg08582485 | 0.624    | 0.348    | 0.276     | 0.013            | NA                    | Hypermethylated in P3F versus P7F |
| cg24317827 | 0.675    | 0.418    | 0.256     | 0.013            | NA                    | Hypermethylated in P3F versus P7F |
| cg04371726 | 0.524    | 0.236    | 0.289     | 0.013            | NA                    | Hypermethylated in P3F versus P7F |
| cg11144753 | 0.565    | 0.239    | 0.326     | 0.013            | NA                    | Hypermethylated in P3F versus P7F |
| cg23661204 | 0.491    | 0.195    | 0.295     | 0.013            | CD3EAP_PPP1R13L       | Hypermethylated in P3F versus P7F |
| cg24869272 | 0.488    | 0.170    | 0.318     | 0.013            | NA                    | Hypermethylated in P3F versus P7F |
| cg21178689 | 0.643    | 0.338    | 0.305     | 0.013            | NA                    | Hypermethylated in P3F versus P7F |
| cg19112895 | 0.574    | 0.263    | 0.311     | 0.013            | NA                    | Hypermethylated in P3F versus P7F |
| cg18224395 | 0.639    | 0.381    | 0.258     | 0.013            | NA                    | Hypermethylated in P3F versus P7F |
| cg10606029 | 0.581    | 0.255    | 0.325     | 0.013            | NA                    | Hypermethylated in P3F versus P7F |

### Supplementary Table 3 (continued)

| Probe      | P3F.mean | P7F.mean | Mean.diff | Adjusted.P.value | Promoter.related.gene | Category                          |
|------------|----------|----------|-----------|------------------|-----------------------|-----------------------------------|
| cg18912520 | 0.587    | 0.292    | 0.295     | 0.013            | NA                    | Hypermethylated in P3F versus P7F |
| cg06059056 | 0.521    | 0.214    | 0.307     | 0.013            | IQSEC1                | Hypermethylated in P3F versus P7F |
| cg15331332 | 0.569    | 0.312    | 0.256     | 0.013            | NA                    | Hypermethylated in P3F versus P7F |
| cg00995986 | 0.611    | 0.267    | 0.344     | 0.013            | NA                    | Hypermethylated in P3F versus P7F |
| cg08381274 | 0.496    | 0.243    | 0.253     | 0.013            | NA                    | Hypermethylated in P3F versus P7F |
| cg15147841 | 0.509    | 0.248    | 0.260     | 0.013            | NA                    | Hypermethylated in P3F versus P7F |
| cg19028462 | 0.643    | 0.334    | 0.309     | 0.013            | NA                    | Hypermethylated in P3F versus P7F |
| cg13442428 | 0.528    | 0.185    | 0.343     | 0.013            | USP2                  | Hypermethylated in P3F versus P7F |
| cg18126442 | 0.546    | 0.223    | 0.322     | 0.013            | LOC100132215          | Hypermethylated in P3F versus P7F |
| cg17138769 | 0.497    | 0.227    | 0.270     | 0.013            | NA                    | Hypermethylated in P3F versus P7F |
| cg18088494 | 0.479    | 0.163    | 0.316     | 0.013            | NA                    | Hypermethylated in P3F versus P7F |
| cg17933787 | 0.700    | 0.441    | 0.259     | 0.013            | NA                    | Hypermethylated in P3F versus P7F |
| cg05017199 | 0.403    | 0.144    | 0.259     | 0.013            | TMEM176B_TMEM176A     | Hypermethylated in P3F versus P7F |
| cg02245004 | 0.381    | 0.099    | 0.282     | 0.013            | NA                    | Hypermethylated in P3F versus P7F |
| cg23275958 | 0.564    | 0.256    | 0.308     | 0.013            | NA                    | Hypermethylated in P3F versus P7F |
| cg06006071 | 0.362    | 0.072    | 0.290     | 0.013            | NA                    | Hypermethylated in P3F versus P7F |
| cg23652859 | 0.509    | 0.257    | 0.252     | 0.013            | NA                    | Hypermethylated in P3F versus P7F |
| cg25419506 | 0.405    | 0.098    | 0.308     | 0.013            | EIF4EBP3              | Hypermethylated in P3F versus P7F |
| cg18007959 | 0.445    | 0.189    | 0.256     | 0.013            | NA                    | Hypermethylated in P3F versus P7F |
| cg02311725 | 0.629    | 0.378    | 0.251     | 0.013            | HCK                   | Hypermethylated in P3F versus P7F |
| cg26493054 | 0.417    | 0.159    | 0.258     | 0.013            | NA                    | Hypermethylated in P3F versus P7F |
| cg00562180 | 0.630    | 0.367    | 0.263     | 0.014            | NA                    | Hypermethylated in P3F versus P7F |
| cg16190388 | 0.612    | 0.358    | 0.254     | 0.014            | NA                    | Hypermethylated in P3F versus P7F |
| cg02004337 | 0.628    | 0.352    | 0.276     | 0.014            | NA                    | Hypermethylated in P3F versus P7F |
| cg04483711 | 0.562    | 0.269    | 0.293     | 0.014            | NA                    | Hypermethylated in P3F versus P7F |



### Supplementary Table 3 (continued)

| Probe      | P3F.mean | P7F.mean | Mean.diff | Adjusted.P.value | Promoter.related.gene | Category                          |
|------------|----------|----------|-----------|------------------|-----------------------|-----------------------------------|
| cg08557246 | 0.547    | 0.281    | 0.266     | 0.014            | NA                    | Hypermethylated in P3F versus P7F |
| cg11418389 | 0.639    | 0.332    | 0.307     | 0.014            | NA                    | Hypermethylated in P3F versus P7F |
| cg19203457 | 0.505    | 0.253    | 0.253     | 0.014            | NA                    | Hypermethylated in P3F versus P7F |
| cg25650076 | 0.582    | 0.297    | 0.285     | 0.014            | NA                    | Hypermethylated in P3F versus P7F |
| cg04527018 | 0.738    | 0.473    | 0.265     | 0.014            | NA                    | Hypermethylated in P3F versus P7F |
| cg11178337 | 0.715    | 0.426    | 0.288     | 0.014            | NA                    | Hypermethylated in P3F versus P7F |
| cg03388266 | 0.727    | 0.473    | 0.255     | 0.014            | NA                    | Hypermethylated in P3F versus P7F |
| cg23319601 | 0.473    | 0.195    | 0.278     | 0.014            | NA                    | Hypermethylated in P3F versus P7F |
| cg00030422 | 0.465    | 0.210    | 0.255     | 0.014            | DLEC1                 | Hypermethylated in P3F versus P7F |
| cg25520679 | 0.531    | 0.239    | 0.292     | 0.014            | HIC1                  | Hypermethylated in P3F versus P7F |
| cg14918082 | 0.646    | 0.298    | 0.348     | 0.014            | KCNAB3                | Hypermethylated in P3F versus P7F |
| cg14840351 | 0.472    | 0.201    | 0.271     | 0.014            | NA                    | Hypermethylated in P3F versus P7F |
| cg21227867 | 0.631    | 0.374    | 0.257     | 0.014            | NA                    | Hypermethylated in P3F versus P7F |
| cg22132982 | 0.647    | 0.384    | 0.263     | 0.014            | NA                    | Hypermethylated in P3F versus P7F |
| cg06246357 | 0.738    | 0.418    | 0.319     | 0.014            | NA                    | Hypermethylated in P3F versus P7F |
| cg12702354 | 0.731    | 0.447    | 0.284     | 0.014            | NA                    | Hypermethylated in P3F versus P7F |
| cg08408994 | 0.656    | 0.312    | 0.345     | 0.014            | NA                    | Hypermethylated in P3F versus P7F |
| cg23709902 | 0.441    | 0.180    | 0.261     | 0.014            | NA                    | Hypermethylated in P3F versus P7F |
| cg20286236 | 0.676    | 0.338    | 0.338     | 0.014            | MIR193A               | Hypermethylated in P3F versus P7F |
| cg10322504 | 0.552    | 0.269    | 0.283     | 0.014            | NA                    | Hypermethylated in P3F versus P7F |
| cg05622465 | 0.527    | 0.273    | 0.254     | 0.014            | ALX3                  | Hypermethylated in P3F versus P7F |
| cg19921279 | 0.488    | 0.198    | 0.290     | 0.014            | TSSK3                 | Hypermethylated in P3F versus P7F |
| cg08455099 | 0.634    | 0.313    | 0.322     | 0.014            | NA                    | Hypermethylated in P3F versus P7F |
| cg16683770 | 0.443    | 0.161    | 0.283     | 0.014            | NA                    | Hypermethylated in P3F versus P7F |
| cg08935125 | 0.702    | 0.433    | 0.269     | 0.014            | NA                    | Hypermethylated in P3F versus P7F |

### Supplementary Table 3 (continued)

| Probe      | P3F.mean | P7F.mean | Mean.diff | Adjusted.P.value | Promoter.related.gene | Category                          |
|------------|----------|----------|-----------|------------------|-----------------------|-----------------------------------|
| cg06422471 | 0.384    | 0.124    | 0.259     | 0.014            | NA                    | Hypermethylated in P3F versus P7F |
| cg03609088 | 0.575    | 0.308    | 0.267     | 0.014            | NA                    | Hypermethylated in P3F versus P7F |
| cg12406391 | 0.403    | 0.143    | 0.260     | 0.014            | NA                    | Hypermethylated in P3F versus P7F |
| cg26612230 | 0.790    | 0.522    | 0.268     | 0.014            | NA                    | Hypermethylated in P3F versus P7F |
| cg16703762 | 0.665    | 0.370    | 0.294     | 0.014            | NA                    | Hypermethylated in P3F versus P7F |
| cg08327690 | 0.360    | 0.094    | 0.266     | 0.014            | NA                    | Hypermethylated in P3F versus P7F |
| cg16535493 | 0.632    | 0.355    | 0.277     | 0.014            | GRB10                 | Hypermethylated in P3F versus P7F |
| cg13713830 | 0.487    | 0.212    | 0.275     | 0.014            | NA                    | Hypermethylated in P3F versus P7F |
| cg08877617 | 0.487    | 0.198    | 0.288     | 0.014            | SLC12A4               | Hypermethylated in P3F versus P7F |
| cg25977938 | 0.756    | 0.501    | 0.255     | 0.015            | NA                    | Hypermethylated in P3F versus P7F |
| cg17109725 | 0.480    | 0.189    | 0.292     | 0.015            | NA                    | Hypermethylated in P3F versus P7F |
| cg07197785 | 0.452    | 0.164    | 0.288     | 0.015            | NA                    | Hypermethylated in P3F versus P7F |
| cg22783363 | 0.550    | 0.261    | 0.289     | 0.015            | TNFRSF10D             | Hypermethylated in P3F versus P7F |
| cg21165519 | 0.634    | 0.374    | 0.260     | 0.015            | NA                    | Hypermethylated in P3F versus P7F |
| cg13530938 | 0.689    | 0.427    | 0.262     | 0.015            | LOC643387             | Hypermethylated in P3F versus P7F |
| cg19895894 | 0.703    | 0.397    | 0.305     | 0.015            | NA                    | Hypermethylated in P3F versus P7F |
| cg01363714 | 0.692    | 0.400    | 0.293     | 0.015            | NA                    | Hypermethylated in P3F versus P7F |
| cg04406111 | 0.550    | 0.287    | 0.262     | 0.015            | NA                    | Hypermethylated in P3F versus P7F |
| cg03170698 | 0.663    | 0.329    | 0.334     | 0.015            | DYSF                  | Hypermethylated in P3F versus P7F |
| cg09234672 | 0.563    | 0.293    | 0.269     | 0.015            | NA                    | Hypermethylated in P3F versus P7F |
| cg27401543 | 0.648    | 0.396    | 0.252     | 0.015            | NA                    | Hypermethylated in P3F versus P7F |
| cg18507379 | 0.496    | 0.241    | 0.255     | 0.015            | PCDHGB6               | Hypermethylated in P3F versus P7F |
| cg27162435 | 0.684    | 0.363    | 0.321     | 0.015            | KCNAB3                | Hypermethylated in P3F versus P7F |
| cg02827132 | 0.809    | 0.543    | 0.266     | 0.015            | NA                    | Hypermethylated in P3F versus P7F |
| cg02486086 | 0.637    | 0.282    | 0.354     | 0.015            | NA                    | Hypermethylated in P3F versus P7F |

### Supplementary Table 3 (continued)

| Probe      | P3F.mean | P7F.mean | Mean.diff | Adjusted.P.value | Promoter.related.gene | Category                          |
|------------|----------|----------|-----------|------------------|-----------------------|-----------------------------------|
| cg25597894 | 0.342    | 0.076    | 0.266     | 0.015            | NA                    | Hypermethylated in P3F versus P7F |
| cg03356595 | 0.606    | 0.284    | 0.323     | 0.015            | NA                    | Hypermethylated in P3F versus P7F |
| cg16236270 | 0.533    | 0.253    | 0.280     | 0.015            | NA                    | Hypermethylated in P3F versus P7F |
| cg11471802 | 0.793    | 0.531    | 0.262     | 0.015            | NA                    | Hypermethylated in P3F versus P7F |
| cg04548856 | 0.739    | 0.454    | 0.285     | 0.015            | NA                    | Hypermethylated in P3F versus P7F |
| cg01435643 | 0.485    | 0.226    | 0.260     | 0.015            | NA                    | Hypermethylated in P3F versus P7F |
| cg22764044 | 0.545    | 0.242    | 0.303     | 0.015            | RUFY1                 | Hypermethylated in P3F versus P7F |
| cg24871414 | 0.631    | 0.295    | 0.336     | 0.015            | NA                    | Hypermethylated in P3F versus P7F |
| cg19585156 | 0.452    | 0.133    | 0.319     | 0.015            | NA                    | Hypermethylated in P3F versus P7F |
| cg11459266 | 0.667    | 0.399    | 0.268     | 0.015            | NA                    | Hypermethylated in P3F versus P7F |
| cg25297255 | 0.603    | 0.347    | 0.257     | 0.015            | NA                    | Hypermethylated in P3F versus P7F |
| cg17981058 | 0.714    | 0.436    | 0.278     | 0.015            | NA                    | Hypermethylated in P3F versus P7F |
| cg22481960 | 0.600    | 0.281    | 0.319     | 0.015            | NA                    | Hypermethylated in P3F versus P7F |
| cg16593628 | 0.594    | 0.315    | 0.280     | 0.015            | NA                    | Hypermethylated in P3F versus P7F |
| cg14122138 | 0.401    | 0.128    | 0.272     | 0.015            | NA                    | Hypermethylated in P3F versus P7F |
| cg24335138 | 0.549    | 0.212    | 0.337     | 0.015            | NA                    | Hypermethylated in P3F versus P7F |
| cg06575144 | 0.443    | 0.172    | 0.271     | 0.015            | NA                    | Hypermethylated in P3F versus P7F |
| cg01916088 | 0.678    | 0.366    | 0.312     | 0.015            | NA                    | Hypermethylated in P3F versus P7F |
| cg19455322 | 0.722    | 0.458    | 0.265     | 0.015            | ALS2CL                | Hypermethylated in P3F versus P7F |
| cg02905426 | 0.756    | 0.502    | 0.254     | 0.015            | FAM76A                | Hypermethylated in P3F versus P7F |
| cg05361373 | 0.567    | 0.266    | 0.300     | 0.015            | PYCARD                | Hypermethylated in P3F versus P7F |
| cg11092487 | 0.652    | 0.378    | 0.274     | 0.015            | NA                    | Hypermethylated in P3F versus P7F |
| cg04603130 | 0.555    | 0.297    | 0.258     | 0.015            | NA                    | Hypermethylated in P3F versus P7F |
| cg14473344 | 0.436    | 0.175    | 0.260     | 0.015            | NA                    | Hypermethylated in P3F versus P7F |
| cg01965874 | 0.585    | 0.322    | 0.263     | 0.015            | NA                    | Hypermethylated in P3F versus P7F |

### Supplementary Table 3 (continued)

| Probe      | P3F.mean | P7F.mean | Mean.diff | Adjusted.P.value | Promoter.related.gene | Category                          |
|------------|----------|----------|-----------|------------------|-----------------------|-----------------------------------|
| cg07510423 | 0.552    | 0.241    | 0.311     | 0.016            | C2orf40               | Hypermethylated in P3F versus P7F |
| cg16788286 | 0.556    | 0.213    | 0.343     | 0.016            | NA                    | Hypermethylated in P3F versus P7F |
| cg15092343 | 0.762    | 0.461    | 0.301     | 0.016            | MSX1                  | Hypermethylated in P3F versus P7F |
| cg26338947 | 0.499    | 0.231    | 0.268     | 0.016            | NA                    | Hypermethylated in P3F versus P7F |
| cg12848808 | 0.765    | 0.502    | 0.263     | 0.016            | NA                    | Hypermethylated in P3F versus P7F |
| cg17631451 | 0.613    | 0.352    | 0.261     | 0.016            | TREX1                 | Hypermethylated in P3F versus P7F |
| cg14872952 | 0.510    | 0.189    | 0.321     | 0.016            | NA                    | Hypermethylated in P3F versus P7F |
| cg14397171 | 0.620    | 0.351    | 0.269     | 0.016            | NA                    | Hypermethylated in P3F versus P7F |
| cg08425203 | 0.615    | 0.315    | 0.299     | 0.016            | NA                    | Hypermethylated in P3F versus P7F |
| cg14020762 | 0.509    | 0.213    | 0.296     | 0.016            | NA                    | Hypermethylated in P3F versus P7F |
| cg00073837 | 0.586    | 0.327    | 0.259     | 0.016            | NA                    | Hypermethylated in P3F versus P7F |
| cg08473330 | 0.640    | 0.365    | 0.275     | 0.016            | NA                    | Hypermethylated in P3F versus P7F |
| cg09698465 | 0.623    | 0.343    | 0.280     | 0.016            | NA                    | Hypermethylated in P3F versus P7F |
| cg14435098 | 0.545    | 0.291    | 0.254     | 0.016            | NA                    | Hypermethylated in P3F versus P7F |
| cg03899721 | 0.887    | 0.621    | 0.266     | 0.016            | MFHAS1                | Hypermethylated in P3F versus P7F |
| cg27179622 | 0.627    | 0.338    | 0.289     | 0.016            | NA                    | Hypermethylated in P3F versus P7F |
| cg13407335 | 0.672    | 0.307    | 0.365     | 0.016            | KCNAB3                | Hypermethylated in P3F versus P7F |
| cg13885561 | 0.623    | 0.337    | 0.287     | 0.016            | KCNQ1DN               | Hypermethylated in P3F versus P7F |
| cg09947795 | 0.767    | 0.516    | 0.250     | 0.016            | NA                    | Hypermethylated in P3F versus P7F |
| cg06223539 | 0.450    | 0.194    | 0.256     | 0.016            | NA                    | Hypermethylated in P3F versus P7F |
| cg04792330 | 0.564    | 0.254    | 0.310     | 0.016            | NA                    | Hypermethylated in P3F versus P7F |
| cg17573301 | 0.549    | 0.227    | 0.322     | 0.016            | NA                    | Hypermethylated in P3F versus P7F |
| cg11857997 | 0.663    | 0.358    | 0.305     | 0.016            | NA                    | Hypermethylated in P3F versus P7F |
| cg16430687 | 0.601    | 0.335    | 0.266     | 0.016            | NA                    | Hypermethylated in P3F versus P7F |
| cg11639849 | 0.611    | 0.277    | 0.334     | 0.016            | NA                    | Hypermethylated in P3F versus P7F |

### Supplementary Table 3 (continued)

| Probe      | P3F.mean | P7F.mean | Mean.diff | Adjusted.P.value | Promoter.related.gene | Category                          |
|------------|----------|----------|-----------|------------------|-----------------------|-----------------------------------|
| cg26084484 | 0.320    | 0.050    | 0.269     | 0.016            | EIF4EBP3              | Hypermethylated in P3F versus P7F |
| cg12071544 | 0.721    | 0.438    | 0.284     | 0.016            | NA                    | Hypermethylated in P3F versus P7F |
| cg19236794 | 0.489    | 0.217    | 0.271     | 0.016            | NA                    | Hypermethylated in P3F versus P7F |
| cg09714458 | 0.557    | 0.292    | 0.265     | 0.016            | NA                    | Hypermethylated in P3F versus P7F |
| cg14460195 | 0.615    | 0.320    | 0.296     | 0.016            | NA                    | Hypermethylated in P3F versus P7F |
| cg01665555 | 0.566    | 0.280    | 0.286     | 0.016            | PAX6                  | Hypermethylated in P3F versus P7F |
| cg15177855 | 0.652    | 0.389    | 0.264     | 0.016            | NA                    | Hypermethylated in P3F versus P7F |
| cg07815836 | 0.646    | 0.394    | 0.252     | 0.016            | NA                    | Hypermethylated in P3F versus P7F |
| cg05071974 | 0.355    | 0.077    | 0.278     | 0.016            | EIF4EBP3              | Hypermethylated in P3F versus P7F |
| cg19044229 | 0.522    | 0.242    | 0.280     | 0.016            | NA                    | Hypermethylated in P3F versus P7F |
| cg11031064 | 0.381    | 0.108    | 0.272     | 0.016            | NA                    | Hypermethylated in P3F versus P7F |
| cg03822639 | 0.604    | 0.354    | 0.250     | 0.016            | PALLD                 | Hypermethylated in P3F versus P7F |
| cg25270574 | 0.661    | 0.381    | 0.280     | 0.016            | NA                    | Hypermethylated in P3F versus P7F |
| cg01716827 | 0.666    | 0.398    | 0.267     | 0.016            | NA                    | Hypermethylated in P3F versus P7F |
| cg25844605 | 0.530    | 0.241    | 0.289     | 0.016            | LOC149837             | Hypermethylated in P3F versus P7F |
| cg01797488 | 0.494    | 0.190    | 0.303     | 0.017            | LOC440461             | Hypermethylated in P3F versus P7F |
| cg16151451 | 0.489    | 0.219    | 0.270     | 0.017            | NA                    | Hypermethylated in P3F versus P7F |
| cg25130385 | 0.469    | 0.204    | 0.266     | 0.017            | NA                    | Hypermethylated in P3F versus P7F |
| cg04798016 | 0.567    | 0.228    | 0.339     | 0.017            | NA                    | Hypermethylated in P3F versus P7F |
| cg24112010 | 0.661    | 0.405    | 0.256     | 0.017            | NA                    | Hypermethylated in P3F versus P7F |
| cg17220278 | 0.755    | 0.443    | 0.313     | 0.017            | NA                    | Hypermethylated in P3F versus P7F |
| cg17029019 | 0.551    | 0.213    | 0.338     | 0.017            | HIC1                  | Hypermethylated in P3F versus P7F |
| cg21464704 | 0.707    | 0.441    | 0.267     | 0.017            | NA                    | Hypermethylated in P3F versus P7F |
| cg00921266 | 0.450    | 0.172    | 0.278     | 0.017            | HOXA3                 | Hypermethylated in P3F versus P7F |
| cg15361373 | 0.489    | 0.219    | 0.270     | 0.017            | NA                    | Hypermethylated in P3F versus P7F |

### Supplementary Table 3 (continued)

| Probe      | P3F.mean | P7F.mean | Mean.diff | Adjusted.P.value | Promoter.related.gene | Category                          |
|------------|----------|----------|-----------|------------------|-----------------------|-----------------------------------|
| cg17171215 | 0.640    | 0.351    | 0.289     | 0.017            | NA                    | Hypermethylated in P3F versus P7F |
| cg13539205 | 0.577    | 0.317    | 0.260     | 0.017            | NA                    | Hypermethylated in P3F versus P7F |
| cg22129545 | 0.523    | 0.214    | 0.309     | 0.017            | UCN                   | Hypermethylated in P3F versus P7F |
| cg11841771 | 0.499    | 0.240    | 0.259     | 0.017            | NA                    | Hypermethylated in P3F versus P7F |
| cg12989851 | 0.514    | 0.258    | 0.256     | 0.017            | NA                    | Hypermethylated in P3F versus P7F |
| cg15679064 | 0.636    | 0.372    | 0.264     | 0.017            | NA                    | Hypermethylated in P3F versus P7F |
| cg04861869 | 0.711    | 0.413    | 0.297     | 0.017            | NA                    | Hypermethylated in P3F versus P7F |
| cg06837311 | 0.342    | 0.084    | 0.258     | 0.017            | NA                    | Hypermethylated in P3F versus P7F |
| cg24465224 | 0.583    | 0.303    | 0.280     | 0.017            | NA                    | Hypermethylated in P3F versus P7F |
| cg15872458 | 0.678    | 0.397    | 0.281     | 0.017            | NA                    | Hypermethylated in P3F versus P7F |
| cg07592361 | 0.483    | 0.212    | 0.271     | 0.017            | NA                    | Hypermethylated in P3F versus P7F |
| cg09587549 | 0.563    | 0.282    | 0.281     | 0.017            | PYCARD                | Hypermethylated in P3F versus P7F |
| cg19157853 | 0.683    | 0.401    | 0.282     | 0.017            | NA                    | Hypermethylated in P3F versus P7F |
| cg03431741 | 0.605    | 0.340    | 0.265     | 0.017            | NA                    | Hypermethylated in P3F versus P7F |
| cg10188048 | 0.528    | 0.248    | 0.280     | 0.017            | NA                    | Hypermethylated in P3F versus P7F |
| cg01763890 | 0.648    | 0.393    | 0.255     | 0.018            | NA                    | Hypermethylated in P3F versus P7F |
| cg26365545 | 0.574    | 0.296    | 0.277     | 0.018            | NA                    | Hypermethylated in P3F versus P7F |
| cg17302155 | 0.519    | 0.237    | 0.282     | 0.018            | NA                    | Hypermethylated in P3F versus P7F |
| cg04564481 | 0.649    | 0.379    | 0.269     | 0.018            | CYP26C1               | Hypermethylated in P3F versus P7F |
| cg18451016 | 0.495    | 0.171    | 0.324     | 0.018            | NA                    | Hypermethylated in P3F versus P7F |
| cg18755846 | 0.491    | 0.213    | 0.278     | 0.018            | NA                    | Hypermethylated in P3F versus P7F |
| cg12537329 | 0.630    | 0.351    | 0.279     | 0.018            | NA                    | Hypermethylated in P3F versus P7F |
| cg03885037 | 0.442    | 0.190    | 0.252     | 0.018            | NA                    | Hypermethylated in P3F versus P7F |
| cg00530568 | 0.749    | 0.499    | 0.250     | 0.018            | NA                    | Hypermethylated in P3F versus P7F |
| cg22625519 | 0.721    | 0.459    | 0.261     | 0.018            | NA                    | Hypermethylated in P3F versus P7F |

### Supplementary Table 3 (continued)

| Probe      | P3F.mean | P7F.mean | Mean.diff | Adjusted.P.value | Promoter.related.gene | Category                          |
|------------|----------|----------|-----------|------------------|-----------------------|-----------------------------------|
| cg04025970 | 0.633    | 0.351    | 0.282     | 0.018            | NA                    | Hypermethylated in P3F versus P7F |
| cg11816841 | 0.672    | 0.348    | 0.324     | 0.018            | NA                    | Hypermethylated in P3F versus P7F |
| cg27316598 | 0.632    | 0.380    | 0.252     | 0.018            | NA                    | Hypermethylated in P3F versus P7F |
| cg17421241 | 0.629    | 0.376    | 0.253     | 0.018            | NA                    | Hypermethylated in P3F versus P7F |
| cg03995122 | 0.631    | 0.329    | 0.302     | 0.018            | HCG4P6                | Hypermethylated in P3F versus P7F |
| cg09681167 | 0.670    | 0.395    | 0.276     | 0.018            | GBX2                  | Hypermethylated in P3F versus P7F |
| cg13833437 | 0.517    | 0.258    | 0.259     | 0.018            | UCN                   | Hypermethylated in P3F versus P7F |
| cg14169333 | 0.560    | 0.231    | 0.330     | 0.018            | NA                    | Hypermethylated in P3F versus P7F |
| cg03415617 | 0.595    | 0.337    | 0.257     | 0.018            | NA                    | Hypermethylated in P3F versus P7F |
| cg14120049 | 0.695    | 0.444    | 0.251     | 0.018            | NA                    | Hypermethylated in P3F versus P7F |
| cg02478907 | 0.704    | 0.452    | 0.252     | 0.018            | BAI1                  | Hypermethylated in P3F versus P7F |
| cg24027068 | 0.710    | 0.446    | 0.264     | 0.018            | NA                    | Hypermethylated in P3F versus P7F |
| cg09866102 | 0.667    | 0.368    | 0.298     | 0.019            | PYCARD                | Hypermethylated in P3F versus P7F |
| cg17514558 | 0.686    | 0.417    | 0.269     | 0.019            | NA                    | Hypermethylated in P3F versus P7F |
| cg15155463 | 0.646    | 0.389    | 0.257     | 0.019            | DYSF                  | Hypermethylated in P3F versus P7F |
| cg17039236 | 0.612    | 0.343    | 0.268     | 0.019            | NA                    | Hypermethylated in P3F versus P7F |
| cg14535068 | 0.375    | 0.109    | 0.267     | 0.019            | NA                    | Hypermethylated in P3F versus P7F |
| cg01181307 | 0.616    | 0.355    | 0.261     | 0.019            | BRF1_BTBD6            | Hypermethylated in P3F versus P7F |
| cg16640865 | 0.659    | 0.346    | 0.313     | 0.019            | NA                    | Hypermethylated in P3F versus P7F |
| cg18675097 | 0.657    | 0.391    | 0.267     | 0.019            | NKAPL                 | Hypermethylated in P3F versus P7F |
| cg14655994 | 0.648    | 0.397    | 0.251     | 0.019            | NA                    | Hypermethylated in P3F versus P7F |
| cg06705862 | 0.640    | 0.369    | 0.271     | 0.019            | NA                    | Hypermethylated in P3F versus P7F |
| cg13682095 | 0.413    | 0.102    | 0.311     | 0.019            | NA                    | Hypermethylated in P3F versus P7F |
| cg24690231 | 0.503    | 0.230    | 0.273     | 0.019            | NA                    | Hypermethylated in P3F versus P7F |
| cg10002185 | 0.579    | 0.308    | 0.271     | 0.019            | NA                    | Hypermethylated in P3F versus P7F |

### Supplementary Table 3 (continued)

| Probe      | P3F.mean | P7F.mean | Mean.diff | Adjusted.P.value | Promoter.related.gene | Category                          |
|------------|----------|----------|-----------|------------------|-----------------------|-----------------------------------|
| cg03764092 | 0.642    | 0.317    | 0.326     | 0.019            | NA                    | Hypermethylated in P3F versus P7F |
| cg15566554 | 0.443    | 0.172    | 0.271     | 0.019            | TTYH2                 | Hypermethylated in P3F versus P7F |
| cg21730805 | 0.603    | 0.346    | 0.257     | 0.019            | NA                    | Hypermethylated in P3F versus P7F |
| cg25896644 | 0.442    | 0.190    | 0.252     | 0.019            | NA                    | Hypermethylated in P3F versus P7F |
| cg24912415 | 0.640    | 0.370    | 0.271     | 0.020            | NA                    | Hypermethylated in P3F versus P7F |
| cg13462219 | 0.600    | 0.321    | 0.279     | 0.020            | NA                    | Hypermethylated in P3F versus P7F |
| cg05645812 | 0.394    | 0.141    | 0.253     | 0.020            | NA                    | Hypermethylated in P3F versus P7F |
| cg11251614 | 0.694    | 0.412    | 0.283     | 0.020            | NA                    | Hypermethylated in P3F versus P7F |
| cg16101739 | 0.498    | 0.239    | 0.259     | 0.020            | NA                    | Hypermethylated in P3F versus P7F |
| cg23882658 | 0.450    | 0.162    | 0.288     | 0.020            | HIC1                  | Hypermethylated in P3F versus P7F |
| cg09661951 | 0.693    | 0.397    | 0.296     | 0.020            | NA                    | Hypermethylated in P3F versus P7F |
| cg19619416 | 0.669    | 0.410    | 0.259     | 0.020            | NA                    | Hypermethylated in P3F versus P7F |
| cg05875410 | 0.620    | 0.354    | 0.267     | 0.020            | NA                    | Hypermethylated in P3F versus P7F |
| cg01673674 | 0.646    | 0.395    | 0.251     | 0.020            | NA                    | Hypermethylated in P3F versus P7F |
| cg00807586 | 0.647    | 0.360    | 0.287     | 0.020            | DLEC1                 | Hypermethylated in P3F versus P7F |
| cg05457628 | 0.519    | 0.227    | 0.292     | 0.020            | RUFY1                 | Hypermethylated in P3F versus P7F |
| cg12110980 | 0.538    | 0.279    | 0.259     | 0.020            | NA                    | Hypermethylated in P3F versus P7F |
| cg10102242 | 0.551    | 0.285    | 0.266     | 0.020            | NA                    | Hypermethylated in P3F versus P7F |
| cg01323777 | 0.689    | 0.336    | 0.354     | 0.020            | KCNAB3                | Hypermethylated in P3F versus P7F |
| cg02732915 | 0.747    | 0.466    | 0.282     | 0.020            | NA                    | Hypermethylated in P3F versus P7F |
| cg25016544 | 0.540    | 0.284    | 0.256     | 0.020            | NA                    | Hypermethylated in P3F versus P7F |
| cg13850380 | 0.522    | 0.236    | 0.287     | 0.020            | NA                    | Hypermethylated in P3F versus P7F |
| cg14602530 | 0.606    | 0.304    | 0.301     | 0.020            | NA                    | Hypermethylated in P3F versus P7F |
| cg01313904 | 0.701    | 0.361    | 0.340     | 0.020            | NA                    | Hypermethylated in P3F versus P7F |
| cg06395414 | 0.543    | 0.270    | 0.273     | 0.020            | NA                    | Hypermethylated in P3F versus P7F |



### Supplementary Table 3 (continued)

| Probe      | P3F.mean | P7F.mean | Mean.diff | Adjusted.P.value | Promoter.related.gene | Category                          |
|------------|----------|----------|-----------|------------------|-----------------------|-----------------------------------|
| cg18653560 | 0.867    | 0.593    | 0.274     | 0.020            | NA                    | Hypermethylated in P3F versus P7F |
| cg03096126 | 0.481    | 0.200    | 0.281     | 0.020            | NA                    | Hypermethylated in P3F versus P7F |
| cg19619174 | 0.619    | 0.339    | 0.280     | 0.020            | NA                    | Hypermethylated in P3F versus P7F |
| cg02633761 | 0.371    | 0.110    | 0.261     | 0.020            | IQSEC1                | Hypermethylated in P3F versus P7F |
| cg10508317 | 0.552    | 0.240    | 0.312     | 0.021            | NA                    | Hypermethylated in P3F versus P7F |
| cg21097283 | 0.550    | 0.293    | 0.257     | 0.021            | OTP                   | Hypermethylated in P3F versus P7F |
| cg09073799 | 0.462    | 0.182    | 0.281     | 0.021            | NA                    | Hypermethylated in P3F versus P7F |
| cg11144056 | 0.308    | 0.054    | 0.255     | 0.021            | HIC1                  | Hypermethylated in P3F versus P7F |
| cg12417362 | 0.606    | 0.321    | 0.285     | 0.021            | NAV1                  | Hypermethylated in P3F versus P7F |
| cg16336586 | 0.630    | 0.367    | 0.263     | 0.021            | NA                    | Hypermethylated in P3F versus P7F |
| cg01047586 | 0.795    | 0.539    | 0.256     | 0.021            | NA                    | Hypermethylated in P3F versus P7F |
| cg09318508 | 0.599    | 0.329    | 0.270     | 0.021            | DYSF                  | Hypermethylated in P3F versus P7F |
| cg25810938 | 0.393    | 0.100    | 0.293     | 0.021            | NA                    | Hypermethylated in P3F versus P7F |
| cg12046758 | 0.608    | 0.273    | 0.335     | 0.021            | NA                    | Hypermethylated in P3F versus P7F |
| cg26516362 | 0.554    | 0.241    | 0.313     | 0.021            | RUFY1                 | Hypermethylated in P3F versus P7F |
| cg27136740 | 0.483    | 0.216    | 0.266     | 0.021            | NA                    | Hypermethylated in P3F versus P7F |
| cg02488129 | 0.578    | 0.318    | 0.259     | 0.021            | NA                    | Hypermethylated in P3F versus P7F |
| cg14535980 | 0.568    | 0.311    | 0.257     | 0.022            | C2orf40               | Hypermethylated in P3F versus P7F |
| cg13720865 | 0.553    | 0.290    | 0.262     | 0.022            | NA                    | Hypermethylated in P3F versus P7F |
| cg16065538 | 0.518    | 0.256    | 0.262     | 0.022            | NA                    | Hypermethylated in P3F versus P7F |
| cg07357157 | 0.618    | 0.351    | 0.267     | 0.022            | NA                    | Hypermethylated in P3F versus P7F |
| cg09313745 | 0.732    | 0.453    | 0.280     | 0.022            | NA                    | Hypermethylated in P3F versus P7F |
| cg06299284 | 0.636    | 0.330    | 0.307     | 0.022            | DRD4                  | Hypermethylated in P3F versus P7F |
| cg17508991 | 0.516    | 0.221    | 0.295     | 0.022            | HCK                   | Hypermethylated in P3F versus P7F |
| cg01962676 | 0.462    | 0.156    | 0.306     | 0.022            | NA                    | Hypermethylated in P3F versus P7F |

### Supplementary Table 3 (continued)

| Probe      | P3F.mean | P7F.mean | Mean.diff | Adjusted.P.value | Promoter.related.gene | Category                          |
|------------|----------|----------|-----------|------------------|-----------------------|-----------------------------------|
| cg06728252 | 0.509    | 0.228    | 0.281     | 0.022            | NA                    | Hypermethylated in P3F versus P7F |
| cg15174117 | 0.629    | 0.349    | 0.280     | 0.022            | NA                    | Hypermethylated in P3F versus P7F |
| cg10325383 | 0.603    | 0.347    | 0.255     | 0.022            | NA                    | Hypermethylated in P3F versus P7F |
| cg16438688 | 0.632    | 0.359    | 0.272     | 0.022            | NA                    | Hypermethylated in P3F versus P7F |
| cg21017569 | 0.725    | 0.401    | 0.324     | 0.022            | KCNAB3                | Hypermethylated in P3F versus P7F |
| cg15564444 | 0.568    | 0.273    | 0.295     | 0.022            | NA                    | Hypermethylated in P3F versus P7F |
| cg00143249 | 0.548    | 0.282    | 0.266     | 0.022            | NA                    | Hypermethylated in P3F versus P7F |
| cg24091371 | 0.456    | 0.179    | 0.276     | 0.022            | XKR8                  | Hypermethylated in P3F versus P7F |
| cg05113840 | 0.546    | 0.281    | 0.265     | 0.022            | NA                    | Hypermethylated in P3F versus P7F |
| cg11767181 | 0.430    | 0.127    | 0.303     | 0.022            | NA                    | Hypermethylated in P3F versus P7F |
| cg05113927 | 0.497    | 0.184    | 0.313     | 0.023            | UCN                   | Hypermethylated in P3F versus P7F |
| cg15861585 | 0.372    | 0.117    | 0.255     | 0.023            | DRD4                  | Hypermethylated in P3F versus P7F |
| cg16570157 | 0.668    | 0.376    | 0.292     | 0.023            | NA                    | Hypermethylated in P3F versus P7F |
| cg00981994 | 0.607    | 0.355    | 0.253     | 0.023            | NA                    | Hypermethylated in P3F versus P7F |
| cg23401796 | 0.644    | 0.363    | 0.281     | 0.023            | NA                    | Hypermethylated in P3F versus P7F |
| cg22197050 | 0.552    | 0.299    | 0.252     | 0.023            | LOC100132215          | Hypermethylated in P3F versus P7F |
| cg25416067 | 0.660    | 0.407    | 0.253     | 0.023            | 9-Sep                 | Hypermethylated in P3F versus P7F |
| cg00486340 | 0.654    | 0.396    | 0.258     | 0.023            | MSX1                  | Hypermethylated in P3F versus P7F |
| cg21545862 | 0.659    | 0.311    | 0.348     | 0.024            | NA                    | Hypermethylated in P3F versus P7F |
| cg12727398 | 0.604    | 0.277    | 0.326     | 0.024            | NA                    | Hypermethylated in P3F versus P7F |
| cg15028052 | 0.349    | 0.096    | 0.254     | 0.024            | UCKL1                 | Hypermethylated in P3F versus P7F |
| cg17416280 | 0.299    | 0.047    | 0.253     | 0.024            | HIC1                  | Hypermethylated in P3F versus P7F |
| cg11027058 | 0.661    | 0.344    | 0.317     | 0.024            | DYSF                  | Hypermethylated in P3F versus P7F |
| cg07687548 | 0.447    | 0.150    | 0.296     | 0.024            | NA                    | Hypermethylated in P3F versus P7F |
| cg06186450 | 0.503    | 0.244    | 0.259     | 0.024            | SHC1                  | Hypermethylated in P3F versus P7F |

### Supplementary Table 3 (continued)

| Probe      | P3F.mean | P7F.mean | Mean.diff | Adjusted.P.value | Promoter.related.gene | Category                          |
|------------|----------|----------|-----------|------------------|-----------------------|-----------------------------------|
| cg17964844 | 0.678    | 0.409    | 0.268     | 0.024            | NA                    | Hypermethylated in P3F versus P7F |
| cg06285590 | 0.517    | 0.229    | 0.288     | 0.024            | NA                    | Hypermethylated in P3F versus P7F |
| cg05398903 | 0.507    | 0.232    | 0.275     | 0.024            | NA                    | Hypermethylated in P3F versus P7F |
| cg24670552 | 0.594    | 0.329    | 0.265     | 0.024            | IRS2                  | Hypermethylated in P3F versus P7F |
| cg19306063 | 0.539    | 0.254    | 0.285     | 0.024            | C10orf125             | Hypermethylated in P3F versus P7F |
| cg15951188 | 0.661    | 0.351    | 0.311     | 0.024            | KCNAB3                | Hypermethylated in P3F versus P7F |
| cg14834267 | 0.583    | 0.269    | 0.314     | 0.024            | NAV1                  | Hypermethylated in P3F versus P7F |
| cg21838979 | 0.628    | 0.350    | 0.279     | 0.024            | C2orf40               | Hypermethylated in P3F versus P7F |
| cg17966560 | 0.527    | 0.275    | 0.251     | 0.024            | NA                    | Hypermethylated in P3F versus P7F |
| cg09847153 | 0.456    | 0.183    | 0.273     | 0.024            | NA                    | Hypermethylated in P3F versus P7F |
| cg13377102 | 0.683    | 0.343    | 0.341     | 0.024            | KCNAB3                | Hypermethylated in P3F versus P7F |
| cg13003054 | 0.363    | 0.110    | 0.254     | 0.024            | PATZ1                 | Hypermethylated in P3F versus P7F |
| cg06528559 | 0.626    | 0.309    | 0.317     | 0.025            | LOC100132215          | Hypermethylated in P3F versus P7F |
| cg23238119 | 0.531    | 0.265    | 0.266     | 0.025            | NA                    | Hypermethylated in P3F versus P7F |
| cg27651243 | 0.596    | 0.329    | 0.267     | 0.025            | NA                    | Hypermethylated in P3F versus P7F |
| cg25622366 | 0.690    | 0.439    | 0.251     | 0.025            | NA                    | Hypermethylated in P3F versus P7F |
| cg22451358 | 0.608    | 0.293    | 0.315     | 0.025            | NA                    | Hypermethylated in P3F versus P7F |
| cg16374663 | 0.548    | 0.287    | 0.261     | 0.025            | NA                    | Hypermethylated in P3F versus P7F |
| cg23404330 | 0.625    | 0.358    | 0.267     | 0.025            | NA                    | Hypermethylated in P3F versus P7F |
| cg10638734 | 0.673    | 0.420    | 0.253     | 0.025            | GPRC5B                | Hypermethylated in P3F versus P7F |
| cg06234511 | 0.699    | 0.444    | 0.255     | 0.025            | NA                    | Hypermethylated in P3F versus P7F |
| cg01539849 | 0.538    | 0.269    | 0.269     | 0.025            | NA                    | Hypermethylated in P3F versus P7F |
| cg21752601 | 0.495    | 0.230    | 0.265     | 0.025            | UCN                   | Hypermethylated in P3F versus P7F |
| cg23154059 | 0.545    | 0.291    | 0.254     | 0.025            | NA                    | Hypermethylated in P3F versus P7F |
| cg05060949 | 0.478    | 0.196    | 0.282     | 0.025            | NA                    | Hypermethylated in P3F versus P7F |

### Supplementary Table 3 (continued)

| Probe      | P3F.mean | P7F.mean | Mean.diff | Adjusted.P.value | Promoter.related.gene | Category                          |
|------------|----------|----------|-----------|------------------|-----------------------|-----------------------------------|
| cg04843461 | 0.598    | 0.326    | 0.272     | 0.025            | NA                    | Hypermethylated in P3F versus P7F |
| cg13574390 | 0.444    | 0.178    | 0.265     | 0.025            | NA                    | Hypermethylated in P3F versus P7F |
| cg24813176 | 0.617    | 0.334    | 0.283     | 0.025            | NA                    | Hypermethylated in P3F versus P7F |
| cg17536603 | 0.488    | 0.192    | 0.297     | 0.025            | NA                    | Hypermethylated in P3F versus P7F |
| cg26385172 | 0.552    | 0.296    | 0.256     | 0.025            | NA                    | Hypermethylated in P3F versus P7F |
| cg18586886 | 0.557    | 0.293    | 0.264     | 0.025            | KIAA1949              | Hypermethylated in P3F versus P7F |
| cg03674127 | 0.589    | 0.303    | 0.286     | 0.025            | DYSF                  | Hypermethylated in P3F versus P7F |
| cg25397922 | 0.487    | 0.197    | 0.290     | 0.025            | NA                    | Hypermethylated in P3F versus P7F |
| cg03953626 | 0.504    | 0.243    | 0.260     | 0.025            | KIAA1949              | Hypermethylated in P3F versus P7F |
| cg01618781 | 0.466    | 0.171    | 0.295     | 0.025            | RIPK4                 | Hypermethylated in P3F versus P7F |
| cg22976224 | 0.524    | 0.250    | 0.274     | 0.025            | SIM2                  | Hypermethylated in P3F versus P7F |
| cg11317199 | 0.522    | 0.253    | 0.269     | 0.025            | NA                    | Hypermethylated in P3F versus P7F |
| cg03947814 | 0.568    | 0.282    | 0.285     | 0.025            | KCNQ1DN               | Hypermethylated in P3F versus P7F |
| cg20609883 | 0.607    | 0.352    | 0.254     | 0.025            | NA                    | Hypermethylated in P3F versus P7F |
| cg02508881 | 0.534    | 0.219    | 0.315     | 0.025            | NA                    | Hypermethylated in P3F versus P7F |
| cg17739038 | 0.378    | 0.092    | 0.286     | 0.025            | HIC1                  | Hypermethylated in P3F versus P7F |
| cg25449542 | 0.319    | 0.059    | 0.260     | 0.026            | HIC1                  | Hypermethylated in P3F versus P7F |
| cg09060608 | 0.550    | 0.276    | 0.274     | 0.026            | RUFY1                 | Hypermethylated in P3F versus P7F |
| cg12713060 | 0.573    | 0.319    | 0.255     | 0.026            | NA                    | Hypermethylated in P3F versus P7F |
| cg08394412 | 0.419    | 0.162    | 0.256     | 0.026            | NA                    | Hypermethylated in P3F versus P7F |
| cg07173547 | 0.558    | 0.287    | 0.271     | 0.026            | NA                    | Hypermethylated in P3F versus P7F |
| cg20844851 | 0.705    | 0.421    | 0.284     | 0.026            | NA                    | Hypermethylated in P3F versus P7F |
| cg16057915 | 0.655    | 0.376    | 0.279     | 0.026            | NA                    | Hypermethylated in P3F versus P7F |
| cg13763550 | 0.545    | 0.281    | 0.264     | 0.026            | HMOX2                 | Hypermethylated in P3F versus P7F |
| cg14040634 | 0.617    | 0.361    | 0.256     | 0.026            | NA                    | Hypermethylated in P3F versus P7F |

### Supplementary Table 3 (continued)

| Probe      | P3F.mean | P7F.mean | Mean.diff | Adjusted.P.value | Promoter.related.gene | Category                          |
|------------|----------|----------|-----------|------------------|-----------------------|-----------------------------------|
| cg12096447 | 0.492    | 0.234    | 0.258     | 0.026            | BRF1_BTBD6            | Hypermethylated in P3F versus P7F |
| cg21046148 | 0.538    | 0.281    | 0.257     | 0.027            | NA                    | Hypermethylated in P3F versus P7F |
| cg04654530 | 0.666    | 0.395    | 0.270     | 0.027            | NA                    | Hypermethylated in P3F versus P7F |
| cg06499647 | 0.496    | 0.229    | 0.267     | 0.027            | C2orf40               | Hypermethylated in P3F versus P7F |
| cg14110885 | 0.702    | 0.448    | 0.254     | 0.027            | WFIKKN2               | Hypermethylated in P3F versus P7F |
| cg07974511 | 0.701    | 0.391    | 0.310     | 0.027            | NA                    | Hypermethylated in P3F versus P7F |
| cg12314682 | 0.602    | 0.340    | 0.262     | 0.027            | NA                    | Hypermethylated in P3F versus P7F |
| cg25241559 | 0.695    | 0.436    | 0.259     | 0.027            | NA                    | Hypermethylated in P3F versus P7F |
| cg19126169 | 0.712    | 0.454    | 0.258     | 0.027            | NA                    | Hypermethylated in P3F versus P7F |
| cg21226059 | 0.544    | 0.242    | 0.301     | 0.027            | RUFY1                 | Hypermethylated in P3F versus P7F |
| cg14820908 | 0.551    | 0.261    | 0.290     | 0.027            | RUFY1                 | Hypermethylated in P3F versus P7F |
| cg18163092 | 0.661    | 0.396    | 0.265     | 0.027            | NA                    | Hypermethylated in P3F versus P7F |
| cg17276853 | 0.585    | 0.299    | 0.286     | 0.027            | NA                    | Hypermethylated in P3F versus P7F |
| cg16601494 | 0.593    | 0.251    | 0.342     | 0.027            | C1orf70               | Hypermethylated in P3F versus P7F |
| cg09045262 | 0.589    | 0.338    | 0.251     | 0.028            | AKR7L                 | Hypermethylated in P3F versus P7F |
| cg01614102 | 0.574    | 0.313    | 0.261     | 0.028            | NA                    | Hypermethylated in P3F versus P7F |
| cg00661970 | 0.515    | 0.250    | 0.265     | 0.028            | NA                    | Hypermethylated in P3F versus P7F |
| cg02728483 | 0.539    | 0.234    | 0.306     | 0.028            | NA                    | Hypermethylated in P3F versus P7F |
| cg08961664 | 0.758    | 0.480    | 0.278     | 0.028            | NA                    | Hypermethylated in P3F versus P7F |
| cg06234051 | 0.745    | 0.487    | 0.258     | 0.028            | NA                    | Hypermethylated in P3F versus P7F |
| cg09940032 | 0.612    | 0.296    | 0.316     | 0.028            | NA                    | Hypermethylated in P3F versus P7F |
| cg13588023 | 0.452    | 0.199    | 0.253     | 0.028            | RIPK4                 | Hypermethylated in P3F versus P7F |
| cg13071729 | 0.566    | 0.290    | 0.276     | 0.028            | NAV1                  | Hypermethylated in P3F versus P7F |
| cg15533809 | 0.831    | 0.534    | 0.297     | 0.029            | NA                    | Hypermethylated in P3F versus P7F |
| cg18392016 | 0.692    | 0.396    | 0.296     | 0.029            | NA                    | Hypermethylated in P3F versus P7F |

### Supplementary Table 3 (continued)

| Probe      | P3F.mean | P7F.mean | Mean.diff | Adjusted.P.value | Promoter.related.gene | Category                          |
|------------|----------|----------|-----------|------------------|-----------------------|-----------------------------------|
| cg12158737 | 0.722    | 0.461    | 0.261     | 0.029            | NA                    | Hypermethylated in P3F versus P7F |
| cg06192497 | 0.496    | 0.230    | 0.266     | 0.029            | LOC100132215          | Hypermethylated in P3F versus P7F |
| cg15487867 | 0.521    | 0.183    | 0.338     | 0.029            | C1orf70               | Hypermethylated in P3F versus P7F |
| cg04423188 | 0.693    | 0.405    | 0.288     | 0.029            | NA                    | Hypermethylated in P3F versus P7F |
| cg04962428 | 0.373    | 0.120    | 0.253     | 0.029            | HIC1                  | Hypermethylated in P3F versus P7F |
| cg15178202 | 0.631    | 0.353    | 0.278     | 0.029            | NA                    | Hypermethylated in P3F versus P7F |
| cg05865451 | 0.647    | 0.369    | 0.278     | 0.029            | NA                    | Hypermethylated in P3F versus P7F |
| cg27072012 | 0.476    | 0.190    | 0.286     | 0.029            | NA                    | Hypermethylated in P3F versus P7F |
| cg17147526 | 0.640    | 0.361    | 0.279     | 0.029            | NA                    | Hypermethylated in P3F versus P7F |
| cg00110609 | 0.739    | 0.463    | 0.276     | 0.029            | NA                    | Hypermethylated in P3F versus P7F |
| cg17128947 | 0.659    | 0.365    | 0.294     | 0.030            | NA                    | Hypermethylated in P3F versus P7F |
| cg20898829 | 0.399    | 0.115    | 0.284     | 0.030            | NA                    | Hypermethylated in P3F versus P7F |
| cg18610958 | 0.668    | 0.372    | 0.296     | 0.030            | DYSF                  | Hypermethylated in P3F versus P7F |
| cg22497741 | 0.424    | 0.167    | 0.257     | 0.030            | NA                    | Hypermethylated in P3F versus P7F |
| cg13990926 | 0.503    | 0.211    | 0.292     | 0.030            | NA                    | Hypermethylated in P3F versus P7F |
| cg16999254 | 0.710    | 0.449    | 0.261     | 0.030            | NA                    | Hypermethylated in P3F versus P7F |
| cg23548627 | 0.587    | 0.331    | 0.256     | 0.030            | NA                    | Hypermethylated in P3F versus P7F |
| cg00420348 | 0.514    | 0.237    | 0.277     | 0.030            | NA                    | Hypermethylated in P3F versus P7F |
| cg02259324 | 0.455    | 0.198    | 0.257     | 0.031            | NA                    | Hypermethylated in P3F versus P7F |
| cg13058710 | 0.609    | 0.309    | 0.300     | 0.031            | NA                    | Hypermethylated in P3F versus P7F |
| cg14409023 | 0.490    | 0.214    | 0.276     | 0.031            | NA                    | Hypermethylated in P3F versus P7F |
| cg00361495 | 0.582    | 0.260    | 0.321     | 0.031            | TRIL                  | Hypermethylated in P3F versus P7F |
| cg19172487 | 0.586    | 0.336    | 0.250     | 0.031            | PARVB                 | Hypermethylated in P3F versus P7F |
| cg08416315 | 0.672    | 0.403    | 0.269     | 0.031            | NA                    | Hypermethylated in P3F versus P7F |
| cg04410777 | 0.563    | 0.302    | 0.261     | 0.031            | SEMA6B                | Hypermethylated in P3F versus P7F |

### Supplementary Table 3 (continued)

| Probe      | P3F.mean | P7F.mean | Mean.diff | Adjusted.P.value | Promoter.related.gene | Category                          |
|------------|----------|----------|-----------|------------------|-----------------------|-----------------------------------|
| cg14905632 | 0.568    | 0.313    | 0.254     | 0.031            | RAPGEFL1              | Hypermethylated in P3F versus P7F |
| cg00813378 | 0.569    | 0.259    | 0.310     | 0.031            | NA                    | Hypermethylated in P3F versus P7F |
| cg16100355 | 0.584    | 0.296    | 0.289     | 0.031            | NA                    | Hypermethylated in P3F versus P7F |
| cg10122865 | 0.707    | 0.420    | 0.286     | 0.031            | NA                    | Hypermethylated in P3F versus P7F |
| cg01488770 | 0.723    | 0.427    | 0.296     | 0.032            | NA                    | Hypermethylated in P3F versus P7F |
| cg10706389 | 0.492    | 0.230    | 0.262     | 0.032            | NA                    | Hypermethylated in P3F versus P7F |
| cg17495087 | 0.549    | 0.269    | 0.280     | 0.032            | NA                    | Hypermethylated in P3F versus P7F |
| cg05369142 | 0.593    | 0.321    | 0.272     | 0.032            | NA                    | Hypermethylated in P3F versus P7F |
| cg19697239 | 0.570    | 0.318    | 0.252     | 0.032            | NA                    | Hypermethylated in P3F versus P7F |
| cg16589807 | 0.639    | 0.367    | 0.272     | 0.032            | NA                    | Hypermethylated in P3F versus P7F |
| cg15556943 | 0.732    | 0.457    | 0.275     | 0.032            | NA                    | Hypermethylated in P3F versus P7F |
| cg10765471 | 0.736    | 0.483    | 0.252     | 0.032            | NA                    | Hypermethylated in P3F versus P7F |
| cg18262591 | 0.567    | 0.290    | 0.277     | 0.032            | NA                    | Hypermethylated in P3F versus P7F |
| cg19883813 | 0.554    | 0.263    | 0.291     | 0.032            | NA                    | Hypermethylated in P3F versus P7F |
| cg15843262 | 0.464    | 0.207    | 0.257     | 0.032            | NA                    | Hypermethylated in P3F versus P7F |
| cg15078681 | 0.509    | 0.204    | 0.306     | 0.032            | AMIGO3                | Hypermethylated in P3F versus P7F |
| cg27494647 | 0.452    | 0.199    | 0.253     | 0.032            | RARRES2               | Hypermethylated in P3F versus P7F |
| cg12506930 | 0.620    | 0.343    | 0.277     | 0.032            | ZNF154                | Hypermethylated in P3F versus P7F |
| cg17471467 | 0.605    | 0.313    | 0.292     | 0.032            | ALX4                  | Hypermethylated in P3F versus P7F |
| cg18095675 | 0.608    | 0.338    | 0.270     | 0.032            | NA                    | Hypermethylated in P3F versus P7F |
| cg02156870 | 0.502    | 0.245    | 0.257     | 0.032            | NA                    | Hypermethylated in P3F versus P7F |
| cg16850254 | 0.467    | 0.190    | 0.277     | 0.032            | NA                    | Hypermethylated in P3F versus P7F |
| cg27639620 | 0.405    | 0.141    | 0.264     | 0.033            | NA                    | Hypermethylated in P3F versus P7F |
| cg14223293 | 0.674    | 0.397    | 0.277     | 0.033            | NA                    | Hypermethylated in P3F versus P7F |
| cg25287257 | 0.477    | 0.183    | 0.294     | 0.033            | NA                    | Hypermethylated in P3F versus P7F |

### Supplementary Table 3 (continued)

| Probe      | P3F.mean | P7F.mean | Mean.diff | Adjusted.P.value | Promoter.related.gene | Category                          |
|------------|----------|----------|-----------|------------------|-----------------------|-----------------------------------|
| cg05099145 | 0.775    | 0.520    | 0.254     | 0.033            | NA                    | Hypermethylated in P3F versus P7F |
| cg08887400 | 0.515    | 0.259    | 0.256     | 0.033            | KIAA1949              | Hypermethylated in P3F versus P7F |
| cg18620571 | 0.514    | 0.247    | 0.267     | 0.033            | NA                    | Hypermethylated in P3F versus P7F |
| cg12702981 | 0.599    | 0.347    | 0.251     | 0.033            | NA                    | Hypermethylated in P3F versus P7F |
| cg04141770 | 0.636    | 0.385    | 0.251     | 0.033            | NA                    | Hypermethylated in P3F versus P7F |
| cg05661282 | 0.448    | 0.171    | 0.277     | 0.033            | ZNF154                | Hypermethylated in P3F versus P7F |
| cg05563515 | 0.512    | 0.194    | 0.318     | 0.033            | NA                    | Hypermethylated in P3F versus P7F |
| cg16517702 | 0.582    | 0.291    | 0.291     | 0.033            | NAV1                  | Hypermethylated in P3F versus P7F |
| cg10501093 | 0.514    | 0.246    | 0.268     | 0.033            | NA                    | Hypermethylated in P3F versus P7F |
| cg15826437 | 0.702    | 0.439    | 0.263     | 0.034            | RAPGEFL1              | Hypermethylated in P3F versus P7F |
| cg16557178 | 0.512    | 0.241    | 0.271     | 0.034            | NA                    | Hypermethylated in P3F versus P7F |
| cg21635854 | 0.391    | 0.112    | 0.279     | 0.034            | NA                    | Hypermethylated in P3F versus P7F |
| cg17763354 | 0.654    | 0.403    | 0.251     | 0.034            | NA                    | Hypermethylated in P3F versus P7F |
| cg27049766 | 0.537    | 0.235    | 0.301     | 0.034            | ZNF154                | Hypermethylated in P3F versus P7F |
| cg06488957 | 0.475    | 0.187    | 0.288     | 0.034            | NA                    | Hypermethylated in P3F versus P7F |
| cg01693350 | 0.557    | 0.303    | 0.253     | 0.034            | NA                    | Hypermethylated in P3F versus P7F |
| cg21790626 | 0.429    | 0.162    | 0.268     | 0.034            | ZNF154                | Hypermethylated in P3F versus P7F |
| cg15864834 | 0.521    | 0.246    | 0.276     | 0.034            | NA                    | Hypermethylated in P3F versus P7F |
| cg19020830 | 0.494    | 0.230    | 0.264     | 0.035            | ALX4                  | Hypermethylated in P3F versus P7F |
| cg19409060 | 0.391    | 0.141    | 0.250     | 0.035            | NA                    | Hypermethylated in P3F versus P7F |
| cg08084154 | 0.627    | 0.367    | 0.261     | 0.035            | TESSP1                | Hypermethylated in P3F versus P7F |
| cg06698795 | 0.538    | 0.272    | 0.265     | 0.035            | NA                    | Hypermethylated in P3F versus P7F |
| cg04304333 | 0.629    | 0.346    | 0.283     | 0.035            | NA                    | Hypermethylated in P3F versus P7F |
| cg00242627 | 0.491    | 0.233    | 0.259     | 0.035            | NA                    | Hypermethylated in P3F versus P7F |
| cg07023704 | 0.592    | 0.307    | 0.285     | 0.035            | NA                    | Hypermethylated in P3F versus P7F |



### Supplementary Table 3 (continued)

| Probe      | P3F.mean | P7F.mean | Mean.diff | Adjusted.P.value | Promoter.related.gene | Category                          |
|------------|----------|----------|-----------|------------------|-----------------------|-----------------------------------|
| cg06637517 | 0.624    | 0.322    | 0.302     | 0.035            | NA                    | Hypermethylated in P3F versus P7F |
| cg12432236 | 0.534    | 0.269    | 0.266     | 0.035            | PCDH17                | Hypermethylated in P3F versus P7F |
| cg05200037 | 0.556    | 0.305    | 0.251     | 0.035            | NA                    | Hypermethylated in P3F versus P7F |
| cg15071854 | 0.428    | 0.150    | 0.278     | 0.035            | HPDL                  | Hypermethylated in P3F versus P7F |
| cg04237822 | 0.644    | 0.380    | 0.264     | 0.035            | NA                    | Hypermethylated in P3F versus P7F |
| cg08607018 | 0.425    | 0.120    | 0.305     | 0.036            | NA                    | Hypermethylated in P3F versus P7F |
| cg13834146 | 0.468    | 0.210    | 0.258     | 0.036            | NA                    | Hypermethylated in P3F versus P7F |
| cg22234712 | 0.592    | 0.310    | 0.282     | 0.036            | NA                    | Hypermethylated in P3F versus P7F |
| cg10754215 | 0.539    | 0.261    | 0.278     | 0.036            | NA                    | Hypermethylated in P3F versus P7F |
| cg07575466 | 0.755    | 0.475    | 0.280     | 0.036            | NA                    | Hypermethylated in P3F versus P7F |
| cg23288335 | 0.444    | 0.181    | 0.263     | 0.036            | NA                    | Hypermethylated in P3F versus P7F |
| cg25090972 | 0.456    | 0.192    | 0.264     | 0.036            | NA                    | Hypermethylated in P3F versus P7F |
| cg02918054 | 0.479    | 0.227    | 0.252     | 0.036            | NA                    | Hypermethylated in P3F versus P7F |
| cg03423149 | 0.578    | 0.277    | 0.301     | 0.036            | NA                    | Hypermethylated in P3F versus P7F |
| cg19615174 | 0.613    | 0.333    | 0.280     | 0.036            | SEMA6B                | Hypermethylated in P3F versus P7F |
| cg27286993 | 0.461    | 0.177    | 0.284     | 0.037            | NA                    | Hypermethylated in P3F versus P7F |
| cg14222656 | 0.573    | 0.309    | 0.263     | 0.037            | NA                    | Hypermethylated in P3F versus P7F |
| cg05834805 | 0.491    | 0.234    | 0.257     | 0.037            | NA                    | Hypermethylated in P3F versus P7F |
| cg16306898 | 0.479    | 0.164    | 0.315     | 0.037            | C1orf70               | Hypermethylated in P3F versus P7F |
| cg24311947 | 0.476    | 0.222    | 0.254     | 0.037            | XKR8                  | Hypermethylated in P3F versus P7F |
| cg26268145 | 0.713    | 0.443    | 0.270     | 0.037            | NA                    | Hypermethylated in P3F versus P7F |
| cg19788250 | 0.566    | 0.291    | 0.275     | 0.037            | NA                    | Hypermethylated in P3F versus P7F |
| cg04586407 | 0.614    | 0.281    | 0.332     | 0.037            | NA                    | Hypermethylated in P3F versus P7F |
| cg13639451 | 0.735    | 0.470    | 0.265     | 0.037            | WFIKKN2               | Hypermethylated in P3F versus P7F |
| cg00784671 | 0.630    | 0.371    | 0.259     | 0.037            | NA                    | Hypermethylated in P3F versus P7F |

### Supplementary Table 3 (continued)

| Probe      | P3F.mean | P7F.mean | Mean.diff | Adjusted.P.value | Promoter.related.gene | Category                          |
|------------|----------|----------|-----------|------------------|-----------------------|-----------------------------------|
| cg26117265 | 0.524    | 0.253    | 0.271     | 0.038            | NA                    | Hypermethylated in P3F versus P7F |
| cg05361489 | 0.597    | 0.342    | 0.254     | 0.038            | NA                    | Hypermethylated in P3F versus P7F |
| cg13176012 | 0.635    | 0.382    | 0.254     | 0.038            | NA                    | Hypermethylated in P3F versus P7F |
| cg18403792 | 0.571    | 0.318    | 0.253     | 0.038            | NA                    | Hypermethylated in P3F versus P7F |
| cg10568066 | 0.536    | 0.215    | 0.321     | 0.038            | NA                    | Hypermethylated in P3F versus P7F |
| cg09588555 | 0.506    | 0.247    | 0.259     | 0.038            | NA                    | Hypermethylated in P3F versus P7F |
| cg16012719 | 0.550    | 0.275    | 0.274     | 0.039            | NA                    | Hypermethylated in P3F versus P7F |
| cg12633154 | 0.495    | 0.206    | 0.289     | 0.039            | NA                    | Hypermethylated in P3F versus P7F |
| cg14496909 | 0.760    | 0.509    | 0.251     | 0.039            | NA                    | Hypermethylated in P3F versus P7F |
| cg10964421 | 0.462    | 0.211    | 0.251     | 0.039            | NA                    | Hypermethylated in P3F versus P7F |
| cg14544666 | 0.546    | 0.254    | 0.292     | 0.039            | NA                    | Hypermethylated in P3F versus P7F |
| cg14947929 | 0.551    | 0.299    | 0.252     | 0.039            | RIPK4                 | Hypermethylated in P3F versus P7F |
| cg27637521 | 0.566    | 0.292    | 0.274     | 0.040            | NA                    | Hypermethylated in P3F versus P7F |
| cg25168494 | 0.506    | 0.225    | 0.280     | 0.040            | NA                    | Hypermethylated in P3F versus P7F |
| cg02381965 | 0.706    | 0.433    | 0.273     | 0.040            | NA                    | Hypermethylated in P3F versus P7F |
| cg03940848 | 0.501    | 0.220    | 0.281     | 0.040            | NA                    | Hypermethylated in P3F versus P7F |
| cg24637044 | 0.546    | 0.223    | 0.323     | 0.040            | NA                    | Hypermethylated in P3F versus P7F |
| cg07949011 | 0.580    | 0.310    | 0.271     | 0.040            | NA                    | Hypermethylated in P3F versus P7F |
| cg27114640 | 0.546    | 0.246    | 0.300     | 0.041            | NA                    | Hypermethylated in P3F versus P7F |
| cg07916589 | 0.485    | 0.227    | 0.258     | 0.041            | NA                    | Hypermethylated in P3F versus P7F |
| cg01286685 | 0.439    | 0.179    | 0.260     | 0.041            | NA                    | Hypermethylated in P3F versus P7F |
| cg22697962 | 0.667    | 0.414    | 0.254     | 0.042            | NA                    | Hypermethylated in P3F versus P7F |
| cg04178858 | 0.678    | 0.403    | 0.274     | 0.042            | RAPGEFL1              | Hypermethylated in P3F versus P7F |
| cg14100362 | 0.571    | 0.308    | 0.263     | 0.042            | NA                    | Hypermethylated in P3F versus P7F |
| cg21472506 | 0.671    | 0.396    | 0.275     | 0.042            | NA                    | Hypermethylated in P3F versus P7F |

### Supplementary Table 3 (continued)

| Probe      | P3F.mean | P7F.mean | Mean.diff | Adjusted.P.value | Promoter.related.gene | Category                          |
|------------|----------|----------|-----------|------------------|-----------------------|-----------------------------------|
| cg24361265 | 0.713    | 0.442    | 0.271     | 0.042            | NA                    | Hypermethylated in P3F versus P7F |
| cg24957695 | 0.465    | 0.207    | 0.259     | 0.042            | NA                    | Hypermethylated in P3F versus P7F |
| cg25551714 | 0.530    | 0.258    | 0.272     | 0.043            | NA                    | Hypermethylated in P3F versus P7F |
| cg13401893 | 0.486    | 0.193    | 0.294     | 0.043            | NA                    | Hypermethylated in P3F versus P7F |
| cg25363807 | 0.655    | 0.390    | 0.265     | 0.043            | NA                    | Hypermethylated in P3F versus P7F |
| cg12186839 | 0.537    | 0.274    | 0.263     | 0.044            | NA                    | Hypermethylated in P3F versus P7F |
| cg09577841 | 0.389    | 0.124    | 0.265     | 0.044            | NA                    | Hypermethylated in P3F versus P7F |
| cg16602747 | 0.543    | 0.281    | 0.262     | 0.044            | NA                    | Hypermethylated in P3F versus P7F |
| cg23625084 | 0.734    | 0.461    | 0.273     | 0.044            | NA                    | Hypermethylated in P3F versus P7F |
| cg19082560 | 0.671    | 0.408    | 0.263     | 0.044            | NA                    | Hypermethylated in P3F versus P7F |
| cg00779056 | 0.638    | 0.367    | 0.271     | 0.044            | NA                    | Hypermethylated in P3F versus P7F |
| cg05706898 | 0.651    | 0.400    | 0.252     | 0.044            | NA                    | Hypermethylated in P3F versus P7F |
| cg06274857 | 0.615    | 0.355    | 0.259     | 0.045            | NA                    | Hypermethylated in P3F versus P7F |
| cg00498591 | 0.608    | 0.340    | 0.268     | 0.045            | NA                    | Hypermethylated in P3F versus P7F |
| cg05561386 | 0.580    | 0.321    | 0.259     | 0.045            | NA                    | Hypermethylated in P3F versus P7F |
| cg04046669 | 0.552    | 0.286    | 0.266     | 0.045            | HORMAD2               | Hypermethylated in P3F versus P7F |
| cg11294513 | 0.536    | 0.275    | 0.262     | 0.045            | NA                    | Hypermethylated in P3F versus P7F |
| cg00080972 | 0.548    | 0.273    | 0.275     | 0.045            | RUFY1                 | Hypermethylated in P3F versus P7F |
| cg23693289 | 0.664    | 0.402    | 0.263     | 0.045            | PTK2B                 | Hypermethylated in P3F versus P7F |
| cg00374839 | 0.665    | 0.389    | 0.275     | 0.046            | ALX4                  | Hypermethylated in P3F versus P7F |
| cg19343611 | 0.634    | 0.351    | 0.283     | 0.046            | NA                    | Hypermethylated in P3F versus P7F |
| cg12178578 | 0.453    | 0.179    | 0.274     | 0.046            | HPDL                  | Hypermethylated in P3F versus P7F |
| cg08373573 | 0.658    | 0.370    | 0.288     | 0.046            | NA                    | Hypermethylated in P3F versus P7F |
| cg03748603 | 0.572    | 0.292    | 0.280     | 0.046            | NA                    | Hypermethylated in P3F versus P7F |
| cg13772376 | 0.599    | 0.348    | 0.251     | 0.047            | NA                    | Hypermethylated in P3F versus P7F |

### Supplementary Table 3 (continued)

| Probe      | P3F.mean | P7F.mean | Mean.diff | Adjusted.P.value | Promoter.related.gene | Category                          |
|------------|----------|----------|-----------|------------------|-----------------------|-----------------------------------|
| cg11631523 | 0.473    | 0.211    | 0.262     | 0.047            | NA                    | Hypermethylated in P3F versus P7F |
| cg17759252 | 0.564    | 0.297    | 0.268     | 0.047            | NA                    | Hypermethylated in P3F versus P7F |
| cg08466792 | 0.653    | 0.349    | 0.303     | 0.048            | NA                    | Hypermethylated in P3F versus P7F |
| cg13246235 | 0.493    | 0.241    | 0.252     | 0.048            | NA                    | Hypermethylated in P3F versus P7F |
| cg10409799 | 0.557    | 0.251    | 0.306     | 0.048            | ADAR                  | Hypermethylated in P3F versus P7F |
| cg20399509 | 0.598    | 0.324    | 0.274     | 0.048            | NA                    | Hypermethylated in P3F versus P7F |
| cg04814450 | 0.589    | 0.337    | 0.252     | 0.048            | NA                    | Hypermethylated in P3F versus P7F |
| cg24169669 | 0.632    | 0.336    | 0.296     | 0.048            | NA                    | Hypermethylated in P3F versus P7F |
| cg27318318 | 0.602    | 0.338    | 0.264     | 0.049            | ALX4                  | Hypermethylated in P3F versus P7F |
| cg11536474 | 0.622    | 0.300    | 0.321     | 0.049            | NA                    | Hypermethylated in P3F versus P7F |
| cg21512447 | 0.520    | 0.258    | 0.262     | 0.049            | NA                    | Hypermethylated in P3F versus P7F |
| cg12534424 | 0.587    | 0.334    | 0.253     | 0.049            | NA                    | Hypermethylated in P3F versus P7F |
| cg08738570 | 0.613    | 0.355    | 0.258     | 0.050            | NA                    | Hypermethylated in P3F versus P7F |
| cg22157239 | 0.144    | 0.602    | -0.458    | 0.000            | NA                    | Hypomethylated in P3F versus P7F  |
| cg08171206 | 0.234    | 0.720    | -0.487    | 0.000            | NA                    | Hypomethylated in P3F versus P7F  |
| cg08129914 | 0.254    | 0.609    | -0.355    | 0.000            | NA                    | Hypomethylated in P3F versus P7F  |
| cg26907082 | 0.312    | 0.584    | -0.272    | 0.000            | NA                    | Hypomethylated in P3F versus P7F  |
| cg05375686 | 0.331    | 0.678    | -0.347    | 0.000            | NA                    | Hypomethylated in P3F versus P7F  |
| cg06013833 | 0.393    | 0.765    | -0.372    | 0.000            | NA                    | Hypomethylated in P3F versus P7F  |
| cg18328265 | 0.543    | 0.861    | -0.318    | 0.000            | NA                    | Hypomethylated in P3F versus P7F  |
| cg10634728 | 0.503    | 0.862    | -0.360    | 0.001            | NA                    | Hypomethylated in P3F versus P7F  |
| cg15361661 | 0.207    | 0.509    | -0.302    | 0.001            | ARHGAP25              | Hypomethylated in P3F versus P7F  |
| cg11950383 | 0.225    | 0.571    | -0.346    | 0.001            | NA                    | Hypomethylated in P3F versus P7F  |
| cg08022524 | 0.373    | 0.658    | -0.285    | 0.001            | CCDC140               | Hypomethylated in P3F versus P7F  |
| cg23184638 | 0.537    | 0.865    | -0.328    | 0.001            | NA                    | Hypomethylated in P3F versus P7F  |

### Supplementary Table 3 (continued)

| Probe      | P3F.mean | P7F.mean | Mean.diff | Adjusted.P.value | Promoter.related.gene | Category                         |
|------------|----------|----------|-----------|------------------|-----------------------|----------------------------------|
| cg11333576 | 0.494    | 0.811    | -0.316    | 0.001            | NA                    | Hypomethylated in P3F versus P7F |
| cg01407235 | 0.240    | 0.607    | -0.367    | 0.001            | ARHGAP25              | Hypomethylated in P3F versus P7F |
| cg14120583 | 0.420    | 0.671    | -0.251    | 0.001            | NA                    | Hypomethylated in P3F versus P7F |
| cg02858594 | 0.257    | 0.604    | -0.347    | 0.001            | NA                    | Hypomethylated in P3F versus P7F |
| cg26378982 | 0.417    | 0.734    | -0.317    | 0.001            | KCNF1                 | Hypomethylated in P3F versus P7F |
| cg25254825 | 0.251    | 0.594    | -0.343    | 0.001            | NA                    | Hypomethylated in P3F versus P7F |
| cg23546474 | 0.104    | 0.429    | -0.325    | 0.002            | CCDC140               | Hypomethylated in P3F versus P7F |
| cg07926895 | 0.249    | 0.544    | -0.294    | 0.002            | NA                    | Hypomethylated in P3F versus P7F |
| cg27278086 | 0.234    | 0.543    | -0.309    | 0.002            | ARHGAP25              | Hypomethylated in P3F versus P7F |
| cg26238936 | 0.256    | 0.570    | -0.313    | 0.002            | ARHGAP25              | Hypomethylated in P3F versus P7F |
| cg17665497 | 0.389    | 0.677    | -0.288    | 0.002            | NA                    | Hypomethylated in P3F versus P7F |
| cg14555736 | 0.582    | 0.835    | -0.254    | 0.002            | NA                    | Hypomethylated in P3F versus P7F |
| cg08650910 | 0.158    | 0.454    | -0.296    | 0.002            | NA                    | Hypomethylated in P3F versus P7F |
| cg02013918 | 0.496    | 0.778    | -0.282    | 0.003            | NA                    | Hypomethylated in P3F versus P7F |
| cg08991742 | 0.229    | 0.544    | -0.315    | 0.003            | ARHGAP25              | Hypomethylated in P3F versus P7F |
| cg12049688 | 0.177    | 0.461    | -0.284    | 0.003            | NA                    | Hypomethylated in P3F versus P7F |
| cg24072451 | 0.523    | 0.783    | -0.260    | 0.003            | NA                    | Hypomethylated in P3F versus P7F |
| cg12093662 | 0.216    | 0.493    | -0.278    | 0.003            | ARHGAP25              | Hypomethylated in P3F versus P7F |
| cg25661973 | 0.358    | 0.720    | -0.363    | 0.003            | NA                    | Hypomethylated in P3F versus P7F |
| cg01790894 | 0.315    | 0.589    | -0.274    | 0.003            | CCDC140               | Hypomethylated in P3F versus P7F |
| cg06515159 | 0.229    | 0.553    | -0.324    | 0.003            | NA                    | Hypomethylated in P3F versus P7F |
| cg02536065 | 0.285    | 0.557    | -0.271    | 0.003            | NA                    | Hypomethylated in P3F versus P7F |
| cg24662698 | 0.339    | 0.658    | -0.318    | 0.004            | NA                    | Hypomethylated in P3F versus P7F |
| cg23347429 | 0.281    | 0.655    | -0.374    | 0.004            | NA                    | Hypomethylated in P3F versus P7F |
| cg09067976 | 0.233    | 0.528    | -0.296    | 0.004            | NA                    | Hypomethylated in P3F versus P7F |

### Supplementary Table 3 (continued)

| Probe      | P3F.mean | P7F.mean | Mean.diff | Adjusted.P.value | Promoter.related.gene | Category                         |
|------------|----------|----------|-----------|------------------|-----------------------|----------------------------------|
| cg25039325 | 0.322    | 0.615    | -0.293    | 0.004            | ARHGAP25              | Hypomethylated in P3F versus P7F |
| cg18595780 | 0.212    | 0.466    | -0.254    | 0.004            | NA                    | Hypomethylated in P3F versus P7F |
| cg18183163 | 0.272    | 0.617    | -0.346    | 0.004            | NA                    | Hypomethylated in P3F versus P7F |
| cg02856716 | 0.410    | 0.661    | -0.251    | 0.004            | NA                    | Hypomethylated in P3F versus P7F |
| cg14326413 | 0.334    | 0.719    | -0.385    | 0.005            | NA                    | Hypomethylated in P3F versus P7F |
| cg23411426 | 0.552    | 0.827    | -0.275    | 0.005            | NA                    | Hypomethylated in P3F versus P7F |
| cg05395210 | 0.338    | 0.635    | -0.297    | 0.005            | ARHGAP25              | Hypomethylated in P3F versus P7F |
| cg06613286 | 0.530    | 0.805    | -0.275    | 0.006            | NA                    | Hypomethylated in P3F versus P7F |
| cg05974274 | 0.321    | 0.688    | -0.367    | 0.006            | NA                    | Hypomethylated in P3F versus P7F |
| cg15685834 | 0.244    | 0.518    | -0.274    | 0.006            | NA                    | Hypomethylated in P3F versus P7F |
| cg15556886 | 0.334    | 0.681    | -0.348    | 0.006            | NA                    | Hypomethylated in P3F versus P7F |
| cg05181941 | 0.338    | 0.590    | -0.252    | 0.006            | NA                    | Hypomethylated in P3F versus P7F |
| cg08774452 | 0.326    | 0.695    | -0.368    | 0.006            | NA                    | Hypomethylated in P3F versus P7F |
| cg22054918 | 0.365    | 0.764    | -0.399    | 0.007            | NA                    | Hypomethylated in P3F versus P7F |
| cg17116178 | 0.465    | 0.716    | -0.251    | 0.007            | NA                    | Hypomethylated in P3F versus P7F |
| cg05373962 | 0.362    | 0.630    | -0.268    | 0.007            | NA                    | Hypomethylated in P3F versus P7F |
| cg01020413 | 0.367    | 0.694    | -0.327    | 0.008            | NA                    | Hypomethylated in P3F versus P7F |
| cg11265160 | 0.458    | 0.786    | -0.327    | 0.008            | NA                    | Hypomethylated in P3F versus P7F |
| cg20817902 | 0.292    | 0.623    | -0.331    | 0.008            | NA                    | Hypomethylated in P3F versus P7F |
| cg11601663 | 0.360    | 0.613    | -0.253    | 0.008            | NA                    | Hypomethylated in P3F versus P7F |
| cg10613332 | 0.458    | 0.753    | -0.295    | 0.008            | NA                    | Hypomethylated in P3F versus P7F |
| cg20744108 | 0.353    | 0.609    | -0.256    | 0.008            | NA                    | Hypomethylated in P3F versus P7F |
| cg10851251 | 0.367    | 0.650    | -0.282    | 0.008            | NA                    | Hypomethylated in P3F versus P7F |
| cg26353598 | 0.323    | 0.585    | -0.262    | 0.009            | NA                    | Hypomethylated in P3F versus P7F |
| cg00827382 | 0.553    | 0.809    | -0.256    | 0.009            | NA                    | Hypomethylated in P3F versus P7F |

### Supplementary Table 3 (continued)

| Probe      | P3F.mean | P7F.mean | Mean.diff | Adjusted.P.value | Promoter.related.gene | Category                         |
|------------|----------|----------|-----------|------------------|-----------------------|----------------------------------|
| cg06881421 | 0.372    | 0.638    | -0.266    | 0.009            | NA                    | Hypomethylated in P3F versus P7F |
| cg19989498 | 0.438    | 0.726    | -0.288    | 0.010            | NA                    | Hypomethylated in P3F versus P7F |
| cg02543772 | 0.336    | 0.676    | -0.339    | 0.010            | NA                    | Hypomethylated in P3F versus P7F |
| cg15062377 | 0.198    | 0.450    | -0.252    | 0.010            | NA                    | Hypomethylated in P3F versus P7F |
| cg00858840 | 0.201    | 0.474    | -0.273    | 0.011            | NA                    | Hypomethylated in P3F versus P7F |
| cg23992209 | 0.387    | 0.642    | -0.255    | 0.011            | CD5L                  | Hypomethylated in P3F versus P7F |
| cg07221967 | 0.332    | 0.600    | -0.269    | 0.012            | NA                    | Hypomethylated in P3F versus P7F |
| cg09839235 | 0.360    | 0.695    | -0.335    | 0.012            | NA                    | Hypomethylated in P3F versus P7F |
| cg14831950 | 0.460    | 0.713    | -0.253    | 0.013            | NA                    | Hypomethylated in P3F versus P7F |
| cg08217163 | 0.332    | 0.625    | -0.293    | 0.013            | NA                    | Hypomethylated in P3F versus P7F |
| cg07053114 | 0.398    | 0.666    | -0.268    | 0.013            | NA                    | Hypomethylated in P3F versus P7F |
| cg11241663 | 0.371    | 0.667    | -0.297    | 0.013            | NA                    | Hypomethylated in P3F versus P7F |
| cg16630482 | 0.163    | 0.425    | -0.262    | 0.014            | NA                    | Hypomethylated in P3F versus P7F |
| cg01721569 | 0.372    | 0.650    | -0.278    | 0.014            | NA                    | Hypomethylated in P3F versus P7F |
| cg02677035 | 0.476    | 0.728    | -0.252    | 0.015            | NA                    | Hypomethylated in P3F versus P7F |
| cg24007169 | 0.462    | 0.712    | -0.251    | 0.015            | NA                    | Hypomethylated in P3F versus P7F |
| cg10552446 | 0.352    | 0.616    | -0.265    | 0.015            | NA                    | Hypomethylated in P3F versus P7F |
| cg03104569 | 0.433    | 0.684    | -0.251    | 0.016            | NA                    | Hypomethylated in P3F versus P7F |
| cg23874561 | 0.334    | 0.610    | -0.276    | 0.017            | NA                    | Hypomethylated in P3F versus P7F |
| cg02666257 | 0.277    | 0.554    | -0.276    | 0.017            | NA                    | Hypomethylated in P3F versus P7F |
| cg01085569 | 0.344    | 0.608    | -0.263    | 0.017            | NA                    | Hypomethylated in P3F versus P7F |
| cg05941106 | 0.471    | 0.745    | -0.275    | 0.018            | NA                    | Hypomethylated in P3F versus P7F |
| cg22620090 | 0.243    | 0.520    | -0.278    | 0.019            | NA                    | Hypomethylated in P3F versus P7F |
| cg22549870 | 0.370    | 0.659    | -0.289    | 0.023            | NA                    | Hypomethylated in P3F versus P7F |
| cg01561916 | 0.317    | 0.585    | -0.268    | 0.024            | HAAO                  | Hypomethylated in P3F versus P7F |

### Supplementary Table 3 (continued)

| Probe      | P3F.mean | P7F.mean | Mean.diff | Adjusted.P.value | Promoter.related.gene | Category                         |
|------------|----------|----------|-----------|------------------|-----------------------|----------------------------------|
| cg21200539 | 0.383    | 0.660    | -0.277    | 0.025            | NA                    | Hypomethylated in P3F versus P7F |
| cg09480054 | 0.294    | 0.566    | -0.272    | 0.025            | HAAO                  | Hypomethylated in P3F versus P7F |
| cg01681098 | 0.336    | 0.612    | -0.276    | 0.026            | NA                    | Hypomethylated in P3F versus P7F |
| cg19279130 | 0.287    | 0.572    | -0.284    | 0.029            | NA                    | Hypomethylated in P3F versus P7F |
| cg04094653 | 0.380    | 0.659    | -0.279    | 0.032            | NA                    | Hypomethylated in P3F versus P7F |
| cg07395354 | 0.405    | 0.666    | -0.260    | 0.038            | MEOX2                 | Hypomethylated in P3F versus P7F |
| cg16707895 | 0.421    | 0.674    | -0.253    | 0.038            | NA                    | Hypomethylated in P3F versus P7F |
| cg26695758 | 0.372    | 0.629    | -0.257    | 0.043            | NA                    | Hypomethylated in P3F versus P7F |
| cg00839579 | 0.343    | 0.594    | -0.251    | 0.049            | MEOX2                 | Hypomethylated in P3F versus P7F |
| cg21568106 | 0.254    | 0.512    | -0.258    | 0.049            | NA                    | Hypomethylated in P3F versus P7F |
