# Supplementary material
Source: PubMed Central journal article supplement (PMC7415348)
Supplement: NIHMS1610503-supplement-Supplementary_Table_4.pdf [file NIHMS1610503-supplement-Supplementary_Table_4.pdf]

Supplementary Table 4. CDKN1C immunohistochemical staining on *PAX3-FOXO1*- versus *PAX7-FOXO1*-positive tumors from CHOP and COG TMAs

|                             | CDKN1C Expression (n, %) |           |           | P value |
|-----------------------------|--------------------------|-----------|-----------|---------|
|                             | No / weak                | Moderate  | Strong    |         |
| <b>TMA #1</b>               |                          |           |           |         |
| <i>PAX3-FOXO1</i> -positive | 4 (33.3%)                | 4 (33.3%) | 4 (33.3%) | < 0.05  |
| <i>PAX7-FOXO1</i> -positive | 0 (0%)                   | 0 (0%)    | 6 (100%)  |         |
| <b>TMA #2</b>               |                          |           |           |         |
| <i>PAX3-FOXO1</i> -positive | 24 (88.9%)               | 2 (7.4%)  | 1 (3.7%)  | < 0.01  |
| <i>PAX7-FOXO1</i> -positive | 5 (41.7%)                | 5 (41.7%) | 2 (16.7%) |         |
