# Supplementary material
Source: PubMed Central journal article supplement (PMC7415348)
Supplement: NIHMS1610503-supplement-Supplementary_Table_5.pdf [file NIHMS1610503-supplement-Supplementary_Table_5.pdf]

**Supplementary Table 5. Differentially methylated probes in RAS mutant versus wild-type FN tumors**

| Probe      | RASmut.mean | RASwt.mean | Mean.diff | P.value | Promoter.related.gene | Category                            |
|------------|-------------|------------|-----------|---------|-----------------------|-------------------------------------|
| cg03244411 | 0.641       | 0.309      | 0.332     | 0       | NA                    | Hypermethylated in RAS mut vs wt FN |
| cg03442569 | 0.583       | 0.219      | 0.364     | 0       | NA                    | Hypermethylated in RAS mut vs wt FN |
| cg21334598 | 0.707       | 0.344      | 0.363     | 0       | NA                    | Hypermethylated in RAS mut vs wt FN |
| cg16192707 | 0.630       | 0.302      | 0.328     | 0       | NA                    | Hypermethylated in RAS mut vs wt FN |
| cg04537567 | 0.456       | 0.164      | 0.292     | 0       | NA                    | Hypermethylated in RAS mut vs wt FN |
| cg24931520 | 0.602       | 0.326      | 0.276     | 0       | NA                    | Hypermethylated in RAS mut vs wt FN |
| cg14434870 | 0.627       | 0.351      | 0.276     | 0       | NA                    | Hypermethylated in RAS mut vs wt FN |
| cg09249404 | 0.563       | 0.283      | 0.281     | 0       | NA                    | Hypermethylated in RAS mut vs wt FN |
| cg23223319 | 0.587       | 0.324      | 0.263     | 0       | NA                    | Hypermethylated in RAS mut vs wt FN |
| cg18018027 | 0.460       | 0.151      | 0.310     | 0       | NA                    | Hypermethylated in RAS mut vs wt FN |
| cg21126183 | 0.417       | 0.126      | 0.291     | 0       | NA                    | Hypermethylated in RAS mut vs wt FN |
| cg14367020 | 0.656       | 0.372      | 0.283     | 0       | NA                    | Hypermethylated in RAS mut vs wt FN |
| cg21305834 | 0.644       | 0.373      | 0.271     | 0       | NA                    | Hypermethylated in RAS mut vs wt FN |
| cg12380339 | 0.716       | 0.398      | 0.318     | 0       | NA                    | Hypermethylated in RAS mut vs wt FN |
| cg11500797 | 0.746       | 0.471      | 0.275     | 0       | NA                    | Hypermethylated in RAS mut vs wt FN |
| cg27032146 | 0.721       | 0.445      | 0.276     | 0       | NA                    | Hypermethylated in RAS mut vs wt FN |
| cg02847649 | 0.702       | 0.417      | 0.285     | 0       | NA                    | Hypermethylated in RAS mut vs wt FN |
| cg17303756 | 0.541       | 0.194      | 0.347     | 0       | NA                    | Hypermethylated in RAS mut vs wt FN |
| cg02380531 | 0.559       | 0.232      | 0.327     | 0       | NA                    | Hypermethylated in RAS mut vs wt FN |
| cg00006081 | 0.708       | 0.445      | 0.263     | 0       | NA                    | Hypermethylated in RAS mut vs wt FN |
| cg24957695 | 0.611       | 0.338      | 0.273     | 0       | NA                    | Hypermethylated in RAS mut vs wt FN |
| cg24448969 | 0.574       | 0.277      | 0.298     | 0       | HMX2                  | Hypermethylated in RAS mut vs wt FN |
| cg12739584 | 0.521       | 0.251      | 0.270     | 0       | NA                    | Hypermethylated in RAS mut vs wt FN |
| cg17697633 | 0.851       | 0.558      | 0.293     | 0       | TFAP2A                | Hypermethylated in RAS mut vs wt FN |
| cg09016968 | 0.622       | 0.339      | 0.282     | 0       | NA                    | Hypermethylated in RAS mut vs wt FN |

**Supplementary Table 5 (continued)**

| Probe      | RASmut.mean | RASwt.mean | Mean.diff | P.value | Promoter.related.gene | Category                            |
|------------|-------------|------------|-----------|---------|-----------------------|-------------------------------------|
| cg11052202 | 0.593       | 0.278      | 0.314     | 0.000   | NA                    | Hypermethylated in RAS mut vs wt FN |
| cg18240331 | 0.739       | 0.449      | 0.290     | 0.000   | TFAP2A                | Hypermethylated in RAS mut vs wt FN |
| cg15810758 | 0.544       | 0.254      | 0.290     | 0.000   | NA                    | Hypermethylated in RAS mut vs wt FN |
| cg24684807 | 0.436       | 0.170      | 0.266     | 0.000   | NA                    | Hypermethylated in RAS mut vs wt FN |
| cg02162880 | 0.816       | 0.555      | 0.261     | 0.000   | TFAP2A                | Hypermethylated in RAS mut vs wt FN |
| cg09637273 | 0.608       | 0.339      | 0.269     | 0.000   | NA                    | Hypermethylated in RAS mut vs wt FN |
| cg05929882 | 0.531       | 0.252      | 0.279     | 0.000   | TBX5                  | Hypermethylated in RAS mut vs wt FN |
| cg17338430 | 0.762       | 0.455      | 0.307     | 0.000   | NA                    | Hypermethylated in RAS mut vs wt FN |
| cg13486532 | 0.765       | 0.503      | 0.262     | 0.000   | NA                    | Hypermethylated in RAS mut vs wt FN |
| cg01088410 | 0.806       | 0.483      | 0.324     | 0.000   | NA                    | Hypermethylated in RAS mut vs wt FN |
| cg21275135 | 0.510       | 0.229      | 0.281     | 0.000   | NA                    | Hypermethylated in RAS mut vs wt FN |
| cg07492757 | 0.810       | 0.554      | 0.256     | 0.000   | TFAP2A                | Hypermethylated in RAS mut vs wt FN |
| cg06103642 | 0.676       | 0.422      | 0.254     | 0.000   | NA                    | Hypermethylated in RAS mut vs wt FN |
| cg19290410 | 0.641       | 0.354      | 0.287     | 0.000   | TBX5                  | Hypermethylated in RAS mut vs wt FN |
| cg17259358 | 0.487       | 0.198      | 0.289     | 0.001   | NA                    | Hypermethylated in RAS mut vs wt FN |
| cg11751545 | 0.619       | 0.369      | 0.250     | 0.001   | NA                    | Hypermethylated in RAS mut vs wt FN |
| cg05545672 | 0.690       | 0.431      | 0.260     | 0.001   | NA                    | Hypermethylated in RAS mut vs wt FN |
| cg22870775 | 0.531       | 0.256      | 0.275     | 0.001   | NA                    | Hypermethylated in RAS mut vs wt FN |
| cg09383907 | 0.626       | 0.372      | 0.254     | 0.001   | NA                    | Hypermethylated in RAS mut vs wt FN |
| cg21434530 | 0.492       | 0.239      | 0.254     | 0.002   | NA                    | Hypermethylated in RAS mut vs wt FN |
| cg01692639 | 0.477       | 0.202      | 0.275     | 0.002   | NA                    | Hypermethylated in RAS mut vs wt FN |
| cg05368966 | 0.601       | 0.342      | 0.259     | 0.002   | NA                    | Hypermethylated in RAS mut vs wt FN |
| cg06273075 | 0.711       | 0.452      | 0.259     | 0.002   | MIR193B               | Hypermethylated in RAS mut vs wt FN |
| cg10420310 | 0.700       | 0.445      | 0.255     | 0.003   | MIR193B               | Hypermethylated in RAS mut vs wt FN |
| cg21534423 | 0.404       | 0.150      | 0.253     | 0.003   | NA                    | Hypermethylated in RAS mut vs wt FN |

**Supplementary Table 5 (continued)**

| Probe      | RASmut.mean | RASwt.mean | Mean.diff | P.value | Promoter.related.gene | Category                            |
|------------|-------------|------------|-----------|---------|-----------------------|-------------------------------------|
| cg16559598 | 0.647       | 0.373      | 0.274     | 0.003   | TBX5                  | Hypermethylated in RAS mut vs wt FN |
| cg23273897 | 0.614       | 0.357      | 0.257     | 0.003   | MME                   | Hypermethylated in RAS mut vs wt FN |
| cg10281002 | 0.724       | 0.471      | 0.253     | 0.004   | TBX5                  | Hypermethylated in RAS mut vs wt FN |
| cg08944170 | 0.751       | 0.451      | 0.300     | 0.004   | OR2L13                | Hypermethylated in RAS mut vs wt FN |
| cg04906879 | 0.740       | 0.473      | 0.267     | 0.004   | LOC440925_SP5         | Hypermethylated in RAS mut vs wt FN |
| cg00785941 | 0.671       | 0.410      | 0.262     | 0.004   | OR2L13                | Hypermethylated in RAS mut vs wt FN |
| cg01837362 | 0.620       | 0.313      | 0.307     | 0.004   | NA                    | Hypermethylated in RAS mut vs wt FN |
| cg15855970 | 0.580       | 0.314      | 0.266     | 0.004   | NA                    | Hypermethylated in RAS mut vs wt FN |
| cg22071224 | 0.700       | 0.450      | 0.250     | 0.005   | LOC440925             | Hypermethylated in RAS mut vs wt FN |
| cg18074954 | 0.627       | 0.318      | 0.309     | 0.005   | NA                    | Hypermethylated in RAS mut vs wt FN |
| cg22345214 | 0.591       | 0.283      | 0.308     | 0.005   | GABRA4                | Hypermethylated in RAS mut vs wt FN |
| cg06083330 | 0.719       | 0.454      | 0.265     | 0.005   | NA                    | Hypermethylated in RAS mut vs wt FN |
| cg15377586 | 0.694       | 0.443      | 0.251     | 0.006   | LOC440925_SP5         | Hypermethylated in RAS mut vs wt FN |
| cg10514097 | 0.562       | 0.266      | 0.297     | 0.006   | FOXF1                 | Hypermethylated in RAS mut vs wt FN |
| cg00551679 | 0.673       | 0.392      | 0.282     | 0.007   | NA                    | Hypermethylated in RAS mut vs wt FN |
| cg04624110 | 0.640       | 0.317      | 0.323     | 0.007   | MACROD2               | Hypermethylated in RAS mut vs wt FN |
| cg23054189 | 0.651       | 0.293      | 0.358     | 0.007   | TRIM58                | Hypermethylated in RAS mut vs wt FN |
| cg20507276 | 0.706       | 0.434      | 0.271     | 0.008   | OR2L13                | Hypermethylated in RAS mut vs wt FN |
| cg01552272 | 0.574       | 0.277      | 0.297     | 0.008   | MACROD2               | Hypermethylated in RAS mut vs wt FN |
| cg25951981 | 0.578       | 0.290      | 0.289     | 0.008   | GABRA4                | Hypermethylated in RAS mut vs wt FN |
| cg07533148 | 0.634       | 0.292      | 0.342     | 0.008   | TRIM58                | Hypermethylated in RAS mut vs wt FN |
| cg20810478 | 0.647       | 0.288      | 0.359     | 0.009   | TRIM58                | Hypermethylated in RAS mut vs wt FN |
| cg20146541 | 0.623       | 0.282      | 0.341     | 0.009   | TRIM58                | Hypermethylated in RAS mut vs wt FN |
| cg24154839 | 0.622       | 0.320      | 0.302     | 0.009   | GABRA4                | Hypermethylated in RAS mut vs wt FN |
| cg04407470 | 0.568       | 0.309      | 0.259     | 0.009   | NA                    | Hypermethylated in RAS mut vs wt FN |

**Supplementary Table 5 (continued)**

| Probe      | RASmut.mean | RASwt.mean | Mean.diff | P.value | Promoter.related.gene | Category                            |
|------------|-------------|------------|-----------|---------|-----------------------|-------------------------------------|
| cg03692651 | 0.823       | 0.570      | 0.254     | 0.009   | NA                    | Hypermethylated in RAS mut vs wt FN |
| cg21802055 | 0.561       | 0.276      | 0.284     | 0.009   | NA                    | Hypermethylated in RAS mut vs wt FN |
| cg10983544 | 0.487       | 0.218      | 0.268     | 0.009   | TRIM58                | Hypermethylated in RAS mut vs wt FN |
| cg16976370 | 0.623       | 0.314      | 0.310     | 0.009   | GABRA4                | Hypermethylated in RAS mut vs wt FN |
| cg23169957 | 0.583       | 0.280      | 0.303     | 0.009   | MACROD2               | Hypermethylated in RAS mut vs wt FN |
| cg16021909 | 0.584       | 0.275      | 0.310     | 0.009   | NA                    | Hypermethylated in RAS mut vs wt FN |
| cg03748376 | 0.741       | 0.446      | 0.295     | 0.009   | OR2L13                | Hypermethylated in RAS mut vs wt FN |
| cg25557432 | 0.550       | 0.243      | 0.308     | 0.010   | MACROD2               | Hypermethylated in RAS mut vs wt FN |
| cg13713830 | 0.636       | 0.380      | 0.256     | 0.010   | NA                    | Hypermethylated in RAS mut vs wt FN |
| cg00046499 | 0.689       | 0.410      | 0.279     | 0.011   | NA                    | Hypermethylated in RAS mut vs wt FN |
| cg20429172 | 0.676       | 0.356      | 0.320     | 0.011   | TRIM58                | Hypermethylated in RAS mut vs wt FN |
| cg08447525 | 0.561       | 0.309      | 0.252     | 0.011   | GPR149                | Hypermethylated in RAS mut vs wt FN |
| cg23191956 | 0.472       | 0.217      | 0.255     | 0.011   | FOXG1                 | Hypermethylated in RAS mut vs wt FN |
| cg26157385 | 0.561       | 0.280      | 0.281     | 0.012   | TRIM58                | Hypermethylated in RAS mut vs wt FN |
| cg24080577 | 0.582       | 0.311      | 0.270     | 0.012   | HS3ST1                | Hypermethylated in RAS mut vs wt FN |
| cg25440035 | 0.624       | 0.352      | 0.272     | 0.012   | NA                    | Hypermethylated in RAS mut vs wt FN |
| cg05057720 | 0.777       | 0.502      | 0.274     | 0.014   | CLEC14A               | Hypermethylated in RAS mut vs wt FN |
| cg10530883 | 0.502       | 0.224      | 0.278     | 0.015   | IRX1                  | Hypermethylated in RAS mut vs wt FN |
| cg23358625 | 0.743       | 0.489      | 0.254     | 0.016   | RPSAP58               | Hypermethylated in RAS mut vs wt FN |
| cg05475934 | 0.699       | 0.447      | 0.252     | 0.017   | APBB1IP               | Hypermethylated in RAS mut vs wt FN |
| cg09789636 | 0.637       | 0.363      | 0.275     | 0.017   | NA                    | Hypermethylated in RAS mut vs wt FN |
| cg17861230 | 0.683       | 0.370      | 0.313     | 0.017   | NA                    | Hypermethylated in RAS mut vs wt FN |
| cg11671688 | 0.734       | 0.465      | 0.270     | 0.018   | GPR6                  | Hypermethylated in RAS mut vs wt FN |
| cg05347845 | 0.667       | 0.404      | 0.263     | 0.018   | ACTA1                 | Hypermethylated in RAS mut vs wt FN |
| cg04480386 | 0.472       | 0.218      | 0.255     | 0.019   | NA                    | Hypermethylated in RAS mut vs wt FN |

### Supplementary Table 5 (continued)

| Probe      | RASmut.mean | RASwt.mean | Mean.diff | P.value | Promoter.related.gene | Category                            |
|------------|-------------|------------|-----------|---------|-----------------------|-------------------------------------|
| cg05605052 | 0.639       | 0.372      | 0.267     | 0.019   | RPSAP58               | Hypermethylated in RAS mut vs wt FN |
| cg16404157 | 0.790       | 0.534      | 0.255     | 0.020   | CLEC14A               | Hypermethylated in RAS mut vs wt FN |
| cg16690757 | 0.554       | 0.280      | 0.274     | 0.022   | NA                    | Hypermethylated in RAS mut vs wt FN |
| cg21834207 | 0.509       | 0.242      | 0.267     | 0.026   | AGBL4                 | Hypermethylated in RAS mut vs wt FN |
| cg12185828 | 0.580       | 0.300      | 0.279     | 0.027   | GCA                   | Hypermethylated in RAS mut vs wt FN |
| cg03145999 | 0.611       | 0.343      | 0.268     | 0.030   | ZSCAN18               | Hypermethylated in RAS mut vs wt FN |
| cg16269733 | 0.709       | 0.445      | 0.264     | 0.030   | NA                    | Hypermethylated in RAS mut vs wt FN |
| cg18884037 | 0.487       | 0.208      | 0.279     | 0.032   | KHDRBS2               | Hypermethylated in RAS mut vs wt FN |
| cg01963134 | 0.636       | 0.360      | 0.276     | 0.032   | CPNE8                 | Hypermethylated in RAS mut vs wt FN |
| cg21784036 | 0.562       | 0.290      | 0.271     | 0.035   | CPNE8                 | Hypermethylated in RAS mut vs wt FN |
| cg13509195 | 0.579       | 0.294      | 0.285     | 0.036   | CPNE8                 | Hypermethylated in RAS mut vs wt FN |
| cg06781135 | 0.645       | 0.376      | 0.269     | 0.038   | LOC100270746          | Hypermethylated in RAS mut vs wt FN |
| cg19098763 | 0.602       | 0.327      | 0.275     | 0.039   | ELAVL4                | Hypermethylated in RAS mut vs wt FN |
| cg22014661 | 0.485       | 0.228      | 0.257     | 0.043   | KHDRBS2               | Hypermethylated in RAS mut vs wt FN |
| cg14229668 | 0.595       | 0.338      | 0.257     | 0.043   | GCA                   | Hypermethylated in RAS mut vs wt FN |
| cg06629130 | 0.631       | 0.376      | 0.256     | 0.046   | NA                    | Hypermethylated in RAS mut vs wt FN |
| cg02162286 | 0.610       | 0.330      | 0.280     | 0.047   | NA                    | Hypermethylated in RAS mut vs wt FN |
| cg07363657 | 0.365       | 0.701      | -0.336    | 0.000   | NA                    | Hypomethylated in RAS mut vs wt FN  |
| cg13700197 | 0.552       | 0.820      | -0.268    | 0.000   | NA                    | Hypomethylated in RAS mut vs wt FN  |
| cg25279294 | 0.352       | 0.645      | -0.293    | 0.000   | OR4D1                 | Hypomethylated in RAS mut vs wt FN  |
| cg23261846 | 0.422       | 0.686      | -0.264    | 0.000   | NA                    | Hypomethylated in RAS mut vs wt FN  |
| cg26090775 | 0.172       | 0.470      | -0.298    | 0.000   | NA                    | Hypomethylated in RAS mut vs wt FN  |
| cg21591693 | 0.435       | 0.713      | -0.278    | 0.000   | NA                    | Hypomethylated in RAS mut vs wt FN  |
| cg06042826 | 0.443       | 0.703      | -0.260    | 0.000   | NA                    | Hypomethylated in RAS mut vs wt FN  |
| cg24239420 | 0.427       | 0.691      | -0.263    | 0.000   | NA                    | Hypomethylated in RAS mut vs wt FN  |

**Supplementary Table 5 (continued)**

| Probe      | RASmut.mean | RASwt.mean | Mean.diff | P.value | Promoter.related.gene | Category                           |
|------------|-------------|------------|-----------|---------|-----------------------|------------------------------------|
| cg07190012 | 0.172       | 0.434      | -0.262    | 0       | NA                    | Hypomethylated in RAS mut vs wt FN |
| cg08113628 | 0.322       | 0.588      | -0.266    | 0       | NA                    | Hypomethylated in RAS mut vs wt FN |
| cg12494373 | 0.303       | 0.581      | -0.278    | 0       | NA                    | Hypomethylated in RAS mut vs wt FN |
| cg13638737 | 0.374       | 0.648      | -0.274    | 0       | NA                    | Hypomethylated in RAS mut vs wt FN |
| cg01296395 | 0.309       | 0.584      | -0.274    | 0       | NA                    | Hypomethylated in RAS mut vs wt FN |
| cg22466678 | 0.197       | 0.506      | -0.309    | 0       | NA                    | Hypomethylated in RAS mut vs wt FN |
| cg02713162 | 0.228       | 0.497      | -0.269    | 0       | NA                    | Hypomethylated in RAS mut vs wt FN |
| cg15374435 | 0.129       | 0.449      | -0.320    | 0       | NA                    | Hypomethylated in RAS mut vs wt FN |
| cg22573118 | 0.359       | 0.653      | -0.294    | 0       | CCR3                  | Hypomethylated in RAS mut vs wt FN |
| cg26635451 | 0.282       | 0.583      | -0.301    | 0       | NA                    | Hypomethylated in RAS mut vs wt FN |
| cg20253855 | 0.261       | 0.518      | -0.257    | 0       | NA                    | Hypomethylated in RAS mut vs wt FN |
| cg10015974 | 0.360       | 0.625      | -0.265    | 0       | NA                    | Hypomethylated in RAS mut vs wt FN |
| cg11032640 | 0.389       | 0.641      | -0.251    | 0       | NA                    | Hypomethylated in RAS mut vs wt FN |
| cg00110846 | 0.324       | 0.580      | -0.256    | 0       | NA                    | Hypomethylated in RAS mut vs wt FN |
| cg05589489 | 0.234       | 0.584      | -0.351    | 0       | NA                    | Hypomethylated in RAS mut vs wt FN |
| cg05403689 | 0.379       | 0.688      | -0.309    | 0       | NA                    | Hypomethylated in RAS mut vs wt FN |
| cg26732360 | 0.422       | 0.684      | -0.261    | 0       | NA                    | Hypomethylated in RAS mut vs wt FN |
| cg03024678 | 0.283       | 0.567      | -0.284    | 0       | NA                    | Hypomethylated in RAS mut vs wt FN |
| cg26912671 | 0.267       | 0.544      | -0.277    | 0       | PDE4B                 | Hypomethylated in RAS mut vs wt FN |
| cg15296664 | 0.324       | 0.623      | -0.300    | 0       | NA                    | Hypomethylated in RAS mut vs wt FN |
| cg21034034 | 0.459       | 0.720      | -0.261    | 0       | NA                    | Hypomethylated in RAS mut vs wt FN |
| cg08802841 | 0.240       | 0.565      | -0.325    | 0       | NA                    | Hypomethylated in RAS mut vs wt FN |
| cg13519918 | 0.242       | 0.546      | -0.304    | 0       | NA                    | Hypomethylated in RAS mut vs wt FN |
| cg06282556 | 0.322       | 0.576      | -0.254    | 0       | NA                    | Hypomethylated in RAS mut vs wt FN |
| cg23191950 | 0.351       | 0.617      | -0.266    | 0       | ALDH1A3               | Hypomethylated in RAS mut vs wt FN |

**Supplementary Table 5 (continued)**

| <b>Probe</b> | <b>RASmut.mean</b> | <b>RASwt.mean</b> | <b>Mean.diff</b> | <b>P.value</b> | <b>Promoter.related.gene</b> | <b>Category</b>                    |
|--------------|--------------------|-------------------|------------------|----------------|------------------------------|------------------------------------|
| cg11543937   | 0.375              | 0.676             | -0.302           | 0.001          | SPINK5                       | Hypomethylated in RAS mut vs wt FN |
| cg18607411   | 0.182              | 0.435             | -0.253           | 0.001          | NA                           | Hypomethylated in RAS mut vs wt FN |
| cg07179669   | 0.143              | 0.400             | -0.257           | 0.001          | NA                           | Hypomethylated in RAS mut vs wt FN |
| cg17502594   | 0.321              | 0.577             | -0.257           | 0.001          | NA                           | Hypomethylated in RAS mut vs wt FN |
| cg17367545   | 0.435              | 0.704             | -0.269           | 0.001          | NA                           | Hypomethylated in RAS mut vs wt FN |
| cg12905371   | 0.282              | 0.548             | -0.265           | 0.001          | NA                           | Hypomethylated in RAS mut vs wt FN |
| cg09174502   | 0.319              | 0.599             | -0.280           | 0.001          | NA                           | Hypomethylated in RAS mut vs wt FN |
| cg14580211   | 0.333              | 0.635             | -0.302           | 0.001          | NA                           | Hypomethylated in RAS mut vs wt FN |
| cg21306949   | 0.270              | 0.538             | -0.269           | 0.001          | NA                           | Hypomethylated in RAS mut vs wt FN |
| cg01093028   | 0.415              | 0.690             | -0.275           | 0.001          | NA                           | Hypomethylated in RAS mut vs wt FN |
| cg18391978   | 0.267              | 0.539             | -0.273           | 0.001          | NA                           | Hypomethylated in RAS mut vs wt FN |
| cg08035234   | 0.240              | 0.525             | -0.285           | 0.001          | NA                           | Hypomethylated in RAS mut vs wt FN |
| cg19022814   | 0.193              | 0.448             | -0.255           | 0.001          | NA                           | Hypomethylated in RAS mut vs wt FN |
| cg25131544   | 0.210              | 0.469             | -0.259           | 0.001          | NA                           | Hypomethylated in RAS mut vs wt FN |
| cg02767633   | 0.272              | 0.524             | -0.252           | 0.001          | NA                           | Hypomethylated in RAS mut vs wt FN |
| cg00361495   | 0.179              | 0.431             | -0.252           | 0.001          | TRIL                         | Hypomethylated in RAS mut vs wt FN |
| cg09883659   | 0.427              | 0.697             | -0.270           | 0.002          | NA                           | Hypomethylated in RAS mut vs wt FN |
| cg07473822   | 0.516              | 0.777             | -0.262           | 0.002          | NA                           | Hypomethylated in RAS mut vs wt FN |
| cg21864304   | 0.470              | 0.748             | -0.278           | 0.002          | NA                           | Hypomethylated in RAS mut vs wt FN |
| cg04687515   | 0.363              | 0.615             | -0.252           | 0.002          | NA                           | Hypomethylated in RAS mut vs wt FN |
| cg10499974   | 0.450              | 0.749             | -0.300           | 0.002          | NA                           | Hypomethylated in RAS mut vs wt FN |
| cg26516362   | 0.069              | 0.361             | -0.292           | 0.003          | RUFY1                        | Hypomethylated in RAS mut vs wt FN |
| cg02136620   | 0.229              | 0.479             | -0.250           | 0.003          | RUFY1                        | Hypomethylated in RAS mut vs wt FN |
| cg09805254   | 0.445              | 0.697             | -0.252           | 0.003          | NA                           | Hypomethylated in RAS mut vs wt FN |
| cg02051616   | 0.121              | 0.377             | -0.256           | 0.003          | NA                           | Hypomethylated in RAS mut vs wt FN |

### Supplementary Table 5 (continued)

| Probe      | RASmut.mean | RASwt.mean | Mean.diff | P.value | Promoter.related.gene | Category                           |
|------------|-------------|------------|-----------|---------|-----------------------|------------------------------------|
| cg01916918 | 0.330       | 0.591      | -0.260    | 0.004   | NA                    | Hypomethylated in RAS mut vs wt FN |
| cg18256640 | 0.465       | 0.724      | -0.259    | 0.005   | NA                    | Hypomethylated in RAS mut vs wt FN |
| cg07616471 | 0.290       | 0.552      | -0.261    | 0.005   | NA                    | Hypomethylated in RAS mut vs wt FN |
| cg15929797 | 0.154       | 0.531      | -0.377    | 0.005   | NA                    | Hypomethylated in RAS mut vs wt FN |
| cg00080972 | 0.124       | 0.414      | -0.290    | 0.006   | RUFY1                 | Hypomethylated in RAS mut vs wt FN |
| cg09060608 | 0.118       | 0.389      | -0.271    | 0.006   | RUFY1                 | Hypomethylated in RAS mut vs wt FN |
| cg00982919 | 0.209       | 0.504      | -0.296    | 0.006   | NA                    | Hypomethylated in RAS mut vs wt FN |
| cg05638439 | 0.323       | 0.639      | -0.316    | 0.006   | NA                    | Hypomethylated in RAS mut vs wt FN |
| cg21226059 | 0.073       | 0.374      | -0.301    | 0.007   | RUFY1                 | Hypomethylated in RAS mut vs wt FN |
| cg14820908 | 0.104       | 0.405      | -0.302    | 0.007   | RUFY1                 | Hypomethylated in RAS mut vs wt FN |
| cg05457628 | 0.085       | 0.346      | -0.261    | 0.007   | RUFY1                 | Hypomethylated in RAS mut vs wt FN |
| cg11068784 | 0.337       | 0.626      | -0.289    | 0.010   | NA                    | Hypomethylated in RAS mut vs wt FN |
| cg08686011 | 0.391       | 0.644      | -0.254    | 0.013   | NA                    | Hypomethylated in RAS mut vs wt FN |
| cg08946658 | 0.435       | 0.695      | -0.259    | 0.014   | NA                    | Hypomethylated in RAS mut vs wt FN |
| cg04405612 | 0.380       | 0.655      | -0.276    | 0.015   | NA                    | Hypomethylated in RAS mut vs wt FN |
| cg11230031 | 0.260       | 0.519      | -0.259    | 0.016   | NA                    | Hypomethylated in RAS mut vs wt FN |
| cg02852791 | 0.253       | 0.522      | -0.268    | 0.018   | NA                    | Hypomethylated in RAS mut vs wt FN |
| cg23286646 | 0.316       | 0.584      | -0.268    | 0.019   | NA                    | Hypomethylated in RAS mut vs wt FN |
| cg03287339 | 0.273       | 0.527      | -0.254    | 0.020   | NA                    | Hypomethylated in RAS mut vs wt FN |
