# Supplementary material
Source: PubMed Central journal article supplement (PMC7415348)
Supplement: NIHMS1610503-supplement-Supplementary_Table_6.pdf [file NIHMS1610503-supplement-Supplementary_Table_6.pdf]

**Supplementary Table 6. Differentially methylated probes in RAS pathway mutant versus wild-type FN tumors**

| Probe      | RAS.P.mut.mean | RAS.P.wt.mean | Mean.diff | Adjusted.P.value | Promoter.related.gene | Category                              |
|------------|----------------|---------------|-----------|------------------|-----------------------|---------------------------------------|
| cg10872445 | 0.639          | 0.296         | 0.343     | 0.025            | NA                    | Hypermethylated in RAS.P mut vs wt FN |
| cg14434870 | 0.581          | 0.277         | 0.304     | 0.026            | NA                    | Hypermethylated in RAS.P mut vs wt FN |
| cg23697410 | 0.394          | 0.132         | 0.262     | 0.044            | NA                    | Hypermethylated in RAS.P mut vs wt FN |
| cg26090775 | 0.196          | 0.582         | -0.385    | 0.007            | NA                    | Hypomethylated in RAS.P mut vs wt FN  |
| cg07190012 | 0.186          | 0.530         | -0.345    | 0.009            | NA                    | Hypomethylated in RAS.P mut vs wt FN  |
| cg08329754 | 0.273          | 0.586         | -0.313    | 0.009            | NA                    | Hypomethylated in RAS.P mut vs wt FN  |
| cg13691961 | 0.329          | 0.602         | -0.273    | 0.012            | NA                    | Hypomethylated in RAS.P mut vs wt FN  |
| cg15374435 | 0.155          | 0.537         | -0.382    | 0.015            | NA                    | Hypomethylated in RAS.P mut vs wt FN  |
| cg02928365 | 0.226          | 0.530         | -0.303    | 0.015            | NA                    | Hypomethylated in RAS.P mut vs wt FN  |
| cg02713162 | 0.245          | 0.582         | -0.336    | 0.015            | NA                    | Hypomethylated in RAS.P mut vs wt FN  |
| cg22466678 | 0.238          | 0.605         | -0.366    | 0.015            | NA                    | Hypomethylated in RAS.P mut vs wt FN  |
| cg05589489 | 0.284          | 0.690         | -0.406    | 0.015            | NA                    | Hypomethylated in RAS.P mut vs wt FN  |
| cg08113628 | 0.342          | 0.675         | -0.333    | 0.015            | NA                    | Hypomethylated in RAS.P mut vs wt FN  |
| cg14959707 | 0.315          | 0.587         | -0.272    | 0.015            | ZC3H7A                | Hypomethylated in RAS.P mut vs wt FN  |
| cg05403689 | 0.419          | 0.783         | -0.363    | 0.015            | NA                    | Hypomethylated in RAS.P mut vs wt FN  |
| cg26912671 | 0.275          | 0.656         | -0.382    | 0.015            | PDE4B                 | Hypomethylated in RAS.P mut vs wt FN  |
| cg26635451 | 0.327          | 0.670         | -0.343    | 0.015            | NA                    | Hypomethylated in RAS.P mut vs wt FN  |
| cg08951638 | 0.166          | 0.428         | -0.262    | 0.015            | NA                    | Hypomethylated in RAS.P mut vs wt FN  |
| cg08802841 | 0.281          | 0.672         | -0.391    | 0.015            | NA                    | Hypomethylated in RAS.P mut vs wt FN  |
| cg20711695 | 0.428          | 0.722         | -0.294    | 0.015            | NA                    | Hypomethylated in RAS.P mut vs wt FN  |
| cg15296664 | 0.364          | 0.715         | -0.351    | 0.015            | NA                    | Hypomethylated in RAS.P mut vs wt FN  |
| cg09044868 | 0.325          | 0.693         | -0.367    | 0.015            | NA                    | Hypomethylated in RAS.P mut vs wt FN  |
| cg22041228 | 0.134          | 0.447         | -0.312    | 0.015            | NA                    | Hypomethylated in RAS.P mut vs wt FN  |
| cg13519918 | 0.282          | 0.642         | -0.360    | 0.018            | NA                    | Hypomethylated in RAS.P mut vs wt FN  |
| cg26277026 | 0.380          | 0.647         | -0.268    | 0.018            | NA                    | Hypomethylated in RAS.P mut vs wt FN  |

**Supplementary Table 6 (continued)**

| Probe      | RAS.P.mut.mean | RAS.P.wt.mean | Mean.diff | Adjusted.P.value | Promoter.related.gene | Category                             |
|------------|----------------|---------------|-----------|------------------|-----------------------|--------------------------------------|
| cg11542394 | 0.482          | 0.744         | -0.261    | 0.018            | ALDH1A3               | Hypomethylated in RAS.P mut vs wt FN |
| cg20769997 | 0.354          | 0.640         | -0.286    | 0.018            | NA                    | Hypomethylated in RAS.P mut vs wt FN |
| cg03794617 | 0.324          | 0.622         | -0.298    | 0.020            | NA                    | Hypomethylated in RAS.P mut vs wt FN |
| cg26065534 | 0.528          | 0.799         | -0.271    | 0.020            | NA                    | Hypomethylated in RAS.P mut vs wt FN |
| cg18698884 | 0.443          | 0.738         | -0.295    | 0.020            | NA                    | Hypomethylated in RAS.P mut vs wt FN |
| cg18864124 | 0.349          | 0.609         | -0.260    | 0.020            | NA                    | Hypomethylated in RAS.P mut vs wt FN |
| cg07179669 | 0.155          | 0.484         | -0.330    | 0.022            | NA                    | Hypomethylated in RAS.P mut vs wt FN |
| cg03173528 | 0.277          | 0.567         | -0.289    | 0.023            | NA                    | Hypomethylated in RAS.P mut vs wt FN |
| cg22369786 | 0.143          | 0.410         | -0.267    | 0.023            | NA                    | Hypomethylated in RAS.P mut vs wt FN |
| cg06000878 | 0.221          | 0.508         | -0.287    | 0.023            | NA                    | Hypomethylated in RAS.P mut vs wt FN |
| cg14387312 | 0.286          | 0.570         | -0.284    | 0.023            | NA                    | Hypomethylated in RAS.P mut vs wt FN |
| cg14082739 | 0.361          | 0.616         | -0.256    | 0.024            | NA                    | Hypomethylated in RAS.P mut vs wt FN |
| cg26277599 | 0.303          | 0.562         | -0.259    | 0.029            | NA                    | Hypomethylated in RAS.P mut vs wt FN |
| cg14651210 | 0.357          | 0.616         | -0.258    | 0.031            | NA                    | Hypomethylated in RAS.P mut vs wt FN |
| cg22698272 | 0.278          | 0.573         | -0.296    | 0.032            | NA                    | Hypomethylated in RAS.P mut vs wt FN |
| cg23191950 | 0.385          | 0.690         | -0.305    | 0.033            | ALDH1A3               | Hypomethylated in RAS.P mut vs wt FN |
| cg21038418 | 0.446          | 0.720         | -0.274    | 0.034            | NA                    | Hypomethylated in RAS.P mut vs wt FN |
| cg25939380 | 0.299          | 0.601         | -0.302    | 0.034            | NA                    | Hypomethylated in RAS.P mut vs wt FN |
| cg01093028 | 0.447          | 0.779         | -0.332    | 0.036            | NA                    | Hypomethylated in RAS.P mut vs wt FN |
| cg17943647 | 0.333          | 0.593         | -0.260    | 0.039            | TRIM2                 | Hypomethylated in RAS.P mut vs wt FN |
| cg23235067 | 0.344          | 0.642         | -0.297    | 0.039            | NA                    | Hypomethylated in RAS.P mut vs wt FN |
| cg13307782 | 0.378          | 0.681         | -0.304    | 0.043            | NA                    | Hypomethylated in RAS.P mut vs wt FN |
| cg09884146 | 0.170          | 0.452         | -0.282    | 0.045            | SPRED2                | Hypomethylated in RAS.P mut vs wt FN |
| cg00743540 | 0.484          | 0.768         | -0.284    | 0.047            | NA                    | Hypomethylated in RAS.P mut vs wt FN |
| cg11469308 | 0.304          | 0.568         | -0.264    | 0.047            | NA                    | Hypomethylated in RAS.P mut vs wt FN |
| cg23735290 | 0.364          | 0.628         | -0.264    | 0.048            | NA                    | Hypomethylated in RAS.P mut vs wt FN |
