# Supplementary material
Source: PubMed Central journal article supplement (PMC7415348)
Supplement: NIHMS1610503-supplement-Supplementary_Table_7.pdf [file NIHMS1610503-supplement-Supplementary_Table_7.pdf]

**Supplementary Table 7. Differentially methylated probes in FP versus FN tumors**

| Probe      | FP.mean | FN.mean | Mean.diff | Adjusted.P.value | Promoter.related.gene | Category                    |
|------------|---------|---------|-----------|------------------|-----------------------|-----------------------------|
| cg08924374 | 0.741   | 0.101   | 0.640     | 4e-29            | NA                    | Hypermethylated in FP vs FN |
| cg15033036 | 0.822   | 0.088   | 0.734     | 1e-27            | NA                    | Hypermethylated in FP vs FN |
| cg13500797 | 0.791   | 0.067   | 0.724     | 1e-26            | NA                    | Hypermethylated in FP vs FN |
| cg23155911 | 0.716   | 0.166   | 0.550     | 4e-24            | NA                    | Hypermethylated in FP vs FN |
| cg06918474 | 0.721   | 0.076   | 0.645     | 2e-23            | NA                    | Hypermethylated in FP vs FN |
| cg05730150 | 0.480   | 0.095   | 0.385     | 6e-22            | NA                    | Hypermethylated in FP vs FN |
| cg25568066 | 0.694   | 0.123   | 0.571     | 7e-20            | NA                    | Hypermethylated in FP vs FN |
| cg17333042 | 0.686   | 0.195   | 0.491     | 6e-19            | NA                    | Hypermethylated in FP vs FN |
| cg02500231 | 0.827   | 0.236   | 0.591     | 2e-18            | NA                    | Hypermethylated in FP vs FN |
| cg20161791 | 0.728   | 0.116   | 0.612     | 1e-17            | LFNG                  | Hypermethylated in FP vs FN |
| cg08710597 | 0.728   | 0.205   | 0.522     | 2e-17            | NA                    | Hypermethylated in FP vs FN |
| cg13680188 | 0.756   | 0.144   | 0.611     | 2e-17            | GATA4                 | Hypermethylated in FP vs FN |
| cg23421128 | 0.829   | 0.286   | 0.543     | 6e-17            | NA                    | Hypermethylated in FP vs FN |
| cg16795466 | 0.751   | 0.128   | 0.623     | 8e-17            | GATA4                 | Hypermethylated in FP vs FN |
| cg16589299 | 0.718   | 0.096   | 0.622     | 2e-16            | NA                    | Hypermethylated in FP vs FN |
| cg05634149 | 0.750   | 0.119   | 0.632     | 2e-16            | NA                    | Hypermethylated in FP vs FN |
| cg21032292 | 0.769   | 0.113   | 0.655     | 2e-16            | NA                    | Hypermethylated in FP vs FN |
| cg09098624 | 0.723   | 0.138   | 0.585     | 3e-16            | NA                    | Hypermethylated in FP vs FN |
| cg07194839 | 0.800   | 0.343   | 0.457     | 5e-16            | NA                    | Hypermethylated in FP vs FN |
| cg27381488 | 0.704   | 0.167   | 0.537     | 6e-16            | NA                    | Hypermethylated in FP vs FN |
| cg03497907 | 0.672   | 0.125   | 0.547     | 1e-15            | NA                    | Hypermethylated in FP vs FN |
| cg25714956 | 0.819   | 0.243   | 0.576     | 2e-15            | NA                    | Hypermethylated in FP vs FN |
| cg10448808 | 0.801   | 0.156   | 0.644     | 4e-15            | FOXC2                 | Hypermethylated in FP vs FN |
| cg08228350 | 0.730   | 0.223   | 0.506     | 4e-15            | NA                    | Hypermethylated in FP vs FN |
| cg02816367 | 0.662   | 0.309   | 0.354     | 4e-15            | FYN                   | Hypermethylated in FP vs FN |

### Supplementary Table 7 (continued)

| Probe      | FP.mean | FN.mean | Mean.diff | Adjusted.P.value | Promoter.related.gene | Category                    |
|------------|---------|---------|-----------|------------------|-----------------------|-----------------------------|
| cg09890775 | 0.724   | 0.171   | 0.553     | 4e-15            | NA                    | Hypermethylated in FP vs FN |
| cg07310500 | 0.672   | 0.195   | 0.477     | 4e-15            | NA                    | Hypermethylated in FP vs FN |
| cg18190187 | 0.550   | 0.050   | 0.500     | 6e-15            | DRD1                  | Hypermethylated in FP vs FN |
| cg11215918 | 0.766   | 0.147   | 0.619     | 7e-15            | NA                    | Hypermethylated in FP vs FN |
| cg19641570 | 0.616   | 0.189   | 0.427     | 7e-15            | NA                    | Hypermethylated in FP vs FN |
| cg26618058 | 0.805   | 0.230   | 0.575     | 8e-15            | NA                    | Hypermethylated in FP vs FN |
| cg13920768 | 0.541   | 0.147   | 0.395     | 1e-14            | NA                    | Hypermethylated in FP vs FN |
| cg08089518 | 0.547   | 0.218   | 0.329     | 1e-14            | NA                    | Hypermethylated in FP vs FN |
| cg06931444 | 0.789   | 0.262   | 0.527     | 2e-14            | NA                    | Hypermethylated in FP vs FN |
| cg10829693 | 0.737   | 0.126   | 0.612     | 2e-14            | NA                    | Hypermethylated in FP vs FN |
| cg13269555 | 0.779   | 0.219   | 0.559     | 2e-14            | NA                    | Hypermethylated in FP vs FN |
| cg16782885 | 0.747   | 0.212   | 0.535     | 2e-14            | NA                    | Hypermethylated in FP vs FN |
| cg10904740 | 0.750   | 0.247   | 0.503     | 2e-14            | NA                    | Hypermethylated in FP vs FN |
| cg21273407 | 0.662   | 0.074   | 0.588     | 2e-14            | NOS1                  | Hypermethylated in FP vs FN |
| cg02654449 | 0.625   | 0.211   | 0.414     | 3e-14            | NA                    | Hypermethylated in FP vs FN |
| cg04582254 | 0.804   | 0.381   | 0.423     | 3e-14            | NA                    | Hypermethylated in FP vs FN |
| cg06389574 | 0.821   | 0.331   | 0.490     | 3e-14            | NA                    | Hypermethylated in FP vs FN |
| cg08818337 | 0.879   | 0.501   | 0.378     | 4e-14            | NA                    | Hypermethylated in FP vs FN |
| cg08904630 | 0.855   | 0.407   | 0.448     | 4e-14            | NA                    | Hypermethylated in FP vs FN |
| cg11487526 | 0.740   | 0.135   | 0.605     | 4e-14            | NA                    | Hypermethylated in FP vs FN |
| cg22045288 | 0.688   | 0.367   | 0.321     | 4e-14            | C10orf91              | Hypermethylated in FP vs FN |
| cg00968638 | 0.599   | 0.091   | 0.508     | 4e-14            | NA                    | Hypermethylated in FP vs FN |
| cg11575912 | 0.676   | 0.069   | 0.607     | 4e-14            | NA                    | Hypermethylated in FP vs FN |
| cg01678309 | 0.831   | 0.340   | 0.490     | 5e-14            | NA                    | Hypermethylated in FP vs FN |
| cg14409032 | 0.670   | 0.168   | 0.502     | 6e-14            | NA                    | Hypermethylated in FP vs FN |

### Supplementary Table 7 (continued)

| Probe      | FP.mean | FN.mean | Mean.diff | Adjusted.P.value | Promoter.related.gene | Category                    |
|------------|---------|---------|-----------|------------------|-----------------------|-----------------------------|
| cg03514843 | 0.784   | 0.331   | 0.453     | 6e-14            | EMILIN1               | Hypermethylated in FP vs FN |
| cg22047282 | 0.762   | 0.306   | 0.456     | 6e-14            | EMILIN1               | Hypermethylated in FP vs FN |
| cg24065957 | 0.828   | 0.432   | 0.396     | 7e-14            | NA                    | Hypermethylated in FP vs FN |
| cg10498921 | 0.770   | 0.245   | 0.525     | 7e-14            | NA                    | Hypermethylated in FP vs FN |
| cg10235355 | 0.763   | 0.189   | 0.575     | 7e-14            | NA                    | Hypermethylated in FP vs FN |
| cg09358973 | 0.712   | 0.173   | 0.540     | 7e-14            | NAV1                  | Hypermethylated in FP vs FN |
| cg02085210 | 0.374   | 0.067   | 0.307     | 8e-14            | ODC1                  | Hypermethylated in FP vs FN |
| cg05695937 | 0.688   | 0.086   | 0.602     | 9e-14            | NAV1                  | Hypermethylated in FP vs FN |
| cg20019720 | 0.735   | 0.246   | 0.489     | 1e-13            | CNKSR3                | Hypermethylated in FP vs FN |
| cg05300248 | 0.680   | 0.185   | 0.495     | 1e-13            | NA                    | Hypermethylated in FP vs FN |
| cg09780231 | 0.645   | 0.203   | 0.442     | 1e-13            | NA                    | Hypermethylated in FP vs FN |
| cg09911521 | 0.694   | 0.118   | 0.576     | 1e-13            | NA                    | Hypermethylated in FP vs FN |
| cg16207263 | 0.776   | 0.293   | 0.484     | 1e-13            | NA                    | Hypermethylated in FP vs FN |
| cg02449166 | 0.662   | 0.133   | 0.529     | 2e-13            | NA                    | Hypermethylated in FP vs FN |
| cg13551783 | 0.795   | 0.417   | 0.379     | 2e-13            | NA                    | Hypermethylated in FP vs FN |
| cg23829102 | 0.700   | 0.231   | 0.469     | 2e-13            | NA                    | Hypermethylated in FP vs FN |
| cg19031429 | 0.761   | 0.387   | 0.374     | 2e-13            | NA                    | Hypermethylated in FP vs FN |
| cg13071729 | 0.568   | 0.058   | 0.510     | 2e-13            | NAV1                  | Hypermethylated in FP vs FN |
| cg06568535 | 0.450   | 0.076   | 0.374     | 2e-13            | RBMS3                 | Hypermethylated in FP vs FN |
| cg23133355 | 0.835   | 0.387   | 0.447     | 2e-13            | NA                    | Hypermethylated in FP vs FN |
| cg01644798 | 0.792   | 0.333   | 0.459     | 2e-13            | NA                    | Hypermethylated in FP vs FN |
| cg14100888 | 0.598   | 0.103   | 0.495     | 2e-13            | NA                    | Hypermethylated in FP vs FN |
| cg24387126 | 0.822   | 0.373   | 0.448     | 3e-13            | NA                    | Hypermethylated in FP vs FN |
| cg13877482 | 0.734   | 0.388   | 0.346     | 3e-13            | NA                    | Hypermethylated in FP vs FN |
| cg12417362 | 0.589   | 0.066   | 0.523     | 3e-13            | NAV1                  | Hypermethylated in FP vs FN |

### Supplementary Table 7 (continued)

| Probe      | FP.mean | FN.mean | Mean.diff | Adjusted.P.value | Promoter.related.gene | Category                    |
|------------|---------|---------|-----------|------------------|-----------------------|-----------------------------|
| cg00472277 | 0.715   | 0.218   | 0.497     | 3e-13            | NA                    | Hypermethylated in FP vs FN |
| cg20516209 | 0.801   | 0.307   | 0.495     | 3e-13            | EMILIN1               | Hypermethylated in FP vs FN |
| cg18243853 | 0.762   | 0.188   | 0.574     | 3e-13            | NA                    | Hypermethylated in FP vs FN |
| cg04095069 | 0.812   | 0.412   | 0.400     | 3e-13            | NA                    | Hypermethylated in FP vs FN |
| cg02146032 | 0.621   | 0.182   | 0.439     | 3e-13            | NA                    | Hypermethylated in FP vs FN |
| cg10154597 | 0.747   | 0.317   | 0.430     | 3e-13            | NA                    | Hypermethylated in FP vs FN |
| cg23016472 | 0.755   | 0.200   | 0.555     | 4e-13            | NA                    | Hypermethylated in FP vs FN |
| cg12216863 | 0.672   | 0.151   | 0.522     | 4e-13            | NA                    | Hypermethylated in FP vs FN |
| cg08986340 | 0.479   | 0.119   | 0.361     | 4e-13            | NA                    | Hypermethylated in FP vs FN |
| cg11758841 | 0.819   | 0.423   | 0.396     | 4e-13            | NA                    | Hypermethylated in FP vs FN |
| cg00374717 | 0.853   | 0.444   | 0.409     | 4e-13            | NA                    | Hypermethylated in FP vs FN |
| cg05412333 | 0.802   | 0.224   | 0.578     | 4e-13            | GATA4                 | Hypermethylated in FP vs FN |
| cg13775299 | 0.593   | 0.126   | 0.467     | 5e-13            | NA                    | Hypermethylated in FP vs FN |
| cg25506288 | 0.671   | 0.184   | 0.488     | 5e-13            | NA                    | Hypermethylated in FP vs FN |
| cg08193650 | 0.646   | 0.062   | 0.583     | 5e-13            | NA                    | Hypermethylated in FP vs FN |
| cg17429870 | 0.743   | 0.254   | 0.490     | 5e-13            | NA                    | Hypermethylated in FP vs FN |
| cg04167595 | 0.740   | 0.180   | 0.560     | 5e-13            | NA                    | Hypermethylated in FP vs FN |
| cg19509663 | 0.818   | 0.366   | 0.452     | 5e-13            | NA                    | Hypermethylated in FP vs FN |
| cg24996315 | 0.795   | 0.329   | 0.466     | 6e-13            | NA                    | Hypermethylated in FP vs FN |
| cg14136893 | 0.866   | 0.365   | 0.501     | 6e-13            | NA                    | Hypermethylated in FP vs FN |
| cg08605965 | 0.811   | 0.323   | 0.488     | 6e-13            | NA                    | Hypermethylated in FP vs FN |
| cg16517702 | 0.594   | 0.060   | 0.534     | 6e-13            | NAV1                  | Hypermethylated in FP vs FN |
| cg25552843 | 0.491   | 0.151   | 0.340     | 7e-13            | NA                    | Hypermethylated in FP vs FN |
| cg25386707 | 0.564   | 0.085   | 0.480     | 7e-13            | NA                    | Hypermethylated in FP vs FN |
| cg18517266 | 0.776   | 0.132   | 0.644     | 7e-13            | NA                    | Hypermethylated in FP vs FN |

### Supplementary Table 7 (continued)

| Probe      | FP.mean | FN.mean | Mean.diff | Adjusted.P.value | Promoter.related.gene | Category                    |
|------------|---------|---------|-----------|------------------|-----------------------|-----------------------------|
| cg15019011 | 0.824   | 0.383   | 0.440     | 7e-13            | NA                    | Hypermethylated in FP vs FN |
| cg12102573 | 0.798   | 0.401   | 0.397     | 8e-13            | NA                    | Hypermethylated in FP vs FN |
| cg22153312 | 0.627   | 0.189   | 0.439     | 8e-13            | NA                    | Hypermethylated in FP vs FN |
| cg05738715 | 0.599   | 0.166   | 0.433     | 9e-13            | NA                    | Hypermethylated in FP vs FN |
| cg02187822 | 0.585   | 0.216   | 0.369     | 1e-12            | NA                    | Hypermethylated in FP vs FN |
| cg26995244 | 0.734   | 0.220   | 0.514     | 1e-12            | NA                    | Hypermethylated in FP vs FN |
| cg08379586 | 0.732   | 0.180   | 0.552     | 1e-12            | GATA4                 | Hypermethylated in FP vs FN |
| cg04030486 | 0.683   | 0.138   | 0.545     | 1e-12            | NA                    | Hypermethylated in FP vs FN |
| cg21006686 | 0.850   | 0.329   | 0.521     | 1e-12            | NOS1                  | Hypermethylated in FP vs FN |
| cg20011326 | 0.759   | 0.190   | 0.568     | 1e-12            | NA                    | Hypermethylated in FP vs FN |
| cg11132534 | 0.747   | 0.306   | 0.441     | 1e-12            | NA                    | Hypermethylated in FP vs FN |
| cg14834267 | 0.599   | 0.066   | 0.533     | 1e-12            | NAV1                  | Hypermethylated in FP vs FN |
| cg14021880 | 0.820   | 0.361   | 0.460     | 1e-12            | EMILIN1               | Hypermethylated in FP vs FN |
| cg12574576 | 0.734   | 0.306   | 0.428     | 2e-12            | NA                    | Hypermethylated in FP vs FN |
| cg26925644 | 0.699   | 0.212   | 0.487     | 2e-12            | PHLDB1                | Hypermethylated in FP vs FN |
| cg15491701 | 0.662   | 0.211   | 0.451     | 2e-12            | NA                    | Hypermethylated in FP vs FN |
| cg19640166 | 0.545   | 0.151   | 0.394     | 2e-12            | NA                    | Hypermethylated in FP vs FN |
| cg17056676 | 0.679   | 0.274   | 0.405     | 2e-12            | NA                    | Hypermethylated in FP vs FN |
| cg19971388 | 0.757   | 0.269   | 0.488     | 2e-12            | NA                    | Hypermethylated in FP vs FN |
| cg15425427 | 0.581   | 0.130   | 0.451     | 2e-12            | SIPA1                 | Hypermethylated in FP vs FN |
| cg09983326 | 0.573   | 0.098   | 0.475     | 2e-12            | NA                    | Hypermethylated in FP vs FN |
| cg14694342 | 0.622   | 0.105   | 0.517     | 2e-12            | NA                    | Hypermethylated in FP vs FN |
| cg02962597 | 0.804   | 0.347   | 0.457     | 2e-12            | NOS1                  | Hypermethylated in FP vs FN |
| cg12829141 | 0.604   | 0.115   | 0.489     | 2e-12            | NA                    | Hypermethylated in FP vs FN |
| cg22326353 | 0.539   | 0.092   | 0.447     | 2e-12            | MIF4GD                | Hypermethylated in FP vs FN |

### Supplementary Table 7 (continued)

| Probe      | FP.mean | FN.mean | Mean.diff | Adjusted.P.value | Promoter.related.gene | Category                    |
|------------|---------|---------|-----------|------------------|-----------------------|-----------------------------|
| cg19424261 | 0.591   | 0.256   | 0.335     | 3e-12            | NA                    | Hypermethylated in FP vs FN |
| cg14423045 | 0.805   | 0.482   | 0.323     | 3e-12            | NA                    | Hypermethylated in FP vs FN |
| cg02119091 | 0.770   | 0.260   | 0.510     | 3e-12            | NA                    | Hypermethylated in FP vs FN |
| cg04287574 | 0.790   | 0.237   | 0.553     | 3e-12            | NA                    | Hypermethylated in FP vs FN |
| cg10451078 | 0.810   | 0.170   | 0.640     | 3e-12            | GATA4                 | Hypermethylated in FP vs FN |
| cg21460582 | 0.801   | 0.500   | 0.301     | 3e-12            | CSPG4                 | Hypermethylated in FP vs FN |
| cg15148513 | 0.839   | 0.476   | 0.363     | 3e-12            | NA                    | Hypermethylated in FP vs FN |
| cg17327331 | 0.822   | 0.406   | 0.416     | 3e-12            | NA                    | Hypermethylated in FP vs FN |
| cg24361048 | 0.808   | 0.506   | 0.303     | 3e-12            | NA                    | Hypermethylated in FP vs FN |
| cg00277753 | 0.894   | 0.457   | 0.437     | 3e-12            | NA                    | Hypermethylated in FP vs FN |
| cg16546703 | 0.587   | 0.172   | 0.415     | 3e-12            | ARSI                  | Hypermethylated in FP vs FN |
| cg17962547 | 0.865   | 0.517   | 0.348     | 3e-12            | NA                    | Hypermethylated in FP vs FN |
| cg14227460 | 0.627   | 0.252   | 0.375     | 3e-12            | PLIN4                 | Hypermethylated in FP vs FN |
| cg05224498 | 0.804   | 0.499   | 0.305     | 3e-12            | NA                    | Hypermethylated in FP vs FN |
| cg05483776 | 0.854   | 0.390   | 0.464     | 3e-12            | NA                    | Hypermethylated in FP vs FN |
| cg13557167 | 0.832   | 0.498   | 0.334     | 4e-12            | NA                    | Hypermethylated in FP vs FN |
| cg11448683 | 0.688   | 0.225   | 0.463     | 4e-12            | TCTEX1D4_BTBD19       | Hypermethylated in FP vs FN |
| cg12092201 | 0.633   | 0.099   | 0.534     | 4e-12            | NA                    | Hypermethylated in FP vs FN |
| cg16112129 | 0.702   | 0.179   | 0.524     | 4e-12            | DRD1                  | Hypermethylated in FP vs FN |
| cg02061967 | 0.696   | 0.234   | 0.462     | 4e-12            | NA                    | Hypermethylated in FP vs FN |
| cg24253904 | 0.693   | 0.390   | 0.303     | 4e-12            | NA                    | Hypermethylated in FP vs FN |
| cg09671258 | 0.701   | 0.062   | 0.639     | 4e-12            | NA                    | Hypermethylated in FP vs FN |
| cg09693811 | 0.485   | 0.168   | 0.317     | 4e-12            | NA                    | Hypermethylated in FP vs FN |
| cg01296593 | 0.590   | 0.155   | 0.435     | 5e-12            | FOXC2                 | Hypermethylated in FP vs FN |
| cg08539872 | 0.723   | 0.169   | 0.554     | 5e-12            | NA                    | Hypermethylated in FP vs FN |

### Supplementary Table 7 (continued)

| Probe      | FP.mean | FN.mean | Mean.diff | Adjusted.P.value | Promoter.related.gene | Category                    |
|------------|---------|---------|-----------|------------------|-----------------------|-----------------------------|
| cg14323199 | 0.535   | 0.116   | 0.419     | 5e-12            | NA                    | Hypermethylated in FP vs FN |
| cg16876647 | 0.709   | 0.113   | 0.596     | 5e-12            | NA                    | Hypermethylated in FP vs FN |
| cg13583088 | 0.723   | 0.319   | 0.404     | 6e-12            | NA                    | Hypermethylated in FP vs FN |
| cg04410777 | 0.579   | 0.088   | 0.491     | 6e-12            | SEMA6B                | Hypermethylated in FP vs FN |
| cg04233840 | 0.818   | 0.215   | 0.602     | 6e-12            | GATA4                 | Hypermethylated in FP vs FN |
| cg22086566 | 0.810   | 0.292   | 0.518     | 6e-12            | NA                    | Hypermethylated in FP vs FN |
| cg24304789 | 0.602   | 0.099   | 0.502     | 6e-12            | NA                    | Hypermethylated in FP vs FN |
| cg25369553 | 0.777   | 0.398   | 0.379     | 7e-12            | NA                    | Hypermethylated in FP vs FN |
| cg02971253 | 0.602   | 0.229   | 0.372     | 7e-12            | NA                    | Hypermethylated in FP vs FN |
| cg12064373 | 0.640   | 0.179   | 0.461     | 7e-12            | NA                    | Hypermethylated in FP vs FN |
| cg16766632 | 0.786   | 0.336   | 0.450     | 7e-12            | NA                    | Hypermethylated in FP vs FN |
| cg00118317 | 0.523   | 0.147   | 0.375     | 7e-12            | NA                    | Hypermethylated in FP vs FN |
| cg03116124 | 0.700   | 0.297   | 0.403     | 7e-12            | NA                    | Hypermethylated in FP vs FN |
| cg04601228 | 0.881   | 0.369   | 0.512     | 7e-12            | NA                    | Hypermethylated in FP vs FN |
| cg01949455 | 0.677   | 0.211   | 0.465     | 7e-12            | NA                    | Hypermethylated in FP vs FN |
| cg07568313 | 0.828   | 0.497   | 0.331     | 8e-12            | NA                    | Hypermethylated in FP vs FN |
| cg07090980 | 0.861   | 0.487   | 0.374     | 8e-12            | NA                    | Hypermethylated in FP vs FN |
| cg04242078 | 0.622   | 0.239   | 0.383     | 9e-12            | NA                    | Hypermethylated in FP vs FN |
| cg07937631 | 0.721   | 0.284   | 0.437     | 9e-12            | NA                    | Hypermethylated in FP vs FN |
| cg12564012 | 0.783   | 0.280   | 0.503     | 9e-12            | NA                    | Hypermethylated in FP vs FN |
| cg02546607 | 0.686   | 0.277   | 0.409     | 9e-12            | NA                    | Hypermethylated in FP vs FN |
| cg18442286 | 0.737   | 0.172   | 0.565     | 9e-12            | NA                    | Hypermethylated in FP vs FN |
| cg02502679 | 0.835   | 0.443   | 0.392     | 9e-12            | NA                    | Hypermethylated in FP vs FN |
| cg00296038 | 0.750   | 0.395   | 0.356     | 9e-12            | VGLL4                 | Hypermethylated in FP vs FN |
| cg13058457 | 0.747   | 0.352   | 0.394     | 9e-12            | NA                    | Hypermethylated in FP vs FN |

### Supplementary Table 7 (continued)

| Probe      | FP.mean | FN.mean | Mean.diff | Adjusted.P.value | Promoter.related.gene | Category                    |
|------------|---------|---------|-----------|------------------|-----------------------|-----------------------------|
| cg22222461 | 0.699   | 0.282   | 0.417     | 1e-11            | NA                    | Hypermethylated in FP vs FN |
| cg04509074 | 0.584   | 0.138   | 0.446     | 1e-11            | NA                    | Hypermethylated in FP vs FN |
| cg19848599 | 0.789   | 0.343   | 0.446     | 1e-11            | NA                    | Hypermethylated in FP vs FN |
| cg20458044 | 0.641   | 0.352   | 0.289     | 1e-11            | NA                    | Hypermethylated in FP vs FN |
| cg15285436 | 0.788   | 0.380   | 0.409     | 1e-11            | NA                    | Hypermethylated in FP vs FN |
| cg13305415 | 0.645   | 0.227   | 0.417     | 1e-11            | NA                    | Hypermethylated in FP vs FN |
| cg15302379 | 0.788   | 0.314   | 0.474     | 1e-11            | KAZALD1               | Hypermethylated in FP vs FN |
| cg11650135 | 0.800   | 0.420   | 0.380     | 1e-11            | NA                    | Hypermethylated in FP vs FN |
| cg14920846 | 0.751   | 0.249   | 0.502     | 1e-11            | NAV1                  | Hypermethylated in FP vs FN |
| cg23096689 | 0.742   | 0.323   | 0.420     | 1e-11            | FOXC2                 | Hypermethylated in FP vs FN |
| cg13663738 | 0.609   | 0.145   | 0.464     | 1e-11            | NA                    | Hypermethylated in FP vs FN |
| cg14989164 | 0.549   | 0.124   | 0.425     | 1e-11            | NA                    | Hypermethylated in FP vs FN |
| cg03441452 | 0.870   | 0.374   | 0.495     | 1e-11            | NA                    | Hypermethylated in FP vs FN |
| cg10914558 | 0.673   | 0.239   | 0.435     | 1e-11            | NA                    | Hypermethylated in FP vs FN |
| cg27258696 | 0.845   | 0.390   | 0.455     | 1e-11            | NA                    | Hypermethylated in FP vs FN |
| cg21227848 | 0.753   | 0.208   | 0.544     | 1e-11            | NA                    | Hypermethylated in FP vs FN |
| cg10135197 | 0.495   | 0.156   | 0.340     | 1e-11            | NA                    | Hypermethylated in FP vs FN |
| cg19793499 | 0.845   | 0.373   | 0.473     | 1e-11            | NA                    | Hypermethylated in FP vs FN |
| cg00784105 | 0.776   | 0.455   | 0.321     | 1e-11            | NA                    | Hypermethylated in FP vs FN |
| cg08107354 | 0.878   | 0.505   | 0.374     | 1e-11            | NA                    | Hypermethylated in FP vs FN |
| cg17515024 | 0.533   | 0.155   | 0.378     | 1e-11            | HIST3H2BB             | Hypermethylated in FP vs FN |
| cg05515072 | 0.518   | 0.199   | 0.319     | 1e-11            | NA                    | Hypermethylated in FP vs FN |
| cg14524643 | 0.568   | 0.304   | 0.263     | 2e-11            | NA                    | Hypermethylated in FP vs FN |
| cg20851030 | 0.876   | 0.369   | 0.507     | 2e-11            | NA                    | Hypermethylated in FP vs FN |
| cg07409629 | 0.829   | 0.454   | 0.375     | 2e-11            | NA                    | Hypermethylated in FP vs FN |



### Supplementary Table 7 (continued)

| Probe      | FP.mean | FN.mean | Mean.diff | Adjusted.P.value | Promoter.related.gene | Category                    |
|------------|---------|---------|-----------|------------------|-----------------------|-----------------------------|
| cg14236413 | 0.827   | 0.416   | 0.411     | 2e-11            | NA                    | Hypermethylated in FP vs FN |
| cg04843968 | 0.851   | 0.510   | 0.340     | 2e-11            | NA                    | Hypermethylated in FP vs FN |
| cg07123579 | 0.801   | 0.512   | 0.289     | 2e-11            | NA                    | Hypermethylated in FP vs FN |
| cg13298538 | 0.704   | 0.361   | 0.343     | 2e-11            | NA                    | Hypermethylated in FP vs FN |
| cg02595280 | 0.822   | 0.261   | 0.561     | 2e-11            | NA                    | Hypermethylated in FP vs FN |
| cg22773334 | 0.656   | 0.347   | 0.309     | 2e-11            | NA                    | Hypermethylated in FP vs FN |
| cg10109635 | 0.887   | 0.522   | 0.365     | 2e-11            | NA                    | Hypermethylated in FP vs FN |
| cg27493151 | 0.765   | 0.279   | 0.487     | 2e-11            | NA                    | Hypermethylated in FP vs FN |
| cg25600933 | 0.741   | 0.251   | 0.490     | 2e-11            | NA                    | Hypermethylated in FP vs FN |
| cg15171154 | 0.748   | 0.271   | 0.477     | 2e-11            | NA                    | Hypermethylated in FP vs FN |
| cg05307803 | 0.646   | 0.248   | 0.398     | 2e-11            | NA                    | Hypermethylated in FP vs FN |
| cg26862316 | 0.796   | 0.355   | 0.442     | 2e-11            | AKT2                  | Hypermethylated in FP vs FN |
| cg01514415 | 0.348   | 0.095   | 0.254     | 2e-11            | NA                    | Hypermethylated in FP vs FN |
| cg19399165 | 0.692   | 0.241   | 0.451     | 2e-11            | EMILIN1               | Hypermethylated in FP vs FN |
| cg19892287 | 0.677   | 0.283   | 0.395     | 2e-11            | NA                    | Hypermethylated in FP vs FN |
| cg13713922 | 0.753   | 0.257   | 0.496     | 2e-11            | NA                    | Hypermethylated in FP vs FN |
| cg05573626 | 0.694   | 0.363   | 0.331     | 2e-11            | NA                    | Hypermethylated in FP vs FN |
| cg25339612 | 0.668   | 0.155   | 0.513     | 2e-11            | ENC1                  | Hypermethylated in FP vs FN |
| cg25195968 | 0.726   | 0.326   | 0.400     | 2e-11            | NA                    | Hypermethylated in FP vs FN |
| cg13916835 | 0.763   | 0.285   | 0.478     | 2e-11            | NA                    | Hypermethylated in FP vs FN |
| cg03025825 | 0.848   | 0.425   | 0.423     | 2e-11            | NA                    | Hypermethylated in FP vs FN |
| cg02397205 | 0.865   | 0.404   | 0.461     | 2e-11            | NA                    | Hypermethylated in FP vs FN |
| cg03796321 | 0.702   | 0.172   | 0.530     | 2e-11            | NA                    | Hypermethylated in FP vs FN |
| cg26224624 | 0.847   | 0.450   | 0.397     | 2e-11            | NA                    | Hypermethylated in FP vs FN |
| cg09925747 | 0.438   | 0.161   | 0.276     | 2e-11            | NA                    | Hypermethylated in FP vs FN |

### Supplementary Table 7 (continued)

| Probe      | FP.mean | FN.mean | Mean.diff | Adjusted.P.value | Promoter.related.gene | Category                    |
|------------|---------|---------|-----------|------------------|-----------------------|-----------------------------|
| cg12117141 | 0.697   | 0.169   | 0.528     | 2e-11            | NA                    | Hypermethylated in FP vs FN |
| cg06706550 | 0.798   | 0.344   | 0.454     | 2e-11            | NA                    | Hypermethylated in FP vs FN |
| cg18119192 | 0.812   | 0.260   | 0.552     | 2e-11            | NA                    | Hypermethylated in FP vs FN |
| cg03538436 | 0.745   | 0.200   | 0.545     | 2e-11            | NOS1                  | Hypermethylated in FP vs FN |
| cg10233454 | 0.708   | 0.255   | 0.454     | 3e-11            | NA                    | Hypermethylated in FP vs FN |
| cg23288298 | 0.597   | 0.122   | 0.475     | 3e-11            | NA                    | Hypermethylated in FP vs FN |
| cg07021447 | 0.873   | 0.529   | 0.344     | 3e-11            | NA                    | Hypermethylated in FP vs FN |
| cg26232359 | 0.764   | 0.315   | 0.449     | 3e-11            | NA                    | Hypermethylated in FP vs FN |
| cg02153814 | 0.649   | 0.338   | 0.311     | 3e-11            | NA                    | Hypermethylated in FP vs FN |
| cg11691504 | 0.822   | 0.422   | 0.400     | 3e-11            | DLGAP2                | Hypermethylated in FP vs FN |
| cg10453420 | 0.725   | 0.161   | 0.564     | 3e-11            | NA                    | Hypermethylated in FP vs FN |
| cg09371620 | 0.789   | 0.390   | 0.399     | 3e-11            | NA                    | Hypermethylated in FP vs FN |
| cg06290096 | 0.738   | 0.352   | 0.386     | 3e-11            | PHLDB1                | Hypermethylated in FP vs FN |
| cg13709894 | 0.492   | 0.154   | 0.338     | 3e-11            | NA                    | Hypermethylated in FP vs FN |
| cg09375488 | 0.817   | 0.463   | 0.354     | 3e-11            | ASB4                  | Hypermethylated in FP vs FN |
| cg20167126 | 0.518   | 0.139   | 0.379     | 3e-11            | NA                    | Hypermethylated in FP vs FN |
| cg00816182 | 0.483   | 0.163   | 0.321     | 3e-11            | NA                    | Hypermethylated in FP vs FN |
| cg16735682 | 0.374   | 0.089   | 0.285     | 3e-11            | ELN                   | Hypermethylated in FP vs FN |
| cg03434029 | 0.709   | 0.268   | 0.441     | 4e-11            | TCTEX1D4_BTBD19       | Hypermethylated in FP vs FN |
| cg14665813 | 0.739   | 0.157   | 0.583     | 4e-11            | NA                    | Hypermethylated in FP vs FN |
| cg07362569 | 0.391   | 0.106   | 0.285     | 4e-11            | SMARCD2               | Hypermethylated in FP vs FN |
| cg21329649 | 0.824   | 0.448   | 0.376     | 4e-11            | NA                    | Hypermethylated in FP vs FN |
| cg00882235 | 0.674   | 0.153   | 0.521     | 4e-11            | NA                    | Hypermethylated in FP vs FN |
| cg05930881 | 0.832   | 0.188   | 0.644     | 4e-11            | GATA4                 | Hypermethylated in FP vs FN |
| cg18063017 | 0.687   | 0.209   | 0.477     | 4e-11            | NA                    | Hypermethylated in FP vs FN |

### Supplementary Table 7 (continued)

| Probe      | FP.mean | FN.mean | Mean.diff | Adjusted.P.value | Promoter.related.gene | Category                    |
|------------|---------|---------|-----------|------------------|-----------------------|-----------------------------|
| cg02323633 | 0.607   | 0.128   | 0.479     | 4e-11            | ENC1                  | Hypermethylated in FP vs FN |
| cg08883485 | 0.730   | 0.303   | 0.427     | 4e-11            | NA                    | Hypermethylated in FP vs FN |
| cg06412358 | 0.588   | 0.092   | 0.496     | 4e-11            | NA                    | Hypermethylated in FP vs FN |
| cg12732998 | 0.772   | 0.227   | 0.545     | 4e-11            | NA                    | Hypermethylated in FP vs FN |
| cg26310429 | 0.944   | 0.610   | 0.335     | 4e-11            | NA                    | Hypermethylated in FP vs FN |
| cg11290182 | 0.795   | 0.309   | 0.486     | 5e-11            | NA                    | Hypermethylated in FP vs FN |
| cg20591120 | 0.787   | 0.385   | 0.402     | 5e-11            | NA                    | Hypermethylated in FP vs FN |
| cg09249494 | 0.580   | 0.210   | 0.370     | 5e-11            | LY86                  | Hypermethylated in FP vs FN |
| cg07911361 | 0.635   | 0.238   | 0.396     | 5e-11            | NA                    | Hypermethylated in FP vs FN |
| cg06629713 | 0.833   | 0.531   | 0.301     | 5e-11            | NA                    | Hypermethylated in FP vs FN |
| cg08408994 | 0.649   | 0.077   | 0.571     | 5e-11            | NA                    | Hypermethylated in FP vs FN |
| cg16732616 | 0.578   | 0.055   | 0.524     | 5e-11            | NA                    | Hypermethylated in FP vs FN |
| cg21680719 | 0.780   | 0.340   | 0.441     | 5e-11            | NA                    | Hypermethylated in FP vs FN |
| cg05638500 | 0.840   | 0.521   | 0.318     | 5e-11            | NA                    | Hypermethylated in FP vs FN |
| cg25271479 | 0.512   | 0.127   | 0.386     | 5e-11            | NA                    | Hypermethylated in FP vs FN |
| cg22076676 | 0.687   | 0.377   | 0.310     | 5e-11            | NA                    | Hypermethylated in FP vs FN |
| cg25227364 | 0.771   | 0.324   | 0.448     | 5e-11            | NA                    | Hypermethylated in FP vs FN |
| cg17139085 | 0.751   | 0.339   | 0.412     | 5e-11            | NA                    | Hypermethylated in FP vs FN |
| cg17898124 | 0.823   | 0.398   | 0.425     | 5e-11            | NA                    | Hypermethylated in FP vs FN |
| cg08095452 | 0.778   | 0.301   | 0.478     | 5e-11            | NA                    | Hypermethylated in FP vs FN |
| cg00244267 | 0.629   | 0.281   | 0.348     | 5e-11            | SEMA6B                | Hypermethylated in FP vs FN |
| cg19332409 | 0.823   | 0.357   | 0.466     | 6e-11            | NA                    | Hypermethylated in FP vs FN |
| cg26319579 | 0.411   | 0.112   | 0.300     | 6e-11            | TEAD3                 | Hypermethylated in FP vs FN |
| cg07487572 | 0.820   | 0.353   | 0.467     | 6e-11            | NA                    | Hypermethylated in FP vs FN |
| cg26410483 | 0.619   | 0.104   | 0.515     | 6e-11            | NA                    | Hypermethylated in FP vs FN |

### Supplementary Table 7 (continued)

| Probe      | FP.mean | FN.mean | Mean.diff | Adjusted.P.value | Promoter.related.gene | Category                    |
|------------|---------|---------|-----------|------------------|-----------------------|-----------------------------|
| cg20886049 | 0.782   | 0.430   | 0.351     | 6e-11            | TSKU                  | Hypermethylated in FP vs FN |
| cg20708135 | 0.757   | 0.350   | 0.407     | 6e-11            | TSKU                  | Hypermethylated in FP vs FN |
| cg20779414 | 0.356   | 0.094   | 0.262     | 6e-11            | STAT6                 | Hypermethylated in FP vs FN |
| cg04179952 | 0.728   | 0.226   | 0.503     | 6e-11            | NA                    | Hypermethylated in FP vs FN |
| cg21680729 | 0.816   | 0.544   | 0.272     | 6e-11            | NA                    | Hypermethylated in FP vs FN |
| cg00808555 | 0.614   | 0.257   | 0.358     | 7e-11            | ARL5C                 | Hypermethylated in FP vs FN |
| cg13964068 | 0.577   | 0.215   | 0.362     | 7e-11            | NA                    | Hypermethylated in FP vs FN |
| cg20912752 | 0.838   | 0.377   | 0.461     | 7e-11            | NA                    | Hypermethylated in FP vs FN |
| cg20118431 | 0.786   | 0.374   | 0.412     | 7e-11            | NA                    | Hypermethylated in FP vs FN |
| cg08106887 | 0.735   | 0.224   | 0.511     | 7e-11            | NA                    | Hypermethylated in FP vs FN |
| cg05186311 | 0.573   | 0.137   | 0.436     | 7e-11            | NA                    | Hypermethylated in FP vs FN |
| cg18123948 | 0.789   | 0.244   | 0.545     | 7e-11            | GATA4                 | Hypermethylated in FP vs FN |
| cg07067993 | 0.750   | 0.257   | 0.493     | 7e-11            | NA                    | Hypermethylated in FP vs FN |
| cg10589235 | 0.801   | 0.293   | 0.508     | 7e-11            | NA                    | Hypermethylated in FP vs FN |
| cg01185921 | 0.672   | 0.254   | 0.418     | 7e-11            | ABLIM1                | Hypermethylated in FP vs FN |
| cg07080050 | 0.756   | 0.241   | 0.515     | 7e-11            | NA                    | Hypermethylated in FP vs FN |
| cg18118490 | 0.418   | 0.117   | 0.302     | 7e-11            | NA                    | Hypermethylated in FP vs FN |
| cg25746778 | 0.724   | 0.201   | 0.523     | 7e-11            | NA                    | Hypermethylated in FP vs FN |
| cg20460153 | 0.867   | 0.571   | 0.297     | 8e-11            | NA                    | Hypermethylated in FP vs FN |
| cg17896927 | 0.595   | 0.187   | 0.408     | 8e-11            | RGMA                  | Hypermethylated in FP vs FN |
| cg04423214 | 0.863   | 0.481   | 0.382     | 8e-11            | NA                    | Hypermethylated in FP vs FN |
| cg10256255 | 0.855   | 0.528   | 0.327     | 8e-11            | NA                    | Hypermethylated in FP vs FN |
| cg05113840 | 0.570   | 0.150   | 0.420     | 8e-11            | NA                    | Hypermethylated in FP vs FN |
| cg08890418 | 0.578   | 0.059   | 0.519     | 8e-11            | KIF17                 | Hypermethylated in FP vs FN |
| cg17119907 | 0.769   | 0.268   | 0.501     | 8e-11            | NA                    | Hypermethylated in FP vs FN |

### Supplementary Table 7 (continued)

| Probe      | FP.mean | FN.mean | Mean.diff | Adjusted.P.value | Promoter.related.gene | Category                    |
|------------|---------|---------|-----------|------------------|-----------------------|-----------------------------|
| cg00408315 | 0.825   | 0.423   | 0.401     | 8e-11            | NA                    | Hypermethylated in FP vs FN |
| cg27140633 | 0.833   | 0.329   | 0.504     | 8e-11            | NA                    | Hypermethylated in FP vs FN |
| cg16278514 | 0.702   | 0.339   | 0.363     | 8e-11            | NA                    | Hypermethylated in FP vs FN |
| cg21642054 | 0.784   | 0.458   | 0.326     | 8e-11            | NA                    | Hypermethylated in FP vs FN |
| cg21316772 | 0.655   | 0.320   | 0.335     | 9e-11            | B4GALT1               | Hypermethylated in FP vs FN |
| cg20285745 | 0.648   | 0.324   | 0.324     | 9e-11            | NA                    | Hypermethylated in FP vs FN |
| cg00737841 | 0.788   | 0.306   | 0.482     | 9e-11            | NA                    | Hypermethylated in FP vs FN |
| cg14606082 | 0.794   | 0.423   | 0.371     | 9e-11            | LFNG                  | Hypermethylated in FP vs FN |
| cg08302885 | 0.707   | 0.280   | 0.427     | 9e-11            | NA                    | Hypermethylated in FP vs FN |
| cg05548130 | 0.798   | 0.426   | 0.372     | 9e-11            | NA                    | Hypermethylated in FP vs FN |
| cg23250528 | 0.835   | 0.468   | 0.367     | 9e-11            | NA                    | Hypermethylated in FP vs FN |
| cg03625953 | 0.773   | 0.293   | 0.480     | 9e-11            | NA                    | Hypermethylated in FP vs FN |
| cg02905426 | 0.791   | 0.323   | 0.468     | 1e-10            | FAM76A                | Hypermethylated in FP vs FN |
| cg14362630 | 0.651   | 0.137   | 0.515     | 1e-10            | NA                    | Hypermethylated in FP vs FN |
| cg21074656 | 0.641   | 0.257   | 0.384     | 1e-10            | NA                    | Hypermethylated in FP vs FN |
| cg19604496 | 0.807   | 0.332   | 0.475     | 1e-10            | NA                    | Hypermethylated in FP vs FN |
| cg10187692 | 0.560   | 0.242   | 0.318     | 1e-10            | NA                    | Hypermethylated in FP vs FN |
| cg03024537 | 0.723   | 0.283   | 0.440     | 1e-10            | NA                    | Hypermethylated in FP vs FN |
| cg17827020 | 0.578   | 0.110   | 0.469     | 1e-10            | NA                    | Hypermethylated in FP vs FN |
| cg07060913 | 0.675   | 0.204   | 0.471     | 1e-10            | NA                    | Hypermethylated in FP vs FN |
| cg09353705 | 0.546   | 0.159   | 0.387     | 1e-10            | NA                    | Hypermethylated in FP vs FN |
| cg05797224 | 0.884   | 0.495   | 0.389     | 1e-10            | NA                    | Hypermethylated in FP vs FN |
| cg25372085 | 0.691   | 0.390   | 0.301     | 1e-10            | NA                    | Hypermethylated in FP vs FN |
| cg25122233 | 0.762   | 0.227   | 0.534     | 1e-10            | NA                    | Hypermethylated in FP vs FN |
| cg23251296 | 0.796   | 0.420   | 0.376     | 1e-10            | CD79B                 | Hypermethylated in FP vs FN |

**Supplementary Table 7 (continued)**

| Probe      | FP.mean | FN.mean | Mean.diff | Adjusted.P.value | Promoter.related.gene | Category                    |
|------------|---------|---------|-----------|------------------|-----------------------|-----------------------------|
| cg16710604 | 0.726   | 0.310   | 0.416     | 1e-10            | NA                    | Hypermethylated in FP vs FN |
| cg27199976 | 0.711   | 0.281   | 0.429     | 1e-10            | NA                    | Hypermethylated in FP vs FN |
| cg13166213 | 0.780   | 0.248   | 0.532     | 1e-10            | GATA4                 | Hypermethylated in FP vs FN |
| cg15186616 | 0.795   | 0.453   | 0.342     | 1e-10            | DLGAP2                | Hypermethylated in FP vs FN |
| cg05053979 | 0.813   | 0.475   | 0.338     | 1e-10            | NA                    | Hypermethylated in FP vs FN |
| cg00911881 | 0.801   | 0.351   | 0.450     | 1e-10            | NA                    | Hypermethylated in FP vs FN |
| cg02097014 | 0.539   | 0.287   | 0.252     | 1e-10            | CHI3L1                | Hypermethylated in FP vs FN |
| cg19615174 | 0.591   | 0.113   | 0.478     | 1e-10            | SEMA6B                | Hypermethylated in FP vs FN |
| cg14227785 | 0.833   | 0.409   | 0.424     | 1e-10            | NA                    | Hypermethylated in FP vs FN |
| cg12999366 | 0.711   | 0.281   | 0.429     | 1e-10            | NA                    | Hypermethylated in FP vs FN |
| cg26225694 | 0.475   | 0.055   | 0.420     | 1e-10            | NA                    | Hypermethylated in FP vs FN |
| cg25265234 | 0.774   | 0.510   | 0.264     | 2e-10            | NA                    | Hypermethylated in FP vs FN |
| cg10590925 | 0.724   | 0.240   | 0.484     | 2e-10            | NA                    | Hypermethylated in FP vs FN |
| cg05315620 | 0.866   | 0.551   | 0.315     | 2e-10            | NA                    | Hypermethylated in FP vs FN |
| cg15241074 | 0.643   | 0.200   | 0.442     | 2e-10            | NA                    | Hypermethylated in FP vs FN |
| cg16708012 | 0.722   | 0.320   | 0.402     | 2e-10            | TMEM119               | Hypermethylated in FP vs FN |
| cg09642857 | 0.766   | 0.311   | 0.455     | 2e-10            | NA                    | Hypermethylated in FP vs FN |
| cg09415955 | 0.637   | 0.347   | 0.291     | 2e-10            | NA                    | Hypermethylated in FP vs FN |
| cg00313914 | 0.684   | 0.211   | 0.473     | 2e-10            | NA                    | Hypermethylated in FP vs FN |
| cg09326079 | 0.810   | 0.422   | 0.388     | 2e-10            | NA                    | Hypermethylated in FP vs FN |
| cg06080831 | 0.687   | 0.185   | 0.502     | 2e-10            | NA                    | Hypermethylated in FP vs FN |
| cg15597364 | 0.640   | 0.172   | 0.469     | 2e-10            | NA                    | Hypermethylated in FP vs FN |
| cg03287111 | 0.700   | 0.202   | 0.498     | 2e-10            | NA                    | Hypermethylated in FP vs FN |
| cg24399395 | 0.466   | 0.052   | 0.414     | 2e-10            | NA                    | Hypermethylated in FP vs FN |
| cg17633234 | 0.603   | 0.212   | 0.391     | 2e-10            | RGMA                  | Hypermethylated in FP vs FN |

### Supplementary Table 7 (continued)

| Probe      | FP.mean | FN.mean | Mean.diff | Adjusted.P.value | Promoter.related.gene | Category                    |
|------------|---------|---------|-----------|------------------|-----------------------|-----------------------------|
| cg15613048 | 0.538   | 0.083   | 0.455     | 2e-10            | KIF17                 | Hypermethylated in FP vs FN |
| cg26311262 | 0.652   | 0.296   | 0.356     | 2e-10            | NA                    | Hypermethylated in FP vs FN |
| cg06680852 | 0.766   | 0.464   | 0.301     | 2e-10            | NA                    | Hypermethylated in FP vs FN |
| cg04963697 | 0.857   | 0.483   | 0.374     | 2e-10            | NA                    | Hypermethylated in FP vs FN |
| cg07507755 | 0.601   | 0.187   | 0.414     | 2e-10            | ATP2C2                | Hypermethylated in FP vs FN |
| cg02038418 | 0.879   | 0.544   | 0.335     | 2e-10            | NA                    | Hypermethylated in FP vs FN |
| cg07139329 | 0.781   | 0.275   | 0.506     | 2e-10            | NAV1                  | Hypermethylated in FP vs FN |
| cg04438661 | 0.871   | 0.457   | 0.414     | 2e-10            | NA                    | Hypermethylated in FP vs FN |
| cg06707081 | 0.746   | 0.265   | 0.481     | 2e-10            | GATA4                 | Hypermethylated in FP vs FN |
| cg10342899 | 0.435   | 0.153   | 0.282     | 2e-10            | NA                    | Hypermethylated in FP vs FN |
| cg12560421 | 0.783   | 0.459   | 0.323     | 2e-10            | NA                    | Hypermethylated in FP vs FN |
| cg27480444 | 0.826   | 0.445   | 0.382     | 2e-10            | NA                    | Hypermethylated in FP vs FN |
| cg18091083 | 0.831   | 0.425   | 0.407     | 2e-10            | NA                    | Hypermethylated in FP vs FN |
| cg17475271 | 0.774   | 0.373   | 0.401     | 2e-10            | NA                    | Hypermethylated in FP vs FN |
| cg05237485 | 0.808   | 0.260   | 0.548     | 2e-10            | NA                    | Hypermethylated in FP vs FN |
| cg16326073 | 0.768   | 0.431   | 0.337     | 2e-10            | NA                    | Hypermethylated in FP vs FN |
| cg26035892 | 0.777   | 0.449   | 0.328     | 2e-10            | NA                    | Hypermethylated in FP vs FN |
| cg21606696 | 0.777   | 0.501   | 0.276     | 2e-10            | NA                    | Hypermethylated in FP vs FN |
| cg17745097 | 0.697   | 0.273   | 0.424     | 2e-10            | NA                    | Hypermethylated in FP vs FN |
| cg04508114 | 0.793   | 0.422   | 0.370     | 2e-10            | ABLIM1                | Hypermethylated in FP vs FN |
| cg13726184 | 0.762   | 0.386   | 0.376     | 2e-10            | NA                    | Hypermethylated in FP vs FN |
| cg03217729 | 0.688   | 0.315   | 0.373     | 2e-10            | NA                    | Hypermethylated in FP vs FN |
| cg05318186 | 0.617   | 0.282   | 0.335     | 2e-10            | NA                    | Hypermethylated in FP vs FN |
| cg00573770 | 0.647   | 0.307   | 0.340     | 2e-10            | ZEB2                  | Hypermethylated in FP vs FN |
| cg11981599 | 0.791   | 0.301   | 0.491     | 3e-10            | NA                    | Hypermethylated in FP vs FN |

### Supplementary Table 7 (continued)

| Probe      | FP.mean | FN.mean | Mean.diff | Adjusted.P.value | Promoter.related.gene | Category                    |
|------------|---------|---------|-----------|------------------|-----------------------|-----------------------------|
| cg13496979 | 0.645   | 0.078   | 0.566     | 3e-10            | NA                    | Hypermethylated in FP vs FN |
| cg15895197 | 0.589   | 0.228   | 0.361     | 3e-10            | EMILIN1               | Hypermethylated in FP vs FN |
| cg24212268 | 0.700   | 0.334   | 0.366     | 3e-10            | NA                    | Hypermethylated in FP vs FN |
| cg19536781 | 0.813   | 0.440   | 0.374     | 3e-10            | NA                    | Hypermethylated in FP vs FN |
| cg04984852 | 0.827   | 0.369   | 0.458     | 3e-10            | NA                    | Hypermethylated in FP vs FN |
| cg24317122 | 0.818   | 0.390   | 0.428     | 3e-10            | NA                    | Hypermethylated in FP vs FN |
| cg11721177 | 0.607   | 0.193   | 0.414     | 3e-10            | NA                    | Hypermethylated in FP vs FN |
| cg14240060 | 0.781   | 0.319   | 0.462     | 3e-10            | NA                    | Hypermethylated in FP vs FN |
| cg00177797 | 0.697   | 0.165   | 0.532     | 3e-10            | NA                    | Hypermethylated in FP vs FN |
| cg20741105 | 0.748   | 0.304   | 0.444     | 3e-10            | NA                    | Hypermethylated in FP vs FN |
| cg19823138 | 0.691   | 0.323   | 0.368     | 3e-10            | NA                    | Hypermethylated in FP vs FN |
| cg06707765 | 0.814   | 0.443   | 0.371     | 3e-10            | NA                    | Hypermethylated in FP vs FN |
| cg19662708 | 0.812   | 0.473   | 0.339     | 3e-10            | NA                    | Hypermethylated in FP vs FN |
| cg01468426 | 0.800   | 0.408   | 0.393     | 3e-10            | NA                    | Hypermethylated in FP vs FN |
| cg22212839 | 0.817   | 0.444   | 0.374     | 3e-10            | NA                    | Hypermethylated in FP vs FN |
| cg15112747 | 0.693   | 0.336   | 0.356     | 3e-10            | NA                    | Hypermethylated in FP vs FN |
| cg11469540 | 0.600   | 0.187   | 0.413     | 3e-10            | NA                    | Hypermethylated in FP vs FN |
| cg25191628 | 0.558   | 0.085   | 0.473     | 3e-10            | NA                    | Hypermethylated in FP vs FN |
| cg05939993 | 0.841   | 0.516   | 0.325     | 3e-10            | PROP1                 | Hypermethylated in FP vs FN |
| cg15480336 | 0.739   | 0.438   | 0.301     | 3e-10            | ISLR                  | Hypermethylated in FP vs FN |
| cg15005962 | 0.712   | 0.375   | 0.337     | 3e-10            | NA                    | Hypermethylated in FP vs FN |
| cg24964215 | 0.713   | 0.309   | 0.404     | 3e-10            | NA                    | Hypermethylated in FP vs FN |
| cg18834729 | 0.777   | 0.285   | 0.492     | 3e-10            | NA                    | Hypermethylated in FP vs FN |
| cg00129811 | 0.583   | 0.219   | 0.364     | 3e-10            | NA                    | Hypermethylated in FP vs FN |
| cg13177873 | 0.554   | 0.206   | 0.348     | 3e-10            | NA                    | Hypermethylated in FP vs FN |



### Supplementary Table 7 (continued)

| Probe      | FP.mean | FN.mean | Mean.diff | Adjusted.P.value | Promoter.related.gene | Category                    |
|------------|---------|---------|-----------|------------------|-----------------------|-----------------------------|
| cg16622061 | 0.623   | 0.256   | 0.367     | 3e-10            | NA                    | Hypermethylated in FP vs FN |
| cg14044785 | 0.631   | 0.301   | 0.330     | 3e-10            | NA                    | Hypermethylated in FP vs FN |
| cg26427896 | 0.749   | 0.421   | 0.329     | 3e-10            | NA                    | Hypermethylated in FP vs FN |
| cg20279283 | 0.757   | 0.334   | 0.422     | 3e-10            | NA                    | Hypermethylated in FP vs FN |
| cg25816127 | 0.470   | 0.147   | 0.324     | 3e-10            | NA                    | Hypermethylated in FP vs FN |
| cg13165758 | 0.575   | 0.162   | 0.413     | 3e-10            | NA                    | Hypermethylated in FP vs FN |
| cg01691710 | 0.481   | 0.173   | 0.308     | 3e-10            | NA                    | Hypermethylated in FP vs FN |
| cg10021749 | 0.748   | 0.299   | 0.449     | 3e-10            | LFNG                  | Hypermethylated in FP vs FN |
| cg26325912 | 0.728   | 0.363   | 0.365     | 3e-10            | NA                    | Hypermethylated in FP vs FN |
| cg23271501 | 0.796   | 0.511   | 0.284     | 3e-10            | NA                    | Hypermethylated in FP vs FN |
| cg02220418 | 0.813   | 0.336   | 0.477     | 3e-10            | NA                    | Hypermethylated in FP vs FN |
| cg13276704 | 0.645   | 0.226   | 0.419     | 3e-10            | NA                    | Hypermethylated in FP vs FN |
| cg11778001 | 0.459   | 0.146   | 0.313     | 4e-10            | NAB1                  | Hypermethylated in FP vs FN |
| cg19914919 | 0.573   | 0.230   | 0.344     | 4e-10            | TANK                  | Hypermethylated in FP vs FN |
| cg11182965 | 0.764   | 0.506   | 0.258     | 4e-10            | NA                    | Hypermethylated in FP vs FN |
| cg06423949 | 0.849   | 0.417   | 0.433     | 4e-10            | NA                    | Hypermethylated in FP vs FN |
| cg18610302 | 0.808   | 0.483   | 0.325     | 4e-10            | NA                    | Hypermethylated in FP vs FN |
| cg04555379 | 0.903   | 0.609   | 0.294     | 4e-10            | NA                    | Hypermethylated in FP vs FN |
| cg23217153 | 0.606   | 0.263   | 0.343     | 4e-10            | NA                    | Hypermethylated in FP vs FN |
| cg01883046 | 0.771   | 0.288   | 0.482     | 4e-10            | NA                    | Hypermethylated in FP vs FN |
| cg03400139 | 0.849   | 0.474   | 0.375     | 4e-10            | NA                    | Hypermethylated in FP vs FN |
| cg23598080 | 0.652   | 0.141   | 0.512     | 4e-10            | NA                    | Hypermethylated in FP vs FN |
| cg15606654 | 0.831   | 0.485   | 0.346     | 4e-10            | NA                    | Hypermethylated in FP vs FN |
| cg01605435 | 0.755   | 0.338   | 0.417     | 4e-10            | NA                    | Hypermethylated in FP vs FN |
| cg16304215 | 0.705   | 0.165   | 0.539     | 4e-10            | NA                    | Hypermethylated in FP vs FN |

### Supplementary Table 7 (continued)

| Probe      | FP.mean | FN.mean | Mean.diff | Adjusted.P.value | Promoter.related.gene | Category                    |
|------------|---------|---------|-----------|------------------|-----------------------|-----------------------------|
| cg16423375 | 0.605   | 0.159   | 0.446     | 4e-10            | NA                    | Hypermethylated in FP vs FN |
| cg22333888 | 0.537   | 0.259   | 0.278     | 4e-10            | ADAM33                | Hypermethylated in FP vs FN |
| cg13573036 | 0.635   | 0.234   | 0.400     | 4e-10            | NA                    | Hypermethylated in FP vs FN |
| cg26695387 | 0.556   | 0.185   | 0.371     | 4e-10            | NA                    | Hypermethylated in FP vs FN |
| cg01109734 | 0.801   | 0.329   | 0.472     | 4e-10            | NA                    | Hypermethylated in FP vs FN |
| cg02115911 | 0.804   | 0.335   | 0.469     | 4e-10            | NA                    | Hypermethylated in FP vs FN |
| cg01546563 | 0.808   | 0.308   | 0.500     | 4e-10            | NA                    | Hypermethylated in FP vs FN |
| cg14288483 | 0.741   | 0.312   | 0.429     | 4e-10            | NA                    | Hypermethylated in FP vs FN |
| cg08974450 | 0.521   | 0.084   | 0.437     | 4e-10            | ATP2C2                | Hypermethylated in FP vs FN |
| cg17929859 | 0.772   | 0.417   | 0.355     | 4e-10            | NA                    | Hypermethylated in FP vs FN |
| cg18657988 | 0.799   | 0.475   | 0.324     | 4e-10            | NA                    | Hypermethylated in FP vs FN |
| cg02343467 | 0.877   | 0.613   | 0.264     | 4e-10            | NA                    | Hypermethylated in FP vs FN |
| cg14665901 | 0.723   | 0.309   | 0.414     | 4e-10            | NA                    | Hypermethylated in FP vs FN |
| cg22042833 | 0.539   | 0.134   | 0.405     | 4e-10            | NA                    | Hypermethylated in FP vs FN |
| cg15343224 | 0.850   | 0.434   | 0.416     | 4e-10            | NA                    | Hypermethylated in FP vs FN |
| cg09793172 | 0.513   | 0.100   | 0.412     | 4e-10            | KIF17                 | Hypermethylated in FP vs FN |
| cg22139212 | 0.834   | 0.555   | 0.279     | 4e-10            | NA                    | Hypermethylated in FP vs FN |
| cg14168733 | 0.745   | 0.272   | 0.473     | 4e-10            | NAV1                  | Hypermethylated in FP vs FN |
| cg12892471 | 0.740   | 0.442   | 0.298     | 5e-10            | LIMA1                 | Hypermethylated in FP vs FN |
| cg25214187 | 0.713   | 0.236   | 0.477     | 5e-10            | NA                    | Hypermethylated in FP vs FN |
| cg04340651 | 0.707   | 0.270   | 0.437     | 5e-10            | RGMA                  | Hypermethylated in FP vs FN |
| cg08276755 | 0.726   | 0.280   | 0.446     | 5e-10            | NA                    | Hypermethylated in FP vs FN |
| cg24335138 | 0.567   | 0.064   | 0.503     | 5e-10            | NA                    | Hypermethylated in FP vs FN |
| cg11967457 | 0.855   | 0.545   | 0.310     | 5e-10            | LEFTY2                | Hypermethylated in FP vs FN |
| cg12824782 | 0.695   | 0.321   | 0.374     | 5e-10            | NA                    | Hypermethylated in FP vs FN |

### Supplementary Table 7 (continued)

| Probe      | FP.mean | FN.mean | Mean.diff | Adjusted.P.value | Promoter.related.gene | Category                    |
|------------|---------|---------|-----------|------------------|-----------------------|-----------------------------|
| cg25941751 | 0.864   | 0.549   | 0.315     | 5e-10            | NA                    | Hypermethylated in FP vs FN |
| cg23031444 | 0.819   | 0.414   | 0.405     | 5e-10            | NA                    | Hypermethylated in FP vs FN |
| cg04455430 | 0.630   | 0.160   | 0.470     | 5e-10            | NA                    | Hypermethylated in FP vs FN |
| cg17995652 | 0.702   | 0.255   | 0.447     | 5e-10            | NA                    | Hypermethylated in FP vs FN |
| cg26365854 | 0.668   | 0.093   | 0.576     | 5e-10            | NA                    | Hypermethylated in FP vs FN |
| cg22491548 | 0.451   | 0.096   | 0.355     | 5e-10            | NA                    | Hypermethylated in FP vs FN |
| cg01923516 | 0.882   | 0.514   | 0.368     | 5e-10            | NA                    | Hypermethylated in FP vs FN |
| cg23594656 | 0.629   | 0.355   | 0.274     | 5e-10            | NA                    | Hypermethylated in FP vs FN |
| cg22955778 | 0.590   | 0.136   | 0.455     | 5e-10            | NA                    | Hypermethylated in FP vs FN |
| cg00945234 | 0.676   | 0.199   | 0.477     | 6e-10            | NA                    | Hypermethylated in FP vs FN |
| cg19993219 | 0.822   | 0.502   | 0.321     | 6e-10            | NA                    | Hypermethylated in FP vs FN |
| cg04236263 | 0.755   | 0.408   | 0.347     | 6e-10            | NA                    | Hypermethylated in FP vs FN |
| cg06217230 | 0.836   | 0.462   | 0.374     | 6e-10            | NA                    | Hypermethylated in FP vs FN |
| cg15765813 | 0.511   | 0.212   | 0.299     | 6e-10            | NA                    | Hypermethylated in FP vs FN |
| cg18652721 | 0.724   | 0.259   | 0.465     | 6e-10            | NA                    | Hypermethylated in FP vs FN |
| cg18936052 | 0.632   | 0.253   | 0.379     | 6e-10            | FAM76A                | Hypermethylated in FP vs FN |
| cg24811290 | 0.379   | 0.076   | 0.303     | 6e-10            | NA                    | Hypermethylated in FP vs FN |
| cg00595237 | 0.754   | 0.263   | 0.491     | 6e-10            | GATA4                 | Hypermethylated in FP vs FN |
| cg04635021 | 0.843   | 0.515   | 0.328     | 6e-10            | NA                    | Hypermethylated in FP vs FN |
| cg07467854 | 0.795   | 0.459   | 0.336     | 6e-10            | NA                    | Hypermethylated in FP vs FN |
| cg19827875 | 0.815   | 0.316   | 0.500     | 6e-10            | NAV1                  | Hypermethylated in FP vs FN |
| cg00326842 | 0.504   | 0.151   | 0.352     | 6e-10            | NA                    | Hypermethylated in FP vs FN |
| cg25487008 | 0.733   | 0.403   | 0.330     | 6e-10            | NA                    | Hypermethylated in FP vs FN |
| cg15416179 | 0.473   | 0.172   | 0.301     | 6e-10            | NA                    | Hypermethylated in FP vs FN |
| cg12468255 | 0.764   | 0.360   | 0.404     | 6e-10            | NAV1                  | Hypermethylated in FP vs FN |

### Supplementary Table 7 (continued)

| Probe      | FP.mean | FN.mean | Mean.diff | Adjusted.P.value | Promoter.related.gene | Category                    |
|------------|---------|---------|-----------|------------------|-----------------------|-----------------------------|
| cg21546522 | 0.793   | 0.367   | 0.426     | 7e-10            | NA                    | Hypermethylated in FP vs FN |
| cg03106852 | 0.838   | 0.534   | 0.304     | 7e-10            | NA                    | Hypermethylated in FP vs FN |
| cg26759179 | 0.778   | 0.409   | 0.369     | 7e-10            | NA                    | Hypermethylated in FP vs FN |
| cg09711399 | 0.718   | 0.410   | 0.308     | 7e-10            | NA                    | Hypermethylated in FP vs FN |
| cg02187214 | 0.567   | 0.175   | 0.392     | 7e-10            | FOXC2                 | Hypermethylated in FP vs FN |
| cg21546950 | 0.721   | 0.350   | 0.371     | 7e-10            | NA                    | Hypermethylated in FP vs FN |
| cg13490227 | 0.802   | 0.468   | 0.334     | 7e-10            | NA                    | Hypermethylated in FP vs FN |
| cg08148802 | 0.596   | 0.219   | 0.377     | 7e-10            | NA                    | Hypermethylated in FP vs FN |
| cg15527674 | 0.823   | 0.494   | 0.330     | 7e-10            | C11orf66              | Hypermethylated in FP vs FN |
| cg06875255 | 0.722   | 0.364   | 0.359     | 7e-10            | NA                    | Hypermethylated in FP vs FN |
| cg00039385 | 0.601   | 0.249   | 0.352     | 7e-10            | SEMA6B                | Hypermethylated in FP vs FN |
| cg05050858 | 0.775   | 0.381   | 0.394     | 7e-10            | NA                    | Hypermethylated in FP vs FN |
| cg05817833 | 0.729   | 0.367   | 0.361     | 7e-10            | NA                    | Hypermethylated in FP vs FN |
| cg06637330 | 0.747   | 0.275   | 0.472     | 7e-10            | NA                    | Hypermethylated in FP vs FN |
| cg14064268 | 0.673   | 0.223   | 0.450     | 7e-10            | NA                    | Hypermethylated in FP vs FN |
| cg01407254 | 0.828   | 0.342   | 0.486     | 7e-10            | NA                    | Hypermethylated in FP vs FN |
| cg21687563 | 0.614   | 0.228   | 0.386     | 7e-10            | NA                    | Hypermethylated in FP vs FN |
| cg05805326 | 0.753   | 0.363   | 0.390     | 8e-10            | NA                    | Hypermethylated in FP vs FN |
| cg00454770 | 0.745   | 0.397   | 0.348     | 8e-10            | ABLIM1                | Hypermethylated in FP vs FN |
| cg11093939 | 0.826   | 0.522   | 0.304     | 8e-10            | NA                    | Hypermethylated in FP vs FN |
| cg16554164 | 0.706   | 0.303   | 0.403     | 8e-10            | NA                    | Hypermethylated in FP vs FN |
| cg17244980 | 0.658   | 0.283   | 0.375     | 8e-10            | NA                    | Hypermethylated in FP vs FN |
| cg05915866 | 0.645   | 0.257   | 0.388     | 8e-10            | NA                    | Hypermethylated in FP vs FN |
| cg08227353 | 0.621   | 0.216   | 0.405     | 8e-10            | KAZALD1               | Hypermethylated in FP vs FN |
| cg00674220 | 0.810   | 0.469   | 0.341     | 8e-10            | NA                    | Hypermethylated in FP vs FN |

### Supplementary Table 7 (continued)

| Probe      | FP.mean | FN.mean | Mean.diff | Adjusted.P.value | Promoter.related.gene | Category                    |
|------------|---------|---------|-----------|------------------|-----------------------|-----------------------------|
| cg19164987 | 0.808   | 0.297   | 0.511     | 8e-10            | NA                    | Hypermethylated in FP vs FN |
| cg01098320 | 0.790   | 0.293   | 0.498     | 8e-10            | NA                    | Hypermethylated in FP vs FN |
| cg12895304 | 0.897   | 0.492   | 0.405     | 8e-10            | NA                    | Hypermethylated in FP vs FN |
| cg16081096 | 0.764   | 0.370   | 0.394     | 8e-10            | NA                    | Hypermethylated in FP vs FN |
| cg18843856 | 0.793   | 0.411   | 0.382     | 8e-10            | NA                    | Hypermethylated in FP vs FN |
| cg07665929 | 0.844   | 0.529   | 0.315     | 8e-10            | NA                    | Hypermethylated in FP vs FN |
| cg06623827 | 0.606   | 0.161   | 0.446     | 8e-10            | DRD1                  | Hypermethylated in FP vs FN |
| cg22488259 | 0.791   | 0.384   | 0.407     | 8e-10            | NAV1                  | Hypermethylated in FP vs FN |
| cg16991515 | 0.711   | 0.159   | 0.552     | 8e-10            | HIST1H4I              | Hypermethylated in FP vs FN |
| cg13023619 | 0.765   | 0.463   | 0.302     | 8e-10            | NA                    | Hypermethylated in FP vs FN |
| cg25661792 | 0.755   | 0.467   | 0.288     | 8e-10            | NA                    | Hypermethylated in FP vs FN |
| cg12160664 | 0.654   | 0.282   | 0.372     | 8e-10            | OLFML3                | Hypermethylated in FP vs FN |
| cg23336973 | 0.815   | 0.454   | 0.360     | 8e-10            | NA                    | Hypermethylated in FP vs FN |
| cg00421221 | 0.630   | 0.331   | 0.299     | 8e-10            | NA                    | Hypermethylated in FP vs FN |
| cg19241619 | 0.880   | 0.482   | 0.398     | 8e-10            | NA                    | Hypermethylated in FP vs FN |
| cg01082498 | 0.540   | 0.109   | 0.431     | 9e-10            | NA                    | Hypermethylated in FP vs FN |
| cg06212263 | 0.754   | 0.292   | 0.462     | 9e-10            | NA                    | Hypermethylated in FP vs FN |
| cg13877974 | 0.785   | 0.287   | 0.498     | 9e-10            | NAV1                  | Hypermethylated in FP vs FN |
| cg08760493 | 0.842   | 0.565   | 0.278     | 9e-10            | NA                    | Hypermethylated in FP vs FN |
| cg15447913 | 0.810   | 0.332   | 0.478     | 9e-10            | NA                    | Hypermethylated in FP vs FN |
| cg16523590 | 0.749   | 0.328   | 0.421     | 9e-10            | NA                    | Hypermethylated in FP vs FN |
| cg10018519 | 0.603   | 0.191   | 0.412     | 9e-10            | NA                    | Hypermethylated in FP vs FN |
| cg17310654 | 0.737   | 0.366   | 0.371     | 9e-10            | NA                    | Hypermethylated in FP vs FN |
| cg04062218 | 0.756   | 0.405   | 0.351     | 9e-10            | NA                    | Hypermethylated in FP vs FN |
| cg19480117 | 0.756   | 0.415   | 0.342     | 9e-10            | NA                    | Hypermethylated in FP vs FN |

### Supplementary Table 7 (continued)

| Probe      | FP.mean | FN.mean | Mean.diff | Adjusted.P.value | Promoter.related.gene | Category                    |
|------------|---------|---------|-----------|------------------|-----------------------|-----------------------------|
| cg02722657 | 0.728   | 0.306   | 0.422     | 1e-09            | RAPGEFL1              | Hypermethylated in FP vs FN |
| cg26020878 | 0.779   | 0.505   | 0.274     | 1e-09            | NA                    | Hypermethylated in FP vs FN |
| cg20588285 | 0.745   | 0.350   | 0.396     | 1e-09            | NA                    | Hypermethylated in FP vs FN |
| cg00651497 | 0.708   | 0.251   | 0.457     | 1e-09            | NA                    | Hypermethylated in FP vs FN |
| cg19894975 | 0.379   | 0.112   | 0.268     | 1e-09            | NA                    | Hypermethylated in FP vs FN |
| cg06144675 | 0.853   | 0.547   | 0.306     | 1e-09            | SEMA3A                | Hypermethylated in FP vs FN |
| cg21546022 | 0.725   | 0.370   | 0.355     | 1e-09            | NA                    | Hypermethylated in FP vs FN |
| cg10958362 | 0.737   | 0.302   | 0.435     | 1e-09            | NA                    | Hypermethylated in FP vs FN |
| cg07402310 | 0.786   | 0.533   | 0.253     | 1e-09            | NA                    | Hypermethylated in FP vs FN |
| cg21225667 | 0.807   | 0.471   | 0.336     | 1e-09            | NA                    | Hypermethylated in FP vs FN |
| cg25167447 | 0.722   | 0.281   | 0.441     | 1e-09            | NAV1                  | Hypermethylated in FP vs FN |
| cg10759590 | 0.563   | 0.286   | 0.277     | 1e-09            | KHNYN_CBLN3           | Hypermethylated in FP vs FN |
| cg11139446 | 0.592   | 0.295   | 0.297     | 1e-09            | NA                    | Hypermethylated in FP vs FN |
| cg02538557 | 0.566   | 0.268   | 0.297     | 1e-09            | NA                    | Hypermethylated in FP vs FN |
| cg15442800 | 0.754   | 0.311   | 0.443     | 1e-09            | NA                    | Hypermethylated in FP vs FN |
| cg26824174 | 0.778   | 0.372   | 0.406     | 1e-09            | NA                    | Hypermethylated in FP vs FN |
| cg03530983 | 0.821   | 0.445   | 0.376     | 1e-09            | NA                    | Hypermethylated in FP vs FN |
| cg15771416 | 0.779   | 0.424   | 0.354     | 1e-09            | NA                    | Hypermethylated in FP vs FN |
| cg06866187 | 0.774   | 0.358   | 0.417     | 1e-09            | NA                    | Hypermethylated in FP vs FN |
| cg07605523 | 0.605   | 0.212   | 0.393     | 1e-09            | NA                    | Hypermethylated in FP vs FN |
| cg04185382 | 0.783   | 0.387   | 0.396     | 1e-09            | NA                    | Hypermethylated in FP vs FN |
| cg03066788 | 0.664   | 0.294   | 0.370     | 1e-09            | NA                    | Hypermethylated in FP vs FN |
| cg18809102 | 0.683   | 0.325   | 0.358     | 1e-09            | NA                    | Hypermethylated in FP vs FN |
| cg08820369 | 0.839   | 0.419   | 0.419     | 1e-09            | NA                    | Hypermethylated in FP vs FN |
| cg04457069 | 0.849   | 0.354   | 0.495     | 1e-09            | NA                    | Hypermethylated in FP vs FN |

### Supplementary Table 7 (continued)

| Probe      | FP.mean | FN.mean | Mean.diff | Adjusted.P.value | Promoter.related.gene | Category                    |
|------------|---------|---------|-----------|------------------|-----------------------|-----------------------------|
| cg21394039 | 0.780   | 0.504   | 0.275     | 1e-09            | NA                    | Hypermethylated in FP vs FN |
| cg18643029 | 0.496   | 0.235   | 0.261     | 1e-09            | NA                    | Hypermethylated in FP vs FN |
| cg03861097 | 0.770   | 0.279   | 0.491     | 1e-09            | NA                    | Hypermethylated in FP vs FN |
| cg03320170 | 0.510   | 0.181   | 0.329     | 1e-09            | NA                    | Hypermethylated in FP vs FN |
| cg16059167 | 0.722   | 0.312   | 0.410     | 1e-09            | NA                    | Hypermethylated in FP vs FN |
| cg24292703 | 0.792   | 0.403   | 0.389     | 1e-09            | NA                    | Hypermethylated in FP vs FN |
| cg15808835 | 0.808   | 0.507   | 0.301     | 1e-09            | NA                    | Hypermethylated in FP vs FN |
| cg04294888 | 0.613   | 0.193   | 0.420     | 1e-09            | NA                    | Hypermethylated in FP vs FN |
| cg01919377 | 0.649   | 0.203   | 0.446     | 1e-09            | NTF3                  | Hypermethylated in FP vs FN |
| cg24688343 | 0.777   | 0.465   | 0.312     | 1e-09            | NA                    | Hypermethylated in FP vs FN |
| cg20079139 | 0.640   | 0.264   | 0.376     | 1e-09            | NA                    | Hypermethylated in FP vs FN |
| cg22683038 | 0.614   | 0.158   | 0.457     | 1e-09            | NA                    | Hypermethylated in FP vs FN |
| cg10180092 | 0.754   | 0.393   | 0.361     | 1e-09            | NA                    | Hypermethylated in FP vs FN |
| cg01828733 | 0.817   | 0.424   | 0.394     | 1e-09            | NAV1                  | Hypermethylated in FP vs FN |
| cg00856041 | 0.638   | 0.256   | 0.382     | 1e-09            | NA                    | Hypermethylated in FP vs FN |
| cg19939773 | 0.665   | 0.354   | 0.311     | 1e-09            | NA                    | Hypermethylated in FP vs FN |
| cg05021589 | 0.768   | 0.309   | 0.459     | 1e-09            | LY86                  | Hypermethylated in FP vs FN |
| cg12583076 | 0.727   | 0.429   | 0.297     | 1e-09            | NA                    | Hypermethylated in FP vs FN |
| cg19280785 | 0.645   | 0.320   | 0.325     | 1e-09            | NA                    | Hypermethylated in FP vs FN |
| cg06271387 | 0.763   | 0.340   | 0.423     | 1e-09            | NA                    | Hypermethylated in FP vs FN |
| cg11635029 | 0.851   | 0.409   | 0.442     | 1e-09            | NA                    | Hypermethylated in FP vs FN |
| cg06813382 | 0.731   | 0.398   | 0.333     | 1e-09            | NA                    | Hypermethylated in FP vs FN |
| cg16903735 | 0.650   | 0.164   | 0.486     | 1e-09            | NA                    | Hypermethylated in FP vs FN |
| cg16006349 | 0.773   | 0.292   | 0.481     | 1e-09            | NA                    | Hypermethylated in FP vs FN |
| cg25216696 | 0.727   | 0.271   | 0.456     | 1e-09            | NA                    | Hypermethylated in FP vs FN |

### Supplementary Table 7 (continued)

| Probe      | FP.mean | FN.mean | Mean.diff | Adjusted.P.value | Promoter.related.gene | Category                    |
|------------|---------|---------|-----------|------------------|-----------------------|-----------------------------|
| cg07195224 | 0.794   | 0.399   | 0.394     | 1e-09            | AIM2                  | Hypermethylated in FP vs FN |
| cg16998564 | 0.755   | 0.352   | 0.404     | 1e-09            | NA                    | Hypermethylated in FP vs FN |
| cg03765423 | 0.656   | 0.249   | 0.407     | 1e-09            | NA                    | Hypermethylated in FP vs FN |
| cg26998850 | 0.643   | 0.222   | 0.421     | 2e-09            | NA                    | Hypermethylated in FP vs FN |
| cg23893620 | 0.564   | 0.199   | 0.365     | 2e-09            | KCNIP4                | Hypermethylated in FP vs FN |
| cg05917419 | 0.680   | 0.267   | 0.413     | 2e-09            | NA                    | Hypermethylated in FP vs FN |
| cg14064694 | 0.751   | 0.251   | 0.500     | 2e-09            | HIST1H2BI             | Hypermethylated in FP vs FN |
| cg01313904 | 0.690   | 0.181   | 0.508     | 2e-09            | NA                    | Hypermethylated in FP vs FN |
| cg02347249 | 0.735   | 0.381   | 0.354     | 2e-09            | NA                    | Hypermethylated in FP vs FN |
| cg17180631 | 0.532   | 0.161   | 0.372     | 2e-09            | NAV1                  | Hypermethylated in FP vs FN |
| cg18465515 | 0.727   | 0.198   | 0.529     | 2e-09            | HIST1H2BI             | Hypermethylated in FP vs FN |
| cg24795614 | 0.716   | 0.451   | 0.265     | 2e-09            | NA                    | Hypermethylated in FP vs FN |
| cg19201144 | 0.789   | 0.482   | 0.307     | 2e-09            | NA                    | Hypermethylated in FP vs FN |
| cg14977875 | 0.553   | 0.189   | 0.364     | 2e-09            | NA                    | Hypermethylated in FP vs FN |
| cg19317226 | 0.823   | 0.351   | 0.471     | 2e-09            | NA                    | Hypermethylated in FP vs FN |
| cg12497581 | 0.696   | 0.343   | 0.353     | 2e-09            | LFNG                  | Hypermethylated in FP vs FN |
| cg26528311 | 0.640   | 0.335   | 0.304     | 2e-09            | NA                    | Hypermethylated in FP vs FN |
| cg02100602 | 0.611   | 0.196   | 0.415     | 2e-09            | NA                    | Hypermethylated in FP vs FN |
| cg04854098 | 0.732   | 0.367   | 0.364     | 2e-09            | NA                    | Hypermethylated in FP vs FN |
| cg25107522 | 0.764   | 0.477   | 0.286     | 2e-09            | NA                    | Hypermethylated in FP vs FN |
| cg05379350 | 0.642   | 0.341   | 0.301     | 2e-09            | GIT1                  | Hypermethylated in FP vs FN |
| cg05798126 | 0.827   | 0.539   | 0.288     | 2e-09            | NA                    | Hypermethylated in FP vs FN |
| cg11189384 | 0.594   | 0.131   | 0.464     | 2e-09            | NA                    | Hypermethylated in FP vs FN |
| cg07757358 | 0.692   | 0.268   | 0.425     | 2e-09            | NA                    | Hypermethylated in FP vs FN |
| cg17910564 | 0.853   | 0.569   | 0.285     | 2e-09            | VDAC3                 | Hypermethylated in FP vs FN |



### Supplementary Table 7 (continued)

| Probe      | FP.mean | FN.mean | Mean.diff | Adjusted.P.value | Promoter.related.gene | Category                    |
|------------|---------|---------|-----------|------------------|-----------------------|-----------------------------|
| cg10512203 | 0.563   | 0.251   | 0.311     | 2e-09            | NA                    | Hypermethylated in FP vs FN |
| cg22272282 | 0.744   | 0.214   | 0.530     | 2e-09            | NA                    | Hypermethylated in FP vs FN |
| cg08205361 | 0.501   | 0.168   | 0.333     | 2e-09            | NA                    | Hypermethylated in FP vs FN |
| cg19584674 | 0.576   | 0.270   | 0.306     | 2e-09            | KHNYN_CBLN3           | Hypermethylated in FP vs FN |
| cg14222474 | 0.801   | 0.423   | 0.378     | 2e-09            | NA                    | Hypermethylated in FP vs FN |
| cg21269897 | 0.605   | 0.161   | 0.444     | 2e-09            | HIST1H4I              | Hypermethylated in FP vs FN |
| cg14018454 | 0.794   | 0.490   | 0.304     | 2e-09            | NA                    | Hypermethylated in FP vs FN |
| cg23184252 | 0.677   | 0.253   | 0.423     | 2e-09            | NA                    | Hypermethylated in FP vs FN |
| cg01980793 | 0.569   | 0.180   | 0.389     | 2e-09            | NA                    | Hypermethylated in FP vs FN |
| cg08073667 | 0.838   | 0.371   | 0.467     | 2e-09            | NA                    | Hypermethylated in FP vs FN |
| cg10765397 | 0.800   | 0.445   | 0.355     | 2e-09            | NA                    | Hypermethylated in FP vs FN |
| cg18535283 | 0.698   | 0.425   | 0.273     | 2e-09            | CYB5R3                | Hypermethylated in FP vs FN |
| cg06212213 | 0.780   | 0.500   | 0.280     | 2e-09            | NA                    | Hypermethylated in FP vs FN |
| cg05324789 | 0.705   | 0.304   | 0.401     | 2e-09            | NA                    | Hypermethylated in FP vs FN |
| cg15310568 | 0.594   | 0.244   | 0.350     | 2e-09            | MAP2                  | Hypermethylated in FP vs FN |
| cg14487356 | 0.714   | 0.317   | 0.397     | 2e-09            | NA                    | Hypermethylated in FP vs FN |
| cg17537252 | 0.624   | 0.173   | 0.451     | 2e-09            | ARHGEF3               | Hypermethylated in FP vs FN |
| cg03309328 | 0.609   | 0.253   | 0.356     | 2e-09            | NA                    | Hypermethylated in FP vs FN |
| cg02212836 | 0.693   | 0.272   | 0.421     | 2e-09            | LY86                  | Hypermethylated in FP vs FN |
| cg04993130 | 0.554   | 0.230   | 0.324     | 2e-09            | NA                    | Hypermethylated in FP vs FN |
| cg13745832 | 0.849   | 0.400   | 0.449     | 2e-09            | NA                    | Hypermethylated in FP vs FN |
| cg01660630 | 0.547   | 0.180   | 0.367     | 2e-09            | NA                    | Hypermethylated in FP vs FN |
| cg16051561 | 0.730   | 0.390   | 0.340     | 2e-09            | NA                    | Hypermethylated in FP vs FN |
| cg18650219 | 0.755   | 0.306   | 0.448     | 2e-09            | NA                    | Hypermethylated in FP vs FN |
| cg15600176 | 0.746   | 0.341   | 0.405     | 2e-09            | NA                    | Hypermethylated in FP vs FN |

### Supplementary Table 7 (continued)

| Probe      | FP.mean | FN.mean | Mean.diff | Adjusted.P.value | Promoter.related.gene | Category                    |
|------------|---------|---------|-----------|------------------|-----------------------|-----------------------------|
| cg15382568 | 0.580   | 0.281   | 0.300     | 2e-09            | NA                    | Hypermethylated in FP vs FN |
| cg11608884 | 0.571   | 0.173   | 0.398     | 2e-09            | NA                    | Hypermethylated in FP vs FN |
| cg20153322 | 0.705   | 0.401   | 0.304     | 2e-09            | PXN                   | Hypermethylated in FP vs FN |
| cg13661703 | 0.858   | 0.445   | 0.412     | 2e-09            | NA                    | Hypermethylated in FP vs FN |
| cg08666707 | 0.669   | 0.354   | 0.314     | 2e-09            | NA                    | Hypermethylated in FP vs FN |
| cg05194102 | 0.893   | 0.443   | 0.450     | 2e-09            | NA                    | Hypermethylated in FP vs FN |
| cg13842800 | 0.742   | 0.404   | 0.338     | 2e-09            | NA                    | Hypermethylated in FP vs FN |
| cg04700215 | 0.886   | 0.629   | 0.257     | 2e-09            | NA                    | Hypermethylated in FP vs FN |
| cg11854183 | 0.741   | 0.366   | 0.375     | 2e-09            | NA                    | Hypermethylated in FP vs FN |
| cg22777979 | 0.440   | 0.124   | 0.316     | 2e-09            | B3GAT1                | Hypermethylated in FP vs FN |
| cg07362328 | 0.691   | 0.251   | 0.440     | 2e-09            | NA                    | Hypermethylated in FP vs FN |
| cg27637521 | 0.588   | 0.157   | 0.431     | 2e-09            | NA                    | Hypermethylated in FP vs FN |
| cg27422872 | 0.513   | 0.111   | 0.403     | 2e-09            | NA                    | Hypermethylated in FP vs FN |
| cg14952949 | 0.541   | 0.205   | 0.336     | 2e-09            | MYF5                  | Hypermethylated in FP vs FN |
| cg11958644 | 0.705   | 0.304   | 0.401     | 2e-09            | NA                    | Hypermethylated in FP vs FN |
| cg08378932 | 0.699   | 0.405   | 0.294     | 2e-09            | TM4SF4                | Hypermethylated in FP vs FN |
| cg23886314 | 0.790   | 0.512   | 0.278     | 3e-09            | NA                    | Hypermethylated in FP vs FN |
| cg02192855 | 0.745   | 0.208   | 0.537     | 3e-09            | HIST1H2BI             | Hypermethylated in FP vs FN |
| cg05974733 | 0.611   | 0.237   | 0.373     | 3e-09            | NA                    | Hypermethylated in FP vs FN |
| cg08287940 | 0.865   | 0.578   | 0.286     | 3e-09            | NA                    | Hypermethylated in FP vs FN |
| cg00310410 | 0.783   | 0.472   | 0.312     | 3e-09            | NA                    | Hypermethylated in FP vs FN |
| cg00711291 | 0.851   | 0.559   | 0.292     | 3e-09            | NA                    | Hypermethylated in FP vs FN |
| cg03763874 | 0.733   | 0.411   | 0.323     | 3e-09            | NA                    | Hypermethylated in FP vs FN |
| cg14406727 | 0.736   | 0.339   | 0.397     | 3e-09            | NA                    | Hypermethylated in FP vs FN |
| cg26222731 | 0.727   | 0.458   | 0.269     | 3e-09            | NA                    | Hypermethylated in FP vs FN |

### Supplementary Table 7 (continued)

| Probe      | FP.mean | FN.mean | Mean.diff | Adjusted.P.value | Promoter.related.gene | Category                    |
|------------|---------|---------|-----------|------------------|-----------------------|-----------------------------|
| cg00755751 | 0.736   | 0.384   | 0.351     | 3e-09            | NA                    | Hypermethylated in FP vs FN |
| cg15644626 | 0.800   | 0.458   | 0.342     | 3e-09            | NA                    | Hypermethylated in FP vs FN |
| cg02709139 | 0.709   | 0.264   | 0.445     | 3e-09            | NA                    | Hypermethylated in FP vs FN |
| cg17467968 | 0.699   | 0.317   | 0.382     | 3e-09            | NA                    | Hypermethylated in FP vs FN |
| cg01046511 | 0.776   | 0.515   | 0.261     | 3e-09            | KDM6B                 | Hypermethylated in FP vs FN |
| cg24676514 | 0.531   | 0.133   | 0.398     | 3e-09            | NA                    | Hypermethylated in FP vs FN |
| cg25367334 | 0.816   | 0.533   | 0.283     | 3e-09            | NA                    | Hypermethylated in FP vs FN |
| cg20364574 | 0.823   | 0.403   | 0.420     | 3e-09            | NA                    | Hypermethylated in FP vs FN |
| cg05852143 | 0.656   | 0.182   | 0.475     | 3e-09            | NTF3                  | Hypermethylated in FP vs FN |
| cg06605053 | 0.713   | 0.308   | 0.404     | 3e-09            | NA                    | Hypermethylated in FP vs FN |
| cg12457659 | 0.729   | 0.402   | 0.326     | 3e-09            | NA                    | Hypermethylated in FP vs FN |
| cg23123731 | 0.785   | 0.420   | 0.366     | 3e-09            | NA                    | Hypermethylated in FP vs FN |
| cg19190593 | 0.808   | 0.440   | 0.368     | 3e-09            | LY86                  | Hypermethylated in FP vs FN |
| cg24860886 | 0.643   | 0.303   | 0.340     | 3e-09            | GRHL3                 | Hypermethylated in FP vs FN |
| cg10279487 | 0.498   | 0.103   | 0.395     | 3e-09            | NA                    | Hypermethylated in FP vs FN |
| cg00974944 | 0.825   | 0.444   | 0.381     | 3e-09            | NA                    | Hypermethylated in FP vs FN |
| cg26448609 | 0.848   | 0.591   | 0.257     | 3e-09            | NA                    | Hypermethylated in FP vs FN |
| cg16427420 | 0.693   | 0.332   | 0.361     | 3e-09            | NA                    | Hypermethylated in FP vs FN |
| cg19851715 | 0.672   | 0.204   | 0.468     | 3e-09            | HIST1H2BI             | Hypermethylated in FP vs FN |
| cg15772924 | 0.793   | 0.269   | 0.524     | 3e-09            | NA                    | Hypermethylated in FP vs FN |
| cg09192801 | 0.898   | 0.540   | 0.358     | 3e-09            | ZDHHC17               | Hypermethylated in FP vs FN |
| cg07866001 | 0.695   | 0.283   | 0.411     | 3e-09            | NA                    | Hypermethylated in FP vs FN |
| cg03989480 | 0.716   | 0.270   | 0.446     | 3e-09            | NA                    | Hypermethylated in FP vs FN |
| cg06580014 | 0.831   | 0.482   | 0.349     | 3e-09            | NA                    | Hypermethylated in FP vs FN |
| cg05822532 | 0.738   | 0.220   | 0.517     | 3e-09            | ELN                   | Hypermethylated in FP vs FN |

### Supplementary Table 7 (continued)

| Probe      | FP.mean | FN.mean | Mean.diff | Adjusted.P.value | Promoter.related.gene | Category                    |
|------------|---------|---------|-----------|------------------|-----------------------|-----------------------------|
| cg00887848 | 0.642   | 0.291   | 0.351     | 3e-09            | NA                    | Hypermethylated in FP vs FN |
| cg05726239 | 0.612   | 0.240   | 0.372     | 3e-09            | NA                    | Hypermethylated in FP vs FN |
| cg16809460 | 0.684   | 0.196   | 0.488     | 3e-09            | NA                    | Hypermethylated in FP vs FN |
| cg21039708 | 0.825   | 0.280   | 0.545     | 3e-09            | OTX2OS1               | Hypermethylated in FP vs FN |
| cg09626984 | 0.788   | 0.318   | 0.470     | 3e-09            | NA                    | Hypermethylated in FP vs FN |
| cg26902647 | 0.816   | 0.518   | 0.298     | 3e-09            | NA                    | Hypermethylated in FP vs FN |
| cg21571466 | 0.426   | 0.169   | 0.257     | 3e-09            | TAGLN2                | Hypermethylated in FP vs FN |
| cg23057870 | 0.710   | 0.321   | 0.390     | 3e-09            | NA                    | Hypermethylated in FP vs FN |
| cg10019018 | 0.842   | 0.433   | 0.409     | 3e-09            | NA                    | Hypermethylated in FP vs FN |
| cg20663495 | 0.586   | 0.259   | 0.326     | 3e-09            | NA                    | Hypermethylated in FP vs FN |
| cg03098159 | 0.775   | 0.289   | 0.486     | 3e-09            | NA                    | Hypermethylated in FP vs FN |
| cg23725027 | 0.706   | 0.376   | 0.330     | 3e-09            | NA                    | Hypermethylated in FP vs FN |
| cg15890143 | 0.561   | 0.124   | 0.437     | 3e-09            | NA                    | Hypermethylated in FP vs FN |
| cg13050716 | 0.585   | 0.262   | 0.322     | 3e-09            | NA                    | Hypermethylated in FP vs FN |
| cg10508317 | 0.566   | 0.120   | 0.446     | 3e-09            | NA                    | Hypermethylated in FP vs FN |
| cg13283635 | 0.597   | 0.249   | 0.347     | 3e-09            | NA                    | Hypermethylated in FP vs FN |
| cg06471536 | 0.827   | 0.486   | 0.341     | 3e-09            | NA                    | Hypermethylated in FP vs FN |
| cg23144063 | 0.643   | 0.298   | 0.345     | 3e-09            | NA                    | Hypermethylated in FP vs FN |
| cg24000859 | 0.596   | 0.263   | 0.333     | 3e-09            | NA                    | Hypermethylated in FP vs FN |
| cg10422816 | 0.771   | 0.401   | 0.371     | 3e-09            | MSTN                  | Hypermethylated in FP vs FN |
| cg08828594 | 0.575   | 0.204   | 0.370     | 3e-09            | NA                    | Hypermethylated in FP vs FN |
| cg02573551 | 0.732   | 0.476   | 0.256     | 3e-09            | NA                    | Hypermethylated in FP vs FN |
| cg12877335 | 0.652   | 0.327   | 0.325     | 3e-09            | NA                    | Hypermethylated in FP vs FN |
| cg06272045 | 0.816   | 0.451   | 0.365     | 3e-09            | NA                    | Hypermethylated in FP vs FN |
| cg16962463 | 0.604   | 0.270   | 0.334     | 3e-09            | NA                    | Hypermethylated in FP vs FN |

### Supplementary Table 7 (continued)

| Probe      | FP.mean | FN.mean | Mean.diff | Adjusted.P.value | Promoter.related.gene | Category                    |
|------------|---------|---------|-----------|------------------|-----------------------|-----------------------------|
| cg23323203 | 0.574   | 0.298   | 0.276     | 3e-09            | NA                    | Hypermethylated in FP vs FN |
| cg20415947 | 0.794   | 0.387   | 0.407     | 3e-09            | NA                    | Hypermethylated in FP vs FN |
| cg05202347 | 0.804   | 0.462   | 0.342     | 3e-09            | NA                    | Hypermethylated in FP vs FN |
| cg02276070 | 0.719   | 0.374   | 0.345     | 3e-09            | ARSI                  | Hypermethylated in FP vs FN |
| cg11690884 | 0.490   | 0.234   | 0.256     | 3e-09            | NA                    | Hypermethylated in FP vs FN |
| cg13933279 | 0.619   | 0.260   | 0.359     | 4e-09            | NA                    | Hypermethylated in FP vs FN |
| cg27144115 | 0.624   | 0.260   | 0.364     | 4e-09            | NA                    | Hypermethylated in FP vs FN |
| cg08161546 | 0.697   | 0.427   | 0.270     | 4e-09            | ESR1                  | Hypermethylated in FP vs FN |
| cg04944536 | 0.782   | 0.358   | 0.424     | 4e-09            | NA                    | Hypermethylated in FP vs FN |
| cg16023122 | 0.505   | 0.157   | 0.348     | 4e-09            | NAV1                  | Hypermethylated in FP vs FN |
| cg25389863 | 0.813   | 0.476   | 0.337     | 4e-09            | NA                    | Hypermethylated in FP vs FN |
| cg07810039 | 0.736   | 0.308   | 0.428     | 4e-09            | NA                    | Hypermethylated in FP vs FN |
| cg03906016 | 0.880   | 0.537   | 0.343     | 4e-09            | NA                    | Hypermethylated in FP vs FN |
| cg18232347 | 0.816   | 0.432   | 0.384     | 4e-09            | NA                    | Hypermethylated in FP vs FN |
| cg19388273 | 0.724   | 0.460   | 0.264     | 4e-09            | NA                    | Hypermethylated in FP vs FN |
| cg08134504 | 0.641   | 0.292   | 0.349     | 4e-09            | NA                    | Hypermethylated in FP vs FN |
| cg14017402 | 0.575   | 0.277   | 0.298     | 4e-09            | NA                    | Hypermethylated in FP vs FN |
| cg17795240 | 0.732   | 0.345   | 0.387     | 4e-09            | NA                    | Hypermethylated in FP vs FN |
| cg18863156 | 0.568   | 0.129   | 0.439     | 4e-09            | NA                    | Hypermethylated in FP vs FN |
| cg13790353 | 0.714   | 0.256   | 0.458     | 4e-09            | CCDC83                | Hypermethylated in FP vs FN |
| cg17314888 | 0.559   | 0.175   | 0.384     | 4e-09            | ELN                   | Hypermethylated in FP vs FN |
| cg14405924 | 0.552   | 0.148   | 0.405     | 4e-09            | NA                    | Hypermethylated in FP vs FN |
| cg20495370 | 0.652   | 0.321   | 0.331     | 4e-09            | NA                    | Hypermethylated in FP vs FN |
| cg24667603 | 0.718   | 0.446   | 0.272     | 4e-09            | NA                    | Hypermethylated in FP vs FN |
| cg22558825 | 0.494   | 0.168   | 0.326     | 4e-09            | NA                    | Hypermethylated in FP vs FN |

### Supplementary Table 7 (continued)

| Probe      | FP.mean | FN.mean | Mean.diff | Adjusted.P.value | Promoter.related.gene | Category                    |
|------------|---------|---------|-----------|------------------|-----------------------|-----------------------------|
| cg05941864 | 0.600   | 0.257   | 0.342     | 4e-09            | NA                    | Hypermethylated in FP vs FN |
| cg26785370 | 0.757   | 0.488   | 0.270     | 4e-09            | NA                    | Hypermethylated in FP vs FN |
| cg20686479 | 0.769   | 0.242   | 0.527     | 4e-09            | NA                    | Hypermethylated in FP vs FN |
| cg17645695 | 0.762   | 0.309   | 0.453     | 4e-09            | NA                    | Hypermethylated in FP vs FN |
| cg00223767 | 0.733   | 0.335   | 0.398     | 4e-09            | NA                    | Hypermethylated in FP vs FN |
| cg08794763 | 0.856   | 0.583   | 0.273     | 4e-09            | NA                    | Hypermethylated in FP vs FN |
| cg14066207 | 0.670   | 0.322   | 0.348     | 4e-09            | NA                    | Hypermethylated in FP vs FN |
| cg12999932 | 0.584   | 0.305   | 0.278     | 4e-09            | NA                    | Hypermethylated in FP vs FN |
| cg00095326 | 0.488   | 0.174   | 0.314     | 4e-09            | NA                    | Hypermethylated in FP vs FN |
| cg04878072 | 0.570   | 0.187   | 0.383     | 4e-09            | NA                    | Hypermethylated in FP vs FN |
| cg16530498 | 0.608   | 0.230   | 0.377     | 4e-09            | HSD17B14              | Hypermethylated in FP vs FN |
| cg06917772 | 0.777   | 0.412   | 0.365     | 4e-09            | NA                    | Hypermethylated in FP vs FN |
| cg21791662 | 0.598   | 0.150   | 0.448     | 4e-09            | NA                    | Hypermethylated in FP vs FN |
| cg04094225 | 0.717   | 0.393   | 0.325     | 4e-09            | NA                    | Hypermethylated in FP vs FN |
| cg07816247 | 0.788   | 0.467   | 0.321     | 4e-09            | NA                    | Hypermethylated in FP vs FN |
| cg26343958 | 0.727   | 0.308   | 0.419     | 4e-09            | NA                    | Hypermethylated in FP vs FN |
| cg03962527 | 0.723   | 0.330   | 0.392     | 4e-09            | ADD3                  | Hypermethylated in FP vs FN |
| cg01519094 | 0.514   | 0.212   | 0.302     | 4e-09            | PKNOX2                | Hypermethylated in FP vs FN |
| cg06773116 | 0.781   | 0.417   | 0.364     | 4e-09            | KCNIP4                | Hypermethylated in FP vs FN |
| cg11027058 | 0.630   | 0.098   | 0.533     | 4e-09            | DYSF                  | Hypermethylated in FP vs FN |
| cg20731529 | 0.499   | 0.233   | 0.266     | 5e-09            | NA                    | Hypermethylated in FP vs FN |
| cg16895672 | 0.623   | 0.276   | 0.347     | 5e-09            | NA                    | Hypermethylated in FP vs FN |
| cg26814835 | 0.727   | 0.358   | 0.369     | 5e-09            | NA                    | Hypermethylated in FP vs FN |
| cg02384661 | 0.598   | 0.199   | 0.399     | 5e-09            | NA                    | Hypermethylated in FP vs FN |
| cg14982133 | 0.715   | 0.194   | 0.521     | 5e-09            | NA                    | Hypermethylated in FP vs FN |

### Supplementary Table 7 (continued)

| Probe      | FP.mean | FN.mean | Mean.diff | Adjusted.P.value | Promoter.related.gene | Category                    |
|------------|---------|---------|-----------|------------------|-----------------------|-----------------------------|
| cg19447966 | 0.793   | 0.366   | 0.427     | 5e-09            | NA                    | Hypermethylated in FP vs FN |
| cg02599464 | 0.679   | 0.153   | 0.526     | 5e-09            | HIST1H4I              | Hypermethylated in FP vs FN |
| cg06787104 | 0.660   | 0.221   | 0.439     | 5e-09            | NA                    | Hypermethylated in FP vs FN |
| cg06717615 | 0.777   | 0.414   | 0.363     | 5e-09            | NA                    | Hypermethylated in FP vs FN |
| cg09975367 | 0.715   | 0.373   | 0.341     | 5e-09            | NA                    | Hypermethylated in FP vs FN |
| cg00152946 | 0.760   | 0.276   | 0.484     | 5e-09            | NA                    | Hypermethylated in FP vs FN |
| cg05310774 | 0.604   | 0.223   | 0.381     | 5e-09            | NA                    | Hypermethylated in FP vs FN |
| cg09000779 | 0.692   | 0.307   | 0.384     | 5e-09            | NA                    | Hypermethylated in FP vs FN |
| cg13546736 | 0.452   | 0.188   | 0.264     | 5e-09            | MPDU1                 | Hypermethylated in FP vs FN |
| cg08235970 | 0.487   | 0.169   | 0.318     | 5e-09            | PAX7                  | Hypermethylated in FP vs FN |
| cg19513744 | 0.682   | 0.254   | 0.428     | 5e-09            | ARHGEF3               | Hypermethylated in FP vs FN |
| cg01182430 | 0.897   | 0.540   | 0.358     | 5e-09            | NA                    | Hypermethylated in FP vs FN |
| cg04483701 | 0.754   | 0.378   | 0.377     | 5e-09            | NA                    | Hypermethylated in FP vs FN |
| cg23282585 | 0.700   | 0.196   | 0.504     | 5e-09            | HIST1H3G_HIST1H2BI    | Hypermethylated in FP vs FN |
| cg09663193 | 0.666   | 0.344   | 0.322     | 5e-09            | MPDU1                 | Hypermethylated in FP vs FN |
| cg03364620 | 0.713   | 0.459   | 0.255     | 5e-09            | NA                    | Hypermethylated in FP vs FN |
| cg23296652 | 0.855   | 0.435   | 0.420     | 5e-09            | NA                    | Hypermethylated in FP vs FN |
| cg26605668 | 0.776   | 0.431   | 0.346     | 5e-09            | NA                    | Hypermethylated in FP vs FN |
| cg10454127 | 0.624   | 0.316   | 0.308     | 5e-09            | NA                    | Hypermethylated in FP vs FN |
| cg18109289 | 0.774   | 0.426   | 0.348     | 5e-09            | NA                    | Hypermethylated in FP vs FN |
| cg00107630 | 0.561   | 0.258   | 0.302     | 6e-09            | NA                    | Hypermethylated in FP vs FN |
| cg22020227 | 0.681   | 0.331   | 0.350     | 6e-09            | OLFML3                | Hypermethylated in FP vs FN |
| cg01074305 | 0.722   | 0.469   | 0.253     | 6e-09            | NA                    | Hypermethylated in FP vs FN |
| cg02993070 | 0.801   | 0.460   | 0.341     | 6e-09            | FERMT2                | Hypermethylated in FP vs FN |
| cg01834776 | 0.492   | 0.224   | 0.268     | 6e-09            | KHNYN_CBLN3           | Hypermethylated in FP vs FN |

### Supplementary Table 7 (continued)

| Probe      | FP.mean | FN.mean | Mean.diff | Adjusted.P.value | Promoter.related.gene | Category                    |
|------------|---------|---------|-----------|------------------|-----------------------|-----------------------------|
| cg02725065 | 0.877   | 0.496   | 0.381     | 6e-09            | NA                    | Hypermethylated in FP vs FN |
| cg26101942 | 0.826   | 0.467   | 0.359     | 6e-09            | NA                    | Hypermethylated in FP vs FN |
| cg23219253 | 0.825   | 0.497   | 0.328     | 6e-09            | NA                    | Hypermethylated in FP vs FN |
| cg25160605 | 0.796   | 0.498   | 0.298     | 6e-09            | NA                    | Hypermethylated in FP vs FN |
| cg05382956 | 0.691   | 0.313   | 0.377     | 6e-09            | NA                    | Hypermethylated in FP vs FN |
| cg17751684 | 0.853   | 0.569   | 0.284     | 6e-09            | NA                    | Hypermethylated in FP vs FN |
| cg00651488 | 0.672   | 0.332   | 0.339     | 6e-09            | NA                    | Hypermethylated in FP vs FN |
| cg01693423 | 0.865   | 0.567   | 0.298     | 6e-09            | NA                    | Hypermethylated in FP vs FN |
| cg20492868 | 0.574   | 0.296   | 0.278     | 6e-09            | NA                    | Hypermethylated in FP vs FN |
| cg11936643 | 0.737   | 0.285   | 0.452     | 6e-09            | NA                    | Hypermethylated in FP vs FN |
| cg24530480 | 0.818   | 0.506   | 0.312     | 6e-09            | NA                    | Hypermethylated in FP vs FN |
| cg09941601 | 0.774   | 0.481   | 0.292     | 6e-09            | NA                    | Hypermethylated in FP vs FN |
| cg04687241 | 0.714   | 0.351   | 0.363     | 6e-09            | NA                    | Hypermethylated in FP vs FN |
| cg18693345 | 0.696   | 0.254   | 0.442     | 6e-09            | NA                    | Hypermethylated in FP vs FN |
| cg18025838 | 0.764   | 0.452   | 0.312     | 6e-09            | NA                    | Hypermethylated in FP vs FN |
| cg01693138 | 0.722   | 0.342   | 0.380     | 6e-09            | NA                    | Hypermethylated in FP vs FN |
| cg17374364 | 0.691   | 0.409   | 0.282     | 6e-09            | NA                    | Hypermethylated in FP vs FN |
| cg07694735 | 0.792   | 0.528   | 0.264     | 6e-09            | NA                    | Hypermethylated in FP vs FN |
| cg12349884 | 0.661   | 0.217   | 0.444     | 6e-09            | HIST1H4I              | Hypermethylated in FP vs FN |
| cg16884491 | 0.772   | 0.450   | 0.322     | 6e-09            | NA                    | Hypermethylated in FP vs FN |
| cg12559119 | 0.672   | 0.315   | 0.357     | 6e-09            | NA                    | Hypermethylated in FP vs FN |
| cg21198586 | 0.734   | 0.385   | 0.349     | 6e-09            | NA                    | Hypermethylated in FP vs FN |
| cg08061598 | 0.799   | 0.542   | 0.257     | 6e-09            | FYN                   | Hypermethylated in FP vs FN |
| cg03758514 | 0.663   | 0.150   | 0.513     | 6e-09            | HIST1H2BI             | Hypermethylated in FP vs FN |
| cg19029181 | 0.824   | 0.305   | 0.519     | 7e-09            | NA                    | Hypermethylated in FP vs FN |



### Supplementary Table 7 (continued)

| Probe      | FP.mean | FN.mean | Mean.diff | Adjusted.P.value | Promoter.related.gene | Category                    |
|------------|---------|---------|-----------|------------------|-----------------------|-----------------------------|
| cg14140060 | 0.688   | 0.333   | 0.355     | 7e-09            | NA                    | Hypermethylated in FP vs FN |
| cg11118690 | 0.759   | 0.469   | 0.290     | 7e-09            | NA                    | Hypermethylated in FP vs FN |
| cg18220380 | 0.790   | 0.402   | 0.388     | 7e-09            | NA                    | Hypermethylated in FP vs FN |
| cg14161165 | 0.856   | 0.473   | 0.384     | 7e-09            | NA                    | Hypermethylated in FP vs FN |
| cg11854928 | 0.910   | 0.525   | 0.385     | 7e-09            | NA                    | Hypermethylated in FP vs FN |
| cg00453735 | 0.793   | 0.496   | 0.297     | 7e-09            | NA                    | Hypermethylated in FP vs FN |
| cg22731637 | 0.634   | 0.208   | 0.426     | 7e-09            | NA                    | Hypermethylated in FP vs FN |
| cg23497020 | 0.568   | 0.201   | 0.366     | 7e-09            | LIMA1                 | Hypermethylated in FP vs FN |
| cg05264446 | 0.527   | 0.121   | 0.406     | 7e-09            | NA                    | Hypermethylated in FP vs FN |
| cg10244706 | 0.678   | 0.214   | 0.464     | 7e-09            | NA                    | Hypermethylated in FP vs FN |
| cg24048338 | 0.741   | 0.401   | 0.340     | 7e-09            | NA                    | Hypermethylated in FP vs FN |
| cg14696535 | 0.654   | 0.187   | 0.467     | 7e-09            | HIST1H3G_HIST1H2BI    | Hypermethylated in FP vs FN |
| cg07086945 | 0.521   | 0.232   | 0.290     | 7e-09            | NA                    | Hypermethylated in FP vs FN |
| cg24670927 | 0.857   | 0.417   | 0.440     | 7e-09            | PTPLAD1               | Hypermethylated in FP vs FN |
| cg09534872 | 0.845   | 0.527   | 0.319     | 7e-09            | NA                    | Hypermethylated in FP vs FN |
| cg21686890 | 0.473   | 0.130   | 0.343     | 7e-09            | NA                    | Hypermethylated in FP vs FN |
| cg03465652 | 0.664   | 0.282   | 0.382     | 7e-09            | NA                    | Hypermethylated in FP vs FN |
| cg08031967 | 0.567   | 0.270   | 0.297     | 7e-09            | NA                    | Hypermethylated in FP vs FN |
| cg17382310 | 0.782   | 0.332   | 0.451     | 7e-09            | SLC13A4               | Hypermethylated in FP vs FN |
| cg15108047 | 0.767   | 0.435   | 0.332     | 7e-09            | NA                    | Hypermethylated in FP vs FN |
| cg16795307 | 0.480   | 0.182   | 0.298     | 7e-09            | STARD13               | Hypermethylated in FP vs FN |
| cg00602811 | 0.684   | 0.287   | 0.397     | 7e-09            | ZEB2                  | Hypermethylated in FP vs FN |
| cg00593462 | 0.800   | 0.446   | 0.354     | 7e-09            | NA                    | Hypermethylated in FP vs FN |
| cg05369142 | 0.606   | 0.119   | 0.487     | 7e-09            | NA                    | Hypermethylated in FP vs FN |
| cg19839325 | 0.597   | 0.235   | 0.362     | 7e-09            | NA                    | Hypermethylated in FP vs FN |

### Supplementary Table 7 (continued)

| Probe      | FP.mean | FN.mean | Mean.diff | Adjusted.P.value | Promoter.related.gene | Category                    |
|------------|---------|---------|-----------|------------------|-----------------------|-----------------------------|
| cg12614090 | 0.491   | 0.185   | 0.306     | 7e-09            | ABLIM1                | Hypermethylated in FP vs FN |
| cg27441486 | 0.872   | 0.442   | 0.430     | 7e-09            | NAV1                  | Hypermethylated in FP vs FN |
| cg00871980 | 0.648   | 0.329   | 0.320     | 7e-09            | NA                    | Hypermethylated in FP vs FN |
| cg18321354 | 0.678   | 0.344   | 0.334     | 7e-09            | CARD11                | Hypermethylated in FP vs FN |
| cg09792881 | 0.539   | 0.106   | 0.433     | 8e-09            | NA                    | Hypermethylated in FP vs FN |
| cg14467415 | 0.795   | 0.508   | 0.287     | 8e-09            | NA                    | Hypermethylated in FP vs FN |
| cg24526596 | 0.654   | 0.337   | 0.317     | 8e-09            | NA                    | Hypermethylated in FP vs FN |
| cg14764476 | 0.798   | 0.472   | 0.326     | 8e-09            | NA                    | Hypermethylated in FP vs FN |
| cg02139827 | 0.836   | 0.504   | 0.333     | 8e-09            | NA                    | Hypermethylated in FP vs FN |
| cg12555810 | 0.774   | 0.471   | 0.303     | 8e-09            | NA                    | Hypermethylated in FP vs FN |
| cg12603560 | 0.601   | 0.268   | 0.333     | 8e-09            | NA                    | Hypermethylated in FP vs FN |
| cg03173528 | 0.849   | 0.451   | 0.398     | 8e-09            | NA                    | Hypermethylated in FP vs FN |
| cg14077965 | 0.540   | 0.191   | 0.348     | 8e-09            | FERMT2                | Hypermethylated in FP vs FN |
| cg01261206 | 0.830   | 0.462   | 0.369     | 8e-09            | NA                    | Hypermethylated in FP vs FN |
| cg10644206 | 0.811   | 0.494   | 0.317     | 8e-09            | NA                    | Hypermethylated in FP vs FN |
| cg11179081 | 0.622   | 0.171   | 0.451     | 8e-09            | NA                    | Hypermethylated in FP vs FN |
| cg07508304 | 0.740   | 0.456   | 0.284     | 9e-09            | NA                    | Hypermethylated in FP vs FN |
| cg16387532 | 0.795   | 0.509   | 0.286     | 9e-09            | NA                    | Hypermethylated in FP vs FN |
| cg05156805 | 0.653   | 0.396   | 0.258     | 9e-09            | AIFM3                 | Hypermethylated in FP vs FN |
| cg08774207 | 0.564   | 0.145   | 0.419     | 9e-09            | NA                    | Hypermethylated in FP vs FN |
| cg05829046 | 0.654   | 0.367   | 0.287     | 9e-09            | LFNG                  | Hypermethylated in FP vs FN |
| cg10621924 | 0.789   | 0.350   | 0.439     | 9e-09            | NA                    | Hypermethylated in FP vs FN |
| cg23786209 | 0.703   | 0.405   | 0.298     | 9e-09            | NA                    | Hypermethylated in FP vs FN |
| cg01634146 | 0.844   | 0.459   | 0.386     | 9e-09            | NA                    | Hypermethylated in FP vs FN |
| cg10343367 | 0.781   | 0.348   | 0.433     | 9e-09            | NA                    | Hypermethylated in FP vs FN |

### Supplementary Table 7 (continued)

| Probe      | FP.mean | FN.mean | Mean.diff | Adjusted.P.value | Promoter.related.gene | Category                    |
|------------|---------|---------|-----------|------------------|-----------------------|-----------------------------|
| cg01059100 | 0.703   | 0.310   | 0.393     | 9e-09            | PYCARD                | Hypermethylated in FP vs FN |
| cg22917314 | 0.802   | 0.392   | 0.410     | 9e-09            | NA                    | Hypermethylated in FP vs FN |
| cg15742515 | 0.583   | 0.209   | 0.374     | 9e-09            | NA                    | Hypermethylated in FP vs FN |
| cg17069313 | 0.776   | 0.289   | 0.488     | 9e-09            | NA                    | Hypermethylated in FP vs FN |
| cg07536847 | 0.321   | 0.059   | 0.261     | 9e-09            | PAX7                  | Hypermethylated in FP vs FN |
| cg02940562 | 0.627   | 0.277   | 0.350     | 9e-09            | NA                    | Hypermethylated in FP vs FN |
| cg05790451 | 0.747   | 0.234   | 0.513     | 9e-09            | NA                    | Hypermethylated in FP vs FN |
| cg08092318 | 0.727   | 0.334   | 0.393     | 9e-09            | NA                    | Hypermethylated in FP vs FN |
| cg07818978 | 0.818   | 0.465   | 0.354     | 9e-09            | NA                    | Hypermethylated in FP vs FN |
| cg05978154 | 0.862   | 0.493   | 0.369     | 9e-09            | NA                    | Hypermethylated in FP vs FN |
| cg24631482 | 0.697   | 0.210   | 0.488     | 9e-09            | NA                    | Hypermethylated in FP vs FN |
| cg01206705 | 0.841   | 0.436   | 0.405     | 9e-09            | PTPLAD1               | Hypermethylated in FP vs FN |
| cg01208908 | 0.473   | 0.100   | 0.373     | 9e-09            | NA                    | Hypermethylated in FP vs FN |
| cg13176979 | 0.718   | 0.392   | 0.326     | 9e-09            | HMG3                  | Hypermethylated in FP vs FN |
| cg19251656 | 0.657   | 0.297   | 0.360     | 1e-08            | NA                    | Hypermethylated in FP vs FN |
| cg23546506 | 0.737   | 0.310   | 0.427     | 1e-08            | NA                    | Hypermethylated in FP vs FN |
| cg16684661 | 0.513   | 0.187   | 0.326     | 1e-08            | NA                    | Hypermethylated in FP vs FN |
| cg18610958 | 0.642   | 0.127   | 0.515     | 1e-08            | DYSF                  | Hypermethylated in FP vs FN |
| cg02385840 | 0.498   | 0.135   | 0.364     | 1e-08            | NA                    | Hypermethylated in FP vs FN |
| cg04110902 | 0.809   | 0.438   | 0.372     | 1e-08            | NA                    | Hypermethylated in FP vs FN |
| cg24830876 | 0.625   | 0.147   | 0.479     | 1e-08            | ARHGEF3               | Hypermethylated in FP vs FN |
| cg19517841 | 0.832   | 0.477   | 0.356     | 1e-08            | NA                    | Hypermethylated in FP vs FN |
| cg00183067 | 0.687   | 0.420   | 0.267     | 1e-08            | NA                    | Hypermethylated in FP vs FN |
| cg09100017 | 0.637   | 0.257   | 0.380     | 1e-08            | NA                    | Hypermethylated in FP vs FN |
| cg07201717 | 0.738   | 0.343   | 0.395     | 1e-08            | NA                    | Hypermethylated in FP vs FN |

### Supplementary Table 7 (continued)

| Probe      | FP.mean | FN.mean | Mean.diff | Adjusted.P.value | Promoter.related.gene | Category                    |
|------------|---------|---------|-----------|------------------|-----------------------|-----------------------------|
| cg21208682 | 0.519   | 0.217   | 0.303     | 1e-08            | NA                    | Hypermethylated in FP vs FN |
| cg24646414 | 0.834   | 0.386   | 0.448     | 1e-08            | NA                    | Hypermethylated in FP vs FN |
| cg22234962 | 0.646   | 0.307   | 0.339     | 1e-08            | NA                    | Hypermethylated in FP vs FN |
| cg00216655 | 0.760   | 0.467   | 0.292     | 1e-08            | NA                    | Hypermethylated in FP vs FN |
| cg05134426 | 0.801   | 0.416   | 0.385     | 1e-08            | ZNF608                | Hypermethylated in FP vs FN |
| cg01694451 | 0.789   | 0.486   | 0.303     | 1e-08            | SYT8                  | Hypermethylated in FP vs FN |
| cg24909660 | 0.574   | 0.207   | 0.367     | 1e-08            | NA                    | Hypermethylated in FP vs FN |
| cg15274294 | 0.612   | 0.268   | 0.344     | 1e-08            | NA                    | Hypermethylated in FP vs FN |
| cg04806571 | 0.791   | 0.397   | 0.395     | 1e-08            | NA                    | Hypermethylated in FP vs FN |
| cg23715104 | 0.712   | 0.326   | 0.386     | 1e-08            | SLC13A4               | Hypermethylated in FP vs FN |
| cg22902289 | 0.642   | 0.331   | 0.311     | 1e-08            | LFNG                  | Hypermethylated in FP vs FN |
| cg08455089 | 0.762   | 0.487   | 0.276     | 1e-08            | NA                    | Hypermethylated in FP vs FN |
| cg03295626 | 0.905   | 0.600   | 0.306     | 1e-08            | NA                    | Hypermethylated in FP vs FN |
| cg11377213 | 0.796   | 0.468   | 0.328     | 1e-08            | NA                    | Hypermethylated in FP vs FN |
| cg25292638 | 0.774   | 0.431   | 0.343     | 1e-08            | NA                    | Hypermethylated in FP vs FN |
| cg01440796 | 0.715   | 0.345   | 0.370     | 1e-08            | NA                    | Hypermethylated in FP vs FN |
| cg13257498 | 0.740   | 0.358   | 0.381     | 1e-08            | NA                    | Hypermethylated in FP vs FN |
| cg01119452 | 0.791   | 0.461   | 0.330     | 1e-08            | NA                    | Hypermethylated in FP vs FN |
| cg05155047 | 0.771   | 0.459   | 0.312     | 1e-08            | NA                    | Hypermethylated in FP vs FN |
| cg15994467 | 0.583   | 0.309   | 0.274     | 1e-08            | NA                    | Hypermethylated in FP vs FN |
| cg00088691 | 0.872   | 0.457   | 0.414     | 1e-08            | NA                    | Hypermethylated in FP vs FN |
| cg20509080 | 0.712   | 0.220   | 0.492     | 1e-08            | ARHGEF3               | Hypermethylated in FP vs FN |
| cg21845633 | 0.665   | 0.316   | 0.349     | 1e-08            | TMEM88                | Hypermethylated in FP vs FN |
| cg03359540 | 0.831   | 0.467   | 0.364     | 1e-08            | NA                    | Hypermethylated in FP vs FN |
| cg23831898 | 0.745   | 0.294   | 0.451     | 1e-08            | NA                    | Hypermethylated in FP vs FN |

### Supplementary Table 7 (continued)

| Probe      | FP.mean | FN.mean | Mean.diff | Adjusted.P.value | Promoter.related.gene | Category                    |
|------------|---------|---------|-----------|------------------|-----------------------|-----------------------------|
| cg00567703 | 0.768   | 0.280   | 0.487     | 1e-08            | NA                    | Hypermethylated in FP vs FN |
| cg23834919 | 0.808   | 0.458   | 0.350     | 1e-08            | NA                    | Hypermethylated in FP vs FN |
| cg14143728 | 0.757   | 0.448   | 0.309     | 1e-08            | NA                    | Hypermethylated in FP vs FN |
| cg13758780 | 0.771   | 0.405   | 0.365     | 1e-08            | NA                    | Hypermethylated in FP vs FN |
| cg15974053 | 0.655   | 0.254   | 0.402     | 1e-08            | HSD17B14              | Hypermethylated in FP vs FN |
| cg10663765 | 0.769   | 0.416   | 0.353     | 1e-08            | NA                    | Hypermethylated in FP vs FN |
| cg00560072 | 0.783   | 0.470   | 0.313     | 1e-08            | NA                    | Hypermethylated in FP vs FN |
| cg10546065 | 0.525   | 0.228   | 0.296     | 1e-08            | NA                    | Hypermethylated in FP vs FN |
| cg03317811 | 0.676   | 0.209   | 0.468     | 1e-08            | NA                    | Hypermethylated in FP vs FN |
| cg14264773 | 0.758   | 0.370   | 0.387     | 1e-08            | LEFTY1                | Hypermethylated in FP vs FN |
| cg15540341 | 0.825   | 0.496   | 0.329     | 1e-08            | NA                    | Hypermethylated in FP vs FN |
| cg25888386 | 0.729   | 0.354   | 0.375     | 1e-08            | NA                    | Hypermethylated in FP vs FN |
| cg15491102 | 0.778   | 0.503   | 0.275     | 1e-08            | NA                    | Hypermethylated in FP vs FN |
| cg12013321 | 0.562   | 0.264   | 0.298     | 1e-08            | GCLC                  | Hypermethylated in FP vs FN |
| cg03674127 | 0.572   | 0.103   | 0.469     | 1e-08            | DYSF                  | Hypermethylated in FP vs FN |
| cg12874792 | 0.878   | 0.499   | 0.379     | 1e-08            | NA                    | Hypermethylated in FP vs FN |
| cg21281951 | 0.698   | 0.201   | 0.497     | 1e-08            | HIST1H3G_HIST1H2BI    | Hypermethylated in FP vs FN |
| cg12204258 | 0.760   | 0.379   | 0.381     | 1e-08            | NA                    | Hypermethylated in FP vs FN |
| cg05377949 | 0.760   | 0.351   | 0.409     | 1e-08            | NA                    | Hypermethylated in FP vs FN |
| cg10634136 | 0.661   | 0.338   | 0.323     | 1e-08            | FZD7                  | Hypermethylated in FP vs FN |
| cg04804648 | 0.538   | 0.127   | 0.411     | 1e-08            | NA                    | Hypermethylated in FP vs FN |
| cg27558693 | 0.526   | 0.182   | 0.344     | 1e-08            | NA                    | Hypermethylated in FP vs FN |
| cg09646593 | 0.852   | 0.529   | 0.323     | 1e-08            | NA                    | Hypermethylated in FP vs FN |
| cg07599786 | 0.585   | 0.244   | 0.341     | 1e-08            | NA                    | Hypermethylated in FP vs FN |
| cg26924496 | 0.504   | 0.098   | 0.406     | 1e-08            | NTF3                  | Hypermethylated in FP vs FN |

### Supplementary Table 7 (continued)

| Probe      | FP.mean | FN.mean | Mean.diff | Adjusted.P.value | Promoter.related.gene | Category                    |
|------------|---------|---------|-----------|------------------|-----------------------|-----------------------------|
| cg19762747 | 0.449   | 0.187   | 0.261     | 1e-08            | CRX                   | Hypermethylated in FP vs FN |
| cg11009590 | 0.770   | 0.418   | 0.352     | 1e-08            | NA                    | Hypermethylated in FP vs FN |
| cg13808936 | 0.776   | 0.437   | 0.339     | 1e-08            | NA                    | Hypermethylated in FP vs FN |
| cg05208416 | 0.619   | 0.343   | 0.276     | 1e-08            | NA                    | Hypermethylated in FP vs FN |
| cg25607321 | 0.419   | 0.103   | 0.316     | 1e-08            | NAV2                  | Hypermethylated in FP vs FN |
| cg24748769 | 0.704   | 0.234   | 0.470     | 1e-08            | NA                    | Hypermethylated in FP vs FN |
| cg07525420 | 0.405   | 0.153   | 0.252     | 1e-08            | NA                    | Hypermethylated in FP vs FN |
| cg16071713 | 0.471   | 0.220   | 0.251     | 1e-08            | C21orf96              | Hypermethylated in FP vs FN |
| cg24931713 | 0.787   | 0.449   | 0.337     | 1e-08            | NA                    | Hypermethylated in FP vs FN |
| cg11996592 | 0.834   | 0.555   | 0.279     | 1e-08            | NA                    | Hypermethylated in FP vs FN |
| cg21541159 | 0.699   | 0.373   | 0.326     | 1e-08            | NA                    | Hypermethylated in FP vs FN |
| cg22127309 | 0.739   | 0.474   | 0.265     | 1e-08            | NA                    | Hypermethylated in FP vs FN |
| cg05269784 | 0.689   | 0.360   | 0.329     | 1e-08            | NA                    | Hypermethylated in FP vs FN |
| cg10593400 | 0.810   | 0.417   | 0.393     | 1e-08            | DDAH1                 | Hypermethylated in FP vs FN |
| cg10864794 | 0.822   | 0.424   | 0.398     | 1e-08            | NA                    | Hypermethylated in FP vs FN |
| cg23344257 | 0.423   | 0.086   | 0.336     | 1e-08            | RBMS3                 | Hypermethylated in FP vs FN |
| cg27409974 | 0.831   | 0.503   | 0.328     | 1e-08            | NA                    | Hypermethylated in FP vs FN |
| cg14041855 | 0.738   | 0.303   | 0.435     | 2e-08            | NA                    | Hypermethylated in FP vs FN |
| cg07072704 | 0.636   | 0.241   | 0.395     | 2e-08            | NA                    | Hypermethylated in FP vs FN |
| cg27030482 | 0.700   | 0.299   | 0.401     | 2e-08            | NA                    | Hypermethylated in FP vs FN |
| cg02085660 | 0.664   | 0.372   | 0.292     | 2e-08            | NA                    | Hypermethylated in FP vs FN |
| cg18696900 | 0.641   | 0.285   | 0.356     | 2e-08            | FERMT2                | Hypermethylated in FP vs FN |
| cg18610978 | 0.875   | 0.605   | 0.270     | 2e-08            | LOC151162             | Hypermethylated in FP vs FN |
| cg23233200 | 0.752   | 0.204   | 0.548     | 2e-08            | HIST1H3G_HIST1H2BI    | Hypermethylated in FP vs FN |
| cg07141504 | 0.522   | 0.175   | 0.347     | 2e-08            | LOC100131551          | Hypermethylated in FP vs FN |

### Supplementary Table 7 (continued)

| Probe      | FP.mean | FN.mean | Mean.diff | Adjusted.P.value | Promoter.related.gene | Category                    |
|------------|---------|---------|-----------|------------------|-----------------------|-----------------------------|
| cg27543538 | 0.636   | 0.309   | 0.327     | 2e-08            | NA                    | Hypermethylated in FP vs FN |
| cg25054821 | 0.847   | 0.449   | 0.398     | 2e-08            | NA                    | Hypermethylated in FP vs FN |
| cg16636756 | 0.484   | 0.213   | 0.271     | 2e-08            | NA                    | Hypermethylated in FP vs FN |
| cg09624466 | 0.833   | 0.345   | 0.488     | 2e-08            | OTX2OS1               | Hypermethylated in FP vs FN |
| cg08976995 | 0.770   | 0.333   | 0.437     | 2e-08            | NA                    | Hypermethylated in FP vs FN |
| cg16608018 | 0.608   | 0.226   | 0.383     | 2e-08            | NA                    | Hypermethylated in FP vs FN |
| cg07461837 | 0.683   | 0.431   | 0.253     | 2e-08            | PYCARD                | Hypermethylated in FP vs FN |
| cg10512745 | 0.663   | 0.120   | 0.543     | 2e-08            | NA                    | Hypermethylated in FP vs FN |
| cg13978347 | 0.834   | 0.402   | 0.432     | 2e-08            | NA                    | Hypermethylated in FP vs FN |
| cg25347264 | 0.586   | 0.142   | 0.444     | 2e-08            | NTF3                  | Hypermethylated in FP vs FN |
| cg16352830 | 0.735   | 0.327   | 0.408     | 2e-08            | NA                    | Hypermethylated in FP vs FN |
| cg27200630 | 0.603   | 0.221   | 0.382     | 2e-08            | NA                    | Hypermethylated in FP vs FN |
| cg18067847 | 0.610   | 0.178   | 0.433     | 2e-08            | DYSF                  | Hypermethylated in FP vs FN |
| cg00912738 | 0.753   | 0.366   | 0.387     | 2e-08            | NA                    | Hypermethylated in FP vs FN |
| cg16705777 | 0.806   | 0.525   | 0.281     | 2e-08            | NA                    | Hypermethylated in FP vs FN |
| cg05544807 | 0.656   | 0.338   | 0.318     | 2e-08            | DNMT3A                | Hypermethylated in FP vs FN |
| cg08208317 | 0.586   | 0.220   | 0.365     | 2e-08            | NA                    | Hypermethylated in FP vs FN |
| cg11807040 | 0.765   | 0.449   | 0.316     | 2e-08            | NA                    | Hypermethylated in FP vs FN |
| cg23566503 | 0.722   | 0.287   | 0.435     | 2e-08            | NNAT                  | Hypermethylated in FP vs FN |
| cg14273822 | 0.720   | 0.237   | 0.483     | 2e-08            | HIST1H3G_HIST1H2BI    | Hypermethylated in FP vs FN |
| cg23815825 | 0.722   | 0.325   | 0.398     | 2e-08            | NA                    | Hypermethylated in FP vs FN |
| cg07519485 | 0.687   | 0.435   | 0.252     | 2e-08            | NA                    | Hypermethylated in FP vs FN |
| cg10278915 | 0.835   | 0.450   | 0.385     | 2e-08            | NA                    | Hypermethylated in FP vs FN |
| cg15411034 | 0.800   | 0.468   | 0.332     | 2e-08            | NA                    | Hypermethylated in FP vs FN |
| cg25938803 | 0.828   | 0.516   | 0.312     | 2e-08            | NA                    | Hypermethylated in FP vs FN |

### Supplementary Table 7 (continued)

| Probe      | FP.mean | FN.mean | Mean.diff | Adjusted.P.value | Promoter.related.gene | Category                    |
|------------|---------|---------|-----------|------------------|-----------------------|-----------------------------|
| cg02353814 | 0.928   | 0.576   | 0.352     | 2e-08            | NA                    | Hypermethylated in FP vs FN |
| cg01493678 | 0.764   | 0.420   | 0.344     | 2e-08            | HLA-DOB               | Hypermethylated in FP vs FN |
| cg00465247 | 0.743   | 0.409   | 0.334     | 2e-08            | NA                    | Hypermethylated in FP vs FN |
| cg18566883 | 0.757   | 0.405   | 0.352     | 2e-08            | NA                    | Hypermethylated in FP vs FN |
| cg15992347 | 0.532   | 0.193   | 0.339     | 2e-08            | CCDC83                | Hypermethylated in FP vs FN |
| cg12446088 | 0.800   | 0.486   | 0.314     | 2e-08            | NA                    | Hypermethylated in FP vs FN |
| cg15952840 | 0.760   | 0.388   | 0.371     | 2e-08            | NA                    | Hypermethylated in FP vs FN |
| cg19420129 | 0.621   | 0.259   | 0.362     | 2e-08            | NA                    | Hypermethylated in FP vs FN |
| cg21301440 | 0.521   | 0.200   | 0.321     | 2e-08            | CYGB                  | Hypermethylated in FP vs FN |
| cg00089823 | 0.477   | 0.160   | 0.317     | 2e-08            | NA                    | Hypermethylated in FP vs FN |
| cg11172682 | 0.803   | 0.524   | 0.279     | 2e-08            | NA                    | Hypermethylated in FP vs FN |
| cg14613164 | 0.825   | 0.497   | 0.329     | 2e-08            | NA                    | Hypermethylated in FP vs FN |
| cg18399183 | 0.550   | 0.299   | 0.251     | 2e-08            | METTL7A               | Hypermethylated in FP vs FN |
| cg26135388 | 0.729   | 0.345   | 0.385     | 2e-08            | NA                    | Hypermethylated in FP vs FN |
| cg01782711 | 0.753   | 0.419   | 0.334     | 2e-08            | NA                    | Hypermethylated in FP vs FN |
| cg24250374 | 0.775   | 0.389   | 0.386     | 2e-08            | NA                    | Hypermethylated in FP vs FN |
| cg09641077 | 0.695   | 0.216   | 0.480     | 2e-08            | ARHGEF3               | Hypermethylated in FP vs FN |
| cg16874930 | 0.604   | 0.268   | 0.337     | 2e-08            | NA                    | Hypermethylated in FP vs FN |
| cg08065733 | 0.647   | 0.354   | 0.293     | 2e-08            | NA                    | Hypermethylated in FP vs FN |
| cg04273299 | 0.759   | 0.401   | 0.359     | 2e-08            | NA                    | Hypermethylated in FP vs FN |
| cg23561979 | 0.736   | 0.295   | 0.441     | 2e-08            | NA                    | Hypermethylated in FP vs FN |
| cg12737938 | 0.622   | 0.269   | 0.353     | 2e-08            | NA                    | Hypermethylated in FP vs FN |
| cg02718078 | 0.760   | 0.344   | 0.415     | 2e-08            | NA                    | Hypermethylated in FP vs FN |
| cg07138437 | 0.715   | 0.337   | 0.378     | 2e-08            | NA                    | Hypermethylated in FP vs FN |
| cg07541559 | 0.705   | 0.357   | 0.348     | 2e-08            | NA                    | Hypermethylated in FP vs FN |



### Supplementary Table 7 (continued)

| Probe      | FP.mean | FN.mean | Mean.diff | Adjusted.P.value | Promoter.related.gene | Category                    |
|------------|---------|---------|-----------|------------------|-----------------------|-----------------------------|
| cg07879671 | 0.656   | 0.286   | 0.370     | 2e-08            | NA                    | Hypermethylated in FP vs FN |
| cg02119693 | 0.747   | 0.419   | 0.327     | 2e-08            | NA                    | Hypermethylated in FP vs FN |
| cg26950947 | 0.846   | 0.491   | 0.355     | 2e-08            | NA                    | Hypermethylated in FP vs FN |
| cg16606347 | 0.721   | 0.381   | 0.340     | 2e-08            | NA                    | Hypermethylated in FP vs FN |
| cg16650073 | 0.654   | 0.293   | 0.361     | 2e-08            | NA                    | Hypermethylated in FP vs FN |
| cg23477348 | 0.627   | 0.304   | 0.324     | 2e-08            | NA                    | Hypermethylated in FP vs FN |
| cg10604373 | 0.720   | 0.304   | 0.416     | 2e-08            | NA                    | Hypermethylated in FP vs FN |
| cg00476653 | 0.828   | 0.536   | 0.293     | 2e-08            | NA                    | Hypermethylated in FP vs FN |
| cg00036011 | 0.758   | 0.231   | 0.528     | 2e-08            | HIST1H3G_HIST1H2BI    | Hypermethylated in FP vs FN |
| cg15605858 | 0.816   | 0.301   | 0.516     | 2e-08            | NA                    | Hypermethylated in FP vs FN |
| cg10500737 | 0.650   | 0.315   | 0.335     | 2e-08            | C21orf34              | Hypermethylated in FP vs FN |
| cg23304023 | 0.599   | 0.205   | 0.394     | 2e-08            | NA                    | Hypermethylated in FP vs FN |
| cg27340749 | 0.522   | 0.162   | 0.361     | 2e-08            | TREX1                 | Hypermethylated in FP vs FN |
| cg15155463 | 0.641   | 0.237   | 0.403     | 2e-08            | DYSF                  | Hypermethylated in FP vs FN |
| cg21521518 | 0.584   | 0.261   | 0.323     | 2e-08            | RASL11B               | Hypermethylated in FP vs FN |
| cg08223003 | 0.716   | 0.429   | 0.288     | 2e-08            | NA                    | Hypermethylated in FP vs FN |
| cg05928537 | 0.688   | 0.429   | 0.259     | 2e-08            | NA                    | Hypermethylated in FP vs FN |
| cg15390816 | 0.774   | 0.446   | 0.328     | 2e-08            | NA                    | Hypermethylated in FP vs FN |
| cg23226688 | 0.766   | 0.498   | 0.268     | 2e-08            | NA                    | Hypermethylated in FP vs FN |
| cg09692335 | 0.367   | 0.097   | 0.270     | 2e-08            | TREX1                 | Hypermethylated in FP vs FN |
| cg20597619 | 0.809   | 0.456   | 0.353     | 2e-08            | NA                    | Hypermethylated in FP vs FN |
| cg23310345 | 0.770   | 0.398   | 0.372     | 2e-08            | NA                    | Hypermethylated in FP vs FN |
| cg04678623 | 0.706   | 0.319   | 0.387     | 2e-08            | NA                    | Hypermethylated in FP vs FN |
| cg03967266 | 0.799   | 0.444   | 0.355     | 2e-08            | NA                    | Hypermethylated in FP vs FN |
| cg21190644 | 0.796   | 0.528   | 0.267     | 2e-08            | NA                    | Hypermethylated in FP vs FN |

### Supplementary Table 7 (continued)

| Probe      | FP.mean | FN.mean | Mean.diff | Adjusted.P.value | Promoter.related.gene | Category                    |
|------------|---------|---------|-----------|------------------|-----------------------|-----------------------------|
| cg15317049 | 0.763   | 0.444   | 0.319     | 2e-08            | NA                    | Hypermethylated in FP vs FN |
| cg20095124 | 0.690   | 0.193   | 0.497     | 2e-08            | NA                    | Hypermethylated in FP vs FN |
| cg16554941 | 0.643   | 0.304   | 0.339     | 2e-08            | NA                    | Hypermethylated in FP vs FN |
| cg21609804 | 0.838   | 0.513   | 0.325     | 2e-08            | NA                    | Hypermethylated in FP vs FN |
| cg19589277 | 0.776   | 0.387   | 0.389     | 2e-08            | NA                    | Hypermethylated in FP vs FN |
| cg25048985 | 0.763   | 0.378   | 0.386     | 2e-08            | NA                    | Hypermethylated in FP vs FN |
| cg03170698 | 0.629   | 0.144   | 0.485     | 2e-08            | DYSF                  | Hypermethylated in FP vs FN |
| cg11756095 | 0.478   | 0.145   | 0.333     | 2e-08            | NA                    | Hypermethylated in FP vs FN |
| cg05577437 | 0.828   | 0.458   | 0.370     | 2e-08            | NA                    | Hypermethylated in FP vs FN |
| cg13817905 | 0.815   | 0.563   | 0.252     | 2e-08            | NA                    | Hypermethylated in FP vs FN |
| cg21406967 | 0.595   | 0.254   | 0.341     | 2e-08            | TRIP6                 | Hypermethylated in FP vs FN |
| cg09048129 | 0.665   | 0.279   | 0.386     | 2e-08            | USP2                  | Hypermethylated in FP vs FN |
| cg24812143 | 0.796   | 0.351   | 0.444     | 2e-08            | NA                    | Hypermethylated in FP vs FN |
| cg14401746 | 0.598   | 0.247   | 0.350     | 2e-08            | NA                    | Hypermethylated in FP vs FN |
| cg18677603 | 0.477   | 0.188   | 0.289     | 2e-08            | LOC100131551          | Hypermethylated in FP vs FN |
| cg01525498 | 0.772   | 0.375   | 0.397     | 2e-08            | NA                    | Hypermethylated in FP vs FN |
| cg14750948 | 0.799   | 0.281   | 0.518     | 2e-08            | NA                    | Hypermethylated in FP vs FN |
| cg12669271 | 0.657   | 0.324   | 0.333     | 2e-08            | NA                    | Hypermethylated in FP vs FN |
| cg11816841 | 0.669   | 0.125   | 0.544     | 2e-08            | NA                    | Hypermethylated in FP vs FN |
| cg11174847 | 0.816   | 0.366   | 0.450     | 2e-08            | NNAT                  | Hypermethylated in FP vs FN |
| cg02148270 | 0.771   | 0.422   | 0.349     | 2e-08            | NA                    | Hypermethylated in FP vs FN |
| cg09969043 | 0.512   | 0.174   | 0.338     | 2e-08            | NR2F2                 | Hypermethylated in FP vs FN |
| cg08540829 | 0.759   | 0.467   | 0.292     | 2e-08            | MIR609                | Hypermethylated in FP vs FN |
| cg16639860 | 0.852   | 0.554   | 0.298     | 3e-08            | KCNIP4                | Hypermethylated in FP vs FN |
| cg01941278 | 0.817   | 0.521   | 0.295     | 3e-08            | NA                    | Hypermethylated in FP vs FN |

### Supplementary Table 7 (continued)

| Probe      | FP.mean | FN.mean | Mean.diff | Adjusted.P.value | Promoter.related.gene | Category                    |
|------------|---------|---------|-----------|------------------|-----------------------|-----------------------------|
| cg03301084 | 0.606   | 0.213   | 0.392     | 3e-08            | NA                    | Hypermethylated in FP vs FN |
| cg07556789 | 0.783   | 0.372   | 0.412     | 3e-08            | NA                    | Hypermethylated in FP vs FN |
| cg27108984 | 0.763   | 0.347   | 0.417     | 3e-08            | NA                    | Hypermethylated in FP vs FN |
| cg25909064 | 0.703   | 0.346   | 0.356     | 3e-08            | NA                    | Hypermethylated in FP vs FN |
| cg02867216 | 0.835   | 0.486   | 0.349     | 3e-08            | NA                    | Hypermethylated in FP vs FN |
| cg07018404 | 0.621   | 0.234   | 0.388     | 3e-08            | NA                    | Hypermethylated in FP vs FN |
| cg13804575 | 0.667   | 0.394   | 0.274     | 3e-08            | NA                    | Hypermethylated in FP vs FN |
| cg20510012 | 0.776   | 0.507   | 0.268     | 3e-08            | PHLDB1                | Hypermethylated in FP vs FN |
| cg07892412 | 0.827   | 0.492   | 0.335     | 3e-08            | NA                    | Hypermethylated in FP vs FN |
| cg17742459 | 0.810   | 0.545   | 0.265     | 3e-08            | NA                    | Hypermethylated in FP vs FN |
| cg22700246 | 0.806   | 0.471   | 0.335     | 3e-08            | NA                    | Hypermethylated in FP vs FN |
| cg11762306 | 0.479   | 0.178   | 0.301     | 3e-08            | NA                    | Hypermethylated in FP vs FN |
| cg07691686 | 0.714   | 0.433   | 0.281     | 3e-08            | NA                    | Hypermethylated in FP vs FN |
| cg16598600 | 0.530   | 0.146   | 0.384     | 3e-08            | NA                    | Hypermethylated in FP vs FN |
| cg01591938 | 0.731   | 0.266   | 0.464     | 3e-08            | NA                    | Hypermethylated in FP vs FN |
| cg07229001 | 0.743   | 0.400   | 0.343     | 3e-08            | NA                    | Hypermethylated in FP vs FN |
| cg11863854 | 0.762   | 0.436   | 0.326     | 3e-08            | NA                    | Hypermethylated in FP vs FN |
| cg21919719 | 0.477   | 0.209   | 0.267     | 3e-08            | NA                    | Hypermethylated in FP vs FN |
| cg10588135 | 0.434   | 0.180   | 0.255     | 3e-08            | NA                    | Hypermethylated in FP vs FN |
| cg18910298 | 0.626   | 0.299   | 0.327     | 3e-08            | NA                    | Hypermethylated in FP vs FN |
| cg15543045 | 0.743   | 0.400   | 0.343     | 3e-08            | NA                    | Hypermethylated in FP vs FN |
| cg09269945 | 0.763   | 0.468   | 0.295     | 3e-08            | NA                    | Hypermethylated in FP vs FN |
| cg00059399 | 0.521   | 0.203   | 0.318     | 3e-08            | NA                    | Hypermethylated in FP vs FN |
| cg14157578 | 0.780   | 0.444   | 0.336     | 3e-08            | NA                    | Hypermethylated in FP vs FN |
| cg10688297 | 0.697   | 0.281   | 0.416     | 3e-08            | NA                    | Hypermethylated in FP vs FN |

### Supplementary Table 7 (continued)

| Probe      | FP.mean | FN.mean | Mean.diff | Adjusted.P.value | Promoter.related.gene | Category                    |
|------------|---------|---------|-----------|------------------|-----------------------|-----------------------------|
| cg05783135 | 0.795   | 0.401   | 0.394     | 3e-08            | NA                    | Hypermethylated in FP vs FN |
| cg06293872 | 0.729   | 0.404   | 0.324     | 3e-08            | NA                    | Hypermethylated in FP vs FN |
| cg01332683 | 0.671   | 0.337   | 0.335     | 3e-08            | NA                    | Hypermethylated in FP vs FN |
| cg11149163 | 0.674   | 0.315   | 0.360     | 3e-08            | NA                    | Hypermethylated in FP vs FN |
| cg18539086 | 0.775   | 0.468   | 0.307     | 3e-08            | NA                    | Hypermethylated in FP vs FN |
| cg23097402 | 0.712   | 0.282   | 0.431     | 3e-08            | NA                    | Hypermethylated in FP vs FN |
| cg08010865 | 0.650   | 0.283   | 0.367     | 3e-08            | NA                    | Hypermethylated in FP vs FN |
| cg06465011 | 0.696   | 0.363   | 0.333     | 3e-08            | NA                    | Hypermethylated in FP vs FN |
| cg05693530 | 0.684   | 0.431   | 0.253     | 3e-08            | NA                    | Hypermethylated in FP vs FN |
| cg25027367 | 0.705   | 0.407   | 0.298     | 3e-08            | NA                    | Hypermethylated in FP vs FN |
| cg20618695 | 0.529   | 0.208   | 0.321     | 3e-08            | NA                    | Hypermethylated in FP vs FN |
| cg10319942 | 0.865   | 0.509   | 0.356     | 3e-08            | NA                    | Hypermethylated in FP vs FN |
| cg01804925 | 0.660   | 0.286   | 0.374     | 3e-08            | NA                    | Hypermethylated in FP vs FN |
| cg13916885 | 0.461   | 0.175   | 0.286     | 3e-08            | NA                    | Hypermethylated in FP vs FN |
| cg19269749 | 0.751   | 0.425   | 0.327     | 3e-08            | NA                    | Hypermethylated in FP vs FN |
| cg01792229 | 0.842   | 0.571   | 0.272     | 3e-08            | NA                    | Hypermethylated in FP vs FN |
| cg26995224 | 0.689   | 0.267   | 0.422     | 3e-08            | NA                    | Hypermethylated in FP vs FN |
| cg15153383 | 0.423   | 0.122   | 0.301     | 3e-08            | NA                    | Hypermethylated in FP vs FN |
| cg13694343 | 0.616   | 0.224   | 0.392     | 3e-08            | NA                    | Hypermethylated in FP vs FN |
| cg20133730 | 0.570   | 0.196   | 0.374     | 3e-08            | PDK2                  | Hypermethylated in FP vs FN |
| cg07191030 | 0.648   | 0.315   | 0.333     | 3e-08            | NA                    | Hypermethylated in FP vs FN |
| cg12756396 | 0.564   | 0.152   | 0.413     | 3e-08            | NA                    | Hypermethylated in FP vs FN |
| cg04603812 | 0.484   | 0.094   | 0.390     | 3e-08            | NA                    | Hypermethylated in FP vs FN |
| cg25406989 | 0.640   | 0.230   | 0.411     | 3e-08            | NA                    | Hypermethylated in FP vs FN |
| cg03639671 | 0.652   | 0.247   | 0.406     | 3e-08            | NA                    | Hypermethylated in FP vs FN |

### Supplementary Table 7 (continued)

| Probe      | FP.mean | FN.mean | Mean.diff | Adjusted.P.value | Promoter.related.gene | Category                    |
|------------|---------|---------|-----------|------------------|-----------------------|-----------------------------|
| cg19805953 | 0.449   | 0.179   | 0.270     | 3e-08            | EMP3                  | Hypermethylated in FP vs FN |
| cg22655696 | 0.600   | 0.190   | 0.410     | 3e-08            | NA                    | Hypermethylated in FP vs FN |
| cg09278789 | 0.874   | 0.551   | 0.323     | 3e-08            | NA                    | Hypermethylated in FP vs FN |
| cg26411747 | 0.628   | 0.265   | 0.363     | 3e-08            | NA                    | Hypermethylated in FP vs FN |
| cg26874282 | 0.736   | 0.362   | 0.374     | 3e-08            | NA                    | Hypermethylated in FP vs FN |
| cg04777726 | 0.668   | 0.209   | 0.459     | 3e-08            | HSD17B14              | Hypermethylated in FP vs FN |
| cg07260003 | 0.722   | 0.435   | 0.287     | 3e-08            | NA                    | Hypermethylated in FP vs FN |
| cg22864689 | 0.675   | 0.318   | 0.357     | 3e-08            | NA                    | Hypermethylated in FP vs FN |
| cg25322632 | 0.796   | 0.522   | 0.274     | 3e-08            | NA                    | Hypermethylated in FP vs FN |
| cg26293590 | 0.663   | 0.365   | 0.298     | 3e-08            | NA                    | Hypermethylated in FP vs FN |
| cg02372856 | 0.828   | 0.485   | 0.342     | 3e-08            | NA                    | Hypermethylated in FP vs FN |
| cg09309208 | 0.799   | 0.395   | 0.404     | 3e-08            | NA                    | Hypermethylated in FP vs FN |
| cg01563704 | 0.733   | 0.208   | 0.525     | 3e-08            | HIST1H3G_HIST1H2BI    | Hypermethylated in FP vs FN |
| cg05317605 | 0.657   | 0.249   | 0.408     | 3e-08            | SEMA6B                | Hypermethylated in FP vs FN |
| cg07296387 | 0.738   | 0.356   | 0.382     | 3e-08            | NA                    | Hypermethylated in FP vs FN |
| cg13393917 | 0.790   | 0.517   | 0.273     | 3e-08            | OLFML3                | Hypermethylated in FP vs FN |
| cg22711792 | 0.608   | 0.163   | 0.445     | 3e-08            | NA                    | Hypermethylated in FP vs FN |
| cg15308737 | 0.837   | 0.543   | 0.294     | 3e-08            | NA                    | Hypermethylated in FP vs FN |
| cg02275035 | 0.675   | 0.354   | 0.321     | 3e-08            | NA                    | Hypermethylated in FP vs FN |
| cg21122199 | 0.691   | 0.329   | 0.362     | 3e-08            | C17orf64              | Hypermethylated in FP vs FN |
| cg03972071 | 0.741   | 0.236   | 0.505     | 3e-08            | NA                    | Hypermethylated in FP vs FN |
| cg11328436 | 0.706   | 0.290   | 0.417     | 3e-08            | NA                    | Hypermethylated in FP vs FN |
| cg25492583 | 0.575   | 0.222   | 0.353     | 3e-08            | NA                    | Hypermethylated in FP vs FN |
| cg25142028 | 0.724   | 0.443   | 0.280     | 3e-08            | NA                    | Hypermethylated in FP vs FN |
| cg05214460 | 0.493   | 0.210   | 0.283     | 3e-08            | ADD3                  | Hypermethylated in FP vs FN |

### Supplementary Table 7 (continued)

| Probe      | FP.mean | FN.mean | Mean.diff | Adjusted.P.value | Promoter.related.gene | Category                    |
|------------|---------|---------|-----------|------------------|-----------------------|-----------------------------|
| cg17314520 | 0.764   | 0.461   | 0.303     | 3e-08            | NA                    | Hypermethylated in FP vs FN |
| cg08329931 | 0.656   | 0.366   | 0.291     | 3e-08            | NA                    | Hypermethylated in FP vs FN |
| cg13148544 | 0.712   | 0.306   | 0.406     | 4e-08            | NA                    | Hypermethylated in FP vs FN |
| cg00462951 | 0.699   | 0.284   | 0.414     | 4e-08            | NA                    | Hypermethylated in FP vs FN |
| cg26949612 | 0.701   | 0.368   | 0.332     | 4e-08            | NA                    | Hypermethylated in FP vs FN |
| cg07391913 | 0.771   | 0.414   | 0.357     | 4e-08            | NA                    | Hypermethylated in FP vs FN |
| cg09790628 | 0.844   | 0.570   | 0.275     | 4e-08            | NA                    | Hypermethylated in FP vs FN |
| cg05258123 | 0.790   | 0.508   | 0.281     | 4e-08            | NA                    | Hypermethylated in FP vs FN |
| cg02727484 | 0.680   | 0.372   | 0.308     | 4e-08            | NA                    | Hypermethylated in FP vs FN |
| cg06746744 | 0.706   | 0.370   | 0.336     | 4e-08            | SEMA6B                | Hypermethylated in FP vs FN |
| cg25555549 | 0.826   | 0.455   | 0.372     | 4e-08            | NA                    | Hypermethylated in FP vs FN |
| cg08993878 | 0.830   | 0.526   | 0.305     | 4e-08            | NA                    | Hypermethylated in FP vs FN |
| cg05783185 | 0.505   | 0.228   | 0.277     | 4e-08            | NA                    | Hypermethylated in FP vs FN |
| cg04399631 | 0.753   | 0.375   | 0.378     | 4e-08            | NA                    | Hypermethylated in FP vs FN |
| cg03221025 | 0.696   | 0.414   | 0.282     | 4e-08            | NA                    | Hypermethylated in FP vs FN |
| cg26180015 | 0.464   | 0.199   | 0.265     | 4e-08            | NA                    | Hypermethylated in FP vs FN |
| cg16955336 | 0.511   | 0.249   | 0.262     | 4e-08            | NA                    | Hypermethylated in FP vs FN |
| cg13284741 | 0.718   | 0.355   | 0.363     | 4e-08            | NA                    | Hypermethylated in FP vs FN |
| cg20632462 | 0.885   | 0.624   | 0.261     | 4e-08            | NA                    | Hypermethylated in FP vs FN |
| cg18425032 | 0.800   | 0.507   | 0.293     | 4e-08            | NA                    | Hypermethylated in FP vs FN |
| cg04694991 | 0.782   | 0.411   | 0.371     | 4e-08            | NA                    | Hypermethylated in FP vs FN |
| cg09318508 | 0.575   | 0.151   | 0.424     | 4e-08            | DYSF                  | Hypermethylated in FP vs FN |
| cg14469436 | 0.660   | 0.375   | 0.285     | 4e-08            | NA                    | Hypermethylated in FP vs FN |
| cg08847173 | 0.876   | 0.348   | 0.528     | 4e-08            | NA                    | Hypermethylated in FP vs FN |
| cg03517250 | 0.743   | 0.462   | 0.281     | 4e-08            | NA                    | Hypermethylated in FP vs FN |

### Supplementary Table 7 (continued)

| Probe      | FP.mean | FN.mean | Mean.diff | Adjusted.P.value | Promoter.related.gene | Category                    |
|------------|---------|---------|-----------|------------------|-----------------------|-----------------------------|
| cg11469594 | 0.647   | 0.314   | 0.334     | 4e-08            | NA                    | Hypermethylated in FP vs FN |
| cg16909660 | 0.786   | 0.449   | 0.336     | 4e-08            | NA                    | Hypermethylated in FP vs FN |
| cg07888884 | 0.679   | 0.370   | 0.309     | 4e-08            | NA                    | Hypermethylated in FP vs FN |
| cg05027533 | 0.849   | 0.563   | 0.286     | 4e-08            | NA                    | Hypermethylated in FP vs FN |
| cg13276580 | 0.661   | 0.319   | 0.342     | 4e-08            | NA                    | Hypermethylated in FP vs FN |
| cg09789721 | 0.722   | 0.405   | 0.317     | 4e-08            | NA                    | Hypermethylated in FP vs FN |
| cg19062108 | 0.577   | 0.265   | 0.312     | 4e-08            | NA                    | Hypermethylated in FP vs FN |
| cg27294837 | 0.613   | 0.277   | 0.337     | 4e-08            | POU4F1                | Hypermethylated in FP vs FN |
| cg14677296 | 0.669   | 0.398   | 0.270     | 4e-08            | NA                    | Hypermethylated in FP vs FN |
| cg09664215 | 0.849   | 0.439   | 0.410     | 4e-08            | NA                    | Hypermethylated in FP vs FN |
| cg18252424 | 0.801   | 0.443   | 0.357     | 4e-08            | NA                    | Hypermethylated in FP vs FN |
| cg02844593 | 0.764   | 0.491   | 0.272     | 4e-08            | NA                    | Hypermethylated in FP vs FN |
| cg13724379 | 0.503   | 0.098   | 0.406     | 4e-08            | NA                    | Hypermethylated in FP vs FN |
| cg04931216 | 0.558   | 0.161   | 0.397     | 4e-08            | NA                    | Hypermethylated in FP vs FN |
| cg06159340 | 0.739   | 0.316   | 0.423     | 4e-08            | CTF1                  | Hypermethylated in FP vs FN |
| cg11767757 | 0.590   | 0.213   | 0.377     | 4e-08            | NCRNA00114            | Hypermethylated in FP vs FN |
| cg10866445 | 0.813   | 0.516   | 0.297     | 4e-08            | NA                    | Hypermethylated in FP vs FN |
| cg26551865 | 0.624   | 0.331   | 0.293     | 4e-08            | NA                    | Hypermethylated in FP vs FN |
| cg17163767 | 0.570   | 0.315   | 0.255     | 4e-08            | NA                    | Hypermethylated in FP vs FN |
| cg02854937 | 0.565   | 0.301   | 0.264     | 4e-08            | NA                    | Hypermethylated in FP vs FN |
| cg16331674 | 0.835   | 0.470   | 0.365     | 4e-08            | NA                    | Hypermethylated in FP vs FN |
| cg19199590 | 0.737   | 0.477   | 0.260     | 4e-08            | LRRN4CL               | Hypermethylated in FP vs FN |
| cg17288471 | 0.544   | 0.267   | 0.277     | 4e-08            | NA                    | Hypermethylated in FP vs FN |
| cg10570941 | 0.689   | 0.332   | 0.357     | 4e-08            | HIST1H3G_HIST1H2BI    | Hypermethylated in FP vs FN |
| cg14128315 | 0.731   | 0.466   | 0.266     | 4e-08            | NA                    | Hypermethylated in FP vs FN |

### Supplementary Table 7 (continued)

| Probe      | FP.mean | FN.mean | Mean.diff | Adjusted.P.value | Promoter.related.gene | Category                    |
|------------|---------|---------|-----------|------------------|-----------------------|-----------------------------|
| cg25864762 | 0.763   | 0.376   | 0.386     | 4e-08            | NA                    | Hypermethylated in FP vs FN |
| cg03441710 | 0.823   | 0.492   | 0.331     | 4e-08            | NA                    | Hypermethylated in FP vs FN |
| cg02161478 | 0.694   | 0.251   | 0.444     | 4e-08            | OTX2OS1               | Hypermethylated in FP vs FN |
| cg03053456 | 0.698   | 0.391   | 0.307     | 4e-08            | NA                    | Hypermethylated in FP vs FN |
| cg13448468 | 0.753   | 0.440   | 0.313     | 4e-08            | NA                    | Hypermethylated in FP vs FN |
| cg18773617 | 0.880   | 0.514   | 0.366     | 4e-08            | NA                    | Hypermethylated in FP vs FN |
| cg25540854 | 0.796   | 0.481   | 0.315     | 4e-08            | NA                    | Hypermethylated in FP vs FN |
| cg19457909 | 0.834   | 0.539   | 0.295     | 4e-08            | NA                    | Hypermethylated in FP vs FN |
| cg05388880 | 0.782   | 0.376   | 0.406     | 4e-08            | NA                    | Hypermethylated in FP vs FN |
| cg10012530 | 0.783   | 0.530   | 0.253     | 4e-08            | NA                    | Hypermethylated in FP vs FN |
| cg13279476 | 0.629   | 0.316   | 0.313     | 4e-08            | NA                    | Hypermethylated in FP vs FN |
| cg03018496 | 0.712   | 0.316   | 0.396     | 4e-08            | NR2F2                 | Hypermethylated in FP vs FN |
| cg14740554 | 0.663   | 0.304   | 0.360     | 4e-08            | NA                    | Hypermethylated in FP vs FN |
| cg13120096 | 0.823   | 0.514   | 0.309     | 4e-08            | NA                    | Hypermethylated in FP vs FN |
| cg06577223 | 0.714   | 0.313   | 0.401     | 4e-08            | NA                    | Hypermethylated in FP vs FN |
| cg00845245 | 0.770   | 0.463   | 0.307     | 4e-08            | NA                    | Hypermethylated in FP vs FN |
| cg12729800 | 0.848   | 0.579   | 0.269     | 5e-08            | NA                    | Hypermethylated in FP vs FN |
| cg04502852 | 0.746   | 0.436   | 0.310     | 5e-08            | NA                    | Hypermethylated in FP vs FN |
| cg25066772 | 0.588   | 0.276   | 0.312     | 5e-08            | NA                    | Hypermethylated in FP vs FN |
| cg20011352 | 0.442   | 0.130   | 0.311     | 5e-08            | NA                    | Hypermethylated in FP vs FN |
| cg04838832 | 0.557   | 0.255   | 0.301     | 5e-08            | NA                    | Hypermethylated in FP vs FN |
| cg10072850 | 0.635   | 0.126   | 0.509     | 5e-08            | NA                    | Hypermethylated in FP vs FN |
| cg11120695 | 0.606   | 0.276   | 0.329     | 5e-08            | NA                    | Hypermethylated in FP vs FN |
| cg22960449 | 0.769   | 0.498   | 0.271     | 5e-08            | NA                    | Hypermethylated in FP vs FN |
| cg02390515 | 0.713   | 0.386   | 0.327     | 5e-08            | NA                    | Hypermethylated in FP vs FN |



### Supplementary Table 7 (continued)

| Probe      | FP.mean | FN.mean | Mean.diff | Adjusted.P.value | Promoter.related.gene | Category                    |
|------------|---------|---------|-----------|------------------|-----------------------|-----------------------------|
| cg07825369 | 0.788   | 0.492   | 0.295     | 5e-08            | NA                    | Hypermethylated in FP vs FN |
| cg15305511 | 0.587   | 0.324   | 0.263     | 5e-08            | EVC2_EVC              | Hypermethylated in FP vs FN |
| cg03185622 | 0.660   | 0.278   | 0.382     | 5e-08            | NA                    | Hypermethylated in FP vs FN |
| cg04959572 | 0.652   | 0.363   | 0.289     | 5e-08            | NA                    | Hypermethylated in FP vs FN |
| cg21629500 | 0.747   | 0.257   | 0.489     | 5e-08            | NA                    | Hypermethylated in FP vs FN |
| cg26778630 | 0.620   | 0.211   | 0.409     | 5e-08            | NA                    | Hypermethylated in FP vs FN |
| cg00863716 | 0.676   | 0.325   | 0.351     | 5e-08            | AKR1C2                | Hypermethylated in FP vs FN |
| cg25451249 | 0.696   | 0.242   | 0.455     | 5e-08            | LOC100126784          | Hypermethylated in FP vs FN |
| cg21550785 | 0.668   | 0.385   | 0.284     | 5e-08            | NA                    | Hypermethylated in FP vs FN |
| cg23493020 | 0.727   | 0.380   | 0.347     | 5e-08            | NA                    | Hypermethylated in FP vs FN |
| cg12646804 | 0.639   | 0.254   | 0.385     | 5e-08            | NA                    | Hypermethylated in FP vs FN |
| cg19548649 | 0.778   | 0.381   | 0.397     | 5e-08            | SLC13A4               | Hypermethylated in FP vs FN |
| cg03570636 | 0.631   | 0.210   | 0.421     | 5e-08            | NA                    | Hypermethylated in FP vs FN |
| cg10642330 | 0.749   | 0.301   | 0.448     | 5e-08            | NA                    | Hypermethylated in FP vs FN |
| cg25272655 | 0.411   | 0.133   | 0.278     | 5e-08            | HIST3H2BB             | Hypermethylated in FP vs FN |
| cg02284800 | 0.755   | 0.503   | 0.252     | 5e-08            | NA                    | Hypermethylated in FP vs FN |
| cg05108467 | 0.657   | 0.250   | 0.407     | 5e-08            | NR2F2                 | Hypermethylated in FP vs FN |
| cg04945557 | 0.680   | 0.342   | 0.338     | 5e-08            | LFNG                  | Hypermethylated in FP vs FN |
| cg05820959 | 0.528   | 0.273   | 0.255     | 5e-08            | NA                    | Hypermethylated in FP vs FN |
| cg11300568 | 0.743   | 0.390   | 0.354     | 5e-08            | NA                    | Hypermethylated in FP vs FN |
| cg13656878 | 0.774   | 0.478   | 0.296     | 5e-08            | NA                    | Hypermethylated in FP vs FN |
| cg06492744 | 0.636   | 0.214   | 0.422     | 5e-08            | SIPA1                 | Hypermethylated in FP vs FN |
| cg24252656 | 0.785   | 0.451   | 0.334     | 5e-08            | KCNIP4                | Hypermethylated in FP vs FN |
| cg16427033 | 0.850   | 0.452   | 0.398     | 5e-08            | NA                    | Hypermethylated in FP vs FN |
| cg04551619 | 0.874   | 0.592   | 0.282     | 5e-08            | NA                    | Hypermethylated in FP vs FN |

### Supplementary Table 7 (continued)

| Probe      | FP.mean | FN.mean | Mean.diff | Adjusted.P.value | Promoter.related.gene | Category                    |
|------------|---------|---------|-----------|------------------|-----------------------|-----------------------------|
| cg21818807 | 0.873   | 0.481   | 0.392     | 5e-08            | NA                    | Hypermethylated in FP vs FN |
| cg21183664 | 0.498   | 0.220   | 0.278     | 5e-08            | NA                    | Hypermethylated in FP vs FN |
| cg02459416 | 0.668   | 0.318   | 0.349     | 5e-08            | TMEM88                | Hypermethylated in FP vs FN |
| cg18947209 | 0.644   | 0.384   | 0.259     | 5e-08            | NA                    | Hypermethylated in FP vs FN |
| cg13836098 | 0.762   | 0.273   | 0.489     | 5e-08            | HIST1H3E              | Hypermethylated in FP vs FN |
| cg20129082 | 0.731   | 0.226   | 0.506     | 5e-08            | LOC100126784          | Hypermethylated in FP vs FN |
| cg02832905 | 0.893   | 0.529   | 0.363     | 5e-08            | NA                    | Hypermethylated in FP vs FN |
| cg10024501 | 0.802   | 0.493   | 0.309     | 5e-08            | NA                    | Hypermethylated in FP vs FN |
| cg04850017 | 0.588   | 0.255   | 0.333     | 5e-08            | NA                    | Hypermethylated in FP vs FN |
| cg07266431 | 0.714   | 0.328   | 0.387     | 5e-08            | NA                    | Hypermethylated in FP vs FN |
| cg14377596 | 0.782   | 0.252   | 0.530     | 5e-08            | NAV1                  | Hypermethylated in FP vs FN |
| cg11958060 | 0.810   | 0.353   | 0.458     | 5e-08            | NA                    | Hypermethylated in FP vs FN |
| cg11958080 | 0.365   | 0.114   | 0.251     | 5e-08            | NA                    | Hypermethylated in FP vs FN |
| cg22846611 | 0.720   | 0.360   | 0.360     | 5e-08            | LPIN3                 | Hypermethylated in FP vs FN |
| cg23887149 | 0.729   | 0.436   | 0.293     | 5e-08            | NA                    | Hypermethylated in FP vs FN |
| cg00698685 | 0.530   | 0.149   | 0.381     | 5e-08            | DRD1                  | Hypermethylated in FP vs FN |
| cg20992180 | 0.583   | 0.325   | 0.258     | 5e-08            | FOLR1                 | Hypermethylated in FP vs FN |
| cg20367852 | 0.519   | 0.130   | 0.388     | 6e-08            | NA                    | Hypermethylated in FP vs FN |
| cg06131879 | 0.639   | 0.254   | 0.386     | 6e-08            | NA                    | Hypermethylated in FP vs FN |
| cg02077702 | 0.802   | 0.515   | 0.287     | 6e-08            | ISLR                  | Hypermethylated in FP vs FN |
| cg11731890 | 0.756   | 0.266   | 0.490     | 6e-08            | HIST1H3G_HIST1H2BI    | Hypermethylated in FP vs FN |
| cg19071452 | 0.638   | 0.371   | 0.266     | 6e-08            | NMI                   | Hypermethylated in FP vs FN |
| cg16871763 | 0.796   | 0.343   | 0.453     | 6e-08            | NA                    | Hypermethylated in FP vs FN |
| cg16205958 | 0.776   | 0.421   | 0.355     | 6e-08            | NA                    | Hypermethylated in FP vs FN |
| cg20826165 | 0.835   | 0.555   | 0.281     | 6e-08            | NA                    | Hypermethylated in FP vs FN |

### Supplementary Table 7 (continued)

| Probe      | FP.mean | FN.mean | Mean.diff | Adjusted.P.value | Promoter.related.gene | Category                    |
|------------|---------|---------|-----------|------------------|-----------------------|-----------------------------|
| cg22088248 | 0.750   | 0.333   | 0.417     | 6e-08            | NA                    | Hypermethylated in FP vs FN |
| cg15864491 | 0.385   | 0.119   | 0.266     | 6e-08            | TBC1D8                | Hypermethylated in FP vs FN |
| cg13243168 | 0.557   | 0.289   | 0.267     | 6e-08            | NA                    | Hypermethylated in FP vs FN |
| cg13708635 | 0.792   | 0.358   | 0.434     | 6e-08            | NNAT                  | Hypermethylated in FP vs FN |
| cg07837085 | 0.770   | 0.453   | 0.317     | 6e-08            | SLAMF7                | Hypermethylated in FP vs FN |
| cg11598935 | 0.757   | 0.421   | 0.336     | 6e-08            | NA                    | Hypermethylated in FP vs FN |
| cg07360076 | 0.379   | 0.107   | 0.273     | 6e-08            | FGFR3                 | Hypermethylated in FP vs FN |
| cg26611328 | 0.581   | 0.317   | 0.264     | 6e-08            | NA                    | Hypermethylated in FP vs FN |
| cg14504768 | 0.841   | 0.546   | 0.295     | 6e-08            | NA                    | Hypermethylated in FP vs FN |
| cg08794157 | 0.426   | 0.151   | 0.275     | 6e-08            | PMP22                 | Hypermethylated in FP vs FN |
| cg26029997 | 0.565   | 0.148   | 0.417     | 6e-08            | TREX1                 | Hypermethylated in FP vs FN |
| cg25245161 | 0.736   | 0.468   | 0.268     | 6e-08            | NA                    | Hypermethylated in FP vs FN |
| cg02927327 | 0.578   | 0.268   | 0.310     | 6e-08            | NA                    | Hypermethylated in FP vs FN |
| cg17780207 | 0.688   | 0.389   | 0.299     | 6e-08            | NA                    | Hypermethylated in FP vs FN |
| cg24870096 | 0.817   | 0.560   | 0.257     | 6e-08            | PROP1                 | Hypermethylated in FP vs FN |
| cg07103093 | 0.583   | 0.172   | 0.411     | 6e-08            | NA                    | Hypermethylated in FP vs FN |
| cg03719978 | 0.713   | 0.320   | 0.393     | 6e-08            | TMEM88                | Hypermethylated in FP vs FN |
| cg19898448 | 0.729   | 0.356   | 0.374     | 6e-08            | NA                    | Hypermethylated in FP vs FN |
| cg03174507 | 0.733   | 0.335   | 0.398     | 6e-08            | NA                    | Hypermethylated in FP vs FN |
| cg03225093 | 0.645   | 0.255   | 0.390     | 6e-08            | NA                    | Hypermethylated in FP vs FN |
| cg07044115 | 0.798   | 0.462   | 0.336     | 6e-08            | NA                    | Hypermethylated in FP vs FN |
| cg00317837 | 0.555   | 0.252   | 0.303     | 6e-08            | NA                    | Hypermethylated in FP vs FN |
| cg22860963 | 0.626   | 0.323   | 0.303     | 6e-08            | NA                    | Hypermethylated in FP vs FN |
| cg25336900 | 0.713   | 0.447   | 0.266     | 6e-08            | NA                    | Hypermethylated in FP vs FN |
| cg10884544 | 0.509   | 0.255   | 0.253     | 6e-08            | NA                    | Hypermethylated in FP vs FN |

### Supplementary Table 7 (continued)

| Probe      | FP.mean | FN.mean | Mean.diff | Adjusted.P.value | Promoter.related.gene | Category                    |
|------------|---------|---------|-----------|------------------|-----------------------|-----------------------------|
| cg10605246 | 0.793   | 0.536   | 0.256     | 6e-08            | HILS1                 | Hypermethylated in FP vs FN |
| cg25395034 | 0.788   | 0.346   | 0.442     | 6e-08            | NA                    | Hypermethylated in FP vs FN |
| cg10693390 | 0.611   | 0.349   | 0.262     | 6e-08            | NA                    | Hypermethylated in FP vs FN |
| cg00328729 | 0.754   | 0.441   | 0.313     | 6e-08            | NA                    | Hypermethylated in FP vs FN |
| cg00578638 | 0.678   | 0.212   | 0.465     | 7e-08            | RAPGEFL1              | Hypermethylated in FP vs FN |
| cg13316625 | 0.859   | 0.538   | 0.321     | 7e-08            | NOS1                  | Hypermethylated in FP vs FN |
| cg25076408 | 0.816   | 0.509   | 0.307     | 7e-08            | TULP4                 | Hypermethylated in FP vs FN |
| cg06983765 | 0.812   | 0.477   | 0.334     | 7e-08            | NA                    | Hypermethylated in FP vs FN |
| cg08887742 | 0.801   | 0.463   | 0.338     | 7e-08            | NA                    | Hypermethylated in FP vs FN |
| cg26276014 | 0.680   | 0.376   | 0.304     | 7e-08            | CUBN                  | Hypermethylated in FP vs FN |
| cg06081306 | 0.524   | 0.146   | 0.378     | 7e-08            | NA                    | Hypermethylated in FP vs FN |
| cg09451188 | 0.776   | 0.480   | 0.296     | 7e-08            | NA                    | Hypermethylated in FP vs FN |
| cg11175150 | 0.637   | 0.363   | 0.274     | 7e-08            | NA                    | Hypermethylated in FP vs FN |
| cg19856705 | 0.768   | 0.350   | 0.418     | 7e-08            | NA                    | Hypermethylated in FP vs FN |
| cg13944468 | 0.721   | 0.380   | 0.341     | 7e-08            | NA                    | Hypermethylated in FP vs FN |
| cg20341251 | 0.546   | 0.290   | 0.257     | 7e-08            | NA                    | Hypermethylated in FP vs FN |
| cg06704518 | 0.822   | 0.362   | 0.461     | 7e-08            | NA                    | Hypermethylated in FP vs FN |
| cg03270929 | 0.559   | 0.160   | 0.399     | 7e-08            | ALS2CL                | Hypermethylated in FP vs FN |
| cg03345454 | 0.726   | 0.330   | 0.396     | 7e-08            | FZD7                  | Hypermethylated in FP vs FN |
| cg04339613 | 0.444   | 0.094   | 0.350     | 7e-08            | NA                    | Hypermethylated in FP vs FN |
| cg01534527 | 0.763   | 0.476   | 0.287     | 7e-08            | NA                    | Hypermethylated in FP vs FN |
| cg04840051 | 0.770   | 0.500   | 0.270     | 7e-08            | NA                    | Hypermethylated in FP vs FN |
| cg00829845 | 0.560   | 0.203   | 0.357     | 7e-08            | NA                    | Hypermethylated in FP vs FN |
| cg01477861 | 0.809   | 0.523   | 0.286     | 7e-08            | NA                    | Hypermethylated in FP vs FN |
| cg02909790 | 0.732   | 0.235   | 0.497     | 7e-08            | HIST1H3G              | Hypermethylated in FP vs FN |

### Supplementary Table 7 (continued)

| Probe      | FP.mean | FN.mean | Mean.diff | Adjusted.P.value | Promoter.related.gene | Category                    |
|------------|---------|---------|-----------|------------------|-----------------------|-----------------------------|
| cg19476529 | 0.797   | 0.478   | 0.320     | 7e-08            | NA                    | Hypermethylated in FP vs FN |
| cg12656291 | 0.690   | 0.322   | 0.368     | 7e-08            | NA                    | Hypermethylated in FP vs FN |
| cg19433021 | 0.761   | 0.484   | 0.277     | 7e-08            | NFYB                  | Hypermethylated in FP vs FN |
| cg16072884 | 0.721   | 0.450   | 0.271     | 7e-08            | NA                    | Hypermethylated in FP vs FN |
| cg19455322 | 0.736   | 0.215   | 0.520     | 7e-08            | ALS2CL                | Hypermethylated in FP vs FN |
| cg13633756 | 0.492   | 0.227   | 0.265     | 7e-08            | EMP3                  | Hypermethylated in FP vs FN |
| cg03257743 | 0.588   | 0.280   | 0.308     | 7e-08            | NA                    | Hypermethylated in FP vs FN |
| cg26190890 | 0.605   | 0.258   | 0.347     | 7e-08            | NA                    | Hypermethylated in FP vs FN |
| cg25461775 | 0.782   | 0.438   | 0.344     | 7e-08            | NA                    | Hypermethylated in FP vs FN |
| cg21969795 | 0.822   | 0.435   | 0.387     | 7e-08            | NA                    | Hypermethylated in FP vs FN |
| cg17974684 | 0.694   | 0.231   | 0.463     | 7e-08            | NA                    | Hypermethylated in FP vs FN |
| cg22825230 | 0.648   | 0.309   | 0.339     | 7e-08            | NA                    | Hypermethylated in FP vs FN |
| cg06439941 | 0.799   | 0.443   | 0.356     | 7e-08            | GNG11                 | Hypermethylated in FP vs FN |
| cg04413853 | 0.769   | 0.429   | 0.340     | 7e-08            | C17orf64              | Hypermethylated in FP vs FN |
| cg04880278 | 0.808   | 0.490   | 0.318     | 7e-08            | NA                    | Hypermethylated in FP vs FN |
| cg02550308 | 0.770   | 0.446   | 0.325     | 7e-08            | NA                    | Hypermethylated in FP vs FN |
| cg09035930 | 0.811   | 0.466   | 0.344     | 7e-08            | NA                    | Hypermethylated in FP vs FN |
| cg19430473 | 0.692   | 0.320   | 0.371     | 8e-08            | NA                    | Hypermethylated in FP vs FN |
| cg23335916 | 0.838   | 0.563   | 0.275     | 8e-08            | NA                    | Hypermethylated in FP vs FN |
| cg26253663 | 0.723   | 0.382   | 0.342     | 8e-08            | NA                    | Hypermethylated in FP vs FN |
| cg26348226 | 0.583   | 0.326   | 0.256     | 8e-08            | ECE1                  | Hypermethylated in FP vs FN |
| cg03055021 | 0.739   | 0.452   | 0.287     | 8e-08            | NA                    | Hypermethylated in FP vs FN |
| cg14985548 | 0.869   | 0.582   | 0.287     | 8e-08            | NA                    | Hypermethylated in FP vs FN |
| cg21379004 | 0.746   | 0.265   | 0.481     | 8e-08            | ALS2CL                | Hypermethylated in FP vs FN |
| cg11346718 | 0.732   | 0.388   | 0.344     | 8e-08            | NA                    | Hypermethylated in FP vs FN |

### Supplementary Table 7 (continued)

| Probe      | FP.mean | FN.mean | Mean.diff | Adjusted.P.value | Promoter.related.gene | Category                    |
|------------|---------|---------|-----------|------------------|-----------------------|-----------------------------|
| cg19612114 | 0.843   | 0.527   | 0.316     | 8e-08            | NA                    | Hypermethylated in FP vs FN |
| cg04117404 | 0.734   | 0.365   | 0.368     | 8e-08            | NA                    | Hypermethylated in FP vs FN |
| cg22679014 | 0.735   | 0.425   | 0.310     | 8e-08            | NA                    | Hypermethylated in FP vs FN |
| cg00135888 | 0.534   | 0.238   | 0.296     | 8e-08            | MIR130A               | Hypermethylated in FP vs FN |
| cg18273412 | 0.744   | 0.480   | 0.264     | 8e-08            | NA                    | Hypermethylated in FP vs FN |
| cg04869122 | 0.841   | 0.411   | 0.429     | 8e-08            | NA                    | Hypermethylated in FP vs FN |
| cg14948230 | 0.776   | 0.488   | 0.289     | 8e-08            | NA                    | Hypermethylated in FP vs FN |
| cg02909329 | 0.691   | 0.263   | 0.428     | 8e-08            | NA                    | Hypermethylated in FP vs FN |
| cg03101936 | 0.665   | 0.409   | 0.256     | 8e-08            | NA                    | Hypermethylated in FP vs FN |
| cg00538370 | 0.565   | 0.309   | 0.257     | 8e-08            | NA                    | Hypermethylated in FP vs FN |
| cg25962605 | 0.751   | 0.387   | 0.364     | 8e-08            | NNAT                  | Hypermethylated in FP vs FN |
| cg24110540 | 0.539   | 0.272   | 0.268     | 9e-08            | NA                    | Hypermethylated in FP vs FN |
| cg03158400 | 0.492   | 0.113   | 0.379     | 9e-08            | NA                    | Hypermethylated in FP vs FN |
| cg01413522 | 0.792   | 0.413   | 0.379     | 9e-08            | NA                    | Hypermethylated in FP vs FN |
| cg16081609 | 0.798   | 0.496   | 0.302     | 9e-08            | NA                    | Hypermethylated in FP vs FN |
| cg02353916 | 0.759   | 0.488   | 0.271     | 9e-08            | NA                    | Hypermethylated in FP vs FN |
| cg05656360 | 0.753   | 0.482   | 0.271     | 9e-08            | NA                    | Hypermethylated in FP vs FN |
| cg06675784 | 0.482   | 0.158   | 0.324     | 9e-08            | NA                    | Hypermethylated in FP vs FN |
| cg02768162 | 0.499   | 0.242   | 0.257     | 9e-08            | TMEM119               | Hypermethylated in FP vs FN |
| cg27604101 | 0.437   | 0.171   | 0.265     | 9e-08            | NA                    | Hypermethylated in FP vs FN |
| cg07986058 | 0.514   | 0.200   | 0.314     | 9e-08            | NA                    | Hypermethylated in FP vs FN |
| cg09179211 | 0.659   | 0.272   | 0.387     | 9e-08            | NA                    | Hypermethylated in FP vs FN |
| cg09501372 | 0.636   | 0.270   | 0.366     | 9e-08            | NA                    | Hypermethylated in FP vs FN |
| cg11195298 | 0.462   | 0.207   | 0.255     | 9e-08            | NA                    | Hypermethylated in FP vs FN |
| cg16497945 | 0.835   | 0.556   | 0.280     | 9e-08            | NA                    | Hypermethylated in FP vs FN |

### Supplementary Table 7 (continued)

| Probe      | FP.mean | FN.mean | Mean.diff | Adjusted.P.value | Promoter.related.gene | Category                    |
|------------|---------|---------|-----------|------------------|-----------------------|-----------------------------|
| cg14833933 | 0.705   | 0.436   | 0.268     | 9e-08            | CAPN3                 | Hypermethylated in FP vs FN |
| cg26270832 | 0.805   | 0.541   | 0.264     | 9e-08            | NA                    | Hypermethylated in FP vs FN |
| cg21738963 | 0.807   | 0.414   | 0.393     | 9e-08            | NA                    | Hypermethylated in FP vs FN |
| cg04928129 | 0.488   | 0.157   | 0.330     | 9e-08            | NA                    | Hypermethylated in FP vs FN |
| cg18640250 | 0.787   | 0.355   | 0.433     | 9e-08            | NA                    | Hypermethylated in FP vs FN |
| cg00237391 | 0.509   | 0.138   | 0.371     | 9e-08            | DEF6                  | Hypermethylated in FP vs FN |
| cg19303748 | 0.441   | 0.167   | 0.274     | 9e-08            | TSPAN4                | Hypermethylated in FP vs FN |
| cg20770175 | 0.646   | 0.305   | 0.342     | 9e-08            | NA                    | Hypermethylated in FP vs FN |
| cg08029299 | 0.802   | 0.485   | 0.317     | 9e-08            | NA                    | Hypermethylated in FP vs FN |
| cg18449964 | 0.633   | 0.204   | 0.429     | 9e-08            | NA                    | Hypermethylated in FP vs FN |
| cg08906194 | 0.603   | 0.225   | 0.379     | 9e-08            | NA                    | Hypermethylated in FP vs FN |
| cg25020286 | 0.497   | 0.131   | 0.365     | 9e-08            | PAX7                  | Hypermethylated in FP vs FN |
| cg09773238 | 0.683   | 0.325   | 0.359     | 9e-08            | NA                    | Hypermethylated in FP vs FN |
| cg12976582 | 0.617   | 0.237   | 0.380     | 1e-07            | HYAL2                 | Hypermethylated in FP vs FN |
| cg12200412 | 0.615   | 0.245   | 0.369     | 1e-07            | NA                    | Hypermethylated in FP vs FN |
| cg06838879 | 0.787   | 0.494   | 0.293     | 1e-07            | NA                    | Hypermethylated in FP vs FN |
| cg02243207 | 0.811   | 0.482   | 0.329     | 1e-07            | NA                    | Hypermethylated in FP vs FN |
| cg05645440 | 0.791   | 0.442   | 0.349     | 1e-07            | NA                    | Hypermethylated in FP vs FN |
| cg10225488 | 0.635   | 0.297   | 0.338     | 1e-07            | NA                    | Hypermethylated in FP vs FN |
| cg25020570 | 0.719   | 0.418   | 0.301     | 1e-07            | NA                    | Hypermethylated in FP vs FN |
| cg13916459 | 0.691   | 0.255   | 0.436     | 1e-07            | ALX1                  | Hypermethylated in FP vs FN |
| cg07889505 | 0.656   | 0.264   | 0.392     | 1e-07            | NA                    | Hypermethylated in FP vs FN |
| cg17817532 | 0.659   | 0.348   | 0.310     | 1e-07            | NA                    | Hypermethylated in FP vs FN |
| cg27478863 | 0.459   | 0.205   | 0.254     | 1e-07            | NA                    | Hypermethylated in FP vs FN |
| cg16283158 | 0.853   | 0.522   | 0.331     | 1e-07            | NA                    | Hypermethylated in FP vs FN |

### Supplementary Table 7 (continued)

| Probe      | FP.mean | FN.mean | Mean.diff | Adjusted.P.value | Promoter.related.gene | Category                    |
|------------|---------|---------|-----------|------------------|-----------------------|-----------------------------|
| cg13130022 | 0.781   | 0.410   | 0.371     | 1e-07            | NA                    | Hypermethylated in FP vs FN |
| cg21572719 | 0.874   | 0.604   | 0.270     | 1e-07            | CNR1                  | Hypermethylated in FP vs FN |
| cg08308801 | 0.822   | 0.410   | 0.412     | 1e-07            | NA                    | Hypermethylated in FP vs FN |
| cg26749543 | 0.766   | 0.508   | 0.258     | 1e-07            | NA                    | Hypermethylated in FP vs FN |
| cg20309975 | 0.827   | 0.576   | 0.251     | 1e-07            | NA                    | Hypermethylated in FP vs FN |
| cg00782188 | 0.831   | 0.578   | 0.253     | 1e-07            | NA                    | Hypermethylated in FP vs FN |
| cg19024700 | 0.762   | 0.364   | 0.398     | 1e-07            | HSD17B14              | Hypermethylated in FP vs FN |
| cg03720617 | 0.474   | 0.208   | 0.266     | 1e-07            | NA                    | Hypermethylated in FP vs FN |
| cg25012961 | 0.794   | 0.486   | 0.307     | 1e-07            | NA                    | Hypermethylated in FP vs FN |
| cg20965469 | 0.782   | 0.465   | 0.318     | 1e-07            | NA                    | Hypermethylated in FP vs FN |
| cg12131208 | 0.711   | 0.315   | 0.396     | 1e-07            | C17orf64              | Hypermethylated in FP vs FN |
| cg10474881 | 0.703   | 0.246   | 0.458     | 1e-07            | NA                    | Hypermethylated in FP vs FN |
| cg18930354 | 0.657   | 0.261   | 0.396     | 1e-07            | NA                    | Hypermethylated in FP vs FN |
| cg14947411 | 0.860   | 0.514   | 0.346     | 1e-07            | NA                    | Hypermethylated in FP vs FN |
| cg04943368 | 0.728   | 0.278   | 0.450     | 1e-07            | NA                    | Hypermethylated in FP vs FN |
| cg23280999 | 0.586   | 0.294   | 0.293     | 1e-07            | NA                    | Hypermethylated in FP vs FN |
| cg14208102 | 0.621   | 0.252   | 0.370     | 1e-07            | TREX1                 | Hypermethylated in FP vs FN |
| cg23614979 | 0.454   | 0.112   | 0.341     | 1e-07            | NAV2                  | Hypermethylated in FP vs FN |
| cg14270220 | 0.536   | 0.100   | 0.436     | 1e-07            | NA                    | Hypermethylated in FP vs FN |
| cg03628820 | 0.824   | 0.550   | 0.274     | 1e-07            | NA                    | Hypermethylated in FP vs FN |
| cg07478501 | 0.774   | 0.438   | 0.337     | 1e-07            | KANK2                 | Hypermethylated in FP vs FN |
| cg10763374 | 0.756   | 0.455   | 0.302     | 1e-07            | BMI1                  | Hypermethylated in FP vs FN |
| cg01825295 | 0.845   | 0.339   | 0.506     | 1e-07            | NA                    | Hypermethylated in FP vs FN |
| cg00409309 | 0.746   | 0.454   | 0.291     | 1e-07            | NA                    | Hypermethylated in FP vs FN |
| cg02386665 | 0.869   | 0.618   | 0.251     | 1e-07            | NA                    | Hypermethylated in FP vs FN |



### Supplementary Table 7 (continued)

| Probe      | FP.mean | FN.mean | Mean.diff | Adjusted.P.value | Promoter.related.gene | Category                    |
|------------|---------|---------|-----------|------------------|-----------------------|-----------------------------|
| cg00054472 | 0.593   | 0.213   | 0.380     | 1e-07            | NA                    | Hypermethylated in FP vs FN |
| cg24037813 | 0.590   | 0.253   | 0.337     | 1e-07            | NA                    | Hypermethylated in FP vs FN |
| cg07078467 | 0.825   | 0.473   | 0.352     | 1e-07            | NA                    | Hypermethylated in FP vs FN |
| cg18319533 | 0.649   | 0.365   | 0.284     | 1e-07            | NA                    | Hypermethylated in FP vs FN |
| cg07244354 | 0.459   | 0.132   | 0.327     | 1e-07            | NA                    | Hypermethylated in FP vs FN |
| cg08480996 | 0.771   | 0.416   | 0.354     | 1e-07            | NA                    | Hypermethylated in FP vs FN |
| cg02193650 | 0.630   | 0.145   | 0.484     | 1e-07            | NA                    | Hypermethylated in FP vs FN |
| cg24890716 | 0.848   | 0.531   | 0.317     | 1e-07            | NA                    | Hypermethylated in FP vs FN |
| cg19893473 | 0.869   | 0.592   | 0.277     | 1e-07            | NA                    | Hypermethylated in FP vs FN |
| cg04636269 | 0.640   | 0.233   | 0.407     | 1e-07            | NA                    | Hypermethylated in FP vs FN |
| cg06346667 | 0.697   | 0.296   | 0.401     | 1e-07            | NA                    | Hypermethylated in FP vs FN |
| cg24012925 | 0.577   | 0.296   | 0.281     | 1e-07            | NA                    | Hypermethylated in FP vs FN |
| cg14326472 | 0.799   | 0.505   | 0.295     | 1e-07            | NA                    | Hypermethylated in FP vs FN |
| cg04066021 | 0.692   | 0.357   | 0.336     | 1e-07            | NA                    | Hypermethylated in FP vs FN |
| cg00863893 | 0.732   | 0.271   | 0.462     | 1e-07            | NA                    | Hypermethylated in FP vs FN |
| cg00232500 | 0.768   | 0.447   | 0.320     | 1e-07            | FREM1                 | Hypermethylated in FP vs FN |
| cg02077216 | 0.812   | 0.447   | 0.365     | 1e-07            | NA                    | Hypermethylated in FP vs FN |
| cg19869443 | 0.578   | 0.248   | 0.330     | 1e-07            | SAMD13                | Hypermethylated in FP vs FN |
| cg19172575 | 0.860   | 0.503   | 0.357     | 1e-07            | NA                    | Hypermethylated in FP vs FN |
| cg02486086 | 0.655   | 0.211   | 0.443     | 1e-07            | NA                    | Hypermethylated in FP vs FN |
| cg14255337 | 0.783   | 0.517   | 0.266     | 1e-07            | NA                    | Hypermethylated in FP vs FN |
| cg11743000 | 0.777   | 0.527   | 0.251     | 1e-07            | NA                    | Hypermethylated in FP vs FN |
| cg09723979 | 0.744   | 0.322   | 0.423     | 1e-07            | LOC100126784          | Hypermethylated in FP vs FN |
| cg16441259 | 0.796   | 0.389   | 0.406     | 1e-07            | NA                    | Hypermethylated in FP vs FN |
| cg23045991 | 0.646   | 0.355   | 0.291     | 1e-07            | NA                    | Hypermethylated in FP vs FN |

### Supplementary Table 7 (continued)

| Probe      | FP.mean | FN.mean | Mean.diff | Adjusted.P.value | Promoter.related.gene | Category                    |
|------------|---------|---------|-----------|------------------|-----------------------|-----------------------------|
| cg06200634 | 0.595   | 0.335   | 0.261     | 1e-07            | H2AFX                 | Hypermethylated in FP vs FN |
| cg19130973 | 0.664   | 0.317   | 0.347     | 1e-07            | NA                    | Hypermethylated in FP vs FN |
| cg24775327 | 0.811   | 0.476   | 0.335     | 1e-07            | NA                    | Hypermethylated in FP vs FN |
| cg14423881 | 0.689   | 0.410   | 0.279     | 1e-07            | NA                    | Hypermethylated in FP vs FN |
| cg27239280 | 0.566   | 0.214   | 0.352     | 1e-07            | CTF1                  | Hypermethylated in FP vs FN |
| cg27651243 | 0.617   | 0.194   | 0.423     | 1e-07            | NA                    | Hypermethylated in FP vs FN |
| cg03445151 | 0.805   | 0.436   | 0.369     | 1e-07            | NA                    | Hypermethylated in FP vs FN |
| cg08423562 | 0.474   | 0.188   | 0.286     | 1e-07            | NA                    | Hypermethylated in FP vs FN |
| cg18813035 | 0.858   | 0.559   | 0.298     | 1e-07            | NA                    | Hypermethylated in FP vs FN |
| cg20000602 | 0.676   | 0.318   | 0.358     | 1e-07            | NA                    | Hypermethylated in FP vs FN |
| cg07165066 | 0.744   | 0.374   | 0.370     | 1e-07            | NA                    | Hypermethylated in FP vs FN |
| cg17745628 | 0.645   | 0.370   | 0.275     | 1e-07            | NA                    | Hypermethylated in FP vs FN |
| cg03919694 | 0.540   | 0.098   | 0.442     | 1e-07            | NAV2                  | Hypermethylated in FP vs FN |
| cg07503658 | 0.861   | 0.577   | 0.285     | 1e-07            | NA                    | Hypermethylated in FP vs FN |
| cg07279281 | 0.645   | 0.160   | 0.484     | 1e-07            | ALS2CL                | Hypermethylated in FP vs FN |
| cg26779147 | 0.591   | 0.316   | 0.276     | 1e-07            | NA                    | Hypermethylated in FP vs FN |
| cg03219768 | 0.877   | 0.589   | 0.288     | 1e-07            | NA                    | Hypermethylated in FP vs FN |
| cg18869404 | 0.648   | 0.233   | 0.415     | 1e-07            | NA                    | Hypermethylated in FP vs FN |
| cg11571304 | 0.444   | 0.137   | 0.306     | 1e-07            | TRIM38                | Hypermethylated in FP vs FN |
| cg02977443 | 0.682   | 0.395   | 0.287     | 1e-07            | NA                    | Hypermethylated in FP vs FN |
| cg14855378 | 0.814   | 0.536   | 0.277     | 1e-07            | ARSI                  | Hypermethylated in FP vs FN |
| cg08609578 | 0.687   | 0.358   | 0.329     | 1e-07            | NA                    | Hypermethylated in FP vs FN |
| cg08011838 | 0.719   | 0.407   | 0.312     | 1e-07            | NA                    | Hypermethylated in FP vs FN |
| cg01750032 | 0.592   | 0.196   | 0.396     | 1e-07            | NTF3                  | Hypermethylated in FP vs FN |
| cg05716671 | 0.781   | 0.320   | 0.461     | 1e-07            | NA                    | Hypermethylated in FP vs FN |

### Supplementary Table 7 (continued)

| Probe      | FP.mean | FN.mean | Mean.diff | Adjusted.P.value | Promoter.related.gene | Category                    |
|------------|---------|---------|-----------|------------------|-----------------------|-----------------------------|
| cg14794445 | 0.857   | 0.590   | 0.266     | 1e-07            | NA                    | Hypermethylated in FP vs FN |
| cg04525852 | 0.509   | 0.193   | 0.316     | 1e-07            | NA                    | Hypermethylated in FP vs FN |
| cg22226680 | 0.661   | 0.377   | 0.284     | 1e-07            | NA                    | Hypermethylated in FP vs FN |
| cg07045089 | 0.654   | 0.313   | 0.341     | 1e-07            | NA                    | Hypermethylated in FP vs FN |
| cg15072832 | 0.518   | 0.236   | 0.282     | 1e-07            | NA                    | Hypermethylated in FP vs FN |
| cg26006870 | 0.846   | 0.461   | 0.385     | 1e-07            | NA                    | Hypermethylated in FP vs FN |
| cg19731891 | 0.598   | 0.210   | 0.388     | 1e-07            | NA                    | Hypermethylated in FP vs FN |
| cg08038054 | 0.592   | 0.245   | 0.347     | 1e-07            | GNG11                 | Hypermethylated in FP vs FN |
| cg03540589 | 0.777   | 0.523   | 0.254     | 1e-07            | NA                    | Hypermethylated in FP vs FN |
| cg26541233 | 0.782   | 0.407   | 0.375     | 1e-07            | NA                    | Hypermethylated in FP vs FN |
| cg23404101 | 0.749   | 0.478   | 0.271     | 1e-07            | TMEM88                | Hypermethylated in FP vs FN |
| cg14185717 | 0.735   | 0.364   | 0.370     | 1e-07            | NA                    | Hypermethylated in FP vs FN |
| cg07294774 | 0.576   | 0.201   | 0.375     | 1e-07            | DIO2                  | Hypermethylated in FP vs FN |
| cg00334933 | 0.813   | 0.478   | 0.335     | 1e-07            | NA                    | Hypermethylated in FP vs FN |
| cg05168015 | 0.592   | 0.278   | 0.314     | 1e-07            | NA                    | Hypermethylated in FP vs FN |
| cg19306063 | 0.547   | 0.115   | 0.432     | 1e-07            | C10orf125             | Hypermethylated in FP vs FN |
| cg06333800 | 0.771   | 0.508   | 0.263     | 1e-07            | NA                    | Hypermethylated in FP vs FN |
| cg21665744 | 0.672   | 0.302   | 0.371     | 1e-07            | NA                    | Hypermethylated in FP vs FN |
| cg09034795 | 0.884   | 0.501   | 0.383     | 1e-07            | NA                    | Hypermethylated in FP vs FN |
| cg10064892 | 0.617   | 0.317   | 0.301     | 1e-07            | NA                    | Hypermethylated in FP vs FN |
| cg06804705 | 0.691   | 0.437   | 0.254     | 1e-07            | NCRNA00114            | Hypermethylated in FP vs FN |
| cg10486820 | 0.745   | 0.468   | 0.278     | 1e-07            | NA                    | Hypermethylated in FP vs FN |
| cg02481934 | 0.719   | 0.263   | 0.456     | 1e-07            | HIST1H3G              | Hypermethylated in FP vs FN |
| cg04860238 | 0.799   | 0.423   | 0.375     | 1e-07            | NA                    | Hypermethylated in FP vs FN |
| cg00298919 | 0.878   | 0.612   | 0.266     | 1e-07            | NA                    | Hypermethylated in FP vs FN |

### Supplementary Table 7 (continued)

| Probe      | FP.mean | FN.mean | Mean.diff | Adjusted.P.value | Promoter.related.gene | Category                    |
|------------|---------|---------|-----------|------------------|-----------------------|-----------------------------|
| cg09814231 | 0.628   | 0.349   | 0.279     | 1e-07            | NA                    | Hypermethylated in FP vs FN |
| cg25010788 | 0.767   | 0.286   | 0.481     | 1e-07            | NA                    | Hypermethylated in FP vs FN |
| cg25274008 | 0.694   | 0.436   | 0.258     | 1e-07            | TRIM62                | Hypermethylated in FP vs FN |
| cg00201819 | 0.788   | 0.530   | 0.258     | 1e-07            | NA                    | Hypermethylated in FP vs FN |
| cg01306747 | 0.785   | 0.432   | 0.353     | 1e-07            | NA                    | Hypermethylated in FP vs FN |
| cg21282907 | 0.728   | 0.457   | 0.271     | 1e-07            | NA                    | Hypermethylated in FP vs FN |
| cg20725880 | 0.675   | 0.357   | 0.318     | 1e-07            | ARL14                 | Hypermethylated in FP vs FN |
| cg22698604 | 0.618   | 0.209   | 0.409     | 1e-07            | ABLIM1                | Hypermethylated in FP vs FN |
| cg16162058 | 0.524   | 0.191   | 0.333     | 2e-07            | NA                    | Hypermethylated in FP vs FN |
| cg07109453 | 0.633   | 0.317   | 0.316     | 2e-07            | NA                    | Hypermethylated in FP vs FN |
| cg02298116 | 0.789   | 0.372   | 0.417     | 2e-07            | NA                    | Hypermethylated in FP vs FN |
| cg13645530 | 0.748   | 0.278   | 0.470     | 2e-07            | NA                    | Hypermethylated in FP vs FN |
| cg09265586 | 0.781   | 0.377   | 0.403     | 2e-07            | NA                    | Hypermethylated in FP vs FN |
| cg11798406 | 0.815   | 0.453   | 0.362     | 2e-07            | NA                    | Hypermethylated in FP vs FN |
| cg08419921 | 0.842   | 0.534   | 0.308     | 2e-07            | NA                    | Hypermethylated in FP vs FN |
| cg12080675 | 0.789   | 0.375   | 0.414     | 2e-07            | TBC1D9B               | Hypermethylated in FP vs FN |
| cg21141024 | 0.382   | 0.122   | 0.260     | 2e-07            | NA                    | Hypermethylated in FP vs FN |
| cg25692621 | 0.760   | 0.436   | 0.324     | 2e-07            | ASB4                  | Hypermethylated in FP vs FN |
| cg03333634 | 0.711   | 0.293   | 0.418     | 2e-07            | NA                    | Hypermethylated in FP vs FN |
| cg08717931 | 0.625   | 0.331   | 0.294     | 2e-07            | NA                    | Hypermethylated in FP vs FN |
| cg15941159 | 0.601   | 0.276   | 0.324     | 2e-07            | NA                    | Hypermethylated in FP vs FN |
| cg21960680 | 0.617   | 0.243   | 0.374     | 2e-07            | NA                    | Hypermethylated in FP vs FN |
| cg16032050 | 0.668   | 0.345   | 0.323     | 2e-07            | NA                    | Hypermethylated in FP vs FN |
| cg14174719 | 0.781   | 0.514   | 0.266     | 2e-07            | NA                    | Hypermethylated in FP vs FN |
| cg04343927 | 0.704   | 0.382   | 0.322     | 2e-07            | SPON2                 | Hypermethylated in FP vs FN |

### Supplementary Table 7 (continued)

| Probe      | FP.mean | FN.mean | Mean.diff | Adjusted.P.value | Promoter.related.gene | Category                    |
|------------|---------|---------|-----------|------------------|-----------------------|-----------------------------|
| cg03689092 | 0.780   | 0.449   | 0.331     | 2e-07            | LIMS2                 | Hypermethylated in FP vs FN |
| cg05873604 | 0.512   | 0.193   | 0.320     | 2e-07            | NA                    | Hypermethylated in FP vs FN |
| cg13942782 | 0.754   | 0.454   | 0.300     | 2e-07            | NA                    | Hypermethylated in FP vs FN |
| cg16230352 | 0.624   | 0.299   | 0.324     | 2e-07            | NA                    | Hypermethylated in FP vs FN |
| cg04335714 | 0.587   | 0.239   | 0.348     | 2e-07            | NA                    | Hypermethylated in FP vs FN |
| cg02478603 | 0.776   | 0.416   | 0.360     | 2e-07            | CD1B                  | Hypermethylated in FP vs FN |
| cg10126181 | 0.800   | 0.456   | 0.344     | 2e-07            | NA                    | Hypermethylated in FP vs FN |
| cg04588165 | 0.581   | 0.171   | 0.410     | 2e-07            | NA                    | Hypermethylated in FP vs FN |
| cg02102684 | 0.763   | 0.423   | 0.340     | 2e-07            | VASN                  | Hypermethylated in FP vs FN |
| cg23974194 | 0.759   | 0.312   | 0.447     | 2e-07            | NA                    | Hypermethylated in FP vs FN |
| cg00445232 | 0.638   | 0.266   | 0.372     | 2e-07            | NA                    | Hypermethylated in FP vs FN |
| cg20474425 | 0.529   | 0.123   | 0.406     | 2e-07            | NA                    | Hypermethylated in FP vs FN |
| cg19069346 | 0.463   | 0.175   | 0.288     | 2e-07            | PCP4                  | Hypermethylated in FP vs FN |
| cg22761483 | 0.637   | 0.271   | 0.367     | 2e-07            | NA                    | Hypermethylated in FP vs FN |
| cg08647912 | 0.741   | 0.308   | 0.432     | 2e-07            | NA                    | Hypermethylated in FP vs FN |
| cg24565274 | 0.776   | 0.372   | 0.404     | 2e-07            | LOC100126784          | Hypermethylated in FP vs FN |
| cg08835956 | 0.735   | 0.370   | 0.365     | 2e-07            | NA                    | Hypermethylated in FP vs FN |
| cg01811325 | 0.496   | 0.115   | 0.381     | 2e-07            | NA                    | Hypermethylated in FP vs FN |
| cg11891925 | 0.745   | 0.493   | 0.252     | 2e-07            | NA                    | Hypermethylated in FP vs FN |
| cg06982473 | 0.909   | 0.565   | 0.343     | 2e-07            | NA                    | Hypermethylated in FP vs FN |
| cg26014409 | 0.688   | 0.255   | 0.433     | 2e-07            | NA                    | Hypermethylated in FP vs FN |
| cg10550882 | 0.615   | 0.312   | 0.303     | 2e-07            | NA                    | Hypermethylated in FP vs FN |
| cg15266672 | 0.765   | 0.419   | 0.347     | 2e-07            | NA                    | Hypermethylated in FP vs FN |
| cg22815214 | 0.713   | 0.460   | 0.254     | 2e-07            | CACNA1S               | Hypermethylated in FP vs FN |
| cg22123915 | 0.805   | 0.417   | 0.389     | 2e-07            | NA                    | Hypermethylated in FP vs FN |

### Supplementary Table 7 (continued)

| Probe      | FP.mean | FN.mean | Mean.diff | Adjusted.P.value | Promoter.related.gene | Category                    |
|------------|---------|---------|-----------|------------------|-----------------------|-----------------------------|
| cg09410612 | 0.764   | 0.421   | 0.343     | 2e-07            | SPG20                 | Hypermethylated in FP vs FN |
| cg26545872 | 0.738   | 0.407   | 0.331     | 2e-07            | NA                    | Hypermethylated in FP vs FN |
| cg16791134 | 0.822   | 0.522   | 0.299     | 2e-07            | TIMP4                 | Hypermethylated in FP vs FN |
| cg01876978 | 0.501   | 0.187   | 0.314     | 2e-07            | NA                    | Hypermethylated in FP vs FN |
| cg16209664 | 0.705   | 0.302   | 0.402     | 2e-07            | NA                    | Hypermethylated in FP vs FN |
| cg06603561 | 0.859   | 0.474   | 0.385     | 2e-07            | NA                    | Hypermethylated in FP vs FN |
| cg20953310 | 0.707   | 0.358   | 0.349     | 2e-07            | NA                    | Hypermethylated in FP vs FN |
| cg14228614 | 0.598   | 0.316   | 0.282     | 2e-07            | NA                    | Hypermethylated in FP vs FN |
| cg15817236 | 0.451   | 0.144   | 0.307     | 2e-07            | ALX4                  | Hypermethylated in FP vs FN |
| cg12407867 | 0.568   | 0.284   | 0.284     | 2e-07            | SPON2                 | Hypermethylated in FP vs FN |
| cg08293097 | 0.826   | 0.570   | 0.256     | 2e-07            | NA                    | Hypermethylated in FP vs FN |
| cg11530995 | 0.625   | 0.312   | 0.313     | 2e-07            | CALML4                | Hypermethylated in FP vs FN |
| cg05404940 | 0.729   | 0.352   | 0.377     | 2e-07            | NA                    | Hypermethylated in FP vs FN |
| cg08622757 | 0.636   | 0.250   | 0.386     | 2e-07            | NA                    | Hypermethylated in FP vs FN |
| cg24724587 | 0.803   | 0.414   | 0.389     | 2e-07            | DDAH1                 | Hypermethylated in FP vs FN |
| cg15109744 | 0.721   | 0.432   | 0.289     | 2e-07            | NA                    | Hypermethylated in FP vs FN |
| cg11970797 | 0.689   | 0.356   | 0.333     | 2e-07            | NA                    | Hypermethylated in FP vs FN |
| cg23504411 | 0.583   | 0.283   | 0.300     | 2e-07            | HIST1H3J              | Hypermethylated in FP vs FN |
| cg25879102 | 0.727   | 0.320   | 0.407     | 2e-07            | NA                    | Hypermethylated in FP vs FN |
| cg17526175 | 0.677   | 0.372   | 0.305     | 2e-07            | NA                    | Hypermethylated in FP vs FN |
| cg19430694 | 0.541   | 0.233   | 0.308     | 2e-07            | NA                    | Hypermethylated in FP vs FN |
| cg01899937 | 0.791   | 0.499   | 0.292     | 2e-07            | NA                    | Hypermethylated in FP vs FN |
| cg15765546 | 0.753   | 0.503   | 0.250     | 2e-07            | NA                    | Hypermethylated in FP vs FN |
| cg14603620 | 0.675   | 0.174   | 0.501     | 2e-07            | RAPGEFL1              | Hypermethylated in FP vs FN |
| cg04454285 | 0.599   | 0.264   | 0.335     | 2e-07            | NA                    | Hypermethylated in FP vs FN |

### Supplementary Table 7 (continued)

| Probe      | FP.mean | FN.mean | Mean.diff | Adjusted.P.value | Promoter.related.gene | Category                    |
|------------|---------|---------|-----------|------------------|-----------------------|-----------------------------|
| cg24771349 | 0.596   | 0.157   | 0.438     | 2e-07            | NA                    | Hypermethylated in FP vs FN |
| cg17178218 | 0.702   | 0.399   | 0.304     | 2e-07            | NA                    | Hypermethylated in FP vs FN |
| cg21000533 | 0.823   | 0.512   | 0.311     | 2e-07            | NA                    | Hypermethylated in FP vs FN |
| cg02295216 | 0.802   | 0.492   | 0.310     | 2e-07            | CKLF_TK2              | Hypermethylated in FP vs FN |
| cg03773862 | 0.806   | 0.472   | 0.334     | 2e-07            | NA                    | Hypermethylated in FP vs FN |
| cg00857907 | 0.778   | 0.321   | 0.457     | 2e-07            | NA                    | Hypermethylated in FP vs FN |
| cg18073883 | 0.839   | 0.472   | 0.367     | 2e-07            | NA                    | Hypermethylated in FP vs FN |
| cg02543850 | 0.766   | 0.458   | 0.308     | 2e-07            | NA                    | Hypermethylated in FP vs FN |
| cg05091570 | 0.790   | 0.350   | 0.440     | 2e-07            | NA                    | Hypermethylated in FP vs FN |
| cg07013955 | 0.822   | 0.547   | 0.275     | 2e-07            | NA                    | Hypermethylated in FP vs FN |
| cg26413192 | 0.635   | 0.302   | 0.333     | 2e-07            | NA                    | Hypermethylated in FP vs FN |
| cg01227744 | 0.724   | 0.463   | 0.261     | 2e-07            | NA                    | Hypermethylated in FP vs FN |
| cg23251200 | 0.688   | 0.387   | 0.301     | 2e-07            | NA                    | Hypermethylated in FP vs FN |
| cg20452711 | 0.730   | 0.475   | 0.254     | 2e-07            | NA                    | Hypermethylated in FP vs FN |
| cg25865108 | 0.717   | 0.368   | 0.349     | 2e-07            | NA                    | Hypermethylated in FP vs FN |
| cg10298215 | 0.810   | 0.461   | 0.349     | 2e-07            | NA                    | Hypermethylated in FP vs FN |
| cg16610086 | 0.612   | 0.275   | 0.337     | 2e-07            | SLC1A3                | Hypermethylated in FP vs FN |
| cg07670722 | 0.795   | 0.437   | 0.359     | 2e-07            | NA                    | Hypermethylated in FP vs FN |
| cg13528145 | 0.821   | 0.519   | 0.303     | 2e-07            | NA                    | Hypermethylated in FP vs FN |
| cg15864834 | 0.567   | 0.147   | 0.419     | 2e-07            | NA                    | Hypermethylated in FP vs FN |
| cg23444101 | 0.650   | 0.156   | 0.494     | 2e-07            | ALS2CL                | Hypermethylated in FP vs FN |
| cg06965072 | 0.735   | 0.360   | 0.374     | 2e-07            | NA                    | Hypermethylated in FP vs FN |
| cg02464866 | 0.797   | 0.448   | 0.350     | 2e-07            | NA                    | Hypermethylated in FP vs FN |
| cg20921972 | 0.824   | 0.547   | 0.277     | 2e-07            | NA                    | Hypermethylated in FP vs FN |
| cg13408795 | 0.728   | 0.457   | 0.271     | 2e-07            | NA                    | Hypermethylated in FP vs FN |

### Supplementary Table 7 (continued)

| Probe      | FP.mean | FN.mean | Mean.diff | Adjusted.P.value | Promoter.related.gene | Category                    |
|------------|---------|---------|-----------|------------------|-----------------------|-----------------------------|
| cg12349832 | 0.601   | 0.268   | 0.333     | 2e-07            | NA                    | Hypermethylated in FP vs FN |
| cg12265878 | 0.671   | 0.359   | 0.313     | 2e-07            | NA                    | Hypermethylated in FP vs FN |
| cg03554962 | 0.803   | 0.534   | 0.269     | 2e-07            | NA                    | Hypermethylated in FP vs FN |
| cg07189401 | 0.558   | 0.230   | 0.329     | 2e-07            | LOC100126784          | Hypermethylated in FP vs FN |
| cg18631301 | 0.674   | 0.401   | 0.273     | 2e-07            | NA                    | Hypermethylated in FP vs FN |
| cg05791870 | 0.870   | 0.516   | 0.354     | 2e-07            | NA                    | Hypermethylated in FP vs FN |
| cg11728747 | 0.651   | 0.326   | 0.326     | 2e-07            | NA                    | Hypermethylated in FP vs FN |
| cg15662902 | 0.689   | 0.361   | 0.327     | 2e-07            | TNNI2                 | Hypermethylated in FP vs FN |
| cg08477641 | 0.404   | 0.110   | 0.294     | 2e-07            | TREX1                 | Hypermethylated in FP vs FN |
| cg11241151 | 0.642   | 0.354   | 0.288     | 2e-07            | NA                    | Hypermethylated in FP vs FN |
| cg01580681 | 0.591   | 0.202   | 0.389     | 2e-07            | HAND2                 | Hypermethylated in FP vs FN |
| cg22320962 | 0.657   | 0.255   | 0.402     | 2e-07            | GATA4                 | Hypermethylated in FP vs FN |
| cg03565720 | 0.773   | 0.451   | 0.322     | 2e-07            | NA                    | Hypermethylated in FP vs FN |
| cg12889126 | 0.794   | 0.419   | 0.375     | 2e-07            | NA                    | Hypermethylated in FP vs FN |
| cg12789448 | 0.760   | 0.425   | 0.335     | 2e-07            | NA                    | Hypermethylated in FP vs FN |
| cg27464065 | 0.726   | 0.414   | 0.312     | 2e-07            | NA                    | Hypermethylated in FP vs FN |
| cg14480116 | 0.622   | 0.296   | 0.327     | 2e-07            | SPRED2                | Hypermethylated in FP vs FN |
| cg15416279 | 0.640   | 0.231   | 0.409     | 2e-07            | NA                    | Hypermethylated in FP vs FN |
| cg07357716 | 0.776   | 0.461   | 0.315     | 2e-07            | NA                    | Hypermethylated in FP vs FN |
| cg11639849 | 0.629   | 0.171   | 0.459     | 2e-07            | NA                    | Hypermethylated in FP vs FN |
| cg14833024 | 0.689   | 0.333   | 0.356     | 2e-07            | NA                    | Hypermethylated in FP vs FN |
| cg25800765 | 0.573   | 0.189   | 0.384     | 2e-07            | ALX1                  | Hypermethylated in FP vs FN |
| cg17501906 | 0.769   | 0.493   | 0.276     | 2e-07            | NA                    | Hypermethylated in FP vs FN |
| cg09941363 | 0.469   | 0.166   | 0.303     | 2e-07            | NA                    | Hypermethylated in FP vs FN |
| cg26668713 | 0.451   | 0.109   | 0.342     | 2e-07            | NA                    | Hypermethylated in FP vs FN |



### Supplementary Table 7 (continued)

| Probe      | FP.mean | FN.mean | Mean.diff | Adjusted.P.value | Promoter.related.gene | Category                    |
|------------|---------|---------|-----------|------------------|-----------------------|-----------------------------|
| cg06075652 | 0.538   | 0.282   | 0.256     | 2e-07            | NA                    | Hypermethylated in FP vs FN |
| cg10744297 | 0.840   | 0.465   | 0.375     | 2e-07            | NA                    | Hypermethylated in FP vs FN |
| cg00220225 | 0.812   | 0.474   | 0.338     | 2e-07            | NA                    | Hypermethylated in FP vs FN |
| cg15024955 | 0.624   | 0.370   | 0.255     | 2e-07            | NA                    | Hypermethylated in FP vs FN |
| cg02128086 | 0.836   | 0.539   | 0.297     | 2e-07            | NA                    | Hypermethylated in FP vs FN |
| cg08279097 | 0.737   | 0.468   | 0.269     | 2e-07            | NA                    | Hypermethylated in FP vs FN |
| cg01524618 | 0.722   | 0.388   | 0.334     | 2e-07            | NA                    | Hypermethylated in FP vs FN |
| cg00550616 | 0.845   | 0.531   | 0.314     | 2e-07            | NA                    | Hypermethylated in FP vs FN |
| cg26878870 | 0.772   | 0.401   | 0.371     | 2e-07            | ZNF608                | Hypermethylated in FP vs FN |
| cg25324786 | 0.646   | 0.348   | 0.298     | 2e-07            | NA                    | Hypermethylated in FP vs FN |
| cg19157853 | 0.683   | 0.247   | 0.436     | 2e-07            | NA                    | Hypermethylated in FP vs FN |
| cg00114132 | 0.782   | 0.528   | 0.254     | 2e-07            | NA                    | Hypermethylated in FP vs FN |
| cg08642111 | 0.740   | 0.317   | 0.423     | 2e-07            | NA                    | Hypermethylated in FP vs FN |
| cg02363766 | 0.621   | 0.287   | 0.334     | 2e-07            | NA                    | Hypermethylated in FP vs FN |
| cg26092675 | 0.794   | 0.310   | 0.485     | 2e-07            | HIST1H3E              | Hypermethylated in FP vs FN |
| cg04770020 | 0.824   | 0.414   | 0.410     | 2e-07            | NA                    | Hypermethylated in FP vs FN |
| cg20048529 | 0.596   | 0.318   | 0.278     | 2e-07            | NA                    | Hypermethylated in FP vs FN |
| cg09618773 | 0.824   | 0.480   | 0.344     | 2e-07            | NA                    | Hypermethylated in FP vs FN |
| cg23907051 | 0.614   | 0.276   | 0.338     | 2e-07            | NA                    | Hypermethylated in FP vs FN |
| cg07784293 | 0.762   | 0.377   | 0.386     | 2e-07            | NA                    | Hypermethylated in FP vs FN |
| cg11505404 | 0.747   | 0.438   | 0.309     | 2e-07            | NA                    | Hypermethylated in FP vs FN |
| cg13216724 | 0.852   | 0.493   | 0.360     | 3e-07            | NA                    | Hypermethylated in FP vs FN |
| cg11724511 | 0.866   | 0.457   | 0.409     | 3e-07            | NA                    | Hypermethylated in FP vs FN |
| cg04129548 | 0.813   | 0.399   | 0.415     | 3e-07            | IRS1                  | Hypermethylated in FP vs FN |
| cg17497608 | 0.850   | 0.492   | 0.358     | 3e-07            | FZD1                  | Hypermethylated in FP vs FN |

### Supplementary Table 7 (continued)

| Probe      | FP.mean | FN.mean | Mean.diff | Adjusted.P.value | Promoter.related.gene | Category                    |
|------------|---------|---------|-----------|------------------|-----------------------|-----------------------------|
| cg18132076 | 0.745   | 0.433   | 0.312     | 3e-07            | NA                    | Hypermethylated in FP vs FN |
| cg00672445 | 0.873   | 0.607   | 0.266     | 3e-07            | NA                    | Hypermethylated in FP vs FN |
| cg13200550 | 0.620   | 0.336   | 0.284     | 3e-07            | RPSAP52               | Hypermethylated in FP vs FN |
| cg04200243 | 0.469   | 0.171   | 0.297     | 3e-07            | NA                    | Hypermethylated in FP vs FN |
| cg07300384 | 0.890   | 0.625   | 0.265     | 3e-07            | KCNIP4                | Hypermethylated in FP vs FN |
| cg04265261 | 0.474   | 0.212   | 0.261     | 3e-07            | FIBCD1                | Hypermethylated in FP vs FN |
| cg08091050 | 0.767   | 0.456   | 0.311     | 3e-07            | NA                    | Hypermethylated in FP vs FN |
| cg17969560 | 0.653   | 0.370   | 0.282     | 3e-07            | NA                    | Hypermethylated in FP vs FN |
| cg00730780 | 0.569   | 0.315   | 0.254     | 3e-07            | NA                    | Hypermethylated in FP vs FN |
| cg18045515 | 0.576   | 0.239   | 0.337     | 3e-07            | CBX2                  | Hypermethylated in FP vs FN |
| cg15652666 | 0.802   | 0.418   | 0.384     | 3e-07            | NA                    | Hypermethylated in FP vs FN |
| cg27059225 | 0.425   | 0.168   | 0.257     | 3e-07            | NA                    | Hypermethylated in FP vs FN |
| cg13522891 | 0.657   | 0.290   | 0.367     | 3e-07            | NA                    | Hypermethylated in FP vs FN |
| cg14740976 | 0.677   | 0.389   | 0.288     | 3e-07            | NA                    | Hypermethylated in FP vs FN |
| cg25813864 | 0.707   | 0.187   | 0.520     | 3e-07            | RAPGEFL1              | Hypermethylated in FP vs FN |
| cg18368599 | 0.696   | 0.393   | 0.303     | 3e-07            | NA                    | Hypermethylated in FP vs FN |
| cg00890145 | 0.703   | 0.342   | 0.361     | 3e-07            | NA                    | Hypermethylated in FP vs FN |
| cg21255880 | 0.710   | 0.315   | 0.395     | 3e-07            | NA                    | Hypermethylated in FP vs FN |
| cg18446641 | 0.770   | 0.489   | 0.281     | 3e-07            | NA                    | Hypermethylated in FP vs FN |
| cg23325335 | 0.813   | 0.522   | 0.291     | 3e-07            | NA                    | Hypermethylated in FP vs FN |
| cg01330316 | 0.685   | 0.379   | 0.307     | 3e-07            | NA                    | Hypermethylated in FP vs FN |
| cg00573606 | 0.742   | 0.350   | 0.392     | 3e-07            | COL6A3                | Hypermethylated in FP vs FN |
| cg14565781 | 0.746   | 0.384   | 0.363     | 3e-07            | BTBD19                | Hypermethylated in FP vs FN |
| cg16084133 | 0.771   | 0.400   | 0.371     | 3e-07            | NA                    | Hypermethylated in FP vs FN |
| cg17239876 | 0.791   | 0.403   | 0.388     | 3e-07            | NA                    | Hypermethylated in FP vs FN |

### Supplementary Table 7 (continued)

| Probe      | FP.mean | FN.mean | Mean.diff | Adjusted.P.value | Promoter.related.gene | Category                    |
|------------|---------|---------|-----------|------------------|-----------------------|-----------------------------|
| cg19932388 | 0.676   | 0.387   | 0.289     | 3e-07            | NA                    | Hypermethylated in FP vs FN |
| cg08689708 | 0.795   | 0.458   | 0.337     | 3e-07            | NA                    | Hypermethylated in FP vs FN |
| cg04704193 | 0.468   | 0.212   | 0.256     | 3e-07            | HIST1H3G_HIST1H2BI    | Hypermethylated in FP vs FN |
| cg16942327 | 0.673   | 0.336   | 0.337     | 3e-07            | NA                    | Hypermethylated in FP vs FN |
| cg04869379 | 0.695   | 0.314   | 0.381     | 3e-07            | NA                    | Hypermethylated in FP vs FN |
| cg04062190 | 0.672   | 0.321   | 0.351     | 3e-07            | NA                    | Hypermethylated in FP vs FN |
| cg05279866 | 0.675   | 0.334   | 0.341     | 3e-07            | NA                    | Hypermethylated in FP vs FN |
| cg23716309 | 0.584   | 0.261   | 0.323     | 3e-07            | IQCF5                 | Hypermethylated in FP vs FN |
| cg06554192 | 0.863   | 0.590   | 0.273     | 3e-07            | NA                    | Hypermethylated in FP vs FN |
| cg13105904 | 0.686   | 0.341   | 0.345     | 3e-07            | CBLN3                 | Hypermethylated in FP vs FN |
| cg03815621 | 0.506   | 0.216   | 0.290     | 3e-07            | NA                    | Hypermethylated in FP vs FN |
| cg16353800 | 0.777   | 0.359   | 0.419     | 3e-07            | NA                    | Hypermethylated in FP vs FN |
| cg06200244 | 0.666   | 0.293   | 0.373     | 3e-07            | NA                    | Hypermethylated in FP vs FN |
| cg27428520 | 0.744   | 0.468   | 0.276     | 3e-07            | NA                    | Hypermethylated in FP vs FN |
| cg21007509 | 0.760   | 0.376   | 0.383     | 3e-07            | NA                    | Hypermethylated in FP vs FN |
| cg25361844 | 0.427   | 0.102   | 0.326     | 3e-07            | SIPA1                 | Hypermethylated in FP vs FN |
| cg19778015 | 0.625   | 0.309   | 0.316     | 3e-07            | VGLL4                 | Hypermethylated in FP vs FN |
| cg13708645 | 0.640   | 0.241   | 0.398     | 3e-07            | NA                    | Hypermethylated in FP vs FN |
| cg23345300 | 0.625   | 0.313   | 0.312     | 3e-07            | NA                    | Hypermethylated in FP vs FN |
| cg04078608 | 0.494   | 0.196   | 0.299     | 3e-07            | NA                    | Hypermethylated in FP vs FN |
| cg13236409 | 0.614   | 0.324   | 0.290     | 3e-07            | NA                    | Hypermethylated in FP vs FN |
| cg14336112 | 0.859   | 0.543   | 0.316     | 3e-07            | NA                    | Hypermethylated in FP vs FN |
| cg00143220 | 0.446   | 0.133   | 0.313     | 3e-07            | NA                    | Hypermethylated in FP vs FN |
| cg05688618 | 0.700   | 0.388   | 0.312     | 3e-07            | ARHGAP24              | Hypermethylated in FP vs FN |
| cg07489132 | 0.847   | 0.470   | 0.376     | 3e-07            | NA                    | Hypermethylated in FP vs FN |

### Supplementary Table 7 (continued)

| Probe      | FP.mean | FN.mean | Mean.diff | Adjusted.P.value | Promoter.related.gene | Category                    |
|------------|---------|---------|-----------|------------------|-----------------------|-----------------------------|
| cg11348372 | 0.734   | 0.461   | 0.273     | 3e-07            | NA                    | Hypermethylated in FP vs FN |
| cg02903104 | 0.799   | 0.495   | 0.303     | 3e-07            | NA                    | Hypermethylated in FP vs FN |
| cg16317318 | 0.564   | 0.273   | 0.291     | 3e-07            | NA                    | Hypermethylated in FP vs FN |
| cg21776667 | 0.758   | 0.489   | 0.269     | 3e-07            | NA                    | Hypermethylated in FP vs FN |
| cg13493563 | 0.832   | 0.578   | 0.254     | 3e-07            | NA                    | Hypermethylated in FP vs FN |
| cg21800400 | 0.473   | 0.223   | 0.251     | 3e-07            | AKAP11                | Hypermethylated in FP vs FN |
| cg12581598 | 0.821   | 0.550   | 0.271     | 3e-07            | NA                    | Hypermethylated in FP vs FN |
| cg11779019 | 0.700   | 0.334   | 0.366     | 3e-07            | NA                    | Hypermethylated in FP vs FN |
| cg24729983 | 0.538   | 0.170   | 0.368     | 3e-07            | CCNO                  | Hypermethylated in FP vs FN |
| cg10084993 | 0.666   | 0.383   | 0.283     | 3e-07            | NA                    | Hypermethylated in FP vs FN |
| cg08764162 | 0.777   | 0.418   | 0.359     | 3e-07            | NA                    | Hypermethylated in FP vs FN |
| cg04583074 | 0.762   | 0.490   | 0.273     | 3e-07            | NA                    | Hypermethylated in FP vs FN |
| cg04552500 | 0.445   | 0.165   | 0.280     | 3e-07            | GRHL3                 | Hypermethylated in FP vs FN |
| cg03331978 | 0.749   | 0.393   | 0.356     | 3e-07            | NA                    | Hypermethylated in FP vs FN |
| cg06521357 | 0.608   | 0.243   | 0.365     | 3e-07            | NA                    | Hypermethylated in FP vs FN |
| cg04374786 | 0.736   | 0.358   | 0.378     | 3e-07            | NA                    | Hypermethylated in FP vs FN |
| cg08969855 | 0.704   | 0.390   | 0.314     | 3e-07            | NA                    | Hypermethylated in FP vs FN |
| cg02616947 | 0.354   | 0.067   | 0.287     | 3e-07            | NA                    | Hypermethylated in FP vs FN |
| cg09600088 | 0.758   | 0.386   | 0.372     | 3e-07            | NA                    | Hypermethylated in FP vs FN |
| cg02400572 | 0.679   | 0.354   | 0.325     | 3e-07            | NA                    | Hypermethylated in FP vs FN |
| cg11036041 | 0.752   | 0.498   | 0.254     | 3e-07            | NA                    | Hypermethylated in FP vs FN |
| cg05302441 | 0.657   | 0.351   | 0.307     | 3e-07            | NA                    | Hypermethylated in FP vs FN |
| cg27403612 | 0.790   | 0.483   | 0.306     | 3e-07            | NA                    | Hypermethylated in FP vs FN |
| cg00622166 | 0.591   | 0.311   | 0.280     | 3e-07            | GPT2                  | Hypermethylated in FP vs FN |
| cg16520712 | 0.824   | 0.480   | 0.344     | 3e-07            | NA                    | Hypermethylated in FP vs FN |

### Supplementary Table 7 (continued)

| Probe      | FP.mean | FN.mean | Mean.diff | Adjusted.P.value | Promoter.related.gene | Category                    |
|------------|---------|---------|-----------|------------------|-----------------------|-----------------------------|
| cg10959932 | 0.643   | 0.370   | 0.273     | 3e-07            | CPT2                  | Hypermethylated in FP vs FN |
| cg16784745 | 0.825   | 0.508   | 0.317     | 3e-07            | NA                    | Hypermethylated in FP vs FN |
| cg19918057 | 0.827   | 0.567   | 0.260     | 3e-07            | NA                    | Hypermethylated in FP vs FN |
| cg06094642 | 0.545   | 0.155   | 0.390     | 3e-07            | NA                    | Hypermethylated in FP vs FN |
| cg09825309 | 0.656   | 0.282   | 0.374     | 3e-07            | NA                    | Hypermethylated in FP vs FN |
| cg14621221 | 0.600   | 0.234   | 0.366     | 3e-07            | NA                    | Hypermethylated in FP vs FN |
| cg26338453 | 0.400   | 0.106   | 0.293     | 3e-07            | NA                    | Hypermethylated in FP vs FN |
| cg09007161 | 0.418   | 0.133   | 0.284     | 3e-07            | FANCF                 | Hypermethylated in FP vs FN |
| cg27339256 | 0.652   | 0.310   | 0.342     | 3e-07            | NA                    | Hypermethylated in FP vs FN |
| cg17200577 | 0.833   | 0.567   | 0.265     | 3e-07            | NA                    | Hypermethylated in FP vs FN |
| cg00095259 | 0.659   | 0.342   | 0.317     | 3e-07            | NA                    | Hypermethylated in FP vs FN |
| cg02526790 | 0.559   | 0.225   | 0.334     | 3e-07            | NA                    | Hypermethylated in FP vs FN |
| cg05241355 | 0.719   | 0.320   | 0.399     | 3e-07            | OTX2                  | Hypermethylated in FP vs FN |
| cg20427144 | 0.768   | 0.447   | 0.322     | 3e-07            | NA                    | Hypermethylated in FP vs FN |
| cg15826437 | 0.663   | 0.170   | 0.494     | 3e-07            | RAPGEFL1              | Hypermethylated in FP vs FN |
| cg10634568 | 0.750   | 0.370   | 0.379     | 3e-07            | NA                    | Hypermethylated in FP vs FN |
| cg17109042 | 0.585   | 0.265   | 0.320     | 3e-07            | NA                    | Hypermethylated in FP vs FN |
| cg16269755 | 0.680   | 0.355   | 0.325     | 3e-07            | NA                    | Hypermethylated in FP vs FN |
| cg06363034 | 0.683   | 0.419   | 0.264     | 3e-07            | NA                    | Hypermethylated in FP vs FN |
| cg14276379 | 0.803   | 0.519   | 0.283     | 3e-07            | NA                    | Hypermethylated in FP vs FN |
| cg06809074 | 0.777   | 0.385   | 0.392     | 3e-07            | NA                    | Hypermethylated in FP vs FN |
| cg10184431 | 0.715   | 0.302   | 0.413     | 3e-07            | HIST1H2AJ_HIST1H2BM   | Hypermethylated in FP vs FN |
| cg18824990 | 0.670   | 0.294   | 0.377     | 3e-07            | NA                    | Hypermethylated in FP vs FN |
| cg00561854 | 0.716   | 0.356   | 0.360     | 3e-07            | NA                    | Hypermethylated in FP vs FN |
| cg12686055 | 0.667   | 0.339   | 0.329     | 3e-07            | NA                    | Hypermethylated in FP vs FN |

### Supplementary Table 7 (continued)

| Probe      | FP.mean | FN.mean | Mean.diff | Adjusted.P.value | Promoter.related.gene | Category                    |
|------------|---------|---------|-----------|------------------|-----------------------|-----------------------------|
| cg16570669 | 0.755   | 0.416   | 0.339     | 3e-07            | NA                    | Hypermethylated in FP vs FN |
| cg16688434 | 0.435   | 0.157   | 0.278     | 3e-07            | NA                    | Hypermethylated in FP vs FN |
| cg12251448 | 0.690   | 0.416   | 0.274     | 3e-07            | NA                    | Hypermethylated in FP vs FN |
| cg27557974 | 0.781   | 0.491   | 0.290     | 3e-07            | NA                    | Hypermethylated in FP vs FN |
| cg12637676 | 0.876   | 0.528   | 0.348     | 3e-07            | NA                    | Hypermethylated in FP vs FN |
| cg23561531 | 0.706   | 0.395   | 0.311     | 3e-07            | NA                    | Hypermethylated in FP vs FN |
| cg17826834 | 0.641   | 0.289   | 0.353     | 3e-07            | NR2F2                 | Hypermethylated in FP vs FN |
| cg23613857 | 0.542   | 0.208   | 0.334     | 3e-07            | NA                    | Hypermethylated in FP vs FN |
| cg02238362 | 0.704   | 0.437   | 0.267     | 3e-07            | NA                    | Hypermethylated in FP vs FN |
| cg01628425 | 0.395   | 0.115   | 0.281     | 3e-07            | NA                    | Hypermethylated in FP vs FN |
| cg20169702 | 0.559   | 0.179   | 0.380     | 3e-07            | SULF1                 | Hypermethylated in FP vs FN |
| cg13977827 | 0.739   | 0.362   | 0.377     | 3e-07            | NA                    | Hypermethylated in FP vs FN |
| cg27406983 | 0.698   | 0.349   | 0.349     | 3e-07            | NA                    | Hypermethylated in FP vs FN |
| cg22684370 | 0.821   | 0.516   | 0.305     | 3e-07            | NA                    | Hypermethylated in FP vs FN |
| cg10151367 | 0.467   | 0.177   | 0.290     | 3e-07            | NA                    | Hypermethylated in FP vs FN |
| cg13028819 | 0.686   | 0.342   | 0.344     | 3e-07            | NA                    | Hypermethylated in FP vs FN |
| cg23443098 | 0.778   | 0.407   | 0.371     | 3e-07            | NA                    | Hypermethylated in FP vs FN |
| cg19339179 | 0.706   | 0.329   | 0.377     | 3e-07            | NA                    | Hypermethylated in FP vs FN |
| cg08628233 | 0.743   | 0.404   | 0.339     | 3e-07            | NA                    | Hypermethylated in FP vs FN |
| cg00289254 | 0.626   | 0.317   | 0.309     | 3e-07            | NA                    | Hypermethylated in FP vs FN |
| cg21787063 | 0.736   | 0.414   | 0.323     | 3e-07            | ASB4                  | Hypermethylated in FP vs FN |
| cg12598524 | 0.559   | 0.275   | 0.284     | 3e-07            | NA                    | Hypermethylated in FP vs FN |
| cg25356719 | 0.831   | 0.485   | 0.346     | 3e-07            | NA                    | Hypermethylated in FP vs FN |
| cg07136023 | 0.697   | 0.309   | 0.388     | 3e-07            | NA                    | Hypermethylated in FP vs FN |
| cg06927337 | 0.640   | 0.299   | 0.341     | 3e-07            | LFNG                  | Hypermethylated in FP vs FN |

### Supplementary Table 7 (continued)

| Probe      | FP.mean | FN.mean | Mean.diff | Adjusted.P.value | Promoter.related.gene | Category                    |
|------------|---------|---------|-----------|------------------|-----------------------|-----------------------------|
| cg01182865 | 0.847   | 0.528   | 0.319     | 3e-07            | NA                    | Hypermethylated in FP vs FN |
| cg23378722 | 0.701   | 0.374   | 0.327     | 3e-07            | NA                    | Hypermethylated in FP vs FN |
| cg22367556 | 0.800   | 0.463   | 0.337     | 4e-07            | NA                    | Hypermethylated in FP vs FN |
| cg10737521 | 0.761   | 0.396   | 0.365     | 4e-07            | TBC1D9B               | Hypermethylated in FP vs FN |
| cg03833141 | 0.824   | 0.559   | 0.264     | 4e-07            | NA                    | Hypermethylated in FP vs FN |
| cg12419052 | 0.786   | 0.377   | 0.409     | 4e-07            | ZIC1                  | Hypermethylated in FP vs FN |
| cg03276000 | 0.719   | 0.383   | 0.336     | 4e-07            | NA                    | Hypermethylated in FP vs FN |
| cg03105348 | 0.632   | 0.302   | 0.330     | 4e-07            | NA                    | Hypermethylated in FP vs FN |
| cg14248715 | 0.718   | 0.261   | 0.457     | 4e-07            | NA                    | Hypermethylated in FP vs FN |
| cg11670174 | 0.725   | 0.353   | 0.372     | 4e-07            | NA                    | Hypermethylated in FP vs FN |
| cg03209557 | 0.559   | 0.180   | 0.379     | 4e-07            | HIST1H2BI             | Hypermethylated in FP vs FN |
| cg19533322 | 0.860   | 0.492   | 0.368     | 4e-07            | NA                    | Hypermethylated in FP vs FN |
| cg23256675 | 0.638   | 0.362   | 0.276     | 4e-07            | NA                    | Hypermethylated in FP vs FN |
| cg26873392 | 0.862   | 0.602   | 0.260     | 4e-07            | NA                    | Hypermethylated in FP vs FN |
| cg12700788 | 0.548   | 0.166   | 0.382     | 4e-07            | NA                    | Hypermethylated in FP vs FN |
| cg26291848 | 0.769   | 0.358   | 0.410     | 4e-07            | NA                    | Hypermethylated in FP vs FN |
| cg12596243 | 0.707   | 0.392   | 0.315     | 4e-07            | NA                    | Hypermethylated in FP vs FN |
| cg25620430 | 0.617   | 0.213   | 0.404     | 4e-07            | NA                    | Hypermethylated in FP vs FN |
| cg06518763 | 0.686   | 0.427   | 0.259     | 4e-07            | TMEM88                | Hypermethylated in FP vs FN |
| cg06402675 | 0.731   | 0.308   | 0.422     | 4e-07            | NA                    | Hypermethylated in FP vs FN |
| cg20388580 | 0.685   | 0.336   | 0.349     | 4e-07            | NA                    | Hypermethylated in FP vs FN |
| cg08317243 | 0.849   | 0.594   | 0.254     | 4e-07            | NA                    | Hypermethylated in FP vs FN |
| cg14669274 | 0.515   | 0.116   | 0.399     | 4e-07            | NA                    | Hypermethylated in FP vs FN |
| cg21436520 | 0.417   | 0.137   | 0.279     | 4e-07            | NA                    | Hypermethylated in FP vs FN |
| cg14960043 | 0.379   | 0.120   | 0.259     | 4e-07            | DEF6                  | Hypermethylated in FP vs FN |

### Supplementary Table 7 (continued)

| Probe      | FP.mean | FN.mean | Mean.diff | Adjusted.P.value | Promoter.related.gene | Category                    |
|------------|---------|---------|-----------|------------------|-----------------------|-----------------------------|
| cg10300895 | 0.714   | 0.358   | 0.356     | 4e-07            | NA                    | Hypermethylated in FP vs FN |
| cg08676510 | 0.716   | 0.403   | 0.313     | 4e-07            | NA                    | Hypermethylated in FP vs FN |
| cg13455960 | 0.707   | 0.386   | 0.321     | 4e-07            | RGMA                  | Hypermethylated in FP vs FN |
| cg17701159 | 0.732   | 0.322   | 0.410     | 4e-07            | NA                    | Hypermethylated in FP vs FN |
| cg04529785 | 0.672   | 0.186   | 0.486     | 4e-07            | NA                    | Hypermethylated in FP vs FN |
| cg15142430 | 0.787   | 0.504   | 0.283     | 4e-07            | PIAS2                 | Hypermethylated in FP vs FN |
| cg17736443 | 0.743   | 0.274   | 0.469     | 4e-07            | HIST1H2AJ_HIST1H2BM   | Hypermethylated in FP vs FN |
| cg06345909 | 0.630   | 0.328   | 0.302     | 4e-07            | NA                    | Hypermethylated in FP vs FN |
| cg02162534 | 0.556   | 0.227   | 0.330     | 4e-07            | NA                    | Hypermethylated in FP vs FN |
| cg12592635 | 0.426   | 0.086   | 0.340     | 4e-07            | RBMS3                 | Hypermethylated in FP vs FN |
| cg01987353 | 0.645   | 0.344   | 0.302     | 4e-07            | NA                    | Hypermethylated in FP vs FN |
| cg02520639 | 0.699   | 0.418   | 0.281     | 4e-07            | NA                    | Hypermethylated in FP vs FN |
| cg03238581 | 0.635   | 0.349   | 0.286     | 4e-07            | CSPG4                 | Hypermethylated in FP vs FN |
| cg00950038 | 0.731   | 0.444   | 0.287     | 4e-07            | NA                    | Hypermethylated in FP vs FN |
| cg04679114 | 0.870   | 0.594   | 0.276     | 4e-07            | NA                    | Hypermethylated in FP vs FN |
| cg19689506 | 0.826   | 0.518   | 0.308     | 4e-07            | NA                    | Hypermethylated in FP vs FN |
| cg04574507 | 0.769   | 0.409   | 0.361     | 4e-07            | NA                    | Hypermethylated in FP vs FN |
| cg12391352 | 0.655   | 0.178   | 0.477     | 4e-07            | NA                    | Hypermethylated in FP vs FN |
| cg03221914 | 0.830   | 0.442   | 0.388     | 4e-07            | HIST1H2AJ             | Hypermethylated in FP vs FN |
| cg24398450 | 0.573   | 0.296   | 0.277     | 4e-07            | SELPLG                | Hypermethylated in FP vs FN |
| cg06076931 | 0.766   | 0.455   | 0.311     | 4e-07            | NA                    | Hypermethylated in FP vs FN |
| cg23601468 | 0.805   | 0.484   | 0.321     | 4e-07            | NA                    | Hypermethylated in FP vs FN |
| cg25006829 | 0.855   | 0.599   | 0.256     | 4e-07            | NA                    | Hypermethylated in FP vs FN |
| cg09020697 | 0.728   | 0.423   | 0.306     | 4e-07            | NA                    | Hypermethylated in FP vs FN |
| cg16222367 | 0.813   | 0.561   | 0.252     | 4e-07            | NA                    | Hypermethylated in FP vs FN |



### Supplementary Table 7 (continued)

| Probe      | FP.mean | FN.mean | Mean.diff | Adjusted.P.value | Promoter.related.gene | Category                    |
|------------|---------|---------|-----------|------------------|-----------------------|-----------------------------|
| cg10210909 | 0.763   | 0.411   | 0.352     | 4e-07            | NA                    | Hypermethylated in FP vs FN |
| cg20981219 | 0.569   | 0.219   | 0.350     | 4e-07            | NA                    | Hypermethylated in FP vs FN |
| cg24598316 | 0.522   | 0.193   | 0.329     | 4e-07            | NA                    | Hypermethylated in FP vs FN |
| cg15716680 | 0.613   | 0.244   | 0.369     | 4e-07            | NA                    | Hypermethylated in FP vs FN |
| cg09266087 | 0.795   | 0.460   | 0.335     | 4e-07            | NA                    | Hypermethylated in FP vs FN |
| cg16762030 | 0.765   | 0.486   | 0.279     | 4e-07            | NA                    | Hypermethylated in FP vs FN |
| cg18947676 | 0.715   | 0.431   | 0.284     | 4e-07            | NA                    | Hypermethylated in FP vs FN |
| cg03193299 | 0.666   | 0.376   | 0.290     | 4e-07            | SPON2                 | Hypermethylated in FP vs FN |
| cg02649248 | 0.562   | 0.291   | 0.271     | 4e-07            | NA                    | Hypermethylated in FP vs FN |
| cg02385153 | 0.759   | 0.483   | 0.276     | 4e-07            | LOC100310782          | Hypermethylated in FP vs FN |
| cg27052418 | 0.747   | 0.458   | 0.289     | 4e-07            | NA                    | Hypermethylated in FP vs FN |
| cg21658968 | 0.665   | 0.385   | 0.280     | 4e-07            | NA                    | Hypermethylated in FP vs FN |
| cg06553058 | 0.634   | 0.343   | 0.290     | 4e-07            | NA                    | Hypermethylated in FP vs FN |
| cg07969646 | 0.599   | 0.343   | 0.256     | 4e-07            | IER5                  | Hypermethylated in FP vs FN |
| cg09032137 | 0.842   | 0.500   | 0.342     | 4e-07            | NA                    | Hypermethylated in FP vs FN |
| cg13206932 | 0.752   | 0.386   | 0.365     | 4e-07            | NA                    | Hypermethylated in FP vs FN |
| cg11540932 | 0.631   | 0.328   | 0.303     | 5e-07            | NA                    | Hypermethylated in FP vs FN |
| cg14414406 | 0.736   | 0.438   | 0.297     | 5e-07            | NA                    | Hypermethylated in FP vs FN |
| cg12281328 | 0.749   | 0.360   | 0.389     | 5e-07            | ARSI                  | Hypermethylated in FP vs FN |
| cg13821077 | 0.779   | 0.491   | 0.288     | 5e-07            | NA                    | Hypermethylated in FP vs FN |
| cg01783960 | 0.635   | 0.382   | 0.253     | 5e-07            | NA                    | Hypermethylated in FP vs FN |
| cg21749794 | 0.663   | 0.315   | 0.348     | 5e-07            | NA                    | Hypermethylated in FP vs FN |
| cg04447981 | 0.497   | 0.215   | 0.282     | 5e-07            | SIPA1                 | Hypermethylated in FP vs FN |
| cg10418812 | 0.793   | 0.449   | 0.344     | 5e-07            | NA                    | Hypermethylated in FP vs FN |
| cg05719164 | 0.667   | 0.147   | 0.520     | 5e-07            | NA                    | Hypermethylated in FP vs FN |

### Supplementary Table 7 (continued)

| Probe      | FP.mean | FN.mean | Mean.diff | Adjusted.P.value | Promoter.related.gene | Category                    |
|------------|---------|---------|-----------|------------------|-----------------------|-----------------------------|
| cg19119942 | 0.796   | 0.458   | 0.338     | 5e-07            | NA                    | Hypermethylated in FP vs FN |
| cg15587771 | 0.767   | 0.471   | 0.296     | 5e-07            | NA                    | Hypermethylated in FP vs FN |
| cg09015905 | 0.804   | 0.547   | 0.258     | 5e-07            | NA                    | Hypermethylated in FP vs FN |
| cg14065446 | 0.642   | 0.306   | 0.336     | 5e-07            | NA                    | Hypermethylated in FP vs FN |
| cg22785261 | 0.935   | 0.542   | 0.393     | 5e-07            | NA                    | Hypermethylated in FP vs FN |
| cg20781516 | 0.844   | 0.489   | 0.354     | 5e-07            | NA                    | Hypermethylated in FP vs FN |
| cg04178858 | 0.645   | 0.178   | 0.467     | 5e-07            | RAPGEFL1              | Hypermethylated in FP vs FN |
| cg01411786 | 0.788   | 0.313   | 0.475     | 5e-07            | NA                    | Hypermethylated in FP vs FN |
| cg05730269 | 0.540   | 0.267   | 0.273     | 5e-07            | PHLDB1                | Hypermethylated in FP vs FN |
| cg00866439 | 0.898   | 0.643   | 0.255     | 5e-07            | NA                    | Hypermethylated in FP vs FN |
| cg01549315 | 0.758   | 0.405   | 0.353     | 5e-07            | NA                    | Hypermethylated in FP vs FN |
| cg04601510 | 0.833   | 0.500   | 0.333     | 5e-07            | NA                    | Hypermethylated in FP vs FN |
| cg22335692 | 0.487   | 0.197   | 0.290     | 5e-07            | NA                    | Hypermethylated in FP vs FN |
| cg16503611 | 0.809   | 0.499   | 0.310     | 5e-07            | NA                    | Hypermethylated in FP vs FN |
| cg25039498 | 0.587   | 0.312   | 0.275     | 5e-07            | NA                    | Hypermethylated in FP vs FN |
| cg15375772 | 0.650   | 0.227   | 0.424     | 5e-07            | NA                    | Hypermethylated in FP vs FN |
| cg16594139 | 0.552   | 0.187   | 0.364     | 5e-07            | HSD17B14              | Hypermethylated in FP vs FN |
| cg07312051 | 0.580   | 0.295   | 0.285     | 5e-07            | NA                    | Hypermethylated in FP vs FN |
| cg23408104 | 0.734   | 0.454   | 0.280     | 5e-07            | NA                    | Hypermethylated in FP vs FN |
| cg09177106 | 0.540   | 0.174   | 0.367     | 5e-07            | NA                    | Hypermethylated in FP vs FN |
| cg08908482 | 0.740   | 0.418   | 0.322     | 5e-07            | NA                    | Hypermethylated in FP vs FN |
| cg14422085 | 0.867   | 0.519   | 0.348     | 5e-07            | NA                    | Hypermethylated in FP vs FN |
| cg17384769 | 0.814   | 0.556   | 0.258     | 5e-07            | NA                    | Hypermethylated in FP vs FN |
| cg26645242 | 0.686   | 0.377   | 0.309     | 5e-07            | NA                    | Hypermethylated in FP vs FN |
| cg26709988 | 0.832   | 0.503   | 0.330     | 5e-07            | NA                    | Hypermethylated in FP vs FN |

### Supplementary Table 7 (continued)

| Probe      | FP.mean | FN.mean | Mean.diff | Adjusted.P.value | Promoter.related.gene | Category                    |
|------------|---------|---------|-----------|------------------|-----------------------|-----------------------------|
| cg00231483 | 0.576   | 0.285   | 0.291     | 5e-07            | CBLN2                 | Hypermethylated in FP vs FN |
| cg23042510 | 0.455   | 0.105   | 0.350     | 5e-07            | NA                    | Hypermethylated in FP vs FN |
| cg03632278 | 0.535   | 0.253   | 0.282     | 5e-07            | NA                    | Hypermethylated in FP vs FN |
| cg10865444 | 0.767   | 0.458   | 0.309     | 5e-07            | C21orf129_NCRNA00112  | Hypermethylated in FP vs FN |
| cg13376199 | 0.788   | 0.435   | 0.354     | 5e-07            | NA                    | Hypermethylated in FP vs FN |
| cg13780614 | 0.649   | 0.314   | 0.335     | 5e-07            | NA                    | Hypermethylated in FP vs FN |
| cg04337944 | 0.521   | 0.203   | 0.318     | 5e-07            | NA                    | Hypermethylated in FP vs FN |
| cg10239319 | 0.782   | 0.524   | 0.259     | 5e-07            | NA                    | Hypermethylated in FP vs FN |
| cg24797574 | 0.559   | 0.238   | 0.322     | 5e-07            | NA                    | Hypermethylated in FP vs FN |
| cg00503017 | 0.656   | 0.379   | 0.277     | 5e-07            | NA                    | Hypermethylated in FP vs FN |
| cg00046899 | 0.572   | 0.271   | 0.301     | 5e-07            | NA                    | Hypermethylated in FP vs FN |
| cg12127991 | 0.612   | 0.315   | 0.297     | 5e-07            | RHOU                  | Hypermethylated in FP vs FN |
| cg00793227 | 0.769   | 0.462   | 0.307     | 5e-07            | NA                    | Hypermethylated in FP vs FN |
| cg11261958 | 0.695   | 0.411   | 0.284     | 5e-07            | NA                    | Hypermethylated in FP vs FN |
| cg01171786 | 0.714   | 0.419   | 0.296     | 5e-07            | NA                    | Hypermethylated in FP vs FN |
| cg11351527 | 0.750   | 0.422   | 0.328     | 5e-07            | FFAR1                 | Hypermethylated in FP vs FN |
| cg01561194 | 0.509   | 0.249   | 0.261     | 5e-07            | NA                    | Hypermethylated in FP vs FN |
| cg02434703 | 0.853   | 0.572   | 0.281     | 6e-07            | NA                    | Hypermethylated in FP vs FN |
| cg16774755 | 0.873   | 0.567   | 0.306     | 6e-07            | NA                    | Hypermethylated in FP vs FN |
| cg08846079 | 0.577   | 0.268   | 0.309     | 6e-07            | NA                    | Hypermethylated in FP vs FN |
| cg06812836 | 0.622   | 0.265   | 0.358     | 6e-07            | NA                    | Hypermethylated in FP vs FN |
| cg08656333 | 0.799   | 0.494   | 0.305     | 6e-07            | NA                    | Hypermethylated in FP vs FN |
| cg00838919 | 0.760   | 0.335   | 0.425     | 6e-07            | NA                    | Hypermethylated in FP vs FN |
| cg00727310 | 0.792   | 0.404   | 0.388     | 6e-07            | IRS1                  | Hypermethylated in FP vs FN |
| cg18881873 | 0.599   | 0.227   | 0.372     | 6e-07            | NA                    | Hypermethylated in FP vs FN |

### Supplementary Table 7 (continued)

| Probe      | FP.mean | FN.mean | Mean.diff | Adjusted.P.value | Promoter.related.gene | Category                    |
|------------|---------|---------|-----------|------------------|-----------------------|-----------------------------|
| cg23762633 | 0.750   | 0.346   | 0.404     | 6e-07            | ODC1                  | Hypermethylated in FP vs FN |
| cg09703323 | 0.662   | 0.368   | 0.294     | 6e-07            | NA                    | Hypermethylated in FP vs FN |
| cg11835347 | 0.681   | 0.423   | 0.258     | 6e-07            | NA                    | Hypermethylated in FP vs FN |
| cg02693607 | 0.723   | 0.368   | 0.355     | 6e-07            | NA                    | Hypermethylated in FP vs FN |
| cg05393300 | 0.839   | 0.551   | 0.287     | 6e-07            | NA                    | Hypermethylated in FP vs FN |
| cg13462082 | 0.679   | 0.391   | 0.287     | 6e-07            | NA                    | Hypermethylated in FP vs FN |
| cg13442428 | 0.541   | 0.113   | 0.428     | 6e-07            | USP2                  | Hypermethylated in FP vs FN |
| cg23043937 | 0.696   | 0.424   | 0.272     | 6e-07            | NA                    | Hypermethylated in FP vs FN |
| cg18537222 | 0.823   | 0.517   | 0.306     | 6e-07            | NA                    | Hypermethylated in FP vs FN |
| cg10370262 | 0.738   | 0.475   | 0.263     | 6e-07            | NA                    | Hypermethylated in FP vs FN |
| cg21241151 | 0.665   | 0.348   | 0.316     | 6e-07            | NA                    | Hypermethylated in FP vs FN |
| cg18966688 | 0.827   | 0.468   | 0.359     | 6e-07            | NA                    | Hypermethylated in FP vs FN |
| cg17848389 | 0.677   | 0.408   | 0.268     | 6e-07            | NA                    | Hypermethylated in FP vs FN |
| cg10397082 | 0.649   | 0.385   | 0.263     | 6e-07            | NA                    | Hypermethylated in FP vs FN |
| cg04883903 | 0.738   | 0.234   | 0.505     | 6e-07            | NA                    | Hypermethylated in FP vs FN |
| cg18297797 | 0.749   | 0.395   | 0.354     | 6e-07            | NA                    | Hypermethylated in FP vs FN |
| cg09121695 | 0.467   | 0.127   | 0.340     | 6e-07            | NA                    | Hypermethylated in FP vs FN |
| cg02881186 | 0.631   | 0.267   | 0.363     | 6e-07            | NA                    | Hypermethylated in FP vs FN |
| cg01753263 | 0.554   | 0.241   | 0.313     | 6e-07            | NA                    | Hypermethylated in FP vs FN |
| cg18526008 | 0.498   | 0.217   | 0.282     | 6e-07            | NA                    | Hypermethylated in FP vs FN |
| cg08755784 | 0.779   | 0.391   | 0.389     | 6e-07            | NA                    | Hypermethylated in FP vs FN |
| cg08616663 | 0.780   | 0.498   | 0.282     | 6e-07            | NA                    | Hypermethylated in FP vs FN |
| cg22800862 | 0.802   | 0.549   | 0.253     | 6e-07            | NA                    | Hypermethylated in FP vs FN |
| cg10811426 | 0.698   | 0.376   | 0.322     | 6e-07            | NA                    | Hypermethylated in FP vs FN |
| cg15629460 | 0.418   | 0.160   | 0.258     | 6e-07            | NA                    | Hypermethylated in FP vs FN |

### Supplementary Table 7 (continued)

| Probe      | FP.mean | FN.mean | Mean.diff | Adjusted.P.value | Promoter.related.gene | Category                    |
|------------|---------|---------|-----------|------------------|-----------------------|-----------------------------|
| cg11426157 | 0.573   | 0.287   | 0.285     | 6e-07            | SYNPO                 | Hypermethylated in FP vs FN |
| cg23042540 | 0.738   | 0.463   | 0.275     | 6e-07            | NA                    | Hypermethylated in FP vs FN |
| cg18145505 | 0.484   | 0.167   | 0.317     | 6e-07            | GREM1                 | Hypermethylated in FP vs FN |
| cg23424125 | 0.863   | 0.525   | 0.338     | 6e-07            | NA                    | Hypermethylated in FP vs FN |
| cg12486287 | 0.713   | 0.329   | 0.384     | 6e-07            | VASN                  | Hypermethylated in FP vs FN |
| cg27458485 | 0.640   | 0.184   | 0.455     | 6e-07            | NA                    | Hypermethylated in FP vs FN |
| cg16574134 | 0.736   | 0.221   | 0.515     | 6e-07            | NA                    | Hypermethylated in FP vs FN |
| cg02729344 | 0.629   | 0.245   | 0.384     | 6e-07            | NA                    | Hypermethylated in FP vs FN |
| cg09218240 | 0.810   | 0.539   | 0.271     | 6e-07            | NA                    | Hypermethylated in FP vs FN |
| cg09074223 | 0.681   | 0.296   | 0.385     | 6e-07            | NA                    | Hypermethylated in FP vs FN |
| cg24188870 | 0.865   | 0.614   | 0.251     | 6e-07            | NA                    | Hypermethylated in FP vs FN |
| cg00085370 | 0.646   | 0.340   | 0.306     | 6e-07            | NA                    | Hypermethylated in FP vs FN |
| cg16411103 | 0.828   | 0.570   | 0.257     | 6e-07            | NA                    | Hypermethylated in FP vs FN |
| cg02232377 | 0.777   | 0.400   | 0.377     | 6e-07            | NA                    | Hypermethylated in FP vs FN |
| cg23375717 | 0.843   | 0.568   | 0.275     | 6e-07            | NA                    | Hypermethylated in FP vs FN |
| cg08439276 | 0.774   | 0.506   | 0.268     | 6e-07            | NA                    | Hypermethylated in FP vs FN |
| cg05413872 | 0.751   | 0.338   | 0.413     | 6e-07            | NA                    | Hypermethylated in FP vs FN |
| cg00762678 | 0.761   | 0.479   | 0.283     | 6e-07            | NA                    | Hypermethylated in FP vs FN |
| cg12093241 | 0.658   | 0.301   | 0.356     | 6e-07            | NA                    | Hypermethylated in FP vs FN |
| cg13468318 | 0.744   | 0.377   | 0.367     | 6e-07            | NA                    | Hypermethylated in FP vs FN |
| cg22094781 | 0.759   | 0.459   | 0.301     | 6e-07            | NA                    | Hypermethylated in FP vs FN |
| cg10131879 | 0.702   | 0.384   | 0.318     | 6e-07            | NA                    | Hypermethylated in FP vs FN |
| cg26561187 | 0.824   | 0.504   | 0.320     | 6e-07            | NA                    | Hypermethylated in FP vs FN |
| cg08263571 | 0.677   | 0.296   | 0.381     | 6e-07            | NA                    | Hypermethylated in FP vs FN |
| cg14082739 | 0.797   | 0.493   | 0.304     | 6e-07            | NA                    | Hypermethylated in FP vs FN |

### Supplementary Table 7 (continued)

| Probe      | FP.mean | FN.mean | Mean.diff | Adjusted.P.value | Promoter.related.gene | Category                    |
|------------|---------|---------|-----------|------------------|-----------------------|-----------------------------|
| cg27554551 | 0.692   | 0.407   | 0.285     | 6e-07            | VASN                  | Hypermethylated in FP vs FN |
| cg12657297 | 0.851   | 0.594   | 0.257     | 6e-07            | NA                    | Hypermethylated in FP vs FN |
| cg00023673 | 0.885   | 0.615   | 0.270     | 6e-07            | NA                    | Hypermethylated in FP vs FN |
| cg23161733 | 0.748   | 0.428   | 0.320     | 6e-07            | NA                    | Hypermethylated in FP vs FN |
| cg11097675 | 0.637   | 0.308   | 0.329     | 6e-07            | NA                    | Hypermethylated in FP vs FN |
| cg03082589 | 0.720   | 0.363   | 0.357     | 6e-07            | NA                    | Hypermethylated in FP vs FN |
| cg15204740 | 0.751   | 0.377   | 0.374     | 6e-07            | LPIN3                 | Hypermethylated in FP vs FN |
| cg07803375 | 0.694   | 0.287   | 0.407     | 7e-07            | NA                    | Hypermethylated in FP vs FN |
| cg27008230 | 0.523   | 0.160   | 0.363     | 7e-07            | ABLIM1                | Hypermethylated in FP vs FN |
| cg05508092 | 0.771   | 0.405   | 0.366     | 7e-07            | NA                    | Hypermethylated in FP vs FN |
| cg00332509 | 0.676   | 0.382   | 0.295     | 7e-07            | NA                    | Hypermethylated in FP vs FN |
| cg18594054 | 0.713   | 0.375   | 0.338     | 7e-07            | NA                    | Hypermethylated in FP vs FN |
| cg09599843 | 0.661   | 0.301   | 0.360     | 7e-07            | NA                    | Hypermethylated in FP vs FN |
| cg18899064 | 0.744   | 0.418   | 0.326     | 7e-07            | PLAT                  | Hypermethylated in FP vs FN |
| cg25422895 | 0.839   | 0.588   | 0.251     | 7e-07            | NA                    | Hypermethylated in FP vs FN |
| cg15975761 | 0.662   | 0.370   | 0.292     | 7e-07            | NA                    | Hypermethylated in FP vs FN |
| cg16144181 | 0.798   | 0.542   | 0.256     | 7e-07            | NA                    | Hypermethylated in FP vs FN |
| cg16349819 | 0.806   | 0.526   | 0.281     | 7e-07            | NA                    | Hypermethylated in FP vs FN |
| cg08631502 | 0.618   | 0.276   | 0.342     | 7e-07            | NA                    | Hypermethylated in FP vs FN |
| cg24902339 | 0.777   | 0.424   | 0.353     | 7e-07            | NA                    | Hypermethylated in FP vs FN |
| cg22921096 | 0.633   | 0.354   | 0.279     | 7e-07            | NA                    | Hypermethylated in FP vs FN |
| cg18410680 | 0.856   | 0.511   | 0.346     | 7e-07            | TMEM88                | Hypermethylated in FP vs FN |
| cg01142676 | 0.669   | 0.386   | 0.283     | 7e-07            | FXYD2                 | Hypermethylated in FP vs FN |
| cg21648121 | 0.666   | 0.320   | 0.346     | 7e-07            | NA                    | Hypermethylated in FP vs FN |
| cg12809365 | 0.560   | 0.236   | 0.324     | 7e-07            | NA                    | Hypermethylated in FP vs FN |

### Supplementary Table 7 (continued)

| Probe      | FP.mean | FN.mean | Mean.diff | Adjusted.P.value | Promoter.related.gene | Category                    |
|------------|---------|---------|-----------|------------------|-----------------------|-----------------------------|
| cg22884792 | 0.340   | 0.060   | 0.280     | 7e-07            | WNT1                  | Hypermethylated in FP vs FN |
| cg07339236 | 0.432   | 0.168   | 0.264     | 7e-07            | NA                    | Hypermethylated in FP vs FN |
| cg13466576 | 0.861   | 0.584   | 0.277     | 7e-07            | SNORA70C              | Hypermethylated in FP vs FN |
| cg04990724 | 0.560   | 0.128   | 0.433     | 7e-07            | ALS2CL                | Hypermethylated in FP vs FN |
| cg26127778 | 0.721   | 0.310   | 0.411     | 7e-07            | RGMA                  | Hypermethylated in FP vs FN |
| cg02940164 | 0.456   | 0.125   | 0.332     | 7e-07            | NA                    | Hypermethylated in FP vs FN |
| cg09409786 | 0.845   | 0.592   | 0.253     | 7e-07            | NA                    | Hypermethylated in FP vs FN |
| cg13119578 | 0.740   | 0.462   | 0.278     | 7e-07            | NA                    | Hypermethylated in FP vs FN |
| cg17142020 | 0.720   | 0.426   | 0.293     | 7e-07            | NA                    | Hypermethylated in FP vs FN |
| cg16320159 | 0.755   | 0.385   | 0.371     | 7e-07            | ADD3                  | Hypermethylated in FP vs FN |
| cg00058887 | 0.683   | 0.292   | 0.391     | 7e-07            | NA                    | Hypermethylated in FP vs FN |
| cg25092838 | 0.767   | 0.319   | 0.449     | 7e-07            | OTX2OS1               | Hypermethylated in FP vs FN |
| cg05732979 | 0.742   | 0.378   | 0.364     | 7e-07            | NA                    | Hypermethylated in FP vs FN |
| cg16889320 | 0.693   | 0.362   | 0.331     | 7e-07            | NA                    | Hypermethylated in FP vs FN |
| cg11574184 | 0.566   | 0.269   | 0.297     | 7e-07            | MGC70857              | Hypermethylated in FP vs FN |
| cg10818833 | 0.620   | 0.168   | 0.452     | 7e-07            | NA                    | Hypermethylated in FP vs FN |
| cg13728131 | 0.781   | 0.399   | 0.382     | 7e-07            | NA                    | Hypermethylated in FP vs FN |
| cg02230811 | 0.708   | 0.368   | 0.340     | 7e-07            | NA                    | Hypermethylated in FP vs FN |
| cg18150280 | 0.688   | 0.372   | 0.315     | 7e-07            | RGS2                  | Hypermethylated in FP vs FN |
| cg14679780 | 0.608   | 0.291   | 0.317     | 7e-07            | NA                    | Hypermethylated in FP vs FN |
| cg18297437 | 0.734   | 0.265   | 0.469     | 7e-07            | NA                    | Hypermethylated in FP vs FN |
| cg02640809 | 0.732   | 0.467   | 0.265     | 7e-07            | NA                    | Hypermethylated in FP vs FN |
| cg03806095 | 0.467   | 0.120   | 0.346     | 7e-07            | NA                    | Hypermethylated in FP vs FN |
| cg14297340 | 0.749   | 0.432   | 0.317     | 7e-07            | NA                    | Hypermethylated in FP vs FN |
| cg14551562 | 0.691   | 0.299   | 0.392     | 7e-07            | NA                    | Hypermethylated in FP vs FN |

### Supplementary Table 7 (continued)

| Probe      | FP.mean | FN.mean | Mean.diff | Adjusted.P.value | Promoter.related.gene | Category                    |
|------------|---------|---------|-----------|------------------|-----------------------|-----------------------------|
| cg23276695 | 0.850   | 0.578   | 0.272     | 7e-07            | CNR1                  | Hypermethylated in FP vs FN |
| cg12091376 | 0.549   | 0.207   | 0.341     | 7e-07            | RIPK4                 | Hypermethylated in FP vs FN |
| cg17416644 | 0.836   | 0.466   | 0.370     | 7e-07            | NA                    | Hypermethylated in FP vs FN |
| cg07922606 | 0.779   | 0.348   | 0.431     | 8e-07            | HIST1H3E              | Hypermethylated in FP vs FN |
| cg09450823 | 0.639   | 0.362   | 0.278     | 8e-07            | NA                    | Hypermethylated in FP vs FN |
| cg04697262 | 0.689   | 0.281   | 0.408     | 8e-07            | NA                    | Hypermethylated in FP vs FN |
| cg26262049 | 0.786   | 0.449   | 0.337     | 8e-07            | NA                    | Hypermethylated in FP vs FN |
| cg05688616 | 0.811   | 0.461   | 0.350     | 8e-07            | NA                    | Hypermethylated in FP vs FN |
| cg15271616 | 0.637   | 0.350   | 0.287     | 8e-07            | NA                    | Hypermethylated in FP vs FN |
| cg15803845 | 0.757   | 0.422   | 0.336     | 8e-07            | NA                    | Hypermethylated in FP vs FN |
| cg05194412 | 0.573   | 0.302   | 0.270     | 8e-07            | NA                    | Hypermethylated in FP vs FN |
| cg16151261 | 0.573   | 0.273   | 0.300     | 8e-07            | NA                    | Hypermethylated in FP vs FN |
| cg23691894 | 0.781   | 0.440   | 0.342     | 8e-07            | ADD3                  | Hypermethylated in FP vs FN |
| cg11100309 | 0.617   | 0.229   | 0.388     | 8e-07            | NA                    | Hypermethylated in FP vs FN |
| cg12439977 | 0.572   | 0.260   | 0.312     | 8e-07            | NA                    | Hypermethylated in FP vs FN |
| cg01560642 | 0.390   | 0.137   | 0.252     | 8e-07            | NA                    | Hypermethylated in FP vs FN |
| cg21515003 | 0.780   | 0.420   | 0.360     | 8e-07            | NA                    | Hypermethylated in FP vs FN |
| cg14436569 | 0.655   | 0.379   | 0.277     | 8e-07            | NA                    | Hypermethylated in FP vs FN |
| cg17307280 | 0.476   | 0.134   | 0.342     | 8e-07            | DRD1                  | Hypermethylated in FP vs FN |
| cg00446697 | 0.697   | 0.406   | 0.291     | 8e-07            | NA                    | Hypermethylated in FP vs FN |
| cg02046247 | 0.765   | 0.404   | 0.361     | 8e-07            | NA                    | Hypermethylated in FP vs FN |
| cg01409709 | 0.816   | 0.472   | 0.344     | 8e-07            | NA                    | Hypermethylated in FP vs FN |
| cg22436336 | 0.708   | 0.438   | 0.270     | 8e-07            | NA                    | Hypermethylated in FP vs FN |
| cg27459353 | 0.555   | 0.230   | 0.325     | 8e-07            | ATP2C2                | Hypermethylated in FP vs FN |
| cg12240761 | 0.442   | 0.185   | 0.257     | 8e-07            | NA                    | Hypermethylated in FP vs FN |



### Supplementary Table 7 (continued)

| Probe      | FP.mean | FN.mean | Mean.diff | Adjusted.P.value | Promoter.related.gene | Category                    |
|------------|---------|---------|-----------|------------------|-----------------------|-----------------------------|
| cg13641198 | 0.798   | 0.485   | 0.313     | 8e-07            | NA                    | Hypermethylated in FP vs FN |
| cg01733284 | 0.791   | 0.421   | 0.370     | 8e-07            | OR10K2                | Hypermethylated in FP vs FN |
| cg23013968 | 0.558   | 0.280   | 0.278     | 8e-07            | RGMA                  | Hypermethylated in FP vs FN |
| cg14632140 | 0.518   | 0.174   | 0.344     | 8e-07            | NA                    | Hypermethylated in FP vs FN |
| cg00965121 | 0.617   | 0.312   | 0.306     | 8e-07            | NA                    | Hypermethylated in FP vs FN |
| cg17072494 | 0.806   | 0.493   | 0.313     | 8e-07            | NA                    | Hypermethylated in FP vs FN |
| cg17076592 | 0.826   | 0.513   | 0.313     | 8e-07            | KTI12                 | Hypermethylated in FP vs FN |
| cg15158106 | 0.698   | 0.441   | 0.256     | 8e-07            | NA                    | Hypermethylated in FP vs FN |
| cg15442737 | 0.517   | 0.173   | 0.344     | 8e-07            | NA                    | Hypermethylated in FP vs FN |
| cg26118943 | 0.744   | 0.432   | 0.312     | 8e-07            | SNX18                 | Hypermethylated in FP vs FN |
| cg26747290 | 0.666   | 0.338   | 0.329     | 8e-07            | NA                    | Hypermethylated in FP vs FN |
| cg23820770 | 0.546   | 0.196   | 0.350     | 8e-07            | DYSF                  | Hypermethylated in FP vs FN |
| cg07423151 | 0.792   | 0.476   | 0.316     | 9e-07            | NA                    | Hypermethylated in FP vs FN |
| cg10636246 | 0.739   | 0.454   | 0.285     | 9e-07            | AIM2                  | Hypermethylated in FP vs FN |
| cg20566970 | 0.851   | 0.568   | 0.283     | 9e-07            | NA                    | Hypermethylated in FP vs FN |
| cg22892904 | 0.740   | 0.417   | 0.323     | 9e-07            | CBX2                  | Hypermethylated in FP vs FN |
| cg22118126 | 0.786   | 0.398   | 0.388     | 9e-07            | LPIN3                 | Hypermethylated in FP vs FN |
| cg24298539 | 0.740   | 0.468   | 0.271     | 9e-07            | NA                    | Hypermethylated in FP vs FN |
| cg16676413 | 0.484   | 0.183   | 0.301     | 9e-07            | NA                    | Hypermethylated in FP vs FN |
| cg18437209 | 0.425   | 0.138   | 0.287     | 9e-07            | NA                    | Hypermethylated in FP vs FN |
| cg02919090 | 0.721   | 0.458   | 0.263     | 9e-07            | NA                    | Hypermethylated in FP vs FN |
| cg24692310 | 0.733   | 0.480   | 0.253     | 9e-07            | NA                    | Hypermethylated in FP vs FN |
| cg17108141 | 0.827   | 0.441   | 0.386     | 9e-07            | DDAH1                 | Hypermethylated in FP vs FN |
| cg18730174 | 0.811   | 0.417   | 0.394     | 9e-07            | NA                    | Hypermethylated in FP vs FN |
| cg00822361 | 0.726   | 0.435   | 0.292     | 9e-07            | NA                    | Hypermethylated in FP vs FN |

### Supplementary Table 7 (continued)

| Probe      | FP.mean | FN.mean | Mean.diff | Adjusted.P.value | Promoter.related.gene | Category                    |
|------------|---------|---------|-----------|------------------|-----------------------|-----------------------------|
| cg26363579 | 0.735   | 0.482   | 0.253     | 9e-07            | NA                    | Hypermethylated in FP vs FN |
| cg27269149 | 0.826   | 0.556   | 0.269     | 9e-07            | NA                    | Hypermethylated in FP vs FN |
| cg09829551 | 0.770   | 0.408   | 0.362     | 9e-07            | NA                    | Hypermethylated in FP vs FN |
| cg11622162 | 0.709   | 0.427   | 0.282     | 9e-07            | NA                    | Hypermethylated in FP vs FN |
| cg04473763 | 0.716   | 0.409   | 0.307     | 9e-07            | NA                    | Hypermethylated in FP vs FN |
| cg06383135 | 0.672   | 0.349   | 0.323     | 9e-07            | USP46                 | Hypermethylated in FP vs FN |
| cg22967008 | 0.585   | 0.321   | 0.264     | 9e-07            | NA                    | Hypermethylated in FP vs FN |
| cg21958524 | 0.676   | 0.277   | 0.399     | 9e-07            | NA                    | Hypermethylated in FP vs FN |
| cg07148341 | 0.661   | 0.371   | 0.290     | 9e-07            | NA                    | Hypermethylated in FP vs FN |
| cg22388607 | 0.548   | 0.225   | 0.323     | 9e-07            | NA                    | Hypermethylated in FP vs FN |
| cg01903327 | 0.719   | 0.465   | 0.254     | 9e-07            | ACYP1                 | Hypermethylated in FP vs FN |
| cg25574750 | 0.836   | 0.515   | 0.321     | 9e-07            | NA                    | Hypermethylated in FP vs FN |
| cg10520790 | 0.522   | 0.239   | 0.283     | 9e-07            | NA                    | Hypermethylated in FP vs FN |
| cg10495754 | 0.603   | 0.249   | 0.354     | 9e-07            | PROCA1                | Hypermethylated in FP vs FN |
| cg17253459 | 0.844   | 0.554   | 0.290     | 9e-07            | NA                    | Hypermethylated in FP vs FN |
| cg04486778 | 0.362   | 0.108   | 0.254     | 9e-07            | NA                    | Hypermethylated in FP vs FN |
| cg01557951 | 0.691   | 0.382   | 0.309     | 9e-07            | NA                    | Hypermethylated in FP vs FN |
| cg11956866 | 0.843   | 0.583   | 0.260     | 9e-07            | NA                    | Hypermethylated in FP vs FN |
| cg06844526 | 0.756   | 0.429   | 0.327     | 1e-06            | NA                    | Hypermethylated in FP vs FN |
| cg14093103 | 0.791   | 0.528   | 0.263     | 1e-06            | NFIA                  | Hypermethylated in FP vs FN |
| cg24180402 | 0.633   | 0.248   | 0.385     | 1e-06            | NA                    | Hypermethylated in FP vs FN |
| cg08968863 | 0.493   | 0.218   | 0.275     | 1e-06            | NA                    | Hypermethylated in FP vs FN |
| cg13858127 | 0.927   | 0.608   | 0.318     | 1e-06            | NA                    | Hypermethylated in FP vs FN |
| cg00116315 | 0.770   | 0.483   | 0.287     | 1e-06            | TEAD3                 | Hypermethylated in FP vs FN |
| cg07335915 | 0.756   | 0.367   | 0.389     | 1e-06            | NA                    | Hypermethylated in FP vs FN |

### Supplementary Table 7 (continued)

| Probe      | FP.mean | FN.mean | Mean.diff | Adjusted.P.value | Promoter.related.gene | Category                    |
|------------|---------|---------|-----------|------------------|-----------------------|-----------------------------|
| cg05174759 | 0.774   | 0.478   | 0.296     | 1e-06            | NA                    | Hypermethylated in FP vs FN |
| cg04830857 | 0.850   | 0.570   | 0.279     | 1e-06            | LOC100287227          | Hypermethylated in FP vs FN |
| cg23036947 | 0.526   | 0.203   | 0.324     | 1e-06            | MXRA8                 | Hypermethylated in FP vs FN |
| cg19295840 | 0.801   | 0.467   | 0.333     | 1e-06            | NA                    | Hypermethylated in FP vs FN |
| cg06096901 | 0.830   | 0.472   | 0.358     | 1e-06            | NA                    | Hypermethylated in FP vs FN |
| cg00232092 | 0.869   | 0.591   | 0.278     | 1e-06            | NA                    | Hypermethylated in FP vs FN |
| cg03709307 | 0.629   | 0.236   | 0.393     | 1e-06            | NA                    | Hypermethylated in FP vs FN |
| cg23820945 | 0.702   | 0.366   | 0.336     | 1e-06            | GRHL3                 | Hypermethylated in FP vs FN |
| cg00506828 | 0.724   | 0.417   | 0.307     | 1e-06            | NA                    | Hypermethylated in FP vs FN |
| cg27238358 | 0.825   | 0.567   | 0.257     | 1e-06            | NA                    | Hypermethylated in FP vs FN |
| cg12656666 | 0.573   | 0.262   | 0.311     | 1e-06            | NA                    | Hypermethylated in FP vs FN |
| cg08175396 | 0.818   | 0.546   | 0.273     | 1e-06            | NA                    | Hypermethylated in FP vs FN |
| cg09276451 | 0.827   | 0.502   | 0.325     | 1e-06            | VASN                  | Hypermethylated in FP vs FN |
| cg06628109 | 0.691   | 0.308   | 0.383     | 1e-06            | NA                    | Hypermethylated in FP vs FN |
| cg14170545 | 0.530   | 0.241   | 0.289     | 1e-06            | NA                    | Hypermethylated in FP vs FN |
| cg10522979 | 0.633   | 0.350   | 0.283     | 1e-06            | NA                    | Hypermethylated in FP vs FN |
| cg00613284 | 0.675   | 0.373   | 0.302     | 1e-06            | NA                    | Hypermethylated in FP vs FN |
| cg03642518 | 0.792   | 0.449   | 0.343     | 1e-06            | NA                    | Hypermethylated in FP vs FN |
| cg10547387 | 0.742   | 0.442   | 0.300     | 1e-06            | NA                    | Hypermethylated in FP vs FN |
| cg08044454 | 0.692   | 0.370   | 0.322     | 1e-06            | ELMO1                 | Hypermethylated in FP vs FN |
| cg22700848 | 0.516   | 0.246   | 0.270     | 1e-06            | NA                    | Hypermethylated in FP vs FN |
| cg20711695 | 0.891   | 0.589   | 0.302     | 1e-06            | NA                    | Hypermethylated in FP vs FN |
| cg02105211 | 0.780   | 0.529   | 0.250     | 1e-06            | NA                    | Hypermethylated in FP vs FN |
| cg12117975 | 0.867   | 0.588   | 0.279     | 1e-06            | NA                    | Hypermethylated in FP vs FN |
| cg07479303 | 0.849   | 0.577   | 0.273     | 1e-06            | NA                    | Hypermethylated in FP vs FN |

### Supplementary Table 7 (continued)

| Probe      | FP.mean | FN.mean | Mean.diff | Adjusted.P.value | Promoter.related.gene | Category                    |
|------------|---------|---------|-----------|------------------|-----------------------|-----------------------------|
| cg11676931 | 0.725   | 0.435   | 0.290     | 1e-06            | NA                    | Hypermethylated in FP vs FN |
| cg19530831 | 0.627   | 0.260   | 0.367     | 1e-06            | NA                    | Hypermethylated in FP vs FN |
| cg10558233 | 0.601   | 0.298   | 0.302     | 1e-06            | NA                    | Hypermethylated in FP vs FN |
| cg03034070 | 0.562   | 0.287   | 0.274     | 1e-06            | COL5A2                | Hypermethylated in FP vs FN |
| cg08017409 | 0.758   | 0.506   | 0.252     | 1e-06            | NA                    | Hypermethylated in FP vs FN |
| cg07979401 | 0.421   | 0.140   | 0.281     | 1e-06            | NA                    | Hypermethylated in FP vs FN |
| cg22866426 | 0.726   | 0.299   | 0.427     | 1e-06            | NA                    | Hypermethylated in FP vs FN |
| cg21851391 | 0.853   | 0.594   | 0.259     | 1e-06            | DLGAP2                | Hypermethylated in FP vs FN |
| cg08183307 | 0.609   | 0.325   | 0.284     | 1e-06            | NA                    | Hypermethylated in FP vs FN |
| cg27224791 | 0.681   | 0.402   | 0.279     | 1e-06            | HILS1                 | Hypermethylated in FP vs FN |
| cg24931355 | 0.678   | 0.397   | 0.281     | 1e-06            | NA                    | Hypermethylated in FP vs FN |
| cg05534186 | 0.651   | 0.264   | 0.387     | 1e-06            | CCNO                  | Hypermethylated in FP vs FN |
| cg09692368 | 0.844   | 0.543   | 0.301     | 1e-06            | NA                    | Hypermethylated in FP vs FN |
| cg09790617 | 0.822   | 0.557   | 0.265     | 1e-06            | NA                    | Hypermethylated in FP vs FN |
| cg09480446 | 0.787   | 0.509   | 0.278     | 1e-06            | NA                    | Hypermethylated in FP vs FN |
| cg05415931 | 0.792   | 0.539   | 0.253     | 1e-06            | NA                    | Hypermethylated in FP vs FN |
| cg08498585 | 0.673   | 0.402   | 0.271     | 1e-06            | NA                    | Hypermethylated in FP vs FN |
| cg10177359 | 0.485   | 0.217   | 0.267     | 1e-06            | NA                    | Hypermethylated in FP vs FN |
| cg12136387 | 0.649   | 0.342   | 0.306     | 1e-06            | NA                    | Hypermethylated in FP vs FN |
| cg25654774 | 0.674   | 0.322   | 0.352     | 1e-06            | NA                    | Hypermethylated in FP vs FN |
| cg00409696 | 0.604   | 0.319   | 0.285     | 1e-06            | NA                    | Hypermethylated in FP vs FN |
| cg15611151 | 0.563   | 0.242   | 0.322     | 1e-06            | NA                    | Hypermethylated in FP vs FN |
| cg18204158 | 0.711   | 0.362   | 0.350     | 1e-06            | NA                    | Hypermethylated in FP vs FN |
| cg12405136 | 0.503   | 0.232   | 0.271     | 1e-06            | MRGPRF                | Hypermethylated in FP vs FN |
| cg10711871 | 0.768   | 0.486   | 0.282     | 1e-06            | NA                    | Hypermethylated in FP vs FN |

### Supplementary Table 7 (continued)

| Probe      | FP.mean | FN.mean | Mean.diff | Adjusted.P.value | Promoter.related.gene | Category                    |
|------------|---------|---------|-----------|------------------|-----------------------|-----------------------------|
| cg14078053 | 0.695   | 0.408   | 0.286     | 1e-06            | IRS1                  | Hypermethylated in FP vs FN |
| cg14614296 | 0.853   | 0.582   | 0.271     | 1e-06            | NA                    | Hypermethylated in FP vs FN |
| cg23117583 | 0.821   | 0.540   | 0.281     | 1e-06            | NA                    | Hypermethylated in FP vs FN |
| cg27370028 | 0.724   | 0.471   | 0.253     | 1e-06            | TCEA2                 | Hypermethylated in FP vs FN |
| cg03294619 | 0.625   | 0.182   | 0.443     | 1e-06            | NKX2-5                | Hypermethylated in FP vs FN |
| cg26893605 | 0.767   | 0.491   | 0.276     | 1e-06            | NA                    | Hypermethylated in FP vs FN |
| cg07857444 | 0.894   | 0.592   | 0.302     | 1e-06            | NA                    | Hypermethylated in FP vs FN |
| cg02584678 | 0.686   | 0.397   | 0.289     | 1e-06            | NA                    | Hypermethylated in FP vs FN |
| cg11320910 | 0.814   | 0.476   | 0.338     | 1e-06            | NA                    | Hypermethylated in FP vs FN |
| cg01252526 | 0.769   | 0.350   | 0.418     | 1e-06            | NA                    | Hypermethylated in FP vs FN |
| cg24978725 | 0.621   | 0.311   | 0.311     | 1e-06            | NA                    | Hypermethylated in FP vs FN |
| cg20914572 | 0.626   | 0.277   | 0.349     | 1e-06            | PRRT1_PPT2            | Hypermethylated in FP vs FN |
| cg27621997 | 0.765   | 0.434   | 0.331     | 1e-06            | CCDC86                | Hypermethylated in FP vs FN |
| cg25463863 | 0.820   | 0.511   | 0.310     | 1e-06            | NA                    | Hypermethylated in FP vs FN |
| cg26539455 | 0.639   | 0.375   | 0.264     | 1e-06            | NA                    | Hypermethylated in FP vs FN |
| cg15893779 | 0.680   | 0.352   | 0.329     | 1e-06            | NA                    | Hypermethylated in FP vs FN |
| cg27598407 | 0.838   | 0.521   | 0.317     | 1e-06            | NA                    | Hypermethylated in FP vs FN |
| cg16143889 | 0.757   | 0.490   | 0.267     | 1e-06            | NA                    | Hypermethylated in FP vs FN |
| cg22617819 | 0.592   | 0.327   | 0.266     | 1e-06            | NA                    | Hypermethylated in FP vs FN |
| cg22061561 | 0.843   | 0.582   | 0.261     | 1e-06            | NA                    | Hypermethylated in FP vs FN |
| cg13777700 | 0.626   | 0.356   | 0.271     | 1e-06            | NA                    | Hypermethylated in FP vs FN |
| cg11589520 | 0.371   | 0.114   | 0.257     | 1e-06            | NA                    | Hypermethylated in FP vs FN |
| cg27578754 | 0.750   | 0.473   | 0.277     | 1e-06            | PHF14                 | Hypermethylated in FP vs FN |
| cg07757094 | 0.719   | 0.422   | 0.297     | 1e-06            | NA                    | Hypermethylated in FP vs FN |
| cg06009267 | 0.670   | 0.411   | 0.259     | 1e-06            | EPPK1                 | Hypermethylated in FP vs FN |

### Supplementary Table 7 (continued)

| Probe      | FP.mean | FN.mean | Mean.diff | Adjusted.P.value | Promoter.related.gene | Category                    |
|------------|---------|---------|-----------|------------------|-----------------------|-----------------------------|
| cg20382675 | 0.786   | 0.506   | 0.280     | 1e-06            | MIR1284               | Hypermethylated in FP vs FN |
| cg09333221 | 0.519   | 0.232   | 0.288     | 1e-06            | NA                    | Hypermethylated in FP vs FN |
| cg18056266 | 0.452   | 0.160   | 0.292     | 1e-06            | COL8A1                | Hypermethylated in FP vs FN |
| cg25712005 | 0.682   | 0.404   | 0.279     | 1e-06            | NA                    | Hypermethylated in FP vs FN |
| cg22288798 | 0.772   | 0.476   | 0.296     | 1e-06            | NA                    | Hypermethylated in FP vs FN |
| cg10784570 | 0.711   | 0.252   | 0.459     | 1e-06            | NA                    | Hypermethylated in FP vs FN |
| cg05188868 | 0.539   | 0.137   | 0.402     | 1e-06            | ENC1                  | Hypermethylated in FP vs FN |
| cg16012719 | 0.517   | 0.150   | 0.367     | 1e-06            | NA                    | Hypermethylated in FP vs FN |
| cg03612914 | 0.823   | 0.548   | 0.275     | 1e-06            | NA                    | Hypermethylated in FP vs FN |
| cg04751089 | 0.549   | 0.252   | 0.297     | 1e-06            | NA                    | Hypermethylated in FP vs FN |
| cg03479705 | 0.502   | 0.235   | 0.267     | 1e-06            | NA                    | Hypermethylated in FP vs FN |
| cg13223209 | 0.600   | 0.273   | 0.327     | 1e-06            | NA                    | Hypermethylated in FP vs FN |
| cg26631039 | 0.632   | 0.179   | 0.453     | 1e-06            | NA                    | Hypermethylated in FP vs FN |
| cg24935042 | 0.459   | 0.203   | 0.256     | 1e-06            | CMPK2                 | Hypermethylated in FP vs FN |
| cg24901488 | 0.821   | 0.496   | 0.324     | 1e-06            | NA                    | Hypermethylated in FP vs FN |
| cg18259003 | 0.685   | 0.251   | 0.434     | 1e-06            | NA                    | Hypermethylated in FP vs FN |
| cg13038847 | 0.792   | 0.448   | 0.344     | 1e-06            | NA                    | Hypermethylated in FP vs FN |
| cg02048412 | 0.626   | 0.240   | 0.386     | 1e-06            | VASN                  | Hypermethylated in FP vs FN |
| cg24841318 | 0.720   | 0.351   | 0.369     | 1e-06            | PROCA1                | Hypermethylated in FP vs FN |
| cg14507310 | 0.623   | 0.283   | 0.339     | 1e-06            | NA                    | Hypermethylated in FP vs FN |
| cg26450860 | 0.527   | 0.195   | 0.332     | 1e-06            | NA                    | Hypermethylated in FP vs FN |
| cg24075113 | 0.433   | 0.110   | 0.322     | 1e-06            | NA                    | Hypermethylated in FP vs FN |
| cg24289821 | 0.775   | 0.479   | 0.296     | 1e-06            | NA                    | Hypermethylated in FP vs FN |
| cg24061122 | 0.622   | 0.336   | 0.286     | 1e-06            | FAM53C                | Hypermethylated in FP vs FN |
| cg22084182 | 0.836   | 0.580   | 0.256     | 1e-06            | NA                    | Hypermethylated in FP vs FN |

### Supplementary Table 7 (continued)

| Probe      | FP.mean | FN.mean | Mean.diff | Adjusted.P.value | Promoter.related.gene | Category                    |
|------------|---------|---------|-----------|------------------|-----------------------|-----------------------------|
| cg07324702 | 0.790   | 0.419   | 0.371     | 1e-06            | NA                    | Hypermethylated in FP vs FN |
| cg15843262 | 0.439   | 0.101   | 0.338     | 1e-06            | NA                    | Hypermethylated in FP vs FN |
| cg04375036 | 0.788   | 0.520   | 0.268     | 1e-06            | PPP1CC                | Hypermethylated in FP vs FN |
| cg05399036 | 0.734   | 0.443   | 0.291     | 1e-06            | NA                    | Hypermethylated in FP vs FN |
| cg13214162 | 0.772   | 0.388   | 0.384     | 1e-06            | NA                    | Hypermethylated in FP vs FN |
| cg04949225 | 0.486   | 0.222   | 0.263     | 1e-06            | NA                    | Hypermethylated in FP vs FN |
| cg22193276 | 0.777   | 0.522   | 0.256     | 1e-06            | NA                    | Hypermethylated in FP vs FN |
| cg09526758 | 0.578   | 0.199   | 0.379     | 1e-06            | NA                    | Hypermethylated in FP vs FN |
| cg19505659 | 0.800   | 0.507   | 0.293     | 1e-06            | NA                    | Hypermethylated in FP vs FN |
| cg23528037 | 0.819   | 0.495   | 0.324     | 1e-06            | TMEM88                | Hypermethylated in FP vs FN |
| cg10218546 | 0.798   | 0.493   | 0.305     | 1e-06            | NA                    | Hypermethylated in FP vs FN |
| cg23416197 | 0.626   | 0.235   | 0.391     | 1e-06            | NA                    | Hypermethylated in FP vs FN |
| cg09923954 | 0.592   | 0.323   | 0.269     | 1e-06            | NA                    | Hypermethylated in FP vs FN |
| cg13056369 | 0.664   | 0.312   | 0.352     | 1e-06            | NA                    | Hypermethylated in FP vs FN |
| cg04010471 | 0.375   | 0.075   | 0.300     | 1e-06            | NA                    | Hypermethylated in FP vs FN |
| cg26710371 | 0.691   | 0.431   | 0.260     | 1e-06            | NA                    | Hypermethylated in FP vs FN |
| cg01613249 | 0.746   | 0.409   | 0.337     | 1e-06            | NA                    | Hypermethylated in FP vs FN |
| cg17073733 | 0.567   | 0.200   | 0.367     | 1e-06            | NA                    | Hypermethylated in FP vs FN |
| cg08446346 | 0.857   | 0.590   | 0.267     | 1e-06            | NA                    | Hypermethylated in FP vs FN |
| cg15821496 | 0.862   | 0.556   | 0.306     | 1e-06            | NA                    | Hypermethylated in FP vs FN |
| cg23873525 | 0.722   | 0.363   | 0.359     | 2e-06            | NA                    | Hypermethylated in FP vs FN |
| cg16793394 | 0.750   | 0.341   | 0.410     | 2e-06            | OTX2                  | Hypermethylated in FP vs FN |
| cg12860686 | 0.700   | 0.279   | 0.420     | 2e-06            | NA                    | Hypermethylated in FP vs FN |
| cg01637404 | 0.635   | 0.297   | 0.338     | 2e-06            | NA                    | Hypermethylated in FP vs FN |
| cg26267310 | 0.636   | 0.263   | 0.373     | 2e-06            | HSD17B14              | Hypermethylated in FP vs FN |

### Supplementary Table 7 (continued)

| Probe      | FP.mean | FN.mean | Mean.diff | Adjusted.P.value | Promoter.related.gene | Category                    |
|------------|---------|---------|-----------|------------------|-----------------------|-----------------------------|
| cg22626525 | 0.607   | 0.295   | 0.311     | 2e-06            | NA                    | Hypermethylated in FP vs FN |
| cg03907855 | 0.938   | 0.687   | 0.251     | 2e-06            | NA                    | Hypermethylated in FP vs FN |
| cg23684449 | 0.787   | 0.523   | 0.264     | 2e-06            | GPT2                  | Hypermethylated in FP vs FN |
| cg24974704 | 0.615   | 0.254   | 0.361     | 2e-06            | NA                    | Hypermethylated in FP vs FN |
| cg06163425 | 0.420   | 0.161   | 0.259     | 2e-06            | NA                    | Hypermethylated in FP vs FN |
| cg02355680 | 0.823   | 0.484   | 0.339     | 2e-06            | NA                    | Hypermethylated in FP vs FN |
| cg04223863 | 0.602   | 0.308   | 0.294     | 2e-06            | NA                    | Hypermethylated in FP vs FN |
| cg26195495 | 0.743   | 0.379   | 0.364     | 2e-06            | NA                    | Hypermethylated in FP vs FN |
| cg00110688 | 0.371   | 0.120   | 0.250     | 2e-06            | NUDT4_NUDT4P1         | Hypermethylated in FP vs FN |
| cg04944806 | 0.407   | 0.065   | 0.342     | 2e-06            | NA                    | Hypermethylated in FP vs FN |
| cg14306344 | 0.817   | 0.522   | 0.295     | 2e-06            | NA                    | Hypermethylated in FP vs FN |
| cg26620314 | 0.813   | 0.548   | 0.265     | 2e-06            | NA                    | Hypermethylated in FP vs FN |
| cg22509138 | 0.632   | 0.335   | 0.297     | 2e-06            | NA                    | Hypermethylated in FP vs FN |
| cg00443981 | 0.819   | 0.497   | 0.322     | 2e-06            | C17orf64              | Hypermethylated in FP vs FN |
| cg05967710 | 0.842   | 0.542   | 0.300     | 2e-06            | NA                    | Hypermethylated in FP vs FN |
| cg17480467 | 0.734   | 0.272   | 0.462     | 2e-06            | NA                    | Hypermethylated in FP vs FN |
| cg02637247 | 0.711   | 0.387   | 0.323     | 2e-06            | NA                    | Hypermethylated in FP vs FN |
| cg05229649 | 0.724   | 0.332   | 0.391     | 2e-06            | NA                    | Hypermethylated in FP vs FN |
| cg14701122 | 0.700   | 0.423   | 0.277     | 2e-06            | NA                    | Hypermethylated in FP vs FN |
| cg13385568 | 0.868   | 0.574   | 0.294     | 2e-06            | NA                    | Hypermethylated in FP vs FN |
| cg25433316 | 0.405   | 0.138   | 0.266     | 2e-06            | NA                    | Hypermethylated in FP vs FN |
| cg09832613 | 0.754   | 0.421   | 0.333     | 2e-06            | NA                    | Hypermethylated in FP vs FN |
| cg14812313 | 0.909   | 0.635   | 0.274     | 2e-06            | NA                    | Hypermethylated in FP vs FN |
| cg16844941 | 0.658   | 0.270   | 0.388     | 2e-06            | NA                    | Hypermethylated in FP vs FN |
| cg11892345 | 0.896   | 0.637   | 0.259     | 2e-06            | NA                    | Hypermethylated in FP vs FN |



### Supplementary Table 7 (continued)

| Probe      | FP.mean | FN.mean | Mean.diff | Adjusted.P.value | Promoter.related.gene | Category                    |
|------------|---------|---------|-----------|------------------|-----------------------|-----------------------------|
| cg06204745 | 0.612   | 0.150   | 0.462     | 2e-06            | NA                    | Hypermethylated in FP vs FN |
| cg27634264 | 0.696   | 0.362   | 0.334     | 2e-06            | NA                    | Hypermethylated in FP vs FN |
| cg13385220 | 0.835   | 0.473   | 0.362     | 2e-06            | NA                    | Hypermethylated in FP vs FN |
| cg00157016 | 0.849   | 0.585   | 0.264     | 2e-06            | NA                    | Hypermethylated in FP vs FN |
| cg15331383 | 0.605   | 0.283   | 0.321     | 2e-06            | NA                    | Hypermethylated in FP vs FN |
| cg09011891 | 0.565   | 0.299   | 0.267     | 2e-06            | NA                    | Hypermethylated in FP vs FN |
| cg18450555 | 0.421   | 0.100   | 0.322     | 2e-06            | FBRSL1                | Hypermethylated in FP vs FN |
| cg24476826 | 0.659   | 0.368   | 0.291     | 2e-06            | NA                    | Hypermethylated in FP vs FN |
| cg13954292 | 0.893   | 0.593   | 0.300     | 2e-06            | ZFR                   | Hypermethylated in FP vs FN |
| cg18103043 | 0.822   | 0.556   | 0.265     | 2e-06            | NCRNA00176            | Hypermethylated in FP vs FN |
| cg24453118 | 0.727   | 0.397   | 0.330     | 2e-06            | NA                    | Hypermethylated in FP vs FN |
| cg16616971 | 0.703   | 0.378   | 0.325     | 2e-06            | NA                    | Hypermethylated in FP vs FN |
| cg13221347 | 0.679   | 0.280   | 0.399     | 2e-06            | NA                    | Hypermethylated in FP vs FN |
| cg07668501 | 0.466   | 0.130   | 0.336     | 2e-06            | NA                    | Hypermethylated in FP vs FN |
| cg04115307 | 0.751   | 0.491   | 0.260     | 2e-06            | NA                    | Hypermethylated in FP vs FN |
| cg27638615 | 0.627   | 0.300   | 0.326     | 2e-06            | FZD7                  | Hypermethylated in FP vs FN |
| cg06266189 | 0.689   | 0.337   | 0.352     | 2e-06            | NA                    | Hypermethylated in FP vs FN |
| cg00455523 | 0.667   | 0.371   | 0.297     | 2e-06            | NA                    | Hypermethylated in FP vs FN |
| cg01870865 | 0.710   | 0.333   | 0.377     | 2e-06            | TREX1                 | Hypermethylated in FP vs FN |
| cg07357827 | 0.651   | 0.334   | 0.317     | 2e-06            | TIMP4                 | Hypermethylated in FP vs FN |
| cg26779985 | 0.640   | 0.287   | 0.353     | 2e-06            | NA                    | Hypermethylated in FP vs FN |
| cg13750264 | 0.739   | 0.425   | 0.314     | 2e-06            | NA                    | Hypermethylated in FP vs FN |
| cg26277599 | 0.750   | 0.437   | 0.313     | 2e-06            | NA                    | Hypermethylated in FP vs FN |
| cg11283983 | 0.581   | 0.300   | 0.281     | 2e-06            | SLC1A3                | Hypermethylated in FP vs FN |
| cg00532802 | 0.579   | 0.193   | 0.386     | 2e-06            | NA                    | Hypermethylated in FP vs FN |

### Supplementary Table 7 (continued)

| Probe      | FP.mean | FN.mean | Mean.diff | Adjusted.P.value | Promoter.related.gene | Category                    |
|------------|---------|---------|-----------|------------------|-----------------------|-----------------------------|
| cg16296754 | 0.581   | 0.160   | 0.422     | 2e-06            | NA                    | Hypermethylated in FP vs FN |
| cg22462235 | 0.613   | 0.328   | 0.285     | 2e-06            | LEFTY2                | Hypermethylated in FP vs FN |
| cg26887085 | 0.860   | 0.598   | 0.262     | 2e-06            | CNR1                  | Hypermethylated in FP vs FN |
| cg01395754 | 0.777   | 0.494   | 0.283     | 2e-06            | NA                    | Hypermethylated in FP vs FN |
| cg16964478 | 0.812   | 0.458   | 0.353     | 2e-06            | NA                    | Hypermethylated in FP vs FN |
| cg23605284 | 0.775   | 0.431   | 0.344     | 2e-06            | NA                    | Hypermethylated in FP vs FN |
| cg15695155 | 0.841   | 0.539   | 0.302     | 2e-06            | NA                    | Hypermethylated in FP vs FN |
| cg10069121 | 0.569   | 0.307   | 0.262     | 2e-06            | S100A11               | Hypermethylated in FP vs FN |
| cg10835417 | 0.864   | 0.599   | 0.265     | 2e-06            | NA                    | Hypermethylated in FP vs FN |
| cg27260684 | 0.786   | 0.438   | 0.349     | 2e-06            | NA                    | Hypermethylated in FP vs FN |
| cg13302994 | 0.491   | 0.217   | 0.274     | 2e-06            | NA                    | Hypermethylated in FP vs FN |
| cg26511108 | 0.586   | 0.297   | 0.289     | 2e-06            | BMI1                  | Hypermethylated in FP vs FN |
| cg20811607 | 0.873   | 0.541   | 0.332     | 2e-06            | SMPD2                 | Hypermethylated in FP vs FN |
| cg00509187 | 0.706   | 0.442   | 0.263     | 2e-06            | ENOX1                 | Hypermethylated in FP vs FN |
| cg26112871 | 0.659   | 0.332   | 0.327     | 2e-06            | NA                    | Hypermethylated in FP vs FN |
| cg05220968 | 0.676   | 0.357   | 0.318     | 2e-06            | EPM2A                 | Hypermethylated in FP vs FN |
| cg17400113 | 0.766   | 0.471   | 0.295     | 2e-06            | RGMA                  | Hypermethylated in FP vs FN |
| cg25839439 | 0.828   | 0.507   | 0.321     | 2e-06            | NA                    | Hypermethylated in FP vs FN |
| cg03218479 | 0.745   | 0.485   | 0.261     | 2e-06            | NA                    | Hypermethylated in FP vs FN |
| cg23700278 | 0.659   | 0.308   | 0.351     | 2e-06            | NA                    | Hypermethylated in FP vs FN |
| cg11252310 | 0.605   | 0.320   | 0.285     | 2e-06            | NA                    | Hypermethylated in FP vs FN |
| cg15455864 | 0.414   | 0.124   | 0.291     | 2e-06            | RSPH6A                | Hypermethylated in FP vs FN |
| cg16496024 | 0.792   | 0.497   | 0.295     | 2e-06            | PCP4                  | Hypermethylated in FP vs FN |
| cg05116002 | 0.717   | 0.445   | 0.272     | 2e-06            | NA                    | Hypermethylated in FP vs FN |
| cg19824833 | 0.703   | 0.413   | 0.290     | 2e-06            | NA                    | Hypermethylated in FP vs FN |

### Supplementary Table 7 (continued)

| Probe      | FP.mean | FN.mean | Mean.diff | Adjusted.P.value | Promoter.related.gene | Category                    |
|------------|---------|---------|-----------|------------------|-----------------------|-----------------------------|
| cg13719443 | 0.563   | 0.260   | 0.303     | 2e-06            | NA                    | Hypermethylated in FP vs FN |
| cg24851651 | 0.748   | 0.485   | 0.263     | 2e-06            | NA                    | Hypermethylated in FP vs FN |
| cg06320828 | 0.708   | 0.332   | 0.376     | 2e-06            | NA                    | Hypermethylated in FP vs FN |
| cg25221239 | 0.787   | 0.418   | 0.370     | 2e-06            | NA                    | Hypermethylated in FP vs FN |
| cg19100779 | 0.810   | 0.532   | 0.278     | 2e-06            | ASB4                  | Hypermethylated in FP vs FN |
| cg13870539 | 0.695   | 0.398   | 0.297     | 2e-06            | PLCE1                 | Hypermethylated in FP vs FN |
| cg04371130 | 0.733   | 0.441   | 0.292     | 2e-06            | NA                    | Hypermethylated in FP vs FN |
| cg05455971 | 0.871   | 0.537   | 0.333     | 2e-06            | NA                    | Hypermethylated in FP vs FN |
| cg18403673 | 0.679   | 0.298   | 0.382     | 2e-06            | NA                    | Hypermethylated in FP vs FN |
| cg12763668 | 0.789   | 0.531   | 0.258     | 2e-06            | NA                    | Hypermethylated in FP vs FN |
| cg06392241 | 0.407   | 0.150   | 0.257     | 2e-06            | NUDT4_NUDT4P1         | Hypermethylated in FP vs FN |
| cg23890800 | 0.557   | 0.130   | 0.427     | 2e-06            | FBRSL1                | Hypermethylated in FP vs FN |
| cg07114886 | 0.605   | 0.305   | 0.299     | 2e-06            | NA                    | Hypermethylated in FP vs FN |
| cg03083146 | 0.865   | 0.566   | 0.299     | 2e-06            | NA                    | Hypermethylated in FP vs FN |
| cg23671708 | 0.708   | 0.378   | 0.330     | 2e-06            | TMEM88                | Hypermethylated in FP vs FN |
| cg18200150 | 0.694   | 0.386   | 0.309     | 2e-06            | NA                    | Hypermethylated in FP vs FN |
| cg15358549 | 0.869   | 0.535   | 0.333     | 2e-06            | NA                    | Hypermethylated in FP vs FN |
| cg09888283 | 0.674   | 0.403   | 0.271     | 2e-06            | NA                    | Hypermethylated in FP vs FN |
| cg02840964 | 0.692   | 0.429   | 0.263     | 2e-06            | NA                    | Hypermethylated in FP vs FN |
| cg09130674 | 0.639   | 0.347   | 0.292     | 2e-06            | NA                    | Hypermethylated in FP vs FN |
| cg21649828 | 0.784   | 0.486   | 0.298     | 2e-06            | NA                    | Hypermethylated in FP vs FN |
| cg02524863 | 0.645   | 0.282   | 0.362     | 2e-06            | NA                    | Hypermethylated in FP vs FN |
| cg23171099 | 0.810   | 0.434   | 0.376     | 2e-06            | NA                    | Hypermethylated in FP vs FN |
| cg12629515 | 0.673   | 0.366   | 0.307     | 2e-06            | HIST1H3J_HIST1H2BO    | Hypermethylated in FP vs FN |
| cg10585661 | 0.741   | 0.374   | 0.367     | 2e-06            | NA                    | Hypermethylated in FP vs FN |

### Supplementary Table 7 (continued)

| Probe      | FP.mean | FN.mean | Mean.diff | Adjusted.P.value | Promoter.related.gene | Category                    |
|------------|---------|---------|-----------|------------------|-----------------------|-----------------------------|
| cg26069353 | 0.613   | 0.282   | 0.331     | 2e-06            | COCH                  | Hypermethylated in FP vs FN |
| cg00839129 | 0.608   | 0.288   | 0.320     | 2e-06            | NA                    | Hypermethylated in FP vs FN |
| cg17049418 | 0.669   | 0.381   | 0.288     | 2e-06            | NA                    | Hypermethylated in FP vs FN |
| cg01539484 | 0.801   | 0.539   | 0.262     | 2e-06            | NA                    | Hypermethylated in FP vs FN |
| cg02989257 | 0.778   | 0.473   | 0.306     | 2e-06            | NA                    | Hypermethylated in FP vs FN |
| cg19927885 | 0.745   | 0.392   | 0.353     | 2e-06            | LPIN3                 | Hypermethylated in FP vs FN |
| cg23117647 | 0.726   | 0.395   | 0.332     | 2e-06            | NA                    | Hypermethylated in FP vs FN |
| cg08231870 | 0.747   | 0.318   | 0.430     | 2e-06            | NA                    | Hypermethylated in FP vs FN |
| cg10078639 | 0.552   | 0.237   | 0.315     | 2e-06            | ABLIM1                | Hypermethylated in FP vs FN |
| cg14081465 | 0.676   | 0.260   | 0.416     | 2e-06            | NA                    | Hypermethylated in FP vs FN |
| cg06759255 | 0.674   | 0.392   | 0.282     | 2e-06            | NA                    | Hypermethylated in FP vs FN |
| cg08814536 | 0.538   | 0.275   | 0.263     | 2e-06            | NA                    | Hypermethylated in FP vs FN |
| cg00830086 | 0.786   | 0.480   | 0.306     | 2e-06            | NA                    | Hypermethylated in FP vs FN |
| cg06441398 | 0.773   | 0.475   | 0.298     | 2e-06            | NA                    | Hypermethylated in FP vs FN |
| cg07044938 | 0.834   | 0.574   | 0.260     | 2e-06            | NA                    | Hypermethylated in FP vs FN |
| cg16254394 | 0.514   | 0.198   | 0.316     | 2e-06            | DIO2                  | Hypermethylated in FP vs FN |
| cg21249771 | 0.677   | 0.413   | 0.263     | 2e-06            | NA                    | Hypermethylated in FP vs FN |
| cg21583016 | 0.621   | 0.303   | 0.318     | 2e-06            | NA                    | Hypermethylated in FP vs FN |
| cg07869907 | 0.794   | 0.471   | 0.323     | 2e-06            | NA                    | Hypermethylated in FP vs FN |
| cg12774946 | 0.713   | 0.352   | 0.361     | 2e-06            | NA                    | Hypermethylated in FP vs FN |
| cg13408752 | 0.773   | 0.422   | 0.351     | 2e-06            | NA                    | Hypermethylated in FP vs FN |
| cg14894097 | 0.596   | 0.273   | 0.323     | 2e-06            | NA                    | Hypermethylated in FP vs FN |
| cg23418102 | 0.799   | 0.467   | 0.331     | 2e-06            | NA                    | Hypermethylated in FP vs FN |
| cg11332928 | 0.594   | 0.262   | 0.332     | 2e-06            | BTBD19_TCTEX1D4       | Hypermethylated in FP vs FN |
| cg26980692 | 0.591   | 0.322   | 0.269     | 2e-06            | SLC15A3               | Hypermethylated in FP vs FN |

### Supplementary Table 7 (continued)

| Probe      | FP.mean | FN.mean | Mean.diff | Adjusted.P.value | Promoter.related.gene | Category                    |
|------------|---------|---------|-----------|------------------|-----------------------|-----------------------------|
| cg25412546 | 0.553   | 0.201   | 0.353     | 2e-06            | NA                    | Hypermethylated in FP vs FN |
| cg01024303 | 0.805   | 0.539   | 0.265     | 2e-06            | NA                    | Hypermethylated in FP vs FN |
| cg18443437 | 0.607   | 0.277   | 0.331     | 2e-06            | NA                    | Hypermethylated in FP vs FN |
| cg03793625 | 0.460   | 0.193   | 0.267     | 2e-06            | NA                    | Hypermethylated in FP vs FN |
| cg17726720 | 0.808   | 0.462   | 0.347     | 2e-06            | NA                    | Hypermethylated in FP vs FN |
| cg10264791 | 0.755   | 0.501   | 0.255     | 2e-06            | NA                    | Hypermethylated in FP vs FN |
| cg24340081 | 0.718   | 0.345   | 0.373     | 2e-06            | NA                    | Hypermethylated in FP vs FN |
| cg15227522 | 0.813   | 0.536   | 0.277     | 2e-06            | NA                    | Hypermethylated in FP vs FN |
| cg22778120 | 0.557   | 0.301   | 0.257     | 2e-06            | NA                    | Hypermethylated in FP vs FN |
| cg26942124 | 0.676   | 0.323   | 0.353     | 2e-06            | ZNF608                | Hypermethylated in FP vs FN |
| cg11239749 | 0.718   | 0.388   | 0.329     | 2e-06            | NA                    | Hypermethylated in FP vs FN |
| cg14331765 | 0.543   | 0.271   | 0.272     | 2e-06            | NA                    | Hypermethylated in FP vs FN |
| cg07041720 | 0.553   | 0.269   | 0.284     | 2e-06            | LFNG                  | Hypermethylated in FP vs FN |
| cg20128323 | 0.638   | 0.378   | 0.260     | 2e-06            | NA                    | Hypermethylated in FP vs FN |
| cg07196637 | 0.802   | 0.519   | 0.283     | 2e-06            | F11                   | Hypermethylated in FP vs FN |
| cg04621728 | 0.746   | 0.455   | 0.291     | 2e-06            | NA                    | Hypermethylated in FP vs FN |
| cg14676825 | 0.674   | 0.264   | 0.410     | 2e-06            | PROCA1                | Hypermethylated in FP vs FN |
| cg18539461 | 0.770   | 0.353   | 0.418     | 2e-06            | NA                    | Hypermethylated in FP vs FN |
| cg02896757 | 0.479   | 0.216   | 0.263     | 2e-06            | NA                    | Hypermethylated in FP vs FN |
| cg14288335 | 0.735   | 0.459   | 0.277     | 2e-06            | NA                    | Hypermethylated in FP vs FN |
| cg01139503 | 0.780   | 0.489   | 0.291     | 2e-06            | NA                    | Hypermethylated in FP vs FN |
| cg22698744 | 0.780   | 0.333   | 0.447     | 2e-06            | NA                    | Hypermethylated in FP vs FN |
| cg16802855 | 0.893   | 0.613   | 0.280     | 2e-06            | NA                    | Hypermethylated in FP vs FN |
| cg19225602 | 0.678   | 0.348   | 0.330     | 2e-06            | NA                    | Hypermethylated in FP vs FN |
| cg01312445 | 0.707   | 0.356   | 0.351     | 2e-06            | NA                    | Hypermethylated in FP vs FN |

### Supplementary Table 7 (continued)

| Probe      | FP.mean | FN.mean | Mean.diff | Adjusted.P.value | Promoter.related.gene | Category                    |
|------------|---------|---------|-----------|------------------|-----------------------|-----------------------------|
| cg08826839 | 0.512   | 0.240   | 0.272     | 2e-06            | FAP                   | Hypermethylated in FP vs FN |
| cg24180162 | 0.617   | 0.341   | 0.275     | 2e-06            | HILS1                 | Hypermethylated in FP vs FN |
| cg06027254 | 0.674   | 0.310   | 0.364     | 2e-06            | NA                    | Hypermethylated in FP vs FN |
| cg14009632 | 0.648   | 0.367   | 0.281     | 2e-06            | TJAP1                 | Hypermethylated in FP vs FN |
| cg05325480 | 0.704   | 0.428   | 0.276     | 2e-06            | NA                    | Hypermethylated in FP vs FN |
| cg03278271 | 0.826   | 0.525   | 0.301     | 2e-06            | NA                    | Hypermethylated in FP vs FN |
| cg21479131 | 0.578   | 0.307   | 0.271     | 2e-06            | NA                    | Hypermethylated in FP vs FN |
| cg18098769 | 0.739   | 0.424   | 0.315     | 2e-06            | NA                    | Hypermethylated in FP vs FN |
| cg00370303 | 0.542   | 0.125   | 0.417     | 2e-06            | FBRSL1                | Hypermethylated in FP vs FN |
| cg17161421 | 0.663   | 0.384   | 0.279     | 2e-06            | PRRT1_PPT2            | Hypermethylated in FP vs FN |
| cg16365842 | 0.692   | 0.360   | 0.332     | 2e-06            | NA                    | Hypermethylated in FP vs FN |
| cg27516404 | 0.636   | 0.354   | 0.283     | 2e-06            | NA                    | Hypermethylated in FP vs FN |
| cg25981350 | 0.667   | 0.340   | 0.327     | 2e-06            | NA                    | Hypermethylated in FP vs FN |
| cg17713161 | 0.765   | 0.428   | 0.337     | 2e-06            | NA                    | Hypermethylated in FP vs FN |
| cg02685896 | 0.612   | 0.212   | 0.401     | 2e-06            | PROCA1                | Hypermethylated in FP vs FN |
| cg24569831 | 0.806   | 0.451   | 0.355     | 2e-06            | RGMA                  | Hypermethylated in FP vs FN |
| cg18027683 | 0.571   | 0.257   | 0.314     | 2e-06            | NA                    | Hypermethylated in FP vs FN |
| cg26927190 | 0.464   | 0.166   | 0.298     | 2e-06            | NA                    | Hypermethylated in FP vs FN |
| cg03323462 | 0.584   | 0.217   | 0.368     | 2e-06            | NA                    | Hypermethylated in FP vs FN |
| cg10054197 | 0.484   | 0.109   | 0.375     | 2e-06            | NA                    | Hypermethylated in FP vs FN |
| cg06800222 | 0.734   | 0.441   | 0.293     | 2e-06            | NA                    | Hypermethylated in FP vs FN |
| cg05698228 | 0.445   | 0.101   | 0.344     | 2e-06            | ENC1                  | Hypermethylated in FP vs FN |
| cg07277633 | 0.685   | 0.320   | 0.365     | 2e-06            | NA                    | Hypermethylated in FP vs FN |
| cg02993069 | 0.478   | 0.184   | 0.294     | 2e-06            | NA                    | Hypermethylated in FP vs FN |
| cg04154903 | 0.501   | 0.122   | 0.379     | 2e-06            | NA                    | Hypermethylated in FP vs FN |

### Supplementary Table 7 (continued)

| Probe      | FP.mean | FN.mean | Mean.diff | Adjusted.P.value | Promoter.related.gene | Category                    |
|------------|---------|---------|-----------|------------------|-----------------------|-----------------------------|
| cg23766996 | 0.812   | 0.510   | 0.302     | 3e-06            | GRM3                  | Hypermethylated in FP vs FN |
| cg01038750 | 0.451   | 0.167   | 0.284     | 3e-06            | RBMS3                 | Hypermethylated in FP vs FN |
| cg02538199 | 0.392   | 0.126   | 0.266     | 3e-06            | PAX5                  | Hypermethylated in FP vs FN |
| cg05038469 | 0.695   | 0.383   | 0.312     | 3e-06            | NA                    | Hypermethylated in FP vs FN |
| cg09091185 | 0.808   | 0.512   | 0.296     | 3e-06            | NA                    | Hypermethylated in FP vs FN |
| cg08993690 | 0.724   | 0.433   | 0.292     | 3e-06            | NA                    | Hypermethylated in FP vs FN |
| cg03555157 | 0.623   | 0.302   | 0.321     | 3e-06            | LIMS2                 | Hypermethylated in FP vs FN |
| cg16702747 | 0.846   | 0.545   | 0.301     | 3e-06            | NA                    | Hypermethylated in FP vs FN |
| cg00079219 | 0.498   | 0.174   | 0.324     | 3e-06            | NA                    | Hypermethylated in FP vs FN |
| cg20153196 | 0.539   | 0.190   | 0.349     | 3e-06            | NA                    | Hypermethylated in FP vs FN |
| cg22009908 | 0.587   | 0.287   | 0.300     | 3e-06            | NA                    | Hypermethylated in FP vs FN |
| cg01309213 | 0.772   | 0.452   | 0.320     | 3e-06            | PDIA2                 | Hypermethylated in FP vs FN |
| cg01798385 | 0.743   | 0.485   | 0.258     | 3e-06            | NA                    | Hypermethylated in FP vs FN |
| cg06197769 | 0.478   | 0.222   | 0.256     | 3e-06            | CDKN1B                | Hypermethylated in FP vs FN |
| cg01512719 | 0.888   | 0.559   | 0.330     | 3e-06            | NA                    | Hypermethylated in FP vs FN |
| cg02481307 | 0.675   | 0.394   | 0.282     | 3e-06            | LETM1                 | Hypermethylated in FP vs FN |
| cg24898738 | 0.850   | 0.504   | 0.346     | 3e-06            | NA                    | Hypermethylated in FP vs FN |
| cg21887097 | 0.566   | 0.312   | 0.254     | 3e-06            | NA                    | Hypermethylated in FP vs FN |
| cg02240539 | 0.739   | 0.416   | 0.323     | 3e-06            | NA                    | Hypermethylated in FP vs FN |
| cg08870093 | 0.607   | 0.283   | 0.324     | 3e-06            | NA                    | Hypermethylated in FP vs FN |
| cg07888912 | 0.614   | 0.329   | 0.285     | 3e-06            | KANK2                 | Hypermethylated in FP vs FN |
| cg23360019 | 0.747   | 0.419   | 0.328     | 3e-06            | NA                    | Hypermethylated in FP vs FN |
| cg06979020 | 0.597   | 0.344   | 0.253     | 3e-06            | NA                    | Hypermethylated in FP vs FN |
| cg11601254 | 0.800   | 0.448   | 0.352     | 3e-06            | NA                    | Hypermethylated in FP vs FN |
| cg02750065 | 0.587   | 0.281   | 0.306     | 3e-06            | NA                    | Hypermethylated in FP vs FN |

### Supplementary Table 7 (continued)

| Probe      | FP.mean | FN.mean | Mean.diff | Adjusted.P.value | Promoter.related.gene | Category                    |
|------------|---------|---------|-----------|------------------|-----------------------|-----------------------------|
| cg10059959 | 0.425   | 0.124   | 0.301     | 3e-06            | PAX5                  | Hypermethylated in FP vs FN |
| cg21810004 | 0.829   | 0.567   | 0.262     | 3e-06            | NA                    | Hypermethylated in FP vs FN |
| cg10813544 | 0.401   | 0.089   | 0.313     | 3e-06            | NA                    | Hypermethylated in FP vs FN |
| cg04123578 | 0.628   | 0.375   | 0.253     | 3e-06            | NA                    | Hypermethylated in FP vs FN |
| cg09963814 | 0.692   | 0.403   | 0.289     | 3e-06            | NA                    | Hypermethylated in FP vs FN |
| cg23154832 | 0.792   | 0.502   | 0.290     | 3e-06            | NA                    | Hypermethylated in FP vs FN |
| cg09920605 | 0.677   | 0.385   | 0.292     | 3e-06            | NA                    | Hypermethylated in FP vs FN |
| cg04783764 | 0.739   | 0.449   | 0.289     | 3e-06            | NA                    | Hypermethylated in FP vs FN |
| cg02172819 | 0.551   | 0.301   | 0.251     | 3e-06            | NA                    | Hypermethylated in FP vs FN |
| cg07872300 | 0.843   | 0.574   | 0.269     | 3e-06            | NA                    | Hypermethylated in FP vs FN |
| cg04291946 | 0.677   | 0.410   | 0.267     | 3e-06            | NA                    | Hypermethylated in FP vs FN |
| cg27196808 | 0.446   | 0.104   | 0.341     | 3e-06            | WNT1                  | Hypermethylated in FP vs FN |
| cg00106345 | 0.766   | 0.331   | 0.435     | 3e-06            | NA                    | Hypermethylated in FP vs FN |
| cg19107264 | 0.803   | 0.508   | 0.295     | 3e-06            | NA                    | Hypermethylated in FP vs FN |
| cg05353884 | 0.811   | 0.406   | 0.405     | 3e-06            | NA                    | Hypermethylated in FP vs FN |
| cg18512156 | 0.457   | 0.139   | 0.319     | 3e-06            | NKX2-5                | Hypermethylated in FP vs FN |
| cg03565240 | 0.899   | 0.619   | 0.280     | 3e-06            | NA                    | Hypermethylated in FP vs FN |
| cg14480035 | 0.692   | 0.436   | 0.256     | 3e-06            | NA                    | Hypermethylated in FP vs FN |
| cg05929767 | 0.665   | 0.397   | 0.268     | 3e-06            | NA                    | Hypermethylated in FP vs FN |
| cg11711816 | 0.727   | 0.372   | 0.355     | 3e-06            | NA                    | Hypermethylated in FP vs FN |
| cg11845292 | 0.696   | 0.423   | 0.273     | 3e-06            | NA                    | Hypermethylated in FP vs FN |
| cg25304198 | 0.658   | 0.359   | 0.299     | 3e-06            | NA                    | Hypermethylated in FP vs FN |
| cg26539468 | 0.775   | 0.507   | 0.268     | 3e-06            | NA                    | Hypermethylated in FP vs FN |
| cg18501230 | 0.759   | 0.470   | 0.289     | 3e-06            | NA                    | Hypermethylated in FP vs FN |
| cg08814105 | 0.514   | 0.125   | 0.389     | 3e-06            | NKX2-5                | Hypermethylated in FP vs FN |



### Supplementary Table 7 (continued)

| Probe      | FP.mean | FN.mean | Mean.diff | Adjusted.P.value | Promoter.related.gene | Category                    |
|------------|---------|---------|-----------|------------------|-----------------------|-----------------------------|
| cg03794617 | 0.835   | 0.503   | 0.332     | 3e-06            | NA                    | Hypermethylated in FP vs FN |
| cg05254651 | 0.746   | 0.495   | 0.252     | 3e-06            | NA                    | Hypermethylated in FP vs FN |
| cg04050824 | 0.783   | 0.382   | 0.401     | 3e-06            | NA                    | Hypermethylated in FP vs FN |
| cg22632756 | 0.584   | 0.298   | 0.286     | 3e-06            | PNOC                  | Hypermethylated in FP vs FN |
| cg18082515 | 0.531   | 0.212   | 0.319     | 3e-06            | NA                    | Hypermethylated in FP vs FN |
| cg23218957 | 0.565   | 0.313   | 0.252     | 3e-06            | NA                    | Hypermethylated in FP vs FN |
| cg02532341 | 0.549   | 0.229   | 0.320     | 3e-06            | NA                    | Hypermethylated in FP vs FN |
| cg08012275 | 0.864   | 0.499   | 0.365     | 3e-06            | NA                    | Hypermethylated in FP vs FN |
| cg12509499 | 0.843   | 0.575   | 0.268     | 3e-06            | NA                    | Hypermethylated in FP vs FN |
| cg09232555 | 0.830   | 0.417   | 0.413     | 3e-06            | NA                    | Hypermethylated in FP vs FN |
| cg11274172 | 0.660   | 0.337   | 0.324     | 3e-06            | NA                    | Hypermethylated in FP vs FN |
| cg02625138 | 0.664   | 0.400   | 0.264     | 3e-06            | NA                    | Hypermethylated in FP vs FN |
| cg06357561 | 0.457   | 0.191   | 0.267     | 3e-06            | STAT5A                | Hypermethylated in FP vs FN |
| cg17494438 | 0.600   | 0.341   | 0.259     | 3e-06            | DRGX                  | Hypermethylated in FP vs FN |
| cg20754348 | 0.617   | 0.326   | 0.291     | 3e-06            | NR2F2                 | Hypermethylated in FP vs FN |
| cg16383291 | 0.809   | 0.507   | 0.301     | 3e-06            | NA                    | Hypermethylated in FP vs FN |
| cg11199137 | 0.465   | 0.124   | 0.341     | 3e-06            | ENC1                  | Hypermethylated in FP vs FN |
| cg03254465 | 0.575   | 0.203   | 0.373     | 3e-06            | NA                    | Hypermethylated in FP vs FN |
| cg15853812 | 0.787   | 0.518   | 0.268     | 3e-06            | TMEM88                | Hypermethylated in FP vs FN |
| cg27523780 | 0.853   | 0.518   | 0.335     | 3e-06            | NA                    | Hypermethylated in FP vs FN |
| cg03228449 | 0.768   | 0.430   | 0.339     | 3e-06            | NA                    | Hypermethylated in FP vs FN |
| cg26807961 | 0.421   | 0.167   | 0.254     | 3e-06            | NA                    | Hypermethylated in FP vs FN |
| cg03809847 | 0.627   | 0.365   | 0.262     | 3e-06            | NA                    | Hypermethylated in FP vs FN |
| cg27241808 | 0.525   | 0.100   | 0.425     | 3e-06            | NA                    | Hypermethylated in FP vs FN |
| cg13670057 | 0.561   | 0.235   | 0.326     | 3e-06            | NA                    | Hypermethylated in FP vs FN |

### Supplementary Table 7 (continued)

| Probe      | FP.mean | FN.mean | Mean.diff | Adjusted.P.value | Promoter.related.gene | Category                    |
|------------|---------|---------|-----------|------------------|-----------------------|-----------------------------|
| cg07139350 | 0.842   | 0.545   | 0.297     | 3e-06            | NA                    | Hypermethylated in FP vs FN |
| cg13411784 | 0.530   | 0.224   | 0.306     | 3e-06            | WDR85                 | Hypermethylated in FP vs FN |
| cg23271831 | 0.543   | 0.203   | 0.340     | 3e-06            | COL1A2                | Hypermethylated in FP vs FN |
| cg26164879 | 0.701   | 0.336   | 0.365     | 3e-06            | NA                    | Hypermethylated in FP vs FN |
| cg12719844 | 0.635   | 0.366   | 0.269     | 3e-06            | NA                    | Hypermethylated in FP vs FN |
| cg17260706 | 0.544   | 0.277   | 0.266     | 3e-06            | BCL9L                 | Hypermethylated in FP vs FN |
| cg01987224 | 0.747   | 0.452   | 0.295     | 3e-06            | NA                    | Hypermethylated in FP vs FN |
| cg19794507 | 0.524   | 0.202   | 0.322     | 3e-06            | NA                    | Hypermethylated in FP vs FN |
| cg14566901 | 0.771   | 0.459   | 0.313     | 3e-06            | NA                    | Hypermethylated in FP vs FN |
| cg12945444 | 0.815   | 0.402   | 0.413     | 3e-06            | NA                    | Hypermethylated in FP vs FN |
| cg20125920 | 0.812   | 0.517   | 0.294     | 3e-06            | NA                    | Hypermethylated in FP vs FN |
| cg09296742 | 0.732   | 0.465   | 0.267     | 3e-06            | NA                    | Hypermethylated in FP vs FN |
| cg03214217 | 0.737   | 0.398   | 0.339     | 3e-06            | NA                    | Hypermethylated in FP vs FN |
| cg07095347 | 0.583   | 0.326   | 0.258     | 3e-06            | NA                    | Hypermethylated in FP vs FN |
| cg20763234 | 0.602   | 0.347   | 0.255     | 3e-06            | NA                    | Hypermethylated in FP vs FN |
| cg13969674 | 0.600   | 0.283   | 0.317     | 3e-06            | NA                    | Hypermethylated in FP vs FN |
| cg07638689 | 0.565   | 0.280   | 0.284     | 3e-06            | NA                    | Hypermethylated in FP vs FN |
| cg18995558 | 0.766   | 0.451   | 0.316     | 3e-06            | NA                    | Hypermethylated in FP vs FN |
| cg23097155 | 0.498   | 0.131   | 0.367     | 3e-06            | FBRSL1                | Hypermethylated in FP vs FN |
| cg05831188 | 0.590   | 0.327   | 0.263     | 3e-06            | NA                    | Hypermethylated in FP vs FN |
| cg20122518 | 0.577   | 0.290   | 0.287     | 3e-06            | NA                    | Hypermethylated in FP vs FN |
| cg08887138 | 0.818   | 0.480   | 0.338     | 3e-06            | NA                    | Hypermethylated in FP vs FN |
| cg23978557 | 0.782   | 0.481   | 0.301     | 3e-06            | SMPD2                 | Hypermethylated in FP vs FN |
| cg15022739 | 0.734   | 0.438   | 0.296     | 3e-06            | NA                    | Hypermethylated in FP vs FN |
| cg08857479 | 0.545   | 0.235   | 0.310     | 3e-06            | NA                    | Hypermethylated in FP vs FN |

### Supplementary Table 7 (continued)

| Probe      | FP.mean | FN.mean | Mean.diff | Adjusted.P.value | Promoter.related.gene | Category                    |
|------------|---------|---------|-----------|------------------|-----------------------|-----------------------------|
| cg00417807 | 0.837   | 0.508   | 0.328     | 3e-06            | NA                    | Hypermethylated in FP vs FN |
| cg12507655 | 0.480   | 0.150   | 0.330     | 3e-06            | TRIP6                 | Hypermethylated in FP vs FN |
| cg26860182 | 0.546   | 0.153   | 0.393     | 3e-06            | FBRSL1                | Hypermethylated in FP vs FN |
| cg25369980 | 0.451   | 0.082   | 0.369     | 4e-06            | ENC1                  | Hypermethylated in FP vs FN |
| cg23478293 | 0.727   | 0.375   | 0.352     | 4e-06            | OTX2OS1               | Hypermethylated in FP vs FN |
| cg06892898 | 0.458   | 0.208   | 0.250     | 4e-06            | ELMO1                 | Hypermethylated in FP vs FN |
| cg23661183 | 0.529   | 0.173   | 0.356     | 4e-06            | ABLIM1                | Hypermethylated in FP vs FN |
| cg02344497 | 0.774   | 0.476   | 0.298     | 4e-06            | NA                    | Hypermethylated in FP vs FN |
| cg13923669 | 0.575   | 0.221   | 0.353     | 4e-06            | NA                    | Hypermethylated in FP vs FN |
| cg00658440 | 0.694   | 0.404   | 0.290     | 4e-06            | NA                    | Hypermethylated in FP vs FN |
| cg07536627 | 0.753   | 0.489   | 0.264     | 4e-06            | NA                    | Hypermethylated in FP vs FN |
| cg27196467 | 0.501   | 0.200   | 0.301     | 4e-06            | KCNIP4                | Hypermethylated in FP vs FN |
| cg03969996 | 0.539   | 0.235   | 0.304     | 4e-06            | PNMAL2                | Hypermethylated in FP vs FN |
| cg25552768 | 0.638   | 0.314   | 0.323     | 4e-06            | LEFTY1                | Hypermethylated in FP vs FN |
| cg01696226 | 0.593   | 0.142   | 0.451     | 4e-06            | NA                    | Hypermethylated in FP vs FN |
| cg02805890 | 0.449   | 0.182   | 0.267     | 4e-06            | NA                    | Hypermethylated in FP vs FN |
| cg11453712 | 0.635   | 0.207   | 0.427     | 4e-06            | PHPT1                 | Hypermethylated in FP vs FN |
| cg25801292 | 0.486   | 0.192   | 0.294     | 4e-06            | KEAP1                 | Hypermethylated in FP vs FN |
| cg03179291 | 0.726   | 0.283   | 0.443     | 4e-06            | NA                    | Hypermethylated in FP vs FN |
| cg05898591 | 0.504   | 0.167   | 0.337     | 4e-06            | NA                    | Hypermethylated in FP vs FN |
| cg25020459 | 0.384   | 0.099   | 0.285     | 4e-06            | NA                    | Hypermethylated in FP vs FN |
| cg23395341 | 0.790   | 0.438   | 0.352     | 4e-06            | NA                    | Hypermethylated in FP vs FN |
| cg21930938 | 0.804   | 0.487   | 0.317     | 4e-06            | NA                    | Hypermethylated in FP vs FN |
| cg03678039 | 0.598   | 0.294   | 0.305     | 4e-06            | NA                    | Hypermethylated in FP vs FN |
| cg18741166 | 0.754   | 0.502   | 0.252     | 4e-06            | NA                    | Hypermethylated in FP vs FN |

### Supplementary Table 7 (continued)

| Probe      | FP.mean | FN.mean | Mean.diff | Adjusted.P.value | Promoter.related.gene | Category                    |
|------------|---------|---------|-----------|------------------|-----------------------|-----------------------------|
| cg23449696 | 0.756   | 0.353   | 0.403     | 4e-06            | ZIC1                  | Hypermethylated in FP vs FN |
| cg19944656 | 0.506   | 0.160   | 0.346     | 4e-06            | NA                    | Hypermethylated in FP vs FN |
| cg02750262 | 0.612   | 0.226   | 0.385     | 4e-06            | NA                    | Hypermethylated in FP vs FN |
| cg09659697 | 0.533   | 0.183   | 0.349     | 4e-06            | CCNO                  | Hypermethylated in FP vs FN |
| cg15206981 | 0.637   | 0.370   | 0.268     | 4e-06            | NA                    | Hypermethylated in FP vs FN |
| cg16785381 | 0.811   | 0.433   | 0.378     | 4e-06            | NA                    | Hypermethylated in FP vs FN |
| cg24036292 | 0.865   | 0.579   | 0.286     | 4e-06            | NA                    | Hypermethylated in FP vs FN |
| cg07206712 | 0.555   | 0.166   | 0.390     | 4e-06            | NA                    | Hypermethylated in FP vs FN |
| cg10024583 | 0.780   | 0.410   | 0.370     | 4e-06            | TBKBP1                | Hypermethylated in FP vs FN |
| cg04092581 | 0.740   | 0.455   | 0.285     | 4e-06            | NA                    | Hypermethylated in FP vs FN |
| cg21763873 | 0.815   | 0.561   | 0.254     | 4e-06            | NA                    | Hypermethylated in FP vs FN |
| cg03960279 | 0.780   | 0.489   | 0.292     | 4e-06            | NA                    | Hypermethylated in FP vs FN |
| cg16662768 | 0.412   | 0.150   | 0.262     | 4e-06            | NA                    | Hypermethylated in FP vs FN |
| cg03065447 | 0.423   | 0.122   | 0.302     | 4e-06            | NA                    | Hypermethylated in FP vs FN |
| cg06836406 | 0.728   | 0.378   | 0.350     | 4e-06            | NA                    | Hypermethylated in FP vs FN |
| cg16793525 | 0.797   | 0.524   | 0.273     | 4e-06            | NA                    | Hypermethylated in FP vs FN |
| cg06174599 | 0.593   | 0.243   | 0.350     | 4e-06            | NA                    | Hypermethylated in FP vs FN |
| cg01643123 | 0.396   | 0.116   | 0.280     | 4e-06            | NA                    | Hypermethylated in FP vs FN |
| cg27234090 | 0.460   | 0.199   | 0.261     | 4e-06            | NA                    | Hypermethylated in FP vs FN |
| cg10670787 | 0.853   | 0.563   | 0.289     | 4e-06            | NA                    | Hypermethylated in FP vs FN |
| cg09901035 | 0.719   | 0.386   | 0.333     | 4e-06            | NA                    | Hypermethylated in FP vs FN |
| cg00758701 | 0.742   | 0.411   | 0.331     | 4e-06            | NA                    | Hypermethylated in FP vs FN |
| cg25939380 | 0.803   | 0.442   | 0.361     | 4e-06            | NA                    | Hypermethylated in FP vs FN |
| cg24602369 | 0.684   | 0.398   | 0.286     | 4e-06            | NA                    | Hypermethylated in FP vs FN |
| cg07671011 | 0.716   | 0.370   | 0.346     | 4e-06            | NA                    | Hypermethylated in FP vs FN |

### Supplementary Table 7 (continued)

| Probe      | FP.mean | FN.mean | Mean.diff | Adjusted.P.value | Promoter.related.gene | Category                    |
|------------|---------|---------|-----------|------------------|-----------------------|-----------------------------|
| cg03566682 | 0.881   | 0.618   | 0.262     | 4e-06            | NA                    | Hypermethylated in FP vs FN |
| cg03421353 | 0.770   | 0.512   | 0.258     | 4e-06            | NA                    | Hypermethylated in FP vs FN |
| cg10107248 | 0.813   | 0.546   | 0.268     | 4e-06            | NA                    | Hypermethylated in FP vs FN |
| cg00866870 | 0.615   | 0.316   | 0.299     | 4e-06            | NA                    | Hypermethylated in FP vs FN |
| cg11697111 | 0.588   | 0.262   | 0.327     | 4e-06            | GPER                  | Hypermethylated in FP vs FN |
| cg11117438 | 0.584   | 0.269   | 0.316     | 4e-06            | NA                    | Hypermethylated in FP vs FN |
| cg17119279 | 0.667   | 0.338   | 0.329     | 4e-06            | NA                    | Hypermethylated in FP vs FN |
| cg01120434 | 0.804   | 0.547   | 0.257     | 4e-06            | NA                    | Hypermethylated in FP vs FN |
| cg16713743 | 0.690   | 0.315   | 0.376     | 4e-06            | OLIG2                 | Hypermethylated in FP vs FN |
| cg16335919 | 0.705   | 0.414   | 0.290     | 4e-06            | NA                    | Hypermethylated in FP vs FN |
| cg02560388 | 0.704   | 0.367   | 0.338     | 4e-06            | NA                    | Hypermethylated in FP vs FN |
| cg21466107 | 0.613   | 0.339   | 0.275     | 4e-06            | NA                    | Hypermethylated in FP vs FN |
| cg25818763 | 0.735   | 0.373   | 0.362     | 4e-06            | NA                    | Hypermethylated in FP vs FN |
| cg07563611 | 0.593   | 0.313   | 0.280     | 4e-06            | NA                    | Hypermethylated in FP vs FN |
| cg10513852 | 0.592   | 0.310   | 0.281     | 4e-06            | MYF5                  | Hypermethylated in FP vs FN |
| cg02004337 | 0.633   | 0.302   | 0.331     | 4e-06            | NA                    | Hypermethylated in FP vs FN |
| cg26558591 | 0.770   | 0.440   | 0.331     | 4e-06            | NA                    | Hypermethylated in FP vs FN |
| cg13713537 | 0.879   | 0.575   | 0.304     | 4e-06            | NA                    | Hypermethylated in FP vs FN |
| cg13071386 | 0.402   | 0.139   | 0.263     | 4e-06            | NA                    | Hypermethylated in FP vs FN |
| cg18442019 | 0.740   | 0.435   | 0.304     | 4e-06            | NA                    | Hypermethylated in FP vs FN |
| cg18580322 | 0.756   | 0.473   | 0.283     | 4e-06            | G2E3                  | Hypermethylated in FP vs FN |
| cg04129469 | 0.722   | 0.367   | 0.355     | 4e-06            | PAX7                  | Hypermethylated in FP vs FN |
| cg13407169 | 0.743   | 0.421   | 0.322     | 4e-06            | LBX2                  | Hypermethylated in FP vs FN |
| cg14409023 | 0.531   | 0.145   | 0.386     | 4e-06            | NA                    | Hypermethylated in FP vs FN |
| cg02071553 | 0.668   | 0.417   | 0.250     | 4e-06            | MIR216B               | Hypermethylated in FP vs FN |

### Supplementary Table 7 (continued)

| Probe      | FP.mean | FN.mean | Mean.diff | Adjusted.P.value | Promoter.related.gene | Category                    |
|------------|---------|---------|-----------|------------------|-----------------------|-----------------------------|
| cg15291243 | 0.731   | 0.344   | 0.387     | 4e-06            | NA                    | Hypermethylated in FP vs FN |
| cg03106207 | 0.696   | 0.436   | 0.260     | 4e-06            | NA                    | Hypermethylated in FP vs FN |
| cg01400685 | 0.707   | 0.413   | 0.294     | 4e-06            | NA                    | Hypermethylated in FP vs FN |
| cg08461760 | 0.568   | 0.279   | 0.289     | 4e-06            | NA                    | Hypermethylated in FP vs FN |
| cg04007302 | 0.603   | 0.305   | 0.298     | 4e-06            | NA                    | Hypermethylated in FP vs FN |
| cg27237671 | 0.509   | 0.255   | 0.253     | 4e-06            | NA                    | Hypermethylated in FP vs FN |
| cg06494775 | 0.730   | 0.471   | 0.259     | 4e-06            | NA                    | Hypermethylated in FP vs FN |
| cg05583848 | 0.513   | 0.225   | 0.288     | 4e-06            | DEF6                  | Hypermethylated in FP vs FN |
| cg12382846 | 0.727   | 0.451   | 0.276     | 4e-06            | NA                    | Hypermethylated in FP vs FN |
| cg09423312 | 0.749   | 0.413   | 0.336     | 4e-06            | NA                    | Hypermethylated in FP vs FN |
| cg17631451 | 0.617   | 0.274   | 0.342     | 4e-06            | TREX1                 | Hypermethylated in FP vs FN |
| cg23336695 | 0.708   | 0.380   | 0.328     | 4e-06            | NA                    | Hypermethylated in FP vs FN |
| cg14258877 | 0.776   | 0.494   | 0.281     | 4e-06            | NA                    | Hypermethylated in FP vs FN |
| cg24984506 | 0.828   | 0.516   | 0.313     | 4e-06            | NA                    | Hypermethylated in FP vs FN |
| cg08251025 | 0.667   | 0.358   | 0.310     | 5e-06            | NA                    | Hypermethylated in FP vs FN |
| cg21999726 | 0.803   | 0.526   | 0.277     | 5e-06            | NA                    | Hypermethylated in FP vs FN |
| cg18247090 | 0.800   | 0.505   | 0.295     | 5e-06            | NA                    | Hypermethylated in FP vs FN |
| cg01449818 | 0.401   | 0.149   | 0.253     | 5e-06            | ABLIM1                | Hypermethylated in FP vs FN |
| cg16604516 | 0.577   | 0.274   | 0.303     | 5e-06            | FBLN2                 | Hypermethylated in FP vs FN |
| cg19313660 | 0.752   | 0.461   | 0.292     | 5e-06            | NA                    | Hypermethylated in FP vs FN |
| cg00247334 | 0.812   | 0.542   | 0.270     | 5e-06            | OXTR                  | Hypermethylated in FP vs FN |
| cg05341384 | 0.546   | 0.223   | 0.323     | 5e-06            | NA                    | Hypermethylated in FP vs FN |
| cg15909319 | 0.343   | 0.079   | 0.264     | 5e-06            | NA                    | Hypermethylated in FP vs FN |
| cg01732465 | 0.507   | 0.223   | 0.283     | 5e-06            | NA                    | Hypermethylated in FP vs FN |
| cg10005273 | 0.598   | 0.347   | 0.251     | 5e-06            | NA                    | Hypermethylated in FP vs FN |

### Supplementary Table 7 (continued)

| Probe      | FP.mean | FN.mean | Mean.diff | Adjusted.P.value | Promoter.related.gene | Category                    |
|------------|---------|---------|-----------|------------------|-----------------------|-----------------------------|
| cg17061156 | 0.650   | 0.314   | 0.337     | 5e-06            | NA                    | Hypermethylated in FP vs FN |
| cg02509000 | 0.813   | 0.522   | 0.291     | 5e-06            | NA                    | Hypermethylated in FP vs FN |
| cg11479000 | 0.746   | 0.489   | 0.257     | 5e-06            | NA                    | Hypermethylated in FP vs FN |
| cg15735954 | 0.898   | 0.602   | 0.296     | 5e-06            | NA                    | Hypermethylated in FP vs FN |
| cg21380380 | 0.679   | 0.359   | 0.320     | 5e-06            | NA                    | Hypermethylated in FP vs FN |
| cg01759909 | 0.854   | 0.577   | 0.277     | 5e-06            | NA                    | Hypermethylated in FP vs FN |
| cg01480180 | 0.841   | 0.533   | 0.308     | 5e-06            | FZD1                  | Hypermethylated in FP vs FN |
| cg05833946 | 0.544   | 0.283   | 0.260     | 5e-06            | NA                    | Hypermethylated in FP vs FN |
| cg14036069 | 0.682   | 0.391   | 0.291     | 5e-06            | NA                    | Hypermethylated in FP vs FN |
| cg02695969 | 0.519   | 0.259   | 0.259     | 5e-06            | NA                    | Hypermethylated in FP vs FN |
| cg04914574 | 0.671   | 0.384   | 0.287     | 5e-06            | NA                    | Hypermethylated in FP vs FN |
| cg08452338 | 0.589   | 0.333   | 0.256     | 5e-06            | NA                    | Hypermethylated in FP vs FN |
| cg18571590 | 0.690   | 0.298   | 0.392     | 5e-06            | NA                    | Hypermethylated in FP vs FN |
| cg08436419 | 0.589   | 0.290   | 0.299     | 5e-06            | DGKD                  | Hypermethylated in FP vs FN |
| cg00748492 | 0.756   | 0.506   | 0.250     | 5e-06            | NA                    | Hypermethylated in FP vs FN |
| cg06492372 | 0.560   | 0.258   | 0.302     | 5e-06            | NA                    | Hypermethylated in FP vs FN |
| cg11947548 | 0.677   | 0.418   | 0.258     | 5e-06            | NA                    | Hypermethylated in FP vs FN |
| cg01758799 | 0.846   | 0.510   | 0.335     | 5e-06            | NA                    | Hypermethylated in FP vs FN |
| cg06653203 | 0.628   | 0.294   | 0.334     | 5e-06            | NA                    | Hypermethylated in FP vs FN |
| cg21515406 | 0.759   | 0.502   | 0.256     | 5e-06            | NA                    | Hypermethylated in FP vs FN |
| cg06574769 | 0.714   | 0.416   | 0.298     | 5e-06            | NA                    | Hypermethylated in FP vs FN |
| cg08906309 | 0.674   | 0.334   | 0.340     | 5e-06            | NA                    | Hypermethylated in FP vs FN |
| cg00080125 | 0.701   | 0.442   | 0.258     | 5e-06            | C17orf82              | Hypermethylated in FP vs FN |
| cg02920604 | 0.710   | 0.421   | 0.289     | 5e-06            | NA                    | Hypermethylated in FP vs FN |
| cg11303301 | 0.609   | 0.352   | 0.257     | 5e-06            | NA                    | Hypermethylated in FP vs FN |

### Supplementary Table 7 (continued)

| Probe      | FP.mean | FN.mean | Mean.diff | Adjusted.P.value | Promoter.related.gene | Category                    |
|------------|---------|---------|-----------|------------------|-----------------------|-----------------------------|
| cg23371754 | 0.839   | 0.586   | 0.253     | 5e-06            | NA                    | Hypermethylated in FP vs FN |
| cg11445155 | 0.643   | 0.314   | 0.329     | 5e-06            | NA                    | Hypermethylated in FP vs FN |
| cg19080053 | 0.661   | 0.405   | 0.257     | 5e-06            | NA                    | Hypermethylated in FP vs FN |
| cg03595018 | 0.863   | 0.546   | 0.317     | 5e-06            | NA                    | Hypermethylated in FP vs FN |
| cg04106395 | 0.896   | 0.584   | 0.312     | 5e-06            | NA                    | Hypermethylated in FP vs FN |
| cg17884766 | 0.772   | 0.521   | 0.251     | 5e-06            | NA                    | Hypermethylated in FP vs FN |
| cg26668490 | 0.697   | 0.313   | 0.384     | 5e-06            | NA                    | Hypermethylated in FP vs FN |
| cg01418153 | 0.601   | 0.274   | 0.327     | 5e-06            | NA                    | Hypermethylated in FP vs FN |
| cg09813986 | 0.876   | 0.610   | 0.266     | 5e-06            | ZFR                   | Hypermethylated in FP vs FN |
| cg22507023 | 0.488   | 0.178   | 0.311     | 5e-06            | NA                    | Hypermethylated in FP vs FN |
| cg02938414 | 0.569   | 0.261   | 0.308     | 5e-06            | NA                    | Hypermethylated in FP vs FN |
| cg26781303 | 0.667   | 0.413   | 0.254     | 5e-06            | NA                    | Hypermethylated in FP vs FN |
| cg03989758 | 0.800   | 0.497   | 0.303     | 5e-06            | NA                    | Hypermethylated in FP vs FN |
| cg24851600 | 0.629   | 0.297   | 0.331     | 5e-06            | NA                    | Hypermethylated in FP vs FN |
| cg01893695 | 0.602   | 0.283   | 0.318     | 5e-06            | NA                    | Hypermethylated in FP vs FN |
| cg07585069 | 0.765   | 0.457   | 0.308     | 5e-06            | PROCA1                | Hypermethylated in FP vs FN |
| cg00958560 | 0.739   | 0.471   | 0.267     | 5e-06            | NA                    | Hypermethylated in FP vs FN |
| cg16385029 | 0.712   | 0.453   | 0.259     | 5e-06            | NA                    | Hypermethylated in FP vs FN |
| cg13572309 | 0.529   | 0.143   | 0.386     | 5e-06            | NA                    | Hypermethylated in FP vs FN |
| cg17648080 | 0.782   | 0.446   | 0.336     | 5e-06            | NA                    | Hypermethylated in FP vs FN |
| cg08519134 | 0.729   | 0.413   | 0.315     | 5e-06            | NA                    | Hypermethylated in FP vs FN |
| cg27617086 | 0.636   | 0.349   | 0.286     | 5e-06            | NA                    | Hypermethylated in FP vs FN |
| cg10075976 | 0.566   | 0.308   | 0.258     | 5e-06            | NA                    | Hypermethylated in FP vs FN |
| cg05068533 | 0.423   | 0.155   | 0.268     | 5e-06            | CCND1                 | Hypermethylated in FP vs FN |
| cg11324650 | 0.742   | 0.410   | 0.333     | 6e-06            | NA                    | Hypermethylated in FP vs FN |



### Supplementary Table 7 (continued)

| Probe      | FP.mean | FN.mean | Mean.diff | Adjusted.P.value | Promoter.related.gene | Category                    |
|------------|---------|---------|-----------|------------------|-----------------------|-----------------------------|
| cg08940570 | 0.793   | 0.502   | 0.292     | 6e-06            | DOK1                  | Hypermethylated in FP vs FN |
| cg26071135 | 0.624   | 0.282   | 0.341     | 6e-06            | TSPAN4_POLR2L         | Hypermethylated in FP vs FN |
| cg17519156 | 0.661   | 0.376   | 0.284     | 6e-06            | NA                    | Hypermethylated in FP vs FN |
| cg26670674 | 0.697   | 0.399   | 0.299     | 6e-06            | NA                    | Hypermethylated in FP vs FN |
| cg23206032 | 0.763   | 0.426   | 0.337     | 6e-06            | NA                    | Hypermethylated in FP vs FN |
| cg24503003 | 0.626   | 0.359   | 0.268     | 6e-06            | NA                    | Hypermethylated in FP vs FN |
| cg07175507 | 0.321   | 0.053   | 0.268     | 6e-06            | NA                    | Hypermethylated in FP vs FN |
| cg07118299 | 0.745   | 0.458   | 0.286     | 6e-06            | LOC732275             | Hypermethylated in FP vs FN |
| cg26558992 | 0.790   | 0.509   | 0.281     | 6e-06            | NA                    | Hypermethylated in FP vs FN |
| cg08087655 | 0.817   | 0.468   | 0.348     | 6e-06            | NA                    | Hypermethylated in FP vs FN |
| cg00134602 | 0.791   | 0.463   | 0.328     | 6e-06            | NA                    | Hypermethylated in FP vs FN |
| cg03449660 | 0.583   | 0.228   | 0.355     | 6e-06            | NA                    | Hypermethylated in FP vs FN |
| cg20972167 | 0.867   | 0.601   | 0.267     | 6e-06            | NA                    | Hypermethylated in FP vs FN |
| cg12804791 | 0.702   | 0.286   | 0.416     | 6e-06            | NA                    | Hypermethylated in FP vs FN |
| cg04062717 | 0.609   | 0.357   | 0.252     | 6e-06            | NA                    | Hypermethylated in FP vs FN |
| cg00388391 | 0.510   | 0.252   | 0.259     | 6e-06            | NA                    | Hypermethylated in FP vs FN |
| cg02589501 | 0.679   | 0.341   | 0.338     | 6e-06            | USP46                 | Hypermethylated in FP vs FN |
| cg23196346 | 0.703   | 0.433   | 0.270     | 6e-06            | NA                    | Hypermethylated in FP vs FN |
| cg17683336 | 0.546   | 0.252   | 0.294     | 6e-06            | KANK2                 | Hypermethylated in FP vs FN |
| cg14969261 | 0.859   | 0.572   | 0.287     | 6e-06            | NA                    | Hypermethylated in FP vs FN |
| cg20272648 | 0.657   | 0.359   | 0.297     | 6e-06            | NA                    | Hypermethylated in FP vs FN |
| cg27643022 | 0.694   | 0.418   | 0.276     | 6e-06            | CCDC89                | Hypermethylated in FP vs FN |
| cg17339910 | 0.638   | 0.250   | 0.388     | 6e-06            | NA                    | Hypermethylated in FP vs FN |
| cg03180404 | 0.897   | 0.640   | 0.257     | 6e-06            | NA                    | Hypermethylated in FP vs FN |
| cg07693262 | 0.657   | 0.399   | 0.258     | 6e-06            | NA                    | Hypermethylated in FP vs FN |

### Supplementary Table 7 (continued)

| Probe      | FP.mean | FN.mean | Mean.diff | Adjusted.P.value | Promoter.related.gene | Category                    |
|------------|---------|---------|-----------|------------------|-----------------------|-----------------------------|
| cg20222562 | 0.781   | 0.469   | 0.312     | 6e-06            | NA                    | Hypermethylated in FP vs FN |
| cg25325257 | 0.699   | 0.407   | 0.292     | 6e-06            | NA                    | Hypermethylated in FP vs FN |
| cg14530275 | 0.665   | 0.348   | 0.317     | 6e-06            | NA                    | Hypermethylated in FP vs FN |
| cg10102242 | 0.563   | 0.185   | 0.378     | 6e-06            | NA                    | Hypermethylated in FP vs FN |
| cg13077562 | 0.800   | 0.504   | 0.295     | 6e-06            | PNOC                  | Hypermethylated in FP vs FN |
| cg10819050 | 0.723   | 0.470   | 0.253     | 6e-06            | NA                    | Hypermethylated in FP vs FN |
| cg04587084 | 0.747   | 0.415   | 0.331     | 6e-06            | NA                    | Hypermethylated in FP vs FN |
| cg25422351 | 0.358   | 0.100   | 0.259     | 6e-06            | USP2                  | Hypermethylated in FP vs FN |
| cg01377200 | 0.891   | 0.634   | 0.257     | 6e-06            | NA                    | Hypermethylated in FP vs FN |
| cg14129855 | 0.699   | 0.378   | 0.321     | 6e-06            | NA                    | Hypermethylated in FP vs FN |
| cg14474150 | 0.723   | 0.381   | 0.343     | 6e-06            | NA                    | Hypermethylated in FP vs FN |
| cg21493516 | 0.790   | 0.402   | 0.389     | 6e-06            | NA                    | Hypermethylated in FP vs FN |
| cg25922969 | 0.609   | 0.325   | 0.284     | 6e-06            | NA                    | Hypermethylated in FP vs FN |
| cg06826341 | 0.770   | 0.511   | 0.259     | 6e-06            | NA                    | Hypermethylated in FP vs FN |
| cg18056973 | 0.381   | 0.088   | 0.292     | 6e-06            | RBMS3                 | Hypermethylated in FP vs FN |
| cg21822187 | 0.397   | 0.140   | 0.256     | 6e-06            | NA                    | Hypermethylated in FP vs FN |
| cg08751438 | 0.777   | 0.514   | 0.264     | 6e-06            | NA                    | Hypermethylated in FP vs FN |
| cg19502920 | 0.723   | 0.326   | 0.397     | 6e-06            | NA                    | Hypermethylated in FP vs FN |
| cg04414849 | 0.846   | 0.587   | 0.259     | 6e-06            | NA                    | Hypermethylated in FP vs FN |
| cg12645616 | 0.585   | 0.333   | 0.252     | 6e-06            | NA                    | Hypermethylated in FP vs FN |
| cg14772884 | 0.643   | 0.326   | 0.318     | 6e-06            | NA                    | Hypermethylated in FP vs FN |
| cg03049691 | 0.747   | 0.356   | 0.391     | 6e-06            | PROCA1                | Hypermethylated in FP vs FN |
| cg21805138 | 0.792   | 0.509   | 0.282     | 6e-06            | NA                    | Hypermethylated in FP vs FN |
| cg10752421 | 0.918   | 0.568   | 0.349     | 6e-06            | NA                    | Hypermethylated in FP vs FN |
| cg07980777 | 0.764   | 0.427   | 0.337     | 6e-06            | NA                    | Hypermethylated in FP vs FN |

### Supplementary Table 7 (continued)

| Probe      | FP.mean | FN.mean | Mean.diff | Adjusted.P.value | Promoter.related.gene | Category                    |
|------------|---------|---------|-----------|------------------|-----------------------|-----------------------------|
| cg04658679 | 0.740   | 0.467   | 0.273     | 6e-06            | NA                    | Hypermethylated in FP vs FN |
| cg18703951 | 0.830   | 0.563   | 0.267     | 6e-06            | CNR1                  | Hypermethylated in FP vs FN |
| cg02610600 | 0.587   | 0.246   | 0.341     | 6e-06            | NA                    | Hypermethylated in FP vs FN |
| cg03276468 | 0.840   | 0.548   | 0.292     | 6e-06            | NA                    | Hypermethylated in FP vs FN |
| cg19122260 | 0.849   | 0.533   | 0.316     | 6e-06            | NA                    | Hypermethylated in FP vs FN |
| cg13582775 | 0.637   | 0.345   | 0.293     | 6e-06            | NA                    | Hypermethylated in FP vs FN |
| cg23638252 | 0.613   | 0.314   | 0.298     | 6e-06            | NA                    | Hypermethylated in FP vs FN |
| cg24003866 | 0.843   | 0.585   | 0.259     | 6e-06            | NA                    | Hypermethylated in FP vs FN |
| cg11217865 | 0.607   | 0.324   | 0.284     | 6e-06            | NA                    | Hypermethylated in FP vs FN |
| cg22158992 | 0.632   | 0.331   | 0.301     | 6e-06            | NA                    | Hypermethylated in FP vs FN |
| cg22802812 | 0.688   | 0.392   | 0.296     | 6e-06            | DLG2                  | Hypermethylated in FP vs FN |
| cg09638944 | 0.541   | 0.264   | 0.277     | 6e-06            | NA                    | Hypermethylated in FP vs FN |
| cg24136700 | 0.619   | 0.310   | 0.309     | 6e-06            | NA                    | Hypermethylated in FP vs FN |
| cg04021526 | 0.572   | 0.301   | 0.271     | 6e-06            | NA                    | Hypermethylated in FP vs FN |
| cg07522913 | 0.798   | 0.484   | 0.315     | 6e-06            | NA                    | Hypermethylated in FP vs FN |
| cg14073571 | 0.858   | 0.579   | 0.278     | 7e-06            | NA                    | Hypermethylated in FP vs FN |
| cg14003931 | 0.726   | 0.464   | 0.261     | 7e-06            | NA                    | Hypermethylated in FP vs FN |
| cg25595641 | 0.897   | 0.605   | 0.292     | 7e-06            | NA                    | Hypermethylated in FP vs FN |
| cg11857626 | 0.835   | 0.565   | 0.270     | 7e-06            | IQCF5                 | Hypermethylated in FP vs FN |
| cg12170191 | 0.607   | 0.352   | 0.255     | 7e-06            | NA                    | Hypermethylated in FP vs FN |
| cg08218971 | 0.584   | 0.286   | 0.297     | 7e-06            | C16orf53              | Hypermethylated in FP vs FN |
| cg26639085 | 0.868   | 0.569   | 0.299     | 7e-06            | NA                    | Hypermethylated in FP vs FN |
| cg01194765 | 0.744   | 0.436   | 0.308     | 7e-06            | NA                    | Hypermethylated in FP vs FN |
| cg02311540 | 0.430   | 0.174   | 0.255     | 7e-06            | NA                    | Hypermethylated in FP vs FN |
| cg01706334 | 0.630   | 0.271   | 0.359     | 7e-06            | NA                    | Hypermethylated in FP vs FN |

### Supplementary Table 7 (continued)

| Probe      | FP.mean | FN.mean | Mean.diff | Adjusted.P.value | Promoter.related.gene | Category                    |
|------------|---------|---------|-----------|------------------|-----------------------|-----------------------------|
| cg24579589 | 0.835   | 0.564   | 0.271     | 7e-06            | NA                    | Hypermethylated in FP vs FN |
| cg04750099 | 0.723   | 0.450   | 0.273     | 7e-06            | OR9Q2                 | Hypermethylated in FP vs FN |
| cg10000318 | 0.633   | 0.228   | 0.405     | 7e-06            | NA                    | Hypermethylated in FP vs FN |
| cg10375890 | 0.398   | 0.118   | 0.280     | 7e-06            | NA                    | Hypermethylated in FP vs FN |
| cg13524919 | 0.824   | 0.497   | 0.327     | 7e-06            | NA                    | Hypermethylated in FP vs FN |
| cg13104938 | 0.709   | 0.396   | 0.314     | 7e-06            | TSPAN4_POLR2L         | Hypermethylated in FP vs FN |
| cg05408649 | 0.850   | 0.470   | 0.381     | 7e-06            | NA                    | Hypermethylated in FP vs FN |
| cg11673291 | 0.508   | 0.168   | 0.339     | 7e-06            | NA                    | Hypermethylated in FP vs FN |
| cg08922179 | 0.785   | 0.513   | 0.272     | 7e-06            | NA                    | Hypermethylated in FP vs FN |
| cg08428545 | 0.659   | 0.344   | 0.315     | 7e-06            | NA                    | Hypermethylated in FP vs FN |
| cg03533472 | 0.615   | 0.261   | 0.355     | 7e-06            | GPT2                  | Hypermethylated in FP vs FN |
| cg20050108 | 0.682   | 0.427   | 0.256     | 7e-06            | FOXP2                 | Hypermethylated in FP vs FN |
| cg02114903 | 0.620   | 0.329   | 0.291     | 7e-06            | NA                    | Hypermethylated in FP vs FN |
| cg12702354 | 0.750   | 0.438   | 0.312     | 7e-06            | NA                    | Hypermethylated in FP vs FN |
| cg12046758 | 0.607   | 0.191   | 0.416     | 7e-06            | NA                    | Hypermethylated in FP vs FN |
| cg21037008 | 0.624   | 0.353   | 0.271     | 7e-06            | PRRT1_PPT2            | Hypermethylated in FP vs FN |
| cg14826909 | 0.680   | 0.366   | 0.314     | 7e-06            | NA                    | Hypermethylated in FP vs FN |
| cg17039236 | 0.603   | 0.177   | 0.426     | 7e-06            | NA                    | Hypermethylated in FP vs FN |
| cg16789680 | 0.700   | 0.352   | 0.348     | 7e-06            | NA                    | Hypermethylated in FP vs FN |
| cg08729810 | 0.471   | 0.214   | 0.258     | 7e-06            | OLIG2                 | Hypermethylated in FP vs FN |
| cg17848496 | 0.788   | 0.446   | 0.342     | 7e-06            | IRS1                  | Hypermethylated in FP vs FN |
| cg25102449 | 0.585   | 0.305   | 0.280     | 7e-06            | NA                    | Hypermethylated in FP vs FN |
| cg10488012 | 0.863   | 0.583   | 0.280     | 7e-06            | NA                    | Hypermethylated in FP vs FN |
| cg06614257 | 0.847   | 0.526   | 0.321     | 7e-06            | NA                    | Hypermethylated in FP vs FN |
| cg23070380 | 0.787   | 0.424   | 0.363     | 7e-06            | NA                    | Hypermethylated in FP vs FN |

### Supplementary Table 7 (continued)

| Probe      | FP.mean | FN.mean | Mean.diff | Adjusted.P.value | Promoter.related.gene | Category                    |
|------------|---------|---------|-----------|------------------|-----------------------|-----------------------------|
| cg12193731 | 0.462   | 0.112   | 0.350     | 7e-06            | ACVRL1                | Hypermethylated in FP vs FN |
| cg02840179 | 0.801   | 0.471   | 0.331     | 7e-06            | NA                    | Hypermethylated in FP vs FN |
| cg02443847 | 0.863   | 0.607   | 0.256     | 7e-06            | NA                    | Hypermethylated in FP vs FN |
| cg02255090 | 0.866   | 0.575   | 0.291     | 7e-06            | NA                    | Hypermethylated in FP vs FN |
| cg18061904 | 0.649   | 0.219   | 0.430     | 7e-06            | ACVR1C                | Hypermethylated in FP vs FN |
| cg14977066 | 0.509   | 0.162   | 0.348     | 7e-06            | NA                    | Hypermethylated in FP vs FN |
| cg26672952 | 0.553   | 0.264   | 0.289     | 7e-06            | NA                    | Hypermethylated in FP vs FN |
| cg05673079 | 0.836   | 0.558   | 0.278     | 7e-06            | NA                    | Hypermethylated in FP vs FN |
| cg05223396 | 0.663   | 0.376   | 0.287     | 7e-06            | NA                    | Hypermethylated in FP vs FN |
| cg15752343 | 0.552   | 0.215   | 0.337     | 7e-06            | NA                    | Hypermethylated in FP vs FN |
| cg15465823 | 0.717   | 0.439   | 0.278     | 7e-06            | NA                    | Hypermethylated in FP vs FN |
| cg23206520 | 0.672   | 0.394   | 0.278     | 7e-06            | NA                    | Hypermethylated in FP vs FN |
| cg14501061 | 0.490   | 0.179   | 0.311     | 7e-06            | ALDOC                 | Hypermethylated in FP vs FN |
| cg10855395 | 0.641   | 0.245   | 0.396     | 7e-06            | NA                    | Hypermethylated in FP vs FN |
| cg02609692 | 0.698   | 0.356   | 0.342     | 7e-06            | NA                    | Hypermethylated in FP vs FN |
| cg26400885 | 0.796   | 0.405   | 0.391     | 7e-06            | ZIC1                  | Hypermethylated in FP vs FN |
| cg21027526 | 0.594   | 0.258   | 0.336     | 7e-06            | NA                    | Hypermethylated in FP vs FN |
| cg11613003 | 0.799   | 0.471   | 0.328     | 7e-06            | FZD7                  | Hypermethylated in FP vs FN |
| cg22046662 | 0.583   | 0.257   | 0.326     | 7e-06            | NA                    | Hypermethylated in FP vs FN |
| cg14020762 | 0.497   | 0.166   | 0.331     | 7e-06            | NA                    | Hypermethylated in FP vs FN |
| cg07844518 | 0.758   | 0.506   | 0.252     | 7e-06            | NA                    | Hypermethylated in FP vs FN |
| cg09732711 | 0.792   | 0.538   | 0.254     | 7e-06            | NA                    | Hypermethylated in FP vs FN |
| cg20210482 | 0.586   | 0.234   | 0.352     | 8e-06            | NA                    | Hypermethylated in FP vs FN |
| cg01539284 | 0.829   | 0.540   | 0.289     | 8e-06            | NA                    | Hypermethylated in FP vs FN |
| cg09109383 | 0.702   | 0.385   | 0.317     | 8e-06            | NA                    | Hypermethylated in FP vs FN |

### Supplementary Table 7 (continued)

| Probe      | FP.mean | FN.mean | Mean.diff | Adjusted.P.value | Promoter.related.gene | Category                    |
|------------|---------|---------|-----------|------------------|-----------------------|-----------------------------|
| cg04437845 | 0.825   | 0.542   | 0.283     | 8e-06            | NA                    | Hypermethylated in FP vs FN |
| cg10499651 | 0.805   | 0.522   | 0.282     | 8e-06            | NA                    | Hypermethylated in FP vs FN |
| cg04763450 | 0.581   | 0.244   | 0.336     | 8e-06            | NA                    | Hypermethylated in FP vs FN |
| cg24102622 | 0.763   | 0.363   | 0.399     | 8e-06            | NA                    | Hypermethylated in FP vs FN |
| cg03800922 | 0.501   | 0.216   | 0.285     | 8e-06            | NA                    | Hypermethylated in FP vs FN |
| cg11984971 | 0.713   | 0.398   | 0.314     | 8e-06            | NA                    | Hypermethylated in FP vs FN |
| cg00270789 | 0.423   | 0.159   | 0.264     | 8e-06            | GPT2                  | Hypermethylated in FP vs FN |
| cg15496763 | 0.754   | 0.439   | 0.316     | 8e-06            | NA                    | Hypermethylated in FP vs FN |
| cg24831725 | 0.680   | 0.376   | 0.304     | 8e-06            | NA                    | Hypermethylated in FP vs FN |
| cg12589798 | 0.770   | 0.484   | 0.285     | 8e-06            | NA                    | Hypermethylated in FP vs FN |
| cg06997184 | 0.593   | 0.311   | 0.282     | 8e-06            | NA                    | Hypermethylated in FP vs FN |
| cg02539682 | 0.522   | 0.257   | 0.264     | 8e-06            | NA                    | Hypermethylated in FP vs FN |
| cg12098511 | 0.774   | 0.488   | 0.286     | 8e-06            | NA                    | Hypermethylated in FP vs FN |
| cg06070132 | 0.819   | 0.514   | 0.305     | 8e-06            | NA                    | Hypermethylated in FP vs FN |
| cg10949576 | 0.729   | 0.467   | 0.262     | 8e-06            | C11orf66              | Hypermethylated in FP vs FN |
| cg09722236 | 0.850   | 0.563   | 0.288     | 8e-06            | NA                    | Hypermethylated in FP vs FN |
| cg26201952 | 0.748   | 0.449   | 0.300     | 8e-06            | HOXC4                 | Hypermethylated in FP vs FN |
| cg10995640 | 0.420   | 0.138   | 0.282     | 8e-06            | SULF1                 | Hypermethylated in FP vs FN |
| cg13293535 | 0.793   | 0.437   | 0.356     | 8e-06            | NA                    | Hypermethylated in FP vs FN |
| cg10101600 | 0.490   | 0.227   | 0.263     | 8e-06            | NA                    | Hypermethylated in FP vs FN |
| cg01546047 | 0.681   | 0.422   | 0.260     | 8e-06            | SPON2                 | Hypermethylated in FP vs FN |
| cg26728422 | 0.609   | 0.281   | 0.328     | 8e-06            | NA                    | Hypermethylated in FP vs FN |
| cg03191919 | 0.624   | 0.343   | 0.280     | 8e-06            | NA                    | Hypermethylated in FP vs FN |
| cg04021592 | 0.756   | 0.471   | 0.284     | 8e-06            | NA                    | Hypermethylated in FP vs FN |
| cg08563570 | 0.753   | 0.484   | 0.269     | 8e-06            | NA                    | Hypermethylated in FP vs FN |

### Supplementary Table 7 (continued)

| Probe      | FP.mean | FN.mean | Mean.diff | Adjusted.P.value | Promoter.related.gene | Category                    |
|------------|---------|---------|-----------|------------------|-----------------------|-----------------------------|
| cg24993194 | 0.531   | 0.216   | 0.314     | 8e-06            | NA                    | Hypermethylated in FP vs FN |
| cg02201239 | 0.581   | 0.277   | 0.304     | 8e-06            | NA                    | Hypermethylated in FP vs FN |
| cg11171811 | 0.756   | 0.505   | 0.252     | 8e-06            | LTBP3                 | Hypermethylated in FP vs FN |
| cg21977234 | 0.819   | 0.477   | 0.343     | 8e-06            | NA                    | Hypermethylated in FP vs FN |
| cg25834768 | 0.776   | 0.413   | 0.363     | 8e-06            | NA                    | Hypermethylated in FP vs FN |
| cg14422093 | 0.521   | 0.218   | 0.303     | 8e-06            | NA                    | Hypermethylated in FP vs FN |
| cg12710899 | 0.756   | 0.401   | 0.355     | 8e-06            | NA                    | Hypermethylated in FP vs FN |
| cg14640174 | 0.836   | 0.555   | 0.281     | 8e-06            | NA                    | Hypermethylated in FP vs FN |
| cg06760518 | 0.659   | 0.230   | 0.430     | 8e-06            | NA                    | Hypermethylated in FP vs FN |
| cg19082560 | 0.700   | 0.318   | 0.383     | 8e-06            | NA                    | Hypermethylated in FP vs FN |
| cg11382963 | 0.368   | 0.100   | 0.268     | 8e-06            | NA                    | Hypermethylated in FP vs FN |
| cg11962640 | 0.690   | 0.319   | 0.370     | 8e-06            | NA                    | Hypermethylated in FP vs FN |
| cg25505106 | 0.498   | 0.234   | 0.264     | 8e-06            | NA                    | Hypermethylated in FP vs FN |
| cg08777813 | 0.651   | 0.398   | 0.252     | 8e-06            | NA                    | Hypermethylated in FP vs FN |
| cg03085712 | 0.621   | 0.262   | 0.359     | 8e-06            | ATP2C2                | Hypermethylated in FP vs FN |
| cg01290153 | 0.695   | 0.442   | 0.253     | 8e-06            | ZNF628                | Hypermethylated in FP vs FN |
| cg16298927 | 0.755   | 0.430   | 0.325     | 8e-06            | NA                    | Hypermethylated in FP vs FN |
| cg23624452 | 0.766   | 0.447   | 0.319     | 8e-06            | NA                    | Hypermethylated in FP vs FN |
| cg22191606 | 0.572   | 0.237   | 0.335     | 8e-06            | NA                    | Hypermethylated in FP vs FN |
| cg17128892 | 0.775   | 0.448   | 0.326     | 8e-06            | NA                    | Hypermethylated in FP vs FN |
| cg22218316 | 0.698   | 0.447   | 0.250     | 8e-06            | NA                    | Hypermethylated in FP vs FN |
| cg02225085 | 0.648   | 0.331   | 0.317     | 8e-06            | NA                    | Hypermethylated in FP vs FN |
| cg10473266 | 0.790   | 0.495   | 0.295     | 9e-06            | NA                    | Hypermethylated in FP vs FN |
| cg14996220 | 0.437   | 0.101   | 0.336     | 9e-06            | ALX1                  | Hypermethylated in FP vs FN |
| cg18182216 | 0.730   | 0.475   | 0.255     | 9e-06            | NA                    | Hypermethylated in FP vs FN |

### Supplementary Table 7 (continued)

| Probe      | FP.mean | FN.mean | Mean.diff | Adjusted.P.value | Promoter.related.gene | Category                    |
|------------|---------|---------|-----------|------------------|-----------------------|-----------------------------|
| cg01137760 | 0.323   | 0.068   | 0.255     | 9e-06            | NA                    | Hypermethylated in FP vs FN |
| cg18516158 | 0.451   | 0.158   | 0.293     | 9e-06            | NA                    | Hypermethylated in FP vs FN |
| cg09252331 | 0.703   | 0.444   | 0.258     | 9e-06            | NA                    | Hypermethylated in FP vs FN |
| cg17691988 | 0.751   | 0.472   | 0.279     | 9e-06            | NA                    | Hypermethylated in FP vs FN |
| cg04365452 | 0.492   | 0.186   | 0.307     | 9e-06            | NA                    | Hypermethylated in FP vs FN |
| cg08896420 | 0.818   | 0.562   | 0.256     | 9e-06            | NA                    | Hypermethylated in FP vs FN |
| cg01763890 | 0.672   | 0.300   | 0.371     | 9e-06            | NA                    | Hypermethylated in FP vs FN |
| cg04007792 | 0.865   | 0.614   | 0.251     | 9e-06            | NA                    | Hypermethylated in FP vs FN |
| cg10707081 | 0.530   | 0.268   | 0.261     | 9e-06            | NA                    | Hypermethylated in FP vs FN |
| cg08530879 | 0.744   | 0.478   | 0.266     | 9e-06            | NA                    | Hypermethylated in FP vs FN |
| cg00677574 | 0.637   | 0.327   | 0.310     | 9e-06            | NA                    | Hypermethylated in FP vs FN |
| cg25238537 | 0.562   | 0.290   | 0.273     | 9e-06            | NA                    | Hypermethylated in FP vs FN |
| cg03902450 | 0.614   | 0.234   | 0.380     | 9e-06            | NA                    | Hypermethylated in FP vs FN |
| cg24232444 | 0.725   | 0.394   | 0.331     | 9e-06            | NA                    | Hypermethylated in FP vs FN |
| cg26225847 | 0.817   | 0.555   | 0.263     | 9e-06            | NA                    | Hypermethylated in FP vs FN |
| cg21172011 | 0.647   | 0.318   | 0.329     | 9e-06            | NA                    | Hypermethylated in FP vs FN |
| cg16686396 | 0.733   | 0.454   | 0.279     | 9e-06            | NA                    | Hypermethylated in FP vs FN |
| cg14176752 | 0.486   | 0.149   | 0.337     | 9e-06            | NA                    | Hypermethylated in FP vs FN |
| cg17942618 | 0.636   | 0.349   | 0.287     | 9e-06            | NA                    | Hypermethylated in FP vs FN |
| cg10444491 | 0.741   | 0.460   | 0.281     | 9e-06            | NA                    | Hypermethylated in FP vs FN |
| cg01787574 | 0.622   | 0.249   | 0.373     | 9e-06            | NA                    | Hypermethylated in FP vs FN |
| cg18475969 | 0.472   | 0.192   | 0.280     | 9e-06            | NA                    | Hypermethylated in FP vs FN |
| cg15548295 | 0.856   | 0.512   | 0.344     | 9e-06            | NA                    | Hypermethylated in FP vs FN |
| cg21496187 | 0.740   | 0.470   | 0.270     | 9e-06            | NA                    | Hypermethylated in FP vs FN |
| cg15101980 | 0.491   | 0.217   | 0.274     | 9e-06            | ARSI                  | Hypermethylated in FP vs FN |



### Supplementary Table 7 (continued)

| Probe      | FP.mean | FN.mean | Mean.diff | Adjusted.P.value | Promoter.related.gene | Category                    |
|------------|---------|---------|-----------|------------------|-----------------------|-----------------------------|
| cg07011029 | 0.630   | 0.340   | 0.290     | 9e-06            | NA                    | Hypermethylated in FP vs FN |
| cg20634514 | 0.717   | 0.407   | 0.310     | 9e-06            | NA                    | Hypermethylated in FP vs FN |
| cg27518375 | 0.814   | 0.533   | 0.281     | 9e-06            | NA                    | Hypermethylated in FP vs FN |
| cg08877357 | 0.706   | 0.380   | 0.326     | 9e-06            | NA                    | Hypermethylated in FP vs FN |
| cg18864124 | 0.798   | 0.519   | 0.279     | 9e-06            | NA                    | Hypermethylated in FP vs FN |
| cg10895922 | 0.428   | 0.141   | 0.287     | 9e-06            | NKX2-5                | Hypermethylated in FP vs FN |
| cg07673230 | 0.826   | 0.530   | 0.297     | 9e-06            | NA                    | Hypermethylated in FP vs FN |
| cg09746261 | 0.732   | 0.446   | 0.287     | 1e-05            | NA                    | Hypermethylated in FP vs FN |
| cg26557925 | 0.677   | 0.392   | 0.285     | 1e-05            | NA                    | Hypermethylated in FP vs FN |
| cg17043222 | 0.838   | 0.558   | 0.280     | 1e-05            | HLA-DQB2              | Hypermethylated in FP vs FN |
| cg12071544 | 0.695   | 0.280   | 0.414     | 1e-05            | NA                    | Hypermethylated in FP vs FN |
| cg00402668 | 0.763   | 0.460   | 0.302     | 1e-05            | NA                    | Hypermethylated in FP vs FN |
| cg07041470 | 0.521   | 0.235   | 0.286     | 1e-05            | GPRIN2                | Hypermethylated in FP vs FN |
| cg11309217 | 0.811   | 0.508   | 0.304     | 1e-05            | NA                    | Hypermethylated in FP vs FN |
| cg25010691 | 0.561   | 0.300   | 0.261     | 1e-05            | NA                    | Hypermethylated in FP vs FN |
| cg16697433 | 0.885   | 0.626   | 0.260     | 1e-05            | NA                    | Hypermethylated in FP vs FN |
| cg17636986 | 0.677   | 0.365   | 0.312     | 1e-05            | NA                    | Hypermethylated in FP vs FN |
| cg07543830 | 0.791   | 0.396   | 0.395     | 1e-05            | NA                    | Hypermethylated in FP vs FN |
| cg23126203 | 0.651   | 0.388   | 0.262     | 1e-05            | NA                    | Hypermethylated in FP vs FN |
| cg16197186 | 0.860   | 0.574   | 0.286     | 1e-05            | NA                    | Hypermethylated in FP vs FN |
| cg05378452 | 0.719   | 0.413   | 0.307     | 1e-05            | NA                    | Hypermethylated in FP vs FN |
| cg15688628 | 0.618   | 0.356   | 0.262     | 1e-05            | NA                    | Hypermethylated in FP vs FN |
| cg10357060 | 0.599   | 0.243   | 0.356     | 1e-05            | NA                    | Hypermethylated in FP vs FN |
| cg10706389 | 0.505   | 0.177   | 0.328     | 1e-05            | NA                    | Hypermethylated in FP vs FN |
| cg09029193 | 0.679   | 0.399   | 0.281     | 1e-05            | NA                    | Hypermethylated in FP vs FN |

### Supplementary Table 7 (continued)

| Probe      | FP.mean | FN.mean | Mean.diff | Adjusted.P.value | Promoter.related.gene | Category                    |
|------------|---------|---------|-----------|------------------|-----------------------|-----------------------------|
| cg27327647 | 0.654   | 0.323   | 0.331     | 1e-05            | NA                    | Hypermethylated in FP vs FN |
| cg01691827 | 0.797   | 0.526   | 0.271     | 1e-05            | NA                    | Hypermethylated in FP vs FN |
| cg21588305 | 0.824   | 0.525   | 0.299     | 1e-05            | NNAT                  | Hypermethylated in FP vs FN |
| cg20784259 | 0.729   | 0.414   | 0.316     | 1e-05            | NA                    | Hypermethylated in FP vs FN |
| cg09941406 | 0.605   | 0.245   | 0.359     | 1e-05            | NA                    | Hypermethylated in FP vs FN |
| cg14481469 | 0.746   | 0.474   | 0.271     | 1e-05            | NA                    | Hypermethylated in FP vs FN |
| cg18688704 | 0.680   | 0.373   | 0.306     | 1e-05            | NA                    | Hypermethylated in FP vs FN |
| cg14546497 | 0.631   | 0.373   | 0.257     | 1e-05            | NA                    | Hypermethylated in FP vs FN |
| cg03075709 | 0.664   | 0.329   | 0.334     | 1e-05            | NA                    | Hypermethylated in FP vs FN |
| cg24011500 | 0.706   | 0.448   | 0.259     | 1e-05            | NA                    | Hypermethylated in FP vs FN |
| cg26948603 | 0.414   | 0.104   | 0.311     | 1e-05            | DRD1                  | Hypermethylated in FP vs FN |
| cg19759788 | 0.623   | 0.277   | 0.346     | 1e-05            | FBLIM1                | Hypermethylated in FP vs FN |
| cg10143811 | 0.708   | 0.324   | 0.384     | 1e-05            | NA                    | Hypermethylated in FP vs FN |
| cg23725149 | 0.545   | 0.250   | 0.295     | 1e-05            | NA                    | Hypermethylated in FP vs FN |
| cg05415871 | 0.874   | 0.560   | 0.314     | 1e-05            | NA                    | Hypermethylated in FP vs FN |
| cg23272632 | 0.371   | 0.062   | 0.309     | 1e-05            | NA                    | Hypermethylated in FP vs FN |
| cg03285577 | 0.699   | 0.348   | 0.351     | 1e-05            | NA                    | Hypermethylated in FP vs FN |
| cg19070138 | 0.703   | 0.403   | 0.301     | 1e-05            | NA                    | Hypermethylated in FP vs FN |
| cg06282596 | 0.702   | 0.368   | 0.334     | 1e-05            | NA                    | Hypermethylated in FP vs FN |
| cg11123440 | 0.840   | 0.532   | 0.308     | 1e-05            | NA                    | Hypermethylated in FP vs FN |
| cg04930596 | 0.560   | 0.303   | 0.257     | 1e-05            | NA                    | Hypermethylated in FP vs FN |
| cg05232207 | 0.628   | 0.361   | 0.267     | 1e-05            | NA                    | Hypermethylated in FP vs FN |
| cg00952789 | 0.687   | 0.419   | 0.268     | 1e-05            | NA                    | Hypermethylated in FP vs FN |
| cg16461139 | 0.798   | 0.488   | 0.310     | 1e-05            | NA                    | Hypermethylated in FP vs FN |
| cg01047028 | 0.889   | 0.628   | 0.261     | 1e-05            | NA                    | Hypermethylated in FP vs FN |

### Supplementary Table 7 (continued)

| Probe      | FP.mean | FN.mean | Mean.diff | Adjusted.P.value | Promoter.related.gene | Category                    |
|------------|---------|---------|-----------|------------------|-----------------------|-----------------------------|
| cg00070042 | 0.658   | 0.386   | 0.271     | 1e-05            | NA                    | Hypermethylated in FP vs FN |
| cg14121185 | 0.804   | 0.543   | 0.261     | 1e-05            | NA                    | Hypermethylated in FP vs FN |
| cg24504942 | 0.826   | 0.572   | 0.254     | 1e-05            | NA                    | Hypermethylated in FP vs FN |
| cg02638458 | 0.721   | 0.419   | 0.302     | 1e-05            | NA                    | Hypermethylated in FP vs FN |
| cg16617301 | 0.570   | 0.279   | 0.291     | 1e-05            | PNMAL2                | Hypermethylated in FP vs FN |
| cg25245338 | 0.785   | 0.485   | 0.300     | 1e-05            | TIMP3                 | Hypermethylated in FP vs FN |
| cg14393034 | 0.789   | 0.458   | 0.331     | 1e-05            | NA                    | Hypermethylated in FP vs FN |
| cg15991082 | 0.726   | 0.471   | 0.255     | 1e-05            | NA                    | Hypermethylated in FP vs FN |
| cg21797718 | 0.736   | 0.453   | 0.283     | 1e-05            | NA                    | Hypermethylated in FP vs FN |
| cg06913593 | 0.617   | 0.344   | 0.273     | 1e-05            | NA                    | Hypermethylated in FP vs FN |
| cg01182863 | 0.750   | 0.416   | 0.334     | 1e-05            | NA                    | Hypermethylated in FP vs FN |
| cg03478739 | 0.694   | 0.419   | 0.275     | 1e-05            | NA                    | Hypermethylated in FP vs FN |
| cg25295740 | 0.763   | 0.491   | 0.271     | 1e-05            | NA                    | Hypermethylated in FP vs FN |
| cg12623852 | 0.769   | 0.365   | 0.404     | 1e-05            | NA                    | Hypermethylated in FP vs FN |
| cg26135831 | 0.694   | 0.411   | 0.283     | 1e-05            | NA                    | Hypermethylated in FP vs FN |
| cg13829680 | 0.750   | 0.447   | 0.302     | 1e-05            | NA                    | Hypermethylated in FP vs FN |
| cg09241174 | 0.833   | 0.563   | 0.270     | 1e-05            | NA                    | Hypermethylated in FP vs FN |
| cg08042258 | 0.703   | 0.393   | 0.310     | 1e-05            | NA                    | Hypermethylated in FP vs FN |
| cg20463927 | 0.551   | 0.249   | 0.302     | 1e-05            | NA                    | Hypermethylated in FP vs FN |
| cg17203352 | 0.640   | 0.364   | 0.276     | 1e-05            | WFIKKN2               | Hypermethylated in FP vs FN |
| cg22353096 | 0.536   | 0.268   | 0.267     | 1e-05            | NA                    | Hypermethylated in FP vs FN |
| cg09879107 | 0.857   | 0.599   | 0.258     | 1e-05            | CNR1                  | Hypermethylated in FP vs FN |
| cg03587907 | 0.770   | 0.432   | 0.338     | 1e-05            | NA                    | Hypermethylated in FP vs FN |
| cg19492423 | 0.636   | 0.282   | 0.354     | 1e-05            | NA                    | Hypermethylated in FP vs FN |
| cg14016177 | 0.568   | 0.300   | 0.267     | 1e-05            | NA                    | Hypermethylated in FP vs FN |

### Supplementary Table 7 (continued)

| Probe      | FP.mean | FN.mean | Mean.diff | Adjusted.P.value | Promoter.related.gene | Category                    |
|------------|---------|---------|-----------|------------------|-----------------------|-----------------------------|
| cg06759993 | 0.543   | 0.241   | 0.302     | 1e-05            | NA                    | Hypermethylated in FP vs FN |
| cg20917920 | 0.829   | 0.548   | 0.282     | 1e-05            | NA                    | Hypermethylated in FP vs FN |
| cg01406536 | 0.450   | 0.111   | 0.339     | 1e-05            | NA                    | Hypermethylated in FP vs FN |
| cg07135237 | 0.599   | 0.278   | 0.321     | 1e-05            | NA                    | Hypermethylated in FP vs FN |
| cg26605891 | 0.616   | 0.366   | 0.250     | 1e-05            | NA                    | Hypermethylated in FP vs FN |
| cg22200649 | 0.743   | 0.431   | 0.312     | 1e-05            | NA                    | Hypermethylated in FP vs FN |
| cg15615586 | 0.824   | 0.532   | 0.292     | 1e-05            | NA                    | Hypermethylated in FP vs FN |
| cg18116753 | 0.851   | 0.593   | 0.257     | 1e-05            | NA                    | Hypermethylated in FP vs FN |
| cg00769775 | 0.358   | 0.105   | 0.253     | 1e-05            | NA                    | Hypermethylated in FP vs FN |
| cg10337322 | 0.570   | 0.195   | 0.376     | 1e-05            | NA                    | Hypermethylated in FP vs FN |
| cg26757472 | 0.810   | 0.504   | 0.305     | 1e-05            | NA                    | Hypermethylated in FP vs FN |
| cg00923533 | 0.732   | 0.471   | 0.261     | 1e-05            | NA                    | Hypermethylated in FP vs FN |
| cg08215318 | 0.777   | 0.438   | 0.340     | 1e-05            | NA                    | Hypermethylated in FP vs FN |
| cg00186815 | 0.779   | 0.491   | 0.287     | 1e-05            | NA                    | Hypermethylated in FP vs FN |
| cg07540326 | 0.833   | 0.512   | 0.321     | 1e-05            | NA                    | Hypermethylated in FP vs FN |
| cg21404063 | 0.703   | 0.345   | 0.357     | 1e-05            | NA                    | Hypermethylated in FP vs FN |
| cg08160224 | 0.623   | 0.342   | 0.281     | 1e-05            | NA                    | Hypermethylated in FP vs FN |
| cg05279092 | 0.679   | 0.279   | 0.400     | 1e-05            | NA                    | Hypermethylated in FP vs FN |
| cg02981183 | 0.768   | 0.462   | 0.306     | 1e-05            | NA                    | Hypermethylated in FP vs FN |
| cg16616514 | 0.790   | 0.524   | 0.265     | 1e-05            | NA                    | Hypermethylated in FP vs FN |
| cg22643751 | 0.401   | 0.133   | 0.268     | 1e-05            | UNC84A                | Hypermethylated in FP vs FN |
| cg24758426 | 0.611   | 0.250   | 0.361     | 1e-05            | NA                    | Hypermethylated in FP vs FN |
| cg13178597 | 0.661   | 0.381   | 0.280     | 1e-05            | NA                    | Hypermethylated in FP vs FN |
| cg03536664 | 0.763   | 0.475   | 0.288     | 1e-05            | NA                    | Hypermethylated in FP vs FN |
| cg06808089 | 0.596   | 0.327   | 0.269     | 1e-05            | NA                    | Hypermethylated in FP vs FN |

### Supplementary Table 7 (continued)

| Probe      | FP.mean | FN.mean | Mean.diff | Adjusted.P.value | Promoter.related.gene | Category                    |
|------------|---------|---------|-----------|------------------|-----------------------|-----------------------------|
| cg06497848 | 0.795   | 0.438   | 0.357     | 1e-05            | NA                    | Hypermethylated in FP vs FN |
| cg04942251 | 0.661   | 0.293   | 0.368     | 1e-05            | NA                    | Hypermethylated in FP vs FN |
| cg21151017 | 0.736   | 0.437   | 0.299     | 1e-05            | NA                    | Hypermethylated in FP vs FN |
| cg16085649 | 0.635   | 0.361   | 0.274     | 1e-05            | NA                    | Hypermethylated in FP vs FN |
| cg09828761 | 0.768   | 0.478   | 0.290     | 1e-05            | NA                    | Hypermethylated in FP vs FN |
| cg03094519 | 0.489   | 0.180   | 0.310     | 1e-05            | NA                    | Hypermethylated in FP vs FN |
| cg19350197 | 0.772   | 0.485   | 0.288     | 1e-05            | NA                    | Hypermethylated in FP vs FN |
| cg18022921 | 0.681   | 0.422   | 0.259     | 1e-05            | VEGFA                 | Hypermethylated in FP vs FN |
| cg27316067 | 0.726   | 0.361   | 0.365     | 1e-05            | NA                    | Hypermethylated in FP vs FN |
| cg19739126 | 0.609   | 0.327   | 0.282     | 1e-05            | NA                    | Hypermethylated in FP vs FN |
| cg14328115 | 0.650   | 0.270   | 0.380     | 1e-05            | NA                    | Hypermethylated in FP vs FN |
| cg01655667 | 0.548   | 0.226   | 0.322     | 1e-05            | NA                    | Hypermethylated in FP vs FN |
| cg08117745 | 0.855   | 0.592   | 0.263     | 1e-05            | NA                    | Hypermethylated in FP vs FN |
| cg06539938 | 0.686   | 0.402   | 0.284     | 1e-05            | NA                    | Hypermethylated in FP vs FN |
| cg03307103 | 0.786   | 0.464   | 0.322     | 1e-05            | NA                    | Hypermethylated in FP vs FN |
| cg12797746 | 0.791   | 0.450   | 0.341     | 1e-05            | NA                    | Hypermethylated in FP vs FN |
| cg05803853 | 0.799   | 0.515   | 0.284     | 1e-05            | NA                    | Hypermethylated in FP vs FN |
| cg05266226 | 0.786   | 0.522   | 0.264     | 1e-05            | NA                    | Hypermethylated in FP vs FN |
| cg20821442 | 0.639   | 0.361   | 0.278     | 1e-05            | NA                    | Hypermethylated in FP vs FN |
| cg23323891 | 0.628   | 0.358   | 0.269     | 1e-05            | NA                    | Hypermethylated in FP vs FN |
| cg05431528 | 0.666   | 0.369   | 0.297     | 1e-05            | NA                    | Hypermethylated in FP vs FN |
| cg22967396 | 0.704   | 0.358   | 0.345     | 1e-05            | NA                    | Hypermethylated in FP vs FN |
| cg04689048 | 0.494   | 0.195   | 0.299     | 1e-05            | PNMAL2                | Hypermethylated in FP vs FN |
| cg25188975 | 0.834   | 0.569   | 0.266     | 1e-05            | NA                    | Hypermethylated in FP vs FN |
| cg22610388 | 0.760   | 0.501   | 0.259     | 1e-05            | NA                    | Hypermethylated in FP vs FN |

### Supplementary Table 7 (continued)

| Probe      | FP.mean | FN.mean | Mean.diff | Adjusted.P.value | Promoter.related.gene | Category                    |
|------------|---------|---------|-----------|------------------|-----------------------|-----------------------------|
| cg26541218 | 0.638   | 0.375   | 0.263     | 1e-05            | NA                    | Hypermethylated in FP vs FN |
| cg12871967 | 0.753   | 0.479   | 0.274     | 1e-05            | NA                    | Hypermethylated in FP vs FN |
| cg25955692 | 0.872   | 0.539   | 0.333     | 1e-05            | NA                    | Hypermethylated in FP vs FN |
| cg02723856 | 0.580   | 0.244   | 0.337     | 1e-05            | NA                    | Hypermethylated in FP vs FN |
| cg22357164 | 0.442   | 0.189   | 0.254     | 1e-05            | NA                    | Hypermethylated in FP vs FN |
| cg21403761 | 0.736   | 0.482   | 0.253     | 1e-05            | NA                    | Hypermethylated in FP vs FN |
| cg24936179 | 0.891   | 0.623   | 0.268     | 1e-05            | NA                    | Hypermethylated in FP vs FN |
| cg16181396 | 0.765   | 0.358   | 0.407     | 1e-05            | ZIC1                  | Hypermethylated in FP vs FN |
| cg05665202 | 0.607   | 0.290   | 0.317     | 1e-05            | NA                    | Hypermethylated in FP vs FN |
| cg13336642 | 0.393   | 0.123   | 0.270     | 1e-05            | NA                    | Hypermethylated in FP vs FN |
| cg21353144 | 0.714   | 0.375   | 0.340     | 1e-05            | NA                    | Hypermethylated in FP vs FN |
| cg27097846 | 0.624   | 0.371   | 0.253     | 1e-05            | TENC1                 | Hypermethylated in FP vs FN |
| cg17298181 | 0.525   | 0.173   | 0.352     | 1e-05            | NA                    | Hypermethylated in FP vs FN |
| cg16277725 | 0.511   | 0.233   | 0.278     | 1e-05            | NA                    | Hypermethylated in FP vs FN |
| cg15793573 | 0.944   | 0.676   | 0.269     | 1e-05            | NA                    | Hypermethylated in FP vs FN |
| cg14078714 | 0.641   | 0.344   | 0.298     | 1e-05            | NA                    | Hypermethylated in FP vs FN |
| cg22551145 | 0.671   | 0.386   | 0.285     | 1e-05            | NA                    | Hypermethylated in FP vs FN |
| cg03206569 | 0.842   | 0.566   | 0.276     | 1e-05            | NA                    | Hypermethylated in FP vs FN |
| cg12942328 | 0.451   | 0.119   | 0.332     | 1e-05            | BCL6                  | Hypermethylated in FP vs FN |
| cg14496909 | 0.749   | 0.356   | 0.393     | 1e-05            | NA                    | Hypermethylated in FP vs FN |
| cg04948649 | 0.831   | 0.513   | 0.318     | 1e-05            | NA                    | Hypermethylated in FP vs FN |
| cg07410188 | 0.573   | 0.239   | 0.333     | 1e-05            | NA                    | Hypermethylated in FP vs FN |
| cg17977470 | 0.828   | 0.507   | 0.321     | 1e-05            | NA                    | Hypermethylated in FP vs FN |
| cg00475509 | 0.813   | 0.429   | 0.384     | 1e-05            | ZIC1                  | Hypermethylated in FP vs FN |
| cg14561362 | 0.677   | 0.399   | 0.279     | 1e-05            | NA                    | Hypermethylated in FP vs FN |

### Supplementary Table 7 (continued)

| Probe      | FP.mean | FN.mean | Mean.diff | Adjusted.P.value | Promoter.related.gene | Category                    |
|------------|---------|---------|-----------|------------------|-----------------------|-----------------------------|
| cg00831276 | 0.763   | 0.511   | 0.252     | 1e-05            | NA                    | Hypermethylated in FP vs FN |
| cg08326370 | 0.584   | 0.227   | 0.357     | 1e-05            | NA                    | Hypermethylated in FP vs FN |
| cg07336123 | 0.611   | 0.344   | 0.267     | 1e-05            | NA                    | Hypermethylated in FP vs FN |
| cg12613129 | 0.584   | 0.330   | 0.254     | 1e-05            | NA                    | Hypermethylated in FP vs FN |
| cg00118808 | 0.582   | 0.322   | 0.260     | 1e-05            | NA                    | Hypermethylated in FP vs FN |
| cg16338011 | 0.850   | 0.582   | 0.268     | 1e-05            | NA                    | Hypermethylated in FP vs FN |
| cg01921323 | 0.690   | 0.388   | 0.303     | 1e-05            | NA                    | Hypermethylated in FP vs FN |
| cg09648467 | 0.570   | 0.255   | 0.315     | 1e-05            | NA                    | Hypermethylated in FP vs FN |
| cg12399536 | 0.475   | 0.209   | 0.266     | 1e-05            | NA                    | Hypermethylated in FP vs FN |
| cg08227583 | 0.640   | 0.365   | 0.275     | 1e-05            | NA                    | Hypermethylated in FP vs FN |
| cg03365751 | 0.715   | 0.398   | 0.317     | 1e-05            | NFAM1                 | Hypermethylated in FP vs FN |
| cg21251385 | 0.789   | 0.409   | 0.381     | 1e-05            | NA                    | Hypermethylated in FP vs FN |
| cg10308949 | 0.738   | 0.487   | 0.251     | 1e-05            | C22orf40              | Hypermethylated in FP vs FN |
| cg20502977 | 0.733   | 0.471   | 0.262     | 1e-05            | NA                    | Hypermethylated in FP vs FN |
| cg26964636 | 0.758   | 0.457   | 0.301     | 1e-05            | NA                    | Hypermethylated in FP vs FN |
| cg05689267 | 0.728   | 0.466   | 0.263     | 1e-05            | NA                    | Hypermethylated in FP vs FN |
| cg14867741 | 0.778   | 0.498   | 0.281     | 1e-05            | NA                    | Hypermethylated in FP vs FN |
| cg03465499 | 0.467   | 0.206   | 0.261     | 1e-05            | MRGPRF                | Hypermethylated in FP vs FN |
| cg01147467 | 0.812   | 0.506   | 0.306     | 1e-05            | NA                    | Hypermethylated in FP vs FN |
| cg13525877 | 0.814   | 0.518   | 0.296     | 2e-05            | NA                    | Hypermethylated in FP vs FN |
| cg06411129 | 0.806   | 0.478   | 0.327     | 2e-05            | NA                    | Hypermethylated in FP vs FN |
| cg23468878 | 0.496   | 0.233   | 0.263     | 2e-05            | ZIC1                  | Hypermethylated in FP vs FN |
| cg13710297 | 0.624   | 0.367   | 0.257     | 2e-05            | NA                    | Hypermethylated in FP vs FN |
| cg07451370 | 0.745   | 0.422   | 0.322     | 2e-05            | NA                    | Hypermethylated in FP vs FN |
| cg10111816 | 0.737   | 0.472   | 0.265     | 2e-05            | NA                    | Hypermethylated in FP vs FN |

### Supplementary Table 7 (continued)

| Probe      | FP.mean | FN.mean | Mean.diff | Adjusted.P.value | Promoter.related.gene | Category                    |
|------------|---------|---------|-----------|------------------|-----------------------|-----------------------------|
| cg18451814 | 0.758   | 0.387   | 0.370     | 2e-05            | OTX2                  | Hypermethylated in FP vs FN |
| cg09085932 | 0.646   | 0.391   | 0.255     | 2e-05            | NA                    | Hypermethylated in FP vs FN |
| cg07997634 | 0.629   | 0.363   | 0.266     | 2e-05            | NA                    | Hypermethylated in FP vs FN |
| cg09377980 | 0.777   | 0.520   | 0.257     | 2e-05            | NA                    | Hypermethylated in FP vs FN |
| cg26940676 | 0.735   | 0.397   | 0.337     | 2e-05            | NA                    | Hypermethylated in FP vs FN |
| cg09806934 | 0.340   | 0.089   | 0.251     | 2e-05            | NA                    | Hypermethylated in FP vs FN |
| cg15155441 | 0.799   | 0.516   | 0.283     | 2e-05            | APLNR                 | Hypermethylated in FP vs FN |
| cg19393677 | 0.709   | 0.445   | 0.264     | 2e-05            | NA                    | Hypermethylated in FP vs FN |
| cg24586554 | 0.693   | 0.442   | 0.250     | 2e-05            | NA                    | Hypermethylated in FP vs FN |
| cg04135110 | 0.542   | 0.276   | 0.266     | 2e-05            | NA                    | Hypermethylated in FP vs FN |
| cg15849703 | 0.625   | 0.349   | 0.275     | 2e-05            | NA                    | Hypermethylated in FP vs FN |
| cg14557202 | 0.726   | 0.380   | 0.347     | 2e-05            | NA                    | Hypermethylated in FP vs FN |
| cg11006960 | 0.822   | 0.558   | 0.264     | 2e-05            | NA                    | Hypermethylated in FP vs FN |
| cg22231101 | 0.633   | 0.363   | 0.270     | 2e-05            | NA                    | Hypermethylated in FP vs FN |
| cg24142603 | 0.729   | 0.321   | 0.407     | 2e-05            | NA                    | Hypermethylated in FP vs FN |
| cg23259394 | 0.726   | 0.465   | 0.262     | 2e-05            | NA                    | Hypermethylated in FP vs FN |
| cg25003275 | 0.436   | 0.178   | 0.258     | 2e-05            | NA                    | Hypermethylated in FP vs FN |
| cg12968041 | 0.755   | 0.473   | 0.282     | 2e-05            | NA                    | Hypermethylated in FP vs FN |
| cg20454073 | 0.737   | 0.343   | 0.394     | 2e-05            | NA                    | Hypermethylated in FP vs FN |
| cg09246103 | 0.776   | 0.506   | 0.270     | 2e-05            | NA                    | Hypermethylated in FP vs FN |
| cg16171838 | 0.684   | 0.282   | 0.403     | 2e-05            | ACVR1C                | Hypermethylated in FP vs FN |
| cg03127506 | 0.809   | 0.535   | 0.273     | 2e-05            | NA                    | Hypermethylated in FP vs FN |
| cg09762897 | 0.547   | 0.261   | 0.286     | 2e-05            | NA                    | Hypermethylated in FP vs FN |
| cg26575450 | 0.622   | 0.304   | 0.318     | 2e-05            | NA                    | Hypermethylated in FP vs FN |
| cg14262439 | 0.404   | 0.069   | 0.335     | 2e-05            | NA                    | Hypermethylated in FP vs FN |



### Supplementary Table 7 (continued)

| Probe      | FP.mean | FN.mean | Mean.diff | Adjusted.P.value | Promoter.related.gene | Category                    |
|------------|---------|---------|-----------|------------------|-----------------------|-----------------------------|
| cg01190109 | 0.760   | 0.450   | 0.310     | 2e-05            | NA                    | Hypermethylated in FP vs FN |
| cg00351735 | 0.813   | 0.551   | 0.262     | 2e-05            | NA                    | Hypermethylated in FP vs FN |
| cg14157107 | 0.754   | 0.474   | 0.280     | 2e-05            | NA                    | Hypermethylated in FP vs FN |
| cg24597207 | 0.776   | 0.513   | 0.263     | 2e-05            | NA                    | Hypermethylated in FP vs FN |
| cg17157798 | 0.789   | 0.528   | 0.261     | 2e-05            | NA                    | Hypermethylated in FP vs FN |
| cg12679760 | 0.565   | 0.267   | 0.298     | 2e-05            | NA                    | Hypermethylated in FP vs FN |
| cg16413842 | 0.778   | 0.513   | 0.265     | 2e-05            | NA                    | Hypermethylated in FP vs FN |
| cg03822639 | 0.635   | 0.319   | 0.316     | 2e-05            | PALLD                 | Hypermethylated in FP vs FN |
| cg21345949 | 0.755   | 0.489   | 0.267     | 2e-05            | C10orf125             | Hypermethylated in FP vs FN |
| cg03593189 | 0.628   | 0.288   | 0.340     | 2e-05            | NA                    | Hypermethylated in FP vs FN |
| cg17684207 | 0.544   | 0.243   | 0.301     | 2e-05            | LOC285796             | Hypermethylated in FP vs FN |
| cg26661922 | 0.756   | 0.416   | 0.340     | 2e-05            | NA                    | Hypermethylated in FP vs FN |
| cg23985995 | 0.669   | 0.334   | 0.335     | 2e-05            | NA                    | Hypermethylated in FP vs FN |
| cg16721977 | 0.534   | 0.281   | 0.254     | 2e-05            | ABLIM1                | Hypermethylated in FP vs FN |
| cg10705391 | 0.675   | 0.415   | 0.260     | 2e-05            | NA                    | Hypermethylated in FP vs FN |
| cg15952487 | 0.593   | 0.278   | 0.315     | 2e-05            | NA                    | Hypermethylated in FP vs FN |
| cg22016094 | 0.742   | 0.449   | 0.293     | 2e-05            | NA                    | Hypermethylated in FP vs FN |
| cg12757143 | 0.663   | 0.360   | 0.303     | 2e-05            | WDR85                 | Hypermethylated in FP vs FN |
| cg02981003 | 0.812   | 0.546   | 0.266     | 2e-05            | NA                    | Hypermethylated in FP vs FN |
| cg27098470 | 0.758   | 0.437   | 0.321     | 2e-05            | NFAM1                 | Hypermethylated in FP vs FN |
| cg00875382 | 0.622   | 0.362   | 0.260     | 2e-05            | NA                    | Hypermethylated in FP vs FN |
| cg23647784 | 0.564   | 0.313   | 0.251     | 2e-05            | NA                    | Hypermethylated in FP vs FN |
| cg04388244 | 0.678   | 0.366   | 0.312     | 2e-05            | NA                    | Hypermethylated in FP vs FN |
| cg27138204 | 0.762   | 0.459   | 0.302     | 2e-05            | NA                    | Hypermethylated in FP vs FN |
| cg12777753 | 0.821   | 0.571   | 0.250     | 2e-05            | NA                    | Hypermethylated in FP vs FN |

### Supplementary Table 7 (continued)

| Probe      | FP.mean | FN.mean | Mean.diff | Adjusted.P.value | Promoter.related.gene | Category                    |
|------------|---------|---------|-----------|------------------|-----------------------|-----------------------------|
| cg07091593 | 0.511   | 0.138   | 0.373     | 2e-05            | BCL6                  | Hypermethylated in FP vs FN |
| cg06900514 | 0.633   | 0.357   | 0.276     | 2e-05            | NA                    | Hypermethylated in FP vs FN |
| cg12112556 | 0.770   | 0.473   | 0.297     | 2e-05            | NA                    | Hypermethylated in FP vs FN |
| cg16701852 | 0.649   | 0.361   | 0.288     | 2e-05            | NA                    | Hypermethylated in FP vs FN |
| cg19312356 | 0.791   | 0.480   | 0.311     | 2e-05            | NA                    | Hypermethylated in FP vs FN |
| cg26015134 | 0.673   | 0.403   | 0.270     | 2e-05            | NA                    | Hypermethylated in FP vs FN |
| cg08677210 | 0.698   | 0.418   | 0.279     | 2e-05            | NA                    | Hypermethylated in FP vs FN |
| cg22644320 | 0.692   | 0.354   | 0.338     | 2e-05            | NA                    | Hypermethylated in FP vs FN |
| cg16764781 | 0.690   | 0.434   | 0.256     | 2e-05            | TP63                  | Hypermethylated in FP vs FN |
| cg23686214 | 0.763   | 0.477   | 0.286     | 2e-05            | NA                    | Hypermethylated in FP vs FN |
| cg21771891 | 0.548   | 0.265   | 0.283     | 2e-05            | HIST1H2AJ_HIST1H2BM   | Hypermethylated in FP vs FN |
| cg03253737 | 0.579   | 0.271   | 0.308     | 2e-05            | NA                    | Hypermethylated in FP vs FN |
| cg24684357 | 0.548   | 0.234   | 0.314     | 2e-05            | RIPK4                 | Hypermethylated in FP vs FN |
| cg03794862 | 0.704   | 0.421   | 0.283     | 2e-05            | NA                    | Hypermethylated in FP vs FN |
| cg01246622 | 0.548   | 0.288   | 0.260     | 2e-05            | NA                    | Hypermethylated in FP vs FN |
| cg02397571 | 0.688   | 0.404   | 0.285     | 2e-05            | NA                    | Hypermethylated in FP vs FN |
| cg08133584 | 0.637   | 0.322   | 0.315     | 2e-05            | C16orf11              | Hypermethylated in FP vs FN |
| cg13343687 | 0.534   | 0.238   | 0.297     | 2e-05            | NA                    | Hypermethylated in FP vs FN |
| cg03869225 | 0.719   | 0.458   | 0.261     | 2e-05            | NA                    | Hypermethylated in FP vs FN |
| cg22084515 | 0.758   | 0.469   | 0.289     | 2e-05            | NA                    | Hypermethylated in FP vs FN |
| cg08501292 | 0.650   | 0.335   | 0.315     | 2e-05            | TRIM38                | Hypermethylated in FP vs FN |
| cg09851545 | 0.633   | 0.323   | 0.310     | 2e-05            | NA                    | Hypermethylated in FP vs FN |
| cg08353973 | 0.665   | 0.391   | 0.275     | 2e-05            | NA                    | Hypermethylated in FP vs FN |
| cg25531836 | 0.661   | 0.269   | 0.393     | 2e-05            | NA                    | Hypermethylated in FP vs FN |
| cg04438395 | 0.736   | 0.438   | 0.298     | 2e-05            | NA                    | Hypermethylated in FP vs FN |

### Supplementary Table 7 (continued)

| Probe      | FP.mean | FN.mean | Mean.diff | Adjusted.P.value | Promoter.related.gene | Category                    |
|------------|---------|---------|-----------|------------------|-----------------------|-----------------------------|
| cg02270412 | 0.644   | 0.319   | 0.325     | 2e-05            | NA                    | Hypermethylated in FP vs FN |
| cg01129320 | 0.847   | 0.547   | 0.301     | 2e-05            | NA                    | Hypermethylated in FP vs FN |
| cg26288249 | 0.460   | 0.108   | 0.352     | 2e-05            | AKAP2                 | Hypermethylated in FP vs FN |
| cg08393041 | 0.839   | 0.534   | 0.305     | 2e-05            | NA                    | Hypermethylated in FP vs FN |
| cg06969287 | 0.576   | 0.213   | 0.363     | 2e-05            | NA                    | Hypermethylated in FP vs FN |
| cg00178551 | 0.670   | 0.420   | 0.251     | 2e-05            | NA                    | Hypermethylated in FP vs FN |
| cg01917069 | 0.696   | 0.306   | 0.390     | 2e-05            | NA                    | Hypermethylated in FP vs FN |
| cg26672959 | 0.635   | 0.350   | 0.285     | 2e-05            | NA                    | Hypermethylated in FP vs FN |
| cg12667939 | 0.755   | 0.391   | 0.364     | 2e-05            | NA                    | Hypermethylated in FP vs FN |
| cg02981992 | 0.522   | 0.230   | 0.292     | 2e-05            | COL19A1               | Hypermethylated in FP vs FN |
| cg26199857 | 0.655   | 0.290   | 0.365     | 2e-05            | NA                    | Hypermethylated in FP vs FN |
| cg02764093 | 0.761   | 0.438   | 0.323     | 2e-05            | NA                    | Hypermethylated in FP vs FN |
| cg05283646 | 0.932   | 0.619   | 0.312     | 2e-05            | NA                    | Hypermethylated in FP vs FN |
| cg23700125 | 0.640   | 0.290   | 0.350     | 2e-05            | FBXO43                | Hypermethylated in FP vs FN |
| cg21879102 | 0.761   | 0.402   | 0.358     | 2e-05            | NA                    | Hypermethylated in FP vs FN |
| cg04026354 | 0.570   | 0.277   | 0.293     | 2e-05            | NA                    | Hypermethylated in FP vs FN |
| cg09495643 | 0.711   | 0.350   | 0.361     | 2e-05            | SBNO2                 | Hypermethylated in FP vs FN |
| cg20651758 | 0.652   | 0.374   | 0.278     | 2e-05            | NA                    | Hypermethylated in FP vs FN |
| cg23164183 | 0.434   | 0.162   | 0.272     | 2e-05            | NA                    | Hypermethylated in FP vs FN |
| cg03739378 | 0.773   | 0.518   | 0.254     | 2e-05            | NA                    | Hypermethylated in FP vs FN |
| cg19203457 | 0.512   | 0.182   | 0.330     | 2e-05            | NA                    | Hypermethylated in FP vs FN |
| cg19579080 | 0.789   | 0.491   | 0.298     | 2e-05            | NA                    | Hypermethylated in FP vs FN |
| cg04320316 | 0.636   | 0.359   | 0.277     | 2e-05            | NA                    | Hypermethylated in FP vs FN |
| cg05387399 | 0.644   | 0.277   | 0.367     | 2e-05            | NA                    | Hypermethylated in FP vs FN |
| cg17824363 | 0.759   | 0.425   | 0.334     | 2e-05            | NA                    | Hypermethylated in FP vs FN |

### Supplementary Table 7 (continued)

| Probe      | FP.mean | FN.mean | Mean.diff | Adjusted.P.value | Promoter.related.gene | Category                    |
|------------|---------|---------|-----------|------------------|-----------------------|-----------------------------|
| cg00813746 | 0.468   | 0.124   | 0.344     | 2e-05            | NA                    | Hypermethylated in FP vs FN |
| cg23733845 | 0.732   | 0.481   | 0.251     | 2e-05            | NA                    | Hypermethylated in FP vs FN |
| cg16275295 | 0.423   | 0.155   | 0.268     | 2e-05            | NA                    | Hypermethylated in FP vs FN |
| cg18562663 | 0.460   | 0.144   | 0.317     | 2e-05            | BCL6                  | Hypermethylated in FP vs FN |
| cg04925956 | 0.840   | 0.582   | 0.258     | 2e-05            | NA                    | Hypermethylated in FP vs FN |
| cg14159342 | 0.740   | 0.474   | 0.266     | 2e-05            | NA                    | Hypermethylated in FP vs FN |
| cg15240102 | 0.806   | 0.546   | 0.259     | 2e-05            | NA                    | Hypermethylated in FP vs FN |
| cg18614779 | 0.416   | 0.162   | 0.254     | 2e-05            | SIGLEC6               | Hypermethylated in FP vs FN |
| cg00078221 | 0.726   | 0.397   | 0.329     | 2e-05            | NA                    | Hypermethylated in FP vs FN |
| cg00199059 | 0.696   | 0.429   | 0.266     | 2e-05            | NA                    | Hypermethylated in FP vs FN |
| cg04010586 | 0.755   | 0.490   | 0.265     | 2e-05            | NA                    | Hypermethylated in FP vs FN |
| cg14003978 | 0.725   | 0.448   | 0.278     | 2e-05            | NA                    | Hypermethylated in FP vs FN |
| cg07494300 | 0.698   | 0.379   | 0.319     | 2e-05            | NA                    | Hypermethylated in FP vs FN |
| cg15505287 | 0.500   | 0.235   | 0.266     | 2e-05            | NA                    | Hypermethylated in FP vs FN |
| cg25624887 | 0.812   | 0.558   | 0.254     | 2e-05            | NA                    | Hypermethylated in FP vs FN |
| cg22870661 | 0.766   | 0.489   | 0.277     | 2e-05            | NA                    | Hypermethylated in FP vs FN |
| cg17548844 | 0.636   | 0.336   | 0.301     | 2e-05            | NA                    | Hypermethylated in FP vs FN |
| cg18724581 | 0.556   | 0.221   | 0.335     | 2e-05            | NA                    | Hypermethylated in FP vs FN |
| cg06710927 | 0.766   | 0.427   | 0.340     | 2e-05            | NA                    | Hypermethylated in FP vs FN |
| cg11857997 | 0.662   | 0.264   | 0.398     | 2e-05            | NA                    | Hypermethylated in FP vs FN |
| cg08329754 | 0.784   | 0.463   | 0.321     | 2e-05            | NA                    | Hypermethylated in FP vs FN |
| cg25247520 | 0.621   | 0.313   | 0.308     | 2e-05            | MIR1204               | Hypermethylated in FP vs FN |
| cg25931491 | 0.903   | 0.609   | 0.294     | 2e-05            | NA                    | Hypermethylated in FP vs FN |
| cg22260478 | 0.615   | 0.323   | 0.291     | 2e-05            | CTGF                  | Hypermethylated in FP vs FN |
| cg02806675 | 0.678   | 0.417   | 0.261     | 2e-05            | NA                    | Hypermethylated in FP vs FN |

### Supplementary Table 7 (continued)

| Probe      | FP.mean | FN.mean | Mean.diff | Adjusted.P.value | Promoter.related.gene | Category                    |
|------------|---------|---------|-----------|------------------|-----------------------|-----------------------------|
| cg16709904 | 0.805   | 0.488   | 0.317     | 2e-05            | LOC732275             | Hypermethylated in FP vs FN |
| cg14421192 | 0.586   | 0.242   | 0.344     | 2e-05            | NA                    | Hypermethylated in FP vs FN |
| cg26457248 | 0.816   | 0.556   | 0.260     | 2e-05            | NA                    | Hypermethylated in FP vs FN |
| cg15150970 | 0.551   | 0.296   | 0.256     | 2e-05            | NA                    | Hypermethylated in FP vs FN |
| cg10594709 | 0.381   | 0.081   | 0.300     | 2e-05            | NA                    | Hypermethylated in FP vs FN |
| cg14434293 | 0.709   | 0.440   | 0.269     | 2e-05            | NA                    | Hypermethylated in FP vs FN |
| cg00171092 | 0.650   | 0.336   | 0.314     | 2e-05            | NA                    | Hypermethylated in FP vs FN |
| cg19939130 | 0.868   | 0.616   | 0.252     | 2e-05            | IFI16                 | Hypermethylated in FP vs FN |
| cg09474229 | 0.720   | 0.310   | 0.409     | 2e-05            | NA                    | Hypermethylated in FP vs FN |
| cg05592483 | 0.703   | 0.419   | 0.284     | 2e-05            | NA                    | Hypermethylated in FP vs FN |
| cg00148862 | 0.751   | 0.459   | 0.292     | 2e-05            | NA                    | Hypermethylated in FP vs FN |
| cg01685242 | 0.367   | 0.064   | 0.304     | 2e-05            | NA                    | Hypermethylated in FP vs FN |
| cg17440909 | 0.657   | 0.374   | 0.283     | 2e-05            | NA                    | Hypermethylated in FP vs FN |
| cg10785263 | 0.745   | 0.371   | 0.374     | 2e-05            | NA                    | Hypermethylated in FP vs FN |
| cg00013569 | 0.812   | 0.547   | 0.265     | 2e-05            | NA                    | Hypermethylated in FP vs FN |
| cg13656173 | 0.522   | 0.259   | 0.262     | 2e-05            | NA                    | Hypermethylated in FP vs FN |
| cg03117005 | 0.552   | 0.257   | 0.295     | 2e-05            | TAF4                  | Hypermethylated in FP vs FN |
| cg18448746 | 0.795   | 0.477   | 0.317     | 2e-05            | PROCA1                | Hypermethylated in FP vs FN |
| cg08985785 | 0.675   | 0.307   | 0.368     | 2e-05            | NA                    | Hypermethylated in FP vs FN |
| cg07984515 | 0.634   | 0.335   | 0.300     | 2e-05            | NA                    | Hypermethylated in FP vs FN |
| cg17429000 | 0.558   | 0.213   | 0.345     | 2e-05            | NA                    | Hypermethylated in FP vs FN |
| cg04558175 | 0.838   | 0.540   | 0.298     | 2e-05            | NA                    | Hypermethylated in FP vs FN |
| cg02711397 | 0.671   | 0.310   | 0.361     | 2e-05            | NA                    | Hypermethylated in FP vs FN |
| cg02089395 | 0.797   | 0.461   | 0.336     | 2e-05            | NA                    | Hypermethylated in FP vs FN |
| cg26372400 | 0.409   | 0.135   | 0.274     | 2e-05            | ACVRL1                | Hypermethylated in FP vs FN |

### Supplementary Table 7 (continued)

| Probe      | FP.mean | FN.mean | Mean.diff | Adjusted.P.value | Promoter.related.gene | Category                    |
|------------|---------|---------|-----------|------------------|-----------------------|-----------------------------|
| cg18536607 | 0.835   | 0.568   | 0.267     | 2e-05            | NA                    | Hypermethylated in FP vs FN |
| cg15814750 | 0.719   | 0.430   | 0.289     | 2e-05            | NA                    | Hypermethylated in FP vs FN |
| cg04776470 | 0.713   | 0.365   | 0.348     | 2e-05            | NA                    | Hypermethylated in FP vs FN |
| cg07271261 | 0.700   | 0.432   | 0.268     | 2e-05            | VGLL4                 | Hypermethylated in FP vs FN |
| cg14370448 | 0.724   | 0.416   | 0.308     | 2e-05            | TBX6                  | Hypermethylated in FP vs FN |
| cg14840612 | 0.566   | 0.279   | 0.288     | 2e-05            | NA                    | Hypermethylated in FP vs FN |
| cg13308080 | 0.411   | 0.108   | 0.303     | 2e-05            | NA                    | Hypermethylated in FP vs FN |
| cg08855449 | 0.862   | 0.475   | 0.387     | 2e-05            | ZIC1                  | Hypermethylated in FP vs FN |
| cg17064870 | 0.656   | 0.342   | 0.313     | 2e-05            | NA                    | Hypermethylated in FP vs FN |
| cg19014335 | 0.695   | 0.381   | 0.314     | 2e-05            | NA                    | Hypermethylated in FP vs FN |
| cg09606925 | 0.778   | 0.523   | 0.254     | 2e-05            | NA                    | Hypermethylated in FP vs FN |
| cg20495404 | 0.684   | 0.364   | 0.320     | 2e-05            | NA                    | Hypermethylated in FP vs FN |
| cg18085176 | 0.452   | 0.155   | 0.297     | 2e-05            | NA                    | Hypermethylated in FP vs FN |
| cg06225294 | 0.708   | 0.432   | 0.275     | 2e-05            | ZBTB20                | Hypermethylated in FP vs FN |
| cg21377489 | 0.533   | 0.206   | 0.327     | 2e-05            | NA                    | Hypermethylated in FP vs FN |
| cg00961616 | 0.791   | 0.508   | 0.283     | 2e-05            | NA                    | Hypermethylated in FP vs FN |
| cg25548986 | 0.539   | 0.211   | 0.327     | 2e-05            | NA                    | Hypermethylated in FP vs FN |
| cg21069005 | 0.810   | 0.524   | 0.287     | 2e-05            | NA                    | Hypermethylated in FP vs FN |
| cg09167291 | 0.840   | 0.587   | 0.253     | 2e-05            | NA                    | Hypermethylated in FP vs FN |
| cg20820876 | 0.798   | 0.530   | 0.267     | 2e-05            | NA                    | Hypermethylated in FP vs FN |
| cg18419175 | 0.629   | 0.312   | 0.317     | 2e-05            | NA                    | Hypermethylated in FP vs FN |
| cg11243283 | 0.830   | 0.549   | 0.281     | 2e-05            | NA                    | Hypermethylated in FP vs FN |
| cg08927145 | 0.680   | 0.329   | 0.351     | 2e-05            | NA                    | Hypermethylated in FP vs FN |
| cg18374914 | 0.551   | 0.260   | 0.291     | 2e-05            | NA                    | Hypermethylated in FP vs FN |
| cg06777815 | 0.877   | 0.609   | 0.268     | 2e-05            | NA                    | Hypermethylated in FP vs FN |

**Supplementary Table 7 (continued)**

| Probe      | FP.mean | FN.mean | Mean.diff | Adjusted.P.value | Promoter.related.gene | Category                    |
|------------|---------|---------|-----------|------------------|-----------------------|-----------------------------|
| cg08708961 | 0.688   | 0.398   | 0.290     | 2e-05            | NA                    | Hypermethylated in FP vs FN |
| cg27491887 | 0.609   | 0.285   | 0.324     | 2e-05            | NA                    | Hypermethylated in FP vs FN |
| cg25131544 | 0.737   | 0.393   | 0.344     | 2e-05            | NA                    | Hypermethylated in FP vs FN |
| cg09871057 | 0.573   | 0.302   | 0.271     | 2e-05            | NA                    | Hypermethylated in FP vs FN |
| cg13726459 | 0.705   | 0.430   | 0.275     | 2e-05            | HOXC4_HOXC6_HOXC5     | Hypermethylated in FP vs FN |
| cg22799963 | 0.787   | 0.441   | 0.346     | 2e-05            | NA                    | Hypermethylated in FP vs FN |
| cg25347526 | 0.579   | 0.274   | 0.305     | 2e-05            | NA                    | Hypermethylated in FP vs FN |
| cg03159396 | 0.666   | 0.334   | 0.331     | 2e-05            | NA                    | Hypermethylated in FP vs FN |
| cg23769143 | 0.762   | 0.500   | 0.262     | 2e-05            | TIMP4                 | Hypermethylated in FP vs FN |
| cg23790554 | 0.786   | 0.469   | 0.317     | 2e-05            | NA                    | Hypermethylated in FP vs FN |
| cg08949101 | 0.687   | 0.433   | 0.254     | 2e-05            | TCP10L                | Hypermethylated in FP vs FN |
| cg06288788 | 0.789   | 0.426   | 0.364     | 2e-05            | NA                    | Hypermethylated in FP vs FN |
| cg26883434 | 0.792   | 0.533   | 0.260     | 2e-05            | C5orf13               | Hypermethylated in FP vs FN |
| cg00579531 | 0.796   | 0.544   | 0.252     | 2e-05            | NA                    | Hypermethylated in FP vs FN |
| cg27277532 | 0.592   | 0.263   | 0.329     | 2e-05            | NA                    | Hypermethylated in FP vs FN |
| cg22488849 | 0.673   | 0.375   | 0.298     | 2e-05            | NA                    | Hypermethylated in FP vs FN |
| cg03517376 | 0.451   | 0.160   | 0.291     | 2e-05            | NA                    | Hypermethylated in FP vs FN |
| cg20128099 | 0.590   | 0.340   | 0.251     | 2e-05            | NA                    | Hypermethylated in FP vs FN |
| cg11997733 | 0.431   | 0.176   | 0.254     | 2e-05            | NA                    | Hypermethylated in FP vs FN |
| cg07414571 | 0.432   | 0.139   | 0.293     | 2e-05            | NA                    | Hypermethylated in FP vs FN |
| cg08714590 | 0.849   | 0.567   | 0.282     | 2e-05            | FZD1                  | Hypermethylated in FP vs FN |
| cg27005179 | 0.356   | 0.099   | 0.257     | 2e-05            | NA                    | Hypermethylated in FP vs FN |
| cg13359161 | 0.849   | 0.588   | 0.261     | 2e-05            | NA                    | Hypermethylated in FP vs FN |
| cg06040034 | 0.794   | 0.438   | 0.356     | 2e-05            | NA                    | Hypermethylated in FP vs FN |
| cg07006718 | 0.825   | 0.520   | 0.305     | 2e-05            | NA                    | Hypermethylated in FP vs FN |

### Supplementary Table 7 (continued)

| Probe      | FP.mean | FN.mean | Mean.diff | Adjusted.P.value | Promoter.related.gene | Category                    |
|------------|---------|---------|-----------|------------------|-----------------------|-----------------------------|
| cg10689404 | 0.665   | 0.311   | 0.355     | 3e-05            | NA                    | Hypermethylated in FP vs FN |
| cg07142797 | 0.682   | 0.236   | 0.446     | 3e-05            | NA                    | Hypermethylated in FP vs FN |
| cg13425335 | 0.501   | 0.193   | 0.308     | 3e-05            | NA                    | Hypermethylated in FP vs FN |
| cg17147526 | 0.670   | 0.348   | 0.322     | 3e-05            | NA                    | Hypermethylated in FP vs FN |
| cg21950107 | 0.634   | 0.380   | 0.255     | 3e-05            | NA                    | Hypermethylated in FP vs FN |
| cg11412466 | 0.718   | 0.357   | 0.361     | 3e-05            | NA                    | Hypermethylated in FP vs FN |
| cg03178838 | 0.736   | 0.376   | 0.360     | 3e-05            | SBNO2                 | Hypermethylated in FP vs FN |
| cg04012797 | 0.545   | 0.267   | 0.277     | 3e-05            | NA                    | Hypermethylated in FP vs FN |
| cg01274660 | 0.515   | 0.187   | 0.328     | 3e-05            | NA                    | Hypermethylated in FP vs FN |
| cg06962748 | 0.710   | 0.460   | 0.250     | 3e-05            | NA                    | Hypermethylated in FP vs FN |
| cg06504526 | 0.707   | 0.381   | 0.326     | 3e-05            | NA                    | Hypermethylated in FP vs FN |
| cg11293176 | 0.681   | 0.383   | 0.298     | 3e-05            | NA                    | Hypermethylated in FP vs FN |
| cg05678526 | 0.557   | 0.298   | 0.259     | 3e-05            | NA                    | Hypermethylated in FP vs FN |
| cg04378886 | 0.668   | 0.303   | 0.365     | 3e-05            | NA                    | Hypermethylated in FP vs FN |
| cg19789753 | 0.761   | 0.436   | 0.325     | 3e-05            | NA                    | Hypermethylated in FP vs FN |
| cg07252792 | 0.724   | 0.431   | 0.294     | 3e-05            | CCDC116               | Hypermethylated in FP vs FN |
| cg09001356 | 0.724   | 0.451   | 0.272     | 3e-05            | NA                    | Hypermethylated in FP vs FN |
| cg12096506 | 0.493   | 0.237   | 0.256     | 3e-05            | NA                    | Hypermethylated in FP vs FN |
| cg25902939 | 0.634   | 0.263   | 0.371     | 3e-05            | NA                    | Hypermethylated in FP vs FN |
| cg01097897 | 0.791   | 0.539   | 0.252     | 3e-05            | NA                    | Hypermethylated in FP vs FN |
| cg16641055 | 0.686   | 0.431   | 0.255     | 3e-05            | NA                    | Hypermethylated in FP vs FN |
| cg18404706 | 0.678   | 0.341   | 0.337     | 3e-05            | NA                    | Hypermethylated in FP vs FN |
| cg25780607 | 0.416   | 0.120   | 0.297     | 3e-05            | ARSI                  | Hypermethylated in FP vs FN |
| cg01797381 | 0.615   | 0.354   | 0.261     | 3e-05            | NA                    | Hypermethylated in FP vs FN |
| cg03257341 | 0.566   | 0.223   | 0.343     | 3e-05            | NA                    | Hypermethylated in FP vs FN |



### Supplementary Table 7 (continued)

| Probe      | FP.mean | FN.mean | Mean.diff | Adjusted.P.value | Promoter.related.gene | Category                    |
|------------|---------|---------|-----------|------------------|-----------------------|-----------------------------|
| cg24504349 | 0.635   | 0.375   | 0.260     | 3e-05            | NA                    | Hypermethylated in FP vs FN |
| cg08422497 | 0.808   | 0.535   | 0.274     | 3e-05            | NA                    | Hypermethylated in FP vs FN |
| cg25625968 | 0.593   | 0.337   | 0.257     | 3e-05            | NA                    | Hypermethylated in FP vs FN |
| cg25617328 | 0.574   | 0.279   | 0.295     | 3e-05            | NA                    | Hypermethylated in FP vs FN |
| cg03781931 | 0.663   | 0.342   | 0.320     | 3e-05            | ALX1                  | Hypermethylated in FP vs FN |
| cg11410682 | 0.517   | 0.230   | 0.287     | 3e-05            | PNMAL2                | Hypermethylated in FP vs FN |
| cg09395612 | 0.841   | 0.539   | 0.302     | 3e-05            | NA                    | Hypermethylated in FP vs FN |
| cg24126630 | 0.676   | 0.425   | 0.251     | 3e-05            | NA                    | Hypermethylated in FP vs FN |
| cg11969108 | 0.801   | 0.518   | 0.283     | 3e-05            | NA                    | Hypermethylated in FP vs FN |
| cg23564535 | 0.601   | 0.302   | 0.299     | 3e-05            | NA                    | Hypermethylated in FP vs FN |
| cg25807487 | 0.636   | 0.382   | 0.255     | 3e-05            | MRGPRF                | Hypermethylated in FP vs FN |
| cg09813610 | 0.500   | 0.243   | 0.256     | 3e-05            | NA                    | Hypermethylated in FP vs FN |
| cg00334821 | 0.598   | 0.279   | 0.318     | 3e-05            | NA                    | Hypermethylated in FP vs FN |
| cg08154066 | 0.819   | 0.535   | 0.284     | 3e-05            | NA                    | Hypermethylated in FP vs FN |
| cg12538674 | 0.749   | 0.441   | 0.308     | 3e-05            | NA                    | Hypermethylated in FP vs FN |
| cg15199622 | 0.734   | 0.366   | 0.368     | 3e-05            | NA                    | Hypermethylated in FP vs FN |
| cg16058975 | 0.817   | 0.531   | 0.285     | 3e-05            | NA                    | Hypermethylated in FP vs FN |
| cg20663219 | 0.709   | 0.453   | 0.256     | 3e-05            | NA                    | Hypermethylated in FP vs FN |
| cg24965356 | 0.774   | 0.509   | 0.266     | 3e-05            | NA                    | Hypermethylated in FP vs FN |
| cg20288588 | 0.841   | 0.514   | 0.328     | 3e-05            | NA                    | Hypermethylated in FP vs FN |
| cg12996903 | 0.493   | 0.183   | 0.311     | 3e-05            | NA                    | Hypermethylated in FP vs FN |
| cg01089249 | 0.684   | 0.363   | 0.322     | 3e-05            | NA                    | Hypermethylated in FP vs FN |
| cg02503117 | 0.605   | 0.294   | 0.311     | 3e-05            | NA                    | Hypermethylated in FP vs FN |
| cg01299332 | 0.755   | 0.497   | 0.257     | 3e-05            | NA                    | Hypermethylated in FP vs FN |
| cg02052895 | 0.461   | 0.127   | 0.334     | 3e-05            | NTF3                  | Hypermethylated in FP vs FN |

### Supplementary Table 7 (continued)

| Probe      | FP.mean | FN.mean | Mean.diff | Adjusted.P.value | Promoter.related.gene | Category                    |
|------------|---------|---------|-----------|------------------|-----------------------|-----------------------------|
| cg20918957 | 0.467   | 0.215   | 0.251     | 3e-05            | NA                    | Hypermethylated in FP vs FN |
| cg26731327 | 0.417   | 0.086   | 0.330     | 3e-05            | NA                    | Hypermethylated in FP vs FN |
| cg17413750 | 0.835   | 0.583   | 0.252     | 3e-05            | NA                    | Hypermethylated in FP vs FN |
| cg16355231 | 0.755   | 0.499   | 0.255     | 3e-05            | PEX10                 | Hypermethylated in FP vs FN |
| cg12853633 | 0.758   | 0.400   | 0.358     | 3e-05            | NA                    | Hypermethylated in FP vs FN |
| cg17502594 | 0.774   | 0.515   | 0.259     | 3e-05            | NA                    | Hypermethylated in FP vs FN |
| cg05576949 | 0.792   | 0.523   | 0.268     | 3e-05            | NA                    | Hypermethylated in FP vs FN |
| cg16966992 | 0.686   | 0.421   | 0.265     | 3e-05            | COCH                  | Hypermethylated in FP vs FN |
| cg05944137 | 0.727   | 0.403   | 0.323     | 3e-05            | NA                    | Hypermethylated in FP vs FN |
| cg12359697 | 0.540   | 0.182   | 0.358     | 3e-05            | NA                    | Hypermethylated in FP vs FN |
| cg09161043 | 0.601   | 0.345   | 0.256     | 3e-05            | NA                    | Hypermethylated in FP vs FN |
| cg09620689 | 0.764   | 0.437   | 0.328     | 3e-05            | NA                    | Hypermethylated in FP vs FN |
| cg17301052 | 0.696   | 0.385   | 0.311     | 3e-05            | NA                    | Hypermethylated in FP vs FN |
| cg08035234 | 0.774   | 0.435   | 0.339     | 3e-05            | NA                    | Hypermethylated in FP vs FN |
| cg01158415 | 0.722   | 0.434   | 0.288     | 3e-05            | NA                    | Hypermethylated in FP vs FN |
| cg16435910 | 0.769   | 0.452   | 0.317     | 3e-05            | NA                    | Hypermethylated in FP vs FN |
| cg13170728 | 0.675   | 0.367   | 0.307     | 3e-05            | NA                    | Hypermethylated in FP vs FN |
| cg10523820 | 0.418   | 0.166   | 0.253     | 3e-05            | ACTN3_ZDHHC24         | Hypermethylated in FP vs FN |
| cg16233311 | 0.601   | 0.350   | 0.251     | 3e-05            | SP9                   | Hypermethylated in FP vs FN |
| cg09667289 | 0.692   | 0.337   | 0.355     | 3e-05            | NA                    | Hypermethylated in FP vs FN |
| cg13385210 | 0.645   | 0.367   | 0.278     | 3e-05            | IGFBP4                | Hypermethylated in FP vs FN |
| cg21430685 | 0.618   | 0.279   | 0.339     | 3e-05            | NA                    | Hypermethylated in FP vs FN |
| cg26725838 | 0.577   | 0.220   | 0.357     | 3e-05            | NA                    | Hypermethylated in FP vs FN |
| cg18100702 | 0.595   | 0.314   | 0.281     | 3e-05            | NA                    | Hypermethylated in FP vs FN |
| cg04914894 | 0.661   | 0.365   | 0.296     | 3e-05            | NA                    | Hypermethylated in FP vs FN |

### Supplementary Table 7 (continued)

| Probe      | FP.mean | FN.mean | Mean.diff | Adjusted.P.value | Promoter.related.gene | Category                    |
|------------|---------|---------|-----------|------------------|-----------------------|-----------------------------|
| cg04621042 | 0.897   | 0.615   | 0.281     | 3e-05            | NA                    | Hypermethylated in FP vs FN |
| cg13683040 | 0.364   | 0.100   | 0.264     | 3e-05            | PAX5                  | Hypermethylated in FP vs FN |
| cg08201311 | 0.626   | 0.345   | 0.282     | 3e-05            | OBSL1                 | Hypermethylated in FP vs FN |
| cg16465939 | 0.692   | 0.395   | 0.297     | 3e-05            | NA                    | Hypermethylated in FP vs FN |
| cg05401670 | 0.908   | 0.637   | 0.271     | 3e-05            | NA                    | Hypermethylated in FP vs FN |
| cg08070771 | 0.751   | 0.407   | 0.344     | 3e-05            | ZIC4_ZIC1             | Hypermethylated in FP vs FN |
| cg05611565 | 0.827   | 0.551   | 0.277     | 3e-05            | NA                    | Hypermethylated in FP vs FN |
| cg19551055 | 0.709   | 0.439   | 0.270     | 3e-05            | NA                    | Hypermethylated in FP vs FN |
| cg04216235 | 0.683   | 0.384   | 0.299     | 3e-05            | NA                    | Hypermethylated in FP vs FN |
| cg04041283 | 0.588   | 0.317   | 0.271     | 3e-05            | NA                    | Hypermethylated in FP vs FN |
| cg06545367 | 0.659   | 0.387   | 0.272     | 3e-05            | LRRN3                 | Hypermethylated in FP vs FN |
| cg04977528 | 0.760   | 0.466   | 0.294     | 3e-05            | NA                    | Hypermethylated in FP vs FN |
| cg07501955 | 0.663   | 0.390   | 0.273     | 3e-05            | NA                    | Hypermethylated in FP vs FN |
| cg12744447 | 0.788   | 0.520   | 0.268     | 3e-05            | NA                    | Hypermethylated in FP vs FN |
| cg03603505 | 0.745   | 0.452   | 0.293     | 3e-05            | NA                    | Hypermethylated in FP vs FN |
| cg07291439 | 0.720   | 0.467   | 0.252     | 3e-05            | ZIC1                  | Hypermethylated in FP vs FN |
| cg11549094 | 0.471   | 0.170   | 0.301     | 3e-05            | SULF1                 | Hypermethylated in FP vs FN |
| cg05506581 | 0.637   | 0.369   | 0.267     | 3e-05            | NA                    | Hypermethylated in FP vs FN |
| cg17569743 | 0.725   | 0.415   | 0.310     | 3e-05            | NA                    | Hypermethylated in FP vs FN |
| cg20541870 | 0.654   | 0.401   | 0.253     | 3e-05            | NA                    | Hypermethylated in FP vs FN |
| cg10907148 | 0.615   | 0.278   | 0.337     | 3e-05            | NA                    | Hypermethylated in FP vs FN |
| cg06556244 | 0.653   | 0.390   | 0.263     | 3e-05            | NA                    | Hypermethylated in FP vs FN |
| cg08457169 | 0.679   | 0.362   | 0.317     | 3e-05            | NA                    | Hypermethylated in FP vs FN |
| cg02858997 | 0.735   | 0.472   | 0.263     | 3e-05            | GPR45                 | Hypermethylated in FP vs FN |
| cg20406460 | 0.730   | 0.405   | 0.325     | 3e-05            | NA                    | Hypermethylated in FP vs FN |

### Supplementary Table 7 (continued)

| Probe      | FP.mean | FN.mean | Mean.diff | Adjusted.P.value | Promoter.related.gene | Category                    |
|------------|---------|---------|-----------|------------------|-----------------------|-----------------------------|
| cg15001618 | 0.788   | 0.516   | 0.272     | 3e-05            | NA                    | Hypermethylated in FP vs FN |
| cg20237820 | 0.504   | 0.230   | 0.274     | 3e-05            | NA                    | Hypermethylated in FP vs FN |
| cg18558767 | 0.637   | 0.335   | 0.301     | 3e-05            | MIR1284               | Hypermethylated in FP vs FN |
| cg02021641 | 0.792   | 0.539   | 0.253     | 3e-05            | NA                    | Hypermethylated in FP vs FN |
| cg11987231 | 0.572   | 0.254   | 0.318     | 3e-05            | TMEM61                | Hypermethylated in FP vs FN |
| cg19593009 | 0.664   | 0.405   | 0.259     | 3e-05            | NA                    | Hypermethylated in FP vs FN |
| cg04506114 | 0.772   | 0.490   | 0.282     | 3e-05            | NA                    | Hypermethylated in FP vs FN |
| cg12455309 | 0.777   | 0.526   | 0.251     | 3e-05            | NA                    | Hypermethylated in FP vs FN |
| cg01668279 | 0.590   | 0.336   | 0.253     | 3e-05            | MIR483                | Hypermethylated in FP vs FN |
| cg27166381 | 0.472   | 0.148   | 0.324     | 3e-05            | NA                    | Hypermethylated in FP vs FN |
| cg12603369 | 0.819   | 0.567   | 0.252     | 3e-05            | NA                    | Hypermethylated in FP vs FN |
| cg17088073 | 0.559   | 0.198   | 0.362     | 3e-05            | NA                    | Hypermethylated in FP vs FN |
| cg05060704 | 0.456   | 0.204   | 0.252     | 3e-05            | NA                    | Hypermethylated in FP vs FN |
| cg11035271 | 0.694   | 0.438   | 0.256     | 3e-05            | NA                    | Hypermethylated in FP vs FN |
| cg24080008 | 0.794   | 0.452   | 0.342     | 3e-05            | NA                    | Hypermethylated in FP vs FN |
| cg13483916 | 0.455   | 0.114   | 0.341     | 3e-05            | NA                    | Hypermethylated in FP vs FN |
| cg06367117 | 0.493   | 0.190   | 0.303     | 3e-05            | ALDOC                 | Hypermethylated in FP vs FN |
| cg23916205 | 0.754   | 0.460   | 0.295     | 3e-05            | NA                    | Hypermethylated in FP vs FN |
| cg12691534 | 0.493   | 0.185   | 0.308     | 3e-05            | NA                    | Hypermethylated in FP vs FN |
| cg25086948 | 0.817   | 0.557   | 0.260     | 3e-05            | NA                    | Hypermethylated in FP vs FN |
| cg02390319 | 0.377   | 0.073   | 0.304     | 4e-05            | NA                    | Hypermethylated in FP vs FN |
| cg16659284 | 0.570   | 0.264   | 0.306     | 4e-05            | NA                    | Hypermethylated in FP vs FN |
| cg14258329 | 0.776   | 0.515   | 0.261     | 4e-05            | NA                    | Hypermethylated in FP vs FN |
| cg24750887 | 0.724   | 0.408   | 0.316     | 4e-05            | NA                    | Hypermethylated in FP vs FN |
| cg24682512 | 0.776   | 0.447   | 0.329     | 4e-05            | NA                    | Hypermethylated in FP vs FN |

### Supplementary Table 7 (continued)

| Probe      | FP.mean | FN.mean | Mean.diff | Adjusted.P.value | Promoter.related.gene | Category                    |
|------------|---------|---------|-----------|------------------|-----------------------|-----------------------------|
| cg26439963 | 0.726   | 0.296   | 0.430     | 4e-05            | NA                    | Hypermethylated in FP vs FN |
| cg22514682 | 0.596   | 0.289   | 0.308     | 4e-05            | NA                    | Hypermethylated in FP vs FN |
| cg26286839 | 0.828   | 0.497   | 0.331     | 4e-05            | NA                    | Hypermethylated in FP vs FN |
| cg04310802 | 0.871   | 0.604   | 0.267     | 4e-05            | NA                    | Hypermethylated in FP vs FN |
| cg07691306 | 0.795   | 0.538   | 0.257     | 4e-05            | NA                    | Hypermethylated in FP vs FN |
| cg18971175 | 0.647   | 0.305   | 0.342     | 4e-05            | NA                    | Hypermethylated in FP vs FN |
| cg16228323 | 0.765   | 0.368   | 0.397     | 4e-05            | NA                    | Hypermethylated in FP vs FN |
| cg02370232 | 0.674   | 0.354   | 0.320     | 4e-05            | NA                    | Hypermethylated in FP vs FN |
| cg00533182 | 0.742   | 0.466   | 0.277     | 4e-05            | NA                    | Hypermethylated in FP vs FN |
| cg14451791 | 0.753   | 0.476   | 0.278     | 4e-05            | NA                    | Hypermethylated in FP vs FN |
| cg26800771 | 0.745   | 0.397   | 0.347     | 4e-05            | NA                    | Hypermethylated in FP vs FN |
| cg17363943 | 0.770   | 0.505   | 0.265     | 4e-05            | NA                    | Hypermethylated in FP vs FN |
| cg09908110 | 0.811   | 0.450   | 0.361     | 4e-05            | NA                    | Hypermethylated in FP vs FN |
| cg07264666 | 0.807   | 0.511   | 0.296     | 4e-05            | NFAM1                 | Hypermethylated in FP vs FN |
| cg03611868 | 0.786   | 0.413   | 0.373     | 4e-05            | NA                    | Hypermethylated in FP vs FN |
| cg17566325 | 0.601   | 0.307   | 0.295     | 4e-05            | NA                    | Hypermethylated in FP vs FN |
| cg07180883 | 0.730   | 0.396   | 0.333     | 4e-05            | NA                    | Hypermethylated in FP vs FN |
| cg13344095 | 0.829   | 0.436   | 0.393     | 4e-05            | NA                    | Hypermethylated in FP vs FN |
| cg24686610 | 0.692   | 0.354   | 0.338     | 4e-05            | ZIC4_ZIC1             | Hypermethylated in FP vs FN |
| cg01915791 | 0.714   | 0.390   | 0.324     | 4e-05            | NA                    | Hypermethylated in FP vs FN |
| cg08417857 | 0.781   | 0.519   | 0.262     | 4e-05            | NA                    | Hypermethylated in FP vs FN |
| cg00475820 | 0.460   | 0.197   | 0.262     | 4e-05            | NA                    | Hypermethylated in FP vs FN |
| cg09998861 | 0.629   | 0.319   | 0.310     | 4e-05            | NA                    | Hypermethylated in FP vs FN |
| cg13204236 | 0.541   | 0.289   | 0.252     | 4e-05            | NA                    | Hypermethylated in FP vs FN |
| cg17767057 | 0.774   | 0.492   | 0.282     | 4e-05            | NA                    | Hypermethylated in FP vs FN |

### Supplementary Table 7 (continued)

| Probe      | FP.mean | FN.mean | Mean.diff | Adjusted.P.value | Promoter.related.gene | Category                    |
|------------|---------|---------|-----------|------------------|-----------------------|-----------------------------|
| cg15907473 | 0.589   | 0.317   | 0.273     | 4e-05            | GPR180                | Hypermethylated in FP vs FN |
| cg14301932 | 0.533   | 0.173   | 0.360     | 4e-05            | NA                    | Hypermethylated in FP vs FN |
| cg02705758 | 0.714   | 0.416   | 0.297     | 4e-05            | NA                    | Hypermethylated in FP vs FN |
| cg26228577 | 0.535   | 0.229   | 0.306     | 4e-05            | NA                    | Hypermethylated in FP vs FN |
| cg08797704 | 0.518   | 0.252   | 0.266     | 4e-05            | NA                    | Hypermethylated in FP vs FN |
| cg06106883 | 0.678   | 0.426   | 0.252     | 4e-05            | NA                    | Hypermethylated in FP vs FN |
| cg04895246 | 0.731   | 0.474   | 0.257     | 4e-05            | NA                    | Hypermethylated in FP vs FN |
| cg09339219 | 0.509   | 0.231   | 0.278     | 4e-05            | FZD2                  | Hypermethylated in FP vs FN |
| cg04244970 | 0.810   | 0.549   | 0.261     | 4e-05            | SLAMF7                | Hypermethylated in FP vs FN |
| cg07506299 | 0.459   | 0.148   | 0.312     | 4e-05            | NA                    | Hypermethylated in FP vs FN |
| cg05992786 | 0.756   | 0.474   | 0.281     | 4e-05            | HOXC4                 | Hypermethylated in FP vs FN |
| cg01146320 | 0.479   | 0.214   | 0.265     | 4e-05            | OAF                   | Hypermethylated in FP vs FN |
| cg12182991 | 0.470   | 0.107   | 0.362     | 4e-05            | NA                    | Hypermethylated in FP vs FN |
| cg14905632 | 0.521   | 0.185   | 0.335     | 4e-05            | RAPGEFL1              | Hypermethylated in FP vs FN |
| cg10941185 | 0.501   | 0.198   | 0.302     | 4e-05            | NA                    | Hypermethylated in FP vs FN |
| cg27647667 | 0.858   | 0.606   | 0.252     | 4e-05            | NA                    | Hypermethylated in FP vs FN |
| cg06772580 | 0.596   | 0.340   | 0.257     | 4e-05            | NA                    | Hypermethylated in FP vs FN |
| cg12478370 | 0.703   | 0.427   | 0.276     | 4e-05            | NA                    | Hypermethylated in FP vs FN |
| cg04937184 | 0.515   | 0.239   | 0.276     | 4e-05            | BMP4                  | Hypermethylated in FP vs FN |
| cg07440958 | 0.827   | 0.571   | 0.256     | 4e-05            | CNR1                  | Hypermethylated in FP vs FN |
| cg03517776 | 0.672   | 0.343   | 0.329     | 4e-05            | NA                    | Hypermethylated in FP vs FN |
| cg04806447 | 0.525   | 0.251   | 0.274     | 4e-05            | NA                    | Hypermethylated in FP vs FN |
| cg09728333 | 0.574   | 0.257   | 0.317     | 4e-05            | NA                    | Hypermethylated in FP vs FN |
| cg23802451 | 0.657   | 0.398   | 0.259     | 4e-05            | NA                    | Hypermethylated in FP vs FN |
| cg14386808 | 0.856   | 0.579   | 0.278     | 4e-05            | NA                    | Hypermethylated in FP vs FN |

### Supplementary Table 7 (continued)

| Probe      | FP.mean | FN.mean | Mean.diff | Adjusted.P.value | Promoter.related.gene | Category                    |
|------------|---------|---------|-----------|------------------|-----------------------|-----------------------------|
| cg08969912 | 0.345   | 0.066   | 0.279     | 4e-05            | NA                    | Hypermethylated in FP vs FN |
| cg09938674 | 0.816   | 0.535   | 0.281     | 4e-05            | NA                    | Hypermethylated in FP vs FN |
| cg05986067 | 0.716   | 0.448   | 0.269     | 4e-05            | NA                    | Hypermethylated in FP vs FN |
| cg07123608 | 0.851   | 0.558   | 0.293     | 4e-05            | NA                    | Hypermethylated in FP vs FN |
| cg17610169 | 0.770   | 0.504   | 0.265     | 4e-05            | NA                    | Hypermethylated in FP vs FN |
| cg00612905 | 0.698   | 0.374   | 0.324     | 4e-05            | NA                    | Hypermethylated in FP vs FN |
| cg03435384 | 0.717   | 0.407   | 0.310     | 4e-05            | NA                    | Hypermethylated in FP vs FN |
| cg07847030 | 0.562   | 0.254   | 0.308     | 4e-05            | NA                    | Hypermethylated in FP vs FN |
| cg26736200 | 0.724   | 0.408   | 0.316     | 4e-05            | NA                    | Hypermethylated in FP vs FN |
| cg11452571 | 0.433   | 0.072   | 0.361     | 4e-05            | NA                    | Hypermethylated in FP vs FN |
| cg05259872 | 0.540   | 0.276   | 0.264     | 4e-05            | PALLD                 | Hypermethylated in FP vs FN |
| cg04810287 | 0.718   | 0.434   | 0.284     | 4e-05            | NNAT                  | Hypermethylated in FP vs FN |
| cg00842687 | 0.670   | 0.417   | 0.253     | 4e-05            | NA                    | Hypermethylated in FP vs FN |
| cg00314343 | 0.843   | 0.556   | 0.287     | 4e-05            | NA                    | Hypermethylated in FP vs FN |
| cg13782615 | 0.687   | 0.411   | 0.276     | 4e-05            | NA                    | Hypermethylated in FP vs FN |
| cg22641350 | 0.851   | 0.538   | 0.313     | 4e-05            | NA                    | Hypermethylated in FP vs FN |
| cg00102731 | 0.780   | 0.494   | 0.286     | 4e-05            | NA                    | Hypermethylated in FP vs FN |
| cg13537156 | 0.659   | 0.355   | 0.304     | 4e-05            | NA                    | Hypermethylated in FP vs FN |
| cg01636575 | 0.630   | 0.347   | 0.283     | 4e-05            | NA                    | Hypermethylated in FP vs FN |
| cg19430897 | 0.402   | 0.125   | 0.277     | 4e-05            | HIST1H2AB             | Hypermethylated in FP vs FN |
| cg19244562 | 0.715   | 0.421   | 0.294     | 4e-05            | NA                    | Hypermethylated in FP vs FN |
| cg13539372 | 0.722   | 0.463   | 0.259     | 4e-05            | NA                    | Hypermethylated in FP vs FN |
| cg13621679 | 0.541   | 0.176   | 0.365     | 4e-05            | NA                    | Hypermethylated in FP vs FN |
| cg01282074 | 0.401   | 0.142   | 0.259     | 4e-05            | NKX2-5                | Hypermethylated in FP vs FN |
| cg05179645 | 0.790   | 0.540   | 0.250     | 4e-05            | NA                    | Hypermethylated in FP vs FN |

### Supplementary Table 7 (continued)

| Probe      | FP.mean | FN.mean | Mean.diff | Adjusted.P.value | Promoter.related.gene | Category                    |
|------------|---------|---------|-----------|------------------|-----------------------|-----------------------------|
| cg02524236 | 0.672   | 0.374   | 0.298     | 4e-05            | NA                    | Hypermethylated in FP vs FN |
| cg01495363 | 0.738   | 0.480   | 0.258     | 4e-05            | LOC100287216          | Hypermethylated in FP vs FN |
| cg23189410 | 0.846   | 0.417   | 0.429     | 4e-05            | ZIC4_ZIC1             | Hypermethylated in FP vs FN |
| cg25080501 | 0.502   | 0.248   | 0.254     | 4e-05            | NA                    | Hypermethylated in FP vs FN |
| cg16852483 | 0.771   | 0.422   | 0.348     | 4e-05            | ITGBL1                | Hypermethylated in FP vs FN |
| cg07621385 | 0.797   | 0.537   | 0.260     | 4e-05            | NA                    | Hypermethylated in FP vs FN |
| cg26857315 | 0.746   | 0.396   | 0.351     | 4e-05            | NA                    | Hypermethylated in FP vs FN |
| cg05313949 | 0.749   | 0.473   | 0.277     | 4e-05            | NA                    | Hypermethylated in FP vs FN |
| cg05552874 | 0.731   | 0.478   | 0.253     | 4e-05            | NA                    | Hypermethylated in FP vs FN |
| cg27185976 | 0.736   | 0.476   | 0.260     | 4e-05            | NA                    | Hypermethylated in FP vs FN |
| cg18709349 | 0.508   | 0.191   | 0.317     | 4e-05            | PNMAL2                | Hypermethylated in FP vs FN |
| cg22601108 | 0.754   | 0.435   | 0.319     | 4e-05            | OR6K6                 | Hypermethylated in FP vs FN |
| cg01786048 | 0.708   | 0.425   | 0.283     | 4e-05            | NA                    | Hypermethylated in FP vs FN |
| cg18374181 | 0.651   | 0.299   | 0.352     | 4e-05            | NA                    | Hypermethylated in FP vs FN |
| cg25552317 | 0.772   | 0.495   | 0.276     | 4e-05            | NA                    | Hypermethylated in FP vs FN |
| cg25547361 | 0.430   | 0.147   | 0.283     | 4e-05            | NA                    | Hypermethylated in FP vs FN |
| cg08448479 | 0.791   | 0.516   | 0.275     | 4e-05            | NA                    | Hypermethylated in FP vs FN |
| cg19747911 | 0.820   | 0.524   | 0.296     | 4e-05            | NA                    | Hypermethylated in FP vs FN |
| cg12727398 | 0.635   | 0.266   | 0.369     | 4e-05            | NA                    | Hypermethylated in FP vs FN |
| cg07201996 | 0.716   | 0.461   | 0.255     | 4e-05            | NA                    | Hypermethylated in FP vs FN |
| cg19052164 | 0.827   | 0.530   | 0.296     | 4e-05            | NA                    | Hypermethylated in FP vs FN |
| cg03185144 | 0.711   | 0.454   | 0.257     | 4e-05            | NA                    | Hypermethylated in FP vs FN |
| cg27221424 | 0.698   | 0.417   | 0.281     | 4e-05            | TIMP3                 | Hypermethylated in FP vs FN |
| cg00814909 | 0.730   | 0.388   | 0.342     | 5e-05            | NA                    | Hypermethylated in FP vs FN |
| cg18032164 | 0.638   | 0.323   | 0.315     | 5e-05            | NA                    | Hypermethylated in FP vs FN |



### Supplementary Table 7 (continued)

| Probe      | FP.mean | FN.mean | Mean.diff | Adjusted.P.value | Promoter.related.gene | Category                    |
|------------|---------|---------|-----------|------------------|-----------------------|-----------------------------|
| cg12292205 | 0.776   | 0.525   | 0.251     | 5e-05            | NA                    | Hypermethylated in FP vs FN |
| cg14954582 | 0.669   | 0.361   | 0.309     | 5e-05            | NA                    | Hypermethylated in FP vs FN |
| cg10264687 | 0.546   | 0.199   | 0.348     | 5e-05            | NA                    | Hypermethylated in FP vs FN |
| cg17231347 | 0.750   | 0.433   | 0.317     | 5e-05            | NA                    | Hypermethylated in FP vs FN |
| cg01751245 | 0.732   | 0.400   | 0.331     | 5e-05            | SPRED2                | Hypermethylated in FP vs FN |
| cg09884146 | 0.686   | 0.330   | 0.356     | 5e-05            | SPRED2                | Hypermethylated in FP vs FN |
| cg11258494 | 0.686   | 0.436   | 0.250     | 5e-05            | NA                    | Hypermethylated in FP vs FN |
| cg08536999 | 0.762   | 0.505   | 0.257     | 5e-05            | NA                    | Hypermethylated in FP vs FN |
| cg04144394 | 0.532   | 0.250   | 0.282     | 5e-05            | NA                    | Hypermethylated in FP vs FN |
| cg10457440 | 0.655   | 0.395   | 0.261     | 5e-05            | NA                    | Hypermethylated in FP vs FN |
| cg16706905 | 0.713   | 0.461   | 0.253     | 5e-05            | NA                    | Hypermethylated in FP vs FN |
| cg18362448 | 0.692   | 0.391   | 0.301     | 5e-05            | NA                    | Hypermethylated in FP vs FN |
| cg14464551 | 0.756   | 0.403   | 0.353     | 5e-05            | NA                    | Hypermethylated in FP vs FN |
| cg06508783 | 0.392   | 0.121   | 0.272     | 5e-05            | NA                    | Hypermethylated in FP vs FN |
| cg04821248 | 0.781   | 0.504   | 0.277     | 5e-05            | NA                    | Hypermethylated in FP vs FN |
| cg17680823 | 0.756   | 0.436   | 0.320     | 5e-05            | NA                    | Hypermethylated in FP vs FN |
| cg08006672 | 0.761   | 0.466   | 0.295     | 5e-05            | NA                    | Hypermethylated in FP vs FN |
| cg17866778 | 0.713   | 0.345   | 0.368     | 5e-05            | NA                    | Hypermethylated in FP vs FN |
| cg08287791 | 0.827   | 0.499   | 0.328     | 5e-05            | NA                    | Hypermethylated in FP vs FN |
| cg10287321 | 0.620   | 0.361   | 0.259     | 5e-05            | NA                    | Hypermethylated in FP vs FN |
| cg03103218 | 0.830   | 0.503   | 0.327     | 5e-05            | NA                    | Hypermethylated in FP vs FN |
| cg03115444 | 0.753   | 0.460   | 0.294     | 5e-05            | NA                    | Hypermethylated in FP vs FN |
| cg00465970 | 0.781   | 0.458   | 0.323     | 5e-05            | NA                    | Hypermethylated in FP vs FN |
| cg04494562 | 0.539   | 0.232   | 0.307     | 5e-05            | NA                    | Hypermethylated in FP vs FN |
| cg22730140 | 0.604   | 0.252   | 0.352     | 5e-05            | NA                    | Hypermethylated in FP vs FN |

### Supplementary Table 7 (continued)

| Probe      | FP.mean | FN.mean | Mean.diff | Adjusted.P.value | Promoter.related.gene | Category                    |
|------------|---------|---------|-----------|------------------|-----------------------|-----------------------------|
| cg10837429 | 0.726   | 0.384   | 0.342     | 5e-05            | NA                    | Hypermethylated in FP vs FN |
| cg22221870 | 0.303   | 0.043   | 0.259     | 5e-05            | FAM3B                 | Hypermethylated in FP vs FN |
| cg06824013 | 0.484   | 0.208   | 0.276     | 5e-05            | NA                    | Hypermethylated in FP vs FN |
| cg24742614 | 0.564   | 0.292   | 0.272     | 5e-05            | NA                    | Hypermethylated in FP vs FN |
| cg10173186 | 0.660   | 0.320   | 0.340     | 5e-05            | TIMP4                 | Hypermethylated in FP vs FN |
| cg02697649 | 0.852   | 0.561   | 0.291     | 5e-05            | FZD7                  | Hypermethylated in FP vs FN |
| cg04352168 | 0.841   | 0.586   | 0.255     | 5e-05            | NA                    | Hypermethylated in FP vs FN |
| cg17534540 | 0.671   | 0.330   | 0.340     | 5e-05            | NA                    | Hypermethylated in FP vs FN |
| cg03076094 | 0.673   | 0.375   | 0.297     | 5e-05            | NA                    | Hypermethylated in FP vs FN |
| cg12520861 | 0.442   | 0.190   | 0.252     | 5e-05            | NA                    | Hypermethylated in FP vs FN |
| cg23912509 | 0.694   | 0.404   | 0.289     | 5e-05            | MIR135A2              | Hypermethylated in FP vs FN |
| cg19802649 | 0.705   | 0.394   | 0.311     | 5e-05            | NA                    | Hypermethylated in FP vs FN |
| cg11757040 | 0.699   | 0.437   | 0.262     | 5e-05            | NA                    | Hypermethylated in FP vs FN |
| cg25407528 | 0.789   | 0.536   | 0.253     | 5e-05            | NA                    | Hypermethylated in FP vs FN |
| cg25419506 | 0.382   | 0.095   | 0.287     | 5e-05            | EIF4EBP3              | Hypermethylated in FP vs FN |
| cg16264616 | 0.723   | 0.403   | 0.320     | 5e-05            | NA                    | Hypermethylated in FP vs FN |
| cg24105407 | 0.601   | 0.333   | 0.268     | 5e-05            | TAS1R1_NOL9           | Hypermethylated in FP vs FN |
| cg05638439 | 0.853   | 0.505   | 0.348     | 5e-05            | NA                    | Hypermethylated in FP vs FN |
| cg20822818 | 0.443   | 0.178   | 0.265     | 5e-05            | USP2                  | Hypermethylated in FP vs FN |
| cg03989749 | 0.775   | 0.496   | 0.279     | 5e-05            | NA                    | Hypermethylated in FP vs FN |
| cg24608144 | 0.663   | 0.378   | 0.285     | 5e-05            | NA                    | Hypermethylated in FP vs FN |
| cg09081997 | 0.520   | 0.259   | 0.261     | 5e-05            | NA                    | Hypermethylated in FP vs FN |
| cg02968918 | 0.636   | 0.325   | 0.310     | 5e-05            | NA                    | Hypermethylated in FP vs FN |
| cg05417332 | 0.692   | 0.435   | 0.257     | 5e-05            | TBX6                  | Hypermethylated in FP vs FN |
| cg02410200 | 0.498   | 0.161   | 0.337     | 5e-05            | NA                    | Hypermethylated in FP vs FN |

### Supplementary Table 7 (continued)

| Probe      | FP.mean | FN.mean | Mean.diff | Adjusted.P.value | Promoter.related.gene | Category                    |
|------------|---------|---------|-----------|------------------|-----------------------|-----------------------------|
| cg04771946 | 0.672   | 0.325   | 0.347     | 5e-05            | NA                    | Hypermethylated in FP vs FN |
| cg14668747 | 0.528   | 0.219   | 0.309     | 5e-05            | ALDOC                 | Hypermethylated in FP vs FN |
| cg17536603 | 0.539   | 0.186   | 0.354     | 5e-05            | NA                    | Hypermethylated in FP vs FN |
| cg14524724 | 0.785   | 0.530   | 0.255     | 5e-05            | NA                    | Hypermethylated in FP vs FN |
| cg20686551 | 0.506   | 0.246   | 0.260     | 5e-05            | EML1                  | Hypermethylated in FP vs FN |
| cg10451262 | 0.779   | 0.494   | 0.284     | 5e-05            | NA                    | Hypermethylated in FP vs FN |
| cg26791399 | 0.740   | 0.458   | 0.282     | 5e-05            | ZIC4                  | Hypermethylated in FP vs FN |
| cg23264776 | 0.808   | 0.485   | 0.322     | 5e-05            | NA                    | Hypermethylated in FP vs FN |
| cg13821914 | 0.743   | 0.491   | 0.253     | 5e-05            | NA                    | Hypermethylated in FP vs FN |
| cg23193209 | 0.803   | 0.543   | 0.261     | 5e-05            | NA                    | Hypermethylated in FP vs FN |
| cg18772376 | 0.581   | 0.317   | 0.265     | 5e-05            | NA                    | Hypermethylated in FP vs FN |
| cg08693490 | 0.555   | 0.275   | 0.280     | 5e-05            | NA                    | Hypermethylated in FP vs FN |
| cg23526973 | 0.548   | 0.141   | 0.407     | 5e-05            | NA                    | Hypermethylated in FP vs FN |
| cg00273359 | 0.719   | 0.448   | 0.271     | 5e-05            | NA                    | Hypermethylated in FP vs FN |
| cg09166410 | 0.591   | 0.337   | 0.255     | 5e-05            | NA                    | Hypermethylated in FP vs FN |
| cg18735451 | 0.721   | 0.432   | 0.288     | 5e-05            | NA                    | Hypermethylated in FP vs FN |
| cg00990690 | 0.708   | 0.453   | 0.255     | 5e-05            | NA                    | Hypermethylated in FP vs FN |
| cg14245947 | 0.394   | 0.132   | 0.262     | 5e-05            | PHPT1                 | Hypermethylated in FP vs FN |
| cg26525076 | 0.852   | 0.573   | 0.279     | 5e-05            | NA                    | Hypermethylated in FP vs FN |
| cg17524017 | 0.427   | 0.115   | 0.311     | 5e-05            | SULF1                 | Hypermethylated in FP vs FN |
| cg04920452 | 0.757   | 0.478   | 0.279     | 5e-05            | NA                    | Hypermethylated in FP vs FN |
| cg05210671 | 0.708   | 0.402   | 0.306     | 5e-05            | NA                    | Hypermethylated in FP vs FN |
| cg15233611 | 0.605   | 0.335   | 0.270     | 5e-05            | NA                    | Hypermethylated in FP vs FN |
| cg14202146 | 0.715   | 0.461   | 0.254     | 5e-05            | NA                    | Hypermethylated in FP vs FN |
| cg06733155 | 0.659   | 0.349   | 0.310     | 5e-05            | NA                    | Hypermethylated in FP vs FN |

### Supplementary Table 7 (continued)

| Probe      | FP.mean | FN.mean | Mean.diff | Adjusted.P.value | Promoter.related.gene | Category                    |
|------------|---------|---------|-----------|------------------|-----------------------|-----------------------------|
| cg24260156 | 0.687   | 0.422   | 0.265     | 5e-05            | NA                    | Hypermethylated in FP vs FN |
| cg09199014 | 0.636   | 0.349   | 0.287     | 5e-05            | NA                    | Hypermethylated in FP vs FN |
| cg08309529 | 0.579   | 0.260   | 0.320     | 6e-05            | NA                    | Hypermethylated in FP vs FN |
| cg11746156 | 0.811   | 0.559   | 0.252     | 6e-05            | NA                    | Hypermethylated in FP vs FN |
| cg02093692 | 0.616   | 0.339   | 0.277     | 6e-05            | NA                    | Hypermethylated in FP vs FN |
| cg14166485 | 0.754   | 0.441   | 0.313     | 6e-05            | NA                    | Hypermethylated in FP vs FN |
| cg21374672 | 0.660   | 0.396   | 0.265     | 6e-05            | NA                    | Hypermethylated in FP vs FN |
| cg13054613 | 0.773   | 0.511   | 0.261     | 6e-05            | NA                    | Hypermethylated in FP vs FN |
| cg15022387 | 0.488   | 0.181   | 0.306     | 6e-05            | NA                    | Hypermethylated in FP vs FN |
| cg17561417 | 0.472   | 0.183   | 0.289     | 6e-05            | FBLN2                 | Hypermethylated in FP vs FN |
| cg00183684 | 0.826   | 0.489   | 0.337     | 6e-05            | DDAH1                 | Hypermethylated in FP vs FN |
| cg19703240 | 0.636   | 0.377   | 0.259     | 6e-05            | NA                    | Hypermethylated in FP vs FN |
| cg18005901 | 0.355   | 0.097   | 0.258     | 6e-05            | NA                    | Hypermethylated in FP vs FN |
| cg25556035 | 0.705   | 0.423   | 0.282     | 6e-05            | NA                    | Hypermethylated in FP vs FN |
| cg26264232 | 0.657   | 0.273   | 0.384     | 6e-05            | NA                    | Hypermethylated in FP vs FN |
| cg12603632 | 0.657   | 0.341   | 0.316     | 6e-05            | NA                    | Hypermethylated in FP vs FN |
| cg21131711 | 0.716   | 0.463   | 0.252     | 6e-05            | NA                    | Hypermethylated in FP vs FN |
| cg25058482 | 0.640   | 0.377   | 0.263     | 6e-05            | TANK                  | Hypermethylated in FP vs FN |
| cg19576241 | 0.713   | 0.395   | 0.319     | 6e-05            | NA                    | Hypermethylated in FP vs FN |
| cg16235809 | 0.700   | 0.422   | 0.279     | 6e-05            | NA                    | Hypermethylated in FP vs FN |
| cg01128736 | 0.590   | 0.275   | 0.315     | 6e-05            | NA                    | Hypermethylated in FP vs FN |
| cg00008695 | 0.839   | 0.563   | 0.276     | 6e-05            | NA                    | Hypermethylated in FP vs FN |
| cg03287339 | 0.791   | 0.420   | 0.371     | 6e-05            | NA                    | Hypermethylated in FP vs FN |
| cg12769705 | 0.735   | 0.378   | 0.357     | 6e-05            | NA                    | Hypermethylated in FP vs FN |
| cg17611686 | 0.657   | 0.349   | 0.308     | 6e-05            | NA                    | Hypermethylated in FP vs FN |

### Supplementary Table 7 (continued)

| Probe      | FP.mean | FN.mean | Mean.diff | Adjusted.P.value | Promoter.related.gene | Category                    |
|------------|---------|---------|-----------|------------------|-----------------------|-----------------------------|
| cg21406786 | 0.654   | 0.399   | 0.256     | 6e-05            | NA                    | Hypermethylated in FP vs FN |
| cg05191919 | 0.701   | 0.428   | 0.273     | 6e-05            | NA                    | Hypermethylated in FP vs FN |
| cg00901982 | 0.707   | 0.442   | 0.266     | 6e-05            | NA                    | Hypermethylated in FP vs FN |
| cg02414889 | 0.714   | 0.459   | 0.255     | 6e-05            | NA                    | Hypermethylated in FP vs FN |
| cg15001131 | 0.796   | 0.493   | 0.303     | 6e-05            | NA                    | Hypermethylated in FP vs FN |
| cg05279806 | 0.907   | 0.657   | 0.250     | 6e-05            | NA                    | Hypermethylated in FP vs FN |
| cg01452169 | 0.493   | 0.238   | 0.255     | 6e-05            | NA                    | Hypermethylated in FP vs FN |
| cg01690062 | 0.428   | 0.164   | 0.264     | 6e-05            | NA                    | Hypermethylated in FP vs FN |
| cg21936959 | 0.750   | 0.480   | 0.270     | 6e-05            | MRGPRF                | Hypermethylated in FP vs FN |
| cg12730047 | 0.762   | 0.447   | 0.316     | 6e-05            | NA                    | Hypermethylated in FP vs FN |
| cg23672278 | 0.695   | 0.433   | 0.262     | 6e-05            | NA                    | Hypermethylated in FP vs FN |
| cg25801976 | 0.656   | 0.320   | 0.335     | 6e-05            | NA                    | Hypermethylated in FP vs FN |
| cg09158990 | 0.416   | 0.108   | 0.308     | 6e-05            | WNT1                  | Hypermethylated in FP vs FN |
| cg27032075 | 0.649   | 0.389   | 0.260     | 6e-05            | NA                    | Hypermethylated in FP vs FN |
| cg22077197 | 0.507   | 0.242   | 0.265     | 6e-05            | NA                    | Hypermethylated in FP vs FN |
| cg14905466 | 0.692   | 0.377   | 0.315     | 6e-05            | SGK1                  | Hypermethylated in FP vs FN |
| cg05082527 | 0.651   | 0.398   | 0.253     | 6e-05            | MIR130A               | Hypermethylated in FP vs FN |
| cg27321913 | 0.521   | 0.249   | 0.271     | 6e-05            | DEF6                  | Hypermethylated in FP vs FN |
| cg07151966 | 0.824   | 0.570   | 0.254     | 6e-05            | NA                    | Hypermethylated in FP vs FN |
| cg19392656 | 0.442   | 0.169   | 0.273     | 6e-05            | FBLN2                 | Hypermethylated in FP vs FN |
| cg14547509 | 0.576   | 0.315   | 0.261     | 6e-05            | NA                    | Hypermethylated in FP vs FN |
| cg17201135 | 0.782   | 0.510   | 0.272     | 6e-05            | NA                    | Hypermethylated in FP vs FN |
| cg16522491 | 0.594   | 0.326   | 0.267     | 6e-05            | NA                    | Hypermethylated in FP vs FN |
| cg04783210 | 0.598   | 0.343   | 0.256     | 6e-05            | NA                    | Hypermethylated in FP vs FN |
| cg27249422 | 0.484   | 0.211   | 0.273     | 6e-05            | DHX58                 | Hypermethylated in FP vs FN |

### Supplementary Table 7 (continued)

| Probe      | FP.mean | FN.mean | Mean.diff | Adjusted.P.value | Promoter.related.gene | Category                    |
|------------|---------|---------|-----------|------------------|-----------------------|-----------------------------|
| cg07536502 | 0.386   | 0.121   | 0.264     | 6e-05            | NA                    | Hypermethylated in FP vs FN |
| cg20071561 | 0.846   | 0.546   | 0.300     | 6e-05            | NA                    | Hypermethylated in FP vs FN |
| cg04473902 | 0.710   | 0.399   | 0.311     | 6e-05            | PLBD1                 | Hypermethylated in FP vs FN |
| cg18017926 | 0.605   | 0.247   | 0.358     | 6e-05            | NA                    | Hypermethylated in FP vs FN |
| cg24690231 | 0.491   | 0.202   | 0.289     | 7e-05            | NA                    | Hypermethylated in FP vs FN |
| cg16942223 | 0.778   | 0.430   | 0.349     | 7e-05            | NA                    | Hypermethylated in FP vs FN |
| cg25605102 | 0.810   | 0.512   | 0.298     | 7e-05            | NA                    | Hypermethylated in FP vs FN |
| cg25291653 | 0.595   | 0.311   | 0.284     | 7e-05            | NA                    | Hypermethylated in FP vs FN |
| cg21750179 | 0.759   | 0.505   | 0.254     | 7e-05            | NA                    | Hypermethylated in FP vs FN |
| cg14591123 | 0.733   | 0.346   | 0.387     | 7e-05            | NA                    | Hypermethylated in FP vs FN |
| cg20683445 | 0.770   | 0.516   | 0.254     | 7e-05            | NA                    | Hypermethylated in FP vs FN |
| cg16253976 | 0.697   | 0.435   | 0.261     | 7e-05            | NA                    | Hypermethylated in FP vs FN |
| cg19176828 | 0.639   | 0.322   | 0.317     | 7e-05            | NA                    | Hypermethylated in FP vs FN |
| cg13526642 | 0.613   | 0.343   | 0.270     | 7e-05            | NA                    | Hypermethylated in FP vs FN |
| cg02954194 | 0.721   | 0.439   | 0.282     | 7e-05            | NA                    | Hypermethylated in FP vs FN |
| cg19022814 | 0.718   | 0.380   | 0.338     | 7e-05            | NA                    | Hypermethylated in FP vs FN |
| cg02852791 | 0.766   | 0.392   | 0.374     | 7e-05            | NA                    | Hypermethylated in FP vs FN |
| cg02855740 | 0.737   | 0.439   | 0.297     | 7e-05            | NA                    | Hypermethylated in FP vs FN |
| cg02820514 | 0.706   | 0.365   | 0.341     | 7e-05            | ZIC4                  | Hypermethylated in FP vs FN |
| cg15682797 | 0.855   | 0.562   | 0.293     | 7e-05            | NA                    | Hypermethylated in FP vs FN |
| cg24376266 | 0.311   | 0.059   | 0.252     | 7e-05            | FAM3B                 | Hypermethylated in FP vs FN |
| cg11570511 | 0.485   | 0.188   | 0.297     | 7e-05            | NA                    | Hypermethylated in FP vs FN |
| cg18609783 | 0.667   | 0.393   | 0.274     | 7e-05            | SP9                   | Hypermethylated in FP vs FN |
| cg10107050 | 0.727   | 0.342   | 0.385     | 7e-05            | ZIC1                  | Hypermethylated in FP vs FN |
| cg06153893 | 0.609   | 0.273   | 0.336     | 7e-05            | NA                    | Hypermethylated in FP vs FN |

### Supplementary Table 7 (continued)

| Probe      | FP.mean | FN.mean | Mean.diff | Adjusted.P.value | Promoter.related.gene | Category                    |
|------------|---------|---------|-----------|------------------|-----------------------|-----------------------------|
| cg17484733 | 0.591   | 0.251   | 0.339     | 7e-05            | NA                    | Hypermethylated in FP vs FN |
| cg10842913 | 0.769   | 0.494   | 0.275     | 7e-05            | NA                    | Hypermethylated in FP vs FN |
| cg25157914 | 0.552   | 0.290   | 0.261     | 7e-05            | STAT6                 | Hypermethylated in FP vs FN |
| cg07429146 | 0.612   | 0.311   | 0.301     | 7e-05            | NA                    | Hypermethylated in FP vs FN |
| cg18150120 | 0.646   | 0.315   | 0.331     | 7e-05            | NA                    | Hypermethylated in FP vs FN |
| cg09155362 | 0.551   | 0.279   | 0.272     | 7e-05            | NA                    | Hypermethylated in FP vs FN |
| cg19881992 | 0.753   | 0.489   | 0.265     | 7e-05            | NA                    | Hypermethylated in FP vs FN |
| cg16038738 | 0.646   | 0.367   | 0.279     | 7e-05            | NA                    | Hypermethylated in FP vs FN |
| cg18851960 | 0.623   | 0.352   | 0.271     | 7e-05            | NA                    | Hypermethylated in FP vs FN |
| cg16844403 | 0.397   | 0.108   | 0.289     | 7e-05            | WNT1                  | Hypermethylated in FP vs FN |
| cg11751545 | 0.773   | 0.441   | 0.333     | 7e-05            | NA                    | Hypermethylated in FP vs FN |
| cg10794502 | 0.838   | 0.566   | 0.273     | 7e-05            | NA                    | Hypermethylated in FP vs FN |
| cg13092405 | 0.866   | 0.470   | 0.396     | 7e-05            | NA                    | Hypermethylated in FP vs FN |
| cg24579851 | 0.716   | 0.412   | 0.304     | 7e-05            | NA                    | Hypermethylated in FP vs FN |
| cg04548856 | 0.734   | 0.391   | 0.343     | 7e-05            | NA                    | Hypermethylated in FP vs FN |
| cg08857063 | 0.614   | 0.293   | 0.321     | 7e-05            | NA                    | Hypermethylated in FP vs FN |
| cg14372753 | 0.788   | 0.521   | 0.268     | 7e-05            | NA                    | Hypermethylated in FP vs FN |
| cg09682469 | 0.772   | 0.506   | 0.267     | 7e-05            | NA                    | Hypermethylated in FP vs FN |
| cg25624690 | 0.875   | 0.625   | 0.250     | 7e-05            | NA                    | Hypermethylated in FP vs FN |
| cg26473189 | 0.742   | 0.455   | 0.287     | 7e-05            | NA                    | Hypermethylated in FP vs FN |
| cg19391527 | 0.623   | 0.360   | 0.263     | 7e-05            | PNOC                  | Hypermethylated in FP vs FN |
| cg17484237 | 0.683   | 0.386   | 0.297     | 7e-05            | HAVCR2                | Hypermethylated in FP vs FN |
| cg08130572 | 0.710   | 0.431   | 0.278     | 7e-05            | FYN                   | Hypermethylated in FP vs FN |
| cg18764814 | 0.770   | 0.496   | 0.275     | 7e-05            | NA                    | Hypermethylated in FP vs FN |
| cg19688203 | 0.626   | 0.340   | 0.287     | 7e-05            | NA                    | Hypermethylated in FP vs FN |

### Supplementary Table 7 (continued)

| Probe      | FP.mean | FN.mean | Mean.diff | Adjusted.P.value | Promoter.related.gene | Category                    |
|------------|---------|---------|-----------|------------------|-----------------------|-----------------------------|
| cg23477460 | 0.751   | 0.437   | 0.315     | 7e-05            | NA                    | Hypermethylated in FP vs FN |
| cg18735810 | 0.647   | 0.313   | 0.334     | 7e-05            | NA                    | Hypermethylated in FP vs FN |
| cg19760241 | 0.546   | 0.220   | 0.327     | 7e-05            | NA                    | Hypermethylated in FP vs FN |
| cg08672225 | 0.667   | 0.410   | 0.257     | 7e-05            | NA                    | Hypermethylated in FP vs FN |
| cg21796528 | 0.557   | 0.264   | 0.293     | 7e-05            | NA                    | Hypermethylated in FP vs FN |
| cg19163058 | 0.883   | 0.615   | 0.268     | 7e-05            | NA                    | Hypermethylated in FP vs FN |
| cg16881676 | 0.615   | 0.339   | 0.276     | 7e-05            | NA                    | Hypermethylated in FP vs FN |
| cg24089935 | 0.339   | 0.081   | 0.258     | 7e-05            | NA                    | Hypermethylated in FP vs FN |
| cg20918393 | 0.555   | 0.240   | 0.315     | 7e-05            | NA                    | Hypermethylated in FP vs FN |
| cg09266602 | 0.555   | 0.280   | 0.275     | 7e-05            | NA                    | Hypermethylated in FP vs FN |
| cg26657382 | 0.596   | 0.290   | 0.306     | 7e-05            | NA                    | Hypermethylated in FP vs FN |
| cg06990142 | 0.874   | 0.577   | 0.297     | 7e-05            | NA                    | Hypermethylated in FP vs FN |
| cg08075452 | 0.698   | 0.431   | 0.267     | 8e-05            | NA                    | Hypermethylated in FP vs FN |
| cg12992686 | 0.815   | 0.555   | 0.260     | 8e-05            | NA                    | Hypermethylated in FP vs FN |
| cg07759247 | 0.628   | 0.295   | 0.333     | 8e-05            | NA                    | Hypermethylated in FP vs FN |
| cg10938221 | 0.778   | 0.512   | 0.266     | 8e-05            | NA                    | Hypermethylated in FP vs FN |
| cg15091747 | 0.869   | 0.582   | 0.287     | 8e-05            | NA                    | Hypermethylated in FP vs FN |
| cg08657671 | 0.701   | 0.399   | 0.302     | 8e-05            | NA                    | Hypermethylated in FP vs FN |
| cg22962982 | 0.697   | 0.344   | 0.353     | 8e-05            | NA                    | Hypermethylated in FP vs FN |
| cg12446543 | 0.669   | 0.398   | 0.271     | 8e-05            | NA                    | Hypermethylated in FP vs FN |
| cg07601542 | 0.760   | 0.468   | 0.292     | 8e-05            | OLIG2                 | Hypermethylated in FP vs FN |
| cg03231163 | 0.733   | 0.373   | 0.361     | 8e-05            | NA                    | Hypermethylated in FP vs FN |
| cg16821992 | 0.465   | 0.157   | 0.308     | 8e-05            | NA                    | Hypermethylated in FP vs FN |
| cg20810222 | 0.584   | 0.324   | 0.260     | 8e-05            | NA                    | Hypermethylated in FP vs FN |
| cg13023014 | 0.609   | 0.312   | 0.296     | 8e-05            | NA                    | Hypermethylated in FP vs FN |



### Supplementary Table 7 (continued)

| Probe      | FP.mean | FN.mean | Mean.diff | Adjusted.P.value | Promoter.related.gene | Category                    |
|------------|---------|---------|-----------|------------------|-----------------------|-----------------------------|
| cg27312979 | 0.759   | 0.470   | 0.289     | 8e-05            | NA                    | Hypermethylated in FP vs FN |
| cg13031251 | 0.672   | 0.320   | 0.352     | 8e-05            | NA                    | Hypermethylated in FP vs FN |
| cg02311193 | 0.805   | 0.510   | 0.294     | 8e-05            | NA                    | Hypermethylated in FP vs FN |
| cg14339599 | 0.482   | 0.186   | 0.296     | 8e-05            | NA                    | Hypermethylated in FP vs FN |
| cg00335219 | 0.618   | 0.337   | 0.281     | 8e-05            | NA                    | Hypermethylated in FP vs FN |
| cg17033854 | 0.619   | 0.334   | 0.285     | 8e-05            | NA                    | Hypermethylated in FP vs FN |
| cg08558967 | 0.808   | 0.545   | 0.263     | 8e-05            | NA                    | Hypermethylated in FP vs FN |
| cg23750361 | 0.690   | 0.435   | 0.256     | 8e-05            | NA                    | Hypermethylated in FP vs FN |
| cg13496862 | 0.737   | 0.479   | 0.258     | 8e-05            | NA                    | Hypermethylated in FP vs FN |
| cg22352152 | 0.551   | 0.295   | 0.256     | 8e-05            | NA                    | Hypermethylated in FP vs FN |
| cg15531433 | 0.752   | 0.485   | 0.267     | 8e-05            | NA                    | Hypermethylated in FP vs FN |
| cg25789721 | 0.470   | 0.214   | 0.256     | 8e-05            | NA                    | Hypermethylated in FP vs FN |
| cg05261893 | 0.755   | 0.487   | 0.268     | 8e-05            | NA                    | Hypermethylated in FP vs FN |
| cg18127003 | 0.929   | 0.644   | 0.285     | 8e-05            | NA                    | Hypermethylated in FP vs FN |
| cg17051318 | 0.861   | 0.609   | 0.251     | 8e-05            | NA                    | Hypermethylated in FP vs FN |
| cg08038033 | 0.628   | 0.331   | 0.297     | 8e-05            | NA                    | Hypermethylated in FP vs FN |
| cg04687515 | 0.875   | 0.602   | 0.273     | 8e-05            | NA                    | Hypermethylated in FP vs FN |
| cg07005067 | 0.641   | 0.368   | 0.273     | 8e-05            | NA                    | Hypermethylated in FP vs FN |
| cg21774338 | 0.736   | 0.441   | 0.295     | 8e-05            | NA                    | Hypermethylated in FP vs FN |
| cg04166812 | 0.517   | 0.207   | 0.310     | 8e-05            | NA                    | Hypermethylated in FP vs FN |
| cg09187413 | 0.807   | 0.540   | 0.267     | 8e-05            | NA                    | Hypermethylated in FP vs FN |
| cg17443007 | 0.771   | 0.456   | 0.315     | 8e-05            | NA                    | Hypermethylated in FP vs FN |
| cg17485838 | 0.808   | 0.459   | 0.349     | 8e-05            | NA                    | Hypermethylated in FP vs FN |
| cg07810469 | 0.667   | 0.403   | 0.264     | 8e-05            | NA                    | Hypermethylated in FP vs FN |
| cg25567805 | 0.813   | 0.512   | 0.301     | 8e-05            | NA                    | Hypermethylated in FP vs FN |

### Supplementary Table 7 (continued)

| Probe      | FP.mean | FN.mean | Mean.diff | Adjusted.P.value | Promoter.related.gene | Category                    |
|------------|---------|---------|-----------|------------------|-----------------------|-----------------------------|
| cg13009869 | 0.739   | 0.467   | 0.273     | 8e-05            | NA                    | Hypermethylated in FP vs FN |
| cg17024452 | 0.418   | 0.145   | 0.273     | 8e-05            | NA                    | Hypermethylated in FP vs FN |
| cg13789015 | 0.545   | 0.289   | 0.255     | 8e-05            | NCRNA00094            | Hypermethylated in FP vs FN |
| cg23824183 | 0.699   | 0.419   | 0.280     | 8e-05            | NA                    | Hypermethylated in FP vs FN |
| cg23796755 | 0.814   | 0.543   | 0.271     | 8e-05            | NA                    | Hypermethylated in FP vs FN |
| cg15934368 | 0.780   | 0.518   | 0.262     | 8e-05            | NA                    | Hypermethylated in FP vs FN |
| cg07171527 | 0.675   | 0.348   | 0.327     | 8e-05            | NA                    | Hypermethylated in FP vs FN |
| cg05747390 | 0.721   | 0.464   | 0.257     | 8e-05            | NA                    | Hypermethylated in FP vs FN |
| cg26233084 | 0.770   | 0.516   | 0.255     | 8e-05            | NA                    | Hypermethylated in FP vs FN |
| cg17372806 | 0.665   | 0.412   | 0.252     | 8e-05            | RTN3                  | Hypermethylated in FP vs FN |
| cg17052926 | 0.442   | 0.137   | 0.305     | 8e-05            | C7orf20               | Hypermethylated in FP vs FN |
| cg00224471 | 0.628   | 0.317   | 0.310     | 9e-05            | NA                    | Hypermethylated in FP vs FN |
| cg00005740 | 0.616   | 0.313   | 0.303     | 9e-05            | NA                    | Hypermethylated in FP vs FN |
| cg09904140 | 0.753   | 0.493   | 0.260     | 9e-05            | WFDC1                 | Hypermethylated in FP vs FN |
| cg20714110 | 0.562   | 0.214   | 0.348     | 9e-05            | NA                    | Hypermethylated in FP vs FN |
| cg12039970 | 0.748   | 0.447   | 0.302     | 9e-05            | NA                    | Hypermethylated in FP vs FN |
| cg17649293 | 0.623   | 0.296   | 0.327     | 9e-05            | NA                    | Hypermethylated in FP vs FN |
| cg04050463 | 0.753   | 0.467   | 0.286     | 9e-05            | NA                    | Hypermethylated in FP vs FN |
| cg25423573 | 0.477   | 0.216   | 0.260     | 9e-05            | NA                    | Hypermethylated in FP vs FN |
| cg01295782 | 0.792   | 0.536   | 0.256     | 9e-05            | NA                    | Hypermethylated in FP vs FN |
| cg27092248 | 0.641   | 0.348   | 0.293     | 9e-05            | HRH1                  | Hypermethylated in FP vs FN |
| cg03756778 | 0.713   | 0.440   | 0.273     | 9e-05            | NA                    | Hypermethylated in FP vs FN |
| cg00299767 | 0.559   | 0.294   | 0.265     | 9e-05            | NA                    | Hypermethylated in FP vs FN |
| cg01896761 | 0.483   | 0.153   | 0.330     | 9e-05            | FBLN2                 | Hypermethylated in FP vs FN |
| cg15054725 | 0.779   | 0.401   | 0.378     | 9e-05            | NA                    | Hypermethylated in FP vs FN |

### Supplementary Table 7 (continued)

| Probe      | FP.mean | FN.mean | Mean.diff | Adjusted.P.value | Promoter.related.gene | Category                    |
|------------|---------|---------|-----------|------------------|-----------------------|-----------------------------|
| cg22132982 | 0.652   | 0.372   | 0.280     | 9e-05            | NA                    | Hypermethylated in FP vs FN |
| cg03720195 | 0.584   | 0.327   | 0.258     | 9e-05            | NA                    | Hypermethylated in FP vs FN |
| cg11847222 | 0.724   | 0.413   | 0.312     | 9e-05            | NA                    | Hypermethylated in FP vs FN |
| cg02931729 | 0.804   | 0.513   | 0.291     | 9e-05            | NA                    | Hypermethylated in FP vs FN |
| cg16512661 | 0.719   | 0.434   | 0.285     | 9e-05            | NA                    | Hypermethylated in FP vs FN |
| cg05813673 | 0.649   | 0.363   | 0.287     | 9e-05            | NA                    | Hypermethylated in FP vs FN |
| cg13716566 | 0.706   | 0.434   | 0.272     | 9e-05            | NA                    | Hypermethylated in FP vs FN |
| cg00468228 | 0.551   | 0.271   | 0.280     | 9e-05            | NA                    | Hypermethylated in FP vs FN |
| cg12655190 | 0.717   | 0.329   | 0.389     | 9e-05            | NA                    | Hypermethylated in FP vs FN |
| cg02051616 | 0.681   | 0.316   | 0.365     | 9e-05            | NA                    | Hypermethylated in FP vs FN |
| cg20693607 | 0.634   | 0.307   | 0.327     | 9e-05            | NA                    | Hypermethylated in FP vs FN |
| cg27637617 | 0.582   | 0.324   | 0.258     | 9e-05            | NA                    | Hypermethylated in FP vs FN |
| cg25008444 | 0.644   | 0.382   | 0.261     | 9e-05            | PIK3R1                | Hypermethylated in FP vs FN |
| cg00992802 | 0.794   | 0.534   | 0.260     | 9e-05            | NA                    | Hypermethylated in FP vs FN |
| cg14488390 | 0.616   | 0.303   | 0.313     | 9e-05            | NA                    | Hypermethylated in FP vs FN |
| cg16238993 | 0.728   | 0.351   | 0.376     | 9e-05            | SBNO2                 | Hypermethylated in FP vs FN |
| cg14924046 | 0.745   | 0.431   | 0.314     | 9e-05            | NA                    | Hypermethylated in FP vs FN |
| cg02791973 | 0.758   | 0.364   | 0.393     | 9e-05            | SBNO2                 | Hypermethylated in FP vs FN |
| cg12965599 | 0.734   | 0.417   | 0.316     | 9e-05            | ZIC1                  | Hypermethylated in FP vs FN |
| cg07557639 | 0.682   | 0.373   | 0.309     | 9e-05            | NA                    | Hypermethylated in FP vs FN |
| cg09689895 | 0.766   | 0.512   | 0.255     | 9e-05            | NA                    | Hypermethylated in FP vs FN |
| cg01956614 | 0.652   | 0.396   | 0.255     | 9e-05            | NA                    | Hypermethylated in FP vs FN |
| cg19821361 | 0.632   | 0.325   | 0.306     | 9e-05            | KRTAP10-6             | Hypermethylated in FP vs FN |
| cg01597387 | 0.689   | 0.379   | 0.309     | 9e-05            | DHRS4L2               | Hypermethylated in FP vs FN |
| cg25767504 | 0.679   | 0.279   | 0.401     | 9e-05            | NA                    | Hypermethylated in FP vs FN |

### Supplementary Table 7 (continued)

| Probe      | FP.mean | FN.mean | Mean.diff | Adjusted.P.value | Promoter.related.gene | Category                    |
|------------|---------|---------|-----------|------------------|-----------------------|-----------------------------|
| cg07405810 | 0.497   | 0.220   | 0.276     | 9e-05            | NA                    | Hypermethylated in FP vs FN |
| cg23885932 | 0.655   | 0.336   | 0.320     | 9e-05            | SBNO2                 | Hypermethylated in FP vs FN |
| cg13257436 | 0.674   | 0.367   | 0.307     | 9e-05            | NA                    | Hypermethylated in FP vs FN |
| cg08008475 | 0.671   | 0.388   | 0.283     | 9e-05            | NA                    | Hypermethylated in FP vs FN |
| cg08324612 | 0.710   | 0.435   | 0.275     | 9e-05            | NA                    | Hypermethylated in FP vs FN |
| cg26425305 | 0.631   | 0.366   | 0.265     | 1e-04            | NA                    | Hypermethylated in FP vs FN |
| cg07171687 | 0.605   | 0.354   | 0.251     | 1e-04            | NA                    | Hypermethylated in FP vs FN |
| cg03635766 | 0.624   | 0.356   | 0.268     | 1e-04            | NA                    | Hypermethylated in FP vs FN |
| cg25221774 | 0.566   | 0.298   | 0.269     | 1e-04            | NA                    | Hypermethylated in FP vs FN |
| cg01835873 | 0.397   | 0.105   | 0.292     | 1e-04            | RBMS3                 | Hypermethylated in FP vs FN |
| cg15236866 | 0.652   | 0.368   | 0.284     | 1e-04            | DLX1                  | Hypermethylated in FP vs FN |
| cg25251459 | 0.764   | 0.483   | 0.281     | 1e-04            | LBX2                  | Hypermethylated in FP vs FN |
| cg02771661 | 0.398   | 0.121   | 0.277     | 1e-04            | WNT1                  | Hypermethylated in FP vs FN |
| cg18837542 | 0.590   | 0.289   | 0.301     | 1e-04            | NA                    | Hypermethylated in FP vs FN |
| cg15254238 | 0.554   | 0.280   | 0.274     | 1e-04            | NA                    | Hypermethylated in FP vs FN |
| cg15982972 | 0.595   | 0.305   | 0.290     | 1e-04            | NA                    | Hypermethylated in FP vs FN |
| cg18603228 | 0.397   | 0.116   | 0.281     | 1e-04            | FBLN2                 | Hypermethylated in FP vs FN |
| cg18628646 | 0.686   | 0.372   | 0.314     | 1e-04            | NA                    | Hypermethylated in FP vs FN |
| cg01185573 | 0.835   | 0.541   | 0.294     | 1e-04            | NA                    | Hypermethylated in FP vs FN |
| cg03281139 | 0.690   | 0.410   | 0.280     | 1e-04            | NA                    | Hypermethylated in FP vs FN |
| cg18829411 | 0.557   | 0.290   | 0.268     | 1e-04            | HMGN1                 | Hypermethylated in FP vs FN |
| cg03390211 | 0.394   | 0.118   | 0.276     | 1e-04            | NA                    | Hypermethylated in FP vs FN |
| cg11068784 | 0.902   | 0.524   | 0.377     | 1e-04            | NA                    | Hypermethylated in FP vs FN |
| cg18759732 | 0.547   | 0.275   | 0.272     | 1e-04            | NA                    | Hypermethylated in FP vs FN |
| cg20707780 | 0.396   | 0.093   | 0.303     | 1e-04            | ACVRL1                | Hypermethylated in FP vs FN |

### Supplementary Table 7 (continued)

| Probe      | FP.mean | FN.mean | Mean.diff | Adjusted.P.value | Promoter.related.gene | Category                    |
|------------|---------|---------|-----------|------------------|-----------------------|-----------------------------|
| cg20908789 | 0.843   | 0.546   | 0.298     | 1e-04            | NA                    | Hypermethylated in FP vs FN |
| cg16651900 | 0.712   | 0.439   | 0.274     | 1e-04            | NA                    | Hypermethylated in FP vs FN |
| cg21421278 | 0.360   | 0.098   | 0.262     | 1e-04            | NA                    | Hypermethylated in FP vs FN |
| cg23420286 | 0.520   | 0.246   | 0.274     | 1e-04            | NA                    | Hypermethylated in FP vs FN |
| cg23235067 | 0.818   | 0.520   | 0.298     | 1e-04            | NA                    | Hypermethylated in FP vs FN |
| cg18894521 | 0.710   | 0.445   | 0.266     | 1e-04            | NA                    | Hypermethylated in FP vs FN |
| cg10321156 | 0.523   | 0.204   | 0.319     | 1e-04            | NA                    | Hypermethylated in FP vs FN |
| cg24799830 | 0.792   | 0.497   | 0.294     | 1e-04            | ELMO1                 | Hypermethylated in FP vs FN |
| cg01067151 | 0.582   | 0.283   | 0.299     | 1e-04            | NA                    | Hypermethylated in FP vs FN |
| cg23051248 | 0.652   | 0.374   | 0.278     | 1e-04            | NA                    | Hypermethylated in FP vs FN |
| cg19793905 | 0.682   | 0.422   | 0.261     | 1e-04            | RBM43                 | Hypermethylated in FP vs FN |
| cg16800623 | 0.660   | 0.383   | 0.277     | 1e-04            | NA                    | Hypermethylated in FP vs FN |
| cg17546247 | 0.859   | 0.472   | 0.387     | 1e-04            | ZIC4_ZIC1             | Hypermethylated in FP vs FN |
| cg04220579 | 0.408   | 0.125   | 0.283     | 1e-04            | C7orf20               | Hypermethylated in FP vs FN |
| cg11722971 | 0.610   | 0.344   | 0.266     | 1e-04            | NA                    | Hypermethylated in FP vs FN |
| cg20347893 | 0.709   | 0.414   | 0.295     | 1e-04            | NA                    | Hypermethylated in FP vs FN |
| cg22499307 | 0.763   | 0.503   | 0.260     | 1e-04            | NA                    | Hypermethylated in FP vs FN |
| cg27304533 | 0.699   | 0.379   | 0.320     | 1e-04            | NA                    | Hypermethylated in FP vs FN |
| cg03828874 | 0.684   | 0.408   | 0.276     | 1e-04            | NA                    | Hypermethylated in FP vs FN |
| cg25391815 | 0.397   | 0.121   | 0.276     | 1e-04            | NA                    | Hypermethylated in FP vs FN |
| cg07313523 | 0.671   | 0.369   | 0.302     | 1e-04            | NA                    | Hypermethylated in FP vs FN |
| cg10909939 | 0.850   | 0.514   | 0.336     | 1e-04            | NA                    | Hypermethylated in FP vs FN |
| cg26034516 | 0.607   | 0.267   | 0.341     | 1e-04            | NA                    | Hypermethylated in FP vs FN |
| cg08187687 | 0.568   | 0.269   | 0.299     | 1e-04            | NA                    | Hypermethylated in FP vs FN |
| cg10731022 | 0.375   | 0.108   | 0.267     | 1e-04            | EIF4EBP3              | Hypermethylated in FP vs FN |

### Supplementary Table 7 (continued)

| Probe      | FP.mean | FN.mean | Mean.diff | Adjusted.P.value | Promoter.related.gene | Category                    |
|------------|---------|---------|-----------|------------------|-----------------------|-----------------------------|
| cg10364249 | 0.499   | 0.236   | 0.263     | 1e-04            | NA                    | Hypermethylated in FP vs FN |
| cg04131583 | 0.693   | 0.320   | 0.372     | 1e-04            | NA                    | Hypermethylated in FP vs FN |
| cg27196131 | 0.682   | 0.378   | 0.304     | 1e-04            | NA                    | Hypermethylated in FP vs FN |
| cg02767665 | 0.794   | 0.523   | 0.271     | 1e-04            | NA                    | Hypermethylated in FP vs FN |
| cg23745864 | 0.724   | 0.461   | 0.263     | 1e-04            | NA                    | Hypermethylated in FP vs FN |
| cg21199629 | 0.798   | 0.529   | 0.269     | 1e-04            | NA                    | Hypermethylated in FP vs FN |
| cg18813527 | 0.818   | 0.537   | 0.281     | 1e-04            | NA                    | Hypermethylated in FP vs FN |
| cg13378628 | 0.401   | 0.139   | 0.262     | 1e-04            | OTP                   | Hypermethylated in FP vs FN |
| cg00110846 | 0.767   | 0.502   | 0.265     | 1e-04            | NA                    | Hypermethylated in FP vs FN |
| cg18881778 | 0.483   | 0.230   | 0.254     | 1e-04            | NA                    | Hypermethylated in FP vs FN |
| cg26234980 | 0.396   | 0.142   | 0.254     | 1e-04            | CYGB                  | Hypermethylated in FP vs FN |
| cg02910959 | 0.565   | 0.280   | 0.285     | 1e-04            | NA                    | Hypermethylated in FP vs FN |
| cg16652747 | 0.735   | 0.451   | 0.285     | 1e-04            | NA                    | Hypermethylated in FP vs FN |
| cg01978937 | 0.735   | 0.484   | 0.251     | 1e-04            | NA                    | Hypermethylated in FP vs FN |
| cg02351655 | 0.641   | 0.351   | 0.290     | 1e-04            | NA                    | Hypermethylated in FP vs FN |
| cg14180758 | 0.547   | 0.288   | 0.258     | 1e-04            | NA                    | Hypermethylated in FP vs FN |
| cg11608958 | 0.737   | 0.464   | 0.273     | 1e-04            | NA                    | Hypermethylated in FP vs FN |
| cg17574269 | 0.747   | 0.464   | 0.284     | 1e-04            | NA                    | Hypermethylated in FP vs FN |
| cg23479053 | 0.787   | 0.488   | 0.299     | 1e-04            | NA                    | Hypermethylated in FP vs FN |
| cg21269843 | 0.508   | 0.233   | 0.275     | 1e-04            | OTP                   | Hypermethylated in FP vs FN |
| cg05548555 | 0.722   | 0.370   | 0.352     | 1e-04            | ZIC4                  | Hypermethylated in FP vs FN |
| cg22796860 | 0.757   | 0.352   | 0.405     | 1e-04            | NA                    | Hypermethylated in FP vs FN |
| cg00850612 | 0.694   | 0.377   | 0.317     | 1e-04            | NA                    | Hypermethylated in FP vs FN |
| cg18088494 | 0.472   | 0.183   | 0.290     | 1e-04            | NA                    | Hypermethylated in FP vs FN |
| cg01556706 | 0.544   | 0.266   | 0.279     | 1e-04            | NA                    | Hypermethylated in FP vs FN |

### Supplementary Table 7 (continued)

| Probe      | FP.mean | FN.mean | Mean.diff | Adjusted.P.value | Promoter.related.gene | Category                    |
|------------|---------|---------|-----------|------------------|-----------------------|-----------------------------|
| cg16274024 | 0.620   | 0.343   | 0.277     | 1e-04            | NA                    | Hypermethylated in FP vs FN |
| cg04675539 | 0.600   | 0.312   | 0.288     | 1e-04            | NA                    | Hypermethylated in FP vs FN |
| cg05875982 | 0.774   | 0.501   | 0.274     | 1e-04            | NA                    | Hypermethylated in FP vs FN |
| cg06741336 | 0.828   | 0.512   | 0.315     | 1e-04            | NA                    | Hypermethylated in FP vs FN |
| cg21168134 | 0.805   | 0.491   | 0.314     | 1e-04            | SLC35F4               | Hypermethylated in FP vs FN |
| cg04628369 | 0.729   | 0.406   | 0.322     | 1e-04            | NA                    | Hypermethylated in FP vs FN |
| cg16473762 | 0.521   | 0.199   | 0.322     | 1e-04            | NA                    | Hypermethylated in FP vs FN |
| cg12403142 | 0.776   | 0.412   | 0.364     | 1e-04            | NA                    | Hypermethylated in FP vs FN |
| cg26846424 | 0.447   | 0.174   | 0.273     | 1e-04            | NA                    | Hypermethylated in FP vs FN |
| cg00078299 | 0.716   | 0.422   | 0.294     | 1e-04            | NA                    | Hypermethylated in FP vs FN |
| cg03162779 | 0.685   | 0.404   | 0.281     | 1e-04            | NA                    | Hypermethylated in FP vs FN |
| cg20431191 | 0.772   | 0.425   | 0.347     | 1e-04            | DDAH1                 | Hypermethylated in FP vs FN |
| cg14260002 | 0.643   | 0.383   | 0.260     | 1e-04            | NA                    | Hypermethylated in FP vs FN |
| cg22818433 | 0.552   | 0.284   | 0.268     | 1e-04            | NA                    | Hypermethylated in FP vs FN |
| cg22635676 | 0.702   | 0.321   | 0.381     | 1e-04            | NA                    | Hypermethylated in FP vs FN |
| cg00470007 | 0.720   | 0.408   | 0.312     | 1e-04            | NA                    | Hypermethylated in FP vs FN |
| cg03330678 | 0.740   | 0.462   | 0.278     | 1e-04            | 9-Sep                 | Hypermethylated in FP vs FN |
| cg17981058 | 0.776   | 0.383   | 0.393     | 1e-04            | NA                    | Hypermethylated in FP vs FN |
| cg25609393 | 0.487   | 0.210   | 0.277     | 1e-04            | NA                    | Hypermethylated in FP vs FN |
| cg13691209 | 0.657   | 0.386   | 0.270     | 1e-04            | NA                    | Hypermethylated in FP vs FN |
| cg19807286 | 0.767   | 0.509   | 0.257     | 1e-04            | NA                    | Hypermethylated in FP vs FN |
| cg01646109 | 0.483   | 0.219   | 0.265     | 1e-04            | NA                    | Hypermethylated in FP vs FN |
| cg13990926 | 0.518   | 0.190   | 0.328     | 1e-04            | NA                    | Hypermethylated in FP vs FN |
| cg24975649 | 0.796   | 0.544   | 0.252     | 1e-04            | NA                    | Hypermethylated in FP vs FN |
| cg10106284 | 0.629   | 0.355   | 0.274     | 1e-04            | FAM49A                | Hypermethylated in FP vs FN |

### Supplementary Table 7 (continued)

| Probe      | FP.mean | FN.mean | Mean.diff | Adjusted.P.value | Promoter.related.gene | Category                    |
|------------|---------|---------|-----------|------------------|-----------------------|-----------------------------|
| cg23491743 | 0.671   | 0.312   | 0.359     | 1e-04            | NA                    | Hypermethylated in FP vs FN |
| cg06085985 | 0.470   | 0.178   | 0.292     | 1e-04            | NA                    | Hypermethylated in FP vs FN |
| cg21941030 | 0.654   | 0.294   | 0.359     | 1e-04            | RCN3                  | Hypermethylated in FP vs FN |
| cg02372889 | 0.515   | 0.224   | 0.291     | 1e-04            | NA                    | Hypermethylated in FP vs FN |
| cg15876968 | 0.734   | 0.421   | 0.313     | 1e-04            | NA                    | Hypermethylated in FP vs FN |
| cg27070951 | 0.677   | 0.415   | 0.262     | 1e-04            | NA                    | Hypermethylated in FP vs FN |
| cg14754787 | 0.505   | 0.194   | 0.311     | 1e-04            | NA                    | Hypermethylated in FP vs FN |
| cg09145147 | 0.857   | 0.591   | 0.266     | 1e-04            | NA                    | Hypermethylated in FP vs FN |
| cg03320743 | 0.756   | 0.479   | 0.276     | 1e-04            | NA                    | Hypermethylated in FP vs FN |
| cg01048445 | 0.641   | 0.284   | 0.357     | 1e-04            | NA                    | Hypermethylated in FP vs FN |
| cg26195356 | 0.762   | 0.410   | 0.352     | 1e-04            | NA                    | Hypermethylated in FP vs FN |
| cg26195829 | 0.472   | 0.209   | 0.263     | 1e-04            | NA                    | Hypermethylated in FP vs FN |
| cg01383955 | 0.724   | 0.448   | 0.276     | 1e-04            | NFAM1                 | Hypermethylated in FP vs FN |
| cg00351635 | 0.593   | 0.340   | 0.253     | 1e-04            | NA                    | Hypermethylated in FP vs FN |
| cg06179011 | 0.528   | 0.250   | 0.278     | 1e-04            | TSPAN4_POLR2L         | Hypermethylated in FP vs FN |
| cg06319288 | 0.614   | 0.326   | 0.288     | 1e-04            | CCDC116               | Hypermethylated in FP vs FN |
| cg04268670 | 0.407   | 0.137   | 0.270     | 1e-04            | NA                    | Hypermethylated in FP vs FN |
| cg22332257 | 0.605   | 0.325   | 0.280     | 1e-04            | NA                    | Hypermethylated in FP vs FN |
| cg16663419 | 0.875   | 0.620   | 0.255     | 1e-04            | NA                    | Hypermethylated in FP vs FN |
| cg06769296 | 0.701   | 0.337   | 0.364     | 1e-04            | NA                    | Hypermethylated in FP vs FN |
| cg03308399 | 0.620   | 0.302   | 0.318     | 1e-04            | NA                    | Hypermethylated in FP vs FN |
| cg00599463 | 0.769   | 0.463   | 0.306     | 1e-04            | NA                    | Hypermethylated in FP vs FN |
| cg21855211 | 0.829   | 0.527   | 0.302     | 1e-04            | NA                    | Hypermethylated in FP vs FN |
| cg03291755 | 0.713   | 0.439   | 0.274     | 1e-04            | NA                    | Hypermethylated in FP vs FN |
| cg09050058 | 0.822   | 0.568   | 0.255     | 1e-04            | NA                    | Hypermethylated in FP vs FN |



### Supplementary Table 7 (continued)

| Probe      | FP.mean | FN.mean | Mean.diff | Adjusted.P.value | Promoter.related.gene | Category                    |
|------------|---------|---------|-----------|------------------|-----------------------|-----------------------------|
| cg12836280 | 0.659   | 0.358   | 0.301     | 1e-04            | NA                    | Hypermethylated in FP vs FN |
| cg06691542 | 0.648   | 0.347   | 0.301     | 1e-04            | NA                    | Hypermethylated in FP vs FN |
| cg08420572 | 0.783   | 0.428   | 0.356     | 1e-04            | NA                    | Hypermethylated in FP vs FN |
| cg26982695 | 0.531   | 0.279   | 0.252     | 1e-04            | NA                    | Hypermethylated in FP vs FN |
| cg05620558 | 0.622   | 0.363   | 0.260     | 1e-04            | NA                    | Hypermethylated in FP vs FN |
| cg07132183 | 0.847   | 0.580   | 0.267     | 1e-04            | NA                    | Hypermethylated in FP vs FN |
| cg19593680 | 0.709   | 0.426   | 0.283     | 1e-04            | NA                    | Hypermethylated in FP vs FN |
| cg05521792 | 0.319   | 0.062   | 0.257     | 1e-04            | NA                    | Hypermethylated in FP vs FN |
| cg00852595 | 0.827   | 0.515   | 0.312     | 1e-04            | ANKS1B                | Hypermethylated in FP vs FN |
| cg04635983 | 0.638   | 0.351   | 0.287     | 1e-04            | NA                    | Hypermethylated in FP vs FN |
| cg25176746 | 0.818   | 0.470   | 0.348     | 1e-04            | NA                    | Hypermethylated in FP vs FN |
| cg20172636 | 0.641   | 0.382   | 0.259     | 1e-04            | NA                    | Hypermethylated in FP vs FN |
| cg07403865 | 0.494   | 0.225   | 0.269     | 1e-04            | NA                    | Hypermethylated in FP vs FN |
| cg05226061 | 0.546   | 0.278   | 0.268     | 1e-04            | PLXDC1                | Hypermethylated in FP vs FN |
| cg19864130 | 0.804   | 0.470   | 0.334     | 1e-04            | SBNO2                 | Hypermethylated in FP vs FN |
| cg09073539 | 0.572   | 0.243   | 0.328     | 1e-04            | NA                    | Hypermethylated in FP vs FN |
| cg00059737 | 0.693   | 0.440   | 0.254     | 1e-04            | NA                    | Hypermethylated in FP vs FN |
| cg19951297 | 0.607   | 0.334   | 0.273     | 1e-04            | NA                    | Hypermethylated in FP vs FN |
| cg27425146 | 0.485   | 0.235   | 0.250     | 1e-04            | NA                    | Hypermethylated in FP vs FN |
| cg11116086 | 0.755   | 0.502   | 0.253     | 1e-04            | NA                    | Hypermethylated in FP vs FN |
| cg11288641 | 0.331   | 0.063   | 0.268     | 1e-04            | FAM3B                 | Hypermethylated in FP vs FN |
| cg01636650 | 0.726   | 0.320   | 0.406     | 1e-04            | NA                    | Hypermethylated in FP vs FN |
| cg16455791 | 0.381   | 0.123   | 0.257     | 1e-04            | NA                    | Hypermethylated in FP vs FN |
| cg24243629 | 0.545   | 0.280   | 0.265     | 1e-04            | NA                    | Hypermethylated in FP vs FN |
| cg14838433 | 0.495   | 0.200   | 0.295     | 1e-04            | TMEM61                | Hypermethylated in FP vs FN |

### Supplementary Table 7 (continued)

| Probe      | FP.mean | FN.mean | Mean.diff | Adjusted.P.value | Promoter.related.gene | Category                    |
|------------|---------|---------|-----------|------------------|-----------------------|-----------------------------|
| cg25207248 | 0.448   | 0.182   | 0.266     | 1e-04            | NA                    | Hypermethylated in FP vs FN |
| cg12523526 | 0.546   | 0.239   | 0.307     | 1e-04            | NA                    | Hypermethylated in FP vs FN |
| cg24274117 | 0.612   | 0.217   | 0.395     | 1e-04            | NA                    | Hypermethylated in FP vs FN |
| cg19583968 | 0.467   | 0.185   | 0.282     | 1e-04            | TMEM61                | Hypermethylated in FP vs FN |
| cg26724949 | 0.690   | 0.357   | 0.333     | 1e-04            | NA                    | Hypermethylated in FP vs FN |
| cg12550344 | 0.482   | 0.230   | 0.251     | 1e-04            | NA                    | Hypermethylated in FP vs FN |
| cg08222702 | 0.804   | 0.526   | 0.278     | 1e-04            | NA                    | Hypermethylated in FP vs FN |
| cg11767181 | 0.409   | 0.108   | 0.301     | 1e-04            | NA                    | Hypermethylated in FP vs FN |
| cg14836602 | 0.747   | 0.425   | 0.322     | 1e-04            | NA                    | Hypermethylated in FP vs FN |
| cg17414101 | 0.724   | 0.402   | 0.322     | 1e-04            | NA                    | Hypermethylated in FP vs FN |
| cg16072192 | 0.755   | 0.457   | 0.298     | 2e-04            | NA                    | Hypermethylated in FP vs FN |
| cg26426938 | 0.678   | 0.399   | 0.278     | 2e-04            | NA                    | Hypermethylated in FP vs FN |
| cg25716814 | 0.758   | 0.411   | 0.347     | 2e-04            | NA                    | Hypermethylated in FP vs FN |
| cg11142389 | 0.805   | 0.456   | 0.350     | 2e-04            | ZIC4_ZIC1             | Hypermethylated in FP vs FN |
| cg25450266 | 0.659   | 0.397   | 0.262     | 2e-04            | NA                    | Hypermethylated in FP vs FN |
| cg08794940 | 0.552   | 0.263   | 0.289     | 2e-04            | FLOT1                 | Hypermethylated in FP vs FN |
| cg26206894 | 0.719   | 0.458   | 0.261     | 2e-04            | NA                    | Hypermethylated in FP vs FN |
| cg04468543 | 0.618   | 0.269   | 0.349     | 2e-04            | NA                    | Hypermethylated in FP vs FN |
| cg16254756 | 0.540   | 0.290   | 0.251     | 2e-04            | SHC1                  | Hypermethylated in FP vs FN |
| cg27311590 | 0.841   | 0.568   | 0.273     | 2e-04            | NA                    | Hypermethylated in FP vs FN |
| cg19968403 | 0.435   | 0.181   | 0.254     | 2e-04            | COL8A1                | Hypermethylated in FP vs FN |
| cg00070899 | 0.684   | 0.376   | 0.307     | 2e-04            | NA                    | Hypermethylated in FP vs FN |
| cg01928078 | 0.570   | 0.309   | 0.261     | 2e-04            | IL10RB                | Hypermethylated in FP vs FN |
| cg24083817 | 0.730   | 0.381   | 0.350     | 2e-04            | NA                    | Hypermethylated in FP vs FN |
| cg22975160 | 0.395   | 0.108   | 0.287     | 2e-04            | NA                    | Hypermethylated in FP vs FN |

### Supplementary Table 7 (continued)

| Probe      | FP.mean | FN.mean | Mean.diff | Adjusted.P.value | Promoter.related.gene | Category                    |
|------------|---------|---------|-----------|------------------|-----------------------|-----------------------------|
| cg17620121 | 0.355   | 0.082   | 0.272     | 2e-04            | C7orf20               | Hypermethylated in FP vs FN |
| cg10962762 | 0.873   | 0.503   | 0.369     | 2e-04            | NA                    | Hypermethylated in FP vs FN |
| cg23936410 | 0.515   | 0.235   | 0.280     | 2e-04            | NA                    | Hypermethylated in FP vs FN |
| cg08060454 | 0.410   | 0.156   | 0.254     | 2e-04            | NA                    | Hypermethylated in FP vs FN |
| cg15374754 | 0.773   | 0.517   | 0.255     | 2e-04            | NA                    | Hypermethylated in FP vs FN |
| cg04172795 | 0.707   | 0.446   | 0.261     | 2e-04            | NA                    | Hypermethylated in FP vs FN |
| cg06489606 | 0.628   | 0.353   | 0.275     | 2e-04            | NA                    | Hypermethylated in FP vs FN |
| cg10203211 | 0.821   | 0.524   | 0.296     | 2e-04            | NA                    | Hypermethylated in FP vs FN |
| cg03875156 | 0.529   | 0.213   | 0.317     | 2e-04            | NA                    | Hypermethylated in FP vs FN |
| cg17152266 | 0.595   | 0.339   | 0.256     | 2e-04            | NA                    | Hypermethylated in FP vs FN |
| cg03714522 | 0.505   | 0.215   | 0.291     | 2e-04            | NA                    | Hypermethylated in FP vs FN |
| cg17291521 | 0.384   | 0.124   | 0.260     | 2e-04            | NA                    | Hypermethylated in FP vs FN |
| cg08885800 | 0.622   | 0.279   | 0.343     | 2e-04            | NA                    | Hypermethylated in FP vs FN |
| cg10724867 | 0.779   | 0.495   | 0.284     | 2e-04            | NA                    | Hypermethylated in FP vs FN |
| cg03389926 | 0.452   | 0.187   | 0.265     | 2e-04            | NA                    | Hypermethylated in FP vs FN |
| cg03893446 | 0.722   | 0.462   | 0.260     | 2e-04            | NA                    | Hypermethylated in FP vs FN |
| cg10296718 | 0.706   | 0.423   | 0.284     | 2e-04            | NA                    | Hypermethylated in FP vs FN |
| cg06620993 | 0.535   | 0.270   | 0.265     | 2e-04            | NA                    | Hypermethylated in FP vs FN |
| cg18559249 | 0.687   | 0.369   | 0.318     | 2e-04            | NA                    | Hypermethylated in FP vs FN |
| cg10765471 | 0.763   | 0.358   | 0.405     | 2e-04            | NA                    | Hypermethylated in FP vs FN |
| cg27452922 | 0.741   | 0.441   | 0.300     | 2e-04            | NA                    | Hypermethylated in FP vs FN |
| cg10741308 | 0.641   | 0.382   | 0.260     | 2e-04            | NA                    | Hypermethylated in FP vs FN |
| cg24139639 | 0.791   | 0.520   | 0.271     | 2e-04            | NA                    | Hypermethylated in FP vs FN |
| cg22982093 | 0.621   | 0.327   | 0.293     | 2e-04            | NA                    | Hypermethylated in FP vs FN |
| cg09335713 | 0.738   | 0.454   | 0.284     | 2e-04            | NFAM1                 | Hypermethylated in FP vs FN |

### Supplementary Table 7 (continued)

| Probe      | FP.mean | FN.mean | Mean.diff | Adjusted.P.value | Promoter.related.gene | Category                    |
|------------|---------|---------|-----------|------------------|-----------------------|-----------------------------|
| cg25894160 | 0.670   | 0.415   | 0.255     | 2e-04            | C20orf3               | Hypermethylated in FP vs FN |
| cg09486406 | 0.459   | 0.162   | 0.297     | 2e-04            | NA                    | Hypermethylated in FP vs FN |
| cg24254387 | 0.608   | 0.339   | 0.268     | 2e-04            | BTBD19_TCTEX1D4       | Hypermethylated in FP vs FN |
| cg06596654 | 0.662   | 0.327   | 0.336     | 2e-04            | NA                    | Hypermethylated in FP vs FN |
| cg05583608 | 0.519   | 0.179   | 0.341     | 2e-04            | NA                    | Hypermethylated in FP vs FN |
| cg21177821 | 0.650   | 0.306   | 0.343     | 2e-04            | NA                    | Hypermethylated in FP vs FN |
| cg10855825 | 0.696   | 0.432   | 0.264     | 2e-04            | NA                    | Hypermethylated in FP vs FN |
| cg06521544 | 0.686   | 0.427   | 0.258     | 2e-04            | ARHGEF3               | Hypermethylated in FP vs FN |
| cg25015791 | 0.710   | 0.434   | 0.276     | 2e-04            | NA                    | Hypermethylated in FP vs FN |
| cg13564061 | 0.504   | 0.250   | 0.253     | 2e-04            | NA                    | Hypermethylated in FP vs FN |
| cg00539347 | 0.440   | 0.167   | 0.272     | 2e-04            | NA                    | Hypermethylated in FP vs FN |
| cg06368590 | 0.488   | 0.136   | 0.351     | 2e-04            | NA                    | Hypermethylated in FP vs FN |
| cg09643136 | 0.841   | 0.513   | 0.329     | 2e-04            | NA                    | Hypermethylated in FP vs FN |
| cg20640373 | 0.452   | 0.161   | 0.291     | 2e-04            | NA                    | Hypermethylated in FP vs FN |
| cg25926515 | 0.574   | 0.300   | 0.274     | 2e-04            | NA                    | Hypermethylated in FP vs FN |
| cg25620901 | 0.592   | 0.277   | 0.315     | 2e-04            | NA                    | Hypermethylated in FP vs FN |
| cg08467103 | 0.689   | 0.347   | 0.342     | 2e-04            | SPRED2                | Hypermethylated in FP vs FN |
| cg05291508 | 0.435   | 0.163   | 0.272     | 2e-04            | NA                    | Hypermethylated in FP vs FN |
| cg07807210 | 0.848   | 0.494   | 0.354     | 2e-04            | NA                    | Hypermethylated in FP vs FN |
| cg10807894 | 0.556   | 0.305   | 0.251     | 2e-04            | NA                    | Hypermethylated in FP vs FN |
| cg13554818 | 0.579   | 0.289   | 0.290     | 2e-04            | NA                    | Hypermethylated in FP vs FN |
| cg25062778 | 0.742   | 0.447   | 0.294     | 2e-04            | NA                    | Hypermethylated in FP vs FN |
| cg22955449 | 0.381   | 0.118   | 0.263     | 2e-04            | GSTO2                 | Hypermethylated in FP vs FN |
| cg15617155 | 0.737   | 0.386   | 0.351     | 2e-04            | NA                    | Hypermethylated in FP vs FN |
| cg01566127 | 0.625   | 0.296   | 0.329     | 2e-04            | NA                    | Hypermethylated in FP vs FN |

### Supplementary Table 7 (continued)

| Probe      | FP.mean | FN.mean | Mean.diff | Adjusted.P.value | Promoter.related.gene | Category                    |
|------------|---------|---------|-----------|------------------|-----------------------|-----------------------------|
| cg16155382 | 0.616   | 0.352   | 0.264     | 2e-04            | NA                    | Hypermethylated in FP vs FN |
| cg01426303 | 0.584   | 0.270   | 0.314     | 2e-04            | NA                    | Hypermethylated in FP vs FN |
| cg14223293 | 0.670   | 0.314   | 0.355     | 2e-04            | NA                    | Hypermethylated in FP vs FN |
| cg06100756 | 0.744   | 0.454   | 0.290     | 2e-04            | NA                    | Hypermethylated in FP vs FN |
| cg11844856 | 0.633   | 0.382   | 0.250     | 2e-04            | NA                    | Hypermethylated in FP vs FN |
| cg06377716 | 0.680   | 0.380   | 0.300     | 2e-04            | NA                    | Hypermethylated in FP vs FN |
| cg08645670 | 0.786   | 0.430   | 0.356     | 2e-04            | FOXL1                 | Hypermethylated in FP vs FN |
| cg13015925 | 0.727   | 0.368   | 0.359     | 2e-04            | ZIC4                  | Hypermethylated in FP vs FN |
| cg06511330 | 0.558   | 0.277   | 0.281     | 2e-04            | NA                    | Hypermethylated in FP vs FN |
| cg13555354 | 0.543   | 0.243   | 0.301     | 2e-04            | DHRS4L2               | Hypermethylated in FP vs FN |
| cg16503628 | 0.756   | 0.438   | 0.318     | 2e-04            | NA                    | Hypermethylated in FP vs FN |
| cg17025555 | 0.689   | 0.384   | 0.306     | 2e-04            | OR6K6                 | Hypermethylated in FP vs FN |
| cg02415057 | 0.449   | 0.157   | 0.291     | 2e-04            | GLIPR1L2              | Hypermethylated in FP vs FN |
| cg19757631 | 0.702   | 0.432   | 0.270     | 2e-04            | NA                    | Hypermethylated in FP vs FN |
| cg04899175 | 0.712   | 0.360   | 0.352     | 2e-04            | NA                    | Hypermethylated in FP vs FN |
| cg08241360 | 0.780   | 0.484   | 0.296     | 2e-04            | NA                    | Hypermethylated in FP vs FN |
| cg18330338 | 0.749   | 0.481   | 0.268     | 2e-04            | NA                    | Hypermethylated in FP vs FN |
| cg13272412 | 0.727   | 0.453   | 0.274     | 2e-04            | NRG1                  | Hypermethylated in FP vs FN |
| cg16612423 | 0.827   | 0.492   | 0.335     | 2e-04            | NA                    | Hypermethylated in FP vs FN |
| cg06217072 | 0.802   | 0.515   | 0.287     | 2e-04            | NA                    | Hypermethylated in FP vs FN |
| cg26140293 | 0.875   | 0.616   | 0.259     | 2e-04            | NA                    | Hypermethylated in FP vs FN |
| cg09933329 | 0.824   | 0.546   | 0.277     | 2e-04            | NA                    | Hypermethylated in FP vs FN |
| cg00003625 | 0.509   | 0.242   | 0.267     | 2e-04            | WFIKKN2               | Hypermethylated in FP vs FN |
| cg22667835 | 0.700   | 0.428   | 0.272     | 2e-04            | NA                    | Hypermethylated in FP vs FN |
| cg07333231 | 0.880   | 0.587   | 0.293     | 2e-04            | NA                    | Hypermethylated in FP vs FN |

### Supplementary Table 7 (continued)

| Probe      | FP.mean | FN.mean | Mean.diff | Adjusted.P.value | Promoter.related.gene | Category                    |
|------------|---------|---------|-----------|------------------|-----------------------|-----------------------------|
| cg13278496 | 0.753   | 0.400   | 0.353     | 2e-04            | ZIC4                  | Hypermethylated in FP vs FN |
| cg26097051 | 0.655   | 0.356   | 0.299     | 2e-04            | NA                    | Hypermethylated in FP vs FN |
| cg09841001 | 0.617   | 0.341   | 0.276     | 2e-04            | NA                    | Hypermethylated in FP vs FN |
| cg12315284 | 0.713   | 0.447   | 0.266     | 2e-04            | NA                    | Hypermethylated in FP vs FN |
| cg10520543 | 0.683   | 0.392   | 0.290     | 2e-04            | TMEM132B              | Hypermethylated in FP vs FN |
| cg00662782 | 0.479   | 0.197   | 0.282     | 2e-04            | NA                    | Hypermethylated in FP vs FN |
| cg01301885 | 0.714   | 0.463   | 0.251     | 2e-04            | NA                    | Hypermethylated in FP vs FN |
| cg23063243 | 0.520   | 0.200   | 0.319     | 2e-04            | NA                    | Hypermethylated in FP vs FN |
| cg12179658 | 0.760   | 0.508   | 0.252     | 2e-04            | HRH1                  | Hypermethylated in FP vs FN |
| cg27390009 | 0.755   | 0.500   | 0.255     | 2e-04            | NA                    | Hypermethylated in FP vs FN |
| cg01186595 | 0.664   | 0.405   | 0.259     | 2e-04            | NA                    | Hypermethylated in FP vs FN |
| cg02140579 | 0.767   | 0.473   | 0.293     | 2e-04            | NA                    | Hypermethylated in FP vs FN |
| cg01962676 | 0.427   | 0.126   | 0.301     | 2e-04            | NA                    | Hypermethylated in FP vs FN |
| cg21844956 | 0.704   | 0.390   | 0.313     | 2e-04            | NA                    | Hypermethylated in FP vs FN |
| cg10690919 | 0.522   | 0.211   | 0.311     | 2e-04            | WFIKKN2               | Hypermethylated in FP vs FN |
| cg04041976 | 0.551   | 0.276   | 0.275     | 2e-04            | NA                    | Hypermethylated in FP vs FN |
| cg27072218 | 0.852   | 0.598   | 0.254     | 2e-04            | NA                    | Hypermethylated in FP vs FN |
| cg17618327 | 0.498   | 0.161   | 0.337     | 2e-04            | NA                    | Hypermethylated in FP vs FN |
| cg18717146 | 0.556   | 0.301   | 0.255     | 2e-04            | NA                    | Hypermethylated in FP vs FN |
| cg03390723 | 0.453   | 0.189   | 0.263     | 2e-04            | GSTO2                 | Hypermethylated in FP vs FN |
| cg00436496 | 0.781   | 0.505   | 0.275     | 2e-04            | NA                    | Hypermethylated in FP vs FN |
| cg04516022 | 0.647   | 0.354   | 0.293     | 2e-04            | NA                    | Hypermethylated in FP vs FN |
| cg04988978 | 0.618   | 0.341   | 0.277     | 2e-04            | MPO                   | Hypermethylated in FP vs FN |
| cg04995300 | 0.781   | 0.506   | 0.275     | 2e-04            | NA                    | Hypermethylated in FP vs FN |
| cg07216194 | 0.576   | 0.313   | 0.263     | 2e-04            | PTK2B                 | Hypermethylated in FP vs FN |

### Supplementary Table 7 (continued)

| Probe      | FP.mean | FN.mean | Mean.diff | Adjusted.P.value | Promoter.related.gene | Category                    |
|------------|---------|---------|-----------|------------------|-----------------------|-----------------------------|
| cg24741066 | 0.558   | 0.268   | 0.290     | 2e-04            | NA                    | Hypermethylated in FP vs FN |
| cg05210501 | 0.569   | 0.261   | 0.308     | 2e-04            | HOXA10                | Hypermethylated in FP vs FN |
| cg02646021 | 0.751   | 0.392   | 0.359     | 2e-04            | NA                    | Hypermethylated in FP vs FN |
| cg06835156 | 0.694   | 0.377   | 0.317     | 2e-04            | NA                    | Hypermethylated in FP vs FN |
| cg06369327 | 0.693   | 0.390   | 0.303     | 2e-04            | ZIC4                  | Hypermethylated in FP vs FN |
| cg09510752 | 0.755   | 0.485   | 0.270     | 2e-04            | NA                    | Hypermethylated in FP vs FN |
| cg16565696 | 0.641   | 0.367   | 0.274     | 2e-04            | NA                    | Hypermethylated in FP vs FN |
| cg21453840 | 0.825   | 0.528   | 0.297     | 2e-04            | NA                    | Hypermethylated in FP vs FN |
| cg18343474 | 0.694   | 0.374   | 0.320     | 2e-04            | NA                    | Hypermethylated in FP vs FN |
| cg14157435 | 0.809   | 0.480   | 0.329     | 2e-04            | NA                    | Hypermethylated in FP vs FN |
| cg14637919 | 0.576   | 0.298   | 0.278     | 2e-04            | NA                    | Hypermethylated in FP vs FN |
| cg06143901 | 0.733   | 0.474   | 0.259     | 2e-04            | TCF15                 | Hypermethylated in FP vs FN |
| cg09476997 | 0.868   | 0.592   | 0.276     | 2e-04            | NA                    | Hypermethylated in FP vs FN |
| cg14865868 | 0.603   | 0.303   | 0.301     | 2e-04            | TRIB2                 | Hypermethylated in FP vs FN |
| cg18557556 | 0.495   | 0.231   | 0.264     | 2e-04            | KRR1                  | Hypermethylated in FP vs FN |
| cg21004104 | 0.769   | 0.510   | 0.258     | 2e-04            | NA                    | Hypermethylated in FP vs FN |
| cg01860063 | 0.640   | 0.351   | 0.288     | 2e-04            | NA                    | Hypermethylated in FP vs FN |
| cg17928147 | 0.739   | 0.390   | 0.349     | 2e-04            | NA                    | Hypermethylated in FP vs FN |
| cg08738300 | 0.562   | 0.302   | 0.260     | 2e-04            | NA                    | Hypermethylated in FP vs FN |
| cg09149672 | 0.781   | 0.512   | 0.269     | 2e-04            | NA                    | Hypermethylated in FP vs FN |
| cg16195091 | 0.616   | 0.292   | 0.324     | 2e-04            | NA                    | Hypermethylated in FP vs FN |
| cg24700485 | 0.466   | 0.151   | 0.315     | 2e-04            | NA                    | Hypermethylated in FP vs FN |
| cg13682095 | 0.430   | 0.103   | 0.326     | 2e-04            | NA                    | Hypermethylated in FP vs FN |
| cg06059056 | 0.385   | 0.092   | 0.293     | 2e-04            | IQSEC1                | Hypermethylated in FP vs FN |
| cg04937144 | 0.568   | 0.292   | 0.276     | 2e-04            | NA                    | Hypermethylated in FP vs FN |

### Supplementary Table 7 (continued)

| Probe      | FP.mean | FN.mean | Mean.diff | Adjusted.P.value | Promoter.related.gene | Category                    |
|------------|---------|---------|-----------|------------------|-----------------------|-----------------------------|
| cg19876302 | 0.741   | 0.478   | 0.263     | 2e-04            | NA                    | Hypermethylated in FP vs FN |
| cg16644967 | 0.682   | 0.427   | 0.255     | 2e-04            | NA                    | Hypermethylated in FP vs FN |
| cg19697558 | 0.631   | 0.324   | 0.307     | 2e-04            | NA                    | Hypermethylated in FP vs FN |
| cg01175550 | 0.731   | 0.471   | 0.260     | 2e-04            | NA                    | Hypermethylated in FP vs FN |
| cg18185958 | 0.708   | 0.355   | 0.353     | 2e-04            | NA                    | Hypermethylated in FP vs FN |
| cg15264020 | 0.717   | 0.435   | 0.282     | 2e-04            | NA                    | Hypermethylated in FP vs FN |
| cg03592051 | 0.636   | 0.383   | 0.253     | 2e-04            | GSG1L                 | Hypermethylated in FP vs FN |
| cg00982919 | 0.725   | 0.394   | 0.330     | 2e-04            | NA                    | Hypermethylated in FP vs FN |
| cg03018679 | 0.787   | 0.511   | 0.276     | 2e-04            | NA                    | Hypermethylated in FP vs FN |
| cg10161111 | 0.629   | 0.339   | 0.289     | 2e-04            | NA                    | Hypermethylated in FP vs FN |
| cg12378867 | 0.785   | 0.530   | 0.255     | 2e-04            | NA                    | Hypermethylated in FP vs FN |
| cg08070028 | 0.416   | 0.145   | 0.270     | 2e-04            | USP2                  | Hypermethylated in FP vs FN |
| cg02297063 | 0.767   | 0.391   | 0.375     | 2e-04            | SBNO2                 | Hypermethylated in FP vs FN |
| cg12093371 | 0.387   | 0.101   | 0.287     | 2e-04            | NA                    | Hypermethylated in FP vs FN |
| cg02100410 | 0.722   | 0.455   | 0.267     | 2e-04            | LBX2                  | Hypermethylated in FP vs FN |
| cg08645907 | 0.622   | 0.366   | 0.256     | 2e-04            | ATXN7L1               | Hypermethylated in FP vs FN |
| cg06890415 | 0.573   | 0.299   | 0.274     | 2e-04            | C8orf46               | Hypermethylated in FP vs FN |
| cg08867241 | 0.588   | 0.282   | 0.306     | 2e-04            | NA                    | Hypermethylated in FP vs FN |
| cg06633061 | 0.701   | 0.415   | 0.286     | 2e-04            | NA                    | Hypermethylated in FP vs FN |
| cg16648571 | 0.616   | 0.343   | 0.273     | 2e-04            | NNAT                  | Hypermethylated in FP vs FN |
| cg26956135 | 0.795   | 0.534   | 0.261     | 2e-04            | C17orf47              | Hypermethylated in FP vs FN |
| cg25417842 | 0.619   | 0.319   | 0.300     | 2e-04            | NA                    | Hypermethylated in FP vs FN |
| cg14292619 | 0.696   | 0.436   | 0.260     | 2e-04            | GLIPR1L2              | Hypermethylated in FP vs FN |
| cg14778235 | 0.699   | 0.369   | 0.330     | 2e-04            | NA                    | Hypermethylated in FP vs FN |
| cg23628478 | 0.632   | 0.377   | 0.255     | 2e-04            | NA                    | Hypermethylated in FP vs FN |



### Supplementary Table 7 (continued)

| Probe      | FP.mean | FN.mean | Mean.diff | Adjusted.P.value | Promoter.related.gene | Category                    |
|------------|---------|---------|-----------|------------------|-----------------------|-----------------------------|
| cg04513549 | 0.426   | 0.159   | 0.268     | 2e-04            | NA                    | Hypermethylated in FP vs FN |
| cg25153741 | 0.703   | 0.395   | 0.307     | 2e-04            | NA                    | Hypermethylated in FP vs FN |
| cg22765853 | 0.440   | 0.136   | 0.304     | 2e-04            | NA                    | Hypermethylated in FP vs FN |
| cg27114640 | 0.530   | 0.204   | 0.327     | 2e-04            | NA                    | Hypermethylated in FP vs FN |
| cg20771240 | 0.687   | 0.325   | 0.361     | 2e-04            | NA                    | Hypermethylated in FP vs FN |
| cg18760837 | 0.612   | 0.350   | 0.262     | 2e-04            | NA                    | Hypermethylated in FP vs FN |
| cg25675800 | 0.810   | 0.544   | 0.267     | 3e-04            | NA                    | Hypermethylated in FP vs FN |
| cg19999567 | 0.531   | 0.255   | 0.276     | 3e-04            | NA                    | Hypermethylated in FP vs FN |
| cg05906144 | 0.661   | 0.350   | 0.310     | 3e-04            | NA                    | Hypermethylated in FP vs FN |
| cg22522598 | 0.591   | 0.308   | 0.282     | 3e-04            | NA                    | Hypermethylated in FP vs FN |
| cg24673101 | 0.497   | 0.247   | 0.251     | 3e-04            | CCDC85C               | Hypermethylated in FP vs FN |
| cg26681770 | 0.801   | 0.448   | 0.353     | 3e-04            | NA                    | Hypermethylated in FP vs FN |
| cg05991009 | 0.860   | 0.606   | 0.254     | 3e-04            | NA                    | Hypermethylated in FP vs FN |
| cg09294347 | 0.702   | 0.420   | 0.282     | 3e-04            | NA                    | Hypermethylated in FP vs FN |
| cg15316789 | 0.388   | 0.138   | 0.250     | 3e-04            | RBMS3                 | Hypermethylated in FP vs FN |
| cg09867883 | 0.619   | 0.356   | 0.263     | 3e-04            | NA                    | Hypermethylated in FP vs FN |
| cg14365785 | 0.551   | 0.288   | 0.263     | 3e-04            | NA                    | Hypermethylated in FP vs FN |
| cg07634645 | 0.632   | 0.319   | 0.313     | 3e-04            | PLBD1                 | Hypermethylated in FP vs FN |
| cg10673740 | 0.550   | 0.293   | 0.258     | 3e-04            | NA                    | Hypermethylated in FP vs FN |
| cg18433380 | 0.851   | 0.557   | 0.295     | 3e-04            | NNAT                  | Hypermethylated in FP vs FN |
| cg10617784 | 0.615   | 0.312   | 0.304     | 3e-04            | NA                    | Hypermethylated in FP vs FN |
| cg05786140 | 0.693   | 0.425   | 0.268     | 3e-04            | NA                    | Hypermethylated in FP vs FN |
| cg02915939 | 0.486   | 0.198   | 0.288     | 3e-04            | FLOT1                 | Hypermethylated in FP vs FN |
| cg25150021 | 0.774   | 0.484   | 0.290     | 3e-04            | NA                    | Hypermethylated in FP vs FN |
| cg15110353 | 0.592   | 0.290   | 0.303     | 3e-04            | NA                    | Hypermethylated in FP vs FN |

### Supplementary Table 7 (continued)

| Probe      | FP.mean | FN.mean | Mean.diff | Adjusted.P.value | Promoter.related.gene | Category                    |
|------------|---------|---------|-----------|------------------|-----------------------|-----------------------------|
| cg12409982 | 0.689   | 0.380   | 0.309     | 3e-04            | NA                    | Hypermethylated in FP vs FN |
| cg20664636 | 0.820   | 0.544   | 0.276     | 3e-04            | HIC1                  | Hypermethylated in FP vs FN |
| cg00110609 | 0.743   | 0.433   | 0.310     | 3e-04            | NA                    | Hypermethylated in FP vs FN |
| cg17337668 | 0.649   | 0.392   | 0.257     | 3e-04            | NA                    | Hypermethylated in FP vs FN |
| cg22895231 | 0.636   | 0.370   | 0.266     | 3e-04            | BCAM                  | Hypermethylated in FP vs FN |
| cg23705155 | 0.647   | 0.395   | 0.252     | 3e-04            | NA                    | Hypermethylated in FP vs FN |
| cg25963505 | 0.624   | 0.346   | 0.278     | 3e-04            | SLC13A4               | Hypermethylated in FP vs FN |
| cg14433074 | 0.683   | 0.365   | 0.318     | 3e-04            | FLOT1                 | Hypermethylated in FP vs FN |
| cg19856606 | 0.773   | 0.518   | 0.255     | 3e-04            | NA                    | Hypermethylated in FP vs FN |
| cg12247222 | 0.746   | 0.375   | 0.371     | 3e-04            | NA                    | Hypermethylated in FP vs FN |
| cg00953480 | 0.528   | 0.258   | 0.270     | 3e-04            | PAX5                  | Hypermethylated in FP vs FN |
| cg27072012 | 0.415   | 0.113   | 0.303     | 3e-04            | NA                    | Hypermethylated in FP vs FN |
| cg00706697 | 0.530   | 0.249   | 0.281     | 3e-04            | NA                    | Hypermethylated in FP vs FN |
| cg03901910 | 0.754   | 0.460   | 0.293     | 3e-04            | NA                    | Hypermethylated in FP vs FN |
| cg18845797 | 0.656   | 0.379   | 0.277     | 3e-04            | NA                    | Hypermethylated in FP vs FN |
| cg07688836 | 0.642   | 0.382   | 0.260     | 3e-04            | NA                    | Hypermethylated in FP vs FN |
| cg02677286 | 0.916   | 0.639   | 0.276     | 3e-04            | NA                    | Hypermethylated in FP vs FN |
| cg23865597 | 0.726   | 0.454   | 0.271     | 3e-04            | DYM                   | Hypermethylated in FP vs FN |
| cg12716639 | 0.861   | 0.547   | 0.315     | 3e-04            | NA                    | Hypermethylated in FP vs FN |
| cg00143249 | 0.550   | 0.295   | 0.255     | 3e-04            | NA                    | Hypermethylated in FP vs FN |
| cg15524063 | 0.607   | 0.251   | 0.357     | 3e-04            | NA                    | Hypermethylated in FP vs FN |
| cg20039257 | 0.578   | 0.308   | 0.271     | 3e-04            | NA                    | Hypermethylated in FP vs FN |
| cg07323648 | 0.713   | 0.393   | 0.320     | 3e-04            | NA                    | Hypermethylated in FP vs FN |
| cg24600895 | 0.448   | 0.185   | 0.264     | 3e-04            | NA                    | Hypermethylated in FP vs FN |
| cg00400532 | 0.585   | 0.300   | 0.285     | 3e-04            | NA                    | Hypermethylated in FP vs FN |

**Supplementary Table 7 (continued)**

| Probe      | FP.mean | FN.mean | Mean.diff | Adjusted.P.value | Promoter.related.gene | Category                    |
|------------|---------|---------|-----------|------------------|-----------------------|-----------------------------|
| cg06821079 | 0.722   | 0.445   | 0.277     | 3e-04            | KRT40                 | Hypermethylated in FP vs FN |
| cg15692239 | 0.421   | 0.151   | 0.271     | 3e-04            | ALDOC                 | Hypermethylated in FP vs FN |
| cg15923025 | 0.330   | 0.069   | 0.261     | 3e-04            | EIF4EBP3              | Hypermethylated in FP vs FN |
| cg15627089 | 0.639   | 0.294   | 0.345     | 3e-04            | NA                    | Hypermethylated in FP vs FN |
| cg16203594 | 0.659   | 0.385   | 0.275     | 3e-04            | NA                    | Hypermethylated in FP vs FN |
| cg11401957 | 0.748   | 0.494   | 0.254     | 3e-04            | NA                    | Hypermethylated in FP vs FN |
| cg08556541 | 0.751   | 0.481   | 0.270     | 3e-04            | NA                    | Hypermethylated in FP vs FN |
| cg22891413 | 0.838   | 0.584   | 0.254     | 3e-04            | NA                    | Hypermethylated in FP vs FN |
| cg13332774 | 0.365   | 0.114   | 0.251     | 3e-04            | GSTO2                 | Hypermethylated in FP vs FN |
| cg26143540 | 0.716   | 0.426   | 0.290     | 3e-04            | NA                    | Hypermethylated in FP vs FN |
| cg15121267 | 0.770   | 0.486   | 0.284     | 3e-04            | NA                    | Hypermethylated in FP vs FN |
| cg15032314 | 0.511   | 0.180   | 0.332     | 3e-04            | NA                    | Hypermethylated in FP vs FN |
| cg03507326 | 0.727   | 0.381   | 0.346     | 3e-04            | SRRM2                 | Hypermethylated in FP vs FN |
| cg17881200 | 0.732   | 0.399   | 0.334     | 3e-04            | NA                    | Hypermethylated in FP vs FN |
| cg04621944 | 0.780   | 0.522   | 0.258     | 3e-04            | NA                    | Hypermethylated in FP vs FN |
| cg23910430 | 0.830   | 0.553   | 0.277     | 3e-04            | NA                    | Hypermethylated in FP vs FN |
| cg07168556 | 0.501   | 0.250   | 0.251     | 3e-04            | WFIKKN2               | Hypermethylated in FP vs FN |
| cg16717099 | 0.430   | 0.169   | 0.260     | 3e-04            | FLOT1                 | Hypermethylated in FP vs FN |
| cg12548824 | 0.640   | 0.367   | 0.272     | 3e-04            | MTUS1                 | Hypermethylated in FP vs FN |
| cg01096381 | 0.756   | 0.493   | 0.263     | 3e-04            | NA                    | Hypermethylated in FP vs FN |
| cg22365906 | 0.730   | 0.469   | 0.261     | 3e-04            | ANKS1B                | Hypermethylated in FP vs FN |
| cg22349489 | 0.546   | 0.239   | 0.307     | 3e-04            | HIST1H2BK_HIST1H2AH   | Hypermethylated in FP vs FN |
| cg23375968 | 0.627   | 0.368   | 0.258     | 3e-04            | NA                    | Hypermethylated in FP vs FN |
| cg07058109 | 0.675   | 0.379   | 0.296     | 3e-04            | DHX58                 | Hypermethylated in FP vs FN |
| cg03291607 | 0.769   | 0.519   | 0.250     | 3e-04            | NA                    | Hypermethylated in FP vs FN |

### Supplementary Table 7 (continued)

| Probe      | FP.mean | FN.mean | Mean.diff | Adjusted.P.value | Promoter.related.gene | Category                    |
|------------|---------|---------|-----------|------------------|-----------------------|-----------------------------|
| cg01411823 | 0.610   | 0.339   | 0.271     | 3e-04            | C13orf33              | Hypermethylated in FP vs FN |
| cg08547691 | 0.400   | 0.134   | 0.266     | 3e-04            | NA                    | Hypermethylated in FP vs FN |
| cg25859099 | 0.683   | 0.372   | 0.312     | 3e-04            | NA                    | Hypermethylated in FP vs FN |
| cg01181415 | 0.696   | 0.400   | 0.296     | 3e-04            | NA                    | Hypermethylated in FP vs FN |
| cg25455598 | 0.323   | 0.067   | 0.256     | 3e-04            | PGAP2                 | Hypermethylated in FP vs FN |
| cg12279294 | 0.545   | 0.263   | 0.283     | 3e-04            | NA                    | Hypermethylated in FP vs FN |
| cg15054077 | 0.492   | 0.233   | 0.259     | 3e-04            | NA                    | Hypermethylated in FP vs FN |
| cg25363289 | 0.606   | 0.337   | 0.269     | 3e-04            | NA                    | Hypermethylated in FP vs FN |
| cg00807586 | 0.646   | 0.306   | 0.340     | 3e-04            | DLEC1                 | Hypermethylated in FP vs FN |
| cg00422488 | 0.743   | 0.435   | 0.307     | 3e-04            | NA                    | Hypermethylated in FP vs FN |
| cg12221580 | 0.715   | 0.462   | 0.253     | 3e-04            | NA                    | Hypermethylated in FP vs FN |
| cg18338984 | 0.665   | 0.380   | 0.285     | 3e-04            | NA                    | Hypermethylated in FP vs FN |
| cg24796842 | 0.508   | 0.206   | 0.302     | 3e-04            | NA                    | Hypermethylated in FP vs FN |
| cg13066016 | 0.722   | 0.428   | 0.294     | 3e-04            | NA                    | Hypermethylated in FP vs FN |
| cg17768691 | 0.630   | 0.329   | 0.301     | 3e-04            | PLBD1                 | Hypermethylated in FP vs FN |
| cg12709372 | 0.796   | 0.521   | 0.275     | 3e-04            | NA                    | Hypermethylated in FP vs FN |
| cg25090972 | 0.418   | 0.153   | 0.265     | 3e-04            | NA                    | Hypermethylated in FP vs FN |
| cg10754935 | 0.556   | 0.304   | 0.252     | 3e-04            | NA                    | Hypermethylated in FP vs FN |
| cg03339668 | 0.838   | 0.504   | 0.334     | 3e-04            | NA                    | Hypermethylated in FP vs FN |
| cg02322373 | 0.530   | 0.248   | 0.283     | 4e-04            | NA                    | Hypermethylated in FP vs FN |
| cg19907796 | 0.652   | 0.335   | 0.317     | 4e-04            | NA                    | Hypermethylated in FP vs FN |
| cg05406635 | 0.474   | 0.215   | 0.258     | 4e-04            | CCDC85C               | Hypermethylated in FP vs FN |
| cg04906575 | 0.843   | 0.566   | 0.277     | 4e-04            | NA                    | Hypermethylated in FP vs FN |
| cg20889395 | 0.539   | 0.265   | 0.274     | 4e-04            | WFIKKN2               | Hypermethylated in FP vs FN |
| cg02897537 | 0.647   | 0.325   | 0.321     | 4e-04            | NA                    | Hypermethylated in FP vs FN |

### Supplementary Table 7 (continued)

| Probe      | FP.mean | FN.mean | Mean.diff | Adjusted.P.value | Promoter.related.gene | Category                    |
|------------|---------|---------|-----------|------------------|-----------------------|-----------------------------|
| cg01427630 | 0.724   | 0.467   | 0.257     | 4e-04            | NA                    | Hypermethylated in FP vs FN |
| cg20801007 | 0.410   | 0.114   | 0.295     | 4e-04            | NA                    | Hypermethylated in FP vs FN |
| cg26538691 | 0.709   | 0.431   | 0.278     | 4e-04            | NA                    | Hypermethylated in FP vs FN |
| cg03675258 | 0.747   | 0.458   | 0.288     | 4e-04            | NA                    | Hypermethylated in FP vs FN |
| cg22236066 | 0.515   | 0.246   | 0.270     | 4e-04            | NA                    | Hypermethylated in FP vs FN |
| cg04886934 | 0.821   | 0.566   | 0.254     | 4e-04            | NA                    | Hypermethylated in FP vs FN |
| cg27430293 | 0.720   | 0.429   | 0.290     | 4e-04            | NA                    | Hypermethylated in FP vs FN |
| cg15174117 | 0.659   | 0.385   | 0.274     | 4e-04            | NA                    | Hypermethylated in FP vs FN |
| cg24800655 | 0.601   | 0.258   | 0.343     | 4e-04            | FBRSL1                | Hypermethylated in FP vs FN |
| cg22083335 | 0.700   | 0.440   | 0.260     | 4e-04            | NA                    | Hypermethylated in FP vs FN |
| cg24891133 | 0.628   | 0.301   | 0.327     | 4e-04            | C13orf33              | Hypermethylated in FP vs FN |
| cg06000878 | 0.682   | 0.407   | 0.274     | 4e-04            | NA                    | Hypermethylated in FP vs FN |
| cg09233395 | 0.619   | 0.344   | 0.275     | 4e-04            | NA                    | Hypermethylated in FP vs FN |
| cg17563034 | 0.548   | 0.249   | 0.299     | 4e-04            | CYTL1                 | Hypermethylated in FP vs FN |
| cg17603689 | 0.655   | 0.348   | 0.307     | 4e-04            | NA                    | Hypermethylated in FP vs FN |
| cg27639620 | 0.428   | 0.155   | 0.274     | 4e-04            | NA                    | Hypermethylated in FP vs FN |
| cg14707006 | 0.616   | 0.328   | 0.288     | 4e-04            | NA                    | Hypermethylated in FP vs FN |
| cg14840351 | 0.484   | 0.218   | 0.266     | 4e-04            | NA                    | Hypermethylated in FP vs FN |
| cg02283366 | 0.635   | 0.308   | 0.327     | 4e-04            | NA                    | Hypermethylated in FP vs FN |
| cg16691593 | 0.570   | 0.257   | 0.312     | 4e-04            | OTP                   | Hypermethylated in FP vs FN |
| cg08655148 | 0.814   | 0.535   | 0.278     | 4e-04            | NA                    | Hypermethylated in FP vs FN |
| cg19595750 | 0.672   | 0.297   | 0.375     | 4e-04            | FBRSL1                | Hypermethylated in FP vs FN |
| cg03344332 | 0.694   | 0.399   | 0.295     | 4e-04            | NA                    | Hypermethylated in FP vs FN |
| cg06470279 | 0.526   | 0.262   | 0.264     | 4e-04            | NA                    | Hypermethylated in FP vs FN |
| cg20995089 | 0.765   | 0.512   | 0.254     | 4e-04            | NA                    | Hypermethylated in FP vs FN |

### Supplementary Table 7 (continued)

| Probe      | FP.mean | FN.mean | Mean.diff | Adjusted.P.value | Promoter.related.gene | Category                    |
|------------|---------|---------|-----------|------------------|-----------------------|-----------------------------|
| cg07480647 | 0.820   | 0.465   | 0.355     | 4e-04            | NA                    | Hypermethylated in FP vs FN |
| cg14079333 | 0.523   | 0.252   | 0.271     | 4e-04            | NA                    | Hypermethylated in FP vs FN |
| cg20066782 | 0.738   | 0.470   | 0.268     | 4e-04            | NA                    | Hypermethylated in FP vs FN |
| cg01964852 | 0.510   | 0.238   | 0.272     | 4e-04            | NA                    | Hypermethylated in FP vs FN |
| cg05054998 | 0.751   | 0.480   | 0.270     | 4e-04            | NA                    | Hypermethylated in FP vs FN |
| cg16007541 | 0.568   | 0.316   | 0.252     | 4e-04            | NA                    | Hypermethylated in FP vs FN |
| cg14133850 | 0.765   | 0.504   | 0.260     | 4e-04            | NA                    | Hypermethylated in FP vs FN |
| cg21127068 | 0.704   | 0.378   | 0.326     | 4e-04            | ZIC4                  | Hypermethylated in FP vs FN |
| cg00668890 | 0.573   | 0.294   | 0.280     | 4e-04            | NA                    | Hypermethylated in FP vs FN |
| cg02961707 | 0.764   | 0.394   | 0.369     | 4e-04            | NA                    | Hypermethylated in FP vs FN |
| cg22764436 | 0.626   | 0.331   | 0.295     | 4e-04            | NA                    | Hypermethylated in FP vs FN |
| cg21537187 | 0.712   | 0.438   | 0.274     | 4e-04            | MTPN_LUZP6            | Hypermethylated in FP vs FN |
| cg05650846 | 0.559   | 0.296   | 0.263     | 4e-04            | NA                    | Hypermethylated in FP vs FN |
| cg26271283 | 0.705   | 0.449   | 0.257     | 4e-04            | NA                    | Hypermethylated in FP vs FN |
| cg09200260 | 0.768   | 0.486   | 0.283     | 4e-04            | NA                    | Hypermethylated in FP vs FN |
| cg07795964 | 0.836   | 0.543   | 0.293     | 4e-04            | NA                    | Hypermethylated in FP vs FN |
| cg22727641 | 0.576   | 0.260   | 0.317     | 4e-04            | FBXO43                | Hypermethylated in FP vs FN |
| cg15292765 | 0.486   | 0.191   | 0.295     | 4e-04            | NA                    | Hypermethylated in FP vs FN |
| cg15181905 | 0.801   | 0.528   | 0.273     | 4e-04            | NA                    | Hypermethylated in FP vs FN |
| cg01109169 | 0.592   | 0.274   | 0.319     | 4e-04            | NA                    | Hypermethylated in FP vs FN |
| cg23736307 | 0.624   | 0.347   | 0.277     | 4e-04            | PTK2B                 | Hypermethylated in FP vs FN |
| cg22376688 | 0.549   | 0.229   | 0.321     | 4e-04            | NA                    | Hypermethylated in FP vs FN |
| cg24006126 | 0.734   | 0.407   | 0.327     | 4e-04            | NA                    | Hypermethylated in FP vs FN |
| cg00576435 | 0.818   | 0.536   | 0.283     | 4e-04            | NNAT                  | Hypermethylated in FP vs FN |
| cg06772717 | 0.664   | 0.357   | 0.307     | 4e-04            | NA                    | Hypermethylated in FP vs FN |

### Supplementary Table 7 (continued)

| Probe      | FP.mean | FN.mean | Mean.diff | Adjusted.P.value | Promoter.related.gene | Category                    |
|------------|---------|---------|-----------|------------------|-----------------------|-----------------------------|
| cg13916255 | 0.810   | 0.546   | 0.264     | 4e-04            | CALCR                 | Hypermethylated in FP vs FN |
| cg26175448 | 0.560   | 0.291   | 0.269     | 4e-04            | NA                    | Hypermethylated in FP vs FN |
| cg27651090 | 0.825   | 0.556   | 0.268     | 4e-04            | NA                    | Hypermethylated in FP vs FN |
| cg18065680 | 0.451   | 0.177   | 0.274     | 4e-04            | NA                    | Hypermethylated in FP vs FN |
| cg27286993 | 0.432   | 0.141   | 0.291     | 4e-04            | NA                    | Hypermethylated in FP vs FN |
| cg16851482 | 0.574   | 0.318   | 0.256     | 4e-04            | NA                    | Hypermethylated in FP vs FN |
| cg02067983 | 0.434   | 0.170   | 0.264     | 4e-04            | WNT1                  | Hypermethylated in FP vs FN |
| cg24753662 | 0.744   | 0.366   | 0.379     | 4e-04            | NA                    | Hypermethylated in FP vs FN |
| cg02896835 | 0.782   | 0.475   | 0.308     | 4e-04            | NA                    | Hypermethylated in FP vs FN |
| cg01572940 | 0.714   | 0.403   | 0.311     | 4e-04            | NA                    | Hypermethylated in FP vs FN |
| cg08371391 | 0.563   | 0.281   | 0.282     | 4e-04            | NA                    | Hypermethylated in FP vs FN |
| cg24550112 | 0.721   | 0.450   | 0.271     | 5e-04            | NA                    | Hypermethylated in FP vs FN |
| cg25241559 | 0.623   | 0.315   | 0.308     | 5e-04            | NA                    | Hypermethylated in FP vs FN |
| cg22061523 | 0.500   | 0.242   | 0.257     | 5e-04            | TK1                   | Hypermethylated in FP vs FN |
| cg14606256 | 0.664   | 0.406   | 0.258     | 5e-04            | NA                    | Hypermethylated in FP vs FN |
| cg12363903 | 0.794   | 0.510   | 0.284     | 5e-04            | NA                    | Hypermethylated in FP vs FN |
| cg12954755 | 0.702   | 0.421   | 0.280     | 5e-04            | NA                    | Hypermethylated in FP vs FN |
| cg07534823 | 0.640   | 0.387   | 0.252     | 5e-04            | NA                    | Hypermethylated in FP vs FN |
| cg11459266 | 0.670   | 0.371   | 0.299     | 5e-04            | NA                    | Hypermethylated in FP vs FN |
| cg03924566 | 0.629   | 0.337   | 0.292     | 5e-04            | BAI1                  | Hypermethylated in FP vs FN |
| cg11449860 | 0.555   | 0.296   | 0.260     | 5e-04            | NA                    | Hypermethylated in FP vs FN |
| cg01829817 | 0.793   | 0.532   | 0.261     | 5e-04            | NA                    | Hypermethylated in FP vs FN |
| cg13037201 | 0.614   | 0.292   | 0.322     | 5e-04            | NA                    | Hypermethylated in FP vs FN |
| cg07176589 | 0.628   | 0.373   | 0.256     | 5e-04            | LOC100192378          | Hypermethylated in FP vs FN |
| cg27448433 | 0.797   | 0.530   | 0.267     | 5e-04            | CREB5                 | Hypermethylated in FP vs FN |

### Supplementary Table 7 (continued)

| Probe      | FP.mean | FN.mean | Mean.diff | Adjusted.P.value | Promoter.related.gene | Category                    |
|------------|---------|---------|-----------|------------------|-----------------------|-----------------------------|
| cg21272279 | 0.534   | 0.243   | 0.291     | 5e-04            | NA                    | Hypermethylated in FP vs FN |
| cg05854694 | 0.518   | 0.233   | 0.286     | 5e-04            | NA                    | Hypermethylated in FP vs FN |
| cg13966557 | 0.537   | 0.267   | 0.270     | 5e-04            | NA                    | Hypermethylated in FP vs FN |
| cg07688604 | 0.624   | 0.285   | 0.338     | 5e-04            | FBRSL1                | Hypermethylated in FP vs FN |
| cg00515954 | 0.803   | 0.540   | 0.263     | 5e-04            | ANKS1B                | Hypermethylated in FP vs FN |
| cg17995197 | 0.486   | 0.225   | 0.261     | 5e-04            | NA                    | Hypermethylated in FP vs FN |
| cg05516295 | 0.758   | 0.492   | 0.266     | 5e-04            | NA                    | Hypermethylated in FP vs FN |
| cg00597687 | 0.802   | 0.549   | 0.253     | 5e-04            | NA                    | Hypermethylated in FP vs FN |
| cg05972792 | 0.795   | 0.524   | 0.271     | 5e-04            | NA                    | Hypermethylated in FP vs FN |
| cg13809441 | 0.732   | 0.440   | 0.292     | 5e-04            | NA                    | Hypermethylated in FP vs FN |
| cg15973314 | 0.763   | 0.507   | 0.256     | 5e-04            | NA                    | Hypermethylated in FP vs FN |
| cg05726195 | 0.687   | 0.428   | 0.258     | 5e-04            | NA                    | Hypermethylated in FP vs FN |
| cg15312943 | 0.671   | 0.420   | 0.252     | 5e-04            | NA                    | Hypermethylated in FP vs FN |
| cg13341668 | 0.766   | 0.491   | 0.275     | 5e-04            | HYAL2                 | Hypermethylated in FP vs FN |
| cg05895665 | 0.685   | 0.429   | 0.256     | 5e-04            | NA                    | Hypermethylated in FP vs FN |
| cg12913879 | 0.637   | 0.359   | 0.278     | 5e-04            | NA                    | Hypermethylated in FP vs FN |
| cg00864474 | 0.443   | 0.175   | 0.268     | 5e-04            | NA                    | Hypermethylated in FP vs FN |
| cg20653144 | 0.681   | 0.425   | 0.257     | 5e-04            | NA                    | Hypermethylated in FP vs FN |
| cg09084391 | 0.648   | 0.395   | 0.253     | 5e-04            | NA                    | Hypermethylated in FP vs FN |
| cg06114334 | 0.740   | 0.485   | 0.255     | 5e-04            | NA                    | Hypermethylated in FP vs FN |
| cg26129110 | 0.771   | 0.452   | 0.319     | 5e-04            | NA                    | Hypermethylated in FP vs FN |
| cg17646820 | 0.803   | 0.505   | 0.298     | 5e-04            | NA                    | Hypermethylated in FP vs FN |
| cg19917565 | 0.645   | 0.367   | 0.279     | 5e-04            | NA                    | Hypermethylated in FP vs FN |
| cg23243400 | 0.752   | 0.474   | 0.277     | 5e-04            | NA                    | Hypermethylated in FP vs FN |
| cg06784545 | 0.598   | 0.327   | 0.271     | 5e-04            | NA                    | Hypermethylated in FP vs FN |



### Supplementary Table 7 (continued)

| Probe      | FP.mean | FN.mean | Mean.diff | Adjusted.P.value | Promoter.related.gene | Category                    |
|------------|---------|---------|-----------|------------------|-----------------------|-----------------------------|
| cg24847636 | 0.715   | 0.408   | 0.307     | 5e-04            | NA                    | Hypermethylated in FP vs FN |
| cg08878567 | 0.634   | 0.371   | 0.263     | 5e-04            | NA                    | Hypermethylated in FP vs FN |
| cg06452769 | 0.720   | 0.408   | 0.312     | 5e-04            | PLEC1                 | Hypermethylated in FP vs FN |
| cg02767177 | 0.551   | 0.277   | 0.274     | 5e-04            | NA                    | Hypermethylated in FP vs FN |
| cg03736795 | 0.769   | 0.494   | 0.275     | 5e-04            | NA                    | Hypermethylated in FP vs FN |
| cg09506081 | 0.682   | 0.360   | 0.322     | 5e-04            | NA                    | Hypermethylated in FP vs FN |
| cg08006625 | 0.498   | 0.224   | 0.273     | 5e-04            | NA                    | Hypermethylated in FP vs FN |
| cg16506378 | 0.743   | 0.476   | 0.267     | 5e-04            | NA                    | Hypermethylated in FP vs FN |
| cg03221054 | 0.794   | 0.537   | 0.258     | 5e-04            | MIR653_MIR489         | Hypermethylated in FP vs FN |
| cg17183432 | 0.552   | 0.211   | 0.341     | 5e-04            | NA                    | Hypermethylated in FP vs FN |
| cg07124173 | 0.356   | 0.086   | 0.270     | 5e-04            | EIF4EBP3              | Hypermethylated in FP vs FN |
| cg11201447 | 0.575   | 0.289   | 0.286     | 5e-04            | MIR1204               | Hypermethylated in FP vs FN |
| cg00107772 | 0.769   | 0.446   | 0.323     | 5e-04            | NA                    | Hypermethylated in FP vs FN |
| cg06585708 | 0.568   | 0.248   | 0.320     | 5e-04            | NA                    | Hypermethylated in FP vs FN |
| cg12351126 | 0.400   | 0.144   | 0.256     | 5e-04            | GLIPR1L2              | Hypermethylated in FP vs FN |
| cg22125805 | 0.516   | 0.208   | 0.307     | 5e-04            | NA                    | Hypermethylated in FP vs FN |
| cg26504021 | 0.670   | 0.397   | 0.273     | 5e-04            | IRX2                  | Hypermethylated in FP vs FN |
| cg27139956 | 0.708   | 0.454   | 0.255     | 5e-04            | NA                    | Hypermethylated in FP vs FN |
| cg14844118 | 0.746   | 0.493   | 0.254     | 5e-04            | NA                    | Hypermethylated in FP vs FN |
| cg01561304 | 0.573   | 0.309   | 0.264     | 5e-04            | NA                    | Hypermethylated in FP vs FN |
| cg25694349 | 0.680   | 0.309   | 0.371     | 6e-04            | FBRSL1                | Hypermethylated in FP vs FN |
| cg16717713 | 0.487   | 0.216   | 0.271     | 6e-04            | CCDC85C               | Hypermethylated in FP vs FN |
| cg13204568 | 0.606   | 0.315   | 0.290     | 6e-04            | DHRS3                 | Hypermethylated in FP vs FN |
| cg10368049 | 0.527   | 0.270   | 0.257     | 6e-04            | COL1A2                | Hypermethylated in FP vs FN |
| cg22459755 | 0.371   | 0.119   | 0.252     | 6e-04            | NA                    | Hypermethylated in FP vs FN |

### Supplementary Table 7 (continued)

| Probe      | FP.mean | FN.mean | Mean.diff | Adjusted.P.value | Promoter.related.gene | Category                    |
|------------|---------|---------|-----------|------------------|-----------------------|-----------------------------|
| cg00351324 | 0.367   | 0.114   | 0.253     | 6e-04            | GSTO2                 | Hypermethylated in FP vs FN |
| cg10858480 | 0.515   | 0.254   | 0.261     | 6e-04            | NA                    | Hypermethylated in FP vs FN |
| cg15552158 | 0.704   | 0.424   | 0.280     | 6e-04            | NA                    | Hypermethylated in FP vs FN |
| cg10304922 | 0.670   | 0.336   | 0.334     | 6e-04            | FBRSL1                | Hypermethylated in FP vs FN |
| cg02099572 | 0.660   | 0.363   | 0.297     | 6e-04            | NA                    | Hypermethylated in FP vs FN |
| cg09863247 | 0.569   | 0.273   | 0.296     | 6e-04            | NA                    | Hypermethylated in FP vs FN |
| cg27298940 | 0.719   | 0.459   | 0.260     | 6e-04            | NA                    | Hypermethylated in FP vs FN |
| cg22704068 | 0.463   | 0.197   | 0.266     | 6e-04            | LOC388588             | Hypermethylated in FP vs FN |
| cg02185248 | 0.708   | 0.449   | 0.259     | 6e-04            | NA                    | Hypermethylated in FP vs FN |
| cg11905611 | 0.648   | 0.338   | 0.309     | 6e-04            | PLBD1                 | Hypermethylated in FP vs FN |
| cg14695492 | 0.669   | 0.400   | 0.269     | 6e-04            | BAI1                  | Hypermethylated in FP vs FN |
| cg08886020 | 0.724   | 0.466   | 0.258     | 6e-04            | NA                    | Hypermethylated in FP vs FN |
| cg04440717 | 0.844   | 0.544   | 0.300     | 6e-04            | NA                    | Hypermethylated in FP vs FN |
| cg02116953 | 0.828   | 0.518   | 0.310     | 6e-04            | NA                    | Hypermethylated in FP vs FN |
| cg02772995 | 0.648   | 0.385   | 0.263     | 6e-04            | NA                    | Hypermethylated in FP vs FN |
| cg22610655 | 0.812   | 0.532   | 0.280     | 6e-04            | NA                    | Hypermethylated in FP vs FN |
| cg08466792 | 0.692   | 0.294   | 0.398     | 6e-04            | NA                    | Hypermethylated in FP vs FN |
| cg13709211 | 0.688   | 0.402   | 0.286     | 6e-04            | NA                    | Hypermethylated in FP vs FN |
| cg02086801 | 0.748   | 0.497   | 0.252     | 6e-04            | NA                    | Hypermethylated in FP vs FN |
| cg17871403 | 0.790   | 0.538   | 0.252     | 6e-04            | NA                    | Hypermethylated in FP vs FN |
| cg05253110 | 0.659   | 0.393   | 0.266     | 6e-04            | NA                    | Hypermethylated in FP vs FN |
| cg23932658 | 0.645   | 0.358   | 0.287     | 6e-04            | NA                    | Hypermethylated in FP vs FN |
| cg03993109 | 0.667   | 0.403   | 0.264     | 6e-04            | NA                    | Hypermethylated in FP vs FN |
| cg19786983 | 0.726   | 0.463   | 0.262     | 6e-04            | NA                    | Hypermethylated in FP vs FN |
| cg10270430 | 0.679   | 0.425   | 0.254     | 7e-04            | NA                    | Hypermethylated in FP vs FN |

### Supplementary Table 7 (continued)

| Probe      | FP.mean | FN.mean | Mean.diff | Adjusted.P.value | Promoter.related.gene | Category                    |
|------------|---------|---------|-----------|------------------|-----------------------|-----------------------------|
| cg10392840 | 0.573   | 0.252   | 0.321     | 7e-04            | ADAR                  | Hypermethylated in FP vs FN |
| cg00223136 | 0.819   | 0.566   | 0.253     | 7e-04            | NA                    | Hypermethylated in FP vs FN |
| cg22078710 | 0.506   | 0.237   | 0.270     | 7e-04            | NA                    | Hypermethylated in FP vs FN |
| cg04502985 | 0.714   | 0.411   | 0.303     | 7e-04            | NA                    | Hypermethylated in FP vs FN |
| cg06430029 | 0.736   | 0.470   | 0.266     | 7e-04            | NA                    | Hypermethylated in FP vs FN |
| cg10908116 | 0.744   | 0.473   | 0.271     | 7e-04            | NA                    | Hypermethylated in FP vs FN |
| cg05516327 | 0.703   | 0.444   | 0.259     | 7e-04            | NA                    | Hypermethylated in FP vs FN |
| cg14216068 | 0.638   | 0.311   | 0.327     | 7e-04            | NA                    | Hypermethylated in FP vs FN |
| cg25385412 | 0.470   | 0.184   | 0.286     | 7e-04            | NA                    | Hypermethylated in FP vs FN |
| cg21817179 | 0.721   | 0.464   | 0.257     | 7e-04            | SOSTDC1               | Hypermethylated in FP vs FN |
| cg03420866 | 0.748   | 0.485   | 0.262     | 7e-04            | NA                    | Hypermethylated in FP vs FN |
| cg07919108 | 0.533   | 0.178   | 0.354     | 7e-04            | NA                    | Hypermethylated in FP vs FN |
| cg01884681 | 0.711   | 0.433   | 0.278     | 7e-04            | NA                    | Hypermethylated in FP vs FN |
| cg17650747 | 0.635   | 0.364   | 0.272     | 7e-04            | NA                    | Hypermethylated in FP vs FN |
| cg19033654 | 0.564   | 0.286   | 0.278     | 7e-04            | FLOT1                 | Hypermethylated in FP vs FN |
| cg13289884 | 0.602   | 0.340   | 0.262     | 7e-04            | NA                    | Hypermethylated in FP vs FN |
| cg11841239 | 0.548   | 0.298   | 0.250     | 7e-04            | NA                    | Hypermethylated in FP vs FN |
| cg09404376 | 0.663   | 0.395   | 0.269     | 7e-04            | SGK1                  | Hypermethylated in FP vs FN |
| cg18108818 | 0.685   | 0.392   | 0.293     | 7e-04            | NA                    | Hypermethylated in FP vs FN |
| cg04012931 | 0.612   | 0.326   | 0.286     | 7e-04            | FLOT1                 | Hypermethylated in FP vs FN |
| cg19232382 | 0.728   | 0.471   | 0.257     | 7e-04            | NA                    | Hypermethylated in FP vs FN |
| cg20910408 | 0.707   | 0.377   | 0.330     | 7e-04            | NA                    | Hypermethylated in FP vs FN |
| cg01510990 | 0.660   | 0.402   | 0.258     | 7e-04            | NA                    | Hypermethylated in FP vs FN |
| cg15859390 | 0.653   | 0.389   | 0.264     | 7e-04            | NA                    | Hypermethylated in FP vs FN |
| cg10641714 | 0.624   | 0.360   | 0.264     | 7e-04            | NA                    | Hypermethylated in FP vs FN |

### Supplementary Table 7 (continued)

| Probe      | FP.mean | FN.mean | Mean.diff | Adjusted.P.value | Promoter.related.gene | Category                    |
|------------|---------|---------|-----------|------------------|-----------------------|-----------------------------|
| cg00934883 | 0.536   | 0.277   | 0.260     | 7e-04            | NA                    | Hypermethylated in FP vs FN |
| cg19863655 | 0.759   | 0.407   | 0.353     | 7e-04            | C13orf33              | Hypermethylated in FP vs FN |
| cg10868277 | 0.716   | 0.418   | 0.298     | 7e-04            | NA                    | Hypermethylated in FP vs FN |
| cg19978181 | 0.769   | 0.474   | 0.295     | 7e-04            | NA                    | Hypermethylated in FP vs FN |
| cg25398924 | 0.731   | 0.446   | 0.285     | 7e-04            | NA                    | Hypermethylated in FP vs FN |
| cg05981335 | 0.722   | 0.434   | 0.288     | 7e-04            | NA                    | Hypermethylated in FP vs FN |
| cg12898868 | 0.713   | 0.457   | 0.256     | 7e-04            | IQCF5                 | Hypermethylated in FP vs FN |
| cg16644023 | 0.725   | 0.465   | 0.260     | 7e-04            | HOXA3                 | Hypermethylated in FP vs FN |
| cg04724735 | 0.511   | 0.216   | 0.295     | 7e-04            | NA                    | Hypermethylated in FP vs FN |
| cg03131729 | 0.613   | 0.359   | 0.254     | 8e-04            | NA                    | Hypermethylated in FP vs FN |
| cg23511824 | 0.660   | 0.401   | 0.259     | 8e-04            | NA                    | Hypermethylated in FP vs FN |
| cg20541191 | 0.609   | 0.356   | 0.253     | 8e-04            | NRG1                  | Hypermethylated in FP vs FN |
| cg01521274 | 0.607   | 0.335   | 0.272     | 8e-04            | NA                    | Hypermethylated in FP vs FN |
| cg24544490 | 0.769   | 0.441   | 0.328     | 8e-04            | NA                    | Hypermethylated in FP vs FN |
| cg05617413 | 0.653   | 0.310   | 0.344     | 8e-04            | FBRSL1                | Hypermethylated in FP vs FN |
| cg06285590 | 0.548   | 0.219   | 0.329     | 8e-04            | NA                    | Hypermethylated in FP vs FN |
| cg02658690 | 0.773   | 0.495   | 0.278     | 8e-04            | NA                    | Hypermethylated in FP vs FN |
| cg08687386 | 0.543   | 0.256   | 0.287     | 8e-04            | FLOT1                 | Hypermethylated in FP vs FN |
| cg08074820 | 0.553   | 0.212   | 0.341     | 8e-04            | NA                    | Hypermethylated in FP vs FN |
| cg13714026 | 0.661   | 0.397   | 0.264     | 8e-04            | NA                    | Hypermethylated in FP vs FN |
| cg05771342 | 0.683   | 0.428   | 0.255     | 8e-04            | MRGPRF                | Hypermethylated in FP vs FN |
| cg02276807 | 0.634   | 0.308   | 0.326     | 8e-04            | NA                    | Hypermethylated in FP vs FN |
| cg02164129 | 0.415   | 0.100   | 0.314     | 8e-04            | NA                    | Hypermethylated in FP vs FN |
| cg15083233 | 0.622   | 0.293   | 0.330     | 8e-04            | AKAP2                 | Hypermethylated in FP vs FN |
| cg06192497 | 0.519   | 0.225   | 0.295     | 8e-04            | LOC100132215          | Hypermethylated in FP vs FN |

### Supplementary Table 7 (continued)

| Probe      | FP.mean | FN.mean | Mean.diff | Adjusted.P.value | Promoter.related.gene | Category                    |
|------------|---------|---------|-----------|------------------|-----------------------|-----------------------------|
| cg05907933 | 0.770   | 0.484   | 0.286     | 8e-04            | NA                    | Hypermethylated in FP vs FN |
| cg25642234 | 0.636   | 0.358   | 0.278     | 8e-04            | PLBD1                 | Hypermethylated in FP vs FN |
| cg26327666 | 0.719   | 0.449   | 0.270     | 8e-04            | NA                    | Hypermethylated in FP vs FN |
| cg02902865 | 0.621   | 0.329   | 0.292     | 8e-04            | DHRS3                 | Hypermethylated in FP vs FN |
| cg15974673 | 0.598   | 0.309   | 0.289     | 8e-04            | NA                    | Hypermethylated in FP vs FN |
| cg00620733 | 0.604   | 0.333   | 0.271     | 8e-04            | NA                    | Hypermethylated in FP vs FN |
| cg15962744 | 0.698   | 0.445   | 0.254     | 8e-04            | NA                    | Hypermethylated in FP vs FN |
| cg05136737 | 0.546   | 0.275   | 0.271     | 8e-04            | NA                    | Hypermethylated in FP vs FN |
| cg26413942 | 0.536   | 0.285   | 0.250     | 8e-04            | ZNF608                | Hypermethylated in FP vs FN |
| cg27303211 | 0.651   | 0.396   | 0.255     | 8e-04            | NA                    | Hypermethylated in FP vs FN |
| cg11397854 | 0.464   | 0.166   | 0.298     | 8e-04            | NA                    | Hypermethylated in FP vs FN |
| cg02626129 | 0.668   | 0.330   | 0.338     | 8e-04            | C13orf33              | Hypermethylated in FP vs FN |
| cg05874732 | 0.407   | 0.147   | 0.260     | 8e-04            | NA                    | Hypermethylated in FP vs FN |
| cg18126442 | 0.532   | 0.241   | 0.291     | 8e-04            | LOC100132215          | Hypermethylated in FP vs FN |
| cg18877525 | 0.705   | 0.428   | 0.276     | 8e-04            | NA                    | Hypermethylated in FP vs FN |
| cg00353773 | 0.583   | 0.283   | 0.299     | 8e-04            | CXCL12                | Hypermethylated in FP vs FN |
| cg23166865 | 0.468   | 0.204   | 0.264     | 8e-04            | NA                    | Hypermethylated in FP vs FN |
| cg11699334 | 0.550   | 0.292   | 0.259     | 8e-04            | NA                    | Hypermethylated in FP vs FN |
| cg22173752 | 0.431   | 0.162   | 0.269     | 8e-04            | TICAM2                | Hypermethylated in FP vs FN |
| cg14076239 | 0.648   | 0.384   | 0.265     | 8e-04            | NA                    | Hypermethylated in FP vs FN |
| cg09426383 | 0.497   | 0.233   | 0.264     | 8e-04            | NA                    | Hypermethylated in FP vs FN |
| cg06952099 | 0.637   | 0.370   | 0.267     | 8e-04            | NA                    | Hypermethylated in FP vs FN |
| cg00702647 | 0.688   | 0.405   | 0.283     | 9e-04            | NA                    | Hypermethylated in FP vs FN |
| cg23508813 | 0.621   | 0.371   | 0.250     | 9e-04            | NA                    | Hypermethylated in FP vs FN |
| cg16210248 | 0.710   | 0.435   | 0.276     | 9e-04            | NA                    | Hypermethylated in FP vs FN |

### Supplementary Table 7 (continued)

| Probe      | FP.mean | FN.mean | Mean.diff | Adjusted.P.value | Promoter.related.gene | Category                    |
|------------|---------|---------|-----------|------------------|-----------------------|-----------------------------|
| cg00314029 | 0.639   | 0.386   | 0.253     | 9e-04            | NA                    | Hypermethylated in FP vs FN |
| cg05361489 | 0.613   | 0.346   | 0.266     | 9e-04            | NA                    | Hypermethylated in FP vs FN |
| cg21983520 | 0.654   | 0.390   | 0.264     | 9e-04            | NA                    | Hypermethylated in FP vs FN |
| cg23553912 | 0.809   | 0.546   | 0.262     | 9e-04            | NA                    | Hypermethylated in FP vs FN |
| cg15920743 | 0.579   | 0.233   | 0.347     | 9e-04            | NA                    | Hypermethylated in FP vs FN |
| cg07132492 | 0.806   | 0.554   | 0.252     | 9e-04            | NA                    | Hypermethylated in FP vs FN |
| cg13619891 | 0.714   | 0.460   | 0.254     | 9e-04            | NA                    | Hypermethylated in FP vs FN |
| cg18751141 | 0.772   | 0.474   | 0.299     | 9e-04            | NA                    | Hypermethylated in FP vs FN |
| cg14576436 | 0.767   | 0.491   | 0.276     | 9e-04            | NA                    | Hypermethylated in FP vs FN |
| cg25923609 | 0.806   | 0.481   | 0.325     | 9e-04            | NA                    | Hypermethylated in FP vs FN |
| cg15679064 | 0.576   | 0.291   | 0.285     | 9e-04            | NA                    | Hypermethylated in FP vs FN |
| cg20300032 | 0.668   | 0.416   | 0.252     | 9e-04            | NA                    | Hypermethylated in FP vs FN |
| cg00445126 | 0.477   | 0.195   | 0.281     | 9e-04            | LOC100132215          | Hypermethylated in FP vs FN |
| cg03479694 | 0.749   | 0.473   | 0.276     | 9e-04            | NA                    | Hypermethylated in FP vs FN |
| cg23706497 | 0.486   | 0.228   | 0.258     | 9e-04            | OTX2                  | Hypermethylated in FP vs FN |
| cg17666539 | 0.659   | 0.299   | 0.359     | 1e-03            | NA                    | Hypermethylated in FP vs FN |
| cg10409799 | 0.562   | 0.195   | 0.367     | 1e-03            | ADAR                  | Hypermethylated in FP vs FN |
| cg02637537 | 0.855   | 0.594   | 0.261     | 1e-03            | NA                    | Hypermethylated in FP vs FN |
| cg15355952 | 0.678   | 0.414   | 0.264     | 1e-03            | NA                    | Hypermethylated in FP vs FN |
| cg08170787 | 0.718   | 0.452   | 0.266     | 1e-03            | RUSC1                 | Hypermethylated in FP vs FN |
| cg05278650 | 0.384   | 0.090   | 0.294     | 1e-03            | IQSEC1                | Hypermethylated in FP vs FN |
| cg13672747 | 0.631   | 0.352   | 0.279     | 1e-03            | NA                    | Hypermethylated in FP vs FN |
| cg07117219 | 0.481   | 0.202   | 0.279     | 1e-03            | NA                    | Hypermethylated in FP vs FN |
| cg05257086 | 0.667   | 0.372   | 0.295     | 1e-03            | NA                    | Hypermethylated in FP vs FN |
| cg10095954 | 0.755   | 0.486   | 0.269     | 1e-03            | NA                    | Hypermethylated in FP vs FN |

### Supplementary Table 7 (continued)

| Probe      | FP.mean | FN.mean | Mean.diff | Adjusted.P.value | Promoter.related.gene | Category                    |
|------------|---------|---------|-----------|------------------|-----------------------|-----------------------------|
| cg02348751 | 0.804   | 0.500   | 0.304     | 0.001            | NA                    | Hypermethylated in FP vs FN |
| cg26124968 | 0.729   | 0.409   | 0.321     | 0.001            | NA                    | Hypermethylated in FP vs FN |
| cg21442003 | 0.656   | 0.384   | 0.272     | 0.001            | ACVR1C                | Hypermethylated in FP vs FN |
| cg20709110 | 0.657   | 0.337   | 0.320     | 0.001            | NA                    | Hypermethylated in FP vs FN |
| cg27317046 | 0.501   | 0.211   | 0.290     | 0.001            | NA                    | Hypermethylated in FP vs FN |
| cg18309286 | 0.402   | 0.138   | 0.264     | 0.001            | NA                    | Hypermethylated in FP vs FN |
| cg24395452 | 0.533   | 0.248   | 0.284     | 0.001            | NA                    | Hypermethylated in FP vs FN |
| cg02639927 | 0.621   | 0.294   | 0.327     | 0.001            | NA                    | Hypermethylated in FP vs FN |
| cg10544031 | 0.705   | 0.442   | 0.263     | 0.001            | PAX3                  | Hypermethylated in FP vs FN |
| cg04982308 | 0.628   | 0.303   | 0.325     | 0.001            | NA                    | Hypermethylated in FP vs FN |
| cg21519787 | 0.682   | 0.385   | 0.297     | 0.001            | NA                    | Hypermethylated in FP vs FN |
| cg09147068 | 0.746   | 0.494   | 0.252     | 0.001            | NA                    | Hypermethylated in FP vs FN |
| cg03359508 | 0.527   | 0.241   | 0.287     | 0.001            | NA                    | Hypermethylated in FP vs FN |
| cg00030422 | 0.470   | 0.201   | 0.269     | 0.001            | DLEC1                 | Hypermethylated in FP vs FN |
| cg27245348 | 0.658   | 0.403   | 0.255     | 0.001            | NA                    | Hypermethylated in FP vs FN |
| cg12297440 | 0.832   | 0.574   | 0.258     | 0.001            | NA                    | Hypermethylated in FP vs FN |
| cg01554060 | 0.487   | 0.205   | 0.282     | 0.001            | TICAM2                | Hypermethylated in FP vs FN |
| cg10939691 | 0.494   | 0.213   | 0.281     | 0.001            | NA                    | Hypermethylated in FP vs FN |
| cg26861732 | 0.826   | 0.536   | 0.291     | 0.001            | NA                    | Hypermethylated in FP vs FN |
| cg20952901 | 0.756   | 0.417   | 0.339     | 0.001            | NA                    | Hypermethylated in FP vs FN |
| cg13792579 | 0.559   | 0.261   | 0.298     | 0.001            | NA                    | Hypermethylated in FP vs FN |
| cg04498198 | 0.453   | 0.191   | 0.262     | 0.001            | NA                    | Hypermethylated in FP vs FN |
| cg16251357 | 0.729   | 0.427   | 0.302     | 0.001            | PRAC                  | Hypermethylated in FP vs FN |
| cg25287257 | 0.440   | 0.150   | 0.290     | 0.001            | NA                    | Hypermethylated in FP vs FN |
| cg09380000 | 0.836   | 0.586   | 0.250     | 0.001            | NA                    | Hypermethylated in FP vs FN |

### Supplementary Table 7 (continued)

| Probe      | FP.mean | FN.mean | Mean.diff | Adjusted.P.value | Promoter.related.gene | Category                    |
|------------|---------|---------|-----------|------------------|-----------------------|-----------------------------|
| cg23681745 | 0.769   | 0.431   | 0.338     | 0.001            | NA                    | Hypermethylated in FP vs FN |
| cg00409684 | 0.517   | 0.238   | 0.279     | 0.001            | NA                    | Hypermethylated in FP vs FN |
| cg16115627 | 0.698   | 0.392   | 0.305     | 0.001            | NA                    | Hypermethylated in FP vs FN |
| cg25145165 | 0.724   | 0.462   | 0.262     | 0.001            | NA                    | Hypermethylated in FP vs FN |
| cg12671090 | 0.736   | 0.476   | 0.261     | 0.001            | RPL13AP17             | Hypermethylated in FP vs FN |
| cg27395066 | 0.760   | 0.490   | 0.270     | 0.001            | NA                    | Hypermethylated in FP vs FN |
| cg19945931 | 0.668   | 0.350   | 0.318     | 0.001            | NA                    | Hypermethylated in FP vs FN |
| cg06154903 | 0.734   | 0.467   | 0.267     | 0.001            | NA                    | Hypermethylated in FP vs FN |
| cg04237822 | 0.667   | 0.378   | 0.289     | 0.001            | NA                    | Hypermethylated in FP vs FN |
| cg20733436 | 0.457   | 0.181   | 0.276     | 0.001            | NA                    | Hypermethylated in FP vs FN |
| cg23881099 | 0.688   | 0.436   | 0.253     | 0.001            | NA                    | Hypermethylated in FP vs FN |
| cg08327690 | 0.382   | 0.124   | 0.258     | 0.001            | NA                    | Hypermethylated in FP vs FN |
| cg18527241 | 0.697   | 0.441   | 0.257     | 0.001            | ATXN7L1               | Hypermethylated in FP vs FN |
| cg01598421 | 0.637   | 0.372   | 0.264     | 0.001            | NA                    | Hypermethylated in FP vs FN |
| cg16999254 | 0.730   | 0.404   | 0.326     | 0.001            | NA                    | Hypermethylated in FP vs FN |
| cg03477112 | 0.632   | 0.359   | 0.274     | 0.001            | NA                    | Hypermethylated in FP vs FN |
| cg06254440 | 0.806   | 0.526   | 0.280     | 0.001            | NA                    | Hypermethylated in FP vs FN |
| cg01152056 | 0.662   | 0.409   | 0.254     | 0.001            | NA                    | Hypermethylated in FP vs FN |
| cg14234406 | 0.648   | 0.390   | 0.259     | 0.001            | PLEC1                 | Hypermethylated in FP vs FN |
| cg21880765 | 0.652   | 0.377   | 0.275     | 0.001            | NA                    | Hypermethylated in FP vs FN |
| cg18378551 | 0.603   | 0.329   | 0.274     | 0.001            | NA                    | Hypermethylated in FP vs FN |
| cg08535928 | 0.654   | 0.372   | 0.281     | 0.001            | LOC149134             | Hypermethylated in FP vs FN |
| cg23961466 | 0.556   | 0.276   | 0.281     | 0.001            | NA                    | Hypermethylated in FP vs FN |
| cg08657654 | 0.780   | 0.491   | 0.289     | 0.001            | NA                    | Hypermethylated in FP vs FN |
| cg09235583 | 0.589   | 0.287   | 0.301     | 0.001            | FLOT1                 | Hypermethylated in FP vs FN |



### Supplementary Table 7 (continued)

| Probe      | FP.mean | FN.mean | Mean.diff | Adjusted.P.value | Promoter.related.gene | Category                    |
|------------|---------|---------|-----------|------------------|-----------------------|-----------------------------|
| cg25104512 | 0.833   | 0.528   | 0.304     | 0.001            | ALS2CL                | Hypermethylated in FP vs FN |
| cg05813818 | 0.690   | 0.425   | 0.265     | 0.001            | NA                    | Hypermethylated in FP vs FN |
| cg17266581 | 0.646   | 0.324   | 0.322     | 0.001            | NA                    | Hypermethylated in FP vs FN |
| cg23881725 | 0.645   | 0.381   | 0.263     | 0.001            | DLEC1                 | Hypermethylated in FP vs FN |
| cg22764044 | 0.564   | 0.277   | 0.287     | 0.001            | RUFY1                 | Hypermethylated in FP vs FN |
| cg01305186 | 0.630   | 0.311   | 0.319     | 0.001            | NA                    | Hypermethylated in FP vs FN |
| cg02633729 | 0.521   | 0.237   | 0.283     | 0.001            | NA                    | Hypermethylated in FP vs FN |
| cg16701059 | 0.612   | 0.329   | 0.283     | 0.001            | NA                    | Hypermethylated in FP vs FN |
| cg01484156 | 0.623   | 0.361   | 0.262     | 0.001            | NA                    | Hypermethylated in FP vs FN |
| cg05109569 | 0.608   | 0.350   | 0.258     | 0.001            | NA                    | Hypermethylated in FP vs FN |
| cg13910860 | 0.376   | 0.087   | 0.290     | 0.001            | NA                    | Hypermethylated in FP vs FN |
| cg24220279 | 0.457   | 0.185   | 0.272     | 0.001            | NA                    | Hypermethylated in FP vs FN |
| cg03096126 | 0.494   | 0.221   | 0.273     | 0.001            | NA                    | Hypermethylated in FP vs FN |
| cg19284211 | 0.798   | 0.508   | 0.290     | 0.001            | INSM1                 | Hypermethylated in FP vs FN |
| cg19878200 | 0.644   | 0.392   | 0.252     | 0.001            | NA                    | Hypermethylated in FP vs FN |
| cg05929675 | 0.774   | 0.500   | 0.274     | 0.001            | CREB5                 | Hypermethylated in FP vs FN |
| cg21340999 | 0.770   | 0.498   | 0.272     | 0.001            | NA                    | Hypermethylated in FP vs FN |
| cg13500072 | 0.853   | 0.579   | 0.274     | 0.001            | NA                    | Hypermethylated in FP vs FN |
| cg14730102 | 0.643   | 0.363   | 0.280     | 0.001            | NA                    | Hypermethylated in FP vs FN |
| cg20962117 | 0.690   | 0.415   | 0.275     | 0.001            | NA                    | Hypermethylated in FP vs FN |
| cg17865555 | 0.713   | 0.432   | 0.281     | 0.001            | NA                    | Hypermethylated in FP vs FN |
| cg06775523 | 0.653   | 0.387   | 0.266     | 0.001            | NA                    | Hypermethylated in FP vs FN |
| cg17737621 | 0.747   | 0.432   | 0.316     | 0.001            | NA                    | Hypermethylated in FP vs FN |
| cg00073837 | 0.630   | 0.332   | 0.298     | 0.001            | NA                    | Hypermethylated in FP vs FN |
| cg27427514 | 0.701   | 0.379   | 0.323     | 0.002            | NA                    | Hypermethylated in FP vs FN |

### Supplementary Table 7 (continued)

| Probe      | FP.mean | FN.mean | Mean.diff | Adjusted.P.value | Promoter.related.gene | Category                    |
|------------|---------|---------|-----------|------------------|-----------------------|-----------------------------|
| cg06007271 | 0.558   | 0.300   | 0.258     | 0.002            | CYTL1                 | Hypermethylated in FP vs FN |
| cg23404330 | 0.640   | 0.366   | 0.274     | 0.002            | NA                    | Hypermethylated in FP vs FN |
| cg15473473 | 0.852   | 0.593   | 0.259     | 0.002            | NNAT                  | Hypermethylated in FP vs FN |
| cg00881448 | 0.771   | 0.512   | 0.259     | 0.002            | NA                    | Hypermethylated in FP vs FN |
| cg19903229 | 0.659   | 0.402   | 0.257     | 0.002            | C14orf105             | Hypermethylated in FP vs FN |
| cg20684180 | 0.657   | 0.362   | 0.295     | 0.002            | DLEC1                 | Hypermethylated in FP vs FN |
| cg10709593 | 0.719   | 0.442   | 0.277     | 0.002            | NA                    | Hypermethylated in FP vs FN |
| cg07936950 | 0.756   | 0.466   | 0.290     | 0.002            | NA                    | Hypermethylated in FP vs FN |
| cg05514909 | 0.698   | 0.410   | 0.288     | 0.002            | NA                    | Hypermethylated in FP vs FN |
| cg08542865 | 0.534   | 0.262   | 0.272     | 0.002            | SERPINB1              | Hypermethylated in FP vs FN |
| cg26718433 | 0.595   | 0.312   | 0.283     | 0.002            | CXCL12                | Hypermethylated in FP vs FN |
| cg25623768 | 0.543   | 0.256   | 0.287     | 0.002            | NA                    | Hypermethylated in FP vs FN |
| cg03355998 | 0.549   | 0.297   | 0.252     | 0.002            | ZIC4                  | Hypermethylated in FP vs FN |
| cg20479660 | 0.821   | 0.562   | 0.259     | 0.002            | NNAT                  | Hypermethylated in FP vs FN |
| cg00260802 | 0.609   | 0.318   | 0.291     | 0.002            | NA                    | Hypermethylated in FP vs FN |
| cg11592786 | 0.901   | 0.622   | 0.278     | 0.002            | NA                    | Hypermethylated in FP vs FN |
| cg26608693 | 0.634   | 0.367   | 0.267     | 0.002            | NA                    | Hypermethylated in FP vs FN |
| cg02554345 | 0.702   | 0.420   | 0.282     | 0.002            | NA                    | Hypermethylated in FP vs FN |
| cg21038785 | 0.580   | 0.301   | 0.279     | 0.002            | NA                    | Hypermethylated in FP vs FN |
| cg09098522 | 0.639   | 0.377   | 0.262     | 0.002            | NA                    | Hypermethylated in FP vs FN |
| cg12317414 | 0.677   | 0.379   | 0.298     | 0.002            | NA                    | Hypermethylated in FP vs FN |
| cg16024133 | 0.454   | 0.162   | 0.292     | 0.002            | NA                    | Hypermethylated in FP vs FN |
| cg01288375 | 0.702   | 0.447   | 0.255     | 0.002            | NA                    | Hypermethylated in FP vs FN |
| cg12467933 | 0.519   | 0.258   | 0.261     | 0.002            | NA                    | Hypermethylated in FP vs FN |
| cg09832443 | 0.635   | 0.381   | 0.255     | 0.002            | NA                    | Hypermethylated in FP vs FN |

### Supplementary Table 7 (continued)

| Probe      | FP.mean | FN.mean | Mean.diff | Adjusted.P.value | Promoter.related.gene | Category                    |
|------------|---------|---------|-----------|------------------|-----------------------|-----------------------------|
| cg27183188 | 0.580   | 0.300   | 0.280     | 0.002            | ALDOC                 | Hypermethylated in FP vs FN |
| cg03405260 | 0.782   | 0.513   | 0.269     | 0.002            | NA                    | Hypermethylated in FP vs FN |
| cg04441405 | 0.676   | 0.425   | 0.250     | 0.002            | NA                    | Hypermethylated in FP vs FN |
| cg07973095 | 0.600   | 0.301   | 0.299     | 0.002            | DECR2                 | Hypermethylated in FP vs FN |
| cg05636047 | 0.707   | 0.441   | 0.266     | 0.002            | NA                    | Hypermethylated in FP vs FN |
| cg23659289 | 0.735   | 0.484   | 0.251     | 0.002            | NA                    | Hypermethylated in FP vs FN |
| cg10136560 | 0.684   | 0.428   | 0.256     | 0.002            | NA                    | Hypermethylated in FP vs FN |
| cg05144067 | 0.573   | 0.284   | 0.289     | 0.002            | NA                    | Hypermethylated in FP vs FN |
| cg10927719 | 0.618   | 0.332   | 0.286     | 0.002            | CXCL12                | Hypermethylated in FP vs FN |
| cg23601030 | 0.578   | 0.328   | 0.250     | 0.002            | NA                    | Hypermethylated in FP vs FN |
| cg22682811 | 0.702   | 0.383   | 0.319     | 0.002            | NA                    | Hypermethylated in FP vs FN |
| cg12162138 | 0.634   | 0.284   | 0.350     | 0.002            | NA                    | Hypermethylated in FP vs FN |
| cg07214490 | 0.705   | 0.443   | 0.263     | 0.002            | NA                    | Hypermethylated in FP vs FN |
| cg10427452 | 0.731   | 0.476   | 0.255     | 0.002            | NA                    | Hypermethylated in FP vs FN |
| cg00186529 | 0.663   | 0.407   | 0.256     | 0.002            | NA                    | Hypermethylated in FP vs FN |
| cg17542408 | 0.671   | 0.305   | 0.367     | 0.002            | NA                    | Hypermethylated in FP vs FN |
| cg26958524 | 0.837   | 0.584   | 0.253     | 0.002            | FOXL1                 | Hypermethylated in FP vs FN |
| cg09140778 | 0.652   | 0.401   | 0.251     | 0.002            | NA                    | Hypermethylated in FP vs FN |
| cg13042918 | 0.604   | 0.339   | 0.265     | 0.002            | NA                    | Hypermethylated in FP vs FN |
| cg20935363 | 0.610   | 0.348   | 0.262     | 0.002            | NA                    | Hypermethylated in FP vs FN |
| cg03762694 | 0.596   | 0.313   | 0.282     | 0.002            | SGK1                  | Hypermethylated in FP vs FN |
| cg07789359 | 0.874   | 0.614   | 0.260     | 0.002            | NA                    | Hypermethylated in FP vs FN |
| cg27252696 | 0.380   | 0.115   | 0.264     | 0.002            | SIM1                  | Hypermethylated in FP vs FN |
| cg03061677 | 0.829   | 0.563   | 0.266     | 0.002            | NNAT                  | Hypermethylated in FP vs FN |
| cg04892182 | 0.773   | 0.504   | 0.269     | 0.002            | NA                    | Hypermethylated in FP vs FN |

### Supplementary Table 7 (continued)

| Probe      | FP.mean | FN.mean | Mean.diff | Adjusted.P.value | Promoter.related.gene | Category                    |
|------------|---------|---------|-----------|------------------|-----------------------|-----------------------------|
| cg24507266 | 0.698   | 0.380   | 0.318     | 0.002            | PLEC1                 | Hypermethylated in FP vs FN |
| cg11567001 | 0.465   | 0.157   | 0.307     | 0.002            | NA                    | Hypermethylated in FP vs FN |
| cg20826224 | 0.557   | 0.252   | 0.306     | 0.002            | NA                    | Hypermethylated in FP vs FN |
| cg04007726 | 0.616   | 0.336   | 0.281     | 0.002            | NA                    | Hypermethylated in FP vs FN |
| cg21097283 | 0.592   | 0.326   | 0.266     | 0.002            | OTP                   | Hypermethylated in FP vs FN |
| cg12232308 | 0.644   | 0.342   | 0.302     | 0.002            | FLOT1                 | Hypermethylated in FP vs FN |
| cg10651121 | 0.610   | 0.352   | 0.258     | 0.002            | NA                    | Hypermethylated in FP vs FN |
| cg26912671 | 0.760   | 0.483   | 0.277     | 0.002            | PDE4B                 | Hypermethylated in FP vs FN |
| cg13420744 | 0.729   | 0.443   | 0.286     | 0.002            | DHRS3                 | Hypermethylated in FP vs FN |
| cg09267483 | 0.519   | 0.240   | 0.280     | 0.002            | NA                    | Hypermethylated in FP vs FN |
| cg14344261 | 0.394   | 0.099   | 0.295     | 0.002            | NA                    | Hypermethylated in FP vs FN |
| cg05155840 | 0.625   | 0.362   | 0.263     | 0.002            | NA                    | Hypermethylated in FP vs FN |
| cg26026416 | 0.446   | 0.150   | 0.296     | 0.002            | NA                    | Hypermethylated in FP vs FN |
| cg06736444 | 0.748   | 0.495   | 0.253     | 0.002            | SRRM2                 | Hypermethylated in FP vs FN |
| cg27056119 | 0.488   | 0.226   | 0.261     | 0.002            | SERPINB1              | Hypermethylated in FP vs FN |
| cg04716021 | 0.526   | 0.265   | 0.261     | 0.002            | NA                    | Hypermethylated in FP vs FN |
| cg19990785 | 0.739   | 0.471   | 0.268     | 0.002            | NA                    | Hypermethylated in FP vs FN |
| cg14384158 | 0.805   | 0.499   | 0.307     | 0.002            | NA                    | Hypermethylated in FP vs FN |
| cg22344727 | 0.691   | 0.400   | 0.291     | 0.002            | NA                    | Hypermethylated in FP vs FN |
| cg17763354 | 0.684   | 0.370   | 0.314     | 0.002            | NA                    | Hypermethylated in FP vs FN |
| cg22481960 | 0.494   | 0.201   | 0.293     | 0.002            | NA                    | Hypermethylated in FP vs FN |
| cg24000241 | 0.708   | 0.457   | 0.251     | 0.002            | NA                    | Hypermethylated in FP vs FN |
| cg04652621 | 0.458   | 0.185   | 0.272     | 0.002            | NA                    | Hypermethylated in FP vs FN |
| cg13947088 | 0.774   | 0.481   | 0.293     | 0.002            | NA                    | Hypermethylated in FP vs FN |
| cg15149374 | 0.778   | 0.525   | 0.254     | 0.002            | NA                    | Hypermethylated in FP vs FN |

### Supplementary Table 7 (continued)

| Probe      | FP.mean | FN.mean | Mean.diff | Adjusted.P.value | Promoter.related.gene | Category                    |
|------------|---------|---------|-----------|------------------|-----------------------|-----------------------------|
| cg25363807 | 0.644   | 0.334   | 0.310     | 0.002            | NA                    | Hypermethylated in FP vs FN |
| cg13433250 | 0.498   | 0.232   | 0.266     | 0.002            | LOC100132215          | Hypermethylated in FP vs FN |
| cg27344587 | 0.534   | 0.228   | 0.306     | 0.002            | LOC100132215          | Hypermethylated in FP vs FN |
| cg06793867 | 0.614   | 0.303   | 0.311     | 0.002            | NA                    | Hypermethylated in FP vs FN |
| cg15027262 | 0.629   | 0.375   | 0.254     | 0.002            | SNX24                 | Hypermethylated in FP vs FN |
| cg15731180 | 0.662   | 0.410   | 0.252     | 0.002            | NA                    | Hypermethylated in FP vs FN |
| cg21120436 | 0.527   | 0.240   | 0.287     | 0.002            | NA                    | Hypermethylated in FP vs FN |
| cg12308746 | 0.743   | 0.481   | 0.263     | 0.002            | NA                    | Hypermethylated in FP vs FN |
| cg12252135 | 0.617   | 0.325   | 0.292     | 0.002            | NA                    | Hypermethylated in FP vs FN |
| cg13255282 | 0.503   | 0.229   | 0.274     | 0.002            | CYTL1                 | Hypermethylated in FP vs FN |
| cg02774523 | 0.549   | 0.276   | 0.272     | 0.002            | NA                    | Hypermethylated in FP vs FN |
| cg03727202 | 0.517   | 0.260   | 0.257     | 0.002            | NA                    | Hypermethylated in FP vs FN |
| cg19391924 | 0.746   | 0.455   | 0.291     | 0.002            | NA                    | Hypermethylated in FP vs FN |
| cg25019648 | 0.534   | 0.202   | 0.332     | 0.002            | NA                    | Hypermethylated in FP vs FN |
| cg27226920 | 0.490   | 0.185   | 0.305     | 0.002            | NA                    | Hypermethylated in FP vs FN |
| cg09013975 | 0.658   | 0.406   | 0.252     | 0.002            | NA                    | Hypermethylated in FP vs FN |
| cg21461082 | 0.669   | 0.387   | 0.281     | 0.002            | NA                    | Hypermethylated in FP vs FN |
| cg09240763 | 0.706   | 0.441   | 0.265     | 0.002            | NA                    | Hypermethylated in FP vs FN |
| cg27138293 | 0.681   | 0.415   | 0.266     | 0.002            | NA                    | Hypermethylated in FP vs FN |
| cg12614687 | 0.401   | 0.143   | 0.258     | 0.002            | NA                    | Hypermethylated in FP vs FN |
| cg06077079 | 0.697   | 0.408   | 0.289     | 0.002            | NA                    | Hypermethylated in FP vs FN |
| cg09533868 | 0.722   | 0.428   | 0.294     | 0.002            | NA                    | Hypermethylated in FP vs FN |
| cg18888655 | 0.796   | 0.460   | 0.336     | 0.002            | NA                    | Hypermethylated in FP vs FN |
| cg19725903 | 0.564   | 0.288   | 0.276     | 0.002            | PLBD1                 | Hypermethylated in FP vs FN |
| cg10958002 | 0.725   | 0.456   | 0.269     | 0.002            | TIMP4                 | Hypermethylated in FP vs FN |

### Supplementary Table 7 (continued)

| Probe      | FP.mean | FN.mean | Mean.diff | Adjusted.P.value | Promoter.related.gene | Category                    |
|------------|---------|---------|-----------|------------------|-----------------------|-----------------------------|
| cg26627956 | 0.818   | 0.503   | 0.315     | 0.002            | NA                    | Hypermethylated in FP vs FN |
| cg08470742 | 0.759   | 0.509   | 0.250     | 0.003            | NA                    | Hypermethylated in FP vs FN |
| cg20707679 | 0.396   | 0.118   | 0.279     | 0.003            | NA                    | Hypermethylated in FP vs FN |
| cg02369450 | 0.862   | 0.583   | 0.279     | 0.003            | NA                    | Hypermethylated in FP vs FN |
| cg00401745 | 0.596   | 0.342   | 0.254     | 0.003            | ARHGEF4               | Hypermethylated in FP vs FN |
| cg25689193 | 0.511   | 0.248   | 0.263     | 0.003            | NA                    | Hypermethylated in FP vs FN |
| cg15929797 | 0.778   | 0.431   | 0.347     | 0.003            | NA                    | Hypermethylated in FP vs FN |
| cg24869272 | 0.471   | 0.218   | 0.253     | 0.003            | NA                    | Hypermethylated in FP vs FN |
| cg16452866 | 0.764   | 0.503   | 0.261     | 0.003            | NA                    | Hypermethylated in FP vs FN |
| cg00031256 | 0.498   | 0.245   | 0.253     | 0.003            | SERPINB1              | Hypermethylated in FP vs FN |
| cg25074426 | 0.637   | 0.379   | 0.259     | 0.003            | NA                    | Hypermethylated in FP vs FN |
| cg17380661 | 0.379   | 0.126   | 0.253     | 0.003            | SIM1                  | Hypermethylated in FP vs FN |
| cg18523979 | 0.378   | 0.117   | 0.261     | 0.003            | IQSEC1                | Hypermethylated in FP vs FN |
| cg10120657 | 0.765   | 0.485   | 0.280     | 0.003            | NA                    | Hypermethylated in FP vs FN |
| cg13830624 | 0.477   | 0.222   | 0.255     | 0.003            | COL21A1               | Hypermethylated in FP vs FN |
| cg09718037 | 0.679   | 0.385   | 0.294     | 0.003            | NA                    | Hypermethylated in FP vs FN |
| cg14183184 | 0.658   | 0.380   | 0.278     | 0.003            | NA                    | Hypermethylated in FP vs FN |
| cg04666975 | 0.629   | 0.363   | 0.266     | 0.003            | NA                    | Hypermethylated in FP vs FN |
| cg11983576 | 0.574   | 0.298   | 0.276     | 0.003            | NA                    | Hypermethylated in FP vs FN |
| cg07976390 | 0.451   | 0.191   | 0.260     | 0.003            | ADAR                  | Hypermethylated in FP vs FN |
| cg02023167 | 0.801   | 0.547   | 0.253     | 0.003            | NA                    | Hypermethylated in FP vs FN |
| cg26280713 | 0.784   | 0.508   | 0.276     | 0.003            | NA                    | Hypermethylated in FP vs FN |
| cg08297751 | 0.773   | 0.485   | 0.288     | 0.003            | NA                    | Hypermethylated in FP vs FN |
| cg02821871 | 0.772   | 0.513   | 0.260     | 0.003            | NA                    | Hypermethylated in FP vs FN |
| cg23714773 | 0.791   | 0.511   | 0.281     | 0.003            | NA                    | Hypermethylated in FP vs FN |

### Supplementary Table 7 (continued)

| Probe      | FP.mean | FN.mean | Mean.diff | Adjusted.P.value | Promoter.related.gene | Category                    |
|------------|---------|---------|-----------|------------------|-----------------------|-----------------------------|
| cg16835233 | 0.573   | 0.286   | 0.287     | 0.003            | NA                    | Hypermethylated in FP vs FN |
| cg17737681 | 0.575   | 0.319   | 0.256     | 0.003            | NA                    | Hypermethylated in FP vs FN |
| cg18108716 | 0.501   | 0.206   | 0.295     | 0.003            | NA                    | Hypermethylated in FP vs FN |
| cg05860723 | 0.661   | 0.391   | 0.269     | 0.003            | NA                    | Hypermethylated in FP vs FN |
| cg02346492 | 0.416   | 0.154   | 0.262     | 0.003            | NA                    | Hypermethylated in FP vs FN |
| cg02963119 | 0.690   | 0.430   | 0.261     | 0.003            | DEC2                  | Hypermethylated in FP vs FN |
| cg19388016 | 0.457   | 0.143   | 0.314     | 0.003            | NA                    | Hypermethylated in FP vs FN |
| cg15703636 | 0.487   | 0.219   | 0.268     | 0.003            | COL21A1               | Hypermethylated in FP vs FN |
| cg06528559 | 0.597   | 0.290   | 0.307     | 0.003            | LOC100132215          | Hypermethylated in FP vs FN |
| cg24759337 | 0.623   | 0.311   | 0.311     | 0.003            | NA                    | Hypermethylated in FP vs FN |
| cg02101773 | 0.814   | 0.521   | 0.293     | 0.003            | INSM1                 | Hypermethylated in FP vs FN |
| cg23030863 | 0.466   | 0.206   | 0.260     | 0.003            | NA                    | Hypermethylated in FP vs FN |
| cg03124636 | 0.596   | 0.321   | 0.276     | 0.003            | FLOT1                 | Hypermethylated in FP vs FN |
| cg08557649 | 0.523   | 0.255   | 0.268     | 0.003            | NA                    | Hypermethylated in FP vs FN |
| cg22943498 | 0.840   | 0.560   | 0.280     | 0.003            | NNAT                  | Hypermethylated in FP vs FN |
| cg25537434 | 0.709   | 0.452   | 0.256     | 0.003            | NA                    | Hypermethylated in FP vs FN |
| cg02442619 | 0.597   | 0.323   | 0.274     | 0.003            | DCN                   | Hypermethylated in FP vs FN |
| cg22719826 | 0.784   | 0.530   | 0.254     | 0.003            | NA                    | Hypermethylated in FP vs FN |
| cg23681339 | 0.528   | 0.276   | 0.251     | 0.003            | FBRSL1                | Hypermethylated in FP vs FN |
| cg06422883 | 0.604   | 0.348   | 0.256     | 0.003            | NA                    | Hypermethylated in FP vs FN |
| cg27218796 | 0.844   | 0.586   | 0.258     | 0.003            | NA                    | Hypermethylated in FP vs FN |
| cg23440822 | 0.505   | 0.224   | 0.281     | 0.003            | NA                    | Hypermethylated in FP vs FN |
| cg15556943 | 0.688   | 0.371   | 0.317     | 0.003            | NA                    | Hypermethylated in FP vs FN |
| cg22633840 | 0.759   | 0.504   | 0.255     | 0.003            | NA                    | Hypermethylated in FP vs FN |
| cg27635394 | 0.580   | 0.292   | 0.288     | 0.003            | HIST1H2BB             | Hypermethylated in FP vs FN |

### Supplementary Table 7 (continued)

| Probe      | FP.mean | FN.mean | Mean.diff | Adjusted.P.value | Promoter.related.gene | Category                    |
|------------|---------|---------|-----------|------------------|-----------------------|-----------------------------|
| cg05060949 | 0.451   | 0.183   | 0.268     | 0.003            | NA                    | Hypermethylated in FP vs FN |
| cg16737517 | 0.623   | 0.351   | 0.272     | 0.003            | NA                    | Hypermethylated in FP vs FN |
| cg17504394 | 0.588   | 0.331   | 0.256     | 0.003            | NA                    | Hypermethylated in FP vs FN |
| cg06693983 | 0.486   | 0.229   | 0.257     | 0.003            | NA                    | Hypermethylated in FP vs FN |
| cg05627733 | 0.636   | 0.377   | 0.259     | 0.003            | NA                    | Hypermethylated in FP vs FN |
| cg09346546 | 0.680   | 0.412   | 0.268     | 0.003            | NA                    | Hypermethylated in FP vs FN |
| cg05985589 | 0.569   | 0.303   | 0.266     | 0.003            | CYTL1                 | Hypermethylated in FP vs FN |
| cg21126707 | 0.724   | 0.450   | 0.274     | 0.003            | MYF5                  | Hypermethylated in FP vs FN |
| cg09486778 | 0.669   | 0.414   | 0.255     | 0.003            | NA                    | Hypermethylated in FP vs FN |
| cg18369516 | 0.645   | 0.335   | 0.310     | 0.003            | NA                    | Hypermethylated in FP vs FN |
| cg04555966 | 0.734   | 0.449   | 0.286     | 0.003            | NA                    | Hypermethylated in FP vs FN |
| cg05952572 | 0.601   | 0.321   | 0.279     | 0.003            | NA                    | Hypermethylated in FP vs FN |
| cg15938529 | 0.612   | 0.329   | 0.283     | 0.003            | NA                    | Hypermethylated in FP vs FN |
| cg23642200 | 0.499   | 0.215   | 0.285     | 0.003            | NA                    | Hypermethylated in FP vs FN |
| cg07571734 | 0.749   | 0.448   | 0.301     | 0.004            | NA                    | Hypermethylated in FP vs FN |
| cg14606586 | 0.395   | 0.137   | 0.258     | 0.004            | NA                    | Hypermethylated in FP vs FN |
| cg17723653 | 0.644   | 0.376   | 0.268     | 0.004            | NA                    | Hypermethylated in FP vs FN |
| cg07045891 | 0.610   | 0.340   | 0.269     | 0.004            | NA                    | Hypermethylated in FP vs FN |
| cg20401567 | 0.649   | 0.394   | 0.255     | 0.004            | NA                    | Hypermethylated in FP vs FN |
| cg05176991 | 0.588   | 0.305   | 0.283     | 0.004            | KCTD1                 | Hypermethylated in FP vs FN |
| cg04153822 | 0.581   | 0.320   | 0.261     | 0.004            | NA                    | Hypermethylated in FP vs FN |
| cg14317609 | 0.406   | 0.144   | 0.262     | 0.004            | NA                    | Hypermethylated in FP vs FN |
| cg09411730 | 0.484   | 0.223   | 0.260     | 0.004            | NA                    | Hypermethylated in FP vs FN |
| cg17614974 | 0.545   | 0.256   | 0.289     | 0.004            | NA                    | Hypermethylated in FP vs FN |
| cg01176433 | 0.757   | 0.482   | 0.275     | 0.004            | NA                    | Hypermethylated in FP vs FN |



### Supplementary Table 7 (continued)

| Probe      | FP.mean | FN.mean | Mean.diff | Adjusted.P.value | Promoter.related.gene | Category                    |
|------------|---------|---------|-----------|------------------|-----------------------|-----------------------------|
| cg13558754 | 0.587   | 0.335   | 0.252     | 0.004            | HSPB6_C19orf55        | Hypermethylated in FP vs FN |
| cg08718490 | 0.533   | 0.249   | 0.284     | 0.004            | NA                    | Hypermethylated in FP vs FN |
| cg26156687 | 0.687   | 0.412   | 0.275     | 0.004            | NA                    | Hypermethylated in FP vs FN |
| cg19497517 | 0.794   | 0.534   | 0.259     | 0.004            | PLEC1                 | Hypermethylated in FP vs FN |
| cg18586886 | 0.611   | 0.331   | 0.280     | 0.004            | KIAA1949              | Hypermethylated in FP vs FN |
| cg00586817 | 0.750   | 0.497   | 0.253     | 0.004            | NA                    | Hypermethylated in FP vs FN |
| cg06544882 | 0.800   | 0.546   | 0.255     | 0.004            | NA                    | Hypermethylated in FP vs FN |
| cg20403938 | 0.676   | 0.380   | 0.296     | 0.004            | HOXC10                | Hypermethylated in FP vs FN |
| cg07246273 | 0.575   | 0.299   | 0.276     | 0.004            | NA                    | Hypermethylated in FP vs FN |
| cg14262681 | 0.745   | 0.441   | 0.303     | 0.004            | NA                    | Hypermethylated in FP vs FN |
| cg19280586 | 0.525   | 0.249   | 0.277     | 0.004            | NA                    | Hypermethylated in FP vs FN |
| cg01665823 | 0.521   | 0.251   | 0.270     | 0.004            | HIST1H2BE             | Hypermethylated in FP vs FN |
| cg04933208 | 0.540   | 0.275   | 0.265     | 0.004            | NA                    | Hypermethylated in FP vs FN |
| cg15214183 | 0.777   | 0.482   | 0.295     | 0.004            | NA                    | Hypermethylated in FP vs FN |
| cg22452230 | 0.745   | 0.488   | 0.257     | 0.004            | NA                    | Hypermethylated in FP vs FN |
| cg16898124 | 0.631   | 0.316   | 0.315     | 0.004            | ZXDC                  | Hypermethylated in FP vs FN |
| cg05099145 | 0.732   | 0.458   | 0.274     | 0.004            | NA                    | Hypermethylated in FP vs FN |
| cg14189782 | 0.738   | 0.465   | 0.272     | 0.004            | EHBP1L1               | Hypermethylated in FP vs FN |
| cg23693289 | 0.662   | 0.364   | 0.298     | 0.004            | PTK2B                 | Hypermethylated in FP vs FN |
| cg06304401 | 0.477   | 0.204   | 0.272     | 0.004            | NA                    | Hypermethylated in FP vs FN |
| cg05157725 | 0.475   | 0.212   | 0.263     | 0.004            | COL21A1               | Hypermethylated in FP vs FN |
| cg02407342 | 0.770   | 0.514   | 0.256     | 0.004            | NA                    | Hypermethylated in FP vs FN |
| cg09968723 | 0.684   | 0.372   | 0.312     | 0.004            | BAI1                  | Hypermethylated in FP vs FN |
| cg11330740 | 0.634   | 0.369   | 0.265     | 0.004            | NA                    | Hypermethylated in FP vs FN |
| cg17508991 | 0.504   | 0.243   | 0.261     | 0.004            | HCK                   | Hypermethylated in FP vs FN |

### Supplementary Table 7 (continued)

| Probe      | FP.mean | FN.mean | Mean.diff | Adjusted.P.value | Promoter.related.gene | Category                    |
|------------|---------|---------|-----------|------------------|-----------------------|-----------------------------|
| cg21635854 | 0.375   | 0.118   | 0.257     | 0.004            | NA                    | Hypermethylated in FP vs FN |
| cg16041686 | 0.762   | 0.511   | 0.251     | 0.004            | NA                    | Hypermethylated in FP vs FN |
| cg10963518 | 0.536   | 0.275   | 0.262     | 0.005            | NA                    | Hypermethylated in FP vs FN |
| cg23975840 | 0.652   | 0.374   | 0.278     | 0.005            | NA                    | Hypermethylated in FP vs FN |
| cg17069396 | 0.496   | 0.223   | 0.273     | 0.005            | NA                    | Hypermethylated in FP vs FN |
| cg15297724 | 0.635   | 0.355   | 0.280     | 0.005            | NA                    | Hypermethylated in FP vs FN |
| cg00560542 | 0.618   | 0.342   | 0.276     | 0.005            | NA                    | Hypermethylated in FP vs FN |
| cg13804182 | 0.590   | 0.320   | 0.270     | 0.005            | FLOT1                 | Hypermethylated in FP vs FN |
| cg13337949 | 0.656   | 0.372   | 0.284     | 0.005            | FLOT1                 | Hypermethylated in FP vs FN |
| cg27545367 | 0.627   | 0.349   | 0.278     | 0.005            | FLOT1                 | Hypermethylated in FP vs FN |
| cg03596016 | 0.764   | 0.483   | 0.281     | 0.005            | LOC149134             | Hypermethylated in FP vs FN |
| cg16235582 | 0.676   | 0.402   | 0.274     | 0.005            | NA                    | Hypermethylated in FP vs FN |
| cg18979589 | 0.759   | 0.490   | 0.269     | 0.005            | NA                    | Hypermethylated in FP vs FN |
| cg03889542 | 0.605   | 0.306   | 0.299     | 0.005            | NA                    | Hypermethylated in FP vs FN |
| cg08079908 | 0.551   | 0.297   | 0.254     | 0.005            | NA                    | Hypermethylated in FP vs FN |
| cg11333189 | 0.729   | 0.477   | 0.253     | 0.005            | NA                    | Hypermethylated in FP vs FN |
| cg10791959 | 0.663   | 0.399   | 0.264     | 0.005            | NA                    | Hypermethylated in FP vs FN |
| cg10938374 | 0.399   | 0.148   | 0.251     | 0.005            | NA                    | Hypermethylated in FP vs FN |
| cg26884027 | 0.583   | 0.319   | 0.264     | 0.005            | NA                    | Hypermethylated in FP vs FN |
| cg05131488 | 0.659   | 0.409   | 0.250     | 0.005            | ETV1                  | Hypermethylated in FP vs FN |
| cg24675557 | 0.818   | 0.555   | 0.263     | 0.005            | NNAT                  | Hypermethylated in FP vs FN |
| cg06962177 | 0.796   | 0.494   | 0.302     | 0.005            | NA                    | Hypermethylated in FP vs FN |
| cg24208826 | 0.516   | 0.220   | 0.296     | 0.005            | NA                    | Hypermethylated in FP vs FN |
| cg13019491 | 0.707   | 0.433   | 0.274     | 0.005            | NA                    | Hypermethylated in FP vs FN |
| cg26191923 | 0.620   | 0.370   | 0.251     | 0.005            | HIST1H2BE             | Hypermethylated in FP vs FN |

### Supplementary Table 7 (continued)

| Probe      | FP.mean | FN.mean | Mean.diff | Adjusted.P.value | Promoter.related.gene | Category                    |
|------------|---------|---------|-----------|------------------|-----------------------|-----------------------------|
| cg04887807 | 0.555   | 0.252   | 0.303     | 0.005            | CYTL1                 | Hypermethylated in FP vs FN |
| cg15027300 | 0.634   | 0.374   | 0.261     | 0.005            | NA                    | Hypermethylated in FP vs FN |
| cg00756032 | 0.711   | 0.459   | 0.252     | 0.005            | NA                    | Hypermethylated in FP vs FN |
| cg16357224 | 0.702   | 0.444   | 0.257     | 0.005            | NA                    | Hypermethylated in FP vs FN |
| cg01114088 | 0.576   | 0.281   | 0.295     | 0.005            | CYTL1                 | Hypermethylated in FP vs FN |
| cg17029019 | 0.560   | 0.289   | 0.271     | 0.005            | HIC1                  | Hypermethylated in FP vs FN |
| cg19497031 | 0.438   | 0.169   | 0.269     | 0.005            | NA                    | Hypermethylated in FP vs FN |
| cg23227355 | 0.476   | 0.216   | 0.260     | 0.005            | NA                    | Hypermethylated in FP vs FN |
| cg19978550 | 0.642   | 0.373   | 0.269     | 0.005            | NA                    | Hypermethylated in FP vs FN |
| cg21004899 | 0.750   | 0.490   | 0.259     | 0.005            | CREB5                 | Hypermethylated in FP vs FN |
| cg03084949 | 0.811   | 0.556   | 0.255     | 0.006            | NA                    | Hypermethylated in FP vs FN |
| cg24977886 | 0.663   | 0.412   | 0.251     | 0.006            | FAM109B               | Hypermethylated in FP vs FN |
| cg25548594 | 0.671   | 0.418   | 0.254     | 0.006            | NA                    | Hypermethylated in FP vs FN |
| cg23440004 | 0.597   | 0.344   | 0.253     | 0.006            | NA                    | Hypermethylated in FP vs FN |
| cg18579564 | 0.510   | 0.256   | 0.255     | 0.006            | NA                    | Hypermethylated in FP vs FN |
| cg17389738 | 0.607   | 0.343   | 0.264     | 0.006            | FLOT1                 | Hypermethylated in FP vs FN |
| cg07997936 | 0.624   | 0.352   | 0.273     | 0.006            | HIST1H2BE             | Hypermethylated in FP vs FN |
| cg05186320 | 0.619   | 0.363   | 0.256     | 0.006            | NA                    | Hypermethylated in FP vs FN |
| cg12392684 | 0.579   | 0.312   | 0.267     | 0.006            | HIST1H2BE             | Hypermethylated in FP vs FN |
| cg17526887 | 0.660   | 0.391   | 0.269     | 0.006            | NA                    | Hypermethylated in FP vs FN |
| cg23605670 | 0.820   | 0.565   | 0.255     | 0.006            | NNAT                  | Hypermethylated in FP vs FN |
| cg19340420 | 0.582   | 0.314   | 0.269     | 0.006            | NA                    | Hypermethylated in FP vs FN |
| cg10981598 | 0.805   | 0.545   | 0.260     | 0.006            | NNAT                  | Hypermethylated in FP vs FN |
| cg10665891 | 0.562   | 0.298   | 0.263     | 0.006            | NA                    | Hypermethylated in FP vs FN |
| cg26516362 | 0.568   | 0.273   | 0.295     | 0.006            | RUFY1                 | Hypermethylated in FP vs FN |

### Supplementary Table 7 (continued)

| Probe      | FP.mean | FN.mean | Mean.diff | Adjusted.P.value | Promoter.related.gene | Category                    |
|------------|---------|---------|-----------|------------------|-----------------------|-----------------------------|
| cg20042639 | 0.547   | 0.297   | 0.250     | 0.006            | NA                    | Hypermethylated in FP vs FN |
| cg00420348 | 0.523   | 0.269   | 0.254     | 0.006            | NA                    | Hypermethylated in FP vs FN |
| cg00028678 | 0.625   | 0.366   | 0.259     | 0.006            | ARHGEF4               | Hypermethylated in FP vs FN |
| cg26581714 | 0.574   | 0.317   | 0.257     | 0.006            | NA                    | Hypermethylated in FP vs FN |
| cg06482019 | 0.513   | 0.230   | 0.282     | 0.006            | NA                    | Hypermethylated in FP vs FN |
| cg16748008 | 0.731   | 0.476   | 0.255     | 0.007            | HOXA3                 | Hypermethylated in FP vs FN |
| cg14149680 | 0.647   | 0.344   | 0.302     | 0.007            | NA                    | Hypermethylated in FP vs FN |
| cg09060608 | 0.572   | 0.298   | 0.274     | 0.007            | RUFY1                 | Hypermethylated in FP vs FN |
| cg09341793 | 0.870   | 0.591   | 0.279     | 0.007            | NA                    | Hypermethylated in FP vs FN |
| cg22942804 | 0.568   | 0.314   | 0.254     | 0.007            | HIST1H2BE             | Hypermethylated in FP vs FN |
| cg07858113 | 0.648   | 0.347   | 0.301     | 0.007            | FLOT1                 | Hypermethylated in FP vs FN |
| cg20707230 | 0.762   | 0.469   | 0.293     | 0.007            | NA                    | Hypermethylated in FP vs FN |
| cg14084907 | 0.567   | 0.281   | 0.286     | 0.007            | NA                    | Hypermethylated in FP vs FN |
| cg18381051 | 0.773   | 0.523   | 0.251     | 0.007            | NA                    | Hypermethylated in FP vs FN |
| cg26032198 | 0.646   | 0.385   | 0.261     | 0.007            | NA                    | Hypermethylated in FP vs FN |
| cg11171221 | 0.679   | 0.390   | 0.289     | 0.007            | NA                    | Hypermethylated in FP vs FN |
| cg19814981 | 0.719   | 0.459   | 0.260     | 0.007            | NA                    | Hypermethylated in FP vs FN |
| cg21226059 | 0.573   | 0.278   | 0.295     | 0.008            | RUFY1                 | Hypermethylated in FP vs FN |
| cg10703826 | 0.726   | 0.467   | 0.259     | 0.008            | TBX15                 | Hypermethylated in FP vs FN |
| cg03199564 | 0.561   | 0.256   | 0.305     | 0.008            | CYTL1                 | Hypermethylated in FP vs FN |
| cg00080972 | 0.601   | 0.330   | 0.270     | 0.009            | RUFY1                 | Hypermethylated in FP vs FN |
| cg16670554 | 0.740   | 0.490   | 0.250     | 0.009            | NA                    | Hypermethylated in FP vs FN |
| cg13647892 | 0.687   | 0.436   | 0.251     | 0.009            | NA                    | Hypermethylated in FP vs FN |
| cg16535144 | 0.655   | 0.367   | 0.288     | 0.009            | NA                    | Hypermethylated in FP vs FN |
| cg04987499 | 0.507   | 0.253   | 0.254     | 0.009            | CYB561                | Hypermethylated in FP vs FN |

### Supplementary Table 7 (continued)

| Probe      | FP.mean | FN.mean | Mean.diff | Adjusted.P.value | Promoter.related.gene | Category                    |
|------------|---------|---------|-----------|------------------|-----------------------|-----------------------------|
| cg07289306 | 0.613   | 0.339   | 0.274     | 0.009            | NA                    | Hypermethylated in FP vs FN |
| cg09614300 | 0.633   | 0.379   | 0.254     | 0.009            | HMX3                  | Hypermethylated in FP vs FN |
| cg00327669 | 0.811   | 0.546   | 0.265     | 0.009            | NA                    | Hypermethylated in FP vs FN |
| cg14507337 | 0.774   | 0.506   | 0.268     | 0.009            | NA                    | Hypermethylated in FP vs FN |
| cg01821429 | 0.616   | 0.360   | 0.256     | 0.010            | NA                    | Hypermethylated in FP vs FN |
| cg05457628 | 0.541   | 0.263   | 0.278     | 0.010            | RUFY1                 | Hypermethylated in FP vs FN |
| cg26426142 | 0.523   | 0.267   | 0.256     | 0.010            | HIST1H2BB_HIST1H3C    | Hypermethylated in FP vs FN |
| cg07835424 | 0.742   | 0.463   | 0.279     | 0.010            | NA                    | Hypermethylated in FP vs FN |
| cg01558212 | 0.733   | 0.472   | 0.261     | 0.010            | NA                    | Hypermethylated in FP vs FN |
| cg07701237 | 0.547   | 0.272   | 0.275     | 0.010            | HIST1H2BB_HIST1H3C    | Hypermethylated in FP vs FN |
| cg24873562 | 0.599   | 0.311   | 0.287     | 0.010            | NA                    | Hypermethylated in FP vs FN |
| cg22840219 | 0.554   | 0.301   | 0.253     | 0.010            | NA                    | Hypermethylated in FP vs FN |
| cg27005749 | 0.659   | 0.406   | 0.253     | 0.010            | NA                    | Hypermethylated in FP vs FN |
| cg19264651 | 0.650   | 0.367   | 0.282     | 0.010            | NA                    | Hypermethylated in FP vs FN |
| cg08457178 | 0.618   | 0.346   | 0.272     | 0.010            | FLOT1                 | Hypermethylated in FP vs FN |
| cg01323777 | 0.658   | 0.386   | 0.272     | 0.010            | KCNAB3                | Hypermethylated in FP vs FN |
| cg23663774 | 0.641   | 0.370   | 0.271     | 0.010            | NA                    | Hypermethylated in FP vs FN |
| cg16513459 | 0.615   | 0.354   | 0.260     | 0.010            | KCNAB3                | Hypermethylated in FP vs FN |
| cg23401796 | 0.589   | 0.335   | 0.253     | 0.010            | NA                    | Hypermethylated in FP vs FN |
| cg13407335 | 0.640   | 0.364   | 0.276     | 0.010            | KCNAB3                | Hypermethylated in FP vs FN |
| cg14820908 | 0.580   | 0.299   | 0.281     | 0.010            | RUFY1                 | Hypermethylated in FP vs FN |
| cg14918082 | 0.593   | 0.332   | 0.261     | 0.010            | KCNAB3                | Hypermethylated in FP vs FN |
| cg02221866 | 0.551   | 0.297   | 0.254     | 0.010            | HIST1H2BB_HIST1H3C    | Hypermethylated in FP vs FN |
| cg08384314 | 0.560   | 0.292   | 0.268     | 0.010            | FLOT1                 | Hypermethylated in FP vs FN |
| cg06497668 | 0.545   | 0.273   | 0.272     | 0.010            | NA                    | Hypermethylated in FP vs FN |

### Supplementary Table 7 (continued)

| Probe      | FP.mean | FN.mean | Mean.diff | Adjusted.P.value | Promoter.related.gene | Category                    |
|------------|---------|---------|-----------|------------------|-----------------------|-----------------------------|
| cg00442112 | 0.509   | 0.253   | 0.257     | 1e-02            | CYTL1                 | Hypermethylated in FP vs FN |
| cg00612515 | 0.731   | 0.476   | 0.255     | 1e-02            | NA                    | Hypermethylated in FP vs FN |
| cg03740978 | 0.719   | 0.459   | 0.260     | 2e-02            | KCTD1                 | Hypermethylated in FP vs FN |
| cg07933078 | 0.728   | 0.475   | 0.254     | 2e-02            | NA                    | Hypermethylated in FP vs FN |
| cg25272065 | 0.633   | 0.372   | 0.261     | 2e-02            | NA                    | Hypermethylated in FP vs FN |
| cg25438963 | 0.522   | 0.263   | 0.259     | 2e-02            | HIST1H3C              | Hypermethylated in FP vs FN |
| cg04374711 | 0.607   | 0.346   | 0.261     | 2e-02            | NA                    | Hypermethylated in FP vs FN |
| cg05646373 | 0.497   | 0.241   | 0.256     | 2e-02            | HIST1H2BB_HIST1H3C    | Hypermethylated in FP vs FN |
| cg10082647 | 0.573   | 0.309   | 0.264     | 2e-02            | C12orf23              | Hypermethylated in FP vs FN |
| cg23365801 | 0.570   | 0.316   | 0.255     | 2e-02            | KCNAB3                | Hypermethylated in FP vs FN |
| cg13377102 | 0.636   | 0.373   | 0.263     | 2e-02            | KCNAB3                | Hypermethylated in FP vs FN |
| cg05825244 | 0.737   | 0.456   | 0.281     | 2e-02            | NA                    | Hypermethylated in FP vs FN |
| cg21042456 | 0.715   | 0.446   | 0.268     | 2e-02            | NA                    | Hypermethylated in FP vs FN |
| cg04586407 | 0.629   | 0.376   | 0.253     | 2e-02            | NA                    | Hypermethylated in FP vs FN |
| cg16306898 | 0.553   | 0.302   | 0.251     | 2e-02            | C1orf70               | Hypermethylated in FP vs FN |
| cg09991306 | 0.687   | 0.433   | 0.254     | 3e-02            | NA                    | Hypermethylated in FP vs FN |
| cg15487867 | 0.603   | 0.333   | 0.270     | 3e-02            | C1orf70               | Hypermethylated in FP vs FN |
| cg21017569 | 0.674   | 0.421   | 0.253     | 3e-02            | KCNAB3                | Hypermethylated in FP vs FN |
| cg16601494 | 0.677   | 0.411   | 0.266     | 3e-02            | C1orf70               | Hypermethylated in FP vs FN |
| cg13118906 | 0.546   | 0.296   | 0.250     | 3e-02            | CYB561                | Hypermethylated in FP vs FN |
| cg23475625 | 0.661   | 0.407   | 0.254     | 3e-02            | NA                    | Hypermethylated in FP vs FN |
| cg04828133 | 0.653   | 0.375   | 0.278     | 4e-02            | NA                    | Hypermethylated in FP vs FN |
| cg27201457 | 0.541   | 0.948   | -0.406    | 2e-17            | NA                    | Hypomethylated in FP vs FN  |
| cg23244464 | 0.302   | 0.876   | -0.573    | 5e-17            | NA                    | Hypomethylated in FP vs FN  |
| cg00731944 | 0.417   | 0.887   | -0.470    | 4e-15            | NA                    | Hypomethylated in FP vs FN  |

### Supplementary Table 7 (continued)

| Probe      | FP.mean | FN.mean | Mean.diff | Adjusted.P.value | Promoter.related.gene | Category                   |
|------------|---------|---------|-----------|------------------|-----------------------|----------------------------|
| cg14978242 | 0.284   | 0.835   | -0.551    | 2e-14            | NA                    | Hypomethylated in FP vs FN |
| cg19646759 | 0.392   | 0.871   | -0.478    | 2e-14            | NA                    | Hypomethylated in FP vs FN |
| cg03717755 | 0.417   | 0.805   | -0.388    | 2e-14            | NA                    | Hypomethylated in FP vs FN |
| cg24075760 | 0.271   | 0.710   | -0.439    | 4e-14            | NA                    | Hypomethylated in FP vs FN |
| cg00704869 | 0.416   | 0.803   | -0.387    | 5e-14            | NA                    | Hypomethylated in FP vs FN |
| cg22648929 | 0.507   | 0.916   | -0.409    | 5e-14            | NA                    | Hypomethylated in FP vs FN |
| cg09389557 | 0.397   | 0.861   | -0.464    | 5e-14            | NA                    | Hypomethylated in FP vs FN |
| cg13637654 | 0.146   | 0.682   | -0.536    | 8e-14            | NA                    | Hypomethylated in FP vs FN |
| cg00785831 | 0.391   | 0.872   | -0.481    | 2e-13            | NA                    | Hypomethylated in FP vs FN |
| cg02102889 | 0.445   | 0.796   | -0.351    | 2e-13            | SLC7A11               | Hypomethylated in FP vs FN |
| cg17971251 | 0.394   | 0.850   | -0.456    | 3e-13            | NA                    | Hypomethylated in FP vs FN |
| cg13676538 | 0.586   | 0.911   | -0.325    | 3e-13            | NA                    | Hypomethylated in FP vs FN |
| cg10774480 | 0.504   | 0.898   | -0.394    | 3e-13            | NA                    | Hypomethylated in FP vs FN |
| cg04516757 | 0.259   | 0.724   | -0.465    | 3e-13            | NA                    | Hypomethylated in FP vs FN |
| cg02255721 | 0.534   | 0.847   | -0.313    | 4e-13            | NA                    | Hypomethylated in FP vs FN |
| cg25115276 | 0.464   | 0.873   | -0.410    | 5e-13            | NA                    | Hypomethylated in FP vs FN |
| cg23332610 | 0.514   | 0.845   | -0.331    | 5e-13            | NA                    | Hypomethylated in FP vs FN |
| cg14814167 | 0.284   | 0.781   | -0.497    | 5e-13            | NA                    | Hypomethylated in FP vs FN |
| cg15335728 | 0.475   | 0.886   | -0.410    | 5e-13            | NA                    | Hypomethylated in FP vs FN |
| cg00670539 | 0.438   | 0.907   | -0.469    | 6e-13            | CETN1                 | Hypomethylated in FP vs FN |
| cg04767697 | 0.429   | 0.796   | -0.367    | 7e-13            | NA                    | Hypomethylated in FP vs FN |
| cg19784880 | 0.234   | 0.743   | -0.509    | 7e-13            | NA                    | Hypomethylated in FP vs FN |
| cg03082830 | 0.454   | 0.867   | -0.413    | 7e-13            | NA                    | Hypomethylated in FP vs FN |
| cg11959316 | 0.348   | 0.833   | -0.485    | 8e-13            | NA                    | Hypomethylated in FP vs FN |
| cg12936779 | 0.607   | 0.882   | -0.276    | 9e-13            | NA                    | Hypomethylated in FP vs FN |

### Supplementary Table 7 (continued)

| Probe      | FP.mean | FN.mean | Mean.diff | Adjusted.P.value | Promoter.related.gene | Category                   |
|------------|---------|---------|-----------|------------------|-----------------------|----------------------------|
| cg11033588 | 0.438   | 0.815   | -0.377    | 1e-12            | NA                    | Hypomethylated in FP vs FN |
| cg14053575 | 0.499   | 0.815   | -0.316    | 1e-12            | NA                    | Hypomethylated in FP vs FN |
| cg10308611 | 0.641   | 0.937   | -0.296    | 1e-12            | NA                    | Hypomethylated in FP vs FN |
| cg22690339 | 0.329   | 0.743   | -0.413    | 1e-12            | NA                    | Hypomethylated in FP vs FN |
| cg14723032 | 0.422   | 0.814   | -0.391    | 1e-12            | PITPNM3               | Hypomethylated in FP vs FN |
| cg26986447 | 0.473   | 0.843   | -0.370    | 2e-12            | NA                    | Hypomethylated in FP vs FN |
| cg11995490 | 0.304   | 0.657   | -0.353    | 2e-12            | NA                    | Hypomethylated in FP vs FN |
| cg09162993 | 0.373   | 0.755   | -0.382    | 2e-12            | NA                    | Hypomethylated in FP vs FN |
| cg15082028 | 0.105   | 0.566   | -0.461    | 2e-12            | NA                    | Hypomethylated in FP vs FN |
| cg00637695 | 0.332   | 0.758   | -0.426    | 2e-12            | NA                    | Hypomethylated in FP vs FN |
| cg08605773 | 0.481   | 0.800   | -0.319    | 3e-12            | NA                    | Hypomethylated in FP vs FN |
| cg10513161 | 0.390   | 0.756   | -0.367    | 3e-12            | NA                    | Hypomethylated in FP vs FN |
| cg20916646 | 0.425   | 0.841   | -0.416    | 3e-12            | NA                    | Hypomethylated in FP vs FN |
| cg07661965 | 0.342   | 0.799   | -0.457    | 3e-12            | NA                    | Hypomethylated in FP vs FN |
| cg21840948 | 0.354   | 0.806   | -0.453    | 3e-12            | NA                    | Hypomethylated in FP vs FN |
| cg20731110 | 0.419   | 0.918   | -0.499    | 4e-12            | CETN1                 | Hypomethylated in FP vs FN |
| cg19142054 | 0.507   | 0.895   | -0.387    | 4e-12            | CETN1                 | Hypomethylated in FP vs FN |
| cg02132604 | 0.435   | 0.822   | -0.387    | 4e-12            | NA                    | Hypomethylated in FP vs FN |
| cg07206676 | 0.334   | 0.741   | -0.407    | 5e-12            | NA                    | Hypomethylated in FP vs FN |
| cg08350288 | 0.166   | 0.782   | -0.616    | 5e-12            | NA                    | Hypomethylated in FP vs FN |
| cg03502791 | 0.241   | 0.746   | -0.505    | 5e-12            | NA                    | Hypomethylated in FP vs FN |
| cg25112643 | 0.351   | 0.741   | -0.389    | 5e-12            | NA                    | Hypomethylated in FP vs FN |
| cg00737571 | 0.315   | 0.762   | -0.447    | 5e-12            | NA                    | Hypomethylated in FP vs FN |
| cg18323018 | 0.563   | 0.860   | -0.298    | 7e-12            | NA                    | Hypomethylated in FP vs FN |
| cg01564640 | 0.371   | 0.896   | -0.525    | 8e-12            | NA                    | Hypomethylated in FP vs FN |



### Supplementary Table 7 (continued)

| Probe      | FP.mean | FN.mean | Mean.diff | Adjusted.P.value | Promoter.related.gene | Category                   |
|------------|---------|---------|-----------|------------------|-----------------------|----------------------------|
| cg04349839 | 0.408   | 0.865   | -0.457    | 9e-12            | NA                    | Hypomethylated in FP vs FN |
| cg13845049 | 0.401   | 0.835   | -0.434    | 1e-11            | NA                    | Hypomethylated in FP vs FN |
| cg10884539 | 0.317   | 0.704   | -0.387    | 1e-11            | MYLK4                 | Hypomethylated in FP vs FN |
| cg25316172 | 0.405   | 0.828   | -0.424    | 1e-11            | CYFIP2                | Hypomethylated in FP vs FN |
| cg22906113 | 0.538   | 0.888   | -0.350    | 1e-11            | NA                    | Hypomethylated in FP vs FN |
| cg13890451 | 0.218   | 0.707   | -0.489    | 1e-11            | NA                    | Hypomethylated in FP vs FN |
| cg08571020 | 0.401   | 0.781   | -0.380    | 1e-11            | C10orf62              | Hypomethylated in FP vs FN |
| cg07289841 | 0.463   | 0.826   | -0.362    | 1e-11            | NA                    | Hypomethylated in FP vs FN |
| cg03388445 | 0.498   | 0.851   | -0.353    | 1e-11            | NA                    | Hypomethylated in FP vs FN |
| cg14126884 | 0.332   | 0.769   | -0.437    | 1e-11            | NA                    | Hypomethylated in FP vs FN |
| cg24070990 | 0.270   | 0.611   | -0.342    | 1e-11            | NA                    | Hypomethylated in FP vs FN |
| cg19098465 | 0.451   | 0.869   | -0.418    | 1e-11            | NA                    | Hypomethylated in FP vs FN |
| cg10711528 | 0.460   | 0.802   | -0.342    | 2e-11            | NA                    | Hypomethylated in FP vs FN |
| cg14692453 | 0.463   | 0.829   | -0.366    | 2e-11            | NA                    | Hypomethylated in FP vs FN |
| cg01398428 | 0.463   | 0.848   | -0.385    | 2e-11            | NA                    | Hypomethylated in FP vs FN |
| cg01780685 | 0.551   | 0.870   | -0.319    | 2e-11            | NA                    | Hypomethylated in FP vs FN |
| cg07500957 | 0.420   | 0.836   | -0.416    | 2e-11            | NA                    | Hypomethylated in FP vs FN |
| cg11366683 | 0.349   | 0.790   | -0.441    | 2e-11            | NA                    | Hypomethylated in FP vs FN |
| cg15685223 | 0.317   | 0.753   | -0.436    | 2e-11            | NA                    | Hypomethylated in FP vs FN |
| cg17337091 | 0.508   | 0.795   | -0.287    | 2e-11            | NA                    | Hypomethylated in FP vs FN |
| cg17389077 | 0.319   | 0.737   | -0.418    | 2e-11            | NA                    | Hypomethylated in FP vs FN |
| cg03060986 | 0.470   | 0.798   | -0.327    | 2e-11            | NA                    | Hypomethylated in FP vs FN |
| cg16412000 | 0.489   | 0.852   | -0.363    | 2e-11            | NA                    | Hypomethylated in FP vs FN |
| cg00355286 | 0.317   | 0.758   | -0.441    | 2e-11            | NA                    | Hypomethylated in FP vs FN |
| cg04914198 | 0.384   | 0.790   | -0.405    | 2e-11            | PPFIA4                | Hypomethylated in FP vs FN |

**Supplementary Table 7 (continued)**

| Probe      | FP.mean | FN.mean | Mean.diff | Adjusted.P.value | Promoter.related.gene | Category                   |
|------------|---------|---------|-----------|------------------|-----------------------|----------------------------|
| cg08976646 | 0.397   | 0.856   | -0.459    | 2e-11            | NA                    | Hypomethylated in FP vs FN |
| cg23100428 | 0.309   | 0.742   | -0.433    | 3e-11            | NA                    | Hypomethylated in FP vs FN |
| cg02320980 | 0.166   | 0.691   | -0.525    | 3e-11            | NA                    | Hypomethylated in FP vs FN |
| cg00794881 | 0.144   | 0.713   | -0.569    | 3e-11            | NA                    | Hypomethylated in FP vs FN |
| cg21579294 | 0.404   | 0.755   | -0.351    | 3e-11            | NA                    | Hypomethylated in FP vs FN |
| cg25281849 | 0.414   | 0.781   | -0.367    | 3e-11            | NA                    | Hypomethylated in FP vs FN |
| cg16483326 | 0.414   | 0.813   | -0.399    | 3e-11            | NA                    | Hypomethylated in FP vs FN |
| cg01475008 | 0.582   | 0.864   | -0.281    | 3e-11            | NA                    | Hypomethylated in FP vs FN |
| cg01352551 | 0.561   | 0.844   | -0.283    | 3e-11            | SLC24A3               | Hypomethylated in FP vs FN |
| cg07894586 | 0.463   | 0.821   | -0.358    | 3e-11            | NA                    | Hypomethylated in FP vs FN |
| cg18931850 | 0.467   | 0.783   | -0.316    | 3e-11            | NA                    | Hypomethylated in FP vs FN |
| cg18098187 | 0.352   | 0.766   | -0.414    | 3e-11            | NA                    | Hypomethylated in FP vs FN |
| cg00399027 | 0.398   | 0.829   | -0.431    | 3e-11            | NA                    | Hypomethylated in FP vs FN |
| cg24598973 | 0.359   | 0.757   | -0.398    | 4e-11            | NA                    | Hypomethylated in FP vs FN |
| cg24092282 | 0.369   | 0.772   | -0.404    | 4e-11            | NA                    | Hypomethylated in FP vs FN |
| cg01514831 | 0.379   | 0.845   | -0.467    | 4e-11            | NA                    | Hypomethylated in FP vs FN |
| cg19672751 | 0.449   | 0.838   | -0.388    | 4e-11            | NA                    | Hypomethylated in FP vs FN |
| cg16061656 | 0.607   | 0.874   | -0.267    | 4e-11            | NA                    | Hypomethylated in FP vs FN |
| cg13984005 | 0.485   | 0.802   | -0.317    | 4e-11            | NA                    | Hypomethylated in FP vs FN |
| cg26147935 | 0.508   | 0.848   | -0.340    | 5e-11            | NA                    | Hypomethylated in FP vs FN |
| cg23300509 | 0.530   | 0.871   | -0.341    | 5e-11            | NA                    | Hypomethylated in FP vs FN |
| cg18804920 | 0.319   | 0.719   | -0.400    | 5e-11            | NA                    | Hypomethylated in FP vs FN |
| cg03553758 | 0.422   | 0.816   | -0.394    | 5e-11            | NA                    | Hypomethylated in FP vs FN |
| cg05303999 | 0.414   | 0.834   | -0.421    | 5e-11            | NA                    | Hypomethylated in FP vs FN |
| cg01904151 | 0.545   | 0.855   | -0.310    | 5e-11            | NA                    | Hypomethylated in FP vs FN |

### Supplementary Table 7 (continued)

| Probe      | FP.mean | FN.mean | Mean.diff | Adjusted.P.value | Promoter.related.gene | Category                   |
|------------|---------|---------|-----------|------------------|-----------------------|----------------------------|
| cg05775517 | 0.453   | 0.811   | -0.358    | 5e-11            | NA                    | Hypomethylated in FP vs FN |
| cg09688726 | 0.417   | 0.738   | -0.322    | 5e-11            | NA                    | Hypomethylated in FP vs FN |
| cg01794853 | 0.386   | 0.716   | -0.330    | 5e-11            | HSPG2                 | Hypomethylated in FP vs FN |
| cg07009284 | 0.354   | 0.791   | -0.436    | 5e-11            | NA                    | Hypomethylated in FP vs FN |
| cg05327931 | 0.518   | 0.845   | -0.326    | 6e-11            | NA                    | Hypomethylated in FP vs FN |
| cg17526145 | 0.507   | 0.839   | -0.331    | 7e-11            | NA                    | Hypomethylated in FP vs FN |
| cg06754496 | 0.435   | 0.801   | -0.366    | 7e-11            | NA                    | Hypomethylated in FP vs FN |
| cg23951305 | 0.482   | 0.900   | -0.418    | 7e-11            | NA                    | Hypomethylated in FP vs FN |
| cg13319468 | 0.394   | 0.794   | -0.400    | 8e-11            | NA                    | Hypomethylated in FP vs FN |
| cg15773539 | 0.276   | 0.627   | -0.350    | 8e-11            | NA                    | Hypomethylated in FP vs FN |
| cg06347896 | 0.393   | 0.827   | -0.434    | 8e-11            | NA                    | Hypomethylated in FP vs FN |
| cg21597487 | 0.490   | 0.845   | -0.356    | 8e-11            | NA                    | Hypomethylated in FP vs FN |
| cg06200092 | 0.224   | 0.756   | -0.533    | 8e-11            | NA                    | Hypomethylated in FP vs FN |
| cg24150325 | 0.424   | 0.814   | -0.390    | 1e-10            | NA                    | Hypomethylated in FP vs FN |
| cg26450275 | 0.420   | 0.822   | -0.401    | 1e-10            | NA                    | Hypomethylated in FP vs FN |
| cg19879906 | 0.356   | 0.754   | -0.398    | 1e-10            | NA                    | Hypomethylated in FP vs FN |
| cg25145680 | 0.387   | 0.877   | -0.490    | 1e-10            | NA                    | Hypomethylated in FP vs FN |
| cg14539422 | 0.255   | 0.634   | -0.378    | 1e-10            | RGS3                  | Hypomethylated in FP vs FN |
| cg06295784 | 0.403   | 0.753   | -0.350    | 1e-10            | NA                    | Hypomethylated in FP vs FN |
| cg21902772 | 0.420   | 0.754   | -0.334    | 1e-10            | RARB                  | Hypomethylated in FP vs FN |
| cg16852704 | 0.166   | 0.665   | -0.499    | 1e-10            | NA                    | Hypomethylated in FP vs FN |
| cg14953730 | 0.414   | 0.788   | -0.374    | 1e-10            | NA                    | Hypomethylated in FP vs FN |
| cg02522760 | 0.375   | 0.864   | -0.489    | 1e-10            | NA                    | Hypomethylated in FP vs FN |
| cg10335736 | 0.349   | 0.809   | -0.461    | 1e-10            | NA                    | Hypomethylated in FP vs FN |
| cg21570843 | 0.382   | 0.822   | -0.439    | 1e-10            | NA                    | Hypomethylated in FP vs FN |

**Supplementary Table 7 (continued)**

| Probe      | FP.mean | FN.mean | Mean.diff | Adjusted.P.value | Promoter.related.gene | Category                   |
|------------|---------|---------|-----------|------------------|-----------------------|----------------------------|
| cg26787863 | 0.388   | 0.780   | -0.392    | 1e-10            | NA                    | Hypomethylated in FP vs FN |
| cg08796342 | 0.353   | 0.795   | -0.442    | 1e-10            | TC2N                  | Hypomethylated in FP vs FN |
| cg08946995 | 0.398   | 0.818   | -0.420    | 1e-10            | NA                    | Hypomethylated in FP vs FN |
| cg24872571 | 0.474   | 0.855   | -0.381    | 1e-10            | NA                    | Hypomethylated in FP vs FN |
| cg22765117 | 0.395   | 0.763   | -0.368    | 1e-10            | NA                    | Hypomethylated in FP vs FN |
| cg22973319 | 0.114   | 0.625   | -0.511    | 1e-10            | NA                    | Hypomethylated in FP vs FN |
| cg21244322 | 0.190   | 0.682   | -0.492    | 1e-10            | NA                    | Hypomethylated in FP vs FN |
| cg06338958 | 0.394   | 0.804   | -0.410    | 2e-10            | NA                    | Hypomethylated in FP vs FN |
| cg27154660 | 0.342   | 0.696   | -0.354    | 2e-10            | NA                    | Hypomethylated in FP vs FN |
| cg18387985 | 0.530   | 0.865   | -0.336    | 2e-10            | NA                    | Hypomethylated in FP vs FN |
| cg06846458 | 0.398   | 0.807   | -0.409    | 2e-10            | SLC25A29              | Hypomethylated in FP vs FN |
| cg06765552 | 0.107   | 0.667   | -0.560    | 2e-10            | NA                    | Hypomethylated in FP vs FN |
| cg04462567 | 0.484   | 0.851   | -0.366    | 2e-10            | NA                    | Hypomethylated in FP vs FN |
| cg25692002 | 0.445   | 0.861   | -0.417    | 2e-10            | NA                    | Hypomethylated in FP vs FN |
| cg04545872 | 0.401   | 0.848   | -0.446    | 2e-10            | NA                    | Hypomethylated in FP vs FN |
| cg20682573 | 0.532   | 0.834   | -0.301    | 2e-10            | NA                    | Hypomethylated in FP vs FN |
| cg01872216 | 0.130   | 0.706   | -0.576    | 2e-10            | NA                    | Hypomethylated in FP vs FN |
| cg01871526 | 0.490   | 0.824   | -0.334    | 2e-10            | NA                    | Hypomethylated in FP vs FN |
| cg16092370 | 0.474   | 0.847   | -0.373    | 2e-10            | NA                    | Hypomethylated in FP vs FN |
| cg04967009 | 0.522   | 0.879   | -0.357    | 2e-10            | NA                    | Hypomethylated in FP vs FN |
| cg26516446 | 0.532   | 0.881   | -0.348    | 2e-10            | NA                    | Hypomethylated in FP vs FN |
| cg17576603 | 0.460   | 0.861   | -0.400    | 2e-10            | NA                    | Hypomethylated in FP vs FN |
| cg07711036 | 0.556   | 0.864   | -0.308    | 2e-10            | MIR218-1              | Hypomethylated in FP vs FN |
| cg16341266 | 0.404   | 0.814   | -0.410    | 2e-10            | MIR548I4              | Hypomethylated in FP vs FN |
| cg16822407 | 0.307   | 0.646   | -0.339    | 2e-10            | NA                    | Hypomethylated in FP vs FN |

### Supplementary Table 7 (continued)

| Probe      | FP.mean | FN.mean | Mean.diff | Adjusted.P.value | Promoter.related.gene | Category                   |
|------------|---------|---------|-----------|------------------|-----------------------|----------------------------|
| cg05750926 | 0.269   | 0.736   | -0.467    | 2e-10            | NA                    | Hypomethylated in FP vs FN |
| cg07325692 | 0.338   | 0.820   | -0.482    | 2e-10            | NA                    | Hypomethylated in FP vs FN |
| cg06464468 | 0.540   | 0.839   | -0.300    | 2e-10            | NA                    | Hypomethylated in FP vs FN |
| cg26978064 | 0.239   | 0.690   | -0.451    | 2e-10            | NA                    | Hypomethylated in FP vs FN |
| cg09127472 | 0.353   | 0.759   | -0.407    | 2e-10            | NA                    | Hypomethylated in FP vs FN |
| cg14291693 | 0.433   | 0.778   | -0.345    | 2e-10            | NA                    | Hypomethylated in FP vs FN |
| cg19132360 | 0.384   | 0.761   | -0.377    | 2e-10            | OTOR                  | Hypomethylated in FP vs FN |
| cg13204673 | 0.455   | 0.795   | -0.340    | 2e-10            | NA                    | Hypomethylated in FP vs FN |
| cg20655099 | 0.419   | 0.759   | -0.340    | 2e-10            | NA                    | Hypomethylated in FP vs FN |
| cg13805001 | 0.324   | 0.640   | -0.316    | 2e-10            | NA                    | Hypomethylated in FP vs FN |
| cg22842189 | 0.369   | 0.791   | -0.422    | 3e-10            | NA                    | Hypomethylated in FP vs FN |
| cg25734842 | 0.157   | 0.621   | -0.463    | 3e-10            | NA                    | Hypomethylated in FP vs FN |
| cg12806728 | 0.379   | 0.774   | -0.395    | 3e-10            | NA                    | Hypomethylated in FP vs FN |
| cg20412217 | 0.396   | 0.804   | -0.408    | 3e-10            | NA                    | Hypomethylated in FP vs FN |
| cg05982301 | 0.296   | 0.688   | -0.391    | 3e-10            | NA                    | Hypomethylated in FP vs FN |
| cg18835865 | 0.485   | 0.813   | -0.329    | 3e-10            | NA                    | Hypomethylated in FP vs FN |
| cg20373635 | 0.231   | 0.684   | -0.452    | 3e-10            | NA                    | Hypomethylated in FP vs FN |
| cg12720921 | 0.320   | 0.679   | -0.359    | 3e-10            | NA                    | Hypomethylated in FP vs FN |
| cg12808194 | 0.413   | 0.802   | -0.389    | 3e-10            | NA                    | Hypomethylated in FP vs FN |
| cg02575712 | 0.147   | 0.648   | -0.502    | 3e-10            | NA                    | Hypomethylated in FP vs FN |
| cg04751839 | 0.366   | 0.751   | -0.385    | 3e-10            | NA                    | Hypomethylated in FP vs FN |
| cg06586578 | 0.388   | 0.821   | -0.433    | 3e-10            | NA                    | Hypomethylated in FP vs FN |
| cg25856632 | 0.348   | 0.791   | -0.443    | 3e-10            | NA                    | Hypomethylated in FP vs FN |
| cg04030444 | 0.517   | 0.885   | -0.367    | 3e-10            | NA                    | Hypomethylated in FP vs FN |
| cg13699414 | 0.140   | 0.678   | -0.538    | 3e-10            | NA                    | Hypomethylated in FP vs FN |

### Supplementary Table 7 (continued)

| Probe      | FP.mean | FN.mean | Mean.diff | Adjusted.P.value | Promoter.related.gene | Category                   |
|------------|---------|---------|-----------|------------------|-----------------------|----------------------------|
| cg26281310 | 0.584   | 0.865   | -0.281    | 3e-10            | NA                    | Hypomethylated in FP vs FN |
| cg00869582 | 0.545   | 0.854   | -0.309    | 3e-10            | NA                    | Hypomethylated in FP vs FN |
| cg05612654 | 0.451   | 0.841   | -0.390    | 3e-10            | NA                    | Hypomethylated in FP vs FN |
| cg20696698 | 0.442   | 0.799   | -0.357    | 3e-10            | NA                    | Hypomethylated in FP vs FN |
| cg17202331 | 0.477   | 0.867   | -0.389    | 3e-10            | BTBD3                 | Hypomethylated in FP vs FN |
| cg14780990 | 0.338   | 0.735   | -0.397    | 4e-10            | NA                    | Hypomethylated in FP vs FN |
| cg02418175 | 0.334   | 0.760   | -0.426    | 4e-10            | NA                    | Hypomethylated in FP vs FN |
| cg26446832 | 0.386   | 0.768   | -0.382    | 4e-10            | NA                    | Hypomethylated in FP vs FN |
| cg13034825 | 0.525   | 0.886   | -0.361    | 4e-10            | NA                    | Hypomethylated in FP vs FN |
| cg25921543 | 0.288   | 0.727   | -0.438    | 4e-10            | NA                    | Hypomethylated in FP vs FN |
| cg15638338 | 0.514   | 0.836   | -0.322    | 4e-10            | NA                    | Hypomethylated in FP vs FN |
| cg25739142 | 0.421   | 0.788   | -0.367    | 4e-10            | NA                    | Hypomethylated in FP vs FN |
| cg25449821 | 0.415   | 0.748   | -0.333    | 4e-10            | NA                    | Hypomethylated in FP vs FN |
| cg27538859 | 0.405   | 0.784   | -0.379    | 4e-10            | NA                    | Hypomethylated in FP vs FN |
| cg22807241 | 0.488   | 0.793   | -0.305    | 4e-10            | NA                    | Hypomethylated in FP vs FN |
| cg12565679 | 0.444   | 0.839   | -0.394    | 4e-10            | NA                    | Hypomethylated in FP vs FN |
| cg20122645 | 0.499   | 0.857   | -0.359    | 4e-10            | NA                    | Hypomethylated in FP vs FN |
| cg02370877 | 0.285   | 0.715   | -0.429    | 4e-10            | NA                    | Hypomethylated in FP vs FN |
| cg00330492 | 0.113   | 0.602   | -0.489    | 4e-10            | NA                    | Hypomethylated in FP vs FN |
| cg26315862 | 0.104   | 0.677   | -0.573    | 4e-10            | NA                    | Hypomethylated in FP vs FN |
| cg11108115 | 0.374   | 0.818   | -0.444    | 4e-10            | NA                    | Hypomethylated in FP vs FN |
| cg09512004 | 0.436   | 0.814   | -0.378    | 4e-10            | NA                    | Hypomethylated in FP vs FN |
| cg04864600 | 0.524   | 0.897   | -0.373    | 4e-10            | NA                    | Hypomethylated in FP vs FN |
| cg08105005 | 0.471   | 0.843   | -0.372    | 5e-10            | NA                    | Hypomethylated in FP vs FN |
| cg13397568 | 0.305   | 0.723   | -0.418    | 5e-10            | NA                    | Hypomethylated in FP vs FN |

### Supplementary Table 7 (continued)

| Probe      | FP.mean | FN.mean | Mean.diff | Adjusted.P.value | Promoter.related.gene | Category                   |
|------------|---------|---------|-----------|------------------|-----------------------|----------------------------|
| cg03264693 | 0.399   | 0.781   | -0.383    | 5e-10            | NA                    | Hypomethylated in FP vs FN |
| cg02077256 | 0.369   | 0.729   | -0.361    | 5e-10            | NA                    | Hypomethylated in FP vs FN |
| cg13466253 | 0.566   | 0.852   | -0.285    | 5e-10            | NA                    | Hypomethylated in FP vs FN |
| cg24322623 | 0.108   | 0.479   | -0.371    | 5e-10            | MYOD1                 | Hypomethylated in FP vs FN |
| cg10893667 | 0.400   | 0.803   | -0.402    | 5e-10            | C5orf13               | Hypomethylated in FP vs FN |
| cg08836353 | 0.367   | 0.750   | -0.384    | 5e-10            | SLC7A9                | Hypomethylated in FP vs FN |
| cg14970991 | 0.297   | 0.742   | -0.446    | 5e-10            | NA                    | Hypomethylated in FP vs FN |
| cg18461635 | 0.508   | 0.848   | -0.339    | 5e-10            | NA                    | Hypomethylated in FP vs FN |
| cg15205636 | 0.076   | 0.593   | -0.517    | 5e-10            | NA                    | Hypomethylated in FP vs FN |
| cg00513981 | 0.423   | 0.761   | -0.338    | 5e-10            | NA                    | Hypomethylated in FP vs FN |
| cg03639429 | 0.433   | 0.783   | -0.350    | 5e-10            | NA                    | Hypomethylated in FP vs FN |
| cg21196708 | 0.505   | 0.839   | -0.334    | 5e-10            | NA                    | Hypomethylated in FP vs FN |
| cg23072051 | 0.394   | 0.786   | -0.392    | 5e-10            | NA                    | Hypomethylated in FP vs FN |
| cg22265273 | 0.433   | 0.875   | -0.443    | 5e-10            | CETN1                 | Hypomethylated in FP vs FN |
| cg00569056 | 0.496   | 0.849   | -0.354    | 5e-10            | NA                    | Hypomethylated in FP vs FN |
| cg26635576 | 0.478   | 0.864   | -0.386    | 5e-10            | NA                    | Hypomethylated in FP vs FN |
| cg04928293 | 0.592   | 0.851   | -0.259    | 5e-10            | NA                    | Hypomethylated in FP vs FN |
| cg01710084 | 0.386   | 0.800   | -0.414    | 5e-10            | NA                    | Hypomethylated in FP vs FN |
| cg20165037 | 0.316   | 0.772   | -0.456    | 5e-10            | NA                    | Hypomethylated in FP vs FN |
| cg22510376 | 0.162   | 0.707   | -0.545    | 5e-10            | NA                    | Hypomethylated in FP vs FN |
| cg13153808 | 0.475   | 0.824   | -0.349    | 5e-10            | NA                    | Hypomethylated in FP vs FN |
| cg14497697 | 0.344   | 0.766   | -0.423    | 6e-10            | NA                    | Hypomethylated in FP vs FN |
| cg10163299 | 0.382   | 0.766   | -0.384    | 6e-10            | OTOR                  | Hypomethylated in FP vs FN |
| cg03294458 | 0.126   | 0.564   | -0.438    | 6e-10            | NA                    | Hypomethylated in FP vs FN |
| cg09975093 | 0.572   | 0.884   | -0.312    | 6e-10            | NA                    | Hypomethylated in FP vs FN |

### Supplementary Table 7 (continued)

| Probe      | FP.mean | FN.mean | Mean.diff | Adjusted.P.value | Promoter.related.gene | Category                   |
|------------|---------|---------|-----------|------------------|-----------------------|----------------------------|
| cg15184781 | 0.417   | 0.784   | -0.367    | 6e-10            | NA                    | Hypomethylated in FP vs FN |
| cg00797152 | 0.435   | 0.745   | -0.310    | 6e-10            | CALML5                | Hypomethylated in FP vs FN |
| cg14124132 | 0.611   | 0.888   | -0.277    | 6e-10            | C12orf70              | Hypomethylated in FP vs FN |
| cg10230257 | 0.549   | 0.849   | -0.300    | 6e-10            | NA                    | Hypomethylated in FP vs FN |
| cg08651538 | 0.359   | 0.766   | -0.407    | 6e-10            | NA                    | Hypomethylated in FP vs FN |
| cg16699540 | 0.428   | 0.761   | -0.332    | 6e-10            | NA                    | Hypomethylated in FP vs FN |
| cg05205299 | 0.441   | 0.801   | -0.359    | 6e-10            | NA                    | Hypomethylated in FP vs FN |
| cg09423651 | 0.566   | 0.866   | -0.300    | 6e-10            | NA                    | Hypomethylated in FP vs FN |
| cg21228259 | 0.365   | 0.859   | -0.494    | 6e-10            | NA                    | Hypomethylated in FP vs FN |
| cg15637234 | 0.568   | 0.874   | -0.306    | 7e-10            | NA                    | Hypomethylated in FP vs FN |
| cg24600706 | 0.240   | 0.700   | -0.460    | 7e-10            | NA                    | Hypomethylated in FP vs FN |
| cg18485872 | 0.521   | 0.819   | -0.297    | 7e-10            | NEU4                  | Hypomethylated in FP vs FN |
| cg20951825 | 0.416   | 0.773   | -0.357    | 7e-10            | NA                    | Hypomethylated in FP vs FN |
| cg14372792 | 0.335   | 0.706   | -0.372    | 7e-10            | NA                    | Hypomethylated in FP vs FN |
| cg05289897 | 0.412   | 0.868   | -0.456    | 7e-10            | NA                    | Hypomethylated in FP vs FN |
| cg11054936 | 0.255   | 0.697   | -0.442    | 7e-10            | NA                    | Hypomethylated in FP vs FN |
| cg09358961 | 0.517   | 0.898   | -0.381    | 7e-10            | NA                    | Hypomethylated in FP vs FN |
| cg21545013 | 0.489   | 0.784   | -0.295    | 7e-10            | NA                    | Hypomethylated in FP vs FN |
| cg21185289 | 0.050   | 0.656   | -0.606    | 8e-10            | NA                    | Hypomethylated in FP vs FN |
| cg06810231 | 0.449   | 0.774   | -0.325    | 8e-10            | NA                    | Hypomethylated in FP vs FN |
| cg27302539 | 0.178   | 0.674   | -0.496    | 8e-10            | NA                    | Hypomethylated in FP vs FN |
| cg11435651 | 0.451   | 0.840   | -0.389    | 8e-10            | NA                    | Hypomethylated in FP vs FN |
| cg22803642 | 0.336   | 0.679   | -0.343    | 8e-10            | NA                    | Hypomethylated in FP vs FN |
| cg14087401 | 0.473   | 0.758   | -0.284    | 9e-10            | NA                    | Hypomethylated in FP vs FN |
| cg13829804 | 0.559   | 0.861   | -0.302    | 9e-10            | NA                    | Hypomethylated in FP vs FN |



### Supplementary Table 7 (continued)

| Probe      | FP.mean | FN.mean | Mean.diff | Adjusted.P.value | Promoter.related.gene | Category                   |
|------------|---------|---------|-----------|------------------|-----------------------|----------------------------|
| cg04156643 | 0.486   | 0.810   | -0.324    | 9e-10            | NA                    | Hypomethylated in FP vs FN |
| cg11936311 | 0.256   | 0.752   | -0.496    | 9e-10            | NA                    | Hypomethylated in FP vs FN |
| cg05043557 | 0.154   | 0.541   | -0.386    | 9e-10            | PITPNM3               | Hypomethylated in FP vs FN |
| cg00126173 | 0.503   | 0.789   | -0.287    | 9e-10            | NA                    | Hypomethylated in FP vs FN |
| cg21489565 | 0.293   | 0.736   | -0.442    | 9e-10            | NA                    | Hypomethylated in FP vs FN |
| cg02186748 | 0.306   | 0.746   | -0.440    | 9e-10            | COL1A1                | Hypomethylated in FP vs FN |
| cg18919209 | 0.409   | 0.823   | -0.414    | 9e-10            | NA                    | Hypomethylated in FP vs FN |
| cg22427313 | 0.431   | 0.822   | -0.391    | 9e-10            | NA                    | Hypomethylated in FP vs FN |
| cg23206822 | 0.407   | 0.758   | -0.351    | 9e-10            | NA                    | Hypomethylated in FP vs FN |
| cg26869506 | 0.297   | 0.851   | -0.554    | 1e-09            | NA                    | Hypomethylated in FP vs FN |
| cg25013838 | 0.513   | 0.836   | -0.323    | 1e-09            | MYO18B                | Hypomethylated in FP vs FN |
| cg16530165 | 0.346   | 0.757   | -0.411    | 1e-09            | NPPC                  | Hypomethylated in FP vs FN |
| cg19399514 | 0.292   | 0.678   | -0.385    | 1e-09            | NA                    | Hypomethylated in FP vs FN |
| cg17978037 | 0.626   | 0.888   | -0.262    | 1e-09            | NA                    | Hypomethylated in FP vs FN |
| cg03899510 | 0.363   | 0.755   | -0.392    | 1e-09            | NA                    | Hypomethylated in FP vs FN |
| cg19107055 | 0.492   | 0.856   | -0.364    | 1e-09            | NA                    | Hypomethylated in FP vs FN |
| cg04487600 | 0.582   | 0.870   | -0.288    | 1e-09            | NA                    | Hypomethylated in FP vs FN |
| cg21582785 | 0.372   | 0.770   | -0.399    | 1e-09            | NA                    | Hypomethylated in FP vs FN |
| cg07092145 | 0.468   | 0.810   | -0.342    | 1e-09            | NA                    | Hypomethylated in FP vs FN |
| cg20915632 | 0.132   | 0.583   | -0.451    | 1e-09            | NA                    | Hypomethylated in FP vs FN |
| cg02028758 | 0.507   | 0.847   | -0.340    | 1e-09            | NA                    | Hypomethylated in FP vs FN |
| cg17112695 | 0.390   | 0.756   | -0.366    | 1e-09            | NA                    | Hypomethylated in FP vs FN |
| cg08023416 | 0.283   | 0.732   | -0.449    | 1e-09            | NA                    | Hypomethylated in FP vs FN |
| cg25383593 | 0.189   | 0.518   | -0.329    | 1e-09            | NA                    | Hypomethylated in FP vs FN |
| cg00356645 | 0.521   | 0.868   | -0.347    | 1e-09            | NA                    | Hypomethylated in FP vs FN |

### Supplementary Table 7 (continued)

| Probe      | FP.mean | FN.mean | Mean.diff | Adjusted.P.value | Promoter.related.gene | Category                   |
|------------|---------|---------|-----------|------------------|-----------------------|----------------------------|
| cg03768338 | 0.437   | 0.802   | -0.364    | 1e-09            | NA                    | Hypomethylated in FP vs FN |
| cg24290546 | 0.438   | 0.787   | -0.349    | 1e-09            | NA                    | Hypomethylated in FP vs FN |
| cg19621008 | 0.479   | 0.887   | -0.408    | 1e-09            | NA                    | Hypomethylated in FP vs FN |
| cg01987333 | 0.368   | 0.757   | -0.390    | 1e-09            | NEU4                  | Hypomethylated in FP vs FN |
| cg03674552 | 0.603   | 0.862   | -0.260    | 1e-09            | NA                    | Hypomethylated in FP vs FN |
| cg17201542 | 0.488   | 0.822   | -0.334    | 1e-09            | NA                    | Hypomethylated in FP vs FN |
| cg13540952 | 0.493   | 0.796   | -0.304    | 1e-09            | NA                    | Hypomethylated in FP vs FN |
| cg24232092 | 0.565   | 0.855   | -0.291    | 1e-09            | NA                    | Hypomethylated in FP vs FN |
| cg02252421 | 0.245   | 0.631   | -0.386    | 1e-09            | NA                    | Hypomethylated in FP vs FN |
| cg15315385 | 0.277   | 0.712   | -0.435    | 1e-09            | NA                    | Hypomethylated in FP vs FN |
| cg11459133 | 0.506   | 0.850   | -0.344    | 1e-09            | NA                    | Hypomethylated in FP vs FN |
| cg14005246 | 0.210   | 0.762   | -0.552    | 1e-09            | NA                    | Hypomethylated in FP vs FN |
| cg26716902 | 0.152   | 0.658   | -0.506    | 1e-09            | NA                    | Hypomethylated in FP vs FN |
| cg07037112 | 0.177   | 0.620   | -0.443    | 1e-09            | NA                    | Hypomethylated in FP vs FN |
| cg15261730 | 0.369   | 0.719   | -0.349    | 1e-09            | NA                    | Hypomethylated in FP vs FN |
| cg00832581 | 0.381   | 0.778   | -0.396    | 1e-09            | NA                    | Hypomethylated in FP vs FN |
| cg04642300 | 0.273   | 0.661   | -0.388    | 1e-09            | NA                    | Hypomethylated in FP vs FN |
| cg21473407 | 0.412   | 0.763   | -0.351    | 1e-09            | NA                    | Hypomethylated in FP vs FN |
| cg00407866 | 0.369   | 0.791   | -0.422    | 1e-09            | NA                    | Hypomethylated in FP vs FN |
| cg12467960 | 0.516   | 0.864   | -0.349    | 2e-09            | NA                    | Hypomethylated in FP vs FN |
| cg19998012 | 0.501   | 0.811   | -0.310    | 2e-09            | NA                    | Hypomethylated in FP vs FN |
| cg05556038 | 0.510   | 0.830   | -0.319    | 2e-09            | NA                    | Hypomethylated in FP vs FN |
| cg10909790 | 0.490   | 0.766   | -0.276    | 2e-09            | NA                    | Hypomethylated in FP vs FN |
| cg04722955 | 0.552   | 0.880   | -0.329    | 2e-09            | NA                    | Hypomethylated in FP vs FN |
| cg10555744 | 0.326   | 0.684   | -0.359    | 2e-09            | NA                    | Hypomethylated in FP vs FN |

**Supplementary Table 7 (continued)**

| Probe      | FP.mean | FN.mean | Mean.diff | Adjusted.P.value | Promoter.related.gene | Category                   |
|------------|---------|---------|-----------|------------------|-----------------------|----------------------------|
| cg21080473 | 0.444   | 0.853   | -0.409    | 2e-09            | NA                    | Hypomethylated in FP vs FN |
| cg11207081 | 0.521   | 0.873   | -0.352    | 2e-09            | NA                    | Hypomethylated in FP vs FN |
| cg18963509 | 0.282   | 0.728   | -0.446    | 2e-09            | NA                    | Hypomethylated in FP vs FN |
| cg06246000 | 0.449   | 0.842   | -0.392    | 2e-09            | NA                    | Hypomethylated in FP vs FN |
| cg02113604 | 0.498   | 0.845   | -0.347    | 2e-09            | NA                    | Hypomethylated in FP vs FN |
| cg08175352 | 0.401   | 0.806   | -0.405    | 2e-09            | NA                    | Hypomethylated in FP vs FN |
| cg01403058 | 0.346   | 0.733   | -0.387    | 2e-09            | NA                    | Hypomethylated in FP vs FN |
| cg19453686 | 0.451   | 0.833   | -0.383    | 2e-09            | TC2N                  | Hypomethylated in FP vs FN |
| cg05750618 | 0.500   | 0.849   | -0.349    | 2e-09            | NA                    | Hypomethylated in FP vs FN |
| cg22504523 | 0.421   | 0.755   | -0.334    | 2e-09            | NA                    | Hypomethylated in FP vs FN |
| cg02692177 | 0.311   | 0.680   | -0.369    | 2e-09            | NA                    | Hypomethylated in FP vs FN |
| cg06989443 | 0.324   | 0.731   | -0.407    | 2e-09            | NA                    | Hypomethylated in FP vs FN |
| cg01806859 | 0.516   | 0.833   | -0.317    | 2e-09            | NA                    | Hypomethylated in FP vs FN |
| cg17472800 | 0.331   | 0.816   | -0.485    | 2e-09            | NA                    | Hypomethylated in FP vs FN |
| cg20594316 | 0.360   | 0.784   | -0.424    | 2e-09            | NA                    | Hypomethylated in FP vs FN |
| cg12992268 | 0.306   | 0.804   | -0.498    | 2e-09            | NA                    | Hypomethylated in FP vs FN |
| cg00817464 | 0.434   | 0.841   | -0.407    | 2e-09            | NA                    | Hypomethylated in FP vs FN |
| cg02165692 | 0.387   | 0.838   | -0.451    | 2e-09            | NA                    | Hypomethylated in FP vs FN |
| cg19824396 | 0.197   | 0.564   | -0.367    | 2e-09            | PPFIA4                | Hypomethylated in FP vs FN |
| cg23625341 | 0.473   | 0.867   | -0.394    | 2e-09            | NA                    | Hypomethylated in FP vs FN |
| cg06186245 | 0.300   | 0.725   | -0.425    | 2e-09            | NA                    | Hypomethylated in FP vs FN |
| cg22797169 | 0.385   | 0.779   | -0.394    | 2e-09            | IL1RL2                | Hypomethylated in FP vs FN |
| cg08181402 | 0.351   | 0.680   | -0.329    | 2e-09            | C16orf91              | Hypomethylated in FP vs FN |
| cg00936348 | 0.386   | 0.701   | -0.315    | 2e-09            | NA                    | Hypomethylated in FP vs FN |
| cg02995013 | 0.419   | 0.742   | -0.322    | 2e-09            | NA                    | Hypomethylated in FP vs FN |

### Supplementary Table 7 (continued)

| Probe      | FP.mean | FN.mean | Mean.diff | Adjusted.P.value | Promoter.related.gene | Category                   |
|------------|---------|---------|-----------|------------------|-----------------------|----------------------------|
| cg12842552 | 0.356   | 0.786   | -0.430    | 2e-09            | IGSF10                | Hypomethylated in FP vs FN |
| cg17678224 | 0.444   | 0.815   | -0.371    | 2e-09            | NA                    | Hypomethylated in FP vs FN |
| cg20343048 | 0.245   | 0.680   | -0.435    | 2e-09            | CLIC6                 | Hypomethylated in FP vs FN |
| cg09387528 | 0.474   | 0.813   | -0.338    | 2e-09            | NA                    | Hypomethylated in FP vs FN |
| cg13747137 | 0.606   | 0.885   | -0.279    | 2e-09            | NA                    | Hypomethylated in FP vs FN |
| cg02545885 | 0.559   | 0.846   | -0.287    | 2e-09            | NA                    | Hypomethylated in FP vs FN |
| cg18011760 | 0.441   | 0.812   | -0.370    | 2e-09            | NA                    | Hypomethylated in FP vs FN |
| cg07055769 | 0.416   | 0.811   | -0.395    | 2e-09            | NA                    | Hypomethylated in FP vs FN |
| cg20218614 | 0.294   | 0.698   | -0.403    | 3e-09            | FAM83A                | Hypomethylated in FP vs FN |
| cg16693201 | 0.341   | 0.676   | -0.335    | 3e-09            | NA                    | Hypomethylated in FP vs FN |
| cg01812499 | 0.511   | 0.865   | -0.354    | 3e-09            | NA                    | Hypomethylated in FP vs FN |
| cg19316647 | 0.567   | 0.863   | -0.296    | 3e-09            | NA                    | Hypomethylated in FP vs FN |
| cg02246725 | 0.353   | 0.637   | -0.284    | 3e-09            | NA                    | Hypomethylated in FP vs FN |
| cg24131452 | 0.334   | 0.799   | -0.465    | 3e-09            | NA                    | Hypomethylated in FP vs FN |
| cg05631625 | 0.440   | 0.858   | -0.418    | 3e-09            | NA                    | Hypomethylated in FP vs FN |
| cg27158519 | 0.408   | 0.771   | -0.363    | 3e-09            | NA                    | Hypomethylated in FP vs FN |
| cg05835241 | 0.385   | 0.699   | -0.314    | 3e-09            | NA                    | Hypomethylated in FP vs FN |
| cg16288579 | 0.371   | 0.804   | -0.433    | 3e-09            | NA                    | Hypomethylated in FP vs FN |
| cg15934607 | 0.335   | 0.755   | -0.420    | 3e-09            | NA                    | Hypomethylated in FP vs FN |
| cg17974054 | 0.516   | 0.806   | -0.290    | 3e-09            | NA                    | Hypomethylated in FP vs FN |
| cg06410158 | 0.369   | 0.725   | -0.357    | 3e-09            | NA                    | Hypomethylated in FP vs FN |
| cg19360930 | 0.544   | 0.849   | -0.305    | 3e-09            | NA                    | Hypomethylated in FP vs FN |
| cg24997330 | 0.504   | 0.836   | -0.331    | 3e-09            | NA                    | Hypomethylated in FP vs FN |
| cg12224508 | 0.156   | 0.481   | -0.326    | 3e-09            | NA                    | Hypomethylated in FP vs FN |
| cg20962215 | 0.311   | 0.618   | -0.307    | 3e-09            | NA                    | Hypomethylated in FP vs FN |

### Supplementary Table 7 (continued)

| Probe      | FP.mean | FN.mean | Mean.diff | Adjusted.P.value | Promoter.related.gene | Category                   |
|------------|---------|---------|-----------|------------------|-----------------------|----------------------------|
| cg20559634 | 0.205   | 0.476   | -0.271    | 3e-09            | NA                    | Hypomethylated in FP vs FN |
| cg21692620 | 0.164   | 0.610   | -0.446    | 3e-09            | NA                    | Hypomethylated in FP vs FN |
| cg01511828 | 0.315   | 0.780   | -0.465    | 3e-09            | CCBE1                 | Hypomethylated in FP vs FN |
| cg01454947 | 0.485   | 0.823   | -0.338    | 3e-09            | NA                    | Hypomethylated in FP vs FN |
| cg17545346 | 0.233   | 0.695   | -0.462    | 3e-09            | NA                    | Hypomethylated in FP vs FN |
| cg11177552 | 0.433   | 0.801   | -0.368    | 3e-09            | NA                    | Hypomethylated in FP vs FN |
| cg23470262 | 0.501   | 0.809   | -0.308    | 3e-09            | NA                    | Hypomethylated in FP vs FN |
| cg03723247 | 0.335   | 0.717   | -0.382    | 3e-09            | NA                    | Hypomethylated in FP vs FN |
| cg26786382 | 0.362   | 0.744   | -0.382    | 3e-09            | LRRC10B               | Hypomethylated in FP vs FN |
| cg14601621 | 0.420   | 0.849   | -0.430    | 3e-09            | NA                    | Hypomethylated in FP vs FN |
| cg17857870 | 0.274   | 0.712   | -0.438    | 3e-09            | NA                    | Hypomethylated in FP vs FN |
| cg22987457 | 0.574   | 0.872   | -0.298    | 3e-09            | NA                    | Hypomethylated in FP vs FN |
| cg26673396 | 0.364   | 0.625   | -0.261    | 3e-09            | C15orf37              | Hypomethylated in FP vs FN |
| cg00106093 | 0.571   | 0.884   | -0.313    | 3e-09            | NA                    | Hypomethylated in FP vs FN |
| cg17547864 | 0.316   | 0.747   | -0.431    | 3e-09            | NA                    | Hypomethylated in FP vs FN |
| cg20299399 | 0.403   | 0.715   | -0.312    | 3e-09            | NA                    | Hypomethylated in FP vs FN |
| cg11185904 | 0.442   | 0.735   | -0.293    | 3e-09            | NA                    | Hypomethylated in FP vs FN |
| cg25561762 | 0.309   | 0.738   | -0.429    | 3e-09            | NA                    | Hypomethylated in FP vs FN |
| cg02086690 | 0.432   | 0.809   | -0.377    | 3e-09            | NA                    | Hypomethylated in FP vs FN |
| cg14831539 | 0.239   | 0.559   | -0.319    | 3e-09            | NA                    | Hypomethylated in FP vs FN |
| cg06250886 | 0.508   | 0.839   | -0.331    | 3e-09            | NA                    | Hypomethylated in FP vs FN |
| cg16789849 | 0.361   | 0.689   | -0.328    | 3e-09            | NA                    | Hypomethylated in FP vs FN |
| cg02921904 | 0.558   | 0.861   | -0.303    | 3e-09            | NA                    | Hypomethylated in FP vs FN |
| cg25691026 | 0.588   | 0.872   | -0.284    | 3e-09            | NA                    | Hypomethylated in FP vs FN |
| cg11474864 | 0.226   | 0.709   | -0.484    | 3e-09            | NA                    | Hypomethylated in FP vs FN |

### Supplementary Table 7 (continued)

| Probe      | FP.mean | FN.mean | Mean.diff | Adjusted.P.value | Promoter.related.gene | Category                   |
|------------|---------|---------|-----------|------------------|-----------------------|----------------------------|
| cg04348023 | 0.336   | 0.704   | -0.368    | 4e-09            | PIN1L                 | Hypomethylated in FP vs FN |
| cg24748448 | 0.494   | 0.874   | -0.381    | 4e-09            | NA                    | Hypomethylated in FP vs FN |
| cg00869989 | 0.291   | 0.797   | -0.506    | 4e-09            | NA                    | Hypomethylated in FP vs FN |
| cg02148034 | 0.103   | 0.480   | -0.376    | 4e-09            | NA                    | Hypomethylated in FP vs FN |
| cg00803827 | 0.259   | 0.697   | -0.438    | 4e-09            | NA                    | Hypomethylated in FP vs FN |
| cg05201300 | 0.314   | 0.713   | -0.399    | 4e-09            | NA                    | Hypomethylated in FP vs FN |
| cg25513740 | 0.503   | 0.862   | -0.360    | 4e-09            | NA                    | Hypomethylated in FP vs FN |
| cg01602621 | 0.288   | 0.750   | -0.462    | 4e-09            | ACP5                  | Hypomethylated in FP vs FN |
| cg00352031 | 0.335   | 0.679   | -0.344    | 4e-09            | CREB3L1               | Hypomethylated in FP vs FN |
| cg18709737 | 0.425   | 0.828   | -0.403    | 4e-09            | NA                    | Hypomethylated in FP vs FN |
| cg04942107 | 0.457   | 0.827   | -0.370    | 4e-09            | NA                    | Hypomethylated in FP vs FN |
| cg15288350 | 0.574   | 0.830   | -0.256    | 4e-09            | NA                    | Hypomethylated in FP vs FN |
| cg13692655 | 0.450   | 0.736   | -0.286    | 4e-09            | FAM102A               | Hypomethylated in FP vs FN |
| cg08180831 | 0.440   | 0.794   | -0.354    | 4e-09            | NA                    | Hypomethylated in FP vs FN |
| cg02102771 | 0.245   | 0.556   | -0.311    | 4e-09            | NA                    | Hypomethylated in FP vs FN |
| cg24831140 | 0.380   | 0.755   | -0.374    | 4e-09            | NA                    | Hypomethylated in FP vs FN |
| cg08986840 | 0.359   | 0.631   | -0.272    | 4e-09            | NA                    | Hypomethylated in FP vs FN |
| cg22592142 | 0.193   | 0.680   | -0.487    | 4e-09            | NA                    | Hypomethylated in FP vs FN |
| cg12945054 | 0.457   | 0.778   | -0.322    | 4e-09            | NA                    | Hypomethylated in FP vs FN |
| cg06617528 | 0.391   | 0.808   | -0.416    | 4e-09            | NA                    | Hypomethylated in FP vs FN |
| cg11933693 | 0.227   | 0.608   | -0.381    | 4e-09            | NA                    | Hypomethylated in FP vs FN |
| cg21832906 | 0.238   | 0.504   | -0.266    | 4e-09            | NA                    | Hypomethylated in FP vs FN |
| cg05883269 | 0.564   | 0.862   | -0.298    | 4e-09            | NA                    | Hypomethylated in FP vs FN |
| cg00747342 | 0.511   | 0.858   | -0.347    | 5e-09            | NA                    | Hypomethylated in FP vs FN |
| cg11181726 | 0.378   | 0.740   | -0.362    | 5e-09            | NA                    | Hypomethylated in FP vs FN |

### Supplementary Table 7 (continued)

| Probe      | FP.mean | FN.mean | Mean.diff | Adjusted.P.value | Promoter.related.gene | Category                   |
|------------|---------|---------|-----------|------------------|-----------------------|----------------------------|
| cg15576082 | 0.485   | 0.824   | -0.339    | 5e-09            | NA                    | Hypomethylated in FP vs FN |
| cg17953646 | 0.407   | 0.786   | -0.379    | 5e-09            | NA                    | Hypomethylated in FP vs FN |
| cg05845879 | 0.405   | 0.843   | -0.438    | 5e-09            | NA                    | Hypomethylated in FP vs FN |
| cg02910494 | 0.515   | 0.846   | -0.331    | 5e-09            | NA                    | Hypomethylated in FP vs FN |
| cg20507742 | 0.458   | 0.844   | -0.387    | 5e-09            | NA                    | Hypomethylated in FP vs FN |
| cg15245520 | 0.605   | 0.913   | -0.308    | 5e-09            | NA                    | Hypomethylated in FP vs FN |
| cg14080888 | 0.358   | 0.672   | -0.314    | 5e-09            | FAM102A               | Hypomethylated in FP vs FN |
| cg20814179 | 0.331   | 0.707   | -0.376    | 5e-09            | NA                    | Hypomethylated in FP vs FN |
| cg25500616 | 0.507   | 0.819   | -0.312    | 5e-09            | NA                    | Hypomethylated in FP vs FN |
| cg20137237 | 0.122   | 0.629   | -0.507    | 5e-09            | NA                    | Hypomethylated in FP vs FN |
| cg21029167 | 0.539   | 0.879   | -0.340    | 5e-09            | NA                    | Hypomethylated in FP vs FN |
| cg08652487 | 0.112   | 0.537   | -0.425    | 5e-09            | ACTA1                 | Hypomethylated in FP vs FN |
| cg05769086 | 0.405   | 0.764   | -0.360    | 5e-09            | NA                    | Hypomethylated in FP vs FN |
| cg17407813 | 0.521   | 0.799   | -0.279    | 5e-09            | NA                    | Hypomethylated in FP vs FN |
| cg05277425 | 0.325   | 0.687   | -0.362    | 5e-09            | NA                    | Hypomethylated in FP vs FN |
| cg05942111 | 0.535   | 0.838   | -0.302    | 5e-09            | NA                    | Hypomethylated in FP vs FN |
| cg17831002 | 0.126   | 0.412   | -0.287    | 5e-09            | TMEM91                | Hypomethylated in FP vs FN |
| cg24453600 | 0.496   | 0.827   | -0.331    | 5e-09            | NA                    | Hypomethylated in FP vs FN |
| cg00530825 | 0.541   | 0.880   | -0.339    | 5e-09            | NA                    | Hypomethylated in FP vs FN |
| cg23627948 | 0.341   | 0.712   | -0.371    | 6e-09            | NA                    | Hypomethylated in FP vs FN |
| cg25911257 | 0.551   | 0.860   | -0.309    | 6e-09            | NA                    | Hypomethylated in FP vs FN |
| cg27451587 | 0.391   | 0.754   | -0.363    | 6e-09            | SEC16B                | Hypomethylated in FP vs FN |
| cg25367332 | 0.504   | 0.796   | -0.292    | 6e-09            | NA                    | Hypomethylated in FP vs FN |
| cg03690956 | 0.470   | 0.811   | -0.341    | 6e-09            | NA                    | Hypomethylated in FP vs FN |
| cg09375892 | 0.577   | 0.913   | -0.336    | 6e-09            | NA                    | Hypomethylated in FP vs FN |

### Supplementary Table 7 (continued)

| Probe      | FP.mean | FN.mean | Mean.diff | Adjusted.P.value | Promoter.related.gene | Category                   |
|------------|---------|---------|-----------|------------------|-----------------------|----------------------------|
| cg26804891 | 0.396   | 0.714   | -0.318    | 6e-09            | NA                    | Hypomethylated in FP vs FN |
| cg11176737 | 0.360   | 0.736   | -0.376    | 6e-09            | KCNA5                 | Hypomethylated in FP vs FN |
| cg10113820 | 0.445   | 0.865   | -0.420    | 6e-09            | NA                    | Hypomethylated in FP vs FN |
| cg15969431 | 0.455   | 0.799   | -0.344    | 6e-09            | NA                    | Hypomethylated in FP vs FN |
| cg25729585 | 0.480   | 0.858   | -0.378    | 6e-09            | MYOG                  | Hypomethylated in FP vs FN |
| cg24747537 | 0.332   | 0.643   | -0.311    | 6e-09            | NA                    | Hypomethylated in FP vs FN |
| cg00936935 | 0.274   | 0.657   | -0.383    | 6e-09            | NA                    | Hypomethylated in FP vs FN |
| cg07685180 | 0.514   | 0.835   | -0.322    | 6e-09            | NA                    | Hypomethylated in FP vs FN |
| cg10357909 | 0.536   | 0.818   | -0.281    | 6e-09            | NA                    | Hypomethylated in FP vs FN |
| cg26221342 | 0.508   | 0.838   | -0.330    | 6e-09            | NA                    | Hypomethylated in FP vs FN |
| cg02075590 | 0.485   | 0.842   | -0.357    | 6e-09            | NA                    | Hypomethylated in FP vs FN |
| cg24389488 | 0.266   | 0.675   | -0.409    | 6e-09            | NA                    | Hypomethylated in FP vs FN |
| cg06768437 | 0.457   | 0.804   | -0.346    | 6e-09            | NA                    | Hypomethylated in FP vs FN |
| cg03036398 | 0.339   | 0.763   | -0.424    | 6e-09            | NA                    | Hypomethylated in FP vs FN |
| cg22693055 | 0.410   | 0.814   | -0.404    | 6e-09            | NA                    | Hypomethylated in FP vs FN |
| cg01894895 | 0.575   | 0.882   | -0.306    | 6e-09            | ANXA1                 | Hypomethylated in FP vs FN |
| cg09396676 | 0.412   | 0.801   | -0.389    | 6e-09            | NA                    | Hypomethylated in FP vs FN |
| cg02536026 | 0.120   | 0.529   | -0.410    | 7e-09            | ARRB1                 | Hypomethylated in FP vs FN |
| cg13784017 | 0.450   | 0.758   | -0.308    | 7e-09            | NA                    | Hypomethylated in FP vs FN |
| cg14496282 | 0.273   | 0.786   | -0.513    | 7e-09            | NA                    | Hypomethylated in FP vs FN |
| cg03463994 | 0.340   | 0.713   | -0.374    | 7e-09            | NA                    | Hypomethylated in FP vs FN |
| cg13215862 | 0.151   | 0.477   | -0.326    | 7e-09            | NA                    | Hypomethylated in FP vs FN |
| cg13964030 | 0.233   | 0.657   | -0.424    | 7e-09            | NA                    | Hypomethylated in FP vs FN |
| cg01615861 | 0.280   | 0.754   | -0.474    | 7e-09            | NA                    | Hypomethylated in FP vs FN |
| cg19968840 | 0.097   | 0.663   | -0.566    | 7e-09            | NA                    | Hypomethylated in FP vs FN |



### Supplementary Table 7 (continued)

| Probe      | FP.mean | FN.mean | Mean.diff | Adjusted.P.value | Promoter.related.gene | Category                   |
|------------|---------|---------|-----------|------------------|-----------------------|----------------------------|
| cg17596058 | 0.467   | 0.807   | -0.340    | 7e-09            | NA                    | Hypomethylated in FP vs FN |
| cg00250422 | 0.133   | 0.684   | -0.551    | 7e-09            | NA                    | Hypomethylated in FP vs FN |
| cg04398282 | 0.318   | 0.660   | -0.342    | 7e-09            | STAP1                 | Hypomethylated in FP vs FN |
| cg08326019 | 0.334   | 0.819   | -0.484    | 7e-09            | NA                    | Hypomethylated in FP vs FN |
| cg05247096 | 0.329   | 0.756   | -0.427    | 7e-09            | NA                    | Hypomethylated in FP vs FN |
| cg00575090 | 0.383   | 0.733   | -0.350    | 7e-09            | NA                    | Hypomethylated in FP vs FN |
| cg10077765 | 0.402   | 0.811   | -0.409    | 7e-09            | NA                    | Hypomethylated in FP vs FN |
| cg09505340 | 0.491   | 0.844   | -0.353    | 7e-09            | NA                    | Hypomethylated in FP vs FN |
| cg15770125 | 0.373   | 0.669   | -0.296    | 7e-09            | C3orf32               | Hypomethylated in FP vs FN |
| cg19183252 | 0.301   | 0.735   | -0.435    | 7e-09            | NA                    | Hypomethylated in FP vs FN |
| cg21597692 | 0.331   | 0.726   | -0.395    | 7e-09            | NA                    | Hypomethylated in FP vs FN |
| cg10888242 | 0.275   | 0.699   | -0.425    | 7e-09            | NA                    | Hypomethylated in FP vs FN |
| cg03814390 | 0.085   | 0.579   | -0.494    | 7e-09            | NA                    | Hypomethylated in FP vs FN |
| cg08860136 | 0.240   | 0.648   | -0.408    | 7e-09            | NA                    | Hypomethylated in FP vs FN |
| cg11584098 | 0.393   | 0.743   | -0.350    | 7e-09            | NA                    | Hypomethylated in FP vs FN |
| cg07285148 | 0.433   | 0.842   | -0.408    | 7e-09            | NA                    | Hypomethylated in FP vs FN |
| cg16475712 | 0.391   | 0.742   | -0.352    | 7e-09            | NA                    | Hypomethylated in FP vs FN |
| cg00518266 | 0.196   | 0.473   | -0.276    | 7e-09            | NA                    | Hypomethylated in FP vs FN |
| cg11633461 | 0.300   | 0.601   | -0.301    | 7e-09            | C10orf54              | Hypomethylated in FP vs FN |
| cg22846966 | 0.495   | 0.843   | -0.348    | 7e-09            | NA                    | Hypomethylated in FP vs FN |
| cg17796593 | 0.452   | 0.779   | -0.327    | 8e-09            | NA                    | Hypomethylated in FP vs FN |
| cg14823740 | 0.295   | 0.710   | -0.415    | 8e-09            | NA                    | Hypomethylated in FP vs FN |
| cg26220838 | 0.361   | 0.675   | -0.314    | 8e-09            | NA                    | Hypomethylated in FP vs FN |
| cg01961211 | 0.539   | 0.852   | -0.313    | 8e-09            | NA                    | Hypomethylated in FP vs FN |
| cg07867517 | 0.319   | 0.709   | -0.389    | 8e-09            | NA                    | Hypomethylated in FP vs FN |

### Supplementary Table 7 (continued)

| Probe      | FP.mean | FN.mean | Mean.diff | Adjusted.P.value | Promoter.related.gene | Category                   |
|------------|---------|---------|-----------|------------------|-----------------------|----------------------------|
| cg15083845 | 0.335   | 0.742   | -0.407    | 8e-09            | SLC12A7               | Hypomethylated in FP vs FN |
| cg24723731 | 0.437   | 0.816   | -0.379    | 8e-09            | NA                    | Hypomethylated in FP vs FN |
| cg01376829 | 0.158   | 0.654   | -0.496    | 8e-09            | NA                    | Hypomethylated in FP vs FN |
| cg07710335 | 0.498   | 0.874   | -0.376    | 8e-09            | NA                    | Hypomethylated in FP vs FN |
| cg05508585 | 0.143   | 0.651   | -0.508    | 8e-09            | NA                    | Hypomethylated in FP vs FN |
| cg07733993 | 0.394   | 0.801   | -0.406    | 8e-09            | NA                    | Hypomethylated in FP vs FN |
| cg19480937 | 0.579   | 0.870   | -0.290    | 8e-09            | NA                    | Hypomethylated in FP vs FN |
| cg07092111 | 0.369   | 0.752   | -0.383    | 8e-09            | NA                    | Hypomethylated in FP vs FN |
| cg01019875 | 0.091   | 0.644   | -0.553    | 8e-09            | NA                    | Hypomethylated in FP vs FN |
| cg11706790 | 0.401   | 0.802   | -0.401    | 8e-09            | NEU4                  | Hypomethylated in FP vs FN |
| cg08472222 | 0.483   | 0.858   | -0.376    | 8e-09            | NA                    | Hypomethylated in FP vs FN |
| cg22709362 | 0.379   | 0.743   | -0.364    | 8e-09            | NA                    | Hypomethylated in FP vs FN |
| cg22918560 | 0.352   | 0.802   | -0.451    | 9e-09            | NA                    | Hypomethylated in FP vs FN |
| cg17192599 | 0.603   | 0.865   | -0.262    | 9e-09            | NA                    | Hypomethylated in FP vs FN |
| cg07933234 | 0.326   | 0.646   | -0.319    | 9e-09            | NA                    | Hypomethylated in FP vs FN |
| cg23891273 | 0.271   | 0.740   | -0.469    | 9e-09            | NA                    | Hypomethylated in FP vs FN |
| cg17294620 | 0.435   | 0.739   | -0.304    | 9e-09            | NA                    | Hypomethylated in FP vs FN |
| cg22399646 | 0.394   | 0.735   | -0.341    | 9e-09            | NEU4                  | Hypomethylated in FP vs FN |
| cg04067066 | 0.338   | 0.621   | -0.283    | 9e-09            | NA                    | Hypomethylated in FP vs FN |
| cg22450662 | 0.357   | 0.717   | -0.359    | 9e-09            | NA                    | Hypomethylated in FP vs FN |
| cg06022561 | 0.325   | 0.660   | -0.335    | 9e-09            | NA                    | Hypomethylated in FP vs FN |
| cg14215338 | 0.464   | 0.901   | -0.436    | 9e-09            | NA                    | Hypomethylated in FP vs FN |
| cg26719625 | 0.530   | 0.816   | -0.286    | 9e-09            | NA                    | Hypomethylated in FP vs FN |
| cg26323077 | 0.528   | 0.844   | -0.316    | 9e-09            | NA                    | Hypomethylated in FP vs FN |
| cg03324884 | 0.452   | 0.831   | -0.379    | 9e-09            | NA                    | Hypomethylated in FP vs FN |

### Supplementary Table 7 (continued)

| Probe      | FP.mean | FN.mean | Mean.diff | Adjusted.P.value | Promoter.related.gene | Category                   |
|------------|---------|---------|-----------|------------------|-----------------------|----------------------------|
| cg14540913 | 0.298   | 0.623   | -0.325    | 1e-08            | NA                    | Hypomethylated in FP vs FN |
| cg25287071 | 0.386   | 0.730   | -0.344    | 1e-08            | NA                    | Hypomethylated in FP vs FN |
| cg15070897 | 0.483   | 0.795   | -0.312    | 1e-08            | SLC7A7                | Hypomethylated in FP vs FN |
| cg03997730 | 0.570   | 0.928   | -0.357    | 1e-08            | NA                    | Hypomethylated in FP vs FN |
| cg24164564 | 0.237   | 0.721   | -0.484    | 1e-08            | NA                    | Hypomethylated in FP vs FN |
| cg22449297 | 0.581   | 0.842   | -0.261    | 1e-08            | NA                    | Hypomethylated in FP vs FN |
| cg22931622 | 0.591   | 0.859   | -0.268    | 1e-08            | NA                    | Hypomethylated in FP vs FN |
| cg17924415 | 0.250   | 0.658   | -0.408    | 1e-08            | NA                    | Hypomethylated in FP vs FN |
| cg16069012 | 0.435   | 0.774   | -0.339    | 1e-08            | NA                    | Hypomethylated in FP vs FN |
| cg08436467 | 0.355   | 0.728   | -0.373    | 1e-08            | GNRH2                 | Hypomethylated in FP vs FN |
| cg05091653 | 0.124   | 0.419   | -0.295    | 1e-08            | NA                    | Hypomethylated in FP vs FN |
| cg21648401 | 0.438   | 0.777   | -0.339    | 1e-08            | SLC30A10              | Hypomethylated in FP vs FN |
| cg15908921 | 0.094   | 0.563   | -0.469    | 1e-08            | NA                    | Hypomethylated in FP vs FN |
| cg26416241 | 0.520   | 0.844   | -0.324    | 1e-08            | NA                    | Hypomethylated in FP vs FN |
| cg10502710 | 0.462   | 0.786   | -0.324    | 1e-08            | NA                    | Hypomethylated in FP vs FN |
| cg14578363 | 0.287   | 0.677   | -0.390    | 1e-08            | DBF4B                 | Hypomethylated in FP vs FN |
| cg24171689 | 0.530   | 0.824   | -0.294    | 1e-08            | NA                    | Hypomethylated in FP vs FN |
| cg14210130 | 0.589   | 0.840   | -0.251    | 1e-08            | NA                    | Hypomethylated in FP vs FN |
| cg11151314 | 0.563   | 0.929   | -0.366    | 1e-08            | NA                    | Hypomethylated in FP vs FN |
| cg01702225 | 0.448   | 0.844   | -0.396    | 1e-08            | NA                    | Hypomethylated in FP vs FN |
| cg06700146 | 0.117   | 0.566   | -0.450    | 1e-08            | BCL6B                 | Hypomethylated in FP vs FN |
| cg14862787 | 0.580   | 0.864   | -0.284    | 1e-08            | NA                    | Hypomethylated in FP vs FN |
| cg23203969 | 0.391   | 0.777   | -0.386    | 1e-08            | NA                    | Hypomethylated in FP vs FN |
| cg00137750 | 0.597   | 0.881   | -0.284    | 1e-08            | NA                    | Hypomethylated in FP vs FN |
| cg07131274 | 0.464   | 0.837   | -0.372    | 1e-08            | NA                    | Hypomethylated in FP vs FN |

### Supplementary Table 7 (continued)

| Probe      | FP.mean | FN.mean | Mean.diff | Adjusted.P.value | Promoter.related.gene | Category                   |
|------------|---------|---------|-----------|------------------|-----------------------|----------------------------|
| cg10985281 | 0.564   | 0.877   | -0.312    | 1e-08            | NA                    | Hypomethylated in FP vs FN |
| cg12242474 | 0.503   | 0.795   | -0.291    | 1e-08            | NA                    | Hypomethylated in FP vs FN |
| cg02836135 | 0.474   | 0.822   | -0.349    | 1e-08            | NA                    | Hypomethylated in FP vs FN |
| cg25825612 | 0.359   | 0.750   | -0.391    | 1e-08            | NA                    | Hypomethylated in FP vs FN |
| cg09159821 | 0.497   | 0.797   | -0.299    | 1e-08            | NA                    | Hypomethylated in FP vs FN |
| cg23597629 | 0.301   | 0.706   | -0.405    | 1e-08            | NA                    | Hypomethylated in FP vs FN |
| cg24136740 | 0.333   | 0.829   | -0.496    | 1e-08            | NA                    | Hypomethylated in FP vs FN |
| cg08066417 | 0.387   | 0.661   | -0.274    | 1e-08            | NA                    | Hypomethylated in FP vs FN |
| cg07024497 | 0.426   | 0.686   | -0.260    | 1e-08            | NA                    | Hypomethylated in FP vs FN |
| cg23381884 | 0.452   | 0.751   | -0.299    | 1e-08            | NA                    | Hypomethylated in FP vs FN |
| cg07355763 | 0.322   | 0.718   | -0.396    | 1e-08            | NA                    | Hypomethylated in FP vs FN |
| cg15426869 | 0.208   | 0.521   | -0.313    | 1e-08            | NA                    | Hypomethylated in FP vs FN |
| cg13315345 | 0.222   | 0.640   | -0.418    | 1e-08            | NA                    | Hypomethylated in FP vs FN |
| cg02221422 | 0.479   | 0.815   | -0.336    | 1e-08            | NA                    | Hypomethylated in FP vs FN |
| cg13425422 | 0.478   | 0.857   | -0.379    | 1e-08            | NA                    | Hypomethylated in FP vs FN |
| cg16362595 | 0.375   | 0.656   | -0.281    | 1e-08            | NA                    | Hypomethylated in FP vs FN |
| cg05467458 | 0.305   | 0.668   | -0.363    | 1e-08            | SLC7A9                | Hypomethylated in FP vs FN |
| cg12006284 | 0.267   | 0.714   | -0.447    | 1e-08            | NA                    | Hypomethylated in FP vs FN |
| cg23538755 | 0.576   | 0.832   | -0.256    | 1e-08            | NA                    | Hypomethylated in FP vs FN |
| cg02373104 | 0.548   | 0.816   | -0.268    | 1e-08            | NA                    | Hypomethylated in FP vs FN |
| cg02946204 | 0.337   | 0.782   | -0.445    | 1e-08            | NA                    | Hypomethylated in FP vs FN |
| cg04044684 | 0.178   | 0.673   | -0.495    | 1e-08            | CHFR                  | Hypomethylated in FP vs FN |
| cg11970192 | 0.159   | 0.635   | -0.476    | 1e-08            | NA                    | Hypomethylated in FP vs FN |
| cg09776463 | 0.268   | 0.723   | -0.455    | 1e-08            | NA                    | Hypomethylated in FP vs FN |
| cg11569478 | 0.519   | 0.808   | -0.289    | 1e-08            | NA                    | Hypomethylated in FP vs FN |

### Supplementary Table 7 (continued)

| Probe      | FP.mean | FN.mean | Mean.diff | Adjusted.P.value | Promoter.related.gene | Category                   |
|------------|---------|---------|-----------|------------------|-----------------------|----------------------------|
| cg12899747 | 0.264   | 0.696   | -0.431    | 1e-08            | NA                    | Hypomethylated in FP vs FN |
| cg27650212 | 0.363   | 0.817   | -0.454    | 1e-08            | SLC13A3               | Hypomethylated in FP vs FN |
| cg01052428 | 0.406   | 0.682   | -0.276    | 1e-08            | NA                    | Hypomethylated in FP vs FN |
| cg04282082 | 0.330   | 0.707   | -0.378    | 1e-08            | NA                    | Hypomethylated in FP vs FN |
| cg24194912 | 0.558   | 0.863   | -0.305    | 1e-08            | NA                    | Hypomethylated in FP vs FN |
| cg13842648 | 0.402   | 0.767   | -0.365    | 1e-08            | IL9                   | Hypomethylated in FP vs FN |
| cg11594934 | 0.553   | 0.821   | -0.268    | 1e-08            | RPAP1                 | Hypomethylated in FP vs FN |
| cg21817287 | 0.430   | 0.783   | -0.353    | 1e-08            | NA                    | Hypomethylated in FP vs FN |
| cg05069728 | 0.368   | 0.679   | -0.311    | 1e-08            | NA                    | Hypomethylated in FP vs FN |
| cg21810733 | 0.352   | 0.658   | -0.306    | 1e-08            | HDAC11                | Hypomethylated in FP vs FN |
| cg07973967 | 0.396   | 0.701   | -0.305    | 1e-08            | CD79B                 | Hypomethylated in FP vs FN |
| cg24067150 | 0.392   | 0.782   | -0.389    | 1e-08            | NA                    | Hypomethylated in FP vs FN |
| cg00093686 | 0.261   | 0.635   | -0.375    | 2e-08            | NA                    | Hypomethylated in FP vs FN |
| cg08932665 | 0.423   | 0.730   | -0.308    | 2e-08            | NA                    | Hypomethylated in FP vs FN |
| cg16795184 | 0.537   | 0.826   | -0.289    | 2e-08            | NA                    | Hypomethylated in FP vs FN |
| cg14290705 | 0.598   | 0.866   | -0.268    | 2e-08            | NA                    | Hypomethylated in FP vs FN |
| cg02890435 | 0.467   | 0.790   | -0.323    | 2e-08            | NA                    | Hypomethylated in FP vs FN |
| cg22817650 | 0.424   | 0.806   | -0.382    | 2e-08            | NA                    | Hypomethylated in FP vs FN |
| cg14644418 | 0.421   | 0.775   | -0.354    | 2e-08            | NA                    | Hypomethylated in FP vs FN |
| cg26168772 | 0.317   | 0.611   | -0.293    | 2e-08            | NA                    | Hypomethylated in FP vs FN |
| cg04696969 | 0.346   | 0.721   | -0.375    | 2e-08            | NA                    | Hypomethylated in FP vs FN |
| cg22495037 | 0.416   | 0.791   | -0.375    | 2e-08            | RNF150                | Hypomethylated in FP vs FN |
| cg18875607 | 0.562   | 0.836   | -0.274    | 2e-08            | NA                    | Hypomethylated in FP vs FN |
| cg08546494 | 0.153   | 0.673   | -0.519    | 2e-08            | NA                    | Hypomethylated in FP vs FN |
| cg15491567 | 0.249   | 0.567   | -0.319    | 2e-08            | DYSF                  | Hypomethylated in FP vs FN |

### Supplementary Table 7 (continued)

| Probe      | FP.mean | FN.mean | Mean.diff | Adjusted.P.value | Promoter.related.gene | Category                   |
|------------|---------|---------|-----------|------------------|-----------------------|----------------------------|
| cg07069342 | 0.350   | 0.768   | -0.418    | 2e-08            | NA                    | Hypomethylated in FP vs FN |
| cg16502826 | 0.367   | 0.707   | -0.340    | 2e-08            | NA                    | Hypomethylated in FP vs FN |
| cg26766373 | 0.389   | 0.716   | -0.328    | 2e-08            | ARRB1                 | Hypomethylated in FP vs FN |
| cg08360638 | 0.255   | 0.656   | -0.401    | 2e-08            | NA                    | Hypomethylated in FP vs FN |
| cg17208278 | 0.438   | 0.801   | -0.363    | 2e-08            | NA                    | Hypomethylated in FP vs FN |
| cg07166896 | 0.279   | 0.593   | -0.314    | 2e-08            | NA                    | Hypomethylated in FP vs FN |
| cg12964647 | 0.346   | 0.724   | -0.379    | 2e-08            | MIR1203               | Hypomethylated in FP vs FN |
| cg20596162 | 0.185   | 0.629   | -0.444    | 2e-08            | NA                    | Hypomethylated in FP vs FN |
| cg01311470 | 0.367   | 0.750   | -0.383    | 2e-08            | C9                    | Hypomethylated in FP vs FN |
| cg10803218 | 0.345   | 0.687   | -0.342    | 2e-08            | NA                    | Hypomethylated in FP vs FN |
| cg14633252 | 0.202   | 0.624   | -0.422    | 2e-08            | NA                    | Hypomethylated in FP vs FN |
| cg01551300 | 0.483   | 0.769   | -0.286    | 2e-08            | NA                    | Hypomethylated in FP vs FN |
| cg01194444 | 0.397   | 0.770   | -0.373    | 2e-08            | MYOG                  | Hypomethylated in FP vs FN |
| cg13542368 | 0.479   | 0.776   | -0.297    | 2e-08            | NA                    | Hypomethylated in FP vs FN |
| cg17661686 | 0.481   | 0.805   | -0.324    | 2e-08            | NA                    | Hypomethylated in FP vs FN |
| cg17907648 | 0.610   | 0.891   | -0.281    | 2e-08            | NA                    | Hypomethylated in FP vs FN |
| cg03649497 | 0.508   | 0.787   | -0.279    | 2e-08            | NA                    | Hypomethylated in FP vs FN |
| cg02660541 | 0.538   | 0.801   | -0.263    | 2e-08            | NA                    | Hypomethylated in FP vs FN |
| cg01314439 | 0.586   | 0.867   | -0.281    | 2e-08            | NA                    | Hypomethylated in FP vs FN |
| cg09520126 | 0.599   | 0.908   | -0.309    | 2e-08            | NA                    | Hypomethylated in FP vs FN |
| cg04737114 | 0.163   | 0.533   | -0.371    | 2e-08            | DLX5                  | Hypomethylated in FP vs FN |
| cg26714263 | 0.469   | 0.813   | -0.344    | 2e-08            | NA                    | Hypomethylated in FP vs FN |
| cg05279172 | 0.345   | 0.695   | -0.350    | 2e-08            | NA                    | Hypomethylated in FP vs FN |
| cg23240171 | 0.446   | 0.801   | -0.356    | 2e-08            | NA                    | Hypomethylated in FP vs FN |
| cg01405685 | 0.407   | 0.774   | -0.368    | 2e-08            | NA                    | Hypomethylated in FP vs FN |

### Supplementary Table 7 (continued)

| Probe      | FP.mean | FN.mean | Mean.diff | Adjusted.P.value | Promoter.related.gene | Category                   |
|------------|---------|---------|-----------|------------------|-----------------------|----------------------------|
| cg10420310 | 0.215   | 0.635   | -0.420    | 2e-08            | MIR193B               | Hypomethylated in FP vs FN |
| cg03295417 | 0.335   | 0.735   | -0.400    | 2e-08            | NA                    | Hypomethylated in FP vs FN |
| cg02648057 | 0.256   | 0.647   | -0.391    | 2e-08            | NA                    | Hypomethylated in FP vs FN |
| cg07107976 | 0.525   | 0.804   | -0.280    | 2e-08            | NA                    | Hypomethylated in FP vs FN |
| cg04560015 | 0.383   | 0.708   | -0.325    | 2e-08            | NA                    | Hypomethylated in FP vs FN |
| cg16311946 | 0.372   | 0.754   | -0.381    | 2e-08            | NA                    | Hypomethylated in FP vs FN |
| cg07524679 | 0.449   | 0.798   | -0.349    | 2e-08            | NA                    | Hypomethylated in FP vs FN |
| cg07224114 | 0.317   | 0.736   | -0.419    | 2e-08            | NA                    | Hypomethylated in FP vs FN |
| cg25978218 | 0.378   | 0.719   | -0.340    | 2e-08            | NA                    | Hypomethylated in FP vs FN |
| cg18047662 | 0.248   | 0.738   | -0.490    | 2e-08            | FOXI2                 | Hypomethylated in FP vs FN |
| cg26543989 | 0.456   | 0.776   | -0.320    | 2e-08            | NA                    | Hypomethylated in FP vs FN |
| cg23078228 | 0.590   | 0.854   | -0.264    | 2e-08            | NA                    | Hypomethylated in FP vs FN |
| cg15056803 | 0.544   | 0.855   | -0.311    | 2e-08            | NA                    | Hypomethylated in FP vs FN |
| cg00239117 | 0.514   | 0.876   | -0.362    | 2e-08            | NA                    | Hypomethylated in FP vs FN |
| cg25341268 | 0.386   | 0.730   | -0.344    | 2e-08            | NA                    | Hypomethylated in FP vs FN |
| cg17130788 | 0.485   | 0.855   | -0.370    | 2e-08            | NA                    | Hypomethylated in FP vs FN |
| cg00059662 | 0.397   | 0.736   | -0.339    | 2e-08            | NA                    | Hypomethylated in FP vs FN |
| cg17780565 | 0.382   | 0.728   | -0.347    | 2e-08            | NA                    | Hypomethylated in FP vs FN |
| cg14434412 | 0.265   | 0.708   | -0.443    | 2e-08            | NA                    | Hypomethylated in FP vs FN |
| cg04843252 | 0.180   | 0.628   | -0.447    | 2e-08            | NA                    | Hypomethylated in FP vs FN |
| cg07209987 | 0.363   | 0.810   | -0.447    | 2e-08            | NA                    | Hypomethylated in FP vs FN |
| cg24815934 | 0.403   | 0.744   | -0.340    | 2e-08            | NA                    | Hypomethylated in FP vs FN |
| cg00406542 | 0.189   | 0.605   | -0.417    | 2e-08            | NA                    | Hypomethylated in FP vs FN |
| cg14776168 | 0.430   | 0.776   | -0.346    | 2e-08            | NA                    | Hypomethylated in FP vs FN |
| cg00413380 | 0.544   | 0.810   | -0.266    | 2e-08            | NA                    | Hypomethylated in FP vs FN |

**Supplementary Table 7 (continued)**

| Probe      | FP.mean | FN.mean | Mean.diff | Adjusted.P.value | Promoter.related.gene | Category                   |
|------------|---------|---------|-----------|------------------|-----------------------|----------------------------|
| cg14054620 | 0.291   | 0.618   | -0.327    | 2e-08            | NA                    | Hypomethylated in FP vs FN |
| cg26379845 | 0.343   | 0.728   | -0.386    | 2e-08            | NA                    | Hypomethylated in FP vs FN |
| cg21397848 | 0.463   | 0.781   | -0.318    | 2e-08            | NA                    | Hypomethylated in FP vs FN |
| cg02556363 | 0.570   | 0.842   | -0.272    | 2e-08            | NA                    | Hypomethylated in FP vs FN |
| cg15291308 | 0.429   | 0.756   | -0.327    | 2e-08            | NA                    | Hypomethylated in FP vs FN |
| cg11353035 | 0.214   | 0.624   | -0.410    | 2e-08            | BCL6B                 | Hypomethylated in FP vs FN |
| cg22250556 | 0.365   | 0.741   | -0.375    | 2e-08            | NA                    | Hypomethylated in FP vs FN |
| cg07408989 | 0.534   | 0.840   | -0.307    | 2e-08            | NA                    | Hypomethylated in FP vs FN |
| cg23620047 | 0.563   | 0.825   | -0.261    | 2e-08            | NA                    | Hypomethylated in FP vs FN |
| cg05240479 | 0.055   | 0.557   | -0.501    | 2e-08            | MLPH                  | Hypomethylated in FP vs FN |
| cg05011348 | 0.544   | 0.832   | -0.288    | 2e-08            | NA                    | Hypomethylated in FP vs FN |
| cg06484274 | 0.179   | 0.493   | -0.314    | 2e-08            | NA                    | Hypomethylated in FP vs FN |
| cg16312872 | 0.492   | 0.778   | -0.286    | 2e-08            | NA                    | Hypomethylated in FP vs FN |
| cg24390913 | 0.191   | 0.691   | -0.500    | 2e-08            | NA                    | Hypomethylated in FP vs FN |
| cg20297053 | 0.327   | 0.653   | -0.327    | 2e-08            | NA                    | Hypomethylated in FP vs FN |
| cg20507066 | 0.438   | 0.743   | -0.305    | 2e-08            | NA                    | Hypomethylated in FP vs FN |
| cg00652772 | 0.360   | 0.724   | -0.364    | 2e-08            | NA                    | Hypomethylated in FP vs FN |
| cg03939897 | 0.552   | 0.835   | -0.283    | 2e-08            | NA                    | Hypomethylated in FP vs FN |
| cg27285599 | 0.459   | 0.807   | -0.348    | 2e-08            | ZNF750                | Hypomethylated in FP vs FN |
| cg06447424 | 0.366   | 0.737   | -0.372    | 2e-08            | NA                    | Hypomethylated in FP vs FN |
| cg04809990 | 0.431   | 0.772   | -0.341    | 2e-08            | OTOR                  | Hypomethylated in FP vs FN |
| cg25680486 | 0.221   | 0.588   | -0.367    | 2e-08            | NA                    | Hypomethylated in FP vs FN |
| cg08156844 | 0.474   | 0.837   | -0.364    | 2e-08            | NA                    | Hypomethylated in FP vs FN |
| cg01046905 | 0.480   | 0.820   | -0.340    | 2e-08            | NA                    | Hypomethylated in FP vs FN |
| cg03758241 | 0.562   | 0.865   | -0.303    | 2e-08            | NA                    | Hypomethylated in FP vs FN |



### Supplementary Table 7 (continued)

| Probe      | FP.mean | FN.mean | Mean.diff | Adjusted.P.value | Promoter.related.gene | Category                   |
|------------|---------|---------|-----------|------------------|-----------------------|----------------------------|
| cg08480774 | 0.635   | 0.906   | -0.271    | 2e-08            | NA                    | Hypomethylated in FP vs FN |
| cg17671199 | 0.429   | 0.780   | -0.351    | 2e-08            | NA                    | Hypomethylated in FP vs FN |
| cg10242198 | 0.390   | 0.788   | -0.398    | 2e-08            | NA                    | Hypomethylated in FP vs FN |
| cg25944620 | 0.549   | 0.815   | -0.266    | 2e-08            | MYOZ1                 | Hypomethylated in FP vs FN |
| cg15208525 | 0.430   | 0.705   | -0.275    | 2e-08            | NA                    | Hypomethylated in FP vs FN |
| cg10825839 | 0.203   | 0.485   | -0.283    | 2e-08            | NA                    | Hypomethylated in FP vs FN |
| cg04562611 | 0.573   | 0.830   | -0.257    | 2e-08            | NA                    | Hypomethylated in FP vs FN |
| cg17756730 | 0.335   | 0.682   | -0.347    | 2e-08            | NA                    | Hypomethylated in FP vs FN |
| cg15014458 | 0.222   | 0.689   | -0.468    | 2e-08            | LYPD3                 | Hypomethylated in FP vs FN |
| cg22588983 | 0.308   | 0.722   | -0.414    | 2e-08            | NA                    | Hypomethylated in FP vs FN |
| cg04216073 | 0.372   | 0.719   | -0.347    | 2e-08            | NA                    | Hypomethylated in FP vs FN |
| cg26854559 | 0.373   | 0.818   | -0.445    | 2e-08            | NA                    | Hypomethylated in FP vs FN |
| cg18454120 | 0.567   | 0.821   | -0.254    | 2e-08            | NA                    | Hypomethylated in FP vs FN |
| cg08645207 | 0.550   | 0.844   | -0.294    | 2e-08            | NA                    | Hypomethylated in FP vs FN |
| cg14527333 | 0.315   | 0.622   | -0.307    | 2e-08            | NA                    | Hypomethylated in FP vs FN |
| cg24631518 | 0.619   | 0.900   | -0.281    | 3e-08            | NA                    | Hypomethylated in FP vs FN |
| cg16012690 | 0.288   | 0.675   | -0.387    | 3e-08            | NA                    | Hypomethylated in FP vs FN |
| cg00665106 | 0.222   | 0.525   | -0.303    | 3e-08            | NA                    | Hypomethylated in FP vs FN |
| cg12424646 | 0.415   | 0.740   | -0.325    | 3e-08            | NA                    | Hypomethylated in FP vs FN |
| cg08053129 | 0.522   | 0.832   | -0.309    | 3e-08            | NA                    | Hypomethylated in FP vs FN |
| cg10688790 | 0.516   | 0.835   | -0.320    | 3e-08            | MIR548F3              | Hypomethylated in FP vs FN |
| cg01987516 | 0.330   | 0.778   | -0.448    | 3e-08            | NA                    | Hypomethylated in FP vs FN |
| cg15219347 | 0.206   | 0.515   | -0.308    | 3e-08            | PLVAP                 | Hypomethylated in FP vs FN |
| cg05884394 | 0.122   | 0.653   | -0.531    | 3e-08            | DPY19L2P4             | Hypomethylated in FP vs FN |
| cg08875869 | 0.553   | 0.839   | -0.286    | 3e-08            | NA                    | Hypomethylated in FP vs FN |

### Supplementary Table 7 (continued)

| Probe      | FP.mean | FN.mean | Mean.diff | Adjusted.P.value | Promoter.related.gene | Category                   |
|------------|---------|---------|-----------|------------------|-----------------------|----------------------------|
| cg24700316 | 0.462   | 0.822   | -0.360    | 3e-08            | NA                    | Hypomethylated in FP vs FN |
| cg06726860 | 0.339   | 0.815   | -0.475    | 3e-08            | NA                    | Hypomethylated in FP vs FN |
| cg03541437 | 0.454   | 0.840   | -0.386    | 3e-08            | NA                    | Hypomethylated in FP vs FN |
| cg26394825 | 0.072   | 0.506   | -0.434    | 3e-08            | CHFR                  | Hypomethylated in FP vs FN |
| cg21100712 | 0.537   | 0.855   | -0.318    | 3e-08            | NA                    | Hypomethylated in FP vs FN |
| cg17444642 | 0.391   | 0.740   | -0.349    | 3e-08            | NA                    | Hypomethylated in FP vs FN |
| cg18861119 | 0.392   | 0.747   | -0.356    | 3e-08            | NA                    | Hypomethylated in FP vs FN |
| cg05612608 | 0.469   | 0.761   | -0.292    | 3e-08            | NA                    | Hypomethylated in FP vs FN |
| cg26277556 | 0.341   | 0.724   | -0.383    | 3e-08            | NA                    | Hypomethylated in FP vs FN |
| cg00203736 | 0.436   | 0.778   | -0.342    | 3e-08            | NA                    | Hypomethylated in FP vs FN |
| cg27365295 | 0.515   | 0.862   | -0.347    | 3e-08            | NA                    | Hypomethylated in FP vs FN |
| cg08306076 | 0.400   | 0.761   | -0.361    | 3e-08            | NA                    | Hypomethylated in FP vs FN |
| cg00432262 | 0.460   | 0.808   | -0.348    | 3e-08            | NA                    | Hypomethylated in FP vs FN |
| cg07157169 | 0.433   | 0.743   | -0.310    | 3e-08            | CTXN3                 | Hypomethylated in FP vs FN |
| cg10179251 | 0.377   | 0.758   | -0.382    | 3e-08            | NA                    | Hypomethylated in FP vs FN |
| cg23093846 | 0.472   | 0.760   | -0.288    | 3e-08            | NA                    | Hypomethylated in FP vs FN |
| cg07665535 | 0.188   | 0.583   | -0.395    | 3e-08            | MIR193B               | Hypomethylated in FP vs FN |
| cg22542139 | 0.536   | 0.815   | -0.278    | 3e-08            | NA                    | Hypomethylated in FP vs FN |
| cg16595458 | 0.301   | 0.674   | -0.374    | 3e-08            | NA                    | Hypomethylated in FP vs FN |
| cg19523082 | 0.238   | 0.650   | -0.412    | 3e-08            | ARMC3                 | Hypomethylated in FP vs FN |
| cg20978460 | 0.490   | 0.863   | -0.372    | 3e-08            | NA                    | Hypomethylated in FP vs FN |
| cg15470344 | 0.543   | 0.812   | -0.269    | 3e-08            | MYOG                  | Hypomethylated in FP vs FN |
| cg06645674 | 0.288   | 0.628   | -0.341    | 3e-08            | NA                    | Hypomethylated in FP vs FN |
| cg00676988 | 0.488   | 0.759   | -0.272    | 3e-08            | NA                    | Hypomethylated in FP vs FN |
| cg10154973 | 0.498   | 0.759   | -0.261    | 3e-08            | NA                    | Hypomethylated in FP vs FN |

### Supplementary Table 7 (continued)

| Probe      | FP.mean | FN.mean | Mean.diff | Adjusted.P.value | Promoter.related.gene | Category                   |
|------------|---------|---------|-----------|------------------|-----------------------|----------------------------|
| cg20043679 | 0.345   | 0.695   | -0.350    | 3e-08            | LOC388965             | Hypomethylated in FP vs FN |
| cg23987336 | 0.152   | 0.469   | -0.316    | 3e-08            | NA                    | Hypomethylated in FP vs FN |
| cg01483824 | 0.448   | 0.870   | -0.422    | 3e-08            | NA                    | Hypomethylated in FP vs FN |
| cg22387323 | 0.420   | 0.808   | -0.388    | 3e-08            | NA                    | Hypomethylated in FP vs FN |
| cg16908552 | 0.487   | 0.841   | -0.354    | 3e-08            | NA                    | Hypomethylated in FP vs FN |
| cg11630242 | 0.269   | 0.710   | -0.441    | 3e-08            | AKAP10                | Hypomethylated in FP vs FN |
| cg22308101 | 0.535   | 0.872   | -0.337    | 3e-08            | NA                    | Hypomethylated in FP vs FN |
| cg22544679 | 0.380   | 0.773   | -0.392    | 3e-08            | NA                    | Hypomethylated in FP vs FN |
| cg01227084 | 0.319   | 0.711   | -0.392    | 3e-08            | NA                    | Hypomethylated in FP vs FN |
| cg01069468 | 0.481   | 0.741   | -0.261    | 3e-08            | NA                    | Hypomethylated in FP vs FN |
| cg06206471 | 0.139   | 0.590   | -0.451    | 3e-08            | NA                    | Hypomethylated in FP vs FN |
| cg23287005 | 0.533   | 0.911   | -0.377    | 3e-08            | NA                    | Hypomethylated in FP vs FN |
| cg24606533 | 0.560   | 0.813   | -0.254    | 3e-08            | NA                    | Hypomethylated in FP vs FN |
| cg25629938 | 0.567   | 0.844   | -0.277    | 3e-08            | RAB3IP                | Hypomethylated in FP vs FN |
| cg18794473 | 0.570   | 0.888   | -0.318    | 3e-08            | NA                    | Hypomethylated in FP vs FN |
| cg20691507 | 0.261   | 0.743   | -0.482    | 3e-08            | NA                    | Hypomethylated in FP vs FN |
| cg22370005 | 0.131   | 0.604   | -0.473    | 3e-08            | NA                    | Hypomethylated in FP vs FN |
| cg22390023 | 0.522   | 0.854   | -0.332    | 3e-08            | NA                    | Hypomethylated in FP vs FN |
| cg04470557 | 0.395   | 0.704   | -0.310    | 3e-08            | NA                    | Hypomethylated in FP vs FN |
| cg14575741 | 0.488   | 0.810   | -0.322    | 3e-08            | NA                    | Hypomethylated in FP vs FN |
| cg20400622 | 0.551   | 0.854   | -0.303    | 3e-08            | NA                    | Hypomethylated in FP vs FN |
| cg20745684 | 0.261   | 0.614   | -0.353    | 3e-08            | NA                    | Hypomethylated in FP vs FN |
| cg00988227 | 0.566   | 0.830   | -0.264    | 3e-08            | NA                    | Hypomethylated in FP vs FN |
| cg06563441 | 0.485   | 0.852   | -0.367    | 3e-08            | NA                    | Hypomethylated in FP vs FN |
| cg01108633 | 0.415   | 0.772   | -0.357    | 3e-08            | NA                    | Hypomethylated in FP vs FN |

### Supplementary Table 7 (continued)

| Probe      | FP.mean | FN.mean | Mean.diff | Adjusted.P.value | Promoter.related.gene | Category                   |
|------------|---------|---------|-----------|------------------|-----------------------|----------------------------|
| cg24360747 | 0.359   | 0.775   | -0.416    | 3e-08            | NA                    | Hypomethylated in FP vs FN |
| cg06134567 | 0.347   | 0.799   | -0.452    | 3e-08            | PKDREJ                | Hypomethylated in FP vs FN |
| cg14796230 | 0.612   | 0.874   | -0.263    | 3e-08            | NA                    | Hypomethylated in FP vs FN |
| cg11134246 | 0.436   | 0.723   | -0.287    | 3e-08            | NA                    | Hypomethylated in FP vs FN |
| cg24408200 | 0.402   | 0.716   | -0.314    | 3e-08            | NA                    | Hypomethylated in FP vs FN |
| cg03777681 | 0.506   | 0.811   | -0.305    | 3e-08            | C10orf62              | Hypomethylated in FP vs FN |
| cg17810211 | 0.455   | 0.829   | -0.374    | 3e-08            | NA                    | Hypomethylated in FP vs FN |
| cg09321758 | 0.212   | 0.623   | -0.411    | 3e-08            | NA                    | Hypomethylated in FP vs FN |
| cg08622369 | 0.565   | 0.858   | -0.294    | 3e-08            | NA                    | Hypomethylated in FP vs FN |
| cg25054390 | 0.364   | 0.710   | -0.346    | 3e-08            | GPR68                 | Hypomethylated in FP vs FN |
| cg08566882 | 0.447   | 0.802   | -0.355    | 3e-08            | NA                    | Hypomethylated in FP vs FN |
| cg23385847 | 0.295   | 0.699   | -0.404    | 3e-08            | NA                    | Hypomethylated in FP vs FN |
| cg24842816 | 0.517   | 0.823   | -0.306    | 3e-08            | NA                    | Hypomethylated in FP vs FN |
| cg04341806 | 0.422   | 0.794   | -0.372    | 4e-08            | LCP1                  | Hypomethylated in FP vs FN |
| cg14473030 | 0.398   | 0.746   | -0.348    | 4e-08            | NA                    | Hypomethylated in FP vs FN |
| cg01794501 | 0.181   | 0.534   | -0.352    | 4e-08            | NA                    | Hypomethylated in FP vs FN |
| cg20251943 | 0.210   | 0.627   | -0.417    | 4e-08            | NA                    | Hypomethylated in FP vs FN |
| cg19211915 | 0.249   | 0.630   | -0.381    | 4e-08            | NA                    | Hypomethylated in FP vs FN |
| cg01942543 | 0.519   | 0.797   | -0.279    | 4e-08            | NA                    | Hypomethylated in FP vs FN |
| cg02738205 | 0.368   | 0.757   | -0.389    | 4e-08            | NA                    | Hypomethylated in FP vs FN |
| cg09657673 | 0.404   | 0.705   | -0.301    | 4e-08            | NA                    | Hypomethylated in FP vs FN |
| cg08710564 | 0.424   | 0.786   | -0.362    | 4e-08            | NA                    | Hypomethylated in FP vs FN |
| cg16642938 | 0.559   | 0.845   | -0.285    | 4e-08            | NA                    | Hypomethylated in FP vs FN |
| cg26564172 | 0.278   | 0.655   | -0.377    | 4e-08            | NA                    | Hypomethylated in FP vs FN |
| cg14487111 | 0.289   | 0.639   | -0.350    | 4e-08            | NA                    | Hypomethylated in FP vs FN |

### Supplementary Table 7 (continued)

| Probe      | FP.mean | FN.mean | Mean.diff | Adjusted.P.value | Promoter.related.gene | Category                   |
|------------|---------|---------|-----------|------------------|-----------------------|----------------------------|
| cg00072675 | 0.552   | 0.865   | -0.312    | 4e-08            | NA                    | Hypomethylated in FP vs FN |
| cg14288424 | 0.408   | 0.723   | -0.315    | 4e-08            | NA                    | Hypomethylated in FP vs FN |
| cg07182163 | 0.419   | 0.785   | -0.366    | 4e-08            | NA                    | Hypomethylated in FP vs FN |
| cg27655507 | 0.280   | 0.665   | -0.385    | 4e-08            | NA                    | Hypomethylated in FP vs FN |
| cg15828353 | 0.319   | 0.689   | -0.370    | 4e-08            | NA                    | Hypomethylated in FP vs FN |
| cg00487737 | 0.144   | 0.566   | -0.422    | 4e-08            | ACP5                  | Hypomethylated in FP vs FN |
| cg06877848 | 0.516   | 0.842   | -0.326    | 4e-08            | NME2                  | Hypomethylated in FP vs FN |
| cg12238812 | 0.202   | 0.665   | -0.463    | 4e-08            | CHFR                  | Hypomethylated in FP vs FN |
| cg03076319 | 0.075   | 0.545   | -0.470    | 4e-08            | MLPH                  | Hypomethylated in FP vs FN |
| cg04031093 | 0.389   | 0.748   | -0.358    | 4e-08            | NA                    | Hypomethylated in FP vs FN |
| cg15425827 | 0.297   | 0.564   | -0.267    | 4e-08            | FAM83A                | Hypomethylated in FP vs FN |
| cg03501387 | 0.365   | 0.728   | -0.363    | 4e-08            | NA                    | Hypomethylated in FP vs FN |
| cg06693511 | 0.415   | 0.761   | -0.345    | 4e-08            | NA                    | Hypomethylated in FP vs FN |
| cg03625109 | 0.265   | 0.651   | -0.386    | 4e-08            | DBC1                  | Hypomethylated in FP vs FN |
| cg02145543 | 0.445   | 0.776   | -0.331    | 4e-08            | NA                    | Hypomethylated in FP vs FN |
| cg11605551 | 0.522   | 0.803   | -0.281    | 4e-08            | NA                    | Hypomethylated in FP vs FN |
| cg13048591 | 0.518   | 0.773   | -0.255    | 4e-08            | HSPB7                 | Hypomethylated in FP vs FN |
| cg19623054 | 0.566   | 0.875   | -0.309    | 4e-08            | NA                    | Hypomethylated in FP vs FN |
| cg13714378 | 0.473   | 0.811   | -0.338    | 4e-08            | NA                    | Hypomethylated in FP vs FN |
| cg19260606 | 0.448   | 0.823   | -0.375    | 4e-08            | NA                    | Hypomethylated in FP vs FN |
| cg14023389 | 0.401   | 0.756   | -0.356    | 4e-08            | NA                    | Hypomethylated in FP vs FN |
| cg20636559 | 0.442   | 0.814   | -0.372    | 4e-08            | NA                    | Hypomethylated in FP vs FN |
| cg17352583 | 0.483   | 0.735   | -0.252    | 4e-08            | NA                    | Hypomethylated in FP vs FN |
| cg14534144 | 0.353   | 0.816   | -0.463    | 4e-08            | NA                    | Hypomethylated in FP vs FN |
| cg01901434 | 0.407   | 0.726   | -0.319    | 4e-08            | NA                    | Hypomethylated in FP vs FN |

### Supplementary Table 7 (continued)

| Probe      | FP.mean | FN.mean | Mean.diff | Adjusted.P.value | Promoter.related.gene | Category                   |
|------------|---------|---------|-----------|------------------|-----------------------|----------------------------|
| cg23507051 | 0.305   | 0.699   | -0.394    | 4e-08            | NA                    | Hypomethylated in FP vs FN |
| cg12871652 | 0.379   | 0.733   | -0.354    | 4e-08            | NA                    | Hypomethylated in FP vs FN |
| cg10794733 | 0.487   | 0.765   | -0.277    | 4e-08            | NA                    | Hypomethylated in FP vs FN |
| cg18509239 | 0.516   | 0.853   | -0.338    | 4e-08            | IGSF10                | Hypomethylated in FP vs FN |
| cg14852384 | 0.078   | 0.444   | -0.366    | 4e-08            | ACTA1                 | Hypomethylated in FP vs FN |
| cg07044859 | 0.221   | 0.672   | -0.451    | 4e-08            | NA                    | Hypomethylated in FP vs FN |
| cg01493379 | 0.429   | 0.826   | -0.397    | 4e-08            | NA                    | Hypomethylated in FP vs FN |
| cg22755445 | 0.386   | 0.769   | -0.383    | 4e-08            | NA                    | Hypomethylated in FP vs FN |
| cg02363711 | 0.456   | 0.786   | -0.330    | 4e-08            | NA                    | Hypomethylated in FP vs FN |
| cg10767192 | 0.350   | 0.722   | -0.372    | 4e-08            | NA                    | Hypomethylated in FP vs FN |
| cg19570321 | 0.346   | 0.755   | -0.409    | 5e-08            | NA                    | Hypomethylated in FP vs FN |
| cg24820809 | 0.545   | 0.877   | -0.332    | 5e-08            | MB                    | Hypomethylated in FP vs FN |
| cg15165676 | 0.335   | 0.663   | -0.327    | 5e-08            | BCL6B                 | Hypomethylated in FP vs FN |
| cg06986584 | 0.672   | 0.950   | -0.278    | 5e-08            | NA                    | Hypomethylated in FP vs FN |
| cg18074297 | 0.107   | 0.571   | -0.463    | 5e-08            | CLIC6                 | Hypomethylated in FP vs FN |
| cg16608731 | 0.333   | 0.643   | -0.310    | 5e-08            | NA                    | Hypomethylated in FP vs FN |
| cg15584194 | 0.329   | 0.671   | -0.343    | 5e-08            | NA                    | Hypomethylated in FP vs FN |
| cg07569385 | 0.207   | 0.543   | -0.336    | 5e-08            | NA                    | Hypomethylated in FP vs FN |
| cg03980424 | 0.325   | 0.718   | -0.393    | 5e-08            | NA                    | Hypomethylated in FP vs FN |
| cg19200589 | 0.086   | 0.633   | -0.547    | 5e-08            | CLIC6                 | Hypomethylated in FP vs FN |
| cg07485198 | 0.321   | 0.703   | -0.382    | 5e-08            | NA                    | Hypomethylated in FP vs FN |
| cg19522050 | 0.338   | 0.746   | -0.408    | 5e-08            | NA                    | Hypomethylated in FP vs FN |
| cg11703722 | 0.438   | 0.751   | -0.312    | 5e-08            | LOC389333             | Hypomethylated in FP vs FN |
| cg17402907 | 0.456   | 0.735   | -0.279    | 5e-08            | NA                    | Hypomethylated in FP vs FN |
| cg03488588 | 0.495   | 0.792   | -0.298    | 5e-08            | NA                    | Hypomethylated in FP vs FN |

### Supplementary Table 7 (continued)

| Probe      | FP.mean | FN.mean | Mean.diff | Adjusted.P.value | Promoter.related.gene | Category                   |
|------------|---------|---------|-----------|------------------|-----------------------|----------------------------|
| cg14445814 | 0.139   | 0.480   | -0.341    | 5e-08            | DBC1                  | Hypomethylated in FP vs FN |
| cg01313538 | 0.564   | 0.817   | -0.252    | 5e-08            | KCNMB2                | Hypomethylated in FP vs FN |
| cg18076767 | 0.615   | 0.887   | -0.272    | 5e-08            | NA                    | Hypomethylated in FP vs FN |
| cg01105375 | 0.505   | 0.771   | -0.265    | 5e-08            | NA                    | Hypomethylated in FP vs FN |
| cg05505545 | 0.323   | 0.632   | -0.309    | 5e-08            | NA                    | Hypomethylated in FP vs FN |
| cg08234618 | 0.534   | 0.804   | -0.270    | 5e-08            | TF                    | Hypomethylated in FP vs FN |
| cg16759204 | 0.421   | 0.679   | -0.258    | 5e-08            | TJAP1                 | Hypomethylated in FP vs FN |
| cg24720583 | 0.187   | 0.641   | -0.454    | 5e-08            | BCL6B                 | Hypomethylated in FP vs FN |
| cg17170442 | 0.421   | 0.769   | -0.349    | 5e-08            | NA                    | Hypomethylated in FP vs FN |
| cg20866075 | 0.311   | 0.761   | -0.450    | 5e-08            | NA                    | Hypomethylated in FP vs FN |
| cg04200485 | 0.458   | 0.840   | -0.381    | 5e-08            | NA                    | Hypomethylated in FP vs FN |
| cg18199992 | 0.428   | 0.805   | -0.377    | 5e-08            | NA                    | Hypomethylated in FP vs FN |
| cg19905856 | 0.192   | 0.595   | -0.403    | 5e-08            | NA                    | Hypomethylated in FP vs FN |
| cg17406412 | 0.570   | 0.840   | -0.269    | 5e-08            | NA                    | Hypomethylated in FP vs FN |
| cg18128976 | 0.532   | 0.818   | -0.286    | 5e-08            | NA                    | Hypomethylated in FP vs FN |
| cg08858245 | 0.485   | 0.775   | -0.290    | 5e-08            | NA                    | Hypomethylated in FP vs FN |
| cg00967123 | 0.299   | 0.602   | -0.304    | 5e-08            | NA                    | Hypomethylated in FP vs FN |
| cg05556923 | 0.348   | 0.777   | -0.429    | 5e-08            | NA                    | Hypomethylated in FP vs FN |
| cg16217297 | 0.417   | 0.832   | -0.416    | 5e-08            | NA                    | Hypomethylated in FP vs FN |
| cg06998224 | 0.467   | 0.799   | -0.332    | 5e-08            | NA                    | Hypomethylated in FP vs FN |
| cg11042373 | 0.548   | 0.843   | -0.295    | 5e-08            | NA                    | Hypomethylated in FP vs FN |
| cg25135333 | 0.613   | 0.872   | -0.258    | 5e-08            | SEC16B                | Hypomethylated in FP vs FN |
| cg01028223 | 0.461   | 0.803   | -0.342    | 5e-08            | C7orf20               | Hypomethylated in FP vs FN |
| cg12255774 | 0.595   | 0.857   | -0.262    | 5e-08            | NA                    | Hypomethylated in FP vs FN |
| cg01935400 | 0.566   | 0.844   | -0.277    | 5e-08            | NA                    | Hypomethylated in FP vs FN |

### Supplementary Table 7 (continued)

| Probe      | FP.mean | FN.mean | Mean.diff | Adjusted.P.value | Promoter.related.gene | Category                   |
|------------|---------|---------|-----------|------------------|-----------------------|----------------------------|
| cg03131767 | 0.506   | 0.809   | -0.303    | 5e-08            | NA                    | Hypomethylated in FP vs FN |
| cg07363144 | 0.259   | 0.563   | -0.304    | 5e-08            | NA                    | Hypomethylated in FP vs FN |
| cg24850474 | 0.235   | 0.529   | -0.293    | 5e-08            | NA                    | Hypomethylated in FP vs FN |
| cg07073999 | 0.270   | 0.621   | -0.351    | 5e-08            | NA                    | Hypomethylated in FP vs FN |
| cg08992911 | 0.107   | 0.560   | -0.452    | 5e-08            | MLPH                  | Hypomethylated in FP vs FN |
| cg21964466 | 0.517   | 0.817   | -0.301    | 5e-08            | NA                    | Hypomethylated in FP vs FN |
| cg07643267 | 0.236   | 0.627   | -0.391    | 5e-08            | LYPD3                 | Hypomethylated in FP vs FN |
| cg20436206 | 0.352   | 0.705   | -0.353    | 5e-08            | NA                    | Hypomethylated in FP vs FN |
| cg00608779 | 0.358   | 0.753   | -0.395    | 5e-08            | NA                    | Hypomethylated in FP vs FN |
| cg05664352 | 0.347   | 0.755   | -0.408    | 5e-08            | NA                    | Hypomethylated in FP vs FN |
| cg02817932 | 0.406   | 0.665   | -0.258    | 5e-08            | NA                    | Hypomethylated in FP vs FN |
| cg03171770 | 0.217   | 0.676   | -0.459    | 5e-08            | NA                    | Hypomethylated in FP vs FN |
| cg25916172 | 0.225   | 0.587   | -0.362    | 5e-08            | NA                    | Hypomethylated in FP vs FN |
| cg02095895 | 0.362   | 0.682   | -0.319    | 6e-08            | NA                    | Hypomethylated in FP vs FN |
| cg04586126 | 0.374   | 0.818   | -0.445    | 6e-08            | NA                    | Hypomethylated in FP vs FN |
| cg06697380 | 0.465   | 0.753   | -0.288    | 6e-08            | NA                    | Hypomethylated in FP vs FN |
| cg09234616 | 0.215   | 0.712   | -0.498    | 6e-08            | NA                    | Hypomethylated in FP vs FN |
| cg25305993 | 0.402   | 0.681   | -0.279    | 6e-08            | NA                    | Hypomethylated in FP vs FN |
| cg04382501 | 0.283   | 0.635   | -0.351    | 6e-08            | NA                    | Hypomethylated in FP vs FN |
| cg26362263 | 0.299   | 0.583   | -0.284    | 6e-08            | NA                    | Hypomethylated in FP vs FN |
| cg12167335 | 0.562   | 0.860   | -0.298    | 6e-08            | NA                    | Hypomethylated in FP vs FN |
| cg23735214 | 0.428   | 0.765   | -0.337    | 6e-08            | NA                    | Hypomethylated in FP vs FN |
| cg23117727 | 0.372   | 0.746   | -0.375    | 6e-08            | NA                    | Hypomethylated in FP vs FN |
| cg13013644 | 0.355   | 0.686   | -0.332    | 6e-08            | NA                    | Hypomethylated in FP vs FN |
| cg19587887 | 0.422   | 0.793   | -0.370    | 6e-08            | PSKH2                 | Hypomethylated in FP vs FN |



### Supplementary Table 7 (continued)

| Probe      | FP.mean | FN.mean | Mean.diff | Adjusted.P.value | Promoter.related.gene | Category                   |
|------------|---------|---------|-----------|------------------|-----------------------|----------------------------|
| cg22533573 | 0.182   | 0.454   | -0.271    | 6e-08            | NA                    | Hypomethylated in FP vs FN |
| cg10844382 | 0.510   | 0.803   | -0.293    | 6e-08            | NA                    | Hypomethylated in FP vs FN |
| cg13532185 | 0.558   | 0.831   | -0.273    | 6e-08            | NA                    | Hypomethylated in FP vs FN |
| cg27403628 | 0.314   | 0.697   | -0.382    | 6e-08            | BANF2                 | Hypomethylated in FP vs FN |
| cg21755755 | 0.383   | 0.767   | -0.384    | 6e-08            | NA                    | Hypomethylated in FP vs FN |
| cg14757107 | 0.326   | 0.658   | -0.332    | 6e-08            | NA                    | Hypomethylated in FP vs FN |
| cg06079710 | 0.230   | 0.632   | -0.402    | 6e-08            | RNLS                  | Hypomethylated in FP vs FN |
| cg18827501 | 0.596   | 0.876   | -0.279    | 6e-08            | NA                    | Hypomethylated in FP vs FN |
| cg25374161 | 0.412   | 0.754   | -0.341    | 6e-08            | NA                    | Hypomethylated in FP vs FN |
| cg08158160 | 0.523   | 0.775   | -0.252    | 6e-08            | NA                    | Hypomethylated in FP vs FN |
| cg06903465 | 0.497   | 0.820   | -0.323    | 6e-08            | NA                    | Hypomethylated in FP vs FN |
| cg20450318 | 0.430   | 0.803   | -0.373    | 6e-08            | NA                    | Hypomethylated in FP vs FN |
| cg12946214 | 0.089   | 0.358   | -0.269    | 6e-08            | TMEM91                | Hypomethylated in FP vs FN |
| cg22596932 | 0.524   | 0.826   | -0.303    | 6e-08            | NA                    | Hypomethylated in FP vs FN |
| cg04735773 | 0.468   | 0.816   | -0.348    | 6e-08            | NA                    | Hypomethylated in FP vs FN |
| cg23342718 | 0.364   | 0.788   | -0.424    | 6e-08            | NA                    | Hypomethylated in FP vs FN |
| cg26381919 | 0.333   | 0.681   | -0.349    | 6e-08            | NA                    | Hypomethylated in FP vs FN |
| cg09665571 | 0.504   | 0.759   | -0.255    | 6e-08            | NA                    | Hypomethylated in FP vs FN |
| cg12077460 | 0.344   | 0.695   | -0.352    | 6e-08            | NA                    | Hypomethylated in FP vs FN |
| cg12135286 | 0.581   | 0.876   | -0.295    | 6e-08            | NA                    | Hypomethylated in FP vs FN |
| cg14095283 | 0.420   | 0.762   | -0.342    | 6e-08            | PGBD5                 | Hypomethylated in FP vs FN |
| cg26832509 | 0.150   | 0.547   | -0.397    | 6e-08            | CHFR                  | Hypomethylated in FP vs FN |
| cg11911550 | 0.163   | 0.421   | -0.258    | 6e-08            | NA                    | Hypomethylated in FP vs FN |
| cg17205313 | 0.492   | 0.773   | -0.281    | 6e-08            | TTC39C                | Hypomethylated in FP vs FN |
| cg25683570 | 0.325   | 0.670   | -0.345    | 6e-08            | NA                    | Hypomethylated in FP vs FN |

**Supplementary Table 7 (continued)**

| <b>Probe</b> | <b>FP.mean</b> | <b>FN.mean</b> | <b>Mean.diff</b> | <b>Adjusted.P.value</b> | <b>Promoter.related.gene</b> | <b>Category</b>            |
|--------------|----------------|----------------|------------------|-------------------------|------------------------------|----------------------------|
| cg13461509   | 0.193          | 0.652          | -0.460           | 6e-08                   | ECHDC2                       | Hypomethylated in FP vs FN |
| cg17971129   | 0.379          | 0.726          | -0.346           | 6e-08                   | NA                           | Hypomethylated in FP vs FN |
| cg14096415   | 0.268          | 0.577          | -0.308           | 6e-08                   | NA                           | Hypomethylated in FP vs FN |
| cg06512350   | 0.415          | 0.805          | -0.390           | 6e-08                   | NA                           | Hypomethylated in FP vs FN |
| cg17375396   | 0.275          | 0.609          | -0.334           | 6e-08                   | NA                           | Hypomethylated in FP vs FN |
| cg27583655   | 0.359          | 0.693          | -0.334           | 6e-08                   | NA                           | Hypomethylated in FP vs FN |
| cg07974823   | 0.514          | 0.828          | -0.313           | 6e-08                   | NA                           | Hypomethylated in FP vs FN |
| cg08756898   | 0.469          | 0.804          | -0.335           | 6e-08                   | NA                           | Hypomethylated in FP vs FN |
| cg18371700   | 0.131          | 0.576          | -0.446           | 6e-08                   | CLIC6                        | Hypomethylated in FP vs FN |
| cg05051734   | 0.521          | 0.808          | -0.287           | 7e-08                   | NA                           | Hypomethylated in FP vs FN |
| cg07034276   | 0.601          | 0.865          | -0.263           | 7e-08                   | AQP6                         | Hypomethylated in FP vs FN |
| cg26740249   | 0.241          | 0.567          | -0.326           | 7e-08                   | NA                           | Hypomethylated in FP vs FN |
| cg01711572   | 0.361          | 0.699          | -0.338           | 7e-08                   | NA                           | Hypomethylated in FP vs FN |
| cg26820037   | 0.273          | 0.718          | -0.445           | 7e-08                   | NA                           | Hypomethylated in FP vs FN |
| cg24774396   | 0.488          | 0.771          | -0.283           | 7e-08                   | NA                           | Hypomethylated in FP vs FN |
| cg08369014   | 0.372          | 0.766          | -0.394           | 7e-08                   | NA                           | Hypomethylated in FP vs FN |
| cg05129489   | 0.367          | 0.775          | -0.408           | 7e-08                   | NA                           | Hypomethylated in FP vs FN |
| cg25530583   | 0.341          | 0.741          | -0.400           | 7e-08                   | SLC14A1                      | Hypomethylated in FP vs FN |
| cg05784148   | 0.440          | 0.770          | -0.329           | 7e-08                   | NA                           | Hypomethylated in FP vs FN |
| cg19894382   | 0.491          | 0.830          | -0.339           | 7e-08                   | NA                           | Hypomethylated in FP vs FN |
| cg24983716   | 0.493          | 0.839          | -0.345           | 7e-08                   | P2RY14                       | Hypomethylated in FP vs FN |
| cg25171348   | 0.343          | 0.653          | -0.310           | 7e-08                   | NA                           | Hypomethylated in FP vs FN |
| cg24412204   | 0.296          | 0.709          | -0.413           | 7e-08                   | NA                           | Hypomethylated in FP vs FN |
| cg05270866   | 0.522          | 0.806          | -0.284           | 7e-08                   | NA                           | Hypomethylated in FP vs FN |
| cg03380744   | 0.329          | 0.679          | -0.350           | 7e-08                   | NA                           | Hypomethylated in FP vs FN |

### Supplementary Table 7 (continued)

| Probe      | FP.mean | FN.mean | Mean.diff | Adjusted.P.value | Promoter.related.gene | Category                   |
|------------|---------|---------|-----------|------------------|-----------------------|----------------------------|
| cg03037856 | 0.393   | 0.747   | -0.353    | 7e-08            | NA                    | Hypomethylated in FP vs FN |
| cg26927807 | 0.464   | 0.816   | -0.352    | 7e-08            | BTBD2                 | Hypomethylated in FP vs FN |
| cg21886186 | 0.291   | 0.624   | -0.333    | 7e-08            | NA                    | Hypomethylated in FP vs FN |
| cg13782866 | 0.175   | 0.507   | -0.333    | 7e-08            | DISC1                 | Hypomethylated in FP vs FN |
| cg15063355 | 0.129   | 0.570   | -0.441    | 7e-08            | CHFR                  | Hypomethylated in FP vs FN |
| cg26418671 | 0.478   | 0.808   | -0.330    | 7e-08            | NA                    | Hypomethylated in FP vs FN |
| cg05487664 | 0.326   | 0.685   | -0.359    | 7e-08            | LRRC10B               | Hypomethylated in FP vs FN |
| cg17722435 | 0.405   | 0.706   | -0.301    | 7e-08            | NA                    | Hypomethylated in FP vs FN |
| cg25835568 | 0.441   | 0.778   | -0.337    | 7e-08            | NA                    | Hypomethylated in FP vs FN |
| cg25844471 | 0.521   | 0.778   | -0.257    | 7e-08            | C10orf67              | Hypomethylated in FP vs FN |
| cg26934759 | 0.445   | 0.806   | -0.361    | 7e-08            | NA                    | Hypomethylated in FP vs FN |
| cg16643706 | 0.275   | 0.684   | -0.408    | 7e-08            | NA                    | Hypomethylated in FP vs FN |
| cg26996175 | 0.243   | 0.647   | -0.404    | 7e-08            | NA                    | Hypomethylated in FP vs FN |
| cg18699524 | 0.596   | 0.859   | -0.264    | 7e-08            | NA                    | Hypomethylated in FP vs FN |
| cg18397743 | 0.268   | 0.582   | -0.313    | 7e-08            | NA                    | Hypomethylated in FP vs FN |
| cg03817675 | 0.292   | 0.649   | -0.357    | 7e-08            | NA                    | Hypomethylated in FP vs FN |
| cg05144285 | 0.312   | 0.692   | -0.380    | 7e-08            | NA                    | Hypomethylated in FP vs FN |
| cg10504150 | 0.347   | 0.674   | -0.327    | 7e-08            | NEU4                  | Hypomethylated in FP vs FN |
| cg07493307 | 0.585   | 0.841   | -0.257    | 8e-08            | NA                    | Hypomethylated in FP vs FN |
| cg07704627 | 0.243   | 0.577   | -0.335    | 8e-08            | NA                    | Hypomethylated in FP vs FN |
| cg20304290 | 0.478   | 0.774   | -0.296    | 8e-08            | NA                    | Hypomethylated in FP vs FN |
| cg00802510 | 0.342   | 0.757   | -0.415    | 8e-08            | NA                    | Hypomethylated in FP vs FN |
| cg07526905 | 0.529   | 0.808   | -0.279    | 8e-08            | RGS12                 | Hypomethylated in FP vs FN |
| cg25859972 | 0.253   | 0.679   | -0.426    | 8e-08            | NA                    | Hypomethylated in FP vs FN |
| cg26656452 | 0.387   | 0.766   | -0.380    | 8e-08            | NA                    | Hypomethylated in FP vs FN |

### Supplementary Table 7 (continued)

| Probe      | FP.mean | FN.mean | Mean.diff | Adjusted.P.value | Promoter.related.gene | Category                   |
|------------|---------|---------|-----------|------------------|-----------------------|----------------------------|
| cg12052250 | 0.342   | 0.735   | -0.393    | 8e-08            | NA                    | Hypomethylated in FP vs FN |
| cg08222618 | 0.307   | 0.708   | -0.400    | 8e-08            | NA                    | Hypomethylated in FP vs FN |
| cg22235258 | 0.353   | 0.706   | -0.353    | 8e-08            | NA                    | Hypomethylated in FP vs FN |
| cg26075184 | 0.396   | 0.779   | -0.384    | 8e-08            | NA                    | Hypomethylated in FP vs FN |
| cg11024450 | 0.479   | 0.736   | -0.256    | 8e-08            | NA                    | Hypomethylated in FP vs FN |
| cg00083072 | 0.550   | 0.851   | -0.302    | 8e-08            | NA                    | Hypomethylated in FP vs FN |
| cg00538888 | 0.501   | 0.853   | -0.352    | 8e-08            | NA                    | Hypomethylated in FP vs FN |
| cg14837955 | 0.450   | 0.804   | -0.354    | 8e-08            | IL1RL2                | Hypomethylated in FP vs FN |
| cg01263574 | 0.316   | 0.613   | -0.297    | 8e-08            | TMEM8C                | Hypomethylated in FP vs FN |
| cg11071202 | 0.206   | 0.465   | -0.260    | 8e-08            | NA                    | Hypomethylated in FP vs FN |
| cg07296855 | 0.603   | 0.863   | -0.260    | 8e-08            | NA                    | Hypomethylated in FP vs FN |
| cg02764346 | 0.177   | 0.599   | -0.421    | 8e-08            | GALNT3                | Hypomethylated in FP vs FN |
| cg02874942 | 0.192   | 0.589   | -0.397    | 8e-08            | ACP5                  | Hypomethylated in FP vs FN |
| cg23924370 | 0.333   | 0.723   | -0.390    | 8e-08            | NA                    | Hypomethylated in FP vs FN |
| cg11494437 | 0.424   | 0.780   | -0.356    | 9e-08            | NA                    | Hypomethylated in FP vs FN |
| cg14674802 | 0.294   | 0.704   | -0.410    | 9e-08            | NA                    | Hypomethylated in FP vs FN |
| cg13425146 | 0.447   | 0.803   | -0.356    | 9e-08            | NA                    | Hypomethylated in FP vs FN |
| cg27036638 | 0.321   | 0.634   | -0.313    | 9e-08            | NA                    | Hypomethylated in FP vs FN |
| cg21388639 | 0.532   | 0.808   | -0.276    | 9e-08            | NA                    | Hypomethylated in FP vs FN |
| cg02234314 | 0.549   | 0.850   | -0.302    | 9e-08            | ZNF628                | Hypomethylated in FP vs FN |
| cg11710969 | 0.268   | 0.691   | -0.423    | 9e-08            | NA                    | Hypomethylated in FP vs FN |
| cg15275393 | 0.515   | 0.769   | -0.254    | 9e-08            | NA                    | Hypomethylated in FP vs FN |
| cg18462381 | 0.364   | 0.772   | -0.408    | 9e-08            | NA                    | Hypomethylated in FP vs FN |
| cg19057001 | 0.232   | 0.511   | -0.279    | 9e-08            | ANXA6                 | Hypomethylated in FP vs FN |
| cg04430582 | 0.391   | 0.759   | -0.369    | 9e-08            | MIR195_MIR497         | Hypomethylated in FP vs FN |

### Supplementary Table 7 (continued)

| Probe      | FP.mean | FN.mean | Mean.diff | Adjusted.P.value | Promoter.related.gene | Category                   |
|------------|---------|---------|-----------|------------------|-----------------------|----------------------------|
| cg04945434 | 0.527   | 0.836   | -0.309    | 9e-08            | NA                    | Hypomethylated in FP vs FN |
| cg03615568 | 0.354   | 0.740   | -0.385    | 9e-08            | NA                    | Hypomethylated in FP vs FN |
| cg02624701 | 0.327   | 0.772   | -0.445    | 9e-08            | NA                    | Hypomethylated in FP vs FN |
| cg24530000 | 0.511   | 0.789   | -0.278    | 9e-08            | NA                    | Hypomethylated in FP vs FN |
| cg00902374 | 0.284   | 0.664   | -0.381    | 9e-08            | NA                    | Hypomethylated in FP vs FN |
| cg07178969 | 0.233   | 0.681   | -0.448    | 9e-08            | NA                    | Hypomethylated in FP vs FN |
| cg12159992 | 0.315   | 0.651   | -0.336    | 9e-08            | NA                    | Hypomethylated in FP vs FN |
| cg02095596 | 0.402   | 0.716   | -0.314    | 9e-08            | NA                    | Hypomethylated in FP vs FN |
| cg21031917 | 0.282   | 0.619   | -0.338    | 9e-08            | NA                    | Hypomethylated in FP vs FN |
| cg16012773 | 0.553   | 0.806   | -0.253    | 1e-07            | NA                    | Hypomethylated in FP vs FN |
| cg23716078 | 0.500   | 0.809   | -0.308    | 1e-07            | NA                    | Hypomethylated in FP vs FN |
| cg27612166 | 0.551   | 0.837   | -0.286    | 1e-07            | NA                    | Hypomethylated in FP vs FN |
| cg27374508 | 0.519   | 0.868   | -0.349    | 1e-07            | NA                    | Hypomethylated in FP vs FN |
| cg11864326 | 0.348   | 0.692   | -0.344    | 1e-07            | NA                    | Hypomethylated in FP vs FN |
| cg26913344 | 0.491   | 0.750   | -0.258    | 1e-07            | NA                    | Hypomethylated in FP vs FN |
| cg26173417 | 0.420   | 0.754   | -0.335    | 1e-07            | NA                    | Hypomethylated in FP vs FN |
| cg10643691 | 0.325   | 0.764   | -0.439    | 1e-07            | NA                    | Hypomethylated in FP vs FN |
| cg26872045 | 0.625   | 0.883   | -0.258    | 1e-07            | NA                    | Hypomethylated in FP vs FN |
| cg10368447 | 0.149   | 0.595   | -0.445    | 1e-07            | NA                    | Hypomethylated in FP vs FN |
| cg04073970 | 0.077   | 0.583   | -0.507    | 1e-07            | NA                    | Hypomethylated in FP vs FN |
| cg07990546 | 0.332   | 0.760   | -0.427    | 1e-07            | TLX2                  | Hypomethylated in FP vs FN |
| cg24488391 | 0.506   | 0.845   | -0.339    | 1e-07            | METTL11B              | Hypomethylated in FP vs FN |
| cg18960324 | 0.261   | 0.561   | -0.300    | 1e-07            | NA                    | Hypomethylated in FP vs FN |
| cg19775582 | 0.474   | 0.858   | -0.383    | 1e-07            | NA                    | Hypomethylated in FP vs FN |
| cg05392263 | 0.388   | 0.744   | -0.356    | 1e-07            | KIF25                 | Hypomethylated in FP vs FN |

### Supplementary Table 7 (continued)

| Probe      | FP.mean | FN.mean | Mean.diff | Adjusted.P.value | Promoter.related.gene | Category                   |
|------------|---------|---------|-----------|------------------|-----------------------|----------------------------|
| cg08428985 | 0.469   | 0.744   | -0.274    | 1e-07            | NA                    | Hypomethylated in FP vs FN |
| cg24585690 | 0.570   | 0.848   | -0.278    | 1e-07            | IL9                   | Hypomethylated in FP vs FN |
| cg06464324 | 0.487   | 0.744   | -0.257    | 1e-07            | NA                    | Hypomethylated in FP vs FN |
| cg02767613 | 0.103   | 0.536   | -0.433    | 1e-07            | ACTA1                 | Hypomethylated in FP vs FN |
| cg17910105 | 0.463   | 0.791   | -0.328    | 1e-07            | NA                    | Hypomethylated in FP vs FN |
| cg19811076 | 0.431   | 0.754   | -0.323    | 1e-07            | NA                    | Hypomethylated in FP vs FN |
| cg04018325 | 0.221   | 0.617   | -0.396    | 1e-07            | MIR193B               | Hypomethylated in FP vs FN |
| cg15605096 | 0.373   | 0.758   | -0.385    | 1e-07            | NA                    | Hypomethylated in FP vs FN |
| cg20791593 | 0.421   | 0.741   | -0.320    | 1e-07            | NEU4                  | Hypomethylated in FP vs FN |
| cg26296781 | 0.170   | 0.499   | -0.329    | 1e-07            | NA                    | Hypomethylated in FP vs FN |
| cg17675386 | 0.616   | 0.869   | -0.253    | 1e-07            | NA                    | Hypomethylated in FP vs FN |
| cg07301829 | 0.347   | 0.699   | -0.352    | 1e-07            | NA                    | Hypomethylated in FP vs FN |
| cg13540960 | 0.148   | 0.660   | -0.512    | 1e-07            | NA                    | Hypomethylated in FP vs FN |
| cg20469275 | 0.327   | 0.727   | -0.401    | 1e-07            | SNCAIP                | Hypomethylated in FP vs FN |
| cg18159802 | 0.217   | 0.494   | -0.277    | 1e-07            | NA                    | Hypomethylated in FP vs FN |
| cg27295373 | 0.424   | 0.783   | -0.359    | 1e-07            | SLC30A10              | Hypomethylated in FP vs FN |
| cg09283043 | 0.393   | 0.709   | -0.316    | 1e-07            | NA                    | Hypomethylated in FP vs FN |
| cg02934719 | 0.447   | 0.795   | -0.349    | 1e-07            | NA                    | Hypomethylated in FP vs FN |
| cg13820205 | 0.265   | 0.679   | -0.414    | 1e-07            | NA                    | Hypomethylated in FP vs FN |
| cg12303215 | 0.229   | 0.559   | -0.330    | 1e-07            | NA                    | Hypomethylated in FP vs FN |
| cg09155881 | 0.359   | 0.719   | -0.361    | 1e-07            | NA                    | Hypomethylated in FP vs FN |
| cg09115960 | 0.389   | 0.736   | -0.348    | 1e-07            | NA                    | Hypomethylated in FP vs FN |
| cg18692070 | 0.169   | 0.497   | -0.328    | 1e-07            | NA                    | Hypomethylated in FP vs FN |
| cg10735582 | 0.322   | 0.676   | -0.354    | 1e-07            | NA                    | Hypomethylated in FP vs FN |
| cg13876292 | 0.503   | 0.802   | -0.299    | 1e-07            | NA                    | Hypomethylated in FP vs FN |

### Supplementary Table 7 (continued)

| Probe      | FP.mean | FN.mean | Mean.diff | Adjusted.P.value | Promoter.related.gene | Category                   |
|------------|---------|---------|-----------|------------------|-----------------------|----------------------------|
| cg06887407 | 0.498   | 0.817   | -0.319    | 1e-07            | NA                    | Hypomethylated in FP vs FN |
| cg25647784 | 0.322   | 0.656   | -0.334    | 1e-07            | NA                    | Hypomethylated in FP vs FN |
| cg23610994 | 0.480   | 0.841   | -0.361    | 1e-07            | NA                    | Hypomethylated in FP vs FN |
| cg01026233 | 0.227   | 0.576   | -0.349    | 1e-07            | NA                    | Hypomethylated in FP vs FN |
| cg03572772 | 0.263   | 0.665   | -0.401    | 1e-07            | PCDHB15               | Hypomethylated in FP vs FN |
| cg03338754 | 0.256   | 0.725   | -0.469    | 1e-07            | NA                    | Hypomethylated in FP vs FN |
| cg16289101 | 0.450   | 0.825   | -0.375    | 1e-07            | NA                    | Hypomethylated in FP vs FN |
| cg16660312 | 0.284   | 0.609   | -0.325    | 1e-07            | NEU4                  | Hypomethylated in FP vs FN |
| cg25510753 | 0.569   | 0.847   | -0.278    | 1e-07            | NA                    | Hypomethylated in FP vs FN |
| cg01052276 | 0.447   | 0.716   | -0.269    | 1e-07            | NA                    | Hypomethylated in FP vs FN |
| cg08748969 | 0.418   | 0.751   | -0.333    | 1e-07            | CPM                   | Hypomethylated in FP vs FN |
| cg25106645 | 0.327   | 0.709   | -0.382    | 1e-07            | NA                    | Hypomethylated in FP vs FN |
| cg25344367 | 0.463   | 0.769   | -0.306    | 1e-07            | NA                    | Hypomethylated in FP vs FN |
| cg20725239 | 0.322   | 0.664   | -0.342    | 1e-07            | HEPACAM               | Hypomethylated in FP vs FN |
| cg22954008 | 0.471   | 0.740   | -0.269    | 1e-07            | NA                    | Hypomethylated in FP vs FN |
| cg00400992 | 0.248   | 0.612   | -0.363    | 1e-07            | NA                    | Hypomethylated in FP vs FN |
| cg10816760 | 0.208   | 0.526   | -0.318    | 1e-07            | NA                    | Hypomethylated in FP vs FN |
| cg03571927 | 0.133   | 0.678   | -0.544    | 1e-07            | DPY19L2P4             | Hypomethylated in FP vs FN |
| cg08535112 | 0.382   | 0.788   | -0.406    | 1e-07            | NA                    | Hypomethylated in FP vs FN |
| cg16283208 | 0.133   | 0.558   | -0.425    | 1e-07            | NA                    | Hypomethylated in FP vs FN |
| cg10947633 | 0.455   | 0.826   | -0.371    | 1e-07            | NA                    | Hypomethylated in FP vs FN |
| cg01208614 | 0.502   | 0.827   | -0.325    | 1e-07            | FCHSD1                | Hypomethylated in FP vs FN |
| cg05294577 | 0.395   | 0.737   | -0.342    | 1e-07            | NA                    | Hypomethylated in FP vs FN |
| cg03820608 | 0.473   | 0.785   | -0.312    | 1e-07            | NA                    | Hypomethylated in FP vs FN |
| cg06013833 | 0.494   | 0.860   | -0.366    | 1e-07            | NA                    | Hypomethylated in FP vs FN |

### Supplementary Table 7 (continued)

| Probe      | FP.mean | FN.mean | Mean.diff | Adjusted.P.value | Promoter.related.gene | Category                   |
|------------|---------|---------|-----------|------------------|-----------------------|----------------------------|
| cg17136275 | 0.302   | 0.677   | -0.376    | 1e-07            | NA                    | Hypomethylated in FP vs FN |
| cg06533788 | 0.591   | 0.869   | -0.278    | 1e-07            | NA                    | Hypomethylated in FP vs FN |
| cg05575733 | 0.450   | 0.782   | -0.331    | 1e-07            | NA                    | Hypomethylated in FP vs FN |
| cg11861709 | 0.141   | 0.579   | -0.438    | 1e-07            | RNLS                  | Hypomethylated in FP vs FN |
| cg06410104 | 0.485   | 0.846   | -0.361    | 1e-07            | NA                    | Hypomethylated in FP vs FN |
| cg00866295 | 0.490   | 0.772   | -0.282    | 1e-07            | NA                    | Hypomethylated in FP vs FN |
| cg23167246 | 0.388   | 0.814   | -0.426    | 1e-07            | NA                    | Hypomethylated in FP vs FN |
| cg05815436 | 0.202   | 0.562   | -0.360    | 1e-07            | NA                    | Hypomethylated in FP vs FN |
| cg03679504 | 0.432   | 0.757   | -0.324    | 1e-07            | LRRC2                 | Hypomethylated in FP vs FN |
| cg03965322 | 0.413   | 0.687   | -0.274    | 1e-07            | NA                    | Hypomethylated in FP vs FN |
| cg13380612 | 0.314   | 0.765   | -0.451    | 1e-07            | NA                    | Hypomethylated in FP vs FN |
| cg07079219 | 0.157   | 0.564   | -0.407    | 1e-07            | NA                    | Hypomethylated in FP vs FN |
| cg27624327 | 0.256   | 0.616   | -0.360    | 1e-07            | NA                    | Hypomethylated in FP vs FN |
| cg08116998 | 0.471   | 0.738   | -0.267    | 1e-07            | NA                    | Hypomethylated in FP vs FN |
| cg00604736 | 0.383   | 0.750   | -0.366    | 1e-07            | AQP6                  | Hypomethylated in FP vs FN |
| cg22750001 | 0.372   | 0.721   | -0.349    | 1e-07            | MPEG1                 | Hypomethylated in FP vs FN |
| cg06052090 | 0.516   | 0.812   | -0.296    | 1e-07            | NA                    | Hypomethylated in FP vs FN |
| cg10414058 | 0.163   | 0.444   | -0.281    | 1e-07            | RELL2_HDAC3           | Hypomethylated in FP vs FN |
| cg08260658 | 0.233   | 0.625   | -0.391    | 1e-07            | NA                    | Hypomethylated in FP vs FN |
| cg24730157 | 0.498   | 0.894   | -0.396    | 1e-07            | NA                    | Hypomethylated in FP vs FN |
| cg26986443 | 0.495   | 0.840   | -0.345    | 1e-07            | NA                    | Hypomethylated in FP vs FN |
| cg19984355 | 0.410   | 0.739   | -0.329    | 1e-07            | NA                    | Hypomethylated in FP vs FN |
| cg09798801 | 0.409   | 0.781   | -0.373    | 1e-07            | NA                    | Hypomethylated in FP vs FN |
| cg06273075 | 0.211   | 0.631   | -0.420    | 1e-07            | MIR193B               | Hypomethylated in FP vs FN |
| cg07511934 | 0.240   | 0.553   | -0.313    | 1e-07            | NA                    | Hypomethylated in FP vs FN |



### Supplementary Table 7 (continued)

| Probe      | FP.mean | FN.mean | Mean.diff | Adjusted.P.value | Promoter.related.gene | Category                   |
|------------|---------|---------|-----------|------------------|-----------------------|----------------------------|
| cg24815353 | 0.439   | 0.806   | -0.367    | 1e-07            | NA                    | Hypomethylated in FP vs FN |
| cg04124361 | 0.582   | 0.833   | -0.251    | 1e-07            | NA                    | Hypomethylated in FP vs FN |
| cg08426823 | 0.499   | 0.813   | -0.315    | 1e-07            | NA                    | Hypomethylated in FP vs FN |
| cg04132891 | 0.230   | 0.570   | -0.340    | 1e-07            | NA                    | Hypomethylated in FP vs FN |
| cg09237447 | 0.469   | 0.797   | -0.329    | 1e-07            | NA                    | Hypomethylated in FP vs FN |
| cg05448271 | 0.511   | 0.816   | -0.305    | 1e-07            | NA                    | Hypomethylated in FP vs FN |
| cg17699047 | 0.401   | 0.745   | -0.344    | 1e-07            | NA                    | Hypomethylated in FP vs FN |
| cg08549335 | 0.441   | 0.726   | -0.285    | 1e-07            | NA                    | Hypomethylated in FP vs FN |
| cg02946394 | 0.431   | 0.699   | -0.269    | 1e-07            | NA                    | Hypomethylated in FP vs FN |
| cg02952703 | 0.561   | 0.822   | -0.261    | 1e-07            | NA                    | Hypomethylated in FP vs FN |
| cg26065247 | 0.403   | 0.704   | -0.301    | 1e-07            | NA                    | Hypomethylated in FP vs FN |
| cg13752885 | 0.449   | 0.752   | -0.303    | 1e-07            | MCART1                | Hypomethylated in FP vs FN |
| cg03920522 | 0.356   | 0.775   | -0.419    | 1e-07            | NA                    | Hypomethylated in FP vs FN |
| cg08599448 | 0.152   | 0.553   | -0.401    | 1e-07            | ACP5                  | Hypomethylated in FP vs FN |
| cg25424742 | 0.373   | 0.747   | -0.374    | 1e-07            | NA                    | Hypomethylated in FP vs FN |
| cg03858448 | 0.484   | 0.780   | -0.296    | 1e-07            | NA                    | Hypomethylated in FP vs FN |
| cg02149376 | 0.369   | 0.691   | -0.322    | 1e-07            | NA                    | Hypomethylated in FP vs FN |
| cg23250540 | 0.385   | 0.773   | -0.388    | 1e-07            | TMPRSS3               | Hypomethylated in FP vs FN |
| cg24873202 | 0.387   | 0.702   | -0.315    | 1e-07            | NA                    | Hypomethylated in FP vs FN |
| cg07669182 | 0.456   | 0.765   | -0.309    | 1e-07            | NA                    | Hypomethylated in FP vs FN |
| cg01295785 | 0.378   | 0.751   | -0.373    | 2e-07            | NA                    | Hypomethylated in FP vs FN |
| cg26958597 | 0.127   | 0.543   | -0.415    | 2e-07            | EFCAB10               | Hypomethylated in FP vs FN |
| cg09417809 | 0.386   | 0.712   | -0.326    | 2e-07            | NA                    | Hypomethylated in FP vs FN |
| cg01029395 | 0.506   | 0.835   | -0.329    | 2e-07            | NA                    | Hypomethylated in FP vs FN |
| cg08162222 | 0.263   | 0.675   | -0.412    | 2e-07            | NA                    | Hypomethylated in FP vs FN |

### Supplementary Table 7 (continued)

| Probe      | FP.mean | FN.mean | Mean.diff | Adjusted.P.value | Promoter.related.gene | Category                   |
|------------|---------|---------|-----------|------------------|-----------------------|----------------------------|
| cg17773660 | 0.464   | 0.768   | -0.304    | 2e-07            | NA                    | Hypomethylated in FP vs FN |
| cg25452067 | 0.225   | 0.593   | -0.369    | 2e-07            | NA                    | Hypomethylated in FP vs FN |
| cg20749769 | 0.082   | 0.568   | -0.486    | 2e-07            | NA                    | Hypomethylated in FP vs FN |
| cg05134019 | 0.292   | 0.681   | -0.388    | 2e-07            | NA                    | Hypomethylated in FP vs FN |
| cg18147233 | 0.357   | 0.706   | -0.349    | 2e-07            | NA                    | Hypomethylated in FP vs FN |
| cg19639967 | 0.464   | 0.831   | -0.367    | 2e-07            | NA                    | Hypomethylated in FP vs FN |
| cg00980060 | 0.265   | 0.614   | -0.349    | 2e-07            | NA                    | Hypomethylated in FP vs FN |
| cg12413242 | 0.304   | 0.591   | -0.287    | 2e-07            | NA                    | Hypomethylated in FP vs FN |
| cg25593948 | 0.261   | 0.722   | -0.461    | 2e-07            | TFAP2B                | Hypomethylated in FP vs FN |
| cg11700356 | 0.216   | 0.637   | -0.422    | 2e-07            | NA                    | Hypomethylated in FP vs FN |
| cg24213719 | 0.152   | 0.654   | -0.502    | 2e-07            | NA                    | Hypomethylated in FP vs FN |
| cg26000011 | 0.586   | 0.868   | -0.282    | 2e-07            | NA                    | Hypomethylated in FP vs FN |
| cg18738220 | 0.387   | 0.743   | -0.356    | 2e-07            | NA                    | Hypomethylated in FP vs FN |
| cg26786253 | 0.562   | 0.872   | -0.311    | 2e-07            | NA                    | Hypomethylated in FP vs FN |
| cg19678029 | 0.516   | 0.810   | -0.293    | 2e-07            | KCNQ1OT1              | Hypomethylated in FP vs FN |
| cg18170348 | 0.461   | 0.769   | -0.307    | 2e-07            | NA                    | Hypomethylated in FP vs FN |
| cg03061682 | 0.072   | 0.657   | -0.585    | 2e-07            | NA                    | Hypomethylated in FP vs FN |
| cg14480531 | 0.264   | 0.635   | -0.371    | 2e-07            | NA                    | Hypomethylated in FP vs FN |
| cg11247497 | 0.473   | 0.799   | -0.326    | 2e-07            | NA                    | Hypomethylated in FP vs FN |
| cg16954165 | 0.347   | 0.701   | -0.354    | 2e-07            | NA                    | Hypomethylated in FP vs FN |
| cg00674896 | 0.195   | 0.658   | -0.463    | 2e-07            | NA                    | Hypomethylated in FP vs FN |
| cg23811057 | 0.244   | 0.564   | -0.320    | 2e-07            | NA                    | Hypomethylated in FP vs FN |
| cg11528328 | 0.118   | 0.626   | -0.508    | 2e-07            | CLIC6                 | Hypomethylated in FP vs FN |
| cg19560210 | 0.410   | 0.771   | -0.361    | 2e-07            | PGBD5                 | Hypomethylated in FP vs FN |
| cg22256433 | 0.191   | 0.560   | -0.369    | 2e-07            | NA                    | Hypomethylated in FP vs FN |

### Supplementary Table 7 (continued)

| Probe      | FP.mean | FN.mean | Mean.diff | Adjusted.P.value | Promoter.related.gene | Category                   |
|------------|---------|---------|-----------|------------------|-----------------------|----------------------------|
| cg27135286 | 0.255   | 0.533   | -0.278    | 2e-07            | NA                    | Hypomethylated in FP vs FN |
| cg14517359 | 0.525   | 0.794   | -0.269    | 2e-07            | NA                    | Hypomethylated in FP vs FN |
| cg23756005 | 0.340   | 0.695   | -0.356    | 2e-07            | NA                    | Hypomethylated in FP vs FN |
| cg07166333 | 0.451   | 0.840   | -0.389    | 2e-07            | NA                    | Hypomethylated in FP vs FN |
| cg16805189 | 0.464   | 0.744   | -0.280    | 2e-07            | NA                    | Hypomethylated in FP vs FN |
| cg26687830 | 0.378   | 0.694   | -0.316    | 2e-07            | NA                    | Hypomethylated in FP vs FN |
| cg03032798 | 0.345   | 0.754   | -0.409    | 2e-07            | NA                    | Hypomethylated in FP vs FN |
| cg13494826 | 0.366   | 0.668   | -0.302    | 2e-07            | NA                    | Hypomethylated in FP vs FN |
| cg20411935 | 0.241   | 0.606   | -0.365    | 2e-07            | NA                    | Hypomethylated in FP vs FN |
| cg19765281 | 0.482   | 0.783   | -0.301    | 2e-07            | NA                    | Hypomethylated in FP vs FN |
| cg03792964 | 0.436   | 0.724   | -0.288    | 2e-07            | NA                    | Hypomethylated in FP vs FN |
| cg05168012 | 0.494   | 0.887   | -0.393    | 2e-07            | NA                    | Hypomethylated in FP vs FN |
| cg06086012 | 0.393   | 0.703   | -0.310    | 2e-07            | NA                    | Hypomethylated in FP vs FN |
| cg20744108 | 0.420   | 0.776   | -0.356    | 2e-07            | NA                    | Hypomethylated in FP vs FN |
| cg01789743 | 0.389   | 0.678   | -0.289    | 2e-07            | NA                    | Hypomethylated in FP vs FN |
| cg26504110 | 0.278   | 0.755   | -0.478    | 2e-07            | NA                    | Hypomethylated in FP vs FN |
| cg10830649 | 0.115   | 0.605   | -0.490    | 2e-07            | GALNT3                | Hypomethylated in FP vs FN |
| cg20424973 | 0.384   | 0.704   | -0.320    | 2e-07            | NA                    | Hypomethylated in FP vs FN |
| cg26189067 | 0.198   | 0.568   | -0.370    | 2e-07            | TTC27                 | Hypomethylated in FP vs FN |
| cg22025206 | 0.261   | 0.637   | -0.377    | 2e-07            | NA                    | Hypomethylated in FP vs FN |
| cg24603464 | 0.113   | 0.555   | -0.442    | 2e-07            | MLPH                  | Hypomethylated in FP vs FN |
| cg09111484 | 0.563   | 0.878   | -0.314    | 2e-07            | NA                    | Hypomethylated in FP vs FN |
| cg09177659 | 0.575   | 0.856   | -0.281    | 2e-07            | NA                    | Hypomethylated in FP vs FN |
| cg07203423 | 0.312   | 0.682   | -0.370    | 2e-07            | NA                    | Hypomethylated in FP vs FN |
| cg04733856 | 0.442   | 0.754   | -0.313    | 2e-07            | NA                    | Hypomethylated in FP vs FN |

### Supplementary Table 7 (continued)

| Probe      | FP.mean | FN.mean | Mean.diff | Adjusted.P.value | Promoter.related.gene | Category                   |
|------------|---------|---------|-----------|------------------|-----------------------|----------------------------|
| cg26470937 | 0.521   | 0.838   | -0.317    | 2e-07            | NA                    | Hypomethylated in FP vs FN |
| cg10900526 | 0.457   | 0.806   | -0.349    | 2e-07            | NA                    | Hypomethylated in FP vs FN |
| cg14741474 | 0.343   | 0.673   | -0.330    | 2e-07            | SELPLG                | Hypomethylated in FP vs FN |
| cg25424029 | 0.522   | 0.805   | -0.283    | 2e-07            | NA                    | Hypomethylated in FP vs FN |
| cg18646254 | 0.521   | 0.796   | -0.275    | 2e-07            | NA                    | Hypomethylated in FP vs FN |
| cg08108655 | 0.456   | 0.790   | -0.334    | 2e-07            | NA                    | Hypomethylated in FP vs FN |
| cg18646365 | 0.321   | 0.695   | -0.374    | 2e-07            | CRABP1                | Hypomethylated in FP vs FN |
| cg21994818 | 0.313   | 0.654   | -0.341    | 2e-07            | NA                    | Hypomethylated in FP vs FN |
| cg07969619 | 0.111   | 0.533   | -0.423    | 2e-07            | NA                    | Hypomethylated in FP vs FN |
| cg02523640 | 0.130   | 0.663   | -0.532    | 2e-07            | FOXI2                 | Hypomethylated in FP vs FN |
| cg19320612 | 0.538   | 0.852   | -0.314    | 2e-07            | NA                    | Hypomethylated in FP vs FN |
| cg06444374 | 0.445   | 0.712   | -0.267    | 2e-07            | NA                    | Hypomethylated in FP vs FN |
| cg20972453 | 0.211   | 0.591   | -0.381    | 2e-07            | GJB6                  | Hypomethylated in FP vs FN |
| cg01776926 | 0.513   | 0.809   | -0.296    | 2e-07            | NA                    | Hypomethylated in FP vs FN |
| cg02322400 | 0.340   | 0.634   | -0.293    | 2e-07            | NA                    | Hypomethylated in FP vs FN |
| cg11908202 | 0.602   | 0.903   | -0.302    | 2e-07            | NA                    | Hypomethylated in FP vs FN |
| cg02367850 | 0.273   | 0.792   | -0.519    | 2e-07            | NA                    | Hypomethylated in FP vs FN |
| cg13842262 | 0.526   | 0.839   | -0.313    | 2e-07            | NA                    | Hypomethylated in FP vs FN |
| cg13857933 | 0.185   | 0.436   | -0.251    | 2e-07            | NA                    | Hypomethylated in FP vs FN |
| cg03504042 | 0.459   | 0.782   | -0.323    | 2e-07            | NA                    | Hypomethylated in FP vs FN |
| cg08843850 | 0.510   | 0.838   | -0.328    | 2e-07            | NA                    | Hypomethylated in FP vs FN |
| cg24723373 | 0.450   | 0.762   | -0.312    | 2e-07            | NA                    | Hypomethylated in FP vs FN |
| cg05960932 | 0.508   | 0.798   | -0.289    | 2e-07            | NA                    | Hypomethylated in FP vs FN |
| cg13487156 | 0.535   | 0.800   | -0.264    | 2e-07            | NA                    | Hypomethylated in FP vs FN |
| cg23962048 | 0.437   | 0.755   | -0.318    | 2e-07            | NA                    | Hypomethylated in FP vs FN |

### Supplementary Table 7 (continued)

| Probe      | FP.mean | FN.mean | Mean.diff | Adjusted.P.value | Promoter.related.gene | Category                   |
|------------|---------|---------|-----------|------------------|-----------------------|----------------------------|
| cg05667101 | 0.484   | 0.860   | -0.376    | 2e-07            | NTN5                  | Hypomethylated in FP vs FN |
| cg07223180 | 0.524   | 0.834   | -0.310    | 2e-07            | NA                    | Hypomethylated in FP vs FN |
| cg11620475 | 0.273   | 0.641   | -0.368    | 2e-07            | LOC389332             | Hypomethylated in FP vs FN |
| cg00396865 | 0.450   | 0.720   | -0.270    | 2e-07            | NA                    | Hypomethylated in FP vs FN |
| cg16823466 | 0.241   | 0.710   | -0.469    | 2e-07            | NA                    | Hypomethylated in FP vs FN |
| cg16764236 | 0.357   | 0.739   | -0.382    | 2e-07            | CCL11                 | Hypomethylated in FP vs FN |
| cg00885461 | 0.485   | 0.816   | -0.331    | 2e-07            | NA                    | Hypomethylated in FP vs FN |
| cg00405688 | 0.341   | 0.771   | -0.430    | 2e-07            | FOXI2                 | Hypomethylated in FP vs FN |
| cg00381829 | 0.432   | 0.737   | -0.306    | 2e-07            | NA                    | Hypomethylated in FP vs FN |
| cg08013274 | 0.550   | 0.818   | -0.268    | 2e-07            | NA                    | Hypomethylated in FP vs FN |
| cg14143441 | 0.506   | 0.795   | -0.289    | 2e-07            | NA                    | Hypomethylated in FP vs FN |
| cg03340365 | 0.252   | 0.628   | -0.375    | 2e-07            | NA                    | Hypomethylated in FP vs FN |
| cg01557221 | 0.408   | 0.704   | -0.296    | 2e-07            | APOL3                 | Hypomethylated in FP vs FN |
| cg16857825 | 0.397   | 0.736   | -0.339    | 2e-07            | MAPK14                | Hypomethylated in FP vs FN |
| cg13138446 | 0.330   | 0.712   | -0.383    | 2e-07            | NA                    | Hypomethylated in FP vs FN |
| cg22243439 | 0.492   | 0.842   | -0.349    | 2e-07            | NA                    | Hypomethylated in FP vs FN |
| cg16868298 | 0.322   | 0.715   | -0.393    | 2e-07            | WNT16                 | Hypomethylated in FP vs FN |
| cg01219426 | 0.191   | 0.475   | -0.284    | 2e-07            | NA                    | Hypomethylated in FP vs FN |
| cg27637738 | 0.506   | 0.786   | -0.280    | 2e-07            | NA                    | Hypomethylated in FP vs FN |
| cg01485010 | 0.210   | 0.606   | -0.396    | 2e-07            | EPHA1                 | Hypomethylated in FP vs FN |
| cg04148355 | 0.461   | 0.753   | -0.292    | 2e-07            | NA                    | Hypomethylated in FP vs FN |
| cg24773418 | 0.091   | 0.569   | -0.477    | 2e-07            | NA                    | Hypomethylated in FP vs FN |
| cg27175024 | 0.153   | 0.554   | -0.401    | 2e-07            | NA                    | Hypomethylated in FP vs FN |
| cg25878149 | 0.554   | 0.841   | -0.287    | 2e-07            | NA                    | Hypomethylated in FP vs FN |
| cg19548859 | 0.279   | 0.648   | -0.369    | 2e-07            | NA                    | Hypomethylated in FP vs FN |

### Supplementary Table 7 (continued)

| Probe      | FP.mean | FN.mean | Mean.diff | Adjusted.P.value | Promoter.related.gene | Category                   |
|------------|---------|---------|-----------|------------------|-----------------------|----------------------------|
| cg16408555 | 0.475   | 0.754   | -0.279    | 2e-07            | NA                    | Hypomethylated in FP vs FN |
| cg14354820 | 0.431   | 0.710   | -0.279    | 2e-07            | NA                    | Hypomethylated in FP vs FN |
| cg13616930 | 0.460   | 0.765   | -0.305    | 2e-07            | ZNF750                | Hypomethylated in FP vs FN |
| cg06406458 | 0.602   | 0.937   | -0.335    | 2e-07            | NA                    | Hypomethylated in FP vs FN |
| cg16539741 | 0.255   | 0.539   | -0.284    | 2e-07            | NA                    | Hypomethylated in FP vs FN |
| cg03472888 | 0.470   | 0.833   | -0.363    | 2e-07            | NA                    | Hypomethylated in FP vs FN |
| cg11526848 | 0.307   | 0.716   | -0.409    | 2e-07            | NA                    | Hypomethylated in FP vs FN |
| cg24519867 | 0.541   | 0.826   | -0.285    | 2e-07            | NA                    | Hypomethylated in FP vs FN |
| cg05643339 | 0.362   | 0.738   | -0.376    | 2e-07            | TNN                   | Hypomethylated in FP vs FN |
| cg03595580 | 0.177   | 0.521   | -0.345    | 2e-07            | NA                    | Hypomethylated in FP vs FN |
| cg25043050 | 0.454   | 0.793   | -0.339    | 2e-07            | FOXI2                 | Hypomethylated in FP vs FN |
| cg19306958 | 0.572   | 0.881   | -0.309    | 2e-07            | NA                    | Hypomethylated in FP vs FN |
| cg16079364 | 0.197   | 0.462   | -0.265    | 2e-07            | NA                    | Hypomethylated in FP vs FN |
| cg02768671 | 0.372   | 0.672   | -0.300    | 2e-07            | NA                    | Hypomethylated in FP vs FN |
| cg07344338 | 0.289   | 0.653   | -0.363    | 2e-07            | NA                    | Hypomethylated in FP vs FN |
| cg03698681 | 0.501   | 0.817   | -0.316    | 2e-07            | NA                    | Hypomethylated in FP vs FN |
| cg23367107 | 0.078   | 0.542   | -0.464    | 2e-07            | NA                    | Hypomethylated in FP vs FN |
| cg27513684 | 0.275   | 0.537   | -0.262    | 2e-07            | NA                    | Hypomethylated in FP vs FN |
| cg24166814 | 0.592   | 0.860   | -0.269    | 2e-07            | NA                    | Hypomethylated in FP vs FN |
| cg15579971 | 0.300   | 0.636   | -0.336    | 2e-07            | NA                    | Hypomethylated in FP vs FN |
| cg17665357 | 0.657   | 0.914   | -0.257    | 2e-07            | NA                    | Hypomethylated in FP vs FN |
| cg19350115 | 0.380   | 0.706   | -0.325    | 2e-07            | NA                    | Hypomethylated in FP vs FN |
| cg09506473 | 0.153   | 0.568   | -0.415    | 2e-07            | PSKH2                 | Hypomethylated in FP vs FN |
| cg17091312 | 0.286   | 0.609   | -0.323    | 2e-07            | NA                    | Hypomethylated in FP vs FN |
| cg00273449 | 0.353   | 0.694   | -0.341    | 2e-07            | C2orf65               | Hypomethylated in FP vs FN |

### Supplementary Table 7 (continued)

| Probe      | FP.mean | FN.mean | Mean.diff | Adjusted.P.value | Promoter.related.gene | Category                   |
|------------|---------|---------|-----------|------------------|-----------------------|----------------------------|
| cg02611848 | 0.370   | 0.784   | -0.414    | 2e-07            | C2orf65               | Hypomethylated in FP vs FN |
| cg25820062 | 0.368   | 0.700   | -0.332    | 2e-07            | NA                    | Hypomethylated in FP vs FN |
| cg14658300 | 0.396   | 0.680   | -0.283    | 2e-07            | NA                    | Hypomethylated in FP vs FN |
| cg00038857 | 0.505   | 0.763   | -0.259    | 2e-07            | CCL8                  | Hypomethylated in FP vs FN |
| cg09047361 | 0.531   | 0.790   | -0.259    | 2e-07            | NA                    | Hypomethylated in FP vs FN |
| cg22923006 | 0.324   | 0.717   | -0.393    | 2e-07            | NA                    | Hypomethylated in FP vs FN |
| cg19326382 | 0.414   | 0.811   | -0.397    | 2e-07            | NA                    | Hypomethylated in FP vs FN |
| cg03989507 | 0.347   | 0.762   | -0.414    | 2e-07            | NA                    | Hypomethylated in FP vs FN |
| cg13531667 | 0.193   | 0.491   | -0.298    | 2e-07            | MCC                   | Hypomethylated in FP vs FN |
| cg10738025 | 0.412   | 0.767   | -0.355    | 2e-07            | NA                    | Hypomethylated in FP vs FN |
| cg02792168 | 0.316   | 0.789   | -0.472    | 2e-07            | NA                    | Hypomethylated in FP vs FN |
| cg15090036 | 0.405   | 0.659   | -0.254    | 2e-07            | NA                    | Hypomethylated in FP vs FN |
| cg10272520 | 0.568   | 0.893   | -0.326    | 2e-07            | NA                    | Hypomethylated in FP vs FN |
| cg14253677 | 0.490   | 0.768   | -0.279    | 2e-07            | KCNV2                 | Hypomethylated in FP vs FN |
| cg05790630 | 0.591   | 0.859   | -0.267    | 2e-07            | NA                    | Hypomethylated in FP vs FN |
| cg13493546 | 0.578   | 0.892   | -0.314    | 2e-07            | NA                    | Hypomethylated in FP vs FN |
| cg24516497 | 0.536   | 0.798   | -0.262    | 2e-07            | NA                    | Hypomethylated in FP vs FN |
| cg27116114 | 0.476   | 0.732   | -0.256    | 2e-07            | NA                    | Hypomethylated in FP vs FN |
| cg25475742 | 0.355   | 0.741   | -0.385    | 2e-07            | NA                    | Hypomethylated in FP vs FN |
| cg16572957 | 0.466   | 0.845   | -0.379    | 2e-07            | NA                    | Hypomethylated in FP vs FN |
| cg00815484 | 0.264   | 0.718   | -0.454    | 2e-07            | NA                    | Hypomethylated in FP vs FN |
| cg06799533 | 0.411   | 0.758   | -0.347    | 2e-07            | NA                    | Hypomethylated in FP vs FN |
| cg14086692 | 0.425   | 0.712   | -0.287    | 2e-07            | NA                    | Hypomethylated in FP vs FN |
| cg04422003 | 0.460   | 0.740   | -0.280    | 2e-07            | NA                    | Hypomethylated in FP vs FN |
| cg25227672 | 0.365   | 0.689   | -0.324    | 2e-07            | HEPACAM               | Hypomethylated in FP vs FN |

**Supplementary Table 7 (continued)**

| Probe      | FP.mean | FN.mean | Mean.diff | Adjusted.P.value | Promoter.related.gene | Category                   |
|------------|---------|---------|-----------|------------------|-----------------------|----------------------------|
| cg01980735 | 0.522   | 0.781   | -0.259    | 2e-07            | NA                    | Hypomethylated in FP vs FN |
| cg22813290 | 0.517   | 0.833   | -0.316    | 2e-07            | NA                    | Hypomethylated in FP vs FN |
| cg11192787 | 0.358   | 0.685   | -0.327    | 2e-07            | NA                    | Hypomethylated in FP vs FN |
| cg02884053 | 0.512   | 0.806   | -0.295    | 2e-07            | NA                    | Hypomethylated in FP vs FN |
| cg08116113 | 0.423   | 0.706   | -0.284    | 2e-07            | NA                    | Hypomethylated in FP vs FN |
| cg11014463 | 0.214   | 0.614   | -0.400    | 2e-07            | BEND6                 | Hypomethylated in FP vs FN |
| cg10440196 | 0.567   | 0.889   | -0.322    | 2e-07            | NA                    | Hypomethylated in FP vs FN |
| cg12617473 | 0.539   | 0.840   | -0.301    | 2e-07            | NA                    | Hypomethylated in FP vs FN |
| cg08625996 | 0.455   | 0.782   | -0.327    | 2e-07            | NA                    | Hypomethylated in FP vs FN |
| cg08282578 | 0.500   | 0.759   | -0.259    | 2e-07            | NA                    | Hypomethylated in FP vs FN |
| cg21980100 | 0.313   | 0.623   | -0.310    | 2e-07            | CCDC144NL             | Hypomethylated in FP vs FN |
| cg05031424 | 0.408   | 0.737   | -0.329    | 2e-07            | NA                    | Hypomethylated in FP vs FN |
| cg17586256 | 0.214   | 0.563   | -0.348    | 2e-07            | NA                    | Hypomethylated in FP vs FN |
| cg23169883 | 0.398   | 0.767   | -0.369    | 3e-07            | NA                    | Hypomethylated in FP vs FN |
| cg02384546 | 0.357   | 0.714   | -0.358    | 3e-07            | ZNF750                | Hypomethylated in FP vs FN |
| cg10081941 | 0.497   | 0.841   | -0.344    | 3e-07            | NA                    | Hypomethylated in FP vs FN |
| cg19980718 | 0.599   | 0.873   | -0.274    | 3e-07            | NA                    | Hypomethylated in FP vs FN |
| cg06625004 | 0.307   | 0.666   | -0.359    | 3e-07            | NA                    | Hypomethylated in FP vs FN |
| cg13554136 | 0.320   | 0.700   | -0.381    | 3e-07            | NA                    | Hypomethylated in FP vs FN |
| cg26380443 | 0.316   | 0.682   | -0.366    | 3e-07            | PCDHB15               | Hypomethylated in FP vs FN |
| cg18788932 | 0.405   | 0.733   | -0.328    | 3e-07            | NA                    | Hypomethylated in FP vs FN |
| cg07066794 | 0.329   | 0.597   | -0.268    | 3e-07            | NA                    | Hypomethylated in FP vs FN |
| cg09135551 | 0.181   | 0.560   | -0.380    | 3e-07            | TMEM26                | Hypomethylated in FP vs FN |
| cg23696712 | 0.327   | 0.656   | -0.329    | 3e-07            | KRT79                 | Hypomethylated in FP vs FN |
| cg06981182 | 0.150   | 0.602   | -0.452    | 3e-07            | RNLS                  | Hypomethylated in FP vs FN |



### Supplementary Table 7 (continued)

| Probe      | FP.mean | FN.mean | Mean.diff | Adjusted.P.value | Promoter.related.gene | Category                   |
|------------|---------|---------|-----------|------------------|-----------------------|----------------------------|
| cg16922884 | 0.368   | 0.699   | -0.331    | 3e-07            | NA                    | Hypomethylated in FP vs FN |
| cg06087826 | 0.333   | 0.690   | -0.357    | 3e-07            | NA                    | Hypomethylated in FP vs FN |
| cg09304357 | 0.165   | 0.532   | -0.368    | 3e-07            | NA                    | Hypomethylated in FP vs FN |
| cg06038470 | 0.520   | 0.852   | -0.331    | 3e-07            | NA                    | Hypomethylated in FP vs FN |
| cg23744121 | 0.507   | 0.783   | -0.276    | 3e-07            | NA                    | Hypomethylated in FP vs FN |
| cg19640103 | 0.510   | 0.832   | -0.321    | 3e-07            | NA                    | Hypomethylated in FP vs FN |
| cg03185794 | 0.221   | 0.571   | -0.350    | 3e-07            | NA                    | Hypomethylated in FP vs FN |
| cg10089145 | 0.102   | 0.560   | -0.458    | 3e-07            | NA                    | Hypomethylated in FP vs FN |
| cg09338297 | 0.353   | 0.745   | -0.392    | 3e-07            | NA                    | Hypomethylated in FP vs FN |
| cg13197308 | 0.636   | 0.915   | -0.279    | 3e-07            | NA                    | Hypomethylated in FP vs FN |
| cg03441279 | 0.459   | 0.793   | -0.334    | 3e-07            | NA                    | Hypomethylated in FP vs FN |
| cg13953458 | 0.407   | 0.741   | -0.334    | 3e-07            | NA                    | Hypomethylated in FP vs FN |
| cg10612492 | 0.317   | 0.729   | -0.412    | 3e-07            | NA                    | Hypomethylated in FP vs FN |
| cg13220569 | 0.385   | 0.758   | -0.373    | 3e-07            | KCNA5                 | Hypomethylated in FP vs FN |
| cg21396064 | 0.218   | 0.578   | -0.361    | 3e-07            | MIR193B               | Hypomethylated in FP vs FN |
| cg26886277 | 0.447   | 0.764   | -0.317    | 3e-07            | REEP1                 | Hypomethylated in FP vs FN |
| cg12551582 | 0.066   | 0.482   | -0.416    | 3e-07            | CHFR                  | Hypomethylated in FP vs FN |
| cg17023770 | 0.397   | 0.716   | -0.319    | 3e-07            | PCDHB15               | Hypomethylated in FP vs FN |
| cg11363097 | 0.562   | 0.831   | -0.269    | 3e-07            | IDO2                  | Hypomethylated in FP vs FN |
| cg10828599 | 0.427   | 0.759   | -0.332    | 3e-07            | ZNF750                | Hypomethylated in FP vs FN |
| cg18483487 | 0.201   | 0.496   | -0.295    | 3e-07            | NA                    | Hypomethylated in FP vs FN |
| cg15531512 | 0.284   | 0.618   | -0.334    | 3e-07            | NA                    | Hypomethylated in FP vs FN |
| cg27523087 | 0.354   | 0.703   | -0.350    | 3e-07            | NA                    | Hypomethylated in FP vs FN |
| cg04887082 | 0.237   | 0.510   | -0.273    | 3e-07            | NA                    | Hypomethylated in FP vs FN |
| cg08831531 | 0.446   | 0.784   | -0.337    | 3e-07            | NA                    | Hypomethylated in FP vs FN |

### Supplementary Table 7 (continued)

| Probe      | FP.mean | FN.mean | Mean.diff | Adjusted.P.value | Promoter.related.gene | Category                   |
|------------|---------|---------|-----------|------------------|-----------------------|----------------------------|
| cg19795150 | 0.288   | 0.628   | -0.340    | 3e-07            | OTOS                  | Hypomethylated in FP vs FN |
| cg17095936 | 0.475   | 0.824   | -0.349    | 3e-07            | NA                    | Hypomethylated in FP vs FN |
| cg06118999 | 0.156   | 0.603   | -0.447    | 3e-07            | RNLS                  | Hypomethylated in FP vs FN |
| cg08954352 | 0.335   | 0.668   | -0.334    | 3e-07            | NA                    | Hypomethylated in FP vs FN |
| cg12062597 | 0.437   | 0.791   | -0.353    | 3e-07            | NA                    | Hypomethylated in FP vs FN |
| cg02762546 | 0.373   | 0.720   | -0.347    | 3e-07            | HDAC11                | Hypomethylated in FP vs FN |
| cg26159750 | 0.447   | 0.776   | -0.329    | 3e-07            | NA                    | Hypomethylated in FP vs FN |
| cg03793055 | 0.520   | 0.821   | -0.301    | 3e-07            | BCAR1                 | Hypomethylated in FP vs FN |
| cg25654705 | 0.485   | 0.797   | -0.313    | 3e-07            | NA                    | Hypomethylated in FP vs FN |
| cg10514113 | 0.399   | 0.734   | -0.335    | 3e-07            | NA                    | Hypomethylated in FP vs FN |
| cg00305947 | 0.383   | 0.748   | -0.366    | 3e-07            | NA                    | Hypomethylated in FP vs FN |
| cg25492645 | 0.231   | 0.623   | -0.393    | 3e-07            | GALNT3                | Hypomethylated in FP vs FN |
| cg14308648 | 0.628   | 0.882   | -0.254    | 3e-07            | NA                    | Hypomethylated in FP vs FN |
| cg01741626 | 0.277   | 0.675   | -0.399    | 3e-07            | NA                    | Hypomethylated in FP vs FN |
| cg18289710 | 0.396   | 0.734   | -0.338    | 3e-07            | NA                    | Hypomethylated in FP vs FN |
| cg13686795 | 0.349   | 0.668   | -0.318    | 3e-07            | NA                    | Hypomethylated in FP vs FN |
| cg14018140 | 0.403   | 0.723   | -0.319    | 3e-07            | NA                    | Hypomethylated in FP vs FN |
| cg27574595 | 0.398   | 0.759   | -0.361    | 3e-07            | NA                    | Hypomethylated in FP vs FN |
| cg00995798 | 0.184   | 0.557   | -0.373    | 3e-07            | TTC27                 | Hypomethylated in FP vs FN |
| cg16516691 | 0.138   | 0.570   | -0.431    | 3e-07            | ZSWIM2                | Hypomethylated in FP vs FN |
| cg19371121 | 0.391   | 0.701   | -0.311    | 3e-07            | NA                    | Hypomethylated in FP vs FN |
| cg06254938 | 0.427   | 0.730   | -0.303    | 3e-07            | NA                    | Hypomethylated in FP vs FN |
| cg03034634 | 0.171   | 0.545   | -0.375    | 3e-07            | MTMR9                 | Hypomethylated in FP vs FN |
| cg21067632 | 0.468   | 0.829   | -0.360    | 3e-07            | NA                    | Hypomethylated in FP vs FN |
| cg16057826 | 0.293   | 0.687   | -0.394    | 3e-07            | CLIC6                 | Hypomethylated in FP vs FN |

### Supplementary Table 7 (continued)

| Probe      | FP.mean | FN.mean | Mean.diff | Adjusted.P.value | Promoter.related.gene | Category                   |
|------------|---------|---------|-----------|------------------|-----------------------|----------------------------|
| cg07015663 | 0.276   | 0.533   | -0.257    | 3e-07            | NA                    | Hypomethylated in FP vs FN |
| cg19997502 | 0.236   | 0.635   | -0.399    | 3e-07            | NA                    | Hypomethylated in FP vs FN |
| cg07951978 | 0.078   | 0.527   | -0.448    | 3e-07            | CHFR                  | Hypomethylated in FP vs FN |
| cg21885251 | 0.367   | 0.737   | -0.370    | 3e-07            | NA                    | Hypomethylated in FP vs FN |
| cg12219155 | 0.490   | 0.812   | -0.321    | 3e-07            | NA                    | Hypomethylated in FP vs FN |
| cg23964820 | 0.269   | 0.606   | -0.337    | 3e-07            | NA                    | Hypomethylated in FP vs FN |
| cg11965881 | 0.515   | 0.821   | -0.306    | 3e-07            | NA                    | Hypomethylated in FP vs FN |
| cg25496678 | 0.249   | 0.682   | -0.433    | 3e-07            | NA                    | Hypomethylated in FP vs FN |
| cg27318087 | 0.470   | 0.748   | -0.279    | 3e-07            | NA                    | Hypomethylated in FP vs FN |
| cg05306173 | 0.548   | 0.809   | -0.262    | 3e-07            | NA                    | Hypomethylated in FP vs FN |
| cg16640008 | 0.464   | 0.771   | -0.307    | 3e-07            | NA                    | Hypomethylated in FP vs FN |
| cg16751451 | 0.395   | 0.759   | -0.364    | 3e-07            | EGFR                  | Hypomethylated in FP vs FN |
| cg08530065 | 0.556   | 0.811   | -0.254    | 3e-07            | NA                    | Hypomethylated in FP vs FN |
| cg11362049 | 0.428   | 0.771   | -0.343    | 3e-07            | NA                    | Hypomethylated in FP vs FN |
| cg24990327 | 0.532   | 0.821   | -0.289    | 3e-07            | MIR548F3              | Hypomethylated in FP vs FN |
| cg00397179 | 0.352   | 0.681   | -0.329    | 3e-07            | NA                    | Hypomethylated in FP vs FN |
| cg19865425 | 0.288   | 0.645   | -0.357    | 3e-07            | NA                    | Hypomethylated in FP vs FN |
| cg06560760 | 0.146   | 0.469   | -0.324    | 3e-07            | ARMC3                 | Hypomethylated in FP vs FN |
| cg05662839 | 0.477   | 0.794   | -0.317    | 3e-07            | NA                    | Hypomethylated in FP vs FN |
| cg27424326 | 0.607   | 0.878   | -0.271    | 3e-07            | NA                    | Hypomethylated in FP vs FN |
| cg06551996 | 0.284   | 0.608   | -0.325    | 3e-07            | NAV2                  | Hypomethylated in FP vs FN |
| cg02102456 | 0.334   | 0.697   | -0.364    | 3e-07            | NA                    | Hypomethylated in FP vs FN |
| cg18669406 | 0.413   | 0.736   | -0.323    | 3e-07            | NA                    | Hypomethylated in FP vs FN |
| cg24727133 | 0.135   | 0.573   | -0.438    | 3e-07            | CHFR                  | Hypomethylated in FP vs FN |
| cg14041921 | 0.395   | 0.762   | -0.367    | 3e-07            | NA                    | Hypomethylated in FP vs FN |

### Supplementary Table 7 (continued)

| Probe      | FP.mean | FN.mean | Mean.diff | Adjusted.P.value | Promoter.related.gene | Category                   |
|------------|---------|---------|-----------|------------------|-----------------------|----------------------------|
| cg09277532 | 0.365   | 0.661   | -0.296    | 3e-07            | CCDC102A              | Hypomethylated in FP vs FN |
| cg05339066 | 0.137   | 0.575   | -0.438    | 3e-07            | RNLS                  | Hypomethylated in FP vs FN |
| cg20146030 | 0.118   | 0.620   | -0.502    | 3e-07            | GALNT3                | Hypomethylated in FP vs FN |
| cg18535410 | 0.397   | 0.691   | -0.294    | 3e-07            | NA                    | Hypomethylated in FP vs FN |
| cg02500443 | 0.298   | 0.621   | -0.323    | 3e-07            | NA                    | Hypomethylated in FP vs FN |
| cg03188976 | 0.231   | 0.519   | -0.288    | 3e-07            | NA                    | Hypomethylated in FP vs FN |
| cg09076123 | 0.465   | 0.732   | -0.267    | 3e-07            | NCF2                  | Hypomethylated in FP vs FN |
| cg15996947 | 0.499   | 0.800   | -0.301    | 3e-07            | L2HGDH                | Hypomethylated in FP vs FN |
| cg23955675 | 0.492   | 0.759   | -0.267    | 3e-07            | NA                    | Hypomethylated in FP vs FN |
| cg05438378 | 0.236   | 0.571   | -0.335    | 3e-07            | NA                    | Hypomethylated in FP vs FN |
| cg14571092 | 0.347   | 0.610   | -0.263    | 3e-07            | NA                    | Hypomethylated in FP vs FN |
| cg09141450 | 0.390   | 0.751   | -0.361    | 3e-07            | NA                    | Hypomethylated in FP vs FN |
| cg10722799 | 0.118   | 0.558   | -0.440    | 3e-07            | CLIC6                 | Hypomethylated in FP vs FN |
| cg21138542 | 0.367   | 0.656   | -0.289    | 3e-07            | NA                    | Hypomethylated in FP vs FN |
| cg15014679 | 0.456   | 0.731   | -0.275    | 3e-07            | NA                    | Hypomethylated in FP vs FN |
| cg17185953 | 0.192   | 0.600   | -0.407    | 3e-07            | ECHDC2                | Hypomethylated in FP vs FN |
| cg23904955 | 0.255   | 0.681   | -0.426    | 3e-07            | NA                    | Hypomethylated in FP vs FN |
| cg16170838 | 0.589   | 0.852   | -0.263    | 3e-07            | NA                    | Hypomethylated in FP vs FN |
| cg19756358 | 0.200   | 0.487   | -0.287    | 3e-07            | NA                    | Hypomethylated in FP vs FN |
| cg21141329 | 0.293   | 0.545   | -0.252    | 3e-07            | NA                    | Hypomethylated in FP vs FN |
| cg21146652 | 0.485   | 0.836   | -0.350    | 3e-07            | NA                    | Hypomethylated in FP vs FN |
| cg20379007 | 0.334   | 0.610   | -0.275    | 3e-07            | NA                    | Hypomethylated in FP vs FN |
| cg05071677 | 0.482   | 0.789   | -0.307    | 3e-07            | OR2V2                 | Hypomethylated in FP vs FN |
| cg26926765 | 0.321   | 0.628   | -0.307    | 3e-07            | NA                    | Hypomethylated in FP vs FN |
| cg03998104 | 0.176   | 0.542   | -0.366    | 3e-07            | NA                    | Hypomethylated in FP vs FN |

**Supplementary Table 7 (continued)**

| Probe      | FP.mean | FN.mean | Mean.diff | Adjusted.P.value | Promoter.related.gene | Category                   |
|------------|---------|---------|-----------|------------------|-----------------------|----------------------------|
| cg23448165 | 0.472   | 0.794   | -0.322    | 3e-07            | NA                    | Hypomethylated in FP vs FN |
| cg00574639 | 0.501   | 0.779   | -0.278    | 3e-07            | NA                    | Hypomethylated in FP vs FN |
| cg08824847 | 0.441   | 0.705   | -0.264    | 3e-07            | NA                    | Hypomethylated in FP vs FN |
| cg19564408 | 0.390   | 0.788   | -0.398    | 3e-07            | NA                    | Hypomethylated in FP vs FN |
| cg25947489 | 0.500   | 0.781   | -0.281    | 3e-07            | NA                    | Hypomethylated in FP vs FN |
| cg01622437 | 0.110   | 0.543   | -0.433    | 3e-07            | NA                    | Hypomethylated in FP vs FN |
| cg15383322 | 0.206   | 0.593   | -0.386    | 3e-07            | NA                    | Hypomethylated in FP vs FN |
| cg27598340 | 0.656   | 0.939   | -0.283    | 3e-07            | NA                    | Hypomethylated in FP vs FN |
| cg24454829 | 0.243   | 0.590   | -0.347    | 3e-07            | NA                    | Hypomethylated in FP vs FN |
| cg25649895 | 0.550   | 0.824   | -0.274    | 4e-07            | NA                    | Hypomethylated in FP vs FN |
| cg05908241 | 0.285   | 0.567   | -0.282    | 4e-07            | NA                    | Hypomethylated in FP vs FN |
| cg24617723 | 0.139   | 0.527   | -0.388    | 4e-07            | ZSWIM2                | Hypomethylated in FP vs FN |
| cg20567895 | 0.296   | 0.713   | -0.417    | 4e-07            | NA                    | Hypomethylated in FP vs FN |
| cg10850080 | 0.193   | 0.613   | -0.420    | 4e-07            | CPXM1                 | Hypomethylated in FP vs FN |
| cg23812660 | 0.473   | 0.835   | -0.362    | 4e-07            | NA                    | Hypomethylated in FP vs FN |
| cg01443408 | 0.486   | 0.794   | -0.308    | 4e-07            | NA                    | Hypomethylated in FP vs FN |
| cg12868312 | 0.439   | 0.776   | -0.337    | 4e-07            | NA                    | Hypomethylated in FP vs FN |
| cg12513880 | 0.099   | 0.568   | -0.469    | 4e-07            | NA                    | Hypomethylated in FP vs FN |
| cg26947817 | 0.577   | 0.868   | -0.292    | 4e-07            | NA                    | Hypomethylated in FP vs FN |
| cg12200716 | 0.329   | 0.656   | -0.327    | 4e-07            | NA                    | Hypomethylated in FP vs FN |
| cg07147958 | 0.510   | 0.823   | -0.313    | 4e-07            | NA                    | Hypomethylated in FP vs FN |
| cg26639906 | 0.575   | 0.886   | -0.311    | 4e-07            | NA                    | Hypomethylated in FP vs FN |
| cg02109484 | 0.351   | 0.762   | -0.411    | 4e-07            | C2orf65               | Hypomethylated in FP vs FN |
| cg24805559 | 0.483   | 0.805   | -0.322    | 4e-07            | NA                    | Hypomethylated in FP vs FN |
| cg26114642 | 0.093   | 0.513   | -0.420    | 4e-07            | TTC27                 | Hypomethylated in FP vs FN |

### Supplementary Table 7 (continued)

| Probe      | FP.mean | FN.mean | Mean.diff | Adjusted.P.value | Promoter.related.gene | Category                   |
|------------|---------|---------|-----------|------------------|-----------------------|----------------------------|
| cg10307152 | 0.398   | 0.668   | -0.270    | 4e-07            | NA                    | Hypomethylated in FP vs FN |
| cg00397274 | 0.539   | 0.843   | -0.304    | 4e-07            | NA                    | Hypomethylated in FP vs FN |
| cg04111102 | 0.226   | 0.526   | -0.300    | 4e-07            | NA                    | Hypomethylated in FP vs FN |
| cg06541222 | 0.204   | 0.569   | -0.365    | 4e-07            | NA                    | Hypomethylated in FP vs FN |
| cg18736141 | 0.219   | 0.528   | -0.309    | 4e-07            | NA                    | Hypomethylated in FP vs FN |
| cg24497819 | 0.465   | 0.755   | -0.291    | 4e-07            | SELPLG                | Hypomethylated in FP vs FN |
| cg18769074 | 0.163   | 0.440   | -0.277    | 4e-07            | TF                    | Hypomethylated in FP vs FN |
| cg05578480 | 0.344   | 0.695   | -0.351    | 4e-07            | NA                    | Hypomethylated in FP vs FN |
| cg01719494 | 0.448   | 0.824   | -0.376    | 4e-07            | NA                    | Hypomethylated in FP vs FN |
| cg13391455 | 0.418   | 0.776   | -0.358    | 4e-07            | NA                    | Hypomethylated in FP vs FN |
| cg04929612 | 0.321   | 0.635   | -0.314    | 4e-07            | NA                    | Hypomethylated in FP vs FN |
| cg02066277 | 0.528   | 0.801   | -0.274    | 4e-07            | NA                    | Hypomethylated in FP vs FN |
| cg04566159 | 0.230   | 0.680   | -0.450    | 4e-07            | ACP5                  | Hypomethylated in FP vs FN |
| cg14494623 | 0.077   | 0.488   | -0.412    | 4e-07            | NA                    | Hypomethylated in FP vs FN |
| cg22879515 | 0.104   | 0.643   | -0.539    | 4e-07            | MIR34B_BTG4_MIR34C    | Hypomethylated in FP vs FN |
| cg20681321 | 0.575   | 0.831   | -0.256    | 4e-07            | NA                    | Hypomethylated in FP vs FN |
| cg12305265 | 0.377   | 0.726   | -0.349    | 4e-07            | NA                    | Hypomethylated in FP vs FN |
| cg23458843 | 0.312   | 0.644   | -0.332    | 4e-07            | AGAP2                 | Hypomethylated in FP vs FN |
| cg09775533 | 0.145   | 0.632   | -0.487    | 4e-07            | NA                    | Hypomethylated in FP vs FN |
| cg07310406 | 0.387   | 0.677   | -0.289    | 4e-07            | MLC1                  | Hypomethylated in FP vs FN |
| cg19329999 | 0.560   | 0.863   | -0.303    | 4e-07            | NA                    | Hypomethylated in FP vs FN |
| cg10308785 | 0.167   | 0.654   | -0.487    | 4e-07            | NA                    | Hypomethylated in FP vs FN |
| cg06293049 | 0.577   | 0.844   | -0.267    | 4e-07            | NA                    | Hypomethylated in FP vs FN |
| cg24453580 | 0.086   | 0.601   | -0.515    | 4e-07            | NA                    | Hypomethylated in FP vs FN |
| cg16671238 | 0.491   | 0.747   | -0.256    | 4e-07            | NA                    | Hypomethylated in FP vs FN |

### Supplementary Table 7 (continued)

| Probe      | FP.mean | FN.mean | Mean.diff | Adjusted.P.value | Promoter.related.gene | Category                   |
|------------|---------|---------|-----------|------------------|-----------------------|----------------------------|
| cg23677780 | 0.542   | 0.803   | -0.261    | 4e-07            | NA                    | Hypomethylated in FP vs FN |
| cg12948116 | 0.264   | 0.698   | -0.434    | 4e-07            | NA                    | Hypomethylated in FP vs FN |
| cg08065374 | 0.431   | 0.756   | -0.325    | 4e-07            | NA                    | Hypomethylated in FP vs FN |
| cg26992603 | 0.208   | 0.618   | -0.409    | 4e-07            | NA                    | Hypomethylated in FP vs FN |
| cg14744919 | 0.529   | 0.843   | -0.313    | 4e-07            | NA                    | Hypomethylated in FP vs FN |
| cg12488810 | 0.537   | 0.798   | -0.262    | 4e-07            | NA                    | Hypomethylated in FP vs FN |
| cg27545565 | 0.455   | 0.759   | -0.303    | 4e-07            | NA                    | Hypomethylated in FP vs FN |
| cg22329743 | 0.524   | 0.834   | -0.310    | 4e-07            | NA                    | Hypomethylated in FP vs FN |
| cg00865541 | 0.559   | 0.824   | -0.265    | 4e-07            | NA                    | Hypomethylated in FP vs FN |
| cg07459489 | 0.542   | 0.823   | -0.281    | 4e-07            | SLC30A8               | Hypomethylated in FP vs FN |
| cg25123566 | 0.207   | 0.524   | -0.317    | 4e-07            | LOC100233209          | Hypomethylated in FP vs FN |
| cg02092102 | 0.235   | 0.618   | -0.383    | 4e-07            | NA                    | Hypomethylated in FP vs FN |
| cg15602972 | 0.490   | 0.767   | -0.277    | 4e-07            | NA                    | Hypomethylated in FP vs FN |
| cg06650364 | 0.468   | 0.838   | -0.370    | 4e-07            | C4orf52               | Hypomethylated in FP vs FN |
| cg08097359 | 0.400   | 0.728   | -0.327    | 4e-07            | NA                    | Hypomethylated in FP vs FN |
| cg06250135 | 0.593   | 0.846   | -0.253    | 4e-07            | NA                    | Hypomethylated in FP vs FN |
| cg07401516 | 0.259   | 0.587   | -0.327    | 4e-07            | NA                    | Hypomethylated in FP vs FN |
| cg04803843 | 0.118   | 0.654   | -0.537    | 4e-07            | NA                    | Hypomethylated in FP vs FN |
| cg19010441 | 0.535   | 0.787   | -0.252    | 4e-07            | NA                    | Hypomethylated in FP vs FN |
| cg12351906 | 0.412   | 0.709   | -0.297    | 4e-07            | NA                    | Hypomethylated in FP vs FN |
| cg16947583 | 0.369   | 0.769   | -0.399    | 4e-07            | NA                    | Hypomethylated in FP vs FN |
| cg05470554 | 0.247   | 0.713   | -0.466    | 4e-07            | WNT16                 | Hypomethylated in FP vs FN |
| cg01035931 | 0.261   | 0.589   | -0.328    | 4e-07            | NA                    | Hypomethylated in FP vs FN |
| cg14049807 | 0.548   | 0.851   | -0.302    | 4e-07            | NA                    | Hypomethylated in FP vs FN |
| cg17786642 | 0.186   | 0.641   | -0.454    | 4e-07            | NA                    | Hypomethylated in FP vs FN |

### Supplementary Table 7 (continued)

| Probe      | FP.mean | FN.mean | Mean.diff | Adjusted.P.value | Promoter.related.gene | Category                   |
|------------|---------|---------|-----------|------------------|-----------------------|----------------------------|
| cg06746492 | 0.534   | 0.823   | -0.289    | 4e-07            | SCN7A                 | Hypomethylated in FP vs FN |
| cg05807157 | 0.409   | 0.730   | -0.321    | 4e-07            | NA                    | Hypomethylated in FP vs FN |
| cg05217213 | 0.535   | 0.803   | -0.267    | 4e-07            | AKIRIN2               | Hypomethylated in FP vs FN |
| cg05802073 | 0.219   | 0.504   | -0.285    | 4e-07            | NA                    | Hypomethylated in FP vs FN |
| cg13849232 | 0.466   | 0.768   | -0.302    | 4e-07            | NA                    | Hypomethylated in FP vs FN |
| cg01181499 | 0.484   | 0.788   | -0.303    | 4e-07            | NA                    | Hypomethylated in FP vs FN |
| cg23634401 | 0.283   | 0.603   | -0.320    | 4e-07            | NA                    | Hypomethylated in FP vs FN |
| cg12531611 | 0.522   | 0.836   | -0.314    | 4e-07            | NA                    | Hypomethylated in FP vs FN |
| cg10577819 | 0.409   | 0.753   | -0.344    | 4e-07            | NA                    | Hypomethylated in FP vs FN |
| cg00128386 | 0.370   | 0.721   | -0.351    | 4e-07            | NA                    | Hypomethylated in FP vs FN |
| cg16425726 | 0.470   | 0.876   | -0.406    | 4e-07            | NA                    | Hypomethylated in FP vs FN |
| cg04336905 | 0.420   | 0.781   | -0.360    | 4e-07            | NA                    | Hypomethylated in FP vs FN |
| cg02840092 | 0.386   | 0.765   | -0.378    | 4e-07            | NA                    | Hypomethylated in FP vs FN |
| cg21726618 | 0.487   | 0.783   | -0.297    | 4e-07            | NA                    | Hypomethylated in FP vs FN |
| cg26185500 | 0.357   | 0.728   | -0.371    | 4e-07            | NA                    | Hypomethylated in FP vs FN |
| cg21415035 | 0.436   | 0.699   | -0.263    | 4e-07            | ACVRL1                | Hypomethylated in FP vs FN |
| cg01226742 | 0.563   | 0.825   | -0.262    | 4e-07            | NA                    | Hypomethylated in FP vs FN |
| cg09155997 | 0.140   | 0.588   | -0.447    | 4e-07            | NA                    | Hypomethylated in FP vs FN |
| cg09789315 | 0.447   | 0.718   | -0.270    | 4e-07            | NA                    | Hypomethylated in FP vs FN |
| cg14472366 | 0.425   | 0.788   | -0.363    | 4e-07            | NA                    | Hypomethylated in FP vs FN |
| cg11603201 | 0.498   | 0.783   | -0.285    | 4e-07            | NA                    | Hypomethylated in FP vs FN |
| cg04470072 | 0.249   | 0.613   | -0.363    | 4e-07            | PSKH2                 | Hypomethylated in FP vs FN |
| cg04763558 | 0.385   | 0.739   | -0.354    | 4e-07            | NA                    | Hypomethylated in FP vs FN |
| cg17888390 | 0.125   | 0.643   | -0.519    | 4e-07            | NA                    | Hypomethylated in FP vs FN |
| cg08083700 | 0.549   | 0.831   | -0.282    | 4e-07            | CMTM5                 | Hypomethylated in FP vs FN |



### Supplementary Table 7 (continued)

| Probe      | FP.mean | FN.mean | Mean.diff | Adjusted.P.value | Promoter.related.gene | Category                   |
|------------|---------|---------|-----------|------------------|-----------------------|----------------------------|
| cg10396546 | 0.105   | 0.572   | -0.467    | 4e-07            | ZSWIM2                | Hypomethylated in FP vs FN |
| cg22732749 | 0.380   | 0.733   | -0.353    | 5e-07            | PCDHB15               | Hypomethylated in FP vs FN |
| cg03510511 | 0.558   | 0.834   | -0.276    | 5e-07            | NA                    | Hypomethylated in FP vs FN |
| cg07108118 | 0.476   | 0.819   | -0.343    | 5e-07            | NA                    | Hypomethylated in FP vs FN |
| cg22663660 | 0.511   | 0.796   | -0.285    | 5e-07            | NA                    | Hypomethylated in FP vs FN |
| cg23162167 | 0.400   | 0.689   | -0.288    | 5e-07            | NA                    | Hypomethylated in FP vs FN |
| cg22396878 | 0.592   | 0.861   | -0.269    | 5e-07            | NA                    | Hypomethylated in FP vs FN |
| cg21022732 | 0.189   | 0.652   | -0.463    | 5e-07            | EFCAB10               | Hypomethylated in FP vs FN |
| cg20099968 | 0.581   | 0.847   | -0.265    | 5e-07            | NA                    | Hypomethylated in FP vs FN |
| cg07667765 | 0.375   | 0.656   | -0.281    | 5e-07            | NA                    | Hypomethylated in FP vs FN |
| cg19027424 | 0.329   | 0.587   | -0.258    | 5e-07            | NA                    | Hypomethylated in FP vs FN |
| cg05927190 | 0.153   | 0.571   | -0.418    | 5e-07            | NA                    | Hypomethylated in FP vs FN |
| cg10692363 | 0.343   | 0.673   | -0.330    | 5e-07            | NA                    | Hypomethylated in FP vs FN |
| cg16936060 | 0.429   | 0.752   | -0.323    | 5e-07            | HOPX                  | Hypomethylated in FP vs FN |
| cg19827923 | 0.479   | 0.772   | -0.293    | 5e-07            | GPR55                 | Hypomethylated in FP vs FN |
| cg20939830 | 0.380   | 0.742   | -0.362    | 5e-07            | NA                    | Hypomethylated in FP vs FN |
| cg23524290 | 0.415   | 0.735   | -0.320    | 5e-07            | PDE4A                 | Hypomethylated in FP vs FN |
| cg23100081 | 0.352   | 0.676   | -0.324    | 5e-07            | NA                    | Hypomethylated in FP vs FN |
| cg19460095 | 0.387   | 0.679   | -0.292    | 5e-07            | NA                    | Hypomethylated in FP vs FN |
| cg02353448 | 0.454   | 0.781   | -0.327    | 5e-07            | NA                    | Hypomethylated in FP vs FN |
| cg14385738 | 0.250   | 0.554   | -0.304    | 5e-07            | PTPN22                | Hypomethylated in FP vs FN |
| cg00567872 | 0.381   | 0.795   | -0.414    | 5e-07            | NA                    | Hypomethylated in FP vs FN |
| cg17574739 | 0.317   | 0.650   | -0.333    | 5e-07            | SYCN                  | Hypomethylated in FP vs FN |
| cg15644634 | 0.194   | 0.458   | -0.264    | 5e-07            | NA                    | Hypomethylated in FP vs FN |
| cg09247084 | 0.488   | 0.745   | -0.257    | 5e-07            | NA                    | Hypomethylated in FP vs FN |

### Supplementary Table 7 (continued)

| Probe      | FP.mean | FN.mean | Mean.diff | Adjusted.P.value | Promoter.related.gene | Category                   |
|------------|---------|---------|-----------|------------------|-----------------------|----------------------------|
| cg07664061 | 0.535   | 0.820   | -0.285    | 5e-07            | NA                    | Hypomethylated in FP vs FN |
| cg00544557 | 0.515   | 0.823   | -0.308    | 5e-07            | NA                    | Hypomethylated in FP vs FN |
| cg01440070 | 0.485   | 0.769   | -0.284    | 5e-07            | NA                    | Hypomethylated in FP vs FN |
| cg03957547 | 0.599   | 0.861   | -0.261    | 5e-07            | NA                    | Hypomethylated in FP vs FN |
| cg07870541 | 0.401   | 0.722   | -0.321    | 5e-07            | NA                    | Hypomethylated in FP vs FN |
| cg21158795 | 0.424   | 0.675   | -0.251    | 5e-07            | NA                    | Hypomethylated in FP vs FN |
| cg07708487 | 0.279   | 0.632   | -0.353    | 5e-07            | NA                    | Hypomethylated in FP vs FN |
| cg00971827 | 0.463   | 0.740   | -0.277    | 5e-07            | NA                    | Hypomethylated in FP vs FN |
| cg09326843 | 0.395   | 0.677   | -0.282    | 5e-07            | NA                    | Hypomethylated in FP vs FN |
| cg24219974 | 0.283   | 0.599   | -0.315    | 5e-07            | NA                    | Hypomethylated in FP vs FN |
| cg03406106 | 0.348   | 0.684   | -0.336    | 5e-07            | PKD1L2                | Hypomethylated in FP vs FN |
| cg00497472 | 0.396   | 0.741   | -0.345    | 5e-07            | NA                    | Hypomethylated in FP vs FN |
| cg11773456 | 0.538   | 0.817   | -0.280    | 5e-07            | NA                    | Hypomethylated in FP vs FN |
| cg27571769 | 0.382   | 0.664   | -0.281    | 5e-07            | NA                    | Hypomethylated in FP vs FN |
| cg19542987 | 0.268   | 0.724   | -0.456    | 5e-07            | ARMC3                 | Hypomethylated in FP vs FN |
| cg22102688 | 0.139   | 0.497   | -0.358    | 5e-07            | NA                    | Hypomethylated in FP vs FN |
| cg21595409 | 0.366   | 0.652   | -0.286    | 5e-07            | NA                    | Hypomethylated in FP vs FN |
| cg12382333 | 0.621   | 0.874   | -0.253    | 5e-07            | NA                    | Hypomethylated in FP vs FN |
| cg04296289 | 0.592   | 0.851   | -0.258    | 5e-07            | NA                    | Hypomethylated in FP vs FN |
| cg21090033 | 0.326   | 0.706   | -0.380    | 5e-07            | TM4SF19               | Hypomethylated in FP vs FN |
| cg19572051 | 0.571   | 0.849   | -0.278    | 5e-07            | NA                    | Hypomethylated in FP vs FN |
| cg08377819 | 0.303   | 0.703   | -0.401    | 5e-07            | NA                    | Hypomethylated in FP vs FN |
| cg10835986 | 0.440   | 0.722   | -0.282    | 5e-07            | NA                    | Hypomethylated in FP vs FN |
| cg22975671 | 0.235   | 0.603   | -0.368    | 5e-07            | BCL6B                 | Hypomethylated in FP vs FN |
| cg05614735 | 0.233   | 0.639   | -0.406    | 5e-07            | NA                    | Hypomethylated in FP vs FN |

### Supplementary Table 7 (continued)

| Probe      | FP.mean | FN.mean | Mean.diff | Adjusted.P.value | Promoter.related.gene | Category                   |
|------------|---------|---------|-----------|------------------|-----------------------|----------------------------|
| cg08870893 | 0.375   | 0.711   | -0.336    | 5e-07            | C8orf85               | Hypomethylated in FP vs FN |
| cg20982735 | 0.214   | 0.605   | -0.392    | 5e-07            | PSKH2                 | Hypomethylated in FP vs FN |
| cg23787937 | 0.373   | 0.778   | -0.404    | 5e-07            | NA                    | Hypomethylated in FP vs FN |
| cg13908988 | 0.393   | 0.735   | -0.343    | 5e-07            | NA                    | Hypomethylated in FP vs FN |
| cg00041401 | 0.204   | 0.465   | -0.262    | 5e-07            | PTPN22                | Hypomethylated in FP vs FN |
| cg01520122 | 0.414   | 0.800   | -0.386    | 5e-07            | CCL7                  | Hypomethylated in FP vs FN |
| cg24617568 | 0.138   | 0.511   | -0.373    | 5e-07            | DPY19L2P4             | Hypomethylated in FP vs FN |
| cg21630608 | 0.392   | 0.712   | -0.320    | 5e-07            | SFRP2                 | Hypomethylated in FP vs FN |
| cg16655240 | 0.163   | 0.662   | -0.498    | 5e-07            | NA                    | Hypomethylated in FP vs FN |
| cg01714342 | 0.372   | 0.690   | -0.319    | 5e-07            | RIPK3                 | Hypomethylated in FP vs FN |
| cg00751332 | 0.204   | 0.461   | -0.257    | 5e-07            | CABLES1               | Hypomethylated in FP vs FN |
| cg23827488 | 0.110   | 0.369   | -0.259    | 5e-07            | NA                    | Hypomethylated in FP vs FN |
| cg07651189 | 0.393   | 0.674   | -0.281    | 5e-07            | MEPE                  | Hypomethylated in FP vs FN |
| cg04908088 | 0.332   | 0.634   | -0.302    | 5e-07            | NA                    | Hypomethylated in FP vs FN |
| cg13351061 | 0.450   | 0.734   | -0.284    | 5e-07            | NA                    | Hypomethylated in FP vs FN |
| cg25975689 | 0.281   | 0.592   | -0.311    | 5e-07            | NA                    | Hypomethylated in FP vs FN |
| cg26496628 | 0.358   | 0.703   | -0.345    | 5e-07            | NA                    | Hypomethylated in FP vs FN |
| cg11313951 | 0.479   | 0.758   | -0.278    | 5e-07            | NA                    | Hypomethylated in FP vs FN |
| cg18266594 | 0.456   | 0.762   | -0.306    | 5e-07            | NA                    | Hypomethylated in FP vs FN |
| cg11246233 | 0.432   | 0.749   | -0.317    | 5e-07            | NA                    | Hypomethylated in FP vs FN |
| cg14531437 | 0.552   | 0.825   | -0.273    | 5e-07            | NA                    | Hypomethylated in FP vs FN |
| cg18960216 | 0.548   | 0.809   | -0.262    | 5e-07            | TIAF1                 | Hypomethylated in FP vs FN |
| cg26876703 | 0.590   | 0.846   | -0.257    | 5e-07            | NA                    | Hypomethylated in FP vs FN |
| cg17651381 | 0.222   | 0.489   | -0.267    | 5e-07            | NA                    | Hypomethylated in FP vs FN |
| cg17780092 | 0.338   | 0.625   | -0.287    | 5e-07            | NA                    | Hypomethylated in FP vs FN |

### Supplementary Table 7 (continued)

| Probe      | FP.mean | FN.mean | Mean.diff | Adjusted.P.value | Promoter.related.gene | Category                   |
|------------|---------|---------|-----------|------------------|-----------------------|----------------------------|
| cg02867735 | 0.349   | 0.624   | -0.274    | 5e-07            | NA                    | Hypomethylated in FP vs FN |
| cg17774960 | 0.366   | 0.732   | -0.366    | 5e-07            | NA                    | Hypomethylated in FP vs FN |
| cg12106728 | 0.093   | 0.557   | -0.464    | 5e-07            | NA                    | Hypomethylated in FP vs FN |
| cg06827247 | 0.133   | 0.593   | -0.460    | 5e-07            | C3orf55               | Hypomethylated in FP vs FN |
| cg09642951 | 0.150   | 0.589   | -0.439    | 6e-07            | EPHA1                 | Hypomethylated in FP vs FN |
| cg06516124 | 0.318   | 0.701   | -0.383    | 6e-07            | NA                    | Hypomethylated in FP vs FN |
| cg05477920 | 0.449   | 0.726   | -0.277    | 6e-07            | NA                    | Hypomethylated in FP vs FN |
| cg16389078 | 0.420   | 0.743   | -0.323    | 6e-07            | NA                    | Hypomethylated in FP vs FN |
| cg07844828 | 0.387   | 0.718   | -0.331    | 6e-07            | NA                    | Hypomethylated in FP vs FN |
| cg24087743 | 0.151   | 0.649   | -0.498    | 6e-07            | NA                    | Hypomethylated in FP vs FN |
| cg03715305 | 0.336   | 0.619   | -0.283    | 6e-07            | NA                    | Hypomethylated in FP vs FN |
| cg16086109 | 0.408   | 0.706   | -0.298    | 6e-07            | DUOXA1                | Hypomethylated in FP vs FN |
| cg15082875 | 0.459   | 0.731   | -0.273    | 6e-07            | NA                    | Hypomethylated in FP vs FN |
| cg12778938 | 0.582   | 0.841   | -0.259    | 6e-07            | NA                    | Hypomethylated in FP vs FN |
| cg14758740 | 0.442   | 0.751   | -0.308    | 6e-07            | NA                    | Hypomethylated in FP vs FN |
| cg08705483 | 0.375   | 0.712   | -0.337    | 6e-07            | NA                    | Hypomethylated in FP vs FN |
| cg09276531 | 0.548   | 0.813   | -0.265    | 6e-07            | NA                    | Hypomethylated in FP vs FN |
| cg01446515 | 0.200   | 0.582   | -0.382    | 6e-07            | GJB6                  | Hypomethylated in FP vs FN |
| cg03064403 | 0.377   | 0.709   | -0.333    | 6e-07            | NA                    | Hypomethylated in FP vs FN |
| cg11692852 | 0.148   | 0.569   | -0.421    | 6e-07            | MLPH                  | Hypomethylated in FP vs FN |
| cg04198125 | 0.531   | 0.801   | -0.270    | 6e-07            | NA                    | Hypomethylated in FP vs FN |
| cg06817454 | 0.501   | 0.796   | -0.295    | 6e-07            | NA                    | Hypomethylated in FP vs FN |
| cg08941639 | 0.211   | 0.464   | -0.253    | 6e-07            | NA                    | Hypomethylated in FP vs FN |
| cg18294691 | 0.114   | 0.560   | -0.446    | 6e-07            | NA                    | Hypomethylated in FP vs FN |
| cg10632209 | 0.261   | 0.566   | -0.305    | 6e-07            | NA                    | Hypomethylated in FP vs FN |

### Supplementary Table 7 (continued)

| Probe      | FP.mean | FN.mean | Mean.diff | Adjusted.P.value | Promoter.related.gene | Category                   |
|------------|---------|---------|-----------|------------------|-----------------------|----------------------------|
| cg08038178 | 0.384   | 0.722   | -0.338    | 6e-07            | NA                    | Hypomethylated in FP vs FN |
| cg06255609 | 0.542   | 0.843   | -0.301    | 6e-07            | NA                    | Hypomethylated in FP vs FN |
| cg14762973 | 0.131   | 0.589   | -0.458    | 6e-07            | ZSWIM2                | Hypomethylated in FP vs FN |
| cg17075865 | 0.631   | 0.889   | -0.258    | 6e-07            | NA                    | Hypomethylated in FP vs FN |
| cg25750209 | 0.475   | 0.765   | -0.289    | 6e-07            | NA                    | Hypomethylated in FP vs FN |
| cg26864691 | 0.472   | 0.813   | -0.341    | 6e-07            | NA                    | Hypomethylated in FP vs FN |
| cg17246606 | 0.460   | 0.773   | -0.313    | 6e-07            | NA                    | Hypomethylated in FP vs FN |
| cg03507218 | 0.487   | 0.747   | -0.260    | 6e-07            | NA                    | Hypomethylated in FP vs FN |
| cg14485901 | 0.338   | 0.601   | -0.263    | 6e-07            | NA                    | Hypomethylated in FP vs FN |
| cg18612612 | 0.522   | 0.782   | -0.261    | 6e-07            | NA                    | Hypomethylated in FP vs FN |
| cg15359321 | 0.417   | 0.692   | -0.275    | 6e-07            | NA                    | Hypomethylated in FP vs FN |
| cg10640284 | 0.438   | 0.765   | -0.327    | 6e-07            | SEL1L2                | Hypomethylated in FP vs FN |
| cg22335261 | 0.468   | 0.810   | -0.341    | 6e-07            | NA                    | Hypomethylated in FP vs FN |
| cg17017746 | 0.299   | 0.644   | -0.345    | 6e-07            | NA                    | Hypomethylated in FP vs FN |
| cg05158146 | 0.491   | 0.797   | -0.306    | 6e-07            | NA                    | Hypomethylated in FP vs FN |
| cg20454400 | 0.201   | 0.579   | -0.378    | 6e-07            | NA                    | Hypomethylated in FP vs FN |
| cg26545313 | 0.380   | 0.642   | -0.262    | 6e-07            | NA                    | Hypomethylated in FP vs FN |
| cg25848582 | 0.531   | 0.816   | -0.285    | 6e-07            | NA                    | Hypomethylated in FP vs FN |
| cg26366087 | 0.493   | 0.796   | -0.302    | 6e-07            | NA                    | Hypomethylated in FP vs FN |
| cg26003455 | 0.243   | 0.586   | -0.343    | 6e-07            | NA                    | Hypomethylated in FP vs FN |
| cg05045817 | 0.279   | 0.665   | -0.386    | 6e-07            | NA                    | Hypomethylated in FP vs FN |
| cg18829162 | 0.559   | 0.855   | -0.296    | 6e-07            | NA                    | Hypomethylated in FP vs FN |
| cg12432709 | 0.547   | 0.829   | -0.282    | 6e-07            | CCDC68                | Hypomethylated in FP vs FN |
| cg19098619 | 0.328   | 0.733   | -0.405    | 6e-07            | NA                    | Hypomethylated in FP vs FN |
| cg22831526 | 0.318   | 0.676   | -0.358    | 6e-07            | NA                    | Hypomethylated in FP vs FN |

### Supplementary Table 7 (continued)

| Probe      | FP.mean | FN.mean | Mean.diff | Adjusted.P.value | Promoter.related.gene | Category                   |
|------------|---------|---------|-----------|------------------|-----------------------|----------------------------|
| cg13855715 | 0.353   | 0.739   | -0.386    | 6e-07            | NA                    | Hypomethylated in FP vs FN |
| cg18533833 | 0.081   | 0.495   | -0.415    | 6e-07            | CHFR                  | Hypomethylated in FP vs FN |
| cg15193782 | 0.146   | 0.540   | -0.394    | 6e-07            | ARMC3                 | Hypomethylated in FP vs FN |
| cg11017804 | 0.433   | 0.788   | -0.354    | 6e-07            | NA                    | Hypomethylated in FP vs FN |
| cg07021288 | 0.167   | 0.484   | -0.317    | 6e-07            | NA                    | Hypomethylated in FP vs FN |
| cg00012692 | 0.185   | 0.565   | -0.379    | 6e-07            | GJB6                  | Hypomethylated in FP vs FN |
| cg10955164 | 0.252   | 0.514   | -0.262    | 6e-07            | NA                    | Hypomethylated in FP vs FN |
| cg08664737 | 0.534   | 0.813   | -0.279    | 6e-07            | NA                    | Hypomethylated in FP vs FN |
| cg20368664 | 0.516   | 0.835   | -0.319    | 6e-07            | IL16                  | Hypomethylated in FP vs FN |
| cg12869334 | 0.395   | 0.788   | -0.394    | 6e-07            | NA                    | Hypomethylated in FP vs FN |
| cg26785954 | 0.088   | 0.488   | -0.400    | 6e-07            | TMEM26                | Hypomethylated in FP vs FN |
| cg18595174 | 0.528   | 0.818   | -0.290    | 6e-07            | NA                    | Hypomethylated in FP vs FN |
| cg04478905 | 0.363   | 0.707   | -0.344    | 6e-07            | CLDN14                | Hypomethylated in FP vs FN |
| cg16082644 | 0.242   | 0.555   | -0.314    | 6e-07            | NA                    | Hypomethylated in FP vs FN |
| cg05162320 | 0.534   | 0.845   | -0.311    | 6e-07            | NA                    | Hypomethylated in FP vs FN |
| cg25105522 | 0.266   | 0.647   | -0.381    | 6e-07            | NA                    | Hypomethylated in FP vs FN |
| cg14519294 | 0.107   | 0.416   | -0.308    | 6e-07            | CHFR                  | Hypomethylated in FP vs FN |
| cg26554054 | 0.480   | 0.759   | -0.279    | 6e-07            | NA                    | Hypomethylated in FP vs FN |
| cg03048162 | 0.386   | 0.729   | -0.343    | 6e-07            | NA                    | Hypomethylated in FP vs FN |
| cg04896706 | 0.189   | 0.593   | -0.403    | 6e-07            | NA                    | Hypomethylated in FP vs FN |
| cg01204911 | 0.310   | 0.675   | -0.365    | 6e-07            | NA                    | Hypomethylated in FP vs FN |
| cg20436707 | 0.574   | 0.837   | -0.262    | 6e-07            | NA                    | Hypomethylated in FP vs FN |
| cg03089475 | 0.352   | 0.671   | -0.319    | 6e-07            | NA                    | Hypomethylated in FP vs FN |
| cg19617672 | 0.183   | 0.528   | -0.344    | 6e-07            | WNT16                 | Hypomethylated in FP vs FN |
| cg02149537 | 0.437   | 0.786   | -0.349    | 6e-07            | NA                    | Hypomethylated in FP vs FN |

### Supplementary Table 7 (continued)

| Probe      | FP.mean | FN.mean | Mean.diff | Adjusted.P.value | Promoter.related.gene | Category                   |
|------------|---------|---------|-----------|------------------|-----------------------|----------------------------|
| cg12050358 | 0.423   | 0.726   | -0.303    | 6e-07            | ARHGAP23              | Hypomethylated in FP vs FN |
| cg25095814 | 0.233   | 0.568   | -0.334    | 6e-07            | CASP8                 | Hypomethylated in FP vs FN |
| cg27642554 | 0.204   | 0.632   | -0.428    | 6e-07            | NA                    | Hypomethylated in FP vs FN |
| cg25480418 | 0.221   | 0.526   | -0.304    | 7e-07            | NA                    | Hypomethylated in FP vs FN |
| cg21253742 | 0.412   | 0.666   | -0.254    | 7e-07            | NA                    | Hypomethylated in FP vs FN |
| cg15972243 | 0.283   | 0.621   | -0.337    | 7e-07            | RNLS                  | Hypomethylated in FP vs FN |
| cg00396910 | 0.484   | 0.834   | -0.350    | 7e-07            | NA                    | Hypomethylated in FP vs FN |
| cg25814969 | 0.482   | 0.777   | -0.295    | 7e-07            | NA                    | Hypomethylated in FP vs FN |
| cg25389874 | 0.566   | 0.839   | -0.274    | 7e-07            | NA                    | Hypomethylated in FP vs FN |
| cg25861066 | 0.551   | 0.829   | -0.278    | 7e-07            | NA                    | Hypomethylated in FP vs FN |
| cg22697574 | 0.211   | 0.583   | -0.372    | 7e-07            | C1orf94               | Hypomethylated in FP vs FN |
| cg23958373 | 0.527   | 0.779   | -0.252    | 7e-07            | NA                    | Hypomethylated in FP vs FN |
| cg10042846 | 0.487   | 0.778   | -0.291    | 7e-07            | CCL13                 | Hypomethylated in FP vs FN |
| cg02315513 | 0.259   | 0.518   | -0.259    | 7e-07            | NA                    | Hypomethylated in FP vs FN |
| cg23759189 | 0.354   | 0.737   | -0.382    | 7e-07            | NA                    | Hypomethylated in FP vs FN |
| cg13169065 | 0.226   | 0.625   | -0.399    | 7e-07            | GALNT3                | Hypomethylated in FP vs FN |
| cg00269659 | 0.376   | 0.663   | -0.287    | 7e-07            | NA                    | Hypomethylated in FP vs FN |
| cg15242225 | 0.370   | 0.682   | -0.312    | 7e-07            | RUNX1                 | Hypomethylated in FP vs FN |
| cg03360907 | 0.348   | 0.651   | -0.302    | 7e-07            | CHRM1                 | Hypomethylated in FP vs FN |
| cg20849835 | 0.423   | 0.771   | -0.348    | 7e-07            | NA                    | Hypomethylated in FP vs FN |
| cg05907046 | 0.129   | 0.613   | -0.484    | 7e-07            | ZSWIM2                | Hypomethylated in FP vs FN |
| cg16201661 | 0.511   | 0.768   | -0.257    | 7e-07            | NA                    | Hypomethylated in FP vs FN |
| cg08529825 | 0.310   | 0.595   | -0.284    | 7e-07            | NA                    | Hypomethylated in FP vs FN |
| cg00790071 | 0.392   | 0.700   | -0.309    | 7e-07            | NA                    | Hypomethylated in FP vs FN |
| cg04035553 | 0.291   | 0.576   | -0.286    | 7e-07            | NA                    | Hypomethylated in FP vs FN |

### Supplementary Table 7 (continued)

| Probe      | FP.mean | FN.mean | Mean.diff | Adjusted.P.value | Promoter.related.gene | Category                   |
|------------|---------|---------|-----------|------------------|-----------------------|----------------------------|
| cg13355574 | 0.362   | 0.788   | -0.426    | 7e-07            | NA                    | Hypomethylated in FP vs FN |
| cg25013052 | 0.354   | 0.711   | -0.357    | 7e-07            | NA                    | Hypomethylated in FP vs FN |
| cg26673975 | 0.413   | 0.847   | -0.435    | 7e-07            | NA                    | Hypomethylated in FP vs FN |
| cg25159149 | 0.332   | 0.646   | -0.314    | 7e-07            | NA                    | Hypomethylated in FP vs FN |
| cg26428825 | 0.461   | 0.767   | -0.307    | 7e-07            | KCNV2                 | Hypomethylated in FP vs FN |
| cg10330187 | 0.550   | 0.833   | -0.282    | 7e-07            | NA                    | Hypomethylated in FP vs FN |
| cg22971402 | 0.339   | 0.697   | -0.358    | 7e-07            | NA                    | Hypomethylated in FP vs FN |
| cg04017102 | 0.314   | 0.664   | -0.350    | 7e-07            | NA                    | Hypomethylated in FP vs FN |
| cg04991214 | 0.434   | 0.750   | -0.316    | 7e-07            | PFDN2                 | Hypomethylated in FP vs FN |
| cg19231602 | 0.436   | 0.768   | -0.331    | 7e-07            | NA                    | Hypomethylated in FP vs FN |
| cg18940674 | 0.428   | 0.769   | -0.340    | 7e-07            | NA                    | Hypomethylated in FP vs FN |
| cg24718722 | 0.213   | 0.625   | -0.413    | 7e-07            | NA                    | Hypomethylated in FP vs FN |
| cg12526346 | 0.225   | 0.592   | -0.367    | 7e-07            | NA                    | Hypomethylated in FP vs FN |
| cg02721947 | 0.373   | 0.764   | -0.391    | 7e-07            | NA                    | Hypomethylated in FP vs FN |
| cg24676071 | 0.283   | 0.763   | -0.480    | 7e-07            | ADCY1                 | Hypomethylated in FP vs FN |
| cg17486860 | 0.292   | 0.697   | -0.405    | 7e-07            | NA                    | Hypomethylated in FP vs FN |
| cg05041871 | 0.428   | 0.738   | -0.311    | 7e-07            | NA                    | Hypomethylated in FP vs FN |
| cg17319956 | 0.593   | 0.860   | -0.267    | 7e-07            | NA                    | Hypomethylated in FP vs FN |
| cg09203312 | 0.249   | 0.604   | -0.355    | 7e-07            | GJB6                  | Hypomethylated in FP vs FN |
| cg17019053 | 0.368   | 0.789   | -0.420    | 7e-07            | C2orf65               | Hypomethylated in FP vs FN |
| cg02138218 | 0.461   | 0.759   | -0.298    | 7e-07            | TNN                   | Hypomethylated in FP vs FN |
| cg12375903 | 0.315   | 0.571   | -0.255    | 7e-07            | NA                    | Hypomethylated in FP vs FN |
| cg06784198 | 0.439   | 0.774   | -0.335    | 7e-07            | NA                    | Hypomethylated in FP vs FN |
| cg14645880 | 0.266   | 0.685   | -0.418    | 7e-07            | NA                    | Hypomethylated in FP vs FN |
| cg20432384 | 0.412   | 0.752   | -0.341    | 7e-07            | NA                    | Hypomethylated in FP vs FN |



### Supplementary Table 7 (continued)

| Probe      | FP.mean | FN.mean | Mean.diff | Adjusted.P.value | Promoter.related.gene | Category                   |
|------------|---------|---------|-----------|------------------|-----------------------|----------------------------|
| cg04275692 | 0.219   | 0.633   | -0.414    | 8e-07            | NA                    | Hypomethylated in FP vs FN |
| cg18803896 | 0.549   | 0.808   | -0.259    | 8e-07            | NA                    | Hypomethylated in FP vs FN |
| cg11182225 | 0.268   | 0.530   | -0.262    | 8e-07            | TAC1                  | Hypomethylated in FP vs FN |
| cg19696870 | 0.392   | 0.785   | -0.393    | 8e-07            | NA                    | Hypomethylated in FP vs FN |
| cg27382164 | 0.095   | 0.536   | -0.442    | 8e-07            | CHFR                  | Hypomethylated in FP vs FN |
| cg06298480 | 0.485   | 0.772   | -0.287    | 8e-07            | NA                    | Hypomethylated in FP vs FN |
| cg21197233 | 0.468   | 0.787   | -0.319    | 8e-07            | NA                    | Hypomethylated in FP vs FN |
| cg27289662 | 0.415   | 0.745   | -0.330    | 8e-07            | NA                    | Hypomethylated in FP vs FN |
| cg13591783 | 0.341   | 0.715   | -0.374    | 8e-07            | NA                    | Hypomethylated in FP vs FN |
| cg26819718 | 0.560   | 0.884   | -0.324    | 8e-07            | NA                    | Hypomethylated in FP vs FN |
| cg05155775 | 0.480   | 0.763   | -0.283    | 8e-07            | SLC30A10              | Hypomethylated in FP vs FN |
| cg04754652 | 0.430   | 0.766   | -0.336    | 8e-07            | GPR171                | Hypomethylated in FP vs FN |
| cg16850192 | 0.452   | 0.787   | -0.335    | 8e-07            | DSG1                  | Hypomethylated in FP vs FN |
| cg16405211 | 0.429   | 0.770   | -0.341    | 8e-07            | NA                    | Hypomethylated in FP vs FN |
| cg22059413 | 0.505   | 0.775   | -0.270    | 8e-07            | NA                    | Hypomethylated in FP vs FN |
| cg03330710 | 0.184   | 0.540   | -0.356    | 8e-07            | NA                    | Hypomethylated in FP vs FN |
| cg23915282 | 0.270   | 0.643   | -0.373    | 8e-07            | NA                    | Hypomethylated in FP vs FN |
| cg08857194 | 0.420   | 0.767   | -0.347    | 8e-07            | NA                    | Hypomethylated in FP vs FN |
| cg19642470 | 0.318   | 0.724   | -0.407    | 8e-07            | NA                    | Hypomethylated in FP vs FN |
| cg21519701 | 0.587   | 0.846   | -0.259    | 8e-07            | NA                    | Hypomethylated in FP vs FN |
| cg13642149 | 0.527   | 0.850   | -0.322    | 8e-07            | NA                    | Hypomethylated in FP vs FN |
| cg12033248 | 0.491   | 0.810   | -0.319    | 8e-07            | NA                    | Hypomethylated in FP vs FN |
| cg14825555 | 0.297   | 0.637   | -0.340    | 8e-07            | SFN                   | Hypomethylated in FP vs FN |
| cg18231184 | 0.416   | 0.685   | -0.269    | 8e-07            | NA                    | Hypomethylated in FP vs FN |
| cg00639615 | 0.504   | 0.801   | -0.297    | 8e-07            | FANCI                 | Hypomethylated in FP vs FN |

### Supplementary Table 7 (continued)

| Probe      | FP.mean | FN.mean | Mean.diff | Adjusted.P.value | Promoter.related.gene | Category                   |
|------------|---------|---------|-----------|------------------|-----------------------|----------------------------|
| cg23895722 | 0.462   | 0.715   | -0.252    | 8e-07            | C11orf45              | Hypomethylated in FP vs FN |
| cg10081994 | 0.332   | 0.633   | -0.301    | 8e-07            | NA                    | Hypomethylated in FP vs FN |
| cg06830044 | 0.214   | 0.575   | -0.361    | 8e-07            | NA                    | Hypomethylated in FP vs FN |
| cg16351246 | 0.302   | 0.710   | -0.408    | 8e-07            | NA                    | Hypomethylated in FP vs FN |
| cg11308396 | 0.447   | 0.702   | -0.255    | 8e-07            | NA                    | Hypomethylated in FP vs FN |
| cg04706087 | 0.620   | 0.879   | -0.260    | 8e-07            | NA                    | Hypomethylated in FP vs FN |
| cg01399598 | 0.426   | 0.787   | -0.360    | 8e-07            | NA                    | Hypomethylated in FP vs FN |
| cg07070113 | 0.437   | 0.715   | -0.278    | 8e-07            | C17orf55              | Hypomethylated in FP vs FN |
| cg01437209 | 0.628   | 0.881   | -0.253    | 8e-07            | NA                    | Hypomethylated in FP vs FN |
| cg06484432 | 0.407   | 0.732   | -0.325    | 8e-07            | NA                    | Hypomethylated in FP vs FN |
| cg13378400 | 0.354   | 0.660   | -0.306    | 8e-07            | NA                    | Hypomethylated in FP vs FN |
| cg22559013 | 0.324   | 0.678   | -0.354    | 8e-07            | MGC27382              | Hypomethylated in FP vs FN |
| cg18192294 | 0.097   | 0.556   | -0.458    | 8e-07            | RNLS                  | Hypomethylated in FP vs FN |
| cg11497924 | 0.357   | 0.712   | -0.354    | 8e-07            | MACROD2               | Hypomethylated in FP vs FN |
| cg07123022 | 0.339   | 0.644   | -0.305    | 8e-07            | NA                    | Hypomethylated in FP vs FN |
| cg11150191 | 0.386   | 0.691   | -0.304    | 8e-07            | NA                    | Hypomethylated in FP vs FN |
| cg10603296 | 0.524   | 0.826   | -0.301    | 8e-07            | MIR218-1              | Hypomethylated in FP vs FN |
| cg18686153 | 0.249   | 0.608   | -0.359    | 8e-07            | NA                    | Hypomethylated in FP vs FN |
| cg04898124 | 0.358   | 0.669   | -0.311    | 8e-07            | NA                    | Hypomethylated in FP vs FN |
| cg25560443 | 0.433   | 0.767   | -0.335    | 8e-07            | NA                    | Hypomethylated in FP vs FN |
| cg12879143 | 0.277   | 0.616   | -0.339    | 8e-07            | NA                    | Hypomethylated in FP vs FN |
| cg05923105 | 0.271   | 0.589   | -0.317    | 8e-07            | NA                    | Hypomethylated in FP vs FN |
| cg24890045 | 0.357   | 0.699   | -0.342    | 8e-07            | NA                    | Hypomethylated in FP vs FN |
| cg21537230 | 0.172   | 0.543   | -0.372    | 8e-07            | NA                    | Hypomethylated in FP vs FN |
| cg06502570 | 0.375   | 0.822   | -0.447    | 8e-07            | NA                    | Hypomethylated in FP vs FN |

### Supplementary Table 7 (continued)

| Probe      | FP.mean | FN.mean | Mean.diff | Adjusted.P.value | Promoter.related.gene | Category                   |
|------------|---------|---------|-----------|------------------|-----------------------|----------------------------|
| cg19313402 | 0.408   | 0.716   | -0.308    | 9e-07            | SLC30A10              | Hypomethylated in FP vs FN |
| cg17820306 | 0.288   | 0.638   | -0.350    | 9e-07            | NA                    | Hypomethylated in FP vs FN |
| cg00149708 | 0.429   | 0.774   | -0.344    | 9e-07            | SBK2                  | Hypomethylated in FP vs FN |
| cg24730915 | 0.318   | 0.653   | -0.335    | 9e-07            | NA                    | Hypomethylated in FP vs FN |
| cg23820560 | 0.460   | 0.755   | -0.296    | 9e-07            | MYO18B                | Hypomethylated in FP vs FN |
| cg00103448 | 0.355   | 0.721   | -0.367    | 9e-07            | NA                    | Hypomethylated in FP vs FN |
| cg25358289 | 0.228   | 0.551   | -0.323    | 9e-07            | CD14                  | Hypomethylated in FP vs FN |
| cg10115320 | 0.361   | 0.712   | -0.351    | 9e-07            | NA                    | Hypomethylated in FP vs FN |
| cg08875948 | 0.305   | 0.728   | -0.424    | 9e-07            | NA                    | Hypomethylated in FP vs FN |
| cg24030173 | 0.464   | 0.715   | -0.250    | 9e-07            | NA                    | Hypomethylated in FP vs FN |
| cg15613740 | 0.421   | 0.674   | -0.253    | 9e-07            | NA                    | Hypomethylated in FP vs FN |
| cg21841803 | 0.617   | 0.875   | -0.258    | 9e-07            | NA                    | Hypomethylated in FP vs FN |
| cg10152684 | 0.434   | 0.806   | -0.373    | 9e-07            | NA                    | Hypomethylated in FP vs FN |
| cg23303246 | 0.417   | 0.682   | -0.265    | 9e-07            | NA                    | Hypomethylated in FP vs FN |
| cg04597985 | 0.542   | 0.839   | -0.297    | 9e-07            | NA                    | Hypomethylated in FP vs FN |
| cg24058446 | 0.432   | 0.762   | -0.329    | 9e-07            | NA                    | Hypomethylated in FP vs FN |
| cg11044011 | 0.360   | 0.645   | -0.285    | 9e-07            | RGS12                 | Hypomethylated in FP vs FN |
| cg20108357 | 0.370   | 0.683   | -0.313    | 9e-07            | NA                    | Hypomethylated in FP vs FN |
| cg26794221 | 0.489   | 0.781   | -0.292    | 9e-07            | NA                    | Hypomethylated in FP vs FN |
| cg13761419 | 0.414   | 0.725   | -0.311    | 9e-07            | NA                    | Hypomethylated in FP vs FN |
| cg19663795 | 0.384   | 0.662   | -0.278    | 9e-07            | NA                    | Hypomethylated in FP vs FN |
| cg02829712 | 0.276   | 0.655   | -0.379    | 9e-07            | PCDHA10               | Hypomethylated in FP vs FN |
| cg05601096 | 0.620   | 0.883   | -0.263    | 9e-07            | GALC                  | Hypomethylated in FP vs FN |
| cg16270399 | 0.478   | 0.776   | -0.299    | 9e-07            | NA                    | Hypomethylated in FP vs FN |
| cg22631555 | 0.353   | 0.652   | -0.299    | 9e-07            | ARMC3                 | Hypomethylated in FP vs FN |

### Supplementary Table 7 (continued)

| Probe      | FP.mean | FN.mean | Mean.diff | Adjusted.P.value | Promoter.related.gene | Category                   |
|------------|---------|---------|-----------|------------------|-----------------------|----------------------------|
| cg07548607 | 0.101   | 0.595   | -0.494    | 9e-07            | ZSWIM2                | Hypomethylated in FP vs FN |
| cg19063061 | 0.145   | 0.584   | -0.440    | 9e-07            | NA                    | Hypomethylated in FP vs FN |
| cg02624836 | 0.316   | 0.588   | -0.272    | 9e-07            | NA                    | Hypomethylated in FP vs FN |
| cg21235075 | 0.435   | 0.705   | -0.270    | 9e-07            | NA                    | Hypomethylated in FP vs FN |
| cg20440891 | 0.516   | 0.784   | -0.268    | 9e-07            | NA                    | Hypomethylated in FP vs FN |
| cg05496768 | 0.628   | 0.886   | -0.258    | 9e-07            | NA                    | Hypomethylated in FP vs FN |
| cg06204229 | 0.328   | 0.633   | -0.305    | 9e-07            | ITIH4                 | Hypomethylated in FP vs FN |
| cg25968937 | 0.457   | 0.772   | -0.316    | 9e-07            | NA                    | Hypomethylated in FP vs FN |
| cg01075271 | 0.094   | 0.498   | -0.404    | 9e-07            | NA                    | Hypomethylated in FP vs FN |
| cg22676843 | 0.204   | 0.521   | -0.317    | 9e-07            | NA                    | Hypomethylated in FP vs FN |
| cg11865296 | 0.335   | 0.626   | -0.291    | 9e-07            | NA                    | Hypomethylated in FP vs FN |
| cg06154313 | 0.098   | 0.410   | -0.312    | 9e-07            | NA                    | Hypomethylated in FP vs FN |
| cg00460916 | 0.448   | 0.759   | -0.311    | 9e-07            | NA                    | Hypomethylated in FP vs FN |
| cg11653176 | 0.445   | 0.774   | -0.329    | 9e-07            | NA                    | Hypomethylated in FP vs FN |
| cg08625568 | 0.283   | 0.640   | -0.357    | 1e-06            | NA                    | Hypomethylated in FP vs FN |
| cg07963563 | 0.369   | 0.739   | -0.370    | 1e-06            | NA                    | Hypomethylated in FP vs FN |
| cg00028515 | 0.408   | 0.733   | -0.325    | 1e-06            | NA                    | Hypomethylated in FP vs FN |
| cg17385318 | 0.507   | 0.790   | -0.283    | 1e-06            | NA                    | Hypomethylated in FP vs FN |
| cg05001531 | 0.450   | 0.797   | -0.347    | 1e-06            | NA                    | Hypomethylated in FP vs FN |
| cg24768137 | 0.366   | 0.811   | -0.446    | 1e-06            | NA                    | Hypomethylated in FP vs FN |
| cg24426483 | 0.289   | 0.579   | -0.290    | 1e-06            | NA                    | Hypomethylated in FP vs FN |
| cg24818566 | 0.170   | 0.543   | -0.373    | 1e-06            | DBC1                  | Hypomethylated in FP vs FN |
| cg08525712 | 0.511   | 0.823   | -0.311    | 1e-06            | NA                    | Hypomethylated in FP vs FN |
| cg05245379 | 0.309   | 0.665   | -0.356    | 1e-06            | NA                    | Hypomethylated in FP vs FN |
| cg07684519 | 0.439   | 0.829   | -0.390    | 1e-06            | NA                    | Hypomethylated in FP vs FN |

### Supplementary Table 7 (continued)

| Probe      | FP.mean | FN.mean | Mean.diff | Adjusted.P.value | Promoter.related.gene | Category                   |
|------------|---------|---------|-----------|------------------|-----------------------|----------------------------|
| cg03101492 | 0.431   | 0.761   | -0.330    | 1e-06            | SPIC                  | Hypomethylated in FP vs FN |
| cg05827089 | 0.520   | 0.833   | -0.314    | 1e-06            | NA                    | Hypomethylated in FP vs FN |
| cg15090262 | 0.504   | 0.772   | -0.268    | 1e-06            | NA                    | Hypomethylated in FP vs FN |
| cg23405457 | 0.540   | 0.835   | -0.295    | 1e-06            | NA                    | Hypomethylated in FP vs FN |
| cg09926907 | 0.459   | 0.740   | -0.282    | 1e-06            | NA                    | Hypomethylated in FP vs FN |
| cg06045757 | 0.451   | 0.724   | -0.272    | 1e-06            | DSG1                  | Hypomethylated in FP vs FN |
| cg09858767 | 0.519   | 0.808   | -0.289    | 1e-06            | NA                    | Hypomethylated in FP vs FN |
| cg14511677 | 0.350   | 0.741   | -0.392    | 1e-06            | NA                    | Hypomethylated in FP vs FN |
| cg09636436 | 0.534   | 0.801   | -0.267    | 1e-06            | NA                    | Hypomethylated in FP vs FN |
| cg11165403 | 0.171   | 0.536   | -0.365    | 1e-06            | NA                    | Hypomethylated in FP vs FN |
| cg04284196 | 0.437   | 0.699   | -0.262    | 1e-06            | NA                    | Hypomethylated in FP vs FN |
| cg22315903 | 0.453   | 0.704   | -0.250    | 1e-06            | NA                    | Hypomethylated in FP vs FN |
| cg00093087 | 0.484   | 0.742   | -0.258    | 1e-06            | AQP2                  | Hypomethylated in FP vs FN |
| cg17722354 | 0.317   | 0.626   | -0.309    | 1e-06            | NA                    | Hypomethylated in FP vs FN |
| cg10137837 | 0.304   | 0.679   | -0.375    | 1e-06            | NA                    | Hypomethylated in FP vs FN |
| cg26370729 | 0.263   | 0.682   | -0.419    | 1e-06            | NA                    | Hypomethylated in FP vs FN |
| cg10799492 | 0.485   | 0.754   | -0.268    | 1e-06            | NA                    | Hypomethylated in FP vs FN |
| cg08355301 | 0.302   | 0.693   | -0.391    | 1e-06            | CD79B                 | Hypomethylated in FP vs FN |
| cg07777540 | 0.505   | 0.837   | -0.332    | 1e-06            | NA                    | Hypomethylated in FP vs FN |
| cg01668281 | 0.325   | 0.635   | -0.310    | 1e-06            | CLDN14                | Hypomethylated in FP vs FN |
| cg24478733 | 0.439   | 0.763   | -0.324    | 1e-06            | NA                    | Hypomethylated in FP vs FN |
| cg09551938 | 0.317   | 0.676   | -0.359    | 1e-06            | NA                    | Hypomethylated in FP vs FN |
| cg04876124 | 0.374   | 0.782   | -0.408    | 1e-06            | NA                    | Hypomethylated in FP vs FN |
| cg01700504 | 0.338   | 0.731   | -0.394    | 1e-06            | GJB6                  | Hypomethylated in FP vs FN |
| cg08765991 | 0.260   | 0.551   | -0.291    | 1e-06            | NPPC                  | Hypomethylated in FP vs FN |

### Supplementary Table 7 (continued)

| Probe      | FP.mean | FN.mean | Mean.diff | Adjusted.P.value | Promoter.related.gene | Category                   |
|------------|---------|---------|-----------|------------------|-----------------------|----------------------------|
| cg18894440 | 0.421   | 0.750   | -0.329    | 1e-06            | NA                    | Hypomethylated in FP vs FN |
| cg21540530 | 0.339   | 0.738   | -0.398    | 1e-06            | NA                    | Hypomethylated in FP vs FN |
| cg05250119 | 0.423   | 0.715   | -0.292    | 1e-06            | NA                    | Hypomethylated in FP vs FN |
| cg02656891 | 0.219   | 0.688   | -0.469    | 1e-06            | C1orf94               | Hypomethylated in FP vs FN |
| cg22140793 | 0.405   | 0.747   | -0.342    | 1e-06            | NA                    | Hypomethylated in FP vs FN |
| cg27401945 | 0.197   | 0.562   | -0.366    | 1e-06            | NA                    | Hypomethylated in FP vs FN |
| cg17668731 | 0.372   | 0.661   | -0.288    | 1e-06            | NA                    | Hypomethylated in FP vs FN |
| cg22780174 | 0.451   | 0.722   | -0.271    | 1e-06            | NA                    | Hypomethylated in FP vs FN |
| cg03835709 | 0.610   | 0.868   | -0.258    | 1e-06            | NA                    | Hypomethylated in FP vs FN |
| cg13787356 | 0.532   | 0.843   | -0.312    | 1e-06            | NA                    | Hypomethylated in FP vs FN |
| cg04577249 | 0.331   | 0.625   | -0.295    | 1e-06            | NA                    | Hypomethylated in FP vs FN |
| cg19090861 | 0.211   | 0.501   | -0.290    | 1e-06            | CD248                 | Hypomethylated in FP vs FN |
| cg06847670 | 0.549   | 0.827   | -0.279    | 1e-06            | NA                    | Hypomethylated in FP vs FN |
| cg13544333 | 0.265   | 0.598   | -0.333    | 1e-06            | NA                    | Hypomethylated in FP vs FN |
| cg18333041 | 0.401   | 0.741   | -0.339    | 1e-06            | NA                    | Hypomethylated in FP vs FN |
| cg18807011 | 0.142   | 0.502   | -0.360    | 1e-06            | NA                    | Hypomethylated in FP vs FN |
| cg12866104 | 0.479   | 0.780   | -0.301    | 1e-06            | NA                    | Hypomethylated in FP vs FN |
| cg11666982 | 0.523   | 0.794   | -0.272    | 1e-06            | NA                    | Hypomethylated in FP vs FN |
| cg01454538 | 0.291   | 0.636   | -0.345    | 1e-06            | NA                    | Hypomethylated in FP vs FN |
| cg20910746 | 0.614   | 0.864   | -0.250    | 1e-06            | BBOX1                 | Hypomethylated in FP vs FN |
| cg16556696 | 0.501   | 0.801   | -0.300    | 1e-06            | NA                    | Hypomethylated in FP vs FN |
| cg11113066 | 0.387   | 0.772   | -0.385    | 1e-06            | NA                    | Hypomethylated in FP vs FN |
| cg11143092 | 0.293   | 0.670   | -0.377    | 1e-06            | NA                    | Hypomethylated in FP vs FN |
| cg21624902 | 0.277   | 0.640   | -0.363    | 1e-06            | NA                    | Hypomethylated in FP vs FN |
| cg13065735 | 0.472   | 0.774   | -0.302    | 1e-06            | NA                    | Hypomethylated in FP vs FN |

### Supplementary Table 7 (continued)

| Probe      | FP.mean | FN.mean | Mean.diff | Adjusted.P.value | Promoter.related.gene | Category                   |
|------------|---------|---------|-----------|------------------|-----------------------|----------------------------|
| cg08441269 | 0.486   | 0.774   | -0.288    | 1e-06            | NA                    | Hypomethylated in FP vs FN |
| cg04656009 | 0.412   | 0.726   | -0.314    | 1e-06            | CCL8                  | Hypomethylated in FP vs FN |
| cg14178294 | 0.484   | 0.793   | -0.309    | 1e-06            | NA                    | Hypomethylated in FP vs FN |
| cg22340762 | 0.483   | 0.805   | -0.322    | 1e-06            | NA                    | Hypomethylated in FP vs FN |
| cg06642503 | 0.426   | 0.720   | -0.295    | 1e-06            | LOC100128675          | Hypomethylated in FP vs FN |
| cg04645545 | 0.222   | 0.684   | -0.462    | 1e-06            | NA                    | Hypomethylated in FP vs FN |
| cg11383474 | 0.444   | 0.726   | -0.281    | 1e-06            | NA                    | Hypomethylated in FP vs FN |
| cg14748795 | 0.242   | 0.637   | -0.396    | 1e-06            | NA                    | Hypomethylated in FP vs FN |
| cg21230565 | 0.432   | 0.718   | -0.287    | 1e-06            | NA                    | Hypomethylated in FP vs FN |
| cg06477663 | 0.284   | 0.648   | -0.364    | 1e-06            | LCP1                  | Hypomethylated in FP vs FN |
| cg18850300 | 0.514   | 0.804   | -0.289    | 1e-06            | NA                    | Hypomethylated in FP vs FN |
| cg15058894 | 0.378   | 0.760   | -0.382    | 1e-06            | SWAP70                | Hypomethylated in FP vs FN |
| cg22377389 | 0.178   | 0.552   | -0.374    | 1e-06            | GJB6                  | Hypomethylated in FP vs FN |
| cg22540431 | 0.488   | 0.785   | -0.297    | 1e-06            | NA                    | Hypomethylated in FP vs FN |
| cg17998283 | 0.391   | 0.649   | -0.257    | 1e-06            | NA                    | Hypomethylated in FP vs FN |
| cg26365147 | 0.388   | 0.719   | -0.330    | 1e-06            | NA                    | Hypomethylated in FP vs FN |
| cg12741436 | 0.389   | 0.674   | -0.285    | 1e-06            | NA                    | Hypomethylated in FP vs FN |
| cg18835416 | 0.131   | 0.532   | -0.401    | 1e-06            | TLX2                  | Hypomethylated in FP vs FN |
| cg21122370 | 0.261   | 0.613   | -0.352    | 1e-06            | SLIT3                 | Hypomethylated in FP vs FN |
| cg14617020 | 0.463   | 0.753   | -0.290    | 1e-06            | NA                    | Hypomethylated in FP vs FN |
| cg07799386 | 0.217   | 0.574   | -0.357    | 1e-06            | NA                    | Hypomethylated in FP vs FN |
| cg26960083 | 0.339   | 0.746   | -0.407    | 1e-06            | EPHA1                 | Hypomethylated in FP vs FN |
| cg16326242 | 0.284   | 0.577   | -0.293    | 1e-06            | NA                    | Hypomethylated in FP vs FN |
| cg09886931 | 0.596   | 0.858   | -0.262    | 1e-06            | NA                    | Hypomethylated in FP vs FN |
| cg05661164 | 0.538   | 0.838   | -0.300    | 1e-06            | KRT83                 | Hypomethylated in FP vs FN |

### Supplementary Table 7 (continued)

| Probe      | FP.mean | FN.mean | Mean.diff | Adjusted.P.value | Promoter.related.gene | Category                   |
|------------|---------|---------|-----------|------------------|-----------------------|----------------------------|
| cg11376339 | 0.188   | 0.507   | -0.319    | 1e-06            | NA                    | Hypomethylated in FP vs FN |
| cg23339454 | 0.232   | 0.597   | -0.364    | 1e-06            | NA                    | Hypomethylated in FP vs FN |
| cg16668896 | 0.388   | 0.660   | -0.273    | 1e-06            | NA                    | Hypomethylated in FP vs FN |
| cg17170262 | 0.392   | 0.679   | -0.287    | 1e-06            | NA                    | Hypomethylated in FP vs FN |
| cg25364726 | 0.518   | 0.815   | -0.297    | 1e-06            | C10orf71              | Hypomethylated in FP vs FN |
| cg17493253 | 0.412   | 0.753   | -0.341    | 1e-06            | NA                    | Hypomethylated in FP vs FN |
| cg13426632 | 0.515   | 0.780   | -0.264    | 1e-06            | NA                    | Hypomethylated in FP vs FN |
| cg12033187 | 0.434   | 0.737   | -0.303    | 1e-06            | NA                    | Hypomethylated in FP vs FN |
| cg05697695 | 0.311   | 0.672   | -0.361    | 1e-06            | NA                    | Hypomethylated in FP vs FN |
| cg22461018 | 0.389   | 0.720   | -0.331    | 1e-06            | MORF4                 | Hypomethylated in FP vs FN |
| cg01211065 | 0.275   | 0.650   | -0.376    | 1e-06            | NA                    | Hypomethylated in FP vs FN |
| cg04788769 | 0.374   | 0.748   | -0.375    | 1e-06            | NA                    | Hypomethylated in FP vs FN |
| cg23715029 | 0.388   | 0.693   | -0.305    | 1e-06            | TRAK1                 | Hypomethylated in FP vs FN |
| cg14701643 | 0.228   | 0.646   | -0.418    | 1e-06            | NA                    | Hypomethylated in FP vs FN |
| cg06091881 | 0.132   | 0.586   | -0.455    | 1e-06            | NA                    | Hypomethylated in FP vs FN |
| cg22622123 | 0.411   | 0.727   | -0.315    | 1e-06            | SLC37A4               | Hypomethylated in FP vs FN |
| cg11186850 | 0.502   | 0.837   | -0.335    | 1e-06            | ADAM2                 | Hypomethylated in FP vs FN |
| cg17732877 | 0.361   | 0.709   | -0.348    | 1e-06            | NA                    | Hypomethylated in FP vs FN |
| cg26485771 | 0.616   | 0.886   | -0.270    | 1e-06            | NA                    | Hypomethylated in FP vs FN |
| cg27576434 | 0.595   | 0.848   | -0.253    | 1e-06            | NA                    | Hypomethylated in FP vs FN |
| cg24076884 | 0.428   | 0.754   | -0.326    | 1e-06            | PCDHAC2               | Hypomethylated in FP vs FN |
| cg14738348 | 0.465   | 0.737   | -0.272    | 1e-06            | NA                    | Hypomethylated in FP vs FN |
| cg22387578 | 0.142   | 0.551   | -0.409    | 1e-06            | NA                    | Hypomethylated in FP vs FN |
| cg16642360 | 0.463   | 0.736   | -0.274    | 1e-06            | NA                    | Hypomethylated in FP vs FN |
| cg27208052 | 0.174   | 0.556   | -0.383    | 1e-06            | MMP15                 | Hypomethylated in FP vs FN |



### Supplementary Table 7 (continued)

| Probe      | FP.mean | FN.mean | Mean.diff | Adjusted.P.value | Promoter.related.gene | Category                   |
|------------|---------|---------|-----------|------------------|-----------------------|----------------------------|
| cg15353533 | 0.574   | 0.826   | -0.252    | 1e-06            | NA                    | Hypomethylated in FP vs FN |
| cg27504195 | 0.325   | 0.738   | -0.413    | 1e-06            | NA                    | Hypomethylated in FP vs FN |
| cg08614334 | 0.450   | 0.702   | -0.252    | 1e-06            | NA                    | Hypomethylated in FP vs FN |
| cg12174804 | 0.274   | 0.723   | -0.448    | 1e-06            | NA                    | Hypomethylated in FP vs FN |
| cg23254569 | 0.396   | 0.660   | -0.264    | 1e-06            | NA                    | Hypomethylated in FP vs FN |
| cg16500230 | 0.462   | 0.729   | -0.268    | 1e-06            | NA                    | Hypomethylated in FP vs FN |
| cg03358769 | 0.117   | 0.553   | -0.435    | 1e-06            | C3orf55               | Hypomethylated in FP vs FN |
| cg01351300 | 0.536   | 0.814   | -0.278    | 1e-06            | NA                    | Hypomethylated in FP vs FN |
| cg13336485 | 0.417   | 0.743   | -0.326    | 1e-06            | NA                    | Hypomethylated in FP vs FN |
| cg24466873 | 0.144   | 0.586   | -0.441    | 1e-06            | NA                    | Hypomethylated in FP vs FN |
| cg12426652 | 0.212   | 0.637   | -0.425    | 1e-06            | CLDN14                | Hypomethylated in FP vs FN |
| cg06147210 | 0.483   | 0.826   | -0.343    | 1e-06            | NA                    | Hypomethylated in FP vs FN |
| cg18219522 | 0.489   | 0.757   | -0.268    | 1e-06            | NA                    | Hypomethylated in FP vs FN |
| cg11494699 | 0.535   | 0.812   | -0.278    | 1e-06            | RAG1                  | Hypomethylated in FP vs FN |
| cg11786623 | 0.354   | 0.626   | -0.272    | 1e-06            | NA                    | Hypomethylated in FP vs FN |
| cg06506523 | 0.338   | 0.687   | -0.349    | 1e-06            | NA                    | Hypomethylated in FP vs FN |
| cg06713076 | 0.455   | 0.775   | -0.319    | 1e-06            | NA                    | Hypomethylated in FP vs FN |
| cg22984769 | 0.142   | 0.495   | -0.353    | 1e-06            | NA                    | Hypomethylated in FP vs FN |
| cg11020821 | 0.535   | 0.786   | -0.251    | 1e-06            | NA                    | Hypomethylated in FP vs FN |
| cg23873200 | 0.375   | 0.648   | -0.272    | 1e-06            | NA                    | Hypomethylated in FP vs FN |
| cg19949955 | 0.172   | 0.613   | -0.441    | 1e-06            | NA                    | Hypomethylated in FP vs FN |
| cg12658495 | 0.495   | 0.794   | -0.300    | 1e-06            | NA                    | Hypomethylated in FP vs FN |
| cg16761390 | 0.179   | 0.542   | -0.363    | 1e-06            | NA                    | Hypomethylated in FP vs FN |
| cg13502474 | 0.401   | 0.713   | -0.312    | 1e-06            | NA                    | Hypomethylated in FP vs FN |
| cg20777398 | 0.407   | 0.773   | -0.366    | 1e-06            | NA                    | Hypomethylated in FP vs FN |

### Supplementary Table 7 (continued)

| Probe      | FP.mean | FN.mean | Mean.diff | Adjusted.P.value | Promoter.related.gene | Category                   |
|------------|---------|---------|-----------|------------------|-----------------------|----------------------------|
| cg16661628 | 0.208   | 0.636   | -0.428    | 1e-06            | NA                    | Hypomethylated in FP vs FN |
| cg24164238 | 0.382   | 0.674   | -0.293    | 1e-06            | NA                    | Hypomethylated in FP vs FN |
| cg01209642 | 0.451   | 0.716   | -0.264    | 1e-06            | NA                    | Hypomethylated in FP vs FN |
| cg26965236 | 0.437   | 0.781   | -0.344    | 1e-06            | NA                    | Hypomethylated in FP vs FN |
| cg09109553 | 0.487   | 0.795   | -0.308    | 1e-06            | NA                    | Hypomethylated in FP vs FN |
| cg24683185 | 0.333   | 0.695   | -0.362    | 1e-06            | NA                    | Hypomethylated in FP vs FN |
| cg12486169 | 0.257   | 0.637   | -0.379    | 1e-06            | NA                    | Hypomethylated in FP vs FN |
| cg10784511 | 0.418   | 0.785   | -0.366    | 1e-06            | NA                    | Hypomethylated in FP vs FN |
| cg01868405 | 0.150   | 0.599   | -0.449    | 1e-06            | NA                    | Hypomethylated in FP vs FN |
| cg01797899 | 0.544   | 0.799   | -0.255    | 1e-06            | NA                    | Hypomethylated in FP vs FN |
| cg26568031 | 0.516   | 0.803   | -0.287    | 1e-06            | NA                    | Hypomethylated in FP vs FN |
| cg16160105 | 0.382   | 0.652   | -0.270    | 1e-06            | KRT83                 | Hypomethylated in FP vs FN |
| cg10050410 | 0.494   | 0.784   | -0.291    | 1e-06            | NA                    | Hypomethylated in FP vs FN |
| cg09486967 | 0.407   | 0.745   | -0.337    | 1e-06            | NA                    | Hypomethylated in FP vs FN |
| cg08763626 | 0.258   | 0.512   | -0.255    | 1e-06            | KCNAB1                | Hypomethylated in FP vs FN |
| cg05222924 | 0.144   | 0.593   | -0.450    | 1e-06            | NA                    | Hypomethylated in FP vs FN |
| cg23889610 | 0.534   | 0.834   | -0.300    | 1e-06            | NA                    | Hypomethylated in FP vs FN |
| cg13799941 | 0.322   | 0.608   | -0.286    | 1e-06            | NA                    | Hypomethylated in FP vs FN |
| cg14877896 | 0.309   | 0.672   | -0.363    | 1e-06            | NA                    | Hypomethylated in FP vs FN |
| cg16174106 | 0.478   | 0.744   | -0.266    | 1e-06            | NA                    | Hypomethylated in FP vs FN |
| cg01423695 | 0.382   | 0.708   | -0.326    | 1e-06            | NA                    | Hypomethylated in FP vs FN |
| cg22670147 | 0.175   | 0.523   | -0.347    | 1e-06            | NA                    | Hypomethylated in FP vs FN |
| cg07153724 | 0.286   | 0.620   | -0.334    | 1e-06            | NA                    | Hypomethylated in FP vs FN |
| cg09597806 | 0.311   | 0.682   | -0.371    | 1e-06            | NA                    | Hypomethylated in FP vs FN |
| cg05785932 | 0.514   | 0.767   | -0.253    | 1e-06            | NA                    | Hypomethylated in FP vs FN |

### Supplementary Table 7 (continued)

| Probe      | FP.mean | FN.mean | Mean.diff | Adjusted.P.value | Promoter.related.gene | Category                   |
|------------|---------|---------|-----------|------------------|-----------------------|----------------------------|
| cg13730618 | 0.435   | 0.714   | -0.279    | 1e-06            | NA                    | Hypomethylated in FP vs FN |
| cg12401640 | 0.331   | 0.682   | -0.351    | 1e-06            | NA                    | Hypomethylated in FP vs FN |
| cg25948180 | 0.382   | 0.696   | -0.314    | 1e-06            | PDHX                  | Hypomethylated in FP vs FN |
| cg03834055 | 0.484   | 0.743   | -0.259    | 1e-06            | NA                    | Hypomethylated in FP vs FN |
| cg21029769 | 0.244   | 0.696   | -0.452    | 1e-06            | ST14                  | Hypomethylated in FP vs FN |
| cg10624395 | 0.461   | 0.775   | -0.314    | 1e-06            | NA                    | Hypomethylated in FP vs FN |
| cg24649332 | 0.211   | 0.508   | -0.297    | 1e-06            | SLC13A3               | Hypomethylated in FP vs FN |
| cg18933620 | 0.426   | 0.749   | -0.323    | 1e-06            | NA                    | Hypomethylated in FP vs FN |
| cg12508392 | 0.302   | 0.648   | -0.345    | 1e-06            | NA                    | Hypomethylated in FP vs FN |
| cg15888693 | 0.350   | 0.701   | -0.352    | 1e-06            | NA                    | Hypomethylated in FP vs FN |
| cg05973555 | 0.350   | 0.749   | -0.399    | 1e-06            | NA                    | Hypomethylated in FP vs FN |
| cg02719608 | 0.255   | 0.620   | -0.365    | 1e-06            | NA                    | Hypomethylated in FP vs FN |
| cg02864638 | 0.407   | 0.710   | -0.303    | 1e-06            | NA                    | Hypomethylated in FP vs FN |
| cg18400889 | 0.615   | 0.889   | -0.274    | 1e-06            | NA                    | Hypomethylated in FP vs FN |
| cg10601476 | 0.385   | 0.768   | -0.382    | 1e-06            | NA                    | Hypomethylated in FP vs FN |
| cg12041387 | 0.166   | 0.563   | -0.397    | 1e-06            | NA                    | Hypomethylated in FP vs FN |
| cg16578085 | 0.316   | 0.658   | -0.342    | 1e-06            | NA                    | Hypomethylated in FP vs FN |
| cg22082800 | 0.292   | 0.670   | -0.377    | 1e-06            | NA                    | Hypomethylated in FP vs FN |
| cg03522132 | 0.181   | 0.583   | -0.403    | 1e-06            | NA                    | Hypomethylated in FP vs FN |
| cg24822552 | 0.492   | 0.792   | -0.300    | 1e-06            | NA                    | Hypomethylated in FP vs FN |
| cg11741115 | 0.566   | 0.829   | -0.263    | 1e-06            | TNN                   | Hypomethylated in FP vs FN |
| cg02828779 | 0.540   | 0.796   | -0.256    | 1e-06            | ACTRT2                | Hypomethylated in FP vs FN |
| cg11006962 | 0.211   | 0.598   | -0.387    | 1e-06            | NA                    | Hypomethylated in FP vs FN |
| cg06197731 | 0.594   | 0.848   | -0.254    | 1e-06            | NA                    | Hypomethylated in FP vs FN |
| cg05349039 | 0.402   | 0.698   | -0.297    | 1e-06            | NCRNA00175            | Hypomethylated in FP vs FN |

### Supplementary Table 7 (continued)

| Probe      | FP.mean | FN.mean | Mean.diff | Adjusted.P.value | Promoter.related.gene | Category                   |
|------------|---------|---------|-----------|------------------|-----------------------|----------------------------|
| cg10726725 | 0.597   | 0.862   | -0.265    | 1e-06            | NA                    | Hypomethylated in FP vs FN |
| cg27644327 | 0.500   | 0.775   | -0.274    | 1e-06            | NA                    | Hypomethylated in FP vs FN |
| cg22037648 | 0.261   | 0.697   | -0.436    | 1e-06            | NA                    | Hypomethylated in FP vs FN |
| cg01753176 | 0.408   | 0.690   | -0.282    | 1e-06            | NA                    | Hypomethylated in FP vs FN |
| cg04774496 | 0.098   | 0.535   | -0.437    | 1e-06            | CHFR                  | Hypomethylated in FP vs FN |
| cg25506413 | 0.141   | 0.533   | -0.392    | 1e-06            | NA                    | Hypomethylated in FP vs FN |
| cg15943603 | 0.373   | 0.716   | -0.343    | 1e-06            | NA                    | Hypomethylated in FP vs FN |
| cg26104384 | 0.321   | 0.601   | -0.281    | 1e-06            | NA                    | Hypomethylated in FP vs FN |
| cg07872947 | 0.393   | 0.723   | -0.329    | 1e-06            | NA                    | Hypomethylated in FP vs FN |
| cg23391090 | 0.297   | 0.659   | -0.362    | 1e-06            | NA                    | Hypomethylated in FP vs FN |
| cg01558403 | 0.309   | 0.606   | -0.297    | 1e-06            | NA                    | Hypomethylated in FP vs FN |
| cg03165356 | 0.319   | 0.621   | -0.303    | 1e-06            | NA                    | Hypomethylated in FP vs FN |
| cg10992219 | 0.494   | 0.770   | -0.275    | 1e-06            | NA                    | Hypomethylated in FP vs FN |
| cg13716619 | 0.482   | 0.787   | -0.306    | 1e-06            | NA                    | Hypomethylated in FP vs FN |
| cg09241368 | 0.565   | 0.870   | -0.305    | 1e-06            | NA                    | Hypomethylated in FP vs FN |
| cg26767389 | 0.439   | 0.757   | -0.318    | 1e-06            | NA                    | Hypomethylated in FP vs FN |
| cg12445309 | 0.347   | 0.694   | -0.347    | 1e-06            | NA                    | Hypomethylated in FP vs FN |
| cg00686404 | 0.409   | 0.737   | -0.328    | 1e-06            | LCTL                  | Hypomethylated in FP vs FN |
| cg14744463 | 0.442   | 0.718   | -0.276    | 1e-06            | NA                    | Hypomethylated in FP vs FN |
| cg09622715 | 0.421   | 0.696   | -0.274    | 1e-06            | NA                    | Hypomethylated in FP vs FN |
| cg19268976 | 0.378   | 0.693   | -0.315    | 1e-06            | NA                    | Hypomethylated in FP vs FN |
| cg01734062 | 0.371   | 0.726   | -0.355    | 1e-06            | TMEM92                | Hypomethylated in FP vs FN |
| cg11738921 | 0.505   | 0.756   | -0.250    | 1e-06            | NA                    | Hypomethylated in FP vs FN |
| cg22504175 | 0.179   | 0.564   | -0.385    | 1e-06            | NA                    | Hypomethylated in FP vs FN |
| cg04003772 | 0.470   | 0.762   | -0.292    | 1e-06            | NA                    | Hypomethylated in FP vs FN |

### Supplementary Table 7 (continued)

| Probe      | FP.mean | FN.mean | Mean.diff | Adjusted.P.value | Promoter.related.gene | Category                   |
|------------|---------|---------|-----------|------------------|-----------------------|----------------------------|
| cg17173896 | 0.361   | 0.668   | -0.307    | 1e-06            | NA                    | Hypomethylated in FP vs FN |
| cg20294328 | 0.558   | 0.847   | -0.289    | 1e-06            | NA                    | Hypomethylated in FP vs FN |
| cg16566595 | 0.579   | 0.864   | -0.285    | 1e-06            | WBP11P1               | Hypomethylated in FP vs FN |
| cg20084577 | 0.341   | 0.656   | -0.314    | 1e-06            | STARD13               | Hypomethylated in FP vs FN |
| cg23067881 | 0.289   | 0.614   | -0.325    | 1e-06            | NA                    | Hypomethylated in FP vs FN |
| cg02729303 | 0.336   | 0.640   | -0.304    | 1e-06            | FAM134B               | Hypomethylated in FP vs FN |
| cg07878085 | 0.411   | 0.725   | -0.313    | 1e-06            | NA                    | Hypomethylated in FP vs FN |
| cg14923398 | 0.246   | 0.679   | -0.432    | 1e-06            | NA                    | Hypomethylated in FP vs FN |
| cg10504885 | 0.303   | 0.664   | -0.361    | 2e-06            | NA                    | Hypomethylated in FP vs FN |
| cg21243631 | 0.304   | 0.554   | -0.250    | 2e-06            | NA                    | Hypomethylated in FP vs FN |
| cg19243826 | 0.318   | 0.670   | -0.352    | 2e-06            | NA                    | Hypomethylated in FP vs FN |
| cg11712188 | 0.455   | 0.769   | -0.314    | 2e-06            | NA                    | Hypomethylated in FP vs FN |
| cg05588341 | 0.388   | 0.698   | -0.310    | 2e-06            | NA                    | Hypomethylated in FP vs FN |
| cg21881253 | 0.112   | 0.594   | -0.482    | 2e-06            | MIR34B_BTG4_MIR34C    | Hypomethylated in FP vs FN |
| cg24217704 | 0.152   | 0.629   | -0.477    | 2e-06            | GALNT3                | Hypomethylated in FP vs FN |
| cg16445268 | 0.387   | 0.670   | -0.283    | 2e-06            | NA                    | Hypomethylated in FP vs FN |
| cg05837727 | 0.128   | 0.430   | -0.302    | 2e-06            | NA                    | Hypomethylated in FP vs FN |
| cg25016420 | 0.384   | 0.677   | -0.293    | 2e-06            | SPTLC3                | Hypomethylated in FP vs FN |
| cg26410484 | 0.162   | 0.552   | -0.390    | 2e-06            | CHFR                  | Hypomethylated in FP vs FN |
| cg09857513 | 0.322   | 0.680   | -0.358    | 2e-06            | WNT16                 | Hypomethylated in FP vs FN |
| cg07631681 | 0.419   | 0.694   | -0.275    | 2e-06            | NA                    | Hypomethylated in FP vs FN |
| cg00101629 | 0.467   | 0.776   | -0.309    | 2e-06            | NA                    | Hypomethylated in FP vs FN |
| cg18373354 | 0.155   | 0.645   | -0.491    | 2e-06            | ST14                  | Hypomethylated in FP vs FN |
| cg06122230 | 0.588   | 0.863   | -0.275    | 2e-06            | NA                    | Hypomethylated in FP vs FN |
| cg18809074 | 0.466   | 0.734   | -0.268    | 2e-06            | NA                    | Hypomethylated in FP vs FN |

### Supplementary Table 7 (continued)

| Probe      | FP.mean | FN.mean | Mean.diff | Adjusted.P.value | Promoter.related.gene | Category                   |
|------------|---------|---------|-----------|------------------|-----------------------|----------------------------|
| cg26275986 | 0.438   | 0.738   | -0.300    | 2e-06            | NA                    | Hypomethylated in FP vs FN |
| cg26074025 | 0.166   | 0.444   | -0.278    | 2e-06            | NA                    | Hypomethylated in FP vs FN |
| cg10131095 | 0.139   | 0.472   | -0.333    | 2e-06            | RNLS                  | Hypomethylated in FP vs FN |
| cg09997271 | 0.161   | 0.473   | -0.312    | 2e-06            | PDE4A                 | Hypomethylated in FP vs FN |
| cg04586579 | 0.139   | 0.422   | -0.283    | 2e-06            | NA                    | Hypomethylated in FP vs FN |
| cg13827582 | 0.554   | 0.825   | -0.271    | 2e-06            | NA                    | Hypomethylated in FP vs FN |
| cg05349062 | 0.118   | 0.557   | -0.439    | 2e-06            | TLX2                  | Hypomethylated in FP vs FN |
| cg16871994 | 0.131   | 0.429   | -0.298    | 2e-06            | NA                    | Hypomethylated in FP vs FN |
| cg08827429 | 0.484   | 0.819   | -0.335    | 2e-06            | NA                    | Hypomethylated in FP vs FN |
| cg06083483 | 0.195   | 0.527   | -0.331    | 2e-06            | CCL8                  | Hypomethylated in FP vs FN |
| cg23465427 | 0.231   | 0.535   | -0.304    | 2e-06            | NA                    | Hypomethylated in FP vs FN |
| cg25349643 | 0.400   | 0.768   | -0.368    | 2e-06            | MIR181B1              | Hypomethylated in FP vs FN |
| cg17234201 | 0.324   | 0.646   | -0.321    | 2e-06            | NA                    | Hypomethylated in FP vs FN |
| cg20643029 | 0.263   | 0.663   | -0.400    | 2e-06            | CLDN14                | Hypomethylated in FP vs FN |
| cg09955705 | 0.282   | 0.558   | -0.276    | 2e-06            | NA                    | Hypomethylated in FP vs FN |
| cg16873414 | 0.371   | 0.673   | -0.302    | 2e-06            | PARVG                 | Hypomethylated in FP vs FN |
| cg00633062 | 0.442   | 0.719   | -0.277    | 2e-06            | LOC100127888          | Hypomethylated in FP vs FN |
| cg13634423 | 0.412   | 0.764   | -0.351    | 2e-06            | NA                    | Hypomethylated in FP vs FN |
| cg05473536 | 0.385   | 0.753   | -0.368    | 2e-06            | NA                    | Hypomethylated in FP vs FN |
| cg11974346 | 0.490   | 0.748   | -0.258    | 2e-06            | NA                    | Hypomethylated in FP vs FN |
| cg25268863 | 0.328   | 0.653   | -0.324    | 2e-06            | NA                    | Hypomethylated in FP vs FN |
| cg13771219 | 0.483   | 0.817   | -0.334    | 2e-06            | NTN5                  | Hypomethylated in FP vs FN |
| cg00470794 | 0.075   | 0.473   | -0.398    | 2e-06            | CHFR                  | Hypomethylated in FP vs FN |
| cg06647928 | 0.289   | 0.582   | -0.293    | 2e-06            | NA                    | Hypomethylated in FP vs FN |
| cg26280695 | 0.475   | 0.745   | -0.270    | 2e-06            | NA                    | Hypomethylated in FP vs FN |

### Supplementary Table 7 (continued)

| Probe      | FP.mean | FN.mean | Mean.diff | Adjusted.P.value | Promoter.related.gene | Category                   |
|------------|---------|---------|-----------|------------------|-----------------------|----------------------------|
| cg22085751 | 0.321   | 0.645   | -0.324    | 2e-06            | NA                    | Hypomethylated in FP vs FN |
| cg13897914 | 0.370   | 0.680   | -0.310    | 2e-06            | NDUFAF1               | Hypomethylated in FP vs FN |
| cg07391690 | 0.436   | 0.748   | -0.312    | 2e-06            | NA                    | Hypomethylated in FP vs FN |
| cg11292836 | 0.282   | 0.596   | -0.314    | 2e-06            | NA                    | Hypomethylated in FP vs FN |
| cg19458233 | 0.529   | 0.814   | -0.285    | 2e-06            | NA                    | Hypomethylated in FP vs FN |
| cg06346335 | 0.441   | 0.726   | -0.285    | 2e-06            | NA                    | Hypomethylated in FP vs FN |
| cg24770408 | 0.485   | 0.736   | -0.252    | 2e-06            | NA                    | Hypomethylated in FP vs FN |
| cg08694107 | 0.588   | 0.843   | -0.256    | 2e-06            | NA                    | Hypomethylated in FP vs FN |
| cg17105755 | 0.527   | 0.807   | -0.280    | 2e-06            | C2orf65               | Hypomethylated in FP vs FN |
| cg10835711 | 0.483   | 0.782   | -0.299    | 2e-06            | NA                    | Hypomethylated in FP vs FN |
| cg03388786 | 0.234   | 0.593   | -0.359    | 2e-06            | NA                    | Hypomethylated in FP vs FN |
| cg05951084 | 0.223   | 0.620   | -0.397    | 2e-06            | NA                    | Hypomethylated in FP vs FN |
| cg07477602 | 0.524   | 0.801   | -0.277    | 2e-06            | NA                    | Hypomethylated in FP vs FN |
| cg21580421 | 0.518   | 0.826   | -0.307    | 2e-06            | CCDC80                | Hypomethylated in FP vs FN |
| cg12193833 | 0.301   | 0.755   | -0.454    | 2e-06            | NA                    | Hypomethylated in FP vs FN |
| cg11887833 | 0.317   | 0.664   | -0.347    | 2e-06            | MYH3                  | Hypomethylated in FP vs FN |
| cg21221545 | 0.622   | 0.885   | -0.263    | 2e-06            | NA                    | Hypomethylated in FP vs FN |
| cg04229820 | 0.532   | 0.792   | -0.261    | 2e-06            | RGS13                 | Hypomethylated in FP vs FN |
| cg07114009 | 0.403   | 0.737   | -0.335    | 2e-06            | ZNF750                | Hypomethylated in FP vs FN |
| cg04153551 | 0.403   | 0.761   | -0.358    | 2e-06            | NA                    | Hypomethylated in FP vs FN |
| cg12808664 | 0.500   | 0.759   | -0.259    | 2e-06            | NA                    | Hypomethylated in FP vs FN |
| cg14897298 | 0.406   | 0.724   | -0.318    | 2e-06            | NA                    | Hypomethylated in FP vs FN |
| cg02570354 | 0.514   | 0.801   | -0.286    | 2e-06            | NA                    | Hypomethylated in FP vs FN |
| cg17367596 | 0.575   | 0.833   | -0.258    | 2e-06            | DKFZp761E198          | Hypomethylated in FP vs FN |
| cg10089081 | 0.361   | 0.744   | -0.383    | 2e-06            | NA                    | Hypomethylated in FP vs FN |

### Supplementary Table 7 (continued)

| Probe      | FP.mean | FN.mean | Mean.diff | Adjusted.P.value | Promoter.related.gene | Category                   |
|------------|---------|---------|-----------|------------------|-----------------------|----------------------------|
| cg14551881 | 0.316   | 0.585   | -0.268    | 2e-06            | NA                    | Hypomethylated in FP vs FN |
| cg19621338 | 0.505   | 0.815   | -0.311    | 2e-06            | NA                    | Hypomethylated in FP vs FN |
| cg14413904 | 0.439   | 0.775   | -0.335    | 2e-06            | NA                    | Hypomethylated in FP vs FN |
| cg09899041 | 0.484   | 0.753   | -0.269    | 2e-06            | NA                    | Hypomethylated in FP vs FN |
| cg14182890 | 0.330   | 0.630   | -0.300    | 2e-06            | NA                    | Hypomethylated in FP vs FN |
| cg27160524 | 0.290   | 0.572   | -0.282    | 2e-06            | NA                    | Hypomethylated in FP vs FN |
| cg21280510 | 0.277   | 0.660   | -0.382    | 2e-06            | NA                    | Hypomethylated in FP vs FN |
| cg19373545 | 0.523   | 0.793   | -0.270    | 2e-06            | C1orf113              | Hypomethylated in FP vs FN |
| cg03727754 | 0.494   | 0.808   | -0.314    | 2e-06            | NA                    | Hypomethylated in FP vs FN |
| cg00942293 | 0.309   | 0.632   | -0.323    | 2e-06            | E2F4_EXOC3L           | Hypomethylated in FP vs FN |
| cg12086464 | 0.249   | 0.525   | -0.276    | 2e-06            | SH3BP2                | Hypomethylated in FP vs FN |
| cg18754857 | 0.452   | 0.746   | -0.294    | 2e-06            | NA                    | Hypomethylated in FP vs FN |
| cg02431851 | 0.455   | 0.775   | -0.321    | 2e-06            | NA                    | Hypomethylated in FP vs FN |
| cg00717218 | 0.156   | 0.550   | -0.394    | 2e-06            | PTGER2                | Hypomethylated in FP vs FN |
| cg07610777 | 0.367   | 0.704   | -0.336    | 2e-06            | GJB6                  | Hypomethylated in FP vs FN |
| cg10223066 | 0.082   | 0.525   | -0.443    | 2e-06            | CHFR                  | Hypomethylated in FP vs FN |
| cg21202740 | 0.422   | 0.678   | -0.256    | 2e-06            | NA                    | Hypomethylated in FP vs FN |
| cg06152945 | 0.264   | 0.632   | -0.368    | 2e-06            | NA                    | Hypomethylated in FP vs FN |
| cg02050986 | 0.195   | 0.455   | -0.260    | 2e-06            | NA                    | Hypomethylated in FP vs FN |
| cg21122075 | 0.321   | 0.609   | -0.288    | 2e-06            | NA                    | Hypomethylated in FP vs FN |
| cg08375222 | 0.432   | 0.685   | -0.254    | 2e-06            | NA                    | Hypomethylated in FP vs FN |
| cg01965552 | 0.313   | 0.672   | -0.359    | 2e-06            | NA                    | Hypomethylated in FP vs FN |
| cg17862146 | 0.304   | 0.679   | -0.376    | 2e-06            | NA                    | Hypomethylated in FP vs FN |
| cg21131022 | 0.380   | 0.740   | -0.360    | 2e-06            | NA                    | Hypomethylated in FP vs FN |
| cg04921068 | 0.344   | 0.683   | -0.339    | 2e-06            | NA                    | Hypomethylated in FP vs FN |



### Supplementary Table 7 (continued)

| Probe      | FP.mean | FN.mean | Mean.diff | Adjusted.P.value | Promoter.related.gene | Category                   |
|------------|---------|---------|-----------|------------------|-----------------------|----------------------------|
| cg05949181 | 0.428   | 0.745   | -0.317    | 2e-06            | NA                    | Hypomethylated in FP vs FN |
| cg25071794 | 0.576   | 0.845   | -0.269    | 2e-06            | NA                    | Hypomethylated in FP vs FN |
| cg22012248 | 0.326   | 0.619   | -0.293    | 2e-06            | NA                    | Hypomethylated in FP vs FN |
| cg15923943 | 0.365   | 0.668   | -0.303    | 2e-06            | NA                    | Hypomethylated in FP vs FN |
| cg13280108 | 0.325   | 0.652   | -0.327    | 2e-06            | NA                    | Hypomethylated in FP vs FN |
| cg07222309 | 0.165   | 0.522   | -0.357    | 2e-06            | NA                    | Hypomethylated in FP vs FN |
| cg16164607 | 0.401   | 0.718   | -0.318    | 2e-06            | NA                    | Hypomethylated in FP vs FN |
| cg00925244 | 0.469   | 0.757   | -0.287    | 2e-06            | NA                    | Hypomethylated in FP vs FN |
| cg13366863 | 0.323   | 0.671   | -0.348    | 2e-06            | NA                    | Hypomethylated in FP vs FN |
| cg07782620 | 0.362   | 0.702   | -0.339    | 2e-06            | NA                    | Hypomethylated in FP vs FN |
| cg27643890 | 0.360   | 0.650   | -0.289    | 2e-06            | NA                    | Hypomethylated in FP vs FN |
| cg22486630 | 0.599   | 0.876   | -0.277    | 2e-06            | NA                    | Hypomethylated in FP vs FN |
| cg06195987 | 0.249   | 0.657   | -0.408    | 2e-06            | NA                    | Hypomethylated in FP vs FN |
| cg16863382 | 0.479   | 0.795   | -0.316    | 2e-06            | CTRB1                 | Hypomethylated in FP vs FN |
| cg26353598 | 0.393   | 0.724   | -0.331    | 2e-06            | NA                    | Hypomethylated in FP vs FN |
| cg24371114 | 0.336   | 0.636   | -0.300    | 2e-06            | NA                    | Hypomethylated in FP vs FN |
| cg14335434 | 0.509   | 0.800   | -0.291    | 2e-06            | NA                    | Hypomethylated in FP vs FN |
| cg10063575 | 0.415   | 0.696   | -0.281    | 2e-06            | NA                    | Hypomethylated in FP vs FN |
| cg07211768 | 0.349   | 0.704   | -0.355    | 2e-06            | NA                    | Hypomethylated in FP vs FN |
| cg13484329 | 0.358   | 0.653   | -0.295    | 2e-06            | NA                    | Hypomethylated in FP vs FN |
| cg12357484 | 0.332   | 0.651   | -0.319    | 2e-06            | NA                    | Hypomethylated in FP vs FN |
| cg24879087 | 0.438   | 0.756   | -0.318    | 2e-06            | NA                    | Hypomethylated in FP vs FN |
| cg15325154 | 0.350   | 0.695   | -0.345    | 2e-06            | MGC26647              | Hypomethylated in FP vs FN |
| cg18009508 | 0.509   | 0.824   | -0.315    | 2e-06            | NA                    | Hypomethylated in FP vs FN |
| cg12076931 | 0.458   | 0.715   | -0.257    | 2e-06            | NA                    | Hypomethylated in FP vs FN |

**Supplementary Table 7 (continued)**

| Probe      | FP.mean | FN.mean | Mean.diff | Adjusted.P.value | Promoter.related.gene | Category                   |
|------------|---------|---------|-----------|------------------|-----------------------|----------------------------|
| cg04292660 | 0.522   | 0.797   | -0.274    | 2e-06            | NA                    | Hypomethylated in FP vs FN |
| cg15541630 | 0.322   | 0.697   | -0.375    | 2e-06            | PSKH2                 | Hypomethylated in FP vs FN |
| cg08541054 | 0.438   | 0.753   | -0.316    | 2e-06            | NA                    | Hypomethylated in FP vs FN |
| cg01291854 | 0.283   | 0.608   | -0.325    | 2e-06            | NA                    | Hypomethylated in FP vs FN |
| cg14078070 | 0.562   | 0.822   | -0.260    | 2e-06            | NA                    | Hypomethylated in FP vs FN |
| cg07022478 | 0.450   | 0.741   | -0.290    | 2e-06            | NA                    | Hypomethylated in FP vs FN |
| cg22511262 | 0.161   | 0.599   | -0.438    | 2e-06            | NA                    | Hypomethylated in FP vs FN |
| cg06943668 | 0.471   | 0.800   | -0.328    | 2e-06            | NA                    | Hypomethylated in FP vs FN |
| cg13884376 | 0.504   | 0.807   | -0.302    | 2e-06            | NA                    | Hypomethylated in FP vs FN |
| cg00580497 | 0.298   | 0.570   | -0.272    | 2e-06            | NA                    | Hypomethylated in FP vs FN |
| cg05281206 | 0.308   | 0.703   | -0.394    | 2e-06            | CCL13                 | Hypomethylated in FP vs FN |
| cg06197836 | 0.361   | 0.669   | -0.308    | 2e-06            | NA                    | Hypomethylated in FP vs FN |
| cg25339815 | 0.494   | 0.776   | -0.282    | 2e-06            | NA                    | Hypomethylated in FP vs FN |
| cg13810457 | 0.323   | 0.667   | -0.343    | 2e-06            | NA                    | Hypomethylated in FP vs FN |
| cg17608490 | 0.236   | 0.654   | -0.418    | 2e-06            | NA                    | Hypomethylated in FP vs FN |
| cg19229651 | 0.560   | 0.849   | -0.289    | 2e-06            | NA                    | Hypomethylated in FP vs FN |
| cg27223891 | 0.611   | 0.867   | -0.256    | 2e-06            | NA                    | Hypomethylated in FP vs FN |
| cg11081894 | 0.427   | 0.727   | -0.301    | 2e-06            | NA                    | Hypomethylated in FP vs FN |
| cg03693706 | 0.487   | 0.754   | -0.267    | 2e-06            | NA                    | Hypomethylated in FP vs FN |
| cg11368643 | 0.409   | 0.726   | -0.316    | 2e-06            | PCDHB15               | Hypomethylated in FP vs FN |
| cg22957360 | 0.284   | 0.691   | -0.407    | 2e-06            | NA                    | Hypomethylated in FP vs FN |
| cg14684166 | 0.389   | 0.688   | -0.299    | 2e-06            | NA                    | Hypomethylated in FP vs FN |
| cg18334819 | 0.567   | 0.832   | -0.265    | 2e-06            | NA                    | Hypomethylated in FP vs FN |
| cg15596932 | 0.515   | 0.816   | -0.301    | 2e-06            | SOST                  | Hypomethylated in FP vs FN |
| cg22573590 | 0.318   | 0.619   | -0.301    | 2e-06            | NA                    | Hypomethylated in FP vs FN |

### Supplementary Table 7 (continued)

| Probe      | FP.mean | FN.mean | Mean.diff | Adjusted.P.value | Promoter.related.gene | Category                   |
|------------|---------|---------|-----------|------------------|-----------------------|----------------------------|
| cg22202031 | 0.108   | 0.465   | -0.357    | 2e-06            | CHFR                  | Hypomethylated in FP vs FN |
| cg19589396 | 0.395   | 0.685   | -0.291    | 2e-06            | NA                    | Hypomethylated in FP vs FN |
| cg12849787 | 0.558   | 0.840   | -0.282    | 2e-06            | NA                    | Hypomethylated in FP vs FN |
| cg03516599 | 0.418   | 0.740   | -0.322    | 2e-06            | NA                    | Hypomethylated in FP vs FN |
| cg06636938 | 0.425   | 0.708   | -0.283    | 2e-06            | NA                    | Hypomethylated in FP vs FN |
| cg17643864 | 0.126   | 0.519   | -0.394    | 2e-06            | NA                    | Hypomethylated in FP vs FN |
| cg04877287 | 0.517   | 0.820   | -0.303    | 2e-06            | NA                    | Hypomethylated in FP vs FN |
| cg07969419 | 0.471   | 0.812   | -0.342    | 2e-06            | NA                    | Hypomethylated in FP vs FN |
| cg07576363 | 0.226   | 0.566   | -0.340    | 2e-06            | NA                    | Hypomethylated in FP vs FN |
| cg10497345 | 0.483   | 0.764   | -0.281    | 2e-06            | NA                    | Hypomethylated in FP vs FN |
| cg15931921 | 0.427   | 0.746   | -0.319    | 2e-06            | NA                    | Hypomethylated in FP vs FN |
| cg26524256 | 0.535   | 0.796   | -0.261    | 2e-06            | NA                    | Hypomethylated in FP vs FN |
| cg21061960 | 0.283   | 0.568   | -0.285    | 2e-06            | NA                    | Hypomethylated in FP vs FN |
| cg20932053 | 0.565   | 0.842   | -0.277    | 2e-06            | CPM                   | Hypomethylated in FP vs FN |
| cg14754494 | 0.415   | 0.704   | -0.289    | 2e-06            | NA                    | Hypomethylated in FP vs FN |
| cg12220466 | 0.561   | 0.833   | -0.272    | 2e-06            | NA                    | Hypomethylated in FP vs FN |
| cg26676468 | 0.254   | 0.623   | -0.368    | 2e-06            | NA                    | Hypomethylated in FP vs FN |
| cg00840332 | 0.235   | 0.711   | -0.476    | 2e-06            | LEP                   | Hypomethylated in FP vs FN |
| cg15988514 | 0.115   | 0.530   | -0.415    | 2e-06            | NA                    | Hypomethylated in FP vs FN |
| cg06873590 | 0.305   | 0.619   | -0.315    | 2e-06            | NA                    | Hypomethylated in FP vs FN |
| cg23387597 | 0.514   | 0.789   | -0.275    | 2e-06            | ITPRIP                | Hypomethylated in FP vs FN |
| cg02081006 | 0.337   | 0.683   | -0.346    | 2e-06            | NA                    | Hypomethylated in FP vs FN |
| cg04392760 | 0.621   | 0.881   | -0.260    | 2e-06            | NA                    | Hypomethylated in FP vs FN |
| cg19414706 | 0.189   | 0.445   | -0.256    | 2e-06            | NA                    | Hypomethylated in FP vs FN |
| cg15821544 | 0.529   | 0.806   | -0.277    | 2e-06            | NA                    | Hypomethylated in FP vs FN |

### Supplementary Table 7 (continued)

| Probe      | FP.mean | FN.mean | Mean.diff | Adjusted.P.value | Promoter.related.gene | Category                   |
|------------|---------|---------|-----------|------------------|-----------------------|----------------------------|
| cg06163274 | 0.420   | 0.721   | -0.302    | 2e-06            | CCDC68                | Hypomethylated in FP vs FN |
| cg25608490 | 0.305   | 0.677   | -0.372    | 2e-06            | WNT16                 | Hypomethylated in FP vs FN |
| cg04130108 | 0.524   | 0.836   | -0.312    | 2e-06            | NA                    | Hypomethylated in FP vs FN |
| cg05326036 | 0.462   | 0.832   | -0.370    | 2e-06            | NA                    | Hypomethylated in FP vs FN |
| cg10326031 | 0.517   | 0.805   | -0.288    | 2e-06            | IGFBP1                | Hypomethylated in FP vs FN |
| cg14042601 | 0.487   | 0.793   | -0.306    | 2e-06            | NA                    | Hypomethylated in FP vs FN |
| cg27160726 | 0.309   | 0.593   | -0.285    | 2e-06            | NA                    | Hypomethylated in FP vs FN |
| cg16811771 | 0.412   | 0.762   | -0.350    | 2e-06            | NA                    | Hypomethylated in FP vs FN |
| cg17446371 | 0.186   | 0.539   | -0.353    | 2e-06            | NA                    | Hypomethylated in FP vs FN |
| cg26793720 | 0.261   | 0.584   | -0.323    | 2e-06            | NA                    | Hypomethylated in FP vs FN |
| cg00021256 | 0.258   | 0.638   | -0.380    | 2e-06            | NA                    | Hypomethylated in FP vs FN |
| cg26165269 | 0.110   | 0.585   | -0.475    | 2e-06            | NA                    | Hypomethylated in FP vs FN |
| cg19787448 | 0.249   | 0.665   | -0.416    | 2e-06            | NA                    | Hypomethylated in FP vs FN |
| cg13228314 | 0.523   | 0.792   | -0.269    | 2e-06            | NA                    | Hypomethylated in FP vs FN |
| cg16962557 | 0.338   | 0.641   | -0.303    | 2e-06            | NA                    | Hypomethylated in FP vs FN |
| cg08194458 | 0.241   | 0.495   | -0.253    | 2e-06            | NA                    | Hypomethylated in FP vs FN |
| cg25555059 | 0.296   | 0.686   | -0.389    | 2e-06            | SLC27A6               | Hypomethylated in FP vs FN |
| cg13648550 | 0.436   | 0.765   | -0.329    | 2e-06            | NA                    | Hypomethylated in FP vs FN |
| cg23257697 | 0.385   | 0.711   | -0.326    | 2e-06            | NA                    | Hypomethylated in FP vs FN |
| cg10694914 | 0.480   | 0.773   | -0.293    | 2e-06            | POU2AF1               | Hypomethylated in FP vs FN |
| cg14795163 | 0.442   | 0.727   | -0.285    | 2e-06            | NA                    | Hypomethylated in FP vs FN |
| cg05234326 | 0.364   | 0.659   | -0.295    | 2e-06            | NA                    | Hypomethylated in FP vs FN |
| cg13767940 | 0.281   | 0.656   | -0.376    | 2e-06            | MIR34B_BTG4_MIR34C    | Hypomethylated in FP vs FN |
| cg09317772 | 0.450   | 0.722   | -0.272    | 2e-06            | NME2                  | Hypomethylated in FP vs FN |
| cg11348257 | 0.522   | 0.806   | -0.283    | 2e-06            | NA                    | Hypomethylated in FP vs FN |

### Supplementary Table 7 (continued)

| Probe      | FP.mean | FN.mean | Mean.diff | Adjusted.P.value | Promoter.related.gene | Category                   |
|------------|---------|---------|-----------|------------------|-----------------------|----------------------------|
| cg14311523 | 0.442   | 0.784   | -0.342    | 2e-06            | NA                    | Hypomethylated in FP vs FN |
| cg04253799 | 0.467   | 0.742   | -0.274    | 2e-06            | NA                    | Hypomethylated in FP vs FN |
| cg17169998 | 0.256   | 0.602   | -0.346    | 2e-06            | MLC1                  | Hypomethylated in FP vs FN |
| cg06248767 | 0.160   | 0.558   | -0.398    | 2e-06            | NA                    | Hypomethylated in FP vs FN |
| cg23725454 | 0.270   | 0.548   | -0.278    | 2e-06            | GSTP1                 | Hypomethylated in FP vs FN |
| cg26021246 | 0.264   | 0.682   | -0.418    | 2e-06            | ST14                  | Hypomethylated in FP vs FN |
| cg25117092 | 0.470   | 0.743   | -0.273    | 2e-06            | NA                    | Hypomethylated in FP vs FN |
| cg09190188 | 0.127   | 0.435   | -0.307    | 2e-06            | NA                    | Hypomethylated in FP vs FN |
| cg17912370 | 0.075   | 0.534   | -0.459    | 2e-06            | C3orf55               | Hypomethylated in FP vs FN |
| cg08541962 | 0.313   | 0.566   | -0.254    | 2e-06            | GJD4                  | Hypomethylated in FP vs FN |
| cg04987122 | 0.438   | 0.814   | -0.377    | 2e-06            | NA                    | Hypomethylated in FP vs FN |
| cg02785332 | 0.508   | 0.821   | -0.313    | 2e-06            | NA                    | Hypomethylated in FP vs FN |
| cg18735146 | 0.369   | 0.701   | -0.332    | 2e-06            | IFT88                 | Hypomethylated in FP vs FN |
| cg24041078 | 0.130   | 0.565   | -0.435    | 2e-06            | BTG4_MIR34C           | Hypomethylated in FP vs FN |
| cg01578875 | 0.198   | 0.526   | -0.328    | 2e-06            | NA                    | Hypomethylated in FP vs FN |
| cg15854394 | 0.423   | 0.772   | -0.349    | 2e-06            | NA                    | Hypomethylated in FP vs FN |
| cg24825693 | 0.319   | 0.632   | -0.313    | 2e-06            | NA                    | Hypomethylated in FP vs FN |
| cg17484874 | 0.464   | 0.723   | -0.260    | 2e-06            | NA                    | Hypomethylated in FP vs FN |
| cg07903023 | 0.355   | 0.693   | -0.338    | 2e-06            | NA                    | Hypomethylated in FP vs FN |
| cg02812036 | 0.235   | 0.576   | -0.341    | 2e-06            | YBX2                  | Hypomethylated in FP vs FN |
| cg25602520 | 0.441   | 0.765   | -0.324    | 2e-06            | NA                    | Hypomethylated in FP vs FN |
| cg11673092 | 0.254   | 0.671   | -0.417    | 2e-06            | ARMC3                 | Hypomethylated in FP vs FN |
| cg23146180 | 0.444   | 0.722   | -0.278    | 2e-06            | NA                    | Hypomethylated in FP vs FN |
| cg05258736 | 0.390   | 0.712   | -0.323    | 2e-06            | NA                    | Hypomethylated in FP vs FN |
| cg18236617 | 0.225   | 0.527   | -0.302    | 2e-06            | NA                    | Hypomethylated in FP vs FN |

### Supplementary Table 7 (continued)

| Probe      | FP.mean | FN.mean | Mean.diff | Adjusted.P.value | Promoter.related.gene | Category                   |
|------------|---------|---------|-----------|------------------|-----------------------|----------------------------|
| cg22373112 | 0.344   | 0.670   | -0.326    | 2e-06            | RAB5C                 | Hypomethylated in FP vs FN |
| cg03977089 | 0.158   | 0.529   | -0.372    | 2e-06            | NA                    | Hypomethylated in FP vs FN |
| cg13320964 | 0.509   | 0.829   | -0.320    | 2e-06            | NA                    | Hypomethylated in FP vs FN |
| cg05919211 | 0.498   | 0.766   | -0.268    | 2e-06            | CMTM5                 | Hypomethylated in FP vs FN |
| cg14711433 | 0.459   | 0.711   | -0.253    | 2e-06            | NA                    | Hypomethylated in FP vs FN |
| cg10403251 | 0.395   | 0.730   | -0.335    | 2e-06            | NA                    | Hypomethylated in FP vs FN |
| cg01645998 | 0.245   | 0.638   | -0.393    | 2e-06            | SDR42E1               | Hypomethylated in FP vs FN |
| cg06080250 | 0.313   | 0.613   | -0.300    | 2e-06            | NA                    | Hypomethylated in FP vs FN |
| cg15287353 | 0.456   | 0.734   | -0.278    | 2e-06            | NA                    | Hypomethylated in FP vs FN |
| cg15603885 | 0.450   | 0.755   | -0.306    | 2e-06            | ABRA                  | Hypomethylated in FP vs FN |
| cg26342676 | 0.561   | 0.831   | -0.270    | 2e-06            | LOC100129794          | Hypomethylated in FP vs FN |
| cg05565537 | 0.559   | 0.836   | -0.277    | 2e-06            | NA                    | Hypomethylated in FP vs FN |
| cg18887769 | 0.478   | 0.790   | -0.312    | 2e-06            | NA                    | Hypomethylated in FP vs FN |
| cg01790523 | 0.284   | 0.631   | -0.347    | 2e-06            | NA                    | Hypomethylated in FP vs FN |
| cg26942930 | 0.427   | 0.726   | -0.299    | 2e-06            | NA                    | Hypomethylated in FP vs FN |
| cg15307891 | 0.073   | 0.567   | -0.494    | 2e-06            | GALNT3                | Hypomethylated in FP vs FN |
| cg19928046 | 0.172   | 0.460   | -0.288    | 2e-06            | CD74                  | Hypomethylated in FP vs FN |
| cg11791144 | 0.325   | 0.728   | -0.403    | 2e-06            | NA                    | Hypomethylated in FP vs FN |
| cg06320380 | 0.200   | 0.525   | -0.325    | 2e-06            | NA                    | Hypomethylated in FP vs FN |
| cg10232893 | 0.348   | 0.632   | -0.283    | 2e-06            | NA                    | Hypomethylated in FP vs FN |
| cg23208513 | 0.118   | 0.566   | -0.448    | 2e-06            | RGS22                 | Hypomethylated in FP vs FN |
| cg24990131 | 0.099   | 0.442   | -0.343    | 2e-06            | NA                    | Hypomethylated in FP vs FN |
| cg25427871 | 0.410   | 0.690   | -0.280    | 2e-06            | SLC22A18              | Hypomethylated in FP vs FN |
| cg00035636 | 0.152   | 0.577   | -0.426    | 3e-06            | NA                    | Hypomethylated in FP vs FN |
| cg02613510 | 0.384   | 0.730   | -0.346    | 3e-06            | BDNF                  | Hypomethylated in FP vs FN |

### Supplementary Table 7 (continued)

| Probe      | FP.mean | FN.mean | Mean.diff | Adjusted.P.value | Promoter.related.gene | Category                   |
|------------|---------|---------|-----------|------------------|-----------------------|----------------------------|
| cg17259952 | 0.198   | 0.477   | -0.280    | 3e-06            | NA                    | Hypomethylated in FP vs FN |
| cg11815480 | 0.253   | 0.593   | -0.340    | 3e-06            | NA                    | Hypomethylated in FP vs FN |
| cg13937986 | 0.460   | 0.797   | -0.337    | 3e-06            | NA                    | Hypomethylated in FP vs FN |
| cg10940462 | 0.299   | 0.669   | -0.370    | 3e-06            | NA                    | Hypomethylated in FP vs FN |
| cg01046798 | 0.421   | 0.705   | -0.284    | 3e-06            | NA                    | Hypomethylated in FP vs FN |
| cg24915503 | 0.308   | 0.660   | -0.352    | 3e-06            | NA                    | Hypomethylated in FP vs FN |
| cg05324393 | 0.438   | 0.738   | -0.300    | 3e-06            | NA                    | Hypomethylated in FP vs FN |
| cg08145723 | 0.285   | 0.689   | -0.404    | 3e-06            | ST14                  | Hypomethylated in FP vs FN |
| cg24348573 | 0.331   | 0.620   | -0.289    | 3e-06            | IL15RA                | Hypomethylated in FP vs FN |
| cg20093489 | 0.416   | 0.744   | -0.328    | 3e-06            | NA                    | Hypomethylated in FP vs FN |
| cg21929875 | 0.465   | 0.791   | -0.326    | 3e-06            | VSIG2                 | Hypomethylated in FP vs FN |
| cg13105327 | 0.460   | 0.759   | -0.299    | 3e-06            | NA                    | Hypomethylated in FP vs FN |
| cg05813788 | 0.194   | 0.473   | -0.279    | 3e-06            | NA                    | Hypomethylated in FP vs FN |
| cg00612299 | 0.253   | 0.613   | -0.359    | 3e-06            | NA                    | Hypomethylated in FP vs FN |
| cg19218509 | 0.407   | 0.727   | -0.321    | 3e-06            | NA                    | Hypomethylated in FP vs FN |
| cg03862787 | 0.271   | 0.606   | -0.336    | 3e-06            | NA                    | Hypomethylated in FP vs FN |
| cg01386493 | 0.325   | 0.601   | -0.277    | 3e-06            | ADRB3                 | Hypomethylated in FP vs FN |
| cg01596854 | 0.384   | 0.702   | -0.318    | 3e-06            | NA                    | Hypomethylated in FP vs FN |
| cg06511274 | 0.516   | 0.801   | -0.285    | 3e-06            | NA                    | Hypomethylated in FP vs FN |
| cg00843019 | 0.429   | 0.790   | -0.360    | 3e-06            | NA                    | Hypomethylated in FP vs FN |
| cg20704654 | 0.612   | 0.897   | -0.285    | 3e-06            | NCRNA00028            | Hypomethylated in FP vs FN |
| cg18128969 | 0.287   | 0.702   | -0.415    | 3e-06            | NCAM2                 | Hypomethylated in FP vs FN |
| cg23946462 | 0.349   | 0.704   | -0.355    | 3e-06            | NA                    | Hypomethylated in FP vs FN |
| cg15822765 | 0.383   | 0.800   | -0.417    | 3e-06            | NA                    | Hypomethylated in FP vs FN |
| cg11795854 | 0.174   | 0.664   | -0.490    | 3e-06            | NA                    | Hypomethylated in FP vs FN |

### Supplementary Table 7 (continued)

| Probe      | FP.mean | FN.mean | Mean.diff | Adjusted.P.value | Promoter.related.gene | Category                   |
|------------|---------|---------|-----------|------------------|-----------------------|----------------------------|
| cg06118245 | 0.491   | 0.758   | -0.267    | 3e-06            | NA                    | Hypomethylated in FP vs FN |
| cg02972941 | 0.375   | 0.724   | -0.349    | 3e-06            | NA                    | Hypomethylated in FP vs FN |
| cg19904905 | 0.387   | 0.682   | -0.295    | 3e-06            | NA                    | Hypomethylated in FP vs FN |
| cg05096751 | 0.273   | 0.612   | -0.340    | 3e-06            | NA                    | Hypomethylated in FP vs FN |
| cg24870966 | 0.222   | 0.501   | -0.279    | 3e-06            | NA                    | Hypomethylated in FP vs FN |
| cg27121661 | 0.472   | 0.750   | -0.278    | 3e-06            | NA                    | Hypomethylated in FP vs FN |
| cg03002479 | 0.218   | 0.573   | -0.355    | 3e-06            | EPHA1                 | Hypomethylated in FP vs FN |
| cg01138164 | 0.293   | 0.588   | -0.295    | 3e-06            | NA                    | Hypomethylated in FP vs FN |
| cg20659752 | 0.429   | 0.764   | -0.335    | 3e-06            | NA                    | Hypomethylated in FP vs FN |
| cg09656934 | 0.414   | 0.737   | -0.323    | 3e-06            | NA                    | Hypomethylated in FP vs FN |
| cg02526439 | 0.444   | 0.765   | -0.321    | 3e-06            | NA                    | Hypomethylated in FP vs FN |
| cg01554437 | 0.176   | 0.543   | -0.367    | 3e-06            | NA                    | Hypomethylated in FP vs FN |
| cg10131699 | 0.505   | 0.791   | -0.286    | 3e-06            | NA                    | Hypomethylated in FP vs FN |
| cg08410691 | 0.360   | 0.647   | -0.288    | 3e-06            | NA                    | Hypomethylated in FP vs FN |
| cg08678044 | 0.329   | 0.649   | -0.320    | 3e-06            | CLEC11A               | Hypomethylated in FP vs FN |
| cg25942990 | 0.405   | 0.715   | -0.311    | 3e-06            | HOXD4_MIR10B          | Hypomethylated in FP vs FN |
| cg23056713 | 0.539   | 0.842   | -0.303    | 3e-06            | NA                    | Hypomethylated in FP vs FN |
| cg11228758 | 0.300   | 0.644   | -0.344    | 3e-06            | NA                    | Hypomethylated in FP vs FN |
| cg09041614 | 0.464   | 0.746   | -0.283    | 3e-06            | NA                    | Hypomethylated in FP vs FN |
| cg15298719 | 0.372   | 0.659   | -0.288    | 3e-06            | CLDN7                 | Hypomethylated in FP vs FN |
| cg17484944 | 0.235   | 0.533   | -0.298    | 3e-06            | NA                    | Hypomethylated in FP vs FN |
| cg06797069 | 0.394   | 0.667   | -0.273    | 3e-06            | NA                    | Hypomethylated in FP vs FN |
| cg00862376 | 0.181   | 0.613   | -0.432    | 3e-06            | NA                    | Hypomethylated in FP vs FN |
| cg03742132 | 0.624   | 0.884   | -0.260    | 3e-06            | MIR617                | Hypomethylated in FP vs FN |
| cg21687740 | 0.370   | 0.721   | -0.351    | 3e-06            | NA                    | Hypomethylated in FP vs FN |



### Supplementary Table 7 (continued)

| Probe      | FP.mean | FN.mean | Mean.diff | Adjusted.P.value | Promoter.related.gene | Category                   |
|------------|---------|---------|-----------|------------------|-----------------------|----------------------------|
| cg24664929 | 0.524   | 0.809   | -0.286    | 3e-06            | NA                    | Hypomethylated in FP vs FN |
| cg03004417 | 0.404   | 0.749   | -0.344    | 3e-06            | NA                    | Hypomethylated in FP vs FN |
| cg15044073 | 0.167   | 0.572   | -0.405    | 3e-06            | SWAP70                | Hypomethylated in FP vs FN |
| cg05499376 | 0.398   | 0.705   | -0.307    | 3e-06            | NA                    | Hypomethylated in FP vs FN |
| cg12180551 | 0.395   | 0.715   | -0.321    | 3e-06            | NA                    | Hypomethylated in FP vs FN |
| cg25866895 | 0.406   | 0.745   | -0.339    | 3e-06            | GSTP1                 | Hypomethylated in FP vs FN |
| cg11809476 | 0.379   | 0.732   | -0.353    | 3e-06            | NA                    | Hypomethylated in FP vs FN |
| cg04651583 | 0.519   | 0.778   | -0.259    | 3e-06            | NA                    | Hypomethylated in FP vs FN |
| cg10634182 | 0.422   | 0.751   | -0.329    | 3e-06            | NA                    | Hypomethylated in FP vs FN |
| cg22987447 | 0.121   | 0.573   | -0.451    | 3e-06            | C3orf55               | Hypomethylated in FP vs FN |
| cg14486632 | 0.474   | 0.820   | -0.346    | 3e-06            | NA                    | Hypomethylated in FP vs FN |
| cg24793022 | 0.489   | 0.749   | -0.259    | 3e-06            | NA                    | Hypomethylated in FP vs FN |
| cg06135425 | 0.349   | 0.637   | -0.288    | 3e-06            | NA                    | Hypomethylated in FP vs FN |
| cg12587615 | 0.280   | 0.601   | -0.321    | 3e-06            | NA                    | Hypomethylated in FP vs FN |
| cg18148314 | 0.510   | 0.771   | -0.261    | 3e-06            | NA                    | Hypomethylated in FP vs FN |
| cg23942526 | 0.323   | 0.681   | -0.358    | 3e-06            | NA                    | Hypomethylated in FP vs FN |
| cg00587042 | 0.133   | 0.474   | -0.341    | 3e-06            | NA                    | Hypomethylated in FP vs FN |
| cg12772086 | 0.450   | 0.732   | -0.281    | 3e-06            | NA                    | Hypomethylated in FP vs FN |
| cg26803305 | 0.386   | 0.697   | -0.311    | 3e-06            | NA                    | Hypomethylated in FP vs FN |
| cg27235340 | 0.511   | 0.822   | -0.310    | 3e-06            | NA                    | Hypomethylated in FP vs FN |
| cg14029686 | 0.204   | 0.659   | -0.454    | 3e-06            | NA                    | Hypomethylated in FP vs FN |
| cg09270346 | 0.268   | 0.567   | -0.298    | 3e-06            | NA                    | Hypomethylated in FP vs FN |
| cg02776448 | 0.402   | 0.702   | -0.299    | 3e-06            | NA                    | Hypomethylated in FP vs FN |
| cg06349628 | 0.127   | 0.544   | -0.417    | 3e-06            | NA                    | Hypomethylated in FP vs FN |
| cg24643381 | 0.402   | 0.742   | -0.341    | 3e-06            | NA                    | Hypomethylated in FP vs FN |

**Supplementary Table 7 (continued)**

| Probe      | FP.mean | FN.mean | Mean.diff | Adjusted.P.value | Promoter.related.gene | Category                   |
|------------|---------|---------|-----------|------------------|-----------------------|----------------------------|
| cg05595469 | 0.381   | 0.729   | -0.348    | 3e-06            | NA                    | Hypomethylated in FP vs FN |
| cg13929065 | 0.473   | 0.791   | -0.318    | 3e-06            | NA                    | Hypomethylated in FP vs FN |
| cg13670091 | 0.343   | 0.636   | -0.293    | 3e-06            | NA                    | Hypomethylated in FP vs FN |
| cg20523466 | 0.520   | 0.788   | -0.268    | 3e-06            | NA                    | Hypomethylated in FP vs FN |
| cg05466596 | 0.418   | 0.736   | -0.319    | 3e-06            | NA                    | Hypomethylated in FP vs FN |
| cg15446391 | 0.512   | 0.778   | -0.267    | 3e-06            | NA                    | Hypomethylated in FP vs FN |
| cg14794191 | 0.582   | 0.840   | -0.258    | 3e-06            | NA                    | Hypomethylated in FP vs FN |
| cg01943577 | 0.514   | 0.850   | -0.336    | 3e-06            | NA                    | Hypomethylated in FP vs FN |
| cg07577267 | 0.278   | 0.705   | -0.428    | 3e-06            | NA                    | Hypomethylated in FP vs FN |
| cg20661080 | 0.434   | 0.731   | -0.297    | 3e-06            | NA                    | Hypomethylated in FP vs FN |
| cg05998930 | 0.333   | 0.641   | -0.308    | 3e-06            | NA                    | Hypomethylated in FP vs FN |
| cg23220533 | 0.251   | 0.587   | -0.335    | 3e-06            | OVOL1                 | Hypomethylated in FP vs FN |
| cg03399655 | 0.547   | 0.807   | -0.260    | 3e-06            | NA                    | Hypomethylated in FP vs FN |
| cg05012661 | 0.555   | 0.805   | -0.251    | 3e-06            | NA                    | Hypomethylated in FP vs FN |
| cg25508679 | 0.415   | 0.796   | -0.381    | 3e-06            | NA                    | Hypomethylated in FP vs FN |
| cg11521325 | 0.228   | 0.482   | -0.254    | 3e-06            | NA                    | Hypomethylated in FP vs FN |
| cg10799668 | 0.389   | 0.790   | -0.401    | 3e-06            | NA                    | Hypomethylated in FP vs FN |
| cg25407540 | 0.287   | 0.602   | -0.314    | 3e-06            | NA                    | Hypomethylated in FP vs FN |
| cg03268012 | 0.481   | 0.736   | -0.255    | 3e-06            | NA                    | Hypomethylated in FP vs FN |
| cg27027655 | 0.551   | 0.803   | -0.252    | 3e-06            | RAMP3                 | Hypomethylated in FP vs FN |
| cg09835740 | 0.309   | 0.646   | -0.337    | 3e-06            | NA                    | Hypomethylated in FP vs FN |
| cg00664743 | 0.351   | 0.660   | -0.309    | 3e-06            | NA                    | Hypomethylated in FP vs FN |
| cg00306284 | 0.562   | 0.830   | -0.268    | 3e-06            | SLC5A10               | Hypomethylated in FP vs FN |
| cg20752472 | 0.558   | 0.830   | -0.272    | 3e-06            | NA                    | Hypomethylated in FP vs FN |
| cg19463531 | 0.341   | 0.644   | -0.302    | 3e-06            | PDE6B                 | Hypomethylated in FP vs FN |

### Supplementary Table 7 (continued)

| Probe      | FP.mean | FN.mean | Mean.diff | Adjusted.P.value | Promoter.related.gene | Category                   |
|------------|---------|---------|-----------|------------------|-----------------------|----------------------------|
| cg11801727 | 0.640   | 0.892   | -0.252    | 3e-06            | NA                    | Hypomethylated in FP vs FN |
| cg21039380 | 0.210   | 0.478   | -0.268    | 3e-06            | NA                    | Hypomethylated in FP vs FN |
| cg12120205 | 0.462   | 0.750   | -0.287    | 3e-06            | NA                    | Hypomethylated in FP vs FN |
| cg13808240 | 0.068   | 0.459   | -0.390    | 3e-06            | NA                    | Hypomethylated in FP vs FN |
| cg07109438 | 0.566   | 0.820   | -0.253    | 3e-06            | NA                    | Hypomethylated in FP vs FN |
| cg02998075 | 0.237   | 0.521   | -0.284    | 3e-06            | NA                    | Hypomethylated in FP vs FN |
| cg03840289 | 0.381   | 0.665   | -0.284    | 3e-06            | NA                    | Hypomethylated in FP vs FN |
| cg20624698 | 0.444   | 0.764   | -0.321    | 3e-06            | NA                    | Hypomethylated in FP vs FN |
| cg12940439 | 0.189   | 0.514   | -0.325    | 3e-06            | NA                    | Hypomethylated in FP vs FN |
| cg25720825 | 0.392   | 0.722   | -0.330    | 3e-06            | NA                    | Hypomethylated in FP vs FN |
| cg05281603 | 0.169   | 0.512   | -0.343    | 3e-06            | BTG4_C11orf88_MIR34C  | Hypomethylated in FP vs FN |
| cg25136495 | 0.254   | 0.680   | -0.426    | 3e-06            | NA                    | Hypomethylated in FP vs FN |
| cg04306024 | 0.104   | 0.543   | -0.439    | 3e-06            | NA                    | Hypomethylated in FP vs FN |
| cg17519955 | 0.429   | 0.745   | -0.316    | 3e-06            | NA                    | Hypomethylated in FP vs FN |
| cg16667631 | 0.298   | 0.674   | -0.375    | 3e-06            | NA                    | Hypomethylated in FP vs FN |
| cg01446971 | 0.363   | 0.711   | -0.349    | 3e-06            | NA                    | Hypomethylated in FP vs FN |
| cg05211189 | 0.417   | 0.698   | -0.281    | 3e-06            | NA                    | Hypomethylated in FP vs FN |
| cg03877829 | 0.224   | 0.566   | -0.342    | 3e-06            | NA                    | Hypomethylated in FP vs FN |
| cg03459617 | 0.489   | 0.760   | -0.271    | 3e-06            | DSPP                  | Hypomethylated in FP vs FN |
| cg21035669 | 0.433   | 0.777   | -0.344    | 3e-06            | NA                    | Hypomethylated in FP vs FN |
| cg03747657 | 0.408   | 0.751   | -0.342    | 3e-06            | NA                    | Hypomethylated in FP vs FN |
| cg09535027 | 0.468   | 0.808   | -0.340    | 3e-06            | NA                    | Hypomethylated in FP vs FN |
| cg25769889 | 0.281   | 0.601   | -0.320    | 3e-06            | NA                    | Hypomethylated in FP vs FN |
| cg15696462 | 0.503   | 0.813   | -0.310    | 3e-06            | NA                    | Hypomethylated in FP vs FN |
| cg17476910 | 0.400   | 0.719   | -0.319    | 3e-06            | NA                    | Hypomethylated in FP vs FN |

### Supplementary Table 7 (continued)

| Probe      | FP.mean | FN.mean | Mean.diff | Adjusted.P.value | Promoter.related.gene | Category                   |
|------------|---------|---------|-----------|------------------|-----------------------|----------------------------|
| cg06142621 | 0.396   | 0.693   | -0.297    | 3e-06            | HEPACAM               | Hypomethylated in FP vs FN |
| cg23381232 | 0.331   | 0.713   | -0.382    | 3e-06            | NA                    | Hypomethylated in FP vs FN |
| cg07243405 | 0.457   | 0.759   | -0.302    | 3e-06            | C7orf20               | Hypomethylated in FP vs FN |
| cg01055075 | 0.566   | 0.839   | -0.273    | 3e-06            | NA                    | Hypomethylated in FP vs FN |
| cg15769475 | 0.561   | 0.843   | -0.282    | 3e-06            | NA                    | Hypomethylated in FP vs FN |
| cg04366815 | 0.296   | 0.617   | -0.321    | 3e-06            | NA                    | Hypomethylated in FP vs FN |
| cg06060731 | 0.484   | 0.801   | -0.317    | 3e-06            | REEP1                 | Hypomethylated in FP vs FN |
| cg27431625 | 0.530   | 0.782   | -0.252    | 3e-06            | NA                    | Hypomethylated in FP vs FN |
| cg16262614 | 0.065   | 0.466   | -0.402    | 3e-06            | TF                    | Hypomethylated in FP vs FN |
| cg13210578 | 0.367   | 0.747   | -0.380    | 3e-06            | NA                    | Hypomethylated in FP vs FN |
| cg17732044 | 0.115   | 0.487   | -0.371    | 3e-06            | PEX11A                | Hypomethylated in FP vs FN |
| cg03120102 | 0.386   | 0.720   | -0.333    | 3e-06            | NA                    | Hypomethylated in FP vs FN |
| cg18363035 | 0.313   | 0.653   | -0.340    | 3e-06            | GJB6                  | Hypomethylated in FP vs FN |
| cg09701700 | 0.163   | 0.435   | -0.272    | 3e-06            | MIR146B               | Hypomethylated in FP vs FN |
| cg00236831 | 0.146   | 0.628   | -0.481    | 3e-06            | ATF7IP                | Hypomethylated in FP vs FN |
| cg04717847 | 0.459   | 0.735   | -0.276    | 3e-06            | SPTBN5                | Hypomethylated in FP vs FN |
| cg21748874 | 0.516   | 0.776   | -0.260    | 3e-06            | NA                    | Hypomethylated in FP vs FN |
| cg12232463 | 0.244   | 0.542   | -0.299    | 3e-06            | NA                    | Hypomethylated in FP vs FN |
| cg09590377 | 0.234   | 0.641   | -0.407    | 3e-06            | NA                    | Hypomethylated in FP vs FN |
| cg11424198 | 0.129   | 0.475   | -0.346    | 3e-06            | NA                    | Hypomethylated in FP vs FN |
| cg18575221 | 0.528   | 0.787   | -0.258    | 3e-06            | NA                    | Hypomethylated in FP vs FN |
| cg27287305 | 0.467   | 0.726   | -0.259    | 3e-06            | NA                    | Hypomethylated in FP vs FN |
| cg11019771 | 0.456   | 0.807   | -0.351    | 3e-06            | NA                    | Hypomethylated in FP vs FN |
| cg20515672 | 0.441   | 0.710   | -0.269    | 3e-06            | NA                    | Hypomethylated in FP vs FN |
| cg18144692 | 0.311   | 0.665   | -0.353    | 3e-06            | NA                    | Hypomethylated in FP vs FN |

### Supplementary Table 7 (continued)

| Probe      | FP.mean | FN.mean | Mean.diff | Adjusted.P.value | Promoter.related.gene | Category                   |
|------------|---------|---------|-----------|------------------|-----------------------|----------------------------|
| cg09344348 | 0.482   | 0.825   | -0.343    | 3e-06            | NA                    | Hypomethylated in FP vs FN |
| cg15410418 | 0.436   | 0.759   | -0.322    | 3e-06            | NA                    | Hypomethylated in FP vs FN |
| cg25949363 | 0.272   | 0.560   | -0.288    | 3e-06            | NA                    | Hypomethylated in FP vs FN |
| cg05642264 | 0.369   | 0.707   | -0.338    | 3e-06            | SDK1                  | Hypomethylated in FP vs FN |
| cg16087679 | 0.385   | 0.669   | -0.285    | 3e-06            | NA                    | Hypomethylated in FP vs FN |
| cg21983192 | 0.342   | 0.710   | -0.369    | 3e-06            | NA                    | Hypomethylated in FP vs FN |
| cg09695430 | 0.268   | 0.672   | -0.405    | 3e-06            | NA                    | Hypomethylated in FP vs FN |
| cg06628999 | 0.524   | 0.791   | -0.267    | 3e-06            | NA                    | Hypomethylated in FP vs FN |
| cg17778888 | 0.361   | 0.783   | -0.422    | 3e-06            | NA                    | Hypomethylated in FP vs FN |
| cg03655692 | 0.424   | 0.741   | -0.318    | 3e-06            | NA                    | Hypomethylated in FP vs FN |
| cg01941881 | 0.509   | 0.782   | -0.273    | 3e-06            | NA                    | Hypomethylated in FP vs FN |
| cg17788832 | 0.272   | 0.526   | -0.254    | 3e-06            | NA                    | Hypomethylated in FP vs FN |
| cg24512303 | 0.408   | 0.743   | -0.335    | 3e-06            | HNF4G                 | Hypomethylated in FP vs FN |
| cg22660196 | 0.563   | 0.835   | -0.272    | 4e-06            | NA                    | Hypomethylated in FP vs FN |
| cg14253635 | 0.447   | 0.803   | -0.356    | 4e-06            | NA                    | Hypomethylated in FP vs FN |
| cg27143142 | 0.516   | 0.816   | -0.300    | 4e-06            | NA                    | Hypomethylated in FP vs FN |
| cg18220920 | 0.438   | 0.721   | -0.283    | 4e-06            | NA                    | Hypomethylated in FP vs FN |
| cg24332577 | 0.452   | 0.716   | -0.264    | 4e-06            | SALL4                 | Hypomethylated in FP vs FN |
| cg04585389 | 0.459   | 0.732   | -0.273    | 4e-06            | NA                    | Hypomethylated in FP vs FN |
| cg13152535 | 0.234   | 0.549   | -0.315    | 4e-06            | CLEC11A               | Hypomethylated in FP vs FN |
| cg03687345 | 0.208   | 0.581   | -0.373    | 4e-06            | NA                    | Hypomethylated in FP vs FN |
| cg14140881 | 0.171   | 0.606   | -0.435    | 4e-06            | EFCAB10               | Hypomethylated in FP vs FN |
| cg22855441 | 0.460   | 0.769   | -0.309    | 4e-06            | NA                    | Hypomethylated in FP vs FN |
| cg24889466 | 0.193   | 0.570   | -0.377    | 4e-06            | NA                    | Hypomethylated in FP vs FN |
| cg00284179 | 0.464   | 0.760   | -0.296    | 4e-06            | NA                    | Hypomethylated in FP vs FN |

### Supplementary Table 7 (continued)

| Probe      | FP.mean | FN.mean | Mean.diff | Adjusted.P.value | Promoter.related.gene | Category                   |
|------------|---------|---------|-----------|------------------|-----------------------|----------------------------|
| cg14503063 | 0.444   | 0.750   | -0.306    | 4e-06            | NA                    | Hypomethylated in FP vs FN |
| cg25309343 | 0.401   | 0.664   | -0.263    | 4e-06            | CLEC11A               | Hypomethylated in FP vs FN |
| cg26104206 | 0.259   | 0.525   | -0.266    | 4e-06            | NA                    | Hypomethylated in FP vs FN |
| cg16204818 | 0.148   | 0.562   | -0.414    | 4e-06            | NA                    | Hypomethylated in FP vs FN |
| cg18282849 | 0.286   | 0.657   | -0.371    | 4e-06            | CCDC81                | Hypomethylated in FP vs FN |
| cg15985891 | 0.381   | 0.743   | -0.363    | 4e-06            | NA                    | Hypomethylated in FP vs FN |
| cg16819272 | 0.421   | 0.759   | -0.338    | 4e-06            | NA                    | Hypomethylated in FP vs FN |
| cg07209977 | 0.466   | 0.760   | -0.294    | 4e-06            | NA                    | Hypomethylated in FP vs FN |
| cg16175263 | 0.252   | 0.619   | -0.367    | 4e-06            | TNFRSF10C             | Hypomethylated in FP vs FN |
| cg18069174 | 0.637   | 0.907   | -0.270    | 4e-06            | NA                    | Hypomethylated in FP vs FN |
| cg02049217 | 0.371   | 0.675   | -0.304    | 4e-06            | NA                    | Hypomethylated in FP vs FN |
| cg22167400 | 0.370   | 0.655   | -0.285    | 4e-06            | NA                    | Hypomethylated in FP vs FN |
| cg07101354 | 0.339   | 0.657   | -0.318    | 4e-06            | NA                    | Hypomethylated in FP vs FN |
| cg05943254 | 0.357   | 0.640   | -0.283    | 4e-06            | NA                    | Hypomethylated in FP vs FN |
| cg07754347 | 0.397   | 0.678   | -0.281    | 4e-06            | NA                    | Hypomethylated in FP vs FN |
| cg03150622 | 0.246   | 0.710   | -0.465    | 4e-06            | EPHA1                 | Hypomethylated in FP vs FN |
| cg08435240 | 0.436   | 0.796   | -0.360    | 4e-06            | KCNJ15                | Hypomethylated in FP vs FN |
| cg07089275 | 0.421   | 0.732   | -0.312    | 4e-06            | LOC146336_SSTR5       | Hypomethylated in FP vs FN |
| cg03222632 | 0.433   | 0.747   | -0.314    | 4e-06            | NA                    | Hypomethylated in FP vs FN |
| cg07627452 | 0.388   | 0.671   | -0.283    | 4e-06            | NA                    | Hypomethylated in FP vs FN |
| cg15837280 | 0.485   | 0.765   | -0.280    | 4e-06            | NA                    | Hypomethylated in FP vs FN |
| cg24325551 | 0.358   | 0.644   | -0.286    | 4e-06            | NA                    | Hypomethylated in FP vs FN |
| cg09980176 | 0.178   | 0.509   | -0.332    | 4e-06            | NA                    | Hypomethylated in FP vs FN |
| cg08387293 | 0.565   | 0.823   | -0.258    | 4e-06            | NA                    | Hypomethylated in FP vs FN |
| cg20204986 | 0.309   | 0.708   | -0.399    | 4e-06            | NA                    | Hypomethylated in FP vs FN |

### Supplementary Table 7 (continued)

| Probe      | FP.mean | FN.mean | Mean.diff | Adjusted.P.value | Promoter.related.gene | Category                   |
|------------|---------|---------|-----------|------------------|-----------------------|----------------------------|
| cg15117372 | 0.241   | 0.608   | -0.367    | 4e-06            | SLC26A8               | Hypomethylated in FP vs FN |
| cg17758363 | 0.328   | 0.622   | -0.294    | 4e-06            | NA                    | Hypomethylated in FP vs FN |
| cg20186473 | 0.425   | 0.734   | -0.309    | 4e-06            | NA                    | Hypomethylated in FP vs FN |
| cg23696864 | 0.547   | 0.836   | -0.289    | 4e-06            | NA                    | Hypomethylated in FP vs FN |
| cg15057138 | 0.443   | 0.804   | -0.360    | 4e-06            | NA                    | Hypomethylated in FP vs FN |
| cg01754525 | 0.277   | 0.673   | -0.397    | 4e-06            | NA                    | Hypomethylated in FP vs FN |
| cg25510823 | 0.529   | 0.813   | -0.284    | 4e-06            | NA                    | Hypomethylated in FP vs FN |
| cg01935096 | 0.318   | 0.669   | -0.351    | 4e-06            | NA                    | Hypomethylated in FP vs FN |
| cg27042523 | 0.331   | 0.600   | -0.270    | 4e-06            | NA                    | Hypomethylated in FP vs FN |
| cg07701567 | 0.500   | 0.811   | -0.311    | 4e-06            | NA                    | Hypomethylated in FP vs FN |
| cg01618806 | 0.495   | 0.808   | -0.312    | 4e-06            | NA                    | Hypomethylated in FP vs FN |
| cg21227610 | 0.129   | 0.482   | -0.353    | 4e-06            | NA                    | Hypomethylated in FP vs FN |
| cg24156181 | 0.440   | 0.738   | -0.298    | 4e-06            | NA                    | Hypomethylated in FP vs FN |
| cg16894819 | 0.403   | 0.695   | -0.292    | 4e-06            | NA                    | Hypomethylated in FP vs FN |
| cg06117072 | 0.259   | 0.653   | -0.394    | 4e-06            | NA                    | Hypomethylated in FP vs FN |
| cg06809439 | 0.424   | 0.707   | -0.283    | 4e-06            | NA                    | Hypomethylated in FP vs FN |
| cg14145801 | 0.208   | 0.625   | -0.417    | 4e-06            | ZSWIM2                | Hypomethylated in FP vs FN |
| cg03066577 | 0.100   | 0.531   | -0.432    | 4e-06            | C3orf55               | Hypomethylated in FP vs FN |
| cg12461487 | 0.507   | 0.790   | -0.283    | 4e-06            | NA                    | Hypomethylated in FP vs FN |
| cg15996984 | 0.377   | 0.684   | -0.307    | 4e-06            | NA                    | Hypomethylated in FP vs FN |
| cg12984948 | 0.451   | 0.717   | -0.266    | 4e-06            | NA                    | Hypomethylated in FP vs FN |
| cg01930756 | 0.420   | 0.715   | -0.295    | 4e-06            | NA                    | Hypomethylated in FP vs FN |
| cg14406134 | 0.568   | 0.846   | -0.278    | 4e-06            | NA                    | Hypomethylated in FP vs FN |
| cg15414638 | 0.314   | 0.734   | -0.420    | 4e-06            | NA                    | Hypomethylated in FP vs FN |
| cg23676151 | 0.209   | 0.497   | -0.288    | 4e-06            | NA                    | Hypomethylated in FP vs FN |

### Supplementary Table 7 (continued)

| Probe      | FP.mean | FN.mean | Mean.diff | Adjusted.P.value | Promoter.related.gene | Category                   |
|------------|---------|---------|-----------|------------------|-----------------------|----------------------------|
| cg01621390 | 0.327   | 0.661   | -0.334    | 4e-06            | NA                    | Hypomethylated in FP vs FN |
| cg04757411 | 0.292   | 0.649   | -0.358    | 4e-06            | NA                    | Hypomethylated in FP vs FN |
| cg12279138 | 0.477   | 0.737   | -0.260    | 4e-06            | DEGS1                 | Hypomethylated in FP vs FN |
| cg19561607 | 0.369   | 0.621   | -0.252    | 4e-06            | BCAT1                 | Hypomethylated in FP vs FN |
| cg19854437 | 0.375   | 0.662   | -0.287    | 4e-06            | NA                    | Hypomethylated in FP vs FN |
| cg07094075 | 0.407   | 0.716   | -0.309    | 4e-06            | TUSC5                 | Hypomethylated in FP vs FN |
| cg17132124 | 0.182   | 0.574   | -0.392    | 4e-06            | KLHDC9                | Hypomethylated in FP vs FN |
| cg20774676 | 0.375   | 0.691   | -0.317    | 4e-06            | NA                    | Hypomethylated in FP vs FN |
| cg04635364 | 0.461   | 0.746   | -0.285    | 4e-06            | NA                    | Hypomethylated in FP vs FN |
| cg06771126 | 0.266   | 0.623   | -0.357    | 4e-06            | HOPX                  | Hypomethylated in FP vs FN |
| cg14720773 | 0.462   | 0.761   | -0.299    | 4e-06            | NA                    | Hypomethylated in FP vs FN |
| cg05780722 | 0.570   | 0.822   | -0.253    | 4e-06            | NA                    | Hypomethylated in FP vs FN |
| cg13336662 | 0.263   | 0.597   | -0.335    | 4e-06            | NA                    | Hypomethylated in FP vs FN |
| cg00464946 | 0.235   | 0.567   | -0.332    | 4e-06            | NA                    | Hypomethylated in FP vs FN |
| cg00565679 | 0.562   | 0.816   | -0.254    | 4e-06            | NA                    | Hypomethylated in FP vs FN |
| cg10757144 | 0.385   | 0.722   | -0.338    | 4e-06            | PCDHB15               | Hypomethylated in FP vs FN |
| cg05287437 | 0.455   | 0.723   | -0.269    | 4e-06            | GALNTL2               | Hypomethylated in FP vs FN |
| cg13922124 | 0.200   | 0.598   | -0.399    | 4e-06            | EFCAB10               | Hypomethylated in FP vs FN |
| cg19843353 | 0.507   | 0.776   | -0.269    | 4e-06            | TRIM41                | Hypomethylated in FP vs FN |
| cg27028923 | 0.167   | 0.495   | -0.329    | 4e-06            | NA                    | Hypomethylated in FP vs FN |
| cg05404698 | 0.375   | 0.798   | -0.423    | 4e-06            | NA                    | Hypomethylated in FP vs FN |
| cg04087271 | 0.286   | 0.622   | -0.336    | 4e-06            | CDA                   | Hypomethylated in FP vs FN |
| cg27472176 | 0.397   | 0.721   | -0.324    | 4e-06            | NA                    | Hypomethylated in FP vs FN |
| cg15577373 | 0.189   | 0.482   | -0.293    | 4e-06            | NA                    | Hypomethylated in FP vs FN |
| cg15947910 | 0.419   | 0.690   | -0.271    | 4e-06            | NA                    | Hypomethylated in FP vs FN |



### Supplementary Table 7 (continued)

| Probe      | FP.mean | FN.mean | Mean.diff | Adjusted.P.value | Promoter.related.gene | Category                   |
|------------|---------|---------|-----------|------------------|-----------------------|----------------------------|
| cg21108085 | 0.180   | 0.449   | -0.269    | 4e-06            | NA                    | Hypomethylated in FP vs FN |
| cg24454243 | 0.209   | 0.566   | -0.357    | 4e-06            | EFCAB10               | Hypomethylated in FP vs FN |
| cg24879335 | 0.152   | 0.548   | -0.396    | 4e-06            | TF                    | Hypomethylated in FP vs FN |
| cg16966315 | 0.171   | 0.571   | -0.400    | 4e-06            | NA                    | Hypomethylated in FP vs FN |
| cg14482712 | 0.452   | 0.731   | -0.279    | 4e-06            | NA                    | Hypomethylated in FP vs FN |
| cg15557459 | 0.438   | 0.705   | -0.267    | 4e-06            | NA                    | Hypomethylated in FP vs FN |
| cg02706575 | 0.513   | 0.772   | -0.259    | 4e-06            | CCL13                 | Hypomethylated in FP vs FN |
| cg26540315 | 0.347   | 0.686   | -0.339    | 4e-06            | NA                    | Hypomethylated in FP vs FN |
| cg12060472 | 0.283   | 0.712   | -0.430    | 4e-06            | ECHDC2                | Hypomethylated in FP vs FN |
| cg21783047 | 0.327   | 0.600   | -0.274    | 4e-06            | NA                    | Hypomethylated in FP vs FN |
| cg03476860 | 0.255   | 0.684   | -0.429    | 4e-06            | NA                    | Hypomethylated in FP vs FN |
| cg25539045 | 0.121   | 0.642   | -0.521    | 4e-06            | FOXI2                 | Hypomethylated in FP vs FN |
| cg27634115 | 0.556   | 0.809   | -0.253    | 4e-06            | NA                    | Hypomethylated in FP vs FN |
| cg25885358 | 0.174   | 0.426   | -0.252    | 4e-06            | NA                    | Hypomethylated in FP vs FN |
| cg12252865 | 0.244   | 0.537   | -0.293    | 4e-06            | HDAC11                | Hypomethylated in FP vs FN |
| cg13003178 | 0.388   | 0.712   | -0.324    | 4e-06            | NA                    | Hypomethylated in FP vs FN |
| cg11659317 | 0.200   | 0.556   | -0.356    | 4e-06            | PLEKHH2               | Hypomethylated in FP vs FN |
| cg01663970 | 0.478   | 0.760   | -0.282    | 4e-06            | NA                    | Hypomethylated in FP vs FN |
| cg02032282 | 0.416   | 0.688   | -0.272    | 4e-06            | NA                    | Hypomethylated in FP vs FN |
| cg13316854 | 0.295   | 0.615   | -0.320    | 4e-06            | HOXD3                 | Hypomethylated in FP vs FN |
| cg00425918 | 0.211   | 0.583   | -0.372    | 4e-06            | NA                    | Hypomethylated in FP vs FN |
| cg18031661 | 0.370   | 0.721   | -0.351    | 4e-06            | NA                    | Hypomethylated in FP vs FN |
| cg19494588 | 0.391   | 0.690   | -0.299    | 4e-06            | NA                    | Hypomethylated in FP vs FN |
| cg07185181 | 0.576   | 0.847   | -0.271    | 4e-06            | NA                    | Hypomethylated in FP vs FN |
| cg09834343 | 0.358   | 0.712   | -0.354    | 4e-06            | NA                    | Hypomethylated in FP vs FN |

### Supplementary Table 7 (continued)

| Probe      | FP.mean | FN.mean | Mean.diff | Adjusted.P.value | Promoter.related.gene | Category                   |
|------------|---------|---------|-----------|------------------|-----------------------|----------------------------|
| cg24942416 | 0.448   | 0.781   | -0.333    | 4e-06            | NA                    | Hypomethylated in FP vs FN |
| cg08835113 | 0.205   | 0.599   | -0.394    | 4e-06            | NA                    | Hypomethylated in FP vs FN |
| cg20832020 | 0.412   | 0.706   | -0.294    | 4e-06            | TIGIT                 | Hypomethylated in FP vs FN |
| cg07960624 | 0.300   | 0.659   | -0.359    | 4e-06            | NA                    | Hypomethylated in FP vs FN |
| cg13280882 | 0.302   | 0.672   | -0.370    | 4e-06            | NA                    | Hypomethylated in FP vs FN |
| cg00210186 | 0.522   | 0.801   | -0.279    | 4e-06            | MCART1                | Hypomethylated in FP vs FN |
| cg09110274 | 0.396   | 0.671   | -0.275    | 4e-06            | CACNA2D4              | Hypomethylated in FP vs FN |
| cg13830794 | 0.500   | 0.762   | -0.262    | 4e-06            | NA                    | Hypomethylated in FP vs FN |
| cg26414257 | 0.236   | 0.552   | -0.316    | 4e-06            | NA                    | Hypomethylated in FP vs FN |
| cg15239904 | 0.341   | 0.657   | -0.316    | 4e-06            | NA                    | Hypomethylated in FP vs FN |
| cg22514756 | 0.549   | 0.806   | -0.257    | 4e-06            | NA                    | Hypomethylated in FP vs FN |
| cg00119279 | 0.268   | 0.528   | -0.260    | 4e-06            | NA                    | Hypomethylated in FP vs FN |
| cg06217323 | 0.561   | 0.840   | -0.280    | 4e-06            | NA                    | Hypomethylated in FP vs FN |
| cg16068038 | 0.482   | 0.747   | -0.265    | 4e-06            | C15orf28              | Hypomethylated in FP vs FN |
| cg00524708 | 0.228   | 0.637   | -0.410    | 4e-06            | NA                    | Hypomethylated in FP vs FN |
| cg12426234 | 0.085   | 0.340   | -0.255    | 4e-06            | NCAM2                 | Hypomethylated in FP vs FN |
| cg22579114 | 0.317   | 0.611   | -0.294    | 4e-06            | NA                    | Hypomethylated in FP vs FN |
| cg03695871 | 0.541   | 0.834   | -0.293    | 4e-06            | DKFZp761E198          | Hypomethylated in FP vs FN |
| cg00366236 | 0.403   | 0.690   | -0.287    | 4e-06            | NA                    | Hypomethylated in FP vs FN |
| cg24667326 | 0.516   | 0.787   | -0.271    | 4e-06            | SPRR3                 | Hypomethylated in FP vs FN |
| cg18565268 | 0.293   | 0.581   | -0.288    | 4e-06            | NA                    | Hypomethylated in FP vs FN |
| cg01416043 | 0.645   | 0.914   | -0.269    | 4e-06            | KCNF1                 | Hypomethylated in FP vs FN |
| cg05386726 | 0.390   | 0.718   | -0.327    | 4e-06            | NA                    | Hypomethylated in FP vs FN |
| cg16501028 | 0.375   | 0.705   | -0.330    | 4e-06            | NA                    | Hypomethylated in FP vs FN |
| cg09951047 | 0.361   | 0.731   | -0.370    | 4e-06            | NA                    | Hypomethylated in FP vs FN |

### Supplementary Table 7 (continued)

| Probe      | FP.mean | FN.mean | Mean.diff | Adjusted.P.value | Promoter.related.gene | Category                   |
|------------|---------|---------|-----------|------------------|-----------------------|----------------------------|
| cg27369542 | 0.421   | 0.733   | -0.312    | 4e-06            | NA                    | Hypomethylated in FP vs FN |
| cg01244601 | 0.527   | 0.808   | -0.281    | 5e-06            | NA                    | Hypomethylated in FP vs FN |
| cg00790395 | 0.212   | 0.618   | -0.406    | 5e-06            | NA                    | Hypomethylated in FP vs FN |
| cg07800658 | 0.263   | 0.530   | -0.267    | 5e-06            | NA                    | Hypomethylated in FP vs FN |
| cg12529228 | 0.312   | 0.710   | -0.398    | 5e-06            | NHLH1                 | Hypomethylated in FP vs FN |
| cg00916635 | 0.409   | 0.685   | -0.276    | 5e-06            | PTPN22                | Hypomethylated in FP vs FN |
| cg04456238 | 0.335   | 0.757   | -0.422    | 5e-06            | NA                    | Hypomethylated in FP vs FN |
| cg24850121 | 0.325   | 0.687   | -0.362    | 5e-06            | NA                    | Hypomethylated in FP vs FN |
| cg09999194 | 0.094   | 0.577   | -0.483    | 5e-06            | NA                    | Hypomethylated in FP vs FN |
| cg07609372 | 0.341   | 0.622   | -0.281    | 5e-06            | ASB10                 | Hypomethylated in FP vs FN |
| cg09333631 | 0.283   | 0.605   | -0.322    | 5e-06            | KIF15                 | Hypomethylated in FP vs FN |
| cg09862303 | 0.330   | 0.626   | -0.297    | 5e-06            | NA                    | Hypomethylated in FP vs FN |
| cg06649737 | 0.342   | 0.716   | -0.375    | 5e-06            | KLHDC9                | Hypomethylated in FP vs FN |
| cg00837398 | 0.246   | 0.506   | -0.260    | 5e-06            | ZNF783                | Hypomethylated in FP vs FN |
| cg05217312 | 0.362   | 0.624   | -0.263    | 5e-06            | NA                    | Hypomethylated in FP vs FN |
| cg27000831 | 0.450   | 0.780   | -0.330    | 5e-06            | CCL8                  | Hypomethylated in FP vs FN |
| cg10124548 | 0.266   | 0.617   | -0.351    | 5e-06            | NA                    | Hypomethylated in FP vs FN |
| cg00496004 | 0.243   | 0.524   | -0.281    | 5e-06            | ST14                  | Hypomethylated in FP vs FN |
| cg27140295 | 0.454   | 0.754   | -0.301    | 5e-06            | AQP6                  | Hypomethylated in FP vs FN |
| cg12518535 | 0.302   | 0.566   | -0.264    | 5e-06            | NA                    | Hypomethylated in FP vs FN |
| cg14130985 | 0.276   | 0.642   | -0.366    | 5e-06            | NA                    | Hypomethylated in FP vs FN |
| cg25429672 | 0.414   | 0.735   | -0.321    | 5e-06            | NA                    | Hypomethylated in FP vs FN |
| cg13209613 | 0.212   | 0.509   | -0.297    | 5e-06            | NA                    | Hypomethylated in FP vs FN |
| cg15756227 | 0.112   | 0.398   | -0.285    | 5e-06            | NA                    | Hypomethylated in FP vs FN |
| cg12192566 | 0.271   | 0.522   | -0.251    | 5e-06            | NA                    | Hypomethylated in FP vs FN |

### Supplementary Table 7 (continued)

| Probe      | FP.mean | FN.mean | Mean.diff | Adjusted.P.value | Promoter.related.gene | Category                   |
|------------|---------|---------|-----------|------------------|-----------------------|----------------------------|
| cg11009335 | 0.174   | 0.489   | -0.315    | 5e-06            | GALNT3                | Hypomethylated in FP vs FN |
| cg20943084 | 0.163   | 0.486   | -0.322    | 5e-06            | CD14                  | Hypomethylated in FP vs FN |
| cg13655082 | 0.155   | 0.602   | -0.447    | 5e-06            | NA                    | Hypomethylated in FP vs FN |
| cg04563671 | 0.468   | 0.751   | -0.283    | 5e-06            | NA                    | Hypomethylated in FP vs FN |
| cg20572816 | 0.202   | 0.515   | -0.312    | 5e-06            | NA                    | Hypomethylated in FP vs FN |
| cg17586345 | 0.491   | 0.797   | -0.307    | 5e-06            | NA                    | Hypomethylated in FP vs FN |
| cg11231069 | 0.341   | 0.681   | -0.341    | 5e-06            | NA                    | Hypomethylated in FP vs FN |
| cg05347845 | 0.075   | 0.513   | -0.438    | 5e-06            | ACTA1                 | Hypomethylated in FP vs FN |
| cg25745246 | 0.297   | 0.710   | -0.412    | 5e-06            | NA                    | Hypomethylated in FP vs FN |
| cg23311929 | 0.284   | 0.614   | -0.330    | 5e-06            | NA                    | Hypomethylated in FP vs FN |
| cg19777396 | 0.275   | 0.609   | -0.334    | 5e-06            | NA                    | Hypomethylated in FP vs FN |
| cg00256593 | 0.335   | 0.598   | -0.263    | 5e-06            | ADCYAP1R1             | Hypomethylated in FP vs FN |
| cg02326301 | 0.390   | 0.684   | -0.294    | 5e-06            | NA                    | Hypomethylated in FP vs FN |
| cg24154937 | 0.536   | 0.794   | -0.258    | 5e-06            | KCNA5                 | Hypomethylated in FP vs FN |
| cg26883161 | 0.311   | 0.610   | -0.299    | 5e-06            | NA                    | Hypomethylated in FP vs FN |
| cg11104474 | 0.239   | 0.591   | -0.352    | 5e-06            | NA                    | Hypomethylated in FP vs FN |
| cg23594461 | 0.372   | 0.681   | -0.309    | 5e-06            | NA                    | Hypomethylated in FP vs FN |
| cg07269138 | 0.311   | 0.669   | -0.358    | 5e-06            | P2RY14                | Hypomethylated in FP vs FN |
| cg17453456 | 0.305   | 0.588   | -0.283    | 5e-06            | NA                    | Hypomethylated in FP vs FN |
| cg10620680 | 0.455   | 0.761   | -0.307    | 5e-06            | NA                    | Hypomethylated in FP vs FN |
| cg13255629 | 0.543   | 0.813   | -0.270    | 5e-06            | MEPE                  | Hypomethylated in FP vs FN |
| cg12435059 | 0.409   | 0.670   | -0.261    | 5e-06            | NA                    | Hypomethylated in FP vs FN |
| cg15073708 | 0.293   | 0.555   | -0.262    | 5e-06            | NA                    | Hypomethylated in FP vs FN |
| cg05621218 | 0.445   | 0.812   | -0.366    | 5e-06            | NA                    | Hypomethylated in FP vs FN |
| cg27390271 | 0.420   | 0.726   | -0.306    | 5e-06            | NA                    | Hypomethylated in FP vs FN |

### Supplementary Table 7 (continued)

| Probe      | FP.mean | FN.mean | Mean.diff | Adjusted.P.value | Promoter.related.gene | Category                   |
|------------|---------|---------|-----------|------------------|-----------------------|----------------------------|
| cg05452406 | 0.137   | 0.580   | -0.442    | 5e-06            | NA                    | Hypomethylated in FP vs FN |
| cg07283816 | 0.477   | 0.778   | -0.301    | 5e-06            | NA                    | Hypomethylated in FP vs FN |
| cg14409940 | 0.356   | 0.652   | -0.296    | 5e-06            | CIZ1                  | Hypomethylated in FP vs FN |
| cg02565878 | 0.330   | 0.656   | -0.325    | 5e-06            | NA                    | Hypomethylated in FP vs FN |
| cg15803018 | 0.409   | 0.750   | -0.341    | 5e-06            | NA                    | Hypomethylated in FP vs FN |
| cg23130369 | 0.547   | 0.814   | -0.266    | 5e-06            | NA                    | Hypomethylated in FP vs FN |
| cg05220092 | 0.154   | 0.424   | -0.270    | 5e-06            | NA                    | Hypomethylated in FP vs FN |
| cg23889772 | 0.253   | 0.579   | -0.326    | 5e-06            | NA                    | Hypomethylated in FP vs FN |
| cg05276226 | 0.457   | 0.739   | -0.282    | 5e-06            | ADAM18                | Hypomethylated in FP vs FN |
| cg05106502 | 0.305   | 0.676   | -0.371    | 5e-06            | NA                    | Hypomethylated in FP vs FN |
| cg04884612 | 0.350   | 0.646   | -0.295    | 5e-06            | NA                    | Hypomethylated in FP vs FN |
| cg09822192 | 0.259   | 0.631   | -0.372    | 5e-06            | NA                    | Hypomethylated in FP vs FN |
| cg13151527 | 0.517   | 0.805   | -0.288    | 5e-06            | NA                    | Hypomethylated in FP vs FN |
| cg06530563 | 0.391   | 0.672   | -0.281    | 5e-06            | NA                    | Hypomethylated in FP vs FN |
| cg06644721 | 0.505   | 0.798   | -0.293    | 5e-06            | NA                    | Hypomethylated in FP vs FN |
| cg14448169 | 0.271   | 0.656   | -0.385    | 5e-06            | WNT16                 | Hypomethylated in FP vs FN |
| cg06213468 | 0.282   | 0.687   | -0.405    | 5e-06            | FOXI2                 | Hypomethylated in FP vs FN |
| cg12064372 | 0.216   | 0.652   | -0.436    | 5e-06            | NA                    | Hypomethylated in FP vs FN |
| cg03976856 | 0.225   | 0.509   | -0.284    | 5e-06            | NA                    | Hypomethylated in FP vs FN |
| cg17511968 | 0.211   | 0.535   | -0.324    | 5e-06            | NA                    | Hypomethylated in FP vs FN |
| cg11564670 | 0.558   | 0.809   | -0.251    | 5e-06            | NA                    | Hypomethylated in FP vs FN |
| cg11058904 | 0.381   | 0.773   | -0.392    | 5e-06            | NA                    | Hypomethylated in FP vs FN |
| cg03033111 | 0.296   | 0.617   | -0.321    | 5e-06            | PDE6B                 | Hypomethylated in FP vs FN |
| cg26070604 | 0.480   | 0.732   | -0.251    | 5e-06            | NA                    | Hypomethylated in FP vs FN |
| cg07835844 | 0.121   | 0.495   | -0.373    | 5e-06            | NA                    | Hypomethylated in FP vs FN |

### Supplementary Table 7 (continued)

| Probe      | FP.mean | FN.mean | Mean.diff | Adjusted.P.value | Promoter.related.gene | Category                   |
|------------|---------|---------|-----------|------------------|-----------------------|----------------------------|
| cg04655136 | 0.459   | 0.779   | -0.320    | 5e-06            | NA                    | Hypomethylated in FP vs FN |
| cg27097923 | 0.347   | 0.627   | -0.280    | 5e-06            | TPBG                  | Hypomethylated in FP vs FN |
| cg02852847 | 0.441   | 0.698   | -0.257    | 5e-06            | NA                    | Hypomethylated in FP vs FN |
| cg26556196 | 0.278   | 0.643   | -0.365    | 5e-06            | NA                    | Hypomethylated in FP vs FN |
| cg08766770 | 0.322   | 0.592   | -0.270    | 5e-06            | NA                    | Hypomethylated in FP vs FN |
| cg10144924 | 0.470   | 0.755   | -0.285    | 5e-06            | NA                    | Hypomethylated in FP vs FN |
| cg08870143 | 0.572   | 0.853   | -0.282    | 5e-06            | NA                    | Hypomethylated in FP vs FN |
| cg08611163 | 0.150   | 0.601   | -0.450    | 5e-06            | RNF207                | Hypomethylated in FP vs FN |
| cg01654560 | 0.453   | 0.733   | -0.280    | 5e-06            | NTM                   | Hypomethylated in FP vs FN |
| cg22071067 | 0.120   | 0.458   | -0.338    | 5e-06            | NA                    | Hypomethylated in FP vs FN |
| cg08458745 | 0.413   | 0.683   | -0.270    | 5e-06            | NA                    | Hypomethylated in FP vs FN |
| cg24613691 | 0.307   | 0.685   | -0.377    | 5e-06            | NA                    | Hypomethylated in FP vs FN |
| cg17304457 | 0.368   | 0.673   | -0.306    | 5e-06            | NA                    | Hypomethylated in FP vs FN |
| cg23715830 | 0.118   | 0.500   | -0.382    | 5e-06            | NA                    | Hypomethylated in FP vs FN |
| cg19477689 | 0.437   | 0.747   | -0.310    | 5e-06            | NA                    | Hypomethylated in FP vs FN |
| cg26148020 | 0.428   | 0.775   | -0.348    | 5e-06            | NA                    | Hypomethylated in FP vs FN |
| cg27631256 | 0.220   | 0.558   | -0.338    | 5e-06            | TNFSF8                | Hypomethylated in FP vs FN |
| cg05849612 | 0.369   | 0.670   | -0.301    | 5e-06            | NA                    | Hypomethylated in FP vs FN |
| cg27275193 | 0.437   | 0.732   | -0.295    | 5e-06            | NA                    | Hypomethylated in FP vs FN |
| cg25906705 | 0.468   | 0.796   | -0.328    | 5e-06            | NA                    | Hypomethylated in FP vs FN |
| cg08234149 | 0.394   | 0.707   | -0.313    | 5e-06            | NA                    | Hypomethylated in FP vs FN |
| cg05234151 | 0.540   | 0.803   | -0.263    | 5e-06            | NA                    | Hypomethylated in FP vs FN |
| cg24870688 | 0.333   | 0.743   | -0.410    | 5e-06            | NA                    | Hypomethylated in FP vs FN |
| cg05257275 | 0.498   | 0.762   | -0.264    | 5e-06            | DKFZp761E198          | Hypomethylated in FP vs FN |
| cg13603171 | 0.276   | 0.646   | -0.370    | 5e-06            | MOXD1                 | Hypomethylated in FP vs FN |

### Supplementary Table 7 (continued)

| Probe      | FP.mean | FN.mean | Mean.diff | Adjusted.P.value | Promoter.related.gene | Category                   |
|------------|---------|---------|-----------|------------------|-----------------------|----------------------------|
| cg09076334 | 0.189   | 0.584   | -0.395    | 5e-06            | NA                    | Hypomethylated in FP vs FN |
| cg07268431 | 0.467   | 0.749   | -0.283    | 5e-06            | NA                    | Hypomethylated in FP vs FN |
| cg09645818 | 0.293   | 0.577   | -0.284    | 5e-06            | NA                    | Hypomethylated in FP vs FN |
| cg25063707 | 0.412   | 0.702   | -0.290    | 5e-06            | NA                    | Hypomethylated in FP vs FN |
| cg08259083 | 0.399   | 0.716   | -0.317    | 5e-06            | NA                    | Hypomethylated in FP vs FN |
| cg00164997 | 0.377   | 0.661   | -0.284    | 5e-06            | NA                    | Hypomethylated in FP vs FN |
| cg16491668 | 0.417   | 0.727   | -0.310    | 5e-06            | NA                    | Hypomethylated in FP vs FN |
| cg09548780 | 0.168   | 0.435   | -0.267    | 5e-06            | NA                    | Hypomethylated in FP vs FN |
| cg25286579 | 0.576   | 0.840   | -0.264    | 5e-06            | NA                    | Hypomethylated in FP vs FN |
| cg11155489 | 0.262   | 0.616   | -0.354    | 5e-06            | NA                    | Hypomethylated in FP vs FN |
| cg07313162 | 0.342   | 0.612   | -0.270    | 5e-06            | NA                    | Hypomethylated in FP vs FN |
| cg25782229 | 0.289   | 0.669   | -0.380    | 5e-06            | NA                    | Hypomethylated in FP vs FN |
| cg04774364 | 0.355   | 0.663   | -0.308    | 5e-06            | NA                    | Hypomethylated in FP vs FN |
| cg00314943 | 0.468   | 0.730   | -0.262    | 5e-06            | ALPPL2                | Hypomethylated in FP vs FN |
| cg26188226 | 0.453   | 0.800   | -0.346    | 5e-06            | NA                    | Hypomethylated in FP vs FN |
| cg15143037 | 0.283   | 0.615   | -0.332    | 5e-06            | NA                    | Hypomethylated in FP vs FN |
| cg21979773 | 0.355   | 0.620   | -0.265    | 5e-06            | NA                    | Hypomethylated in FP vs FN |
| cg19811253 | 0.480   | 0.742   | -0.262    | 5e-06            | NA                    | Hypomethylated in FP vs FN |
| cg22708248 | 0.128   | 0.396   | -0.268    | 5e-06            | NPPC                  | Hypomethylated in FP vs FN |
| cg12444822 | 0.335   | 0.685   | -0.350    | 5e-06            | NA                    | Hypomethylated in FP vs FN |
| cg26388730 | 0.264   | 0.581   | -0.317    | 5e-06            | NA                    | Hypomethylated in FP vs FN |
| cg24950222 | 0.343   | 0.666   | -0.323    | 5e-06            | LYPD3                 | Hypomethylated in FP vs FN |
| cg04781796 | 0.374   | 0.778   | -0.405    | 5e-06            | NA                    | Hypomethylated in FP vs FN |
| cg11168687 | 0.410   | 0.684   | -0.273    | 5e-06            | NA                    | Hypomethylated in FP vs FN |
| cg05193369 | 0.228   | 0.534   | -0.306    | 5e-06            | NA                    | Hypomethylated in FP vs FN |

### Supplementary Table 7 (continued)

| Probe      | FP.mean | FN.mean | Mean.diff | Adjusted.P.value | Promoter.related.gene | Category                   |
|------------|---------|---------|-----------|------------------|-----------------------|----------------------------|
| cg22325828 | 0.350   | 0.682   | -0.332    | 5e-06            | LOC90586              | Hypomethylated in FP vs FN |
| cg14886572 | 0.185   | 0.453   | -0.268    | 5e-06            | NA                    | Hypomethylated in FP vs FN |
| cg07558734 | 0.437   | 0.724   | -0.287    | 5e-06            | NA                    | Hypomethylated in FP vs FN |
| cg01216877 | 0.508   | 0.794   | -0.286    | 5e-06            | NA                    | Hypomethylated in FP vs FN |
| cg18634560 | 0.500   | 0.812   | -0.311    | 5e-06            | NA                    | Hypomethylated in FP vs FN |
| cg14444650 | 0.481   | 0.740   | -0.258    | 5e-06            | NA                    | Hypomethylated in FP vs FN |
| cg14465237 | 0.377   | 0.675   | -0.297    | 5e-06            | CCDC73                | Hypomethylated in FP vs FN |
| cg15343463 | 0.479   | 0.802   | -0.323    | 5e-06            | NA                    | Hypomethylated in FP vs FN |
| cg16906641 | 0.485   | 0.803   | -0.317    | 5e-06            | NA                    | Hypomethylated in FP vs FN |
| cg22344631 | 0.434   | 0.743   | -0.309    | 5e-06            | NA                    | Hypomethylated in FP vs FN |
| cg26738010 | 0.341   | 0.599   | -0.258    | 5e-06            | CETN1                 | Hypomethylated in FP vs FN |
| cg04464446 | 0.502   | 0.808   | -0.306    | 5e-06            | NA                    | Hypomethylated in FP vs FN |
| cg18702935 | 0.380   | 0.700   | -0.320    | 6e-06            | NA                    | Hypomethylated in FP vs FN |
| cg23586659 | 0.301   | 0.685   | -0.383    | 6e-06            | NA                    | Hypomethylated in FP vs FN |
| cg04632378 | 0.274   | 0.622   | -0.348    | 6e-06            | NA                    | Hypomethylated in FP vs FN |
| cg24654266 | 0.216   | 0.578   | -0.362    | 6e-06            | NA                    | Hypomethylated in FP vs FN |
| cg06920037 | 0.305   | 0.676   | -0.371    | 6e-06            | NA                    | Hypomethylated in FP vs FN |
| cg13812731 | 0.454   | 0.724   | -0.269    | 6e-06            | NA                    | Hypomethylated in FP vs FN |
| cg17187163 | 0.424   | 0.738   | -0.314    | 6e-06            | MLPH                  | Hypomethylated in FP vs FN |
| cg09649266 | 0.368   | 0.655   | -0.287    | 6e-06            | NA                    | Hypomethylated in FP vs FN |
| cg18950539 | 0.138   | 0.511   | -0.373    | 6e-06            | ZSWIM2                | Hypomethylated in FP vs FN |
| cg20962532 | 0.466   | 0.750   | -0.285    | 6e-06            | KCNJ1                 | Hypomethylated in FP vs FN |
| cg12025243 | 0.332   | 0.592   | -0.259    | 6e-06            | NA                    | Hypomethylated in FP vs FN |
| cg21532636 | 0.205   | 0.463   | -0.258    | 6e-06            | NA                    | Hypomethylated in FP vs FN |
| cg26159090 | 0.520   | 0.824   | -0.304    | 6e-06            | LOC728640             | Hypomethylated in FP vs FN |



### Supplementary Table 7 (continued)

| Probe      | FP.mean | FN.mean | Mean.diff | Adjusted.P.value | Promoter.related.gene | Category                   |
|------------|---------|---------|-----------|------------------|-----------------------|----------------------------|
| cg10872457 | 0.343   | 0.645   | -0.301    | 6e-06            | NA                    | Hypomethylated in FP vs FN |
| cg26266786 | 0.499   | 0.774   | -0.275    | 6e-06            | NA                    | Hypomethylated in FP vs FN |
| cg26444951 | 0.568   | 0.865   | -0.297    | 6e-06            | NA                    | Hypomethylated in FP vs FN |
| cg04122873 | 0.394   | 0.785   | -0.392    | 6e-06            | NA                    | Hypomethylated in FP vs FN |
| cg08029281 | 0.240   | 0.523   | -0.283    | 6e-06            | NA                    | Hypomethylated in FP vs FN |
| cg16426459 | 0.312   | 0.658   | -0.346    | 6e-06            | NA                    | Hypomethylated in FP vs FN |
| cg16744996 | 0.417   | 0.700   | -0.283    | 6e-06            | NA                    | Hypomethylated in FP vs FN |
| cg13742752 | 0.471   | 0.758   | -0.287    | 6e-06            | NA                    | Hypomethylated in FP vs FN |
| cg26014185 | 0.497   | 0.778   | -0.281    | 6e-06            | NA                    | Hypomethylated in FP vs FN |
| cg00547530 | 0.380   | 0.639   | -0.259    | 6e-06            | CLUAP1                | Hypomethylated in FP vs FN |
| cg17980999 | 0.413   | 0.737   | -0.324    | 6e-06            | NA                    | Hypomethylated in FP vs FN |
| cg00820919 | 0.263   | 0.559   | -0.296    | 6e-06            | PLEKHH2               | Hypomethylated in FP vs FN |
| cg26822551 | 0.417   | 0.704   | -0.287    | 6e-06            | NA                    | Hypomethylated in FP vs FN |
| cg22081832 | 0.459   | 0.763   | -0.303    | 6e-06            | NA                    | Hypomethylated in FP vs FN |
| cg14707353 | 0.498   | 0.762   | -0.264    | 6e-06            | NA                    | Hypomethylated in FP vs FN |
| cg00239171 | 0.495   | 0.788   | -0.293    | 6e-06            | NA                    | Hypomethylated in FP vs FN |
| cg07691004 | 0.288   | 0.555   | -0.267    | 6e-06            | GNRH2                 | Hypomethylated in FP vs FN |
| cg13223803 | 0.464   | 0.771   | -0.307    | 6e-06            | NA                    | Hypomethylated in FP vs FN |
| cg10626305 | 0.336   | 0.648   | -0.312    | 6e-06            | NA                    | Hypomethylated in FP vs FN |
| cg13688786 | 0.394   | 0.728   | -0.334    | 6e-06            | NA                    | Hypomethylated in FP vs FN |
| cg17399143 | 0.557   | 0.823   | -0.266    | 6e-06            | NA                    | Hypomethylated in FP vs FN |
| cg19451167 | 0.139   | 0.575   | -0.436    | 6e-06            | NA                    | Hypomethylated in FP vs FN |
| cg23328050 | 0.107   | 0.493   | -0.386    | 6e-06            | PEX11A                | Hypomethylated in FP vs FN |
| cg02788195 | 0.427   | 0.757   | -0.331    | 6e-06            | NA                    | Hypomethylated in FP vs FN |
| cg02268171 | 0.221   | 0.598   | -0.378    | 6e-06            | NA                    | Hypomethylated in FP vs FN |

### Supplementary Table 7 (continued)

| Probe      | FP.mean | FN.mean | Mean.diff | Adjusted.P.value | Promoter.related.gene | Category                   |
|------------|---------|---------|-----------|------------------|-----------------------|----------------------------|
| cg26852437 | 0.462   | 0.743   | -0.281    | 6e-06            | NA                    | Hypomethylated in FP vs FN |
| cg08269742 | 0.211   | 0.476   | -0.266    | 6e-06            | NA                    | Hypomethylated in FP vs FN |
| cg23627134 | 0.330   | 0.603   | -0.273    | 6e-06            | ARHGAP15              | Hypomethylated in FP vs FN |
| cg02022526 | 0.358   | 0.622   | -0.264    | 6e-06            | NA                    | Hypomethylated in FP vs FN |
| cg16235371 | 0.255   | 0.558   | -0.304    | 6e-06            | PCDHB10               | Hypomethylated in FP vs FN |
| cg14379108 | 0.521   | 0.801   | -0.280    | 6e-06            | NA                    | Hypomethylated in FP vs FN |
| cg08908131 | 0.418   | 0.726   | -0.309    | 6e-06            | NA                    | Hypomethylated in FP vs FN |
| cg11466094 | 0.229   | 0.535   | -0.306    | 6e-06            | NA                    | Hypomethylated in FP vs FN |
| cg04204002 | 0.419   | 0.750   | -0.331    | 6e-06            | TMPRSS3               | Hypomethylated in FP vs FN |
| cg13698542 | 0.413   | 0.717   | -0.304    | 6e-06            | VEPH1                 | Hypomethylated in FP vs FN |
| cg17657618 | 0.464   | 0.766   | -0.302    | 6e-06            | NA                    | Hypomethylated in FP vs FN |
| cg19499085 | 0.300   | 0.633   | -0.333    | 6e-06            | NA                    | Hypomethylated in FP vs FN |
| cg26570683 | 0.430   | 0.693   | -0.263    | 6e-06            | ACP5                  | Hypomethylated in FP vs FN |
| cg05777919 | 0.516   | 0.808   | -0.292    | 6e-06            | NA                    | Hypomethylated in FP vs FN |
| cg18516150 | 0.432   | 0.732   | -0.300    | 6e-06            | NA                    | Hypomethylated in FP vs FN |
| cg00571483 | 0.199   | 0.453   | -0.253    | 6e-06            | NA                    | Hypomethylated in FP vs FN |
| cg07419795 | 0.235   | 0.514   | -0.279    | 6e-06            | NA                    | Hypomethylated in FP vs FN |
| cg02853012 | 0.137   | 0.497   | -0.360    | 6e-06            | TMEM26                | Hypomethylated in FP vs FN |
| cg07941953 | 0.497   | 0.758   | -0.261    | 6e-06            | NA                    | Hypomethylated in FP vs FN |
| cg21609624 | 0.558   | 0.845   | -0.287    | 6e-06            | NA                    | Hypomethylated in FP vs FN |
| cg15724328 | 0.433   | 0.780   | -0.347    | 6e-06            | NA                    | Hypomethylated in FP vs FN |
| cg09311683 | 0.134   | 0.579   | -0.446    | 6e-06            | NA                    | Hypomethylated in FP vs FN |
| cg25503903 | 0.212   | 0.620   | -0.408    | 6e-06            | NA                    | Hypomethylated in FP vs FN |
| cg11419575 | 0.250   | 0.566   | -0.316    | 6e-06            | NA                    | Hypomethylated in FP vs FN |
| cg25840173 | 0.363   | 0.642   | -0.279    | 6e-06            | NA                    | Hypomethylated in FP vs FN |

### Supplementary Table 7 (continued)

| Probe      | FP.mean | FN.mean | Mean.diff | Adjusted.P.value | Promoter.related.gene | Category                   |
|------------|---------|---------|-----------|------------------|-----------------------|----------------------------|
| cg22065604 | 0.341   | 0.616   | -0.275    | 6e-06            | NA                    | Hypomethylated in FP vs FN |
| cg24156555 | 0.227   | 0.567   | -0.340    | 6e-06            | NA                    | Hypomethylated in FP vs FN |
| cg14289228 | 0.540   | 0.826   | -0.286    | 6e-06            | NA                    | Hypomethylated in FP vs FN |
| cg12726190 | 0.566   | 0.839   | -0.273    | 6e-06            | NA                    | Hypomethylated in FP vs FN |
| cg26896787 | 0.260   | 0.534   | -0.273    | 6e-06            | NA                    | Hypomethylated in FP vs FN |
| cg02772430 | 0.162   | 0.427   | -0.265    | 6e-06            | SLITRK1               | Hypomethylated in FP vs FN |
| cg21518089 | 0.281   | 0.612   | -0.331    | 6e-06            | NA                    | Hypomethylated in FP vs FN |
| cg13160891 | 0.411   | 0.753   | -0.342    | 6e-06            | NA                    | Hypomethylated in FP vs FN |
| cg06046430 | 0.150   | 0.553   | -0.403    | 6e-06            | ANKRD56               | Hypomethylated in FP vs FN |
| cg07369190 | 0.145   | 0.529   | -0.384    | 6e-06            | NA                    | Hypomethylated in FP vs FN |
| cg24073352 | 0.325   | 0.635   | -0.310    | 6e-06            | NA                    | Hypomethylated in FP vs FN |
| cg02772951 | 0.454   | 0.757   | -0.302    | 6e-06            | TMEM51                | Hypomethylated in FP vs FN |
| cg16470716 | 0.287   | 0.672   | -0.385    | 6e-06            | NA                    | Hypomethylated in FP vs FN |
| cg15901963 | 0.329   | 0.626   | -0.296    | 6e-06            | NA                    | Hypomethylated in FP vs FN |
| cg09981198 | 0.528   | 0.803   | -0.275    | 6e-06            | NA                    | Hypomethylated in FP vs FN |
| cg10816489 | 0.133   | 0.404   | -0.270    | 6e-06            | CYP7B1                | Hypomethylated in FP vs FN |
| cg17101165 | 0.100   | 0.450   | -0.350    | 6e-06            | NA                    | Hypomethylated in FP vs FN |
| cg18000764 | 0.365   | 0.675   | -0.310    | 6e-06            | NA                    | Hypomethylated in FP vs FN |
| cg16092786 | 0.157   | 0.590   | -0.433    | 6e-06            | NA                    | Hypomethylated in FP vs FN |
| cg14975547 | 0.509   | 0.782   | -0.272    | 6e-06            | NA                    | Hypomethylated in FP vs FN |
| cg27090216 | 0.165   | 0.486   | -0.322    | 6e-06            | TNFRSF10C             | Hypomethylated in FP vs FN |
| cg09931793 | 0.443   | 0.775   | -0.332    | 6e-06            | OR2K2                 | Hypomethylated in FP vs FN |
| cg24280832 | 0.567   | 0.863   | -0.297    | 6e-06            | NA                    | Hypomethylated in FP vs FN |
| cg05189127 | 0.408   | 0.777   | -0.369    | 6e-06            | NA                    | Hypomethylated in FP vs FN |
| cg12342003 | 0.427   | 0.709   | -0.282    | 6e-06            | NA                    | Hypomethylated in FP vs FN |

### Supplementary Table 7 (continued)

| Probe      | FP.mean | FN.mean | Mean.diff | Adjusted.P.value | Promoter.related.gene | Category                   |
|------------|---------|---------|-----------|------------------|-----------------------|----------------------------|
| cg17161048 | 0.240   | 0.559   | -0.319    | 6e-06            | NA                    | Hypomethylated in FP vs FN |
| cg00938619 | 0.077   | 0.368   | -0.291    | 6e-06            | FLJ11235              | Hypomethylated in FP vs FN |
| cg21649442 | 0.141   | 0.446   | -0.305    | 6e-06            | NA                    | Hypomethylated in FP vs FN |
| cg26413708 | 0.497   | 0.766   | -0.269    | 6e-06            | NA                    | Hypomethylated in FP vs FN |
| cg02286761 | 0.282   | 0.535   | -0.253    | 6e-06            | NA                    | Hypomethylated in FP vs FN |
| cg13844899 | 0.278   | 0.662   | -0.384    | 6e-06            | EFCAB10               | Hypomethylated in FP vs FN |
| cg26359335 | 0.432   | 0.715   | -0.284    | 6e-06            | NA                    | Hypomethylated in FP vs FN |
| cg00605063 | 0.186   | 0.579   | -0.393    | 6e-06            | NA                    | Hypomethylated in FP vs FN |
| cg03397442 | 0.573   | 0.846   | -0.273    | 6e-06            | NA                    | Hypomethylated in FP vs FN |
| cg14579957 | 0.380   | 0.648   | -0.268    | 6e-06            | NA                    | Hypomethylated in FP vs FN |
| cg19358349 | 0.224   | 0.540   | -0.316    | 6e-06            | PTEN_KILLIN           | Hypomethylated in FP vs FN |
| cg18953784 | 0.135   | 0.472   | -0.336    | 6e-06            | NA                    | Hypomethylated in FP vs FN |
| cg14128641 | 0.321   | 0.649   | -0.329    | 6e-06            | NA                    | Hypomethylated in FP vs FN |
| cg24848035 | 0.199   | 0.653   | -0.454    | 6e-06            | RGS22                 | Hypomethylated in FP vs FN |
| cg26195881 | 0.179   | 0.524   | -0.345    | 7e-06            | ISCA2                 | Hypomethylated in FP vs FN |
| cg06147379 | 0.132   | 0.578   | -0.446    | 7e-06            | RNF207                | Hypomethylated in FP vs FN |
| cg02773086 | 0.375   | 0.728   | -0.354    | 7e-06            | HOXD3                 | Hypomethylated in FP vs FN |
| cg05237640 | 0.511   | 0.773   | -0.262    | 7e-06            | NA                    | Hypomethylated in FP vs FN |
| cg16348470 | 0.199   | 0.623   | -0.423    | 7e-06            | C1orf94               | Hypomethylated in FP vs FN |
| cg26344619 | 0.393   | 0.680   | -0.287    | 7e-06            | NA                    | Hypomethylated in FP vs FN |
| cg08169311 | 0.212   | 0.532   | -0.319    | 7e-06            | NA                    | Hypomethylated in FP vs FN |
| cg03776662 | 0.229   | 0.491   | -0.262    | 7e-06            | NA                    | Hypomethylated in FP vs FN |
| cg00458211 | 0.505   | 0.780   | -0.275    | 7e-06            | NA                    | Hypomethylated in FP vs FN |
| cg02046475 | 0.548   | 0.837   | -0.289    | 7e-06            | NA                    | Hypomethylated in FP vs FN |
| cg17319795 | 0.348   | 0.653   | -0.304    | 7e-06            | NA                    | Hypomethylated in FP vs FN |

### Supplementary Table 7 (continued)

| Probe      | FP.mean | FN.mean | Mean.diff | Adjusted.P.value | Promoter.related.gene | Category                   |
|------------|---------|---------|-----------|------------------|-----------------------|----------------------------|
| cg25584474 | 0.554   | 0.818   | -0.264    | 7e-06            | NA                    | Hypomethylated in FP vs FN |
| cg09903183 | 0.387   | 0.700   | -0.313    | 7e-06            | NA                    | Hypomethylated in FP vs FN |
| cg11891395 | 0.250   | 0.588   | -0.338    | 7e-06            | NA                    | Hypomethylated in FP vs FN |
| cg18173058 | 0.354   | 0.718   | -0.364    | 7e-06            | NA                    | Hypomethylated in FP vs FN |
| cg15665376 | 0.549   | 0.804   | -0.255    | 7e-06            | DSCR10                | Hypomethylated in FP vs FN |
| cg07083043 | 0.330   | 0.617   | -0.286    | 7e-06            | NA                    | Hypomethylated in FP vs FN |
| cg08956474 | 0.451   | 0.759   | -0.308    | 7e-06            | NA                    | Hypomethylated in FP vs FN |
| cg02612228 | 0.369   | 0.718   | -0.349    | 7e-06            | NA                    | Hypomethylated in FP vs FN |
| cg22651048 | 0.472   | 0.737   | -0.264    | 7e-06            | NA                    | Hypomethylated in FP vs FN |
| cg17321561 | 0.442   | 0.762   | -0.320    | 7e-06            | FAM107B               | Hypomethylated in FP vs FN |
| cg08553524 | 0.322   | 0.717   | -0.395    | 7e-06            | NA                    | Hypomethylated in FP vs FN |
| cg02524099 | 0.259   | 0.597   | -0.339    | 7e-06            | NA                    | Hypomethylated in FP vs FN |
| cg18332838 | 0.425   | 0.790   | -0.365    | 7e-06            | NA                    | Hypomethylated in FP vs FN |
| cg09169779 | 0.490   | 0.805   | -0.315    | 7e-06            | NA                    | Hypomethylated in FP vs FN |
| cg15794873 | 0.425   | 0.752   | -0.327    | 7e-06            | NA                    | Hypomethylated in FP vs FN |
| cg26351416 | 0.340   | 0.680   | -0.340    | 7e-06            | NA                    | Hypomethylated in FP vs FN |
| cg24412662 | 0.396   | 0.768   | -0.372    | 7e-06            | NA                    | Hypomethylated in FP vs FN |
| cg02002207 | 0.464   | 0.746   | -0.282    | 7e-06            | NA                    | Hypomethylated in FP vs FN |
| cg24268161 | 0.454   | 0.714   | -0.259    | 7e-06            | NA                    | Hypomethylated in FP vs FN |
| cg26656202 | 0.456   | 0.728   | -0.272    | 7e-06            | NA                    | Hypomethylated in FP vs FN |
| cg01437439 | 0.466   | 0.779   | -0.313    | 7e-06            | NA                    | Hypomethylated in FP vs FN |
| cg27085741 | 0.081   | 0.524   | -0.444    | 7e-06            | NA                    | Hypomethylated in FP vs FN |
| cg01387102 | 0.336   | 0.662   | -0.326    | 7e-06            | MLPH                  | Hypomethylated in FP vs FN |
| cg09704116 | 0.334   | 0.663   | -0.329    | 7e-06            | LOC404266             | Hypomethylated in FP vs FN |
| cg11207307 | 0.310   | 0.653   | -0.343    | 7e-06            | SLC2A14               | Hypomethylated in FP vs FN |

**Supplementary Table 7 (continued)**

| Probe      | FP.mean | FN.mean | Mean.diff | Adjusted.P.value | Promoter.related.gene | Category                   |
|------------|---------|---------|-----------|------------------|-----------------------|----------------------------|
| cg11764177 | 0.143   | 0.551   | -0.408    | 7e-06            | NA                    | Hypomethylated in FP vs FN |
| cg02155360 | 0.366   | 0.681   | -0.315    | 7e-06            | NA                    | Hypomethylated in FP vs FN |
| cg02232089 | 0.481   | 0.738   | -0.257    | 7e-06            | NA                    | Hypomethylated in FP vs FN |
| cg27168410 | 0.481   | 0.762   | -0.281    | 7e-06            | NA                    | Hypomethylated in FP vs FN |
| cg20971147 | 0.325   | 0.646   | -0.320    | 7e-06            | NA                    | Hypomethylated in FP vs FN |
| cg12980201 | 0.462   | 0.792   | -0.330    | 7e-06            | NA                    | Hypomethylated in FP vs FN |
| cg14053997 | 0.285   | 0.619   | -0.334    | 7e-06            | NA                    | Hypomethylated in FP vs FN |
| cg25799589 | 0.486   | 0.763   | -0.277    | 7e-06            | NA                    | Hypomethylated in FP vs FN |
| cg16210719 | 0.291   | 0.568   | -0.277    | 7e-06            | NA                    | Hypomethylated in FP vs FN |
| cg21781988 | 0.235   | 0.519   | -0.283    | 7e-06            | NA                    | Hypomethylated in FP vs FN |
| cg02858288 | 0.458   | 0.764   | -0.306    | 7e-06            | NA                    | Hypomethylated in FP vs FN |
| cg08658634 | 0.350   | 0.662   | -0.312    | 7e-06            | NA                    | Hypomethylated in FP vs FN |
| cg00954167 | 0.523   | 0.798   | -0.275    | 7e-06            | NA                    | Hypomethylated in FP vs FN |
| cg10031651 | 0.526   | 0.791   | -0.264    | 7e-06            | LRRC2                 | Hypomethylated in FP vs FN |
| cg03553278 | 0.220   | 0.504   | -0.284    | 7e-06            | NA                    | Hypomethylated in FP vs FN |
| cg25960038 | 0.432   | 0.746   | -0.314    | 7e-06            | LOC404266             | Hypomethylated in FP vs FN |
| cg12685100 | 0.421   | 0.703   | -0.282    | 7e-06            | NA                    | Hypomethylated in FP vs FN |
| cg18302786 | 0.194   | 0.445   | -0.251    | 7e-06            | PLVAP                 | Hypomethylated in FP vs FN |
| cg21574244 | 0.387   | 0.675   | -0.288    | 7e-06            | NA                    | Hypomethylated in FP vs FN |
| cg07942687 | 0.351   | 0.681   | -0.330    | 7e-06            | NA                    | Hypomethylated in FP vs FN |
| cg25738116 | 0.515   | 0.771   | -0.256    | 7e-06            | PA2G4P4               | Hypomethylated in FP vs FN |
| cg04583232 | 0.262   | 0.584   | -0.322    | 7e-06            | NA                    | Hypomethylated in FP vs FN |
| cg14563787 | 0.512   | 0.799   | -0.286    | 7e-06            | NA                    | Hypomethylated in FP vs FN |
| cg22193150 | 0.340   | 0.670   | -0.329    | 7e-06            | NA                    | Hypomethylated in FP vs FN |
| cg25497399 | 0.213   | 0.578   | -0.365    | 7e-06            | NA                    | Hypomethylated in FP vs FN |

**Supplementary Table 7 (continued)**

| <b>Probe</b> | <b>FP.mean</b> | <b>FN.mean</b> | <b>Mean.diff</b> | <b>Adjusted.P.value</b> | <b>Promoter.related.gene</b> | <b>Category</b>            |
|--------------|----------------|----------------|------------------|-------------------------|------------------------------|----------------------------|
| cg13922021   | 0.317          | 0.677          | -0.360           | 7e-06                   | NA                           | Hypomethylated in FP vs FN |
| cg00870269   | 0.273          | 0.635          | -0.362           | 7e-06                   | NA                           | Hypomethylated in FP vs FN |
| cg18877028   | 0.523          | 0.810          | -0.287           | 7e-06                   | NA                           | Hypomethylated in FP vs FN |
| cg02251349   | 0.369          | 0.637          | -0.269           | 7e-06                   | NA                           | Hypomethylated in FP vs FN |
| cg23004985   | 0.244          | 0.592          | -0.348           | 7e-06                   | NA                           | Hypomethylated in FP vs FN |
| cg02824888   | 0.323          | 0.606          | -0.283           | 7e-06                   | NA                           | Hypomethylated in FP vs FN |
| cg18114053   | 0.480          | 0.751          | -0.271           | 7e-06                   | NA                           | Hypomethylated in FP vs FN |
| cg18515031   | 0.395          | 0.664          | -0.270           | 7e-06                   | NA                           | Hypomethylated in FP vs FN |
| cg08370173   | 0.529          | 0.789          | -0.260           | 7e-06                   | NA                           | Hypomethylated in FP vs FN |
| cg02104138   | 0.161          | 0.508          | -0.347           | 7e-06                   | NA                           | Hypomethylated in FP vs FN |
| cg14428146   | 0.119          | 0.562          | -0.443           | 7e-06                   | NKX2-6                       | Hypomethylated in FP vs FN |
| cg24490542   | 0.126          | 0.439          | -0.313           | 7e-06                   | NA                           | Hypomethylated in FP vs FN |
| cg06514727   | 0.413          | 0.736          | -0.324           | 7e-06                   | NA                           | Hypomethylated in FP vs FN |
| cg04629141   | 0.395          | 0.713          | -0.317           | 7e-06                   | NA                           | Hypomethylated in FP vs FN |
| cg15713734   | 0.565          | 0.866          | -0.301           | 7e-06                   | NA                           | Hypomethylated in FP vs FN |
| cg12630576   | 0.332          | 0.593          | -0.261           | 7e-06                   | NA                           | Hypomethylated in FP vs FN |
| cg13338798   | 0.214          | 0.592          | -0.379           | 7e-06                   | NA                           | Hypomethylated in FP vs FN |
| cg01335127   | 0.272          | 0.643          | -0.371           | 7e-06                   | NA                           | Hypomethylated in FP vs FN |
| cg05136724   | 0.467          | 0.736          | -0.268           | 7e-06                   | NA                           | Hypomethylated in FP vs FN |
| cg02048645   | 0.318          | 0.706          | -0.389           | 7e-06                   | SPAG9                        | Hypomethylated in FP vs FN |
| cg08214060   | 0.508          | 0.804          | -0.296           | 7e-06                   | NA                           | Hypomethylated in FP vs FN |
| cg14847917   | 0.361          | 0.658          | -0.297           | 7e-06                   | NA                           | Hypomethylated in FP vs FN |
| cg21881364   | 0.442          | 0.778          | -0.336           | 7e-06                   | NA                           | Hypomethylated in FP vs FN |
| cg03496533   | 0.267          | 0.532          | -0.264           | 7e-06                   | PRR15L                       | Hypomethylated in FP vs FN |
| cg24315508   | 0.451          | 0.747          | -0.296           | 7e-06                   | NA                           | Hypomethylated in FP vs FN |

### Supplementary Table 7 (continued)

| Probe      | FP.mean | FN.mean | Mean.diff | Adjusted.P.value | Promoter.related.gene | Category                   |
|------------|---------|---------|-----------|------------------|-----------------------|----------------------------|
| cg05053562 | 0.102   | 0.354   | -0.252    | 7e-06            | NOTO                  | Hypomethylated in FP vs FN |
| cg14867085 | 0.256   | 0.510   | -0.254    | 7e-06            | NA                    | Hypomethylated in FP vs FN |
| cg09892984 | 0.466   | 0.723   | -0.257    | 7e-06            | NA                    | Hypomethylated in FP vs FN |
| cg26124318 | 0.109   | 0.470   | -0.361    | 7e-06            | ADAM32                | Hypomethylated in FP vs FN |
| cg01572434 | 0.295   | 0.631   | -0.336    | 7e-06            | NA                    | Hypomethylated in FP vs FN |
| cg01876514 | 0.459   | 0.760   | -0.300    | 8e-06            | NA                    | Hypomethylated in FP vs FN |
| cg26765743 | 0.536   | 0.829   | -0.293    | 8e-06            | NA                    | Hypomethylated in FP vs FN |
| cg05189570 | 0.462   | 0.746   | -0.284    | 8e-06            | BDNF                  | Hypomethylated in FP vs FN |
| cg04138103 | 0.400   | 0.742   | -0.342    | 8e-06            | NA                    | Hypomethylated in FP vs FN |
| cg19661030 | 0.359   | 0.754   | -0.395    | 8e-06            | NA                    | Hypomethylated in FP vs FN |
| cg15516835 | 0.483   | 0.742   | -0.259    | 8e-06            | NA                    | Hypomethylated in FP vs FN |
| cg08493762 | 0.349   | 0.702   | -0.353    | 8e-06            | NA                    | Hypomethylated in FP vs FN |
| cg24698655 | 0.281   | 0.623   | -0.342    | 8e-06            | NA                    | Hypomethylated in FP vs FN |
| cg20300541 | 0.387   | 0.699   | -0.313    | 8e-06            | NA                    | Hypomethylated in FP vs FN |
| cg26231267 | 0.170   | 0.444   | -0.274    | 8e-06            | NA                    | Hypomethylated in FP vs FN |
| cg00754253 | 0.570   | 0.831   | -0.261    | 8e-06            | HRASLS5               | Hypomethylated in FP vs FN |
| cg14132167 | 0.446   | 0.741   | -0.295    | 8e-06            | NA                    | Hypomethylated in FP vs FN |
| cg17905462 | 0.368   | 0.723   | -0.354    | 8e-06            | NA                    | Hypomethylated in FP vs FN |
| cg02260363 | 0.321   | 0.625   | -0.305    | 8e-06            | CRABP1                | Hypomethylated in FP vs FN |
| cg06793277 | 0.387   | 0.670   | -0.282    | 8e-06            | NA                    | Hypomethylated in FP vs FN |
| cg23786152 | 0.447   | 0.756   | -0.309    | 8e-06            | NA                    | Hypomethylated in FP vs FN |
| cg21697560 | 0.557   | 0.814   | -0.257    | 8e-06            | NA                    | Hypomethylated in FP vs FN |
| cg16929496 | 0.381   | 0.684   | -0.303    | 8e-06            | ZNF132                | Hypomethylated in FP vs FN |
| cg07754940 | 0.229   | 0.535   | -0.306    | 8e-06            | NA                    | Hypomethylated in FP vs FN |
| cg12277653 | 0.609   | 0.872   | -0.264    | 8e-06            | NA                    | Hypomethylated in FP vs FN |



### Supplementary Table 7 (continued)

| Probe      | FP.mean | FN.mean | Mean.diff | Adjusted.P.value | Promoter.related.gene | Category                   |
|------------|---------|---------|-----------|------------------|-----------------------|----------------------------|
| cg12524061 | 0.425   | 0.722   | -0.297    | 8e-06            | SDR9C7                | Hypomethylated in FP vs FN |
| cg18114129 | 0.529   | 0.822   | -0.292    | 8e-06            | NA                    | Hypomethylated in FP vs FN |
| cg26157270 | 0.447   | 0.740   | -0.293    | 8e-06            | LRRTM1                | Hypomethylated in FP vs FN |
| cg08039952 | 0.298   | 0.577   | -0.279    | 8e-06            | LOC146336             | Hypomethylated in FP vs FN |
| cg01958906 | 0.533   | 0.833   | -0.300    | 8e-06            | NA                    | Hypomethylated in FP vs FN |
| cg06740442 | 0.323   | 0.701   | -0.378    | 8e-06            | NA                    | Hypomethylated in FP vs FN |
| cg26326560 | 0.511   | 0.769   | -0.258    | 8e-06            | NA                    | Hypomethylated in FP vs FN |
| cg07513789 | 0.403   | 0.699   | -0.296    | 8e-06            | NA                    | Hypomethylated in FP vs FN |
| cg19391384 | 0.566   | 0.828   | -0.262    | 8e-06            | NA                    | Hypomethylated in FP vs FN |
| cg00902147 | 0.513   | 0.877   | -0.363    | 8e-06            | NA                    | Hypomethylated in FP vs FN |
| cg18347602 | 0.265   | 0.560   | -0.295    | 8e-06            | NA                    | Hypomethylated in FP vs FN |
| cg22528270 | 0.204   | 0.593   | -0.389    | 8e-06            | NA                    | Hypomethylated in FP vs FN |
| cg06708731 | 0.442   | 0.695   | -0.253    | 8e-06            | DBH                   | Hypomethylated in FP vs FN |
| cg10980293 | 0.385   | 0.688   | -0.303    | 8e-06            | ASB10                 | Hypomethylated in FP vs FN |
| cg09212118 | 0.323   | 0.620   | -0.297    | 8e-06            | GUCA2A                | Hypomethylated in FP vs FN |
| cg02585598 | 0.152   | 0.531   | -0.378    | 8e-06            | NA                    | Hypomethylated in FP vs FN |
| cg23691781 | 0.298   | 0.565   | -0.267    | 8e-06            | NA                    | Hypomethylated in FP vs FN |
| cg14000361 | 0.109   | 0.480   | -0.371    | 8e-06            | GCM2                  | Hypomethylated in FP vs FN |
| cg11880367 | 0.353   | 0.724   | -0.371    | 8e-06            | NA                    | Hypomethylated in FP vs FN |
| cg15799267 | 0.356   | 0.686   | -0.330    | 8e-06            | ALOX15B               | Hypomethylated in FP vs FN |
| cg10810657 | 0.541   | 0.816   | -0.274    | 8e-06            | NA                    | Hypomethylated in FP vs FN |
| cg01930676 | 0.398   | 0.655   | -0.256    | 8e-06            | MRPL1                 | Hypomethylated in FP vs FN |
| cg26266934 | 0.576   | 0.834   | -0.259    | 8e-06            | FAM174B               | Hypomethylated in FP vs FN |
| cg16692227 | 0.360   | 0.691   | -0.330    | 8e-06            | NA                    | Hypomethylated in FP vs FN |
| cg11012965 | 0.282   | 0.587   | -0.305    | 8e-06            | NA                    | Hypomethylated in FP vs FN |

### Supplementary Table 7 (continued)

| Probe      | FP.mean | FN.mean | Mean.diff | Adjusted.P.value | Promoter.related.gene | Category                   |
|------------|---------|---------|-----------|------------------|-----------------------|----------------------------|
| cg09519060 | 0.544   | 0.836   | -0.292    | 8e-06            | NA                    | Hypomethylated in FP vs FN |
| cg05272888 | 0.467   | 0.779   | -0.312    | 8e-06            | ANUBL1                | Hypomethylated in FP vs FN |
| cg13470069 | 0.226   | 0.637   | -0.412    | 8e-06            | RAB5C                 | Hypomethylated in FP vs FN |
| cg13778519 | 0.479   | 0.768   | -0.289    | 8e-06            | NA                    | Hypomethylated in FP vs FN |
| cg19719207 | 0.487   | 0.741   | -0.254    | 8e-06            | NA                    | Hypomethylated in FP vs FN |
| cg22954810 | 0.521   | 0.781   | -0.260    | 8e-06            | NA                    | Hypomethylated in FP vs FN |
| cg23831143 | 0.112   | 0.471   | -0.359    | 8e-06            | TNFRSF10C             | Hypomethylated in FP vs FN |
| cg27558312 | 0.377   | 0.652   | -0.274    | 8e-06            | LOC285033             | Hypomethylated in FP vs FN |
| cg25773223 | 0.499   | 0.777   | -0.278    | 8e-06            | NA                    | Hypomethylated in FP vs FN |
| cg19139618 | 0.329   | 0.678   | -0.350    | 8e-06            | NA                    | Hypomethylated in FP vs FN |
| cg00946979 | 0.574   | 0.857   | -0.284    | 8e-06            | NA                    | Hypomethylated in FP vs FN |
| cg07788537 | 0.463   | 0.803   | -0.340    | 8e-06            | NA                    | Hypomethylated in FP vs FN |
| cg15346493 | 0.512   | 0.810   | -0.298    | 8e-06            | NA                    | Hypomethylated in FP vs FN |
| cg03724279 | 0.520   | 0.793   | -0.273    | 8e-06            | NA                    | Hypomethylated in FP vs FN |
| cg00698169 | 0.358   | 0.700   | -0.342    | 8e-06            | NA                    | Hypomethylated in FP vs FN |
| cg22720481 | 0.510   | 0.779   | -0.268    | 8e-06            | NA                    | Hypomethylated in FP vs FN |
| cg10945385 | 0.392   | 0.732   | -0.341    | 8e-06            | NA                    | Hypomethylated in FP vs FN |
| cg01567509 | 0.502   | 0.792   | -0.290    | 8e-06            | NA                    | Hypomethylated in FP vs FN |
| cg00628788 | 0.348   | 0.695   | -0.347    | 8e-06            | NA                    | Hypomethylated in FP vs FN |
| cg17794905 | 0.472   | 0.727   | -0.255    | 8e-06            | NA                    | Hypomethylated in FP vs FN |
| cg00682096 | 0.453   | 0.771   | -0.318    | 8e-06            | LOC404266             | Hypomethylated in FP vs FN |
| cg18355562 | 0.435   | 0.724   | -0.289    | 8e-06            | NA                    | Hypomethylated in FP vs FN |
| cg26335577 | 0.528   | 0.795   | -0.267    | 8e-06            | NA                    | Hypomethylated in FP vs FN |
| cg07451886 | 0.263   | 0.575   | -0.312    | 9e-06            | NA                    | Hypomethylated in FP vs FN |
| cg25332265 | 0.336   | 0.619   | -0.282    | 9e-06            | NA                    | Hypomethylated in FP vs FN |

### Supplementary Table 7 (continued)

| Probe      | FP.mean | FN.mean | Mean.diff | Adjusted.P.value | Promoter.related.gene | Category                   |
|------------|---------|---------|-----------|------------------|-----------------------|----------------------------|
| cg12385599 | 0.293   | 0.657   | -0.365    | 9e-06            | LOC389493             | Hypomethylated in FP vs FN |
| cg24780007 | 0.509   | 0.799   | -0.290    | 9e-06            | NA                    | Hypomethylated in FP vs FN |
| cg18088442 | 0.140   | 0.520   | -0.380    | 9e-06            | NA                    | Hypomethylated in FP vs FN |
| cg03176810 | 0.393   | 0.667   | -0.274    | 9e-06            | NA                    | Hypomethylated in FP vs FN |
| cg22616126 | 0.430   | 0.747   | -0.317    | 9e-06            | NA                    | Hypomethylated in FP vs FN |
| cg01789926 | 0.337   | 0.688   | -0.350    | 9e-06            | NA                    | Hypomethylated in FP vs FN |
| cg22232978 | 0.415   | 0.721   | -0.306    | 9e-06            | NA                    | Hypomethylated in FP vs FN |
| cg04687310 | 0.326   | 0.658   | -0.332    | 9e-06            | NA                    | Hypomethylated in FP vs FN |
| cg10656871 | 0.497   | 0.782   | -0.285    | 9e-06            | NA                    | Hypomethylated in FP vs FN |
| cg25695610 | 0.446   | 0.786   | -0.340    | 9e-06            | NA                    | Hypomethylated in FP vs FN |
| cg24583624 | 0.275   | 0.646   | -0.371    | 9e-06            | PCDHB5                | Hypomethylated in FP vs FN |
| cg13422676 | 0.440   | 0.776   | -0.336    | 9e-06            | NA                    | Hypomethylated in FP vs FN |
| cg24753988 | 0.410   | 0.678   | -0.269    | 9e-06            | NA                    | Hypomethylated in FP vs FN |
| cg01712671 | 0.338   | 0.670   | -0.332    | 9e-06            | NA                    | Hypomethylated in FP vs FN |
| cg19689211 | 0.475   | 0.764   | -0.289    | 9e-06            | NA                    | Hypomethylated in FP vs FN |
| cg20120512 | 0.313   | 0.601   | -0.289    | 9e-06            | NA                    | Hypomethylated in FP vs FN |
| cg23357150 | 0.403   | 0.655   | -0.252    | 9e-06            | NA                    | Hypomethylated in FP vs FN |
| cg16616765 | 0.301   | 0.649   | -0.347    | 9e-06            | NA                    | Hypomethylated in FP vs FN |
| cg27307298 | 0.342   | 0.730   | -0.388    | 9e-06            | NA                    | Hypomethylated in FP vs FN |
| cg09579310 | 0.178   | 0.483   | -0.305    | 9e-06            | NA                    | Hypomethylated in FP vs FN |
| cg19417526 | 0.435   | 0.767   | -0.332    | 9e-06            | NA                    | Hypomethylated in FP vs FN |
| cg09216650 | 0.461   | 0.758   | -0.297    | 9e-06            | NA                    | Hypomethylated in FP vs FN |
| cg23415916 | 0.317   | 0.605   | -0.288    | 9e-06            | NA                    | Hypomethylated in FP vs FN |
| cg24678095 | 0.088   | 0.476   | -0.388    | 9e-06            | GALNT3                | Hypomethylated in FP vs FN |
| cg17198762 | 0.191   | 0.504   | -0.313    | 9e-06            | LOC390594             | Hypomethylated in FP vs FN |

### Supplementary Table 7 (continued)

| Probe      | FP.mean | FN.mean | Mean.diff | Adjusted.P.value | Promoter.related.gene | Category                   |
|------------|---------|---------|-----------|------------------|-----------------------|----------------------------|
| cg08342966 | 0.330   | 0.648   | -0.318    | 9e-06            | NA                    | Hypomethylated in FP vs FN |
| cg14111974 | 0.491   | 0.786   | -0.295    | 9e-06            | NA                    | Hypomethylated in FP vs FN |
| cg19682786 | 0.371   | 0.717   | -0.346    | 9e-06            | MGC26647              | Hypomethylated in FP vs FN |
| cg14192299 | 0.578   | 0.829   | -0.252    | 9e-06            | NANOS2                | Hypomethylated in FP vs FN |
| cg27579359 | 0.563   | 0.823   | -0.260    | 9e-06            | NA                    | Hypomethylated in FP vs FN |
| cg04401603 | 0.617   | 0.875   | -0.258    | 9e-06            | NA                    | Hypomethylated in FP vs FN |
| cg16097205 | 0.327   | 0.596   | -0.269    | 9e-06            | NA                    | Hypomethylated in FP vs FN |
| cg04850999 | 0.495   | 0.780   | -0.285    | 9e-06            | NA                    | Hypomethylated in FP vs FN |
| cg16833444 | 0.371   | 0.687   | -0.316    | 9e-06            | NA                    | Hypomethylated in FP vs FN |
| cg02825412 | 0.264   | 0.537   | -0.273    | 9e-06            | NA                    | Hypomethylated in FP vs FN |
| cg15104126 | 0.510   | 0.773   | -0.263    | 9e-06            | NA                    | Hypomethylated in FP vs FN |
| cg23715045 | 0.394   | 0.734   | -0.340    | 9e-06            | NA                    | Hypomethylated in FP vs FN |
| cg22718140 | 0.411   | 0.784   | -0.373    | 9e-06            | NA                    | Hypomethylated in FP vs FN |
| cg18678645 | 0.500   | 0.792   | -0.292    | 9e-06            | MIR886                | Hypomethylated in FP vs FN |
| cg16509072 | 0.286   | 0.610   | -0.324    | 9e-06            | NA                    | Hypomethylated in FP vs FN |
| cg06206831 | 0.570   | 0.820   | -0.251    | 9e-06            | NA                    | Hypomethylated in FP vs FN |
| cg06650246 | 0.395   | 0.699   | -0.304    | 9e-06            | NA                    | Hypomethylated in FP vs FN |
| cg14539062 | 0.396   | 0.741   | -0.345    | 9e-06            | NA                    | Hypomethylated in FP vs FN |
| cg02340541 | 0.266   | 0.622   | -0.355    | 9e-06            | GAL                   | Hypomethylated in FP vs FN |
| cg04278371 | 0.425   | 0.685   | -0.260    | 9e-06            | NCRNA00175            | Hypomethylated in FP vs FN |
| cg10475928 | 0.489   | 0.798   | -0.309    | 9e-06            | NA                    | Hypomethylated in FP vs FN |
| cg07503059 | 0.161   | 0.521   | -0.360    | 9e-06            | FLJ11235              | Hypomethylated in FP vs FN |
| cg19525780 | 0.571   | 0.842   | -0.271    | 9e-06            | NA                    | Hypomethylated in FP vs FN |
| cg06788355 | 0.380   | 0.660   | -0.280    | 9e-06            | NA                    | Hypomethylated in FP vs FN |
| cg00320216 | 0.583   | 0.858   | -0.275    | 1e-05            | NA                    | Hypomethylated in FP vs FN |

### Supplementary Table 7 (continued)

| Probe      | FP.mean | FN.mean | Mean.diff | Adjusted.P.value | Promoter.related.gene | Category                   |
|------------|---------|---------|-----------|------------------|-----------------------|----------------------------|
| cg22891707 | 0.315   | 0.587   | -0.272    | 1e-05            | NA                    | Hypomethylated in FP vs FN |
| cg05872236 | 0.261   | 0.581   | -0.320    | 1e-05            | NA                    | Hypomethylated in FP vs FN |
| cg21361134 | 0.433   | 0.732   | -0.299    | 1e-05            | CLRN1_CLRN1OS         | Hypomethylated in FP vs FN |
| cg16272420 | 0.461   | 0.733   | -0.271    | 1e-05            | NA                    | Hypomethylated in FP vs FN |
| cg24900927 | 0.437   | 0.728   | -0.291    | 1e-05            | NA                    | Hypomethylated in FP vs FN |
| cg12117396 | 0.438   | 0.722   | -0.284    | 1e-05            | NA                    | Hypomethylated in FP vs FN |
| cg02933354 | 0.468   | 0.756   | -0.287    | 1e-05            | VEPH1                 | Hypomethylated in FP vs FN |
| cg05781609 | 0.385   | 0.697   | -0.312    | 1e-05            | NA                    | Hypomethylated in FP vs FN |
| cg00195749 | 0.332   | 0.646   | -0.314    | 1e-05            | NA                    | Hypomethylated in FP vs FN |
| cg10709246 | 0.304   | 0.615   | -0.310    | 1e-05            | PLVAP                 | Hypomethylated in FP vs FN |
| cg17658002 | 0.452   | 0.768   | -0.316    | 1e-05            | ACP5                  | Hypomethylated in FP vs FN |
| cg03420144 | 0.383   | 0.639   | -0.256    | 1e-05            | NA                    | Hypomethylated in FP vs FN |
| cg04259907 | 0.334   | 0.672   | -0.338    | 1e-05            | LYPD3                 | Hypomethylated in FP vs FN |
| cg07365127 | 0.168   | 0.594   | -0.426    | 1e-05            | NA                    | Hypomethylated in FP vs FN |
| cg10232265 | 0.328   | 0.640   | -0.312    | 1e-05            | NA                    | Hypomethylated in FP vs FN |
| cg25322847 | 0.436   | 0.765   | -0.329    | 1e-05            | NA                    | Hypomethylated in FP vs FN |
| cg23493497 | 0.452   | 0.718   | -0.266    | 1e-05            | NA                    | Hypomethylated in FP vs FN |
| cg10887937 | 0.432   | 0.723   | -0.291    | 1e-05            | ALDH2                 | Hypomethylated in FP vs FN |
| cg05640754 | 0.611   | 0.865   | -0.254    | 1e-05            | NA                    | Hypomethylated in FP vs FN |
| cg05267394 | 0.194   | 0.646   | -0.452    | 1e-05            | NA                    | Hypomethylated in FP vs FN |
| cg14897263 | 0.276   | 0.548   | -0.272    | 1e-05            | NA                    | Hypomethylated in FP vs FN |
| cg14514032 | 0.070   | 0.401   | -0.331    | 1e-05            | NA                    | Hypomethylated in FP vs FN |
| cg05141988 | 0.496   | 0.756   | -0.260    | 1e-05            | NA                    | Hypomethylated in FP vs FN |
| cg09340205 | 0.470   | 0.775   | -0.305    | 1e-05            | NA                    | Hypomethylated in FP vs FN |
| cg16852685 | 0.186   | 0.528   | -0.342    | 1e-05            | NA                    | Hypomethylated in FP vs FN |

### Supplementary Table 7 (continued)

| Probe      | FP.mean | FN.mean | Mean.diff | Adjusted.P.value | Promoter.related.gene | Category                   |
|------------|---------|---------|-----------|------------------|-----------------------|----------------------------|
| cg14110548 | 0.316   | 0.627   | -0.311    | 1e-05            | NA                    | Hypomethylated in FP vs FN |
| cg09420319 | 0.325   | 0.698   | -0.373    | 1e-05            | NA                    | Hypomethylated in FP vs FN |
| cg16642284 | 0.175   | 0.673   | -0.498    | 1e-05            | FOXI2                 | Hypomethylated in FP vs FN |
| cg25400358 | 0.337   | 0.602   | -0.264    | 1e-05            | GPR137                | Hypomethylated in FP vs FN |
| cg07211140 | 0.155   | 0.589   | -0.434    | 1e-05            | NA                    | Hypomethylated in FP vs FN |
| cg13066658 | 0.155   | 0.536   | -0.381    | 1e-05            | NA                    | Hypomethylated in FP vs FN |
| cg03573945 | 0.200   | 0.527   | -0.327    | 1e-05            | NA                    | Hypomethylated in FP vs FN |
| cg24565742 | 0.360   | 0.663   | -0.303    | 1e-05            | NA                    | Hypomethylated in FP vs FN |
| cg02189843 | 0.345   | 0.640   | -0.295    | 1e-05            | NA                    | Hypomethylated in FP vs FN |
| cg19822110 | 0.320   | 0.683   | -0.363    | 1e-05            | NA                    | Hypomethylated in FP vs FN |
| cg10117369 | 0.269   | 0.539   | -0.270    | 1e-05            | LAX1                  | Hypomethylated in FP vs FN |
| cg02375065 | 0.494   | 0.760   | -0.267    | 1e-05            | NA                    | Hypomethylated in FP vs FN |
| cg25586361 | 0.344   | 0.639   | -0.295    | 1e-05            | NA                    | Hypomethylated in FP vs FN |
| cg11207515 | 0.177   | 0.430   | -0.253    | 1e-05            | NA                    | Hypomethylated in FP vs FN |
| cg20899151 | 0.371   | 0.697   | -0.326    | 1e-05            | NA                    | Hypomethylated in FP vs FN |
| cg14421582 | 0.490   | 0.744   | -0.254    | 1e-05            | NA                    | Hypomethylated in FP vs FN |
| cg07336872 | 0.280   | 0.594   | -0.314    | 1e-05            | NA                    | Hypomethylated in FP vs FN |
| cg12698813 | 0.143   | 0.492   | -0.349    | 1e-05            | NA                    | Hypomethylated in FP vs FN |
| cg00234370 | 0.307   | 0.634   | -0.327    | 1e-05            | NA                    | Hypomethylated in FP vs FN |
| cg24311236 | 0.431   | 0.736   | -0.306    | 1e-05            | NA                    | Hypomethylated in FP vs FN |
| cg11832309 | 0.335   | 0.654   | -0.320    | 1e-05            | NA                    | Hypomethylated in FP vs FN |
| cg06648812 | 0.311   | 0.574   | -0.263    | 1e-05            | PDE6B                 | Hypomethylated in FP vs FN |
| cg00660106 | 0.417   | 0.712   | -0.295    | 1e-05            | NA                    | Hypomethylated in FP vs FN |
| cg27365426 | 0.351   | 0.608   | -0.257    | 1e-05            | ARHGAP15              | Hypomethylated in FP vs FN |
| cg21221690 | 0.360   | 0.661   | -0.301    | 1e-05            | NA                    | Hypomethylated in FP vs FN |

### Supplementary Table 7 (continued)

| Probe      | FP.mean | FN.mean | Mean.diff | Adjusted.P.value | Promoter.related.gene | Category                   |
|------------|---------|---------|-----------|------------------|-----------------------|----------------------------|
| cg11712506 | 0.142   | 0.477   | -0.335    | 1e-05            | NA                    | Hypomethylated in FP vs FN |
| cg12675848 | 0.168   | 0.551   | -0.383    | 1e-05            | NA                    | Hypomethylated in FP vs FN |
| cg18383538 | 0.226   | 0.611   | -0.386    | 1e-05            | NA                    | Hypomethylated in FP vs FN |
| cg17935536 | 0.225   | 0.499   | -0.274    | 1e-05            | NA                    | Hypomethylated in FP vs FN |
| cg10409230 | 0.459   | 0.779   | -0.320    | 1e-05            | NA                    | Hypomethylated in FP vs FN |
| cg12275060 | 0.314   | 0.616   | -0.302    | 1e-05            | NA                    | Hypomethylated in FP vs FN |
| cg03001143 | 0.487   | 0.756   | -0.269    | 1e-05            | METTL11B              | Hypomethylated in FP vs FN |
| cg16409795 | 0.335   | 0.607   | -0.272    | 1e-05            | NA                    | Hypomethylated in FP vs FN |
| cg10484693 | 0.344   | 0.666   | -0.321    | 1e-05            | NA                    | Hypomethylated in FP vs FN |
| cg04552480 | 0.319   | 0.583   | -0.264    | 1e-05            | NA                    | Hypomethylated in FP vs FN |
| cg03047070 | 0.393   | 0.644   | -0.251    | 1e-05            | NA                    | Hypomethylated in FP vs FN |
| cg06113801 | 0.278   | 0.581   | -0.303    | 1e-05            | NA                    | Hypomethylated in FP vs FN |
| cg16986315 | 0.585   | 0.838   | -0.252    | 1e-05            | NA                    | Hypomethylated in FP vs FN |
| cg22164009 | 0.441   | 0.703   | -0.261    | 1e-05            | NA                    | Hypomethylated in FP vs FN |
| cg23860266 | 0.553   | 0.835   | -0.283    | 1e-05            | NA                    | Hypomethylated in FP vs FN |
| cg01425967 | 0.217   | 0.512   | -0.295    | 1e-05            | PCP4L1                | Hypomethylated in FP vs FN |
| cg12366685 | 0.318   | 0.596   | -0.278    | 1e-05            | NA                    | Hypomethylated in FP vs FN |
| cg02595832 | 0.101   | 0.559   | -0.458    | 1e-05            | FOXI2                 | Hypomethylated in FP vs FN |
| cg14043803 | 0.405   | 0.673   | -0.269    | 1e-05            | NA                    | Hypomethylated in FP vs FN |
| cg19556343 | 0.284   | 0.673   | -0.389    | 1e-05            | NCAM2                 | Hypomethylated in FP vs FN |
| cg24951286 | 0.374   | 0.690   | -0.316    | 1e-05            | PCDHB15               | Hypomethylated in FP vs FN |
| cg20599066 | 0.263   | 0.669   | -0.406    | 1e-05            | NA                    | Hypomethylated in FP vs FN |
| cg10553596 | 0.328   | 0.586   | -0.258    | 1e-05            | NEU4                  | Hypomethylated in FP vs FN |
| cg00833639 | 0.496   | 0.791   | -0.295    | 1e-05            | NA                    | Hypomethylated in FP vs FN |
| cg24009074 | 0.531   | 0.785   | -0.254    | 1e-05            | NA                    | Hypomethylated in FP vs FN |

### Supplementary Table 7 (continued)

| Probe      | FP.mean | FN.mean | Mean.diff | Adjusted.P.value | Promoter.related.gene | Category                   |
|------------|---------|---------|-----------|------------------|-----------------------|----------------------------|
| cg13135031 | 0.112   | 0.401   | -0.289    | 1e-05            | ZSWIM2                | Hypomethylated in FP vs FN |
| cg16711556 | 0.346   | 0.667   | -0.322    | 1e-05            | NA                    | Hypomethylated in FP vs FN |
| cg21884122 | 0.467   | 0.734   | -0.267    | 1e-05            | NA                    | Hypomethylated in FP vs FN |
| cg01029685 | 0.268   | 0.580   | -0.312    | 1e-05            | PCDHA9                | Hypomethylated in FP vs FN |
| cg18836618 | 0.508   | 0.765   | -0.257    | 1e-05            | NA                    | Hypomethylated in FP vs FN |
| cg19103219 | 0.452   | 0.775   | -0.322    | 1e-05            | NA                    | Hypomethylated in FP vs FN |
| cg26820168 | 0.296   | 0.607   | -0.310    | 1e-05            | NA                    | Hypomethylated in FP vs FN |
| cg22949562 | 0.362   | 0.669   | -0.307    | 1e-05            | NA                    | Hypomethylated in FP vs FN |
| cg14023309 | 0.490   | 0.771   | -0.282    | 1e-05            | NA                    | Hypomethylated in FP vs FN |
| cg18997129 | 0.517   | 0.783   | -0.266    | 1e-05            | EPHA1                 | Hypomethylated in FP vs FN |
| cg26966434 | 0.402   | 0.744   | -0.343    | 1e-05            | NA                    | Hypomethylated in FP vs FN |
| cg26100986 | 0.162   | 0.450   | -0.287    | 1e-05            | NA                    | Hypomethylated in FP vs FN |
| cg24095850 | 0.297   | 0.669   | -0.372    | 1e-05            | NA                    | Hypomethylated in FP vs FN |
| cg02577387 | 0.363   | 0.672   | -0.309    | 1e-05            | NA                    | Hypomethylated in FP vs FN |
| cg01986263 | 0.246   | 0.499   | -0.253    | 1e-05            | NA                    | Hypomethylated in FP vs FN |
| cg06833778 | 0.335   | 0.648   | -0.312    | 1e-05            | NA                    | Hypomethylated in FP vs FN |
| cg07027613 | 0.285   | 0.559   | -0.274    | 1e-05            | LOC283314             | Hypomethylated in FP vs FN |
| cg16876236 | 0.433   | 0.736   | -0.303    | 1e-05            | BANF2                 | Hypomethylated in FP vs FN |
| cg18391058 | 0.609   | 0.865   | -0.256    | 1e-05            | NA                    | Hypomethylated in FP vs FN |
| cg26378982 | 0.513   | 0.845   | -0.332    | 1e-05            | KCNF1                 | Hypomethylated in FP vs FN |
| cg05198244 | 0.270   | 0.634   | -0.364    | 1e-05            | NA                    | Hypomethylated in FP vs FN |
| cg03246694 | 0.201   | 0.605   | -0.404    | 1e-05            | NA                    | Hypomethylated in FP vs FN |
| cg26026615 | 0.353   | 0.698   | -0.345    | 1e-05            | NA                    | Hypomethylated in FP vs FN |
| cg14154973 | 0.131   | 0.487   | -0.356    | 1e-05            | PEX11A                | Hypomethylated in FP vs FN |
| cg02072366 | 0.123   | 0.375   | -0.253    | 1e-05            | NA                    | Hypomethylated in FP vs FN |



### Supplementary Table 7 (continued)

| Probe      | FP.mean | FN.mean | Mean.diff | Adjusted.P.value | Promoter.related.gene | Category                   |
|------------|---------|---------|-----------|------------------|-----------------------|----------------------------|
| cg20191453 | 0.397   | 0.685   | -0.288    | 1e-05            | AMT                   | Hypomethylated in FP vs FN |
| cg22367264 | 0.522   | 0.817   | -0.295    | 1e-05            | NA                    | Hypomethylated in FP vs FN |
| cg04221683 | 0.475   | 0.737   | -0.261    | 1e-05            | NA                    | Hypomethylated in FP vs FN |
| cg05890855 | 0.226   | 0.499   | -0.273    | 1e-05            | NA                    | Hypomethylated in FP vs FN |
| cg16518167 | 0.459   | 0.721   | -0.262    | 1e-05            | NA                    | Hypomethylated in FP vs FN |
| cg14306161 | 0.310   | 0.570   | -0.260    | 1e-05            | NA                    | Hypomethylated in FP vs FN |
| cg01511232 | 0.347   | 0.691   | -0.344    | 1e-05            | NA                    | Hypomethylated in FP vs FN |
| cg12633410 | 0.556   | 0.811   | -0.255    | 1e-05            | NA                    | Hypomethylated in FP vs FN |
| cg11500797 | 0.233   | 0.587   | -0.354    | 1e-05            | NA                    | Hypomethylated in FP vs FN |
| cg27130630 | 0.262   | 0.577   | -0.315    | 1e-05            | LOC283314             | Hypomethylated in FP vs FN |
| cg00145915 | 0.500   | 0.793   | -0.292    | 1e-05            | NA                    | Hypomethylated in FP vs FN |
| cg10779492 | 0.336   | 0.672   | -0.336    | 1e-05            | NA                    | Hypomethylated in FP vs FN |
| cg14564965 | 0.397   | 0.667   | -0.270    | 1e-05            | NA                    | Hypomethylated in FP vs FN |
| cg12905673 | 0.398   | 0.739   | -0.341    | 1e-05            | NA                    | Hypomethylated in FP vs FN |
| cg22399133 | 0.163   | 0.604   | -0.441    | 1e-05            | CRYGD                 | Hypomethylated in FP vs FN |
| cg23906872 | 0.404   | 0.663   | -0.259    | 1e-05            | KCNQ1OT1              | Hypomethylated in FP vs FN |
| cg22998959 | 0.332   | 0.638   | -0.306    | 1e-05            | NA                    | Hypomethylated in FP vs FN |
| cg17258460 | 0.569   | 0.823   | -0.254    | 1e-05            | NA                    | Hypomethylated in FP vs FN |
| cg25226247 | 0.393   | 0.709   | -0.316    | 1e-05            | TFAP2B                | Hypomethylated in FP vs FN |
| cg17590234 | 0.329   | 0.600   | -0.271    | 1e-05            | PDE4B                 | Hypomethylated in FP vs FN |
| cg22721851 | 0.491   | 0.748   | -0.257    | 1e-05            | NA                    | Hypomethylated in FP vs FN |
| cg13206191 | 0.484   | 0.808   | -0.323    | 1e-05            | NA                    | Hypomethylated in FP vs FN |
| cg13173286 | 0.565   | 0.850   | -0.285    | 1e-05            | NA                    | Hypomethylated in FP vs FN |
| cg18249580 | 0.299   | 0.726   | -0.428    | 1e-05            | NA                    | Hypomethylated in FP vs FN |
| cg14335159 | 0.384   | 0.734   | -0.350    | 1e-05            | NA                    | Hypomethylated in FP vs FN |

### Supplementary Table 7 (continued)

| Probe      | FP.mean | FN.mean | Mean.diff | Adjusted.P.value | Promoter.related.gene | Category                   |
|------------|---------|---------|-----------|------------------|-----------------------|----------------------------|
| cg04030615 | 0.074   | 0.419   | -0.345    | 1e-05            | ACTA1                 | Hypomethylated in FP vs FN |
| cg06350882 | 0.521   | 0.803   | -0.282    | 1e-05            | NA                    | Hypomethylated in FP vs FN |
| cg10683775 | 0.461   | 0.747   | -0.286    | 1e-05            | NA                    | Hypomethylated in FP vs FN |
| cg12575771 | 0.309   | 0.572   | -0.263    | 1e-05            | IL9                   | Hypomethylated in FP vs FN |
| cg03401213 | 0.456   | 0.724   | -0.268    | 1e-05            | NME2                  | Hypomethylated in FP vs FN |
| cg00757262 | 0.437   | 0.696   | -0.259    | 1e-05            | NA                    | Hypomethylated in FP vs FN |
| cg21307628 | 0.500   | 0.772   | -0.271    | 1e-05            | CCDC80                | Hypomethylated in FP vs FN |
| cg06252645 | 0.435   | 0.696   | -0.260    | 1e-05            | NA                    | Hypomethylated in FP vs FN |
| cg24606594 | 0.336   | 0.696   | -0.360    | 1e-05            | NA                    | Hypomethylated in FP vs FN |
| cg17067226 | 0.314   | 0.670   | -0.356    | 1e-05            | NA                    | Hypomethylated in FP vs FN |
| cg16929393 | 0.398   | 0.704   | -0.306    | 1e-05            | NA                    | Hypomethylated in FP vs FN |
| cg26147269 | 0.485   | 0.737   | -0.252    | 1e-05            | HDAC11                | Hypomethylated in FP vs FN |
| cg14822719 | 0.272   | 0.606   | -0.333    | 1e-05            | NA                    | Hypomethylated in FP vs FN |
| cg25846784 | 0.127   | 0.544   | -0.417    | 1e-05            | NA                    | Hypomethylated in FP vs FN |
| cg23049758 | 0.316   | 0.597   | -0.281    | 1e-05            | NA                    | Hypomethylated in FP vs FN |
| cg01840128 | 0.507   | 0.781   | -0.273    | 1e-05            | NA                    | Hypomethylated in FP vs FN |
| cg03912703 | 0.264   | 0.595   | -0.331    | 1e-05            | NA                    | Hypomethylated in FP vs FN |
| cg13429423 | 0.289   | 0.581   | -0.292    | 1e-05            | PARVG                 | Hypomethylated in FP vs FN |
| cg27440150 | 0.327   | 0.624   | -0.297    | 1e-05            | NA                    | Hypomethylated in FP vs FN |
| cg00596763 | 0.518   | 0.797   | -0.279    | 1e-05            | LOC389332             | Hypomethylated in FP vs FN |
| cg18477666 | 0.398   | 0.699   | -0.301    | 1e-05            | NA                    | Hypomethylated in FP vs FN |
| cg12487655 | 0.374   | 0.671   | -0.297    | 1e-05            | NA                    | Hypomethylated in FP vs FN |
| cg24439401 | 0.406   | 0.666   | -0.261    | 1e-05            | NA                    | Hypomethylated in FP vs FN |
| cg00226923 | 0.339   | 0.604   | -0.264    | 1e-05            | FGD2                  | Hypomethylated in FP vs FN |
| cg12143789 | 0.150   | 0.587   | -0.437    | 1e-05            | NA                    | Hypomethylated in FP vs FN |

### Supplementary Table 7 (continued)

| Probe      | FP.mean | FN.mean | Mean.diff | Adjusted.P.value | Promoter.related.gene | Category                   |
|------------|---------|---------|-----------|------------------|-----------------------|----------------------------|
| cg18860310 | 0.245   | 0.520   | -0.274    | 1e-05            | NA                    | Hypomethylated in FP vs FN |
| cg12718528 | 0.417   | 0.676   | -0.259    | 1e-05            | NA                    | Hypomethylated in FP vs FN |
| cg23933503 | 0.540   | 0.804   | -0.265    | 1e-05            | NA                    | Hypomethylated in FP vs FN |
| cg18670236 | 0.288   | 0.637   | -0.349    | 1e-05            | NA                    | Hypomethylated in FP vs FN |
| cg05646686 | 0.255   | 0.639   | -0.384    | 1e-05            | NA                    | Hypomethylated in FP vs FN |
| cg14517743 | 0.221   | 0.633   | -0.412    | 1e-05            | NA                    | Hypomethylated in FP vs FN |
| cg12887033 | 0.313   | 0.611   | -0.298    | 1e-05            | NA                    | Hypomethylated in FP vs FN |
| cg15537254 | 0.200   | 0.480   | -0.280    | 1e-05            | NCRNA00028            | Hypomethylated in FP vs FN |
| cg23763427 | 0.404   | 0.746   | -0.342    | 1e-05            | NA                    | Hypomethylated in FP vs FN |
| cg27442349 | 0.497   | 0.755   | -0.257    | 1e-05            | NFKBIB                | Hypomethylated in FP vs FN |
| cg05671386 | 0.312   | 0.653   | -0.341    | 1e-05            | CLUAP1                | Hypomethylated in FP vs FN |
| cg21081729 | 0.386   | 0.681   | -0.295    | 1e-05            | NA                    | Hypomethylated in FP vs FN |
| cg19725098 | 0.506   | 0.777   | -0.272    | 1e-05            | NA                    | Hypomethylated in FP vs FN |
| cg04330449 | 0.120   | 0.461   | -0.340    | 1e-05            | NEUROG1               | Hypomethylated in FP vs FN |
| cg05050072 | 0.378   | 0.761   | -0.383    | 1e-05            | NA                    | Hypomethylated in FP vs FN |
| cg05785989 | 0.465   | 0.739   | -0.274    | 1e-05            | NA                    | Hypomethylated in FP vs FN |
| cg18917643 | 0.483   | 0.740   | -0.257    | 1e-05            | NA                    | Hypomethylated in FP vs FN |
| cg06324037 | 0.479   | 0.746   | -0.268    | 1e-05            | NA                    | Hypomethylated in FP vs FN |
| cg16622517 | 0.316   | 0.589   | -0.273    | 1e-05            | NA                    | Hypomethylated in FP vs FN |
| cg00955867 | 0.319   | 0.687   | -0.367    | 1e-05            | NHLH1                 | Hypomethylated in FP vs FN |
| cg03509193 | 0.457   | 0.749   | -0.291    | 1e-05            | NA                    | Hypomethylated in FP vs FN |
| cg20882260 | 0.389   | 0.678   | -0.289    | 1e-05            | NA                    | Hypomethylated in FP vs FN |
| cg02329038 | 0.289   | 0.623   | -0.335    | 1e-05            | MIR196A1              | Hypomethylated in FP vs FN |
| cg16510440 | 0.292   | 0.559   | -0.268    | 1e-05            | NA                    | Hypomethylated in FP vs FN |
| cg27597473 | 0.424   | 0.702   | -0.278    | 1e-05            | NA                    | Hypomethylated in FP vs FN |

### Supplementary Table 7 (continued)

| Probe      | FP.mean | FN.mean | Mean.diff | Adjusted.P.value | Promoter.related.gene | Category                   |
|------------|---------|---------|-----------|------------------|-----------------------|----------------------------|
| cg12771187 | 0.585   | 0.843   | -0.259    | 1e-05            | NA                    | Hypomethylated in FP vs FN |
| cg01076708 | 0.449   | 0.712   | -0.263    | 1e-05            | NA                    | Hypomethylated in FP vs FN |
| cg06569117 | 0.272   | 0.579   | -0.307    | 1e-05            | NA                    | Hypomethylated in FP vs FN |
| cg10220117 | 0.336   | 0.627   | -0.290    | 1e-05            | NA                    | Hypomethylated in FP vs FN |
| cg18841796 | 0.350   | 0.608   | -0.258    | 1e-05            | NA                    | Hypomethylated in FP vs FN |
| cg14239346 | 0.077   | 0.450   | -0.373    | 1e-05            | WDR93_PEX11A          | Hypomethylated in FP vs FN |
| cg19820919 | 0.315   | 0.585   | -0.270    | 1e-05            | NA                    | Hypomethylated in FP vs FN |
| cg01851970 | 0.532   | 0.820   | -0.288    | 1e-05            | NA                    | Hypomethylated in FP vs FN |
| cg08156074 | 0.537   | 0.813   | -0.275    | 1e-05            | NA                    | Hypomethylated in FP vs FN |
| cg05471881 | 0.256   | 0.530   | -0.274    | 1e-05            | NA                    | Hypomethylated in FP vs FN |
| cg14099812 | 0.512   | 0.819   | -0.307    | 1e-05            | NA                    | Hypomethylated in FP vs FN |
| cg14494313 | 0.587   | 0.838   | -0.251    | 1e-05            | NAT2                  | Hypomethylated in FP vs FN |
| cg11789885 | 0.478   | 0.746   | -0.269    | 1e-05            | NA                    | Hypomethylated in FP vs FN |
| cg19906545 | 0.474   | 0.730   | -0.256    | 1e-05            | NA                    | Hypomethylated in FP vs FN |
| cg15317068 | 0.153   | 0.419   | -0.265    | 1e-05            | NA                    | Hypomethylated in FP vs FN |
| cg13786801 | 0.118   | 0.503   | -0.385    | 1e-05            | TACSTD2               | Hypomethylated in FP vs FN |
| cg20967441 | 0.510   | 0.765   | -0.255    | 1e-05            | NA                    | Hypomethylated in FP vs FN |
| cg17104596 | 0.461   | 0.765   | -0.304    | 1e-05            | NA                    | Hypomethylated in FP vs FN |
| cg12417871 | 0.412   | 0.715   | -0.303    | 1e-05            | NA                    | Hypomethylated in FP vs FN |
| cg01751134 | 0.054   | 0.441   | -0.387    | 1e-05            | LPCAT2                | Hypomethylated in FP vs FN |
| cg01528349 | 0.497   | 0.768   | -0.271    | 1e-05            | NA                    | Hypomethylated in FP vs FN |
| cg08466256 | 0.402   | 0.674   | -0.273    | 1e-05            | NA                    | Hypomethylated in FP vs FN |
| cg10062193 | 0.450   | 0.712   | -0.262    | 1e-05            | NA                    | Hypomethylated in FP vs FN |
| cg05873146 | 0.173   | 0.602   | -0.430    | 1e-05            | NA                    | Hypomethylated in FP vs FN |
| cg12159995 | 0.305   | 0.606   | -0.301    | 1e-05            | NA                    | Hypomethylated in FP vs FN |

### Supplementary Table 7 (continued)

| Probe      | FP.mean | FN.mean | Mean.diff | Adjusted.P.value | Promoter.related.gene | Category                   |
|------------|---------|---------|-----------|------------------|-----------------------|----------------------------|
| cg03718773 | 0.222   | 0.481   | -0.258    | 1e-05            | NA                    | Hypomethylated in FP vs FN |
| cg10399929 | 0.448   | 0.738   | -0.291    | 1e-05            | FAT4                  | Hypomethylated in FP vs FN |
| cg20514520 | 0.474   | 0.767   | -0.293    | 1e-05            | NA                    | Hypomethylated in FP vs FN |
| cg16245698 | 0.435   | 0.719   | -0.284    | 1e-05            | NA                    | Hypomethylated in FP vs FN |
| cg01502428 | 0.473   | 0.732   | -0.259    | 1e-05            | NA                    | Hypomethylated in FP vs FN |
| cg13943217 | 0.096   | 0.515   | -0.419    | 1e-05            | NA                    | Hypomethylated in FP vs FN |
| cg24129382 | 0.107   | 0.468   | -0.360    | 1e-05            | NA                    | Hypomethylated in FP vs FN |
| cg08504812 | 0.305   | 0.706   | -0.401    | 1e-05            | C3orf55               | Hypomethylated in FP vs FN |
| cg17092956 | 0.312   | 0.646   | -0.334    | 1e-05            | NA                    | Hypomethylated in FP vs FN |
| cg02464901 | 0.390   | 0.731   | -0.341    | 1e-05            | NA                    | Hypomethylated in FP vs FN |
| cg14714614 | 0.324   | 0.587   | -0.264    | 1e-05            | NA                    | Hypomethylated in FP vs FN |
| cg26453169 | 0.258   | 0.531   | -0.273    | 1e-05            | GAPT                  | Hypomethylated in FP vs FN |
| cg18535456 | 0.315   | 0.655   | -0.340    | 1e-05            | ALDH2                 | Hypomethylated in FP vs FN |
| cg21437481 | 0.205   | 0.582   | -0.377    | 1e-05            | KLHDC9                | Hypomethylated in FP vs FN |
| cg13568950 | 0.095   | 0.407   | -0.312    | 1e-05            | NA                    | Hypomethylated in FP vs FN |
| cg26314750 | 0.405   | 0.696   | -0.291    | 1e-05            | C15orf56              | Hypomethylated in FP vs FN |
| cg20738406 | 0.065   | 0.418   | -0.353    | 1e-05            | WDR93_PEX11A          | Hypomethylated in FP vs FN |
| cg09486642 | 0.348   | 0.642   | -0.294    | 1e-05            | TRPV6                 | Hypomethylated in FP vs FN |
| cg07208057 | 0.375   | 0.687   | -0.312    | 1e-05            | LOC388965             | Hypomethylated in FP vs FN |
| cg03934392 | 0.347   | 0.705   | -0.358    | 1e-05            | LOC402778             | Hypomethylated in FP vs FN |
| cg12835599 | 0.346   | 0.670   | -0.325    | 1e-05            | NA                    | Hypomethylated in FP vs FN |
| cg14207728 | 0.224   | 0.575   | -0.350    | 1e-05            | TCTEX1D1              | Hypomethylated in FP vs FN |
| cg11213690 | 0.218   | 0.567   | -0.349    | 1e-05            | NA                    | Hypomethylated in FP vs FN |
| cg14088142 | 0.155   | 0.426   | -0.271    | 1e-05            | NA                    | Hypomethylated in FP vs FN |
| cg04233521 | 0.335   | 0.586   | -0.251    | 1e-05            | NA                    | Hypomethylated in FP vs FN |

### Supplementary Table 7 (continued)

| Probe      | FP.mean | FN.mean | Mean.diff | Adjusted.P.value | Promoter.related.gene | Category                   |
|------------|---------|---------|-----------|------------------|-----------------------|----------------------------|
| cg26253500 | 0.458   | 0.756   | -0.298    | 1e-05            | NA                    | Hypomethylated in FP vs FN |
| cg07529658 | 0.349   | 0.718   | -0.370    | 1e-05            | NCRNA00175            | Hypomethylated in FP vs FN |
| cg19317211 | 0.082   | 0.483   | -0.401    | 1e-05            | NA                    | Hypomethylated in FP vs FN |
| cg05940984 | 0.092   | 0.502   | -0.411    | 1e-05            | NA                    | Hypomethylated in FP vs FN |
| cg02704158 | 0.292   | 0.671   | -0.379    | 1e-05            | NA                    | Hypomethylated in FP vs FN |
| cg16890796 | 0.261   | 0.579   | -0.318    | 1e-05            | NA                    | Hypomethylated in FP vs FN |
| cg05471169 | 0.139   | 0.497   | -0.358    | 1e-05            | NA                    | Hypomethylated in FP vs FN |
| cg26548251 | 0.286   | 0.545   | -0.259    | 1e-05            | MIR548F3              | Hypomethylated in FP vs FN |
| cg01492523 | 0.469   | 0.757   | -0.288    | 1e-05            | DCHS2                 | Hypomethylated in FP vs FN |
| cg22701056 | 0.410   | 0.711   | -0.301    | 1e-05            | NA                    | Hypomethylated in FP vs FN |
| cg15001714 | 0.508   | 0.785   | -0.277    | 1e-05            | NA                    | Hypomethylated in FP vs FN |
| cg23840044 | 0.514   | 0.778   | -0.263    | 1e-05            | GAS2                  | Hypomethylated in FP vs FN |
| cg05636175 | 0.181   | 0.530   | -0.348    | 1e-05            | TNFRSF10C             | Hypomethylated in FP vs FN |
| cg04418492 | 0.094   | 0.421   | -0.328    | 1e-05            | CYP7B1                | Hypomethylated in FP vs FN |
| cg21399492 | 0.527   | 0.786   | -0.259    | 1e-05            | NA                    | Hypomethylated in FP vs FN |
| cg25094569 | 0.152   | 0.558   | -0.407    | 1e-05            | NA                    | Hypomethylated in FP vs FN |
| cg17820365 | 0.196   | 0.617   | -0.421    | 1e-05            | NA                    | Hypomethylated in FP vs FN |
| cg03238216 | 0.413   | 0.741   | -0.328    | 1e-05            | NA                    | Hypomethylated in FP vs FN |
| cg02222324 | 0.312   | 0.707   | -0.395    | 1e-05            | NA                    | Hypomethylated in FP vs FN |
| cg23118086 | 0.167   | 0.578   | -0.411    | 1e-05            | NA                    | Hypomethylated in FP vs FN |
| cg26479630 | 0.143   | 0.409   | -0.266    | 1e-05            | NA                    | Hypomethylated in FP vs FN |
| cg19905757 | 0.279   | 0.538   | -0.260    | 1e-05            | NA                    | Hypomethylated in FP vs FN |
| cg17850498 | 0.443   | 0.709   | -0.266    | 1e-05            | NA                    | Hypomethylated in FP vs FN |
| cg02543268 | 0.279   | 0.620   | -0.340    | 1e-05            | NA                    | Hypomethylated in FP vs FN |
| cg03876766 | 0.255   | 0.515   | -0.260    | 1e-05            | NA                    | Hypomethylated in FP vs FN |

### Supplementary Table 7 (continued)

| Probe      | FP.mean | FN.mean | Mean.diff | Adjusted.P.value | Promoter.related.gene | Category                   |
|------------|---------|---------|-----------|------------------|-----------------------|----------------------------|
| cg07901253 | 0.295   | 0.555   | -0.260    | 1e-05            | NA                    | Hypomethylated in FP vs FN |
| cg09941208 | 0.367   | 0.639   | -0.272    | 1e-05            | NA                    | Hypomethylated in FP vs FN |
| cg02561009 | 0.590   | 0.842   | -0.253    | 1e-05            | NA                    | Hypomethylated in FP vs FN |
| cg00966141 | 0.515   | 0.773   | -0.258    | 1e-05            | NA                    | Hypomethylated in FP vs FN |
| cg23111106 | 0.408   | 0.720   | -0.312    | 1e-05            | NA                    | Hypomethylated in FP vs FN |
| cg11191210 | 0.450   | 0.798   | -0.349    | 1e-05            | VGLL2                 | Hypomethylated in FP vs FN |
| cg11435225 | 0.485   | 0.740   | -0.255    | 1e-05            | NA                    | Hypomethylated in FP vs FN |
| cg07918545 | 0.199   | 0.621   | -0.422    | 1e-05            | FOXI2                 | Hypomethylated in FP vs FN |
| cg10655471 | 0.339   | 0.685   | -0.346    | 1e-05            | NA                    | Hypomethylated in FP vs FN |
| cg06729806 | 0.287   | 0.594   | -0.307    | 1e-05            | NA                    | Hypomethylated in FP vs FN |
| cg17530965 | 0.592   | 0.898   | -0.306    | 1e-05            | NA                    | Hypomethylated in FP vs FN |
| cg21113846 | 0.291   | 0.561   | -0.270    | 1e-05            | NA                    | Hypomethylated in FP vs FN |
| cg12079699 | 0.344   | 0.620   | -0.276    | 1e-05            | NA                    | Hypomethylated in FP vs FN |
| cg04602007 | 0.253   | 0.564   | -0.311    | 1e-05            | NA                    | Hypomethylated in FP vs FN |
| cg22687077 | 0.563   | 0.830   | -0.266    | 1e-05            | NA                    | Hypomethylated in FP vs FN |
| cg13605615 | 0.417   | 0.687   | -0.270    | 1e-05            | DIRAS3                | Hypomethylated in FP vs FN |
| cg12073016 | 0.391   | 0.666   | -0.276    | 1e-05            | CRABP1                | Hypomethylated in FP vs FN |
| cg15030449 | 0.142   | 0.535   | -0.393    | 1e-05            | NA                    | Hypomethylated in FP vs FN |
| cg15763823 | 0.344   | 0.600   | -0.255    | 1e-05            | NA                    | Hypomethylated in FP vs FN |
| cg07736716 | 0.379   | 0.673   | -0.294    | 1e-05            | CA1                   | Hypomethylated in FP vs FN |
| cg08431709 | 0.487   | 0.750   | -0.262    | 1e-05            | NA                    | Hypomethylated in FP vs FN |
| cg24009656 | 0.315   | 0.646   | -0.331    | 1e-05            | NA                    | Hypomethylated in FP vs FN |
| cg01783730 | 0.387   | 0.734   | -0.347    | 1e-05            | NA                    | Hypomethylated in FP vs FN |
| cg15584954 | 0.343   | 0.641   | -0.297    | 1e-05            | NA                    | Hypomethylated in FP vs FN |
| cg22307444 | 0.414   | 0.713   | -0.299    | 1e-05            | NA                    | Hypomethylated in FP vs FN |

### Supplementary Table 7 (continued)

| Probe      | FP.mean | FN.mean | Mean.diff | Adjusted.P.value | Promoter.related.gene | Category                   |
|------------|---------|---------|-----------|------------------|-----------------------|----------------------------|
| cg00349404 | 0.311   | 0.563   | -0.252    | 1e-05            | NA                    | Hypomethylated in FP vs FN |
| cg14509967 | 0.245   | 0.587   | -0.342    | 1e-05            | NA                    | Hypomethylated in FP vs FN |
| cg03599774 | 0.492   | 0.806   | -0.313    | 1e-05            | NA                    | Hypomethylated in FP vs FN |
| cg00491255 | 0.251   | 0.636   | -0.384    | 1e-05            | NA                    | Hypomethylated in FP vs FN |
| cg09255473 | 0.437   | 0.764   | -0.327    | 1e-05            | SDK1                  | Hypomethylated in FP vs FN |
| cg03018634 | 0.535   | 0.806   | -0.272    | 1e-05            | NA                    | Hypomethylated in FP vs FN |
| cg05328547 | 0.214   | 0.572   | -0.358    | 1e-05            | FERD3L                | Hypomethylated in FP vs FN |
| cg17718960 | 0.403   | 0.685   | -0.282    | 1e-05            | NA                    | Hypomethylated in FP vs FN |
| cg00292971 | 0.412   | 0.716   | -0.304    | 1e-05            | FAM131B               | Hypomethylated in FP vs FN |
| cg26681139 | 0.362   | 0.669   | -0.307    | 1e-05            | NA                    | Hypomethylated in FP vs FN |
| cg05833067 | 0.454   | 0.747   | -0.293    | 1e-05            | NA                    | Hypomethylated in FP vs FN |
| cg06775073 | 0.384   | 0.717   | -0.333    | 1e-05            | NA                    | Hypomethylated in FP vs FN |
| cg17754473 | 0.472   | 0.785   | -0.312    | 1e-05            | NA                    | Hypomethylated in FP vs FN |
| cg09290893 | 0.491   | 0.759   | -0.268    | 1e-05            | NA                    | Hypomethylated in FP vs FN |
| cg05693450 | 0.538   | 0.817   | -0.279    | 1e-05            | KCNU1                 | Hypomethylated in FP vs FN |
| cg04874580 | 0.407   | 0.729   | -0.322    | 1e-05            | NA                    | Hypomethylated in FP vs FN |
| cg08106205 | 0.481   | 0.798   | -0.317    | 1e-05            | NA                    | Hypomethylated in FP vs FN |
| cg25340403 | 0.453   | 0.731   | -0.278    | 1e-05            | LYPD3                 | Hypomethylated in FP vs FN |
| cg00268685 | 0.530   | 0.782   | -0.252    | 1e-05            | CHST14                | Hypomethylated in FP vs FN |
| cg16947791 | 0.433   | 0.723   | -0.289    | 1e-05            | NA                    | Hypomethylated in FP vs FN |
| cg05132150 | 0.404   | 0.730   | -0.326    | 1e-05            | NA                    | Hypomethylated in FP vs FN |
| cg13432945 | 0.316   | 0.601   | -0.285    | 1e-05            | NA                    | Hypomethylated in FP vs FN |
| cg04197847 | 0.446   | 0.748   | -0.302    | 1e-05            | NA                    | Hypomethylated in FP vs FN |
| cg27203895 | 0.487   | 0.760   | -0.273    | 1e-05            | NA                    | Hypomethylated in FP vs FN |
| cg24426778 | 0.478   | 0.793   | -0.315    | 1e-05            | NA                    | Hypomethylated in FP vs FN |



### Supplementary Table 7 (continued)

| Probe      | FP.mean | FN.mean | Mean.diff | Adjusted.P.value | Promoter.related.gene | Category                   |
|------------|---------|---------|-----------|------------------|-----------------------|----------------------------|
| cg24583452 | 0.488   | 0.769   | -0.281    | 1e-05            | NA                    | Hypomethylated in FP vs FN |
| cg16882206 | 0.550   | 0.822   | -0.272    | 1e-05            | NA                    | Hypomethylated in FP vs FN |
| cg12837463 | 0.351   | 0.638   | -0.287    | 1e-05            | NA                    | Hypomethylated in FP vs FN |
| cg01192900 | 0.138   | 0.511   | -0.372    | 1e-05            | BTG4_MIR34C           | Hypomethylated in FP vs FN |
| cg11147866 | 0.432   | 0.732   | -0.300    | 1e-05            | NA                    | Hypomethylated in FP vs FN |
| cg13865347 | 0.460   | 0.752   | -0.292    | 1e-05            | NA                    | Hypomethylated in FP vs FN |
| cg15631458 | 0.194   | 0.456   | -0.263    | 1e-05            | NA                    | Hypomethylated in FP vs FN |
| cg07891533 | 0.191   | 0.453   | -0.262    | 1e-05            | NA                    | Hypomethylated in FP vs FN |
| cg18996760 | 0.607   | 0.884   | -0.277    | 1e-05            | NA                    | Hypomethylated in FP vs FN |
| cg19908556 | 0.077   | 0.484   | -0.407    | 1e-05            | NA                    | Hypomethylated in FP vs FN |
| cg08814405 | 0.202   | 0.540   | -0.339    | 1e-05            | NA                    | Hypomethylated in FP vs FN |
| cg05065507 | 0.241   | 0.677   | -0.436    | 1e-05            | TACSTD2               | Hypomethylated in FP vs FN |
| cg15706250 | 0.268   | 0.546   | -0.279    | 1e-05            | NA                    | Hypomethylated in FP vs FN |
| cg11418595 | 0.305   | 0.583   | -0.278    | 1e-05            | HOXD1                 | Hypomethylated in FP vs FN |
| cg12259537 | 0.133   | 0.416   | -0.283    | 1e-05            | ZNF606                | Hypomethylated in FP vs FN |
| cg20934839 | 0.369   | 0.662   | -0.293    | 1e-05            | NA                    | Hypomethylated in FP vs FN |
| cg02872868 | 0.323   | 0.648   | -0.325    | 1e-05            | NA                    | Hypomethylated in FP vs FN |
| cg14546128 | 0.282   | 0.627   | -0.344    | 1e-05            | NA                    | Hypomethylated in FP vs FN |
| cg19594666 | 0.333   | 0.739   | -0.406    | 1e-05            | LEP                   | Hypomethylated in FP vs FN |
| cg13897241 | 0.446   | 0.720   | -0.274    | 1e-05            | FLJ39609              | Hypomethylated in FP vs FN |
| cg08238568 | 0.432   | 0.755   | -0.322    | 1e-05            | NA                    | Hypomethylated in FP vs FN |
| cg23012591 | 0.446   | 0.745   | -0.299    | 1e-05            | NA                    | Hypomethylated in FP vs FN |
| cg04385236 | 0.133   | 0.543   | -0.410    | 1e-05            | C3orf55               | Hypomethylated in FP vs FN |
| cg21708692 | 0.330   | 0.681   | -0.352    | 1e-05            | NA                    | Hypomethylated in FP vs FN |
| cg22526990 | 0.354   | 0.613   | -0.258    | 1e-05            | NA                    | Hypomethylated in FP vs FN |

### Supplementary Table 7 (continued)

| Probe      | FP.mean | FN.mean | Mean.diff | Adjusted.P.value | Promoter.related.gene | Category                   |
|------------|---------|---------|-----------|------------------|-----------------------|----------------------------|
| cg19568544 | 0.351   | 0.696   | -0.345    | 1e-05            | PCDHB5                | Hypomethylated in FP vs FN |
| cg14769021 | 0.355   | 0.625   | -0.269    | 1e-05            | NA                    | Hypomethylated in FP vs FN |
| cg22431753 | 0.377   | 0.683   | -0.305    | 1e-05            | NA                    | Hypomethylated in FP vs FN |
| cg02527190 | 0.579   | 0.832   | -0.253    | 1e-05            | SLC27A6               | Hypomethylated in FP vs FN |
| cg24181389 | 0.427   | 0.712   | -0.285    | 1e-05            | NA                    | Hypomethylated in FP vs FN |
| cg24483554 | 0.387   | 0.679   | -0.292    | 1e-05            | NA                    | Hypomethylated in FP vs FN |
| cg13206556 | 0.283   | 0.534   | -0.251    | 1e-05            | NA                    | Hypomethylated in FP vs FN |
| cg00422120 | 0.266   | 0.530   | -0.265    | 1e-05            | NA                    | Hypomethylated in FP vs FN |
| cg26079753 | 0.294   | 0.728   | -0.434    | 1e-05            | NA                    | Hypomethylated in FP vs FN |
| cg05465059 | 0.572   | 0.823   | -0.251    | 1e-05            | NA                    | Hypomethylated in FP vs FN |
| cg15001056 | 0.457   | 0.758   | -0.301    | 1e-05            | NA                    | Hypomethylated in FP vs FN |
| cg01271423 | 0.536   | 0.786   | -0.250    | 1e-05            | NA                    | Hypomethylated in FP vs FN |
| cg00835857 | 0.338   | 0.619   | -0.281    | 1e-05            | SPATC1                | Hypomethylated in FP vs FN |
| cg11199046 | 0.185   | 0.532   | -0.346    | 1e-05            | NA                    | Hypomethylated in FP vs FN |
| cg03295542 | 0.286   | 0.615   | -0.329    | 1e-05            | NA                    | Hypomethylated in FP vs FN |
| cg09254322 | 0.247   | 0.570   | -0.323    | 1e-05            | NA                    | Hypomethylated in FP vs FN |
| cg13401840 | 0.399   | 0.683   | -0.284    | 2e-05            | NA                    | Hypomethylated in FP vs FN |
| cg23359363 | 0.405   | 0.751   | -0.346    | 2e-05            | NA                    | Hypomethylated in FP vs FN |
| cg18712566 | 0.382   | 0.699   | -0.316    | 2e-05            | NA                    | Hypomethylated in FP vs FN |
| cg25603587 | 0.295   | 0.549   | -0.254    | 2e-05            | NA                    | Hypomethylated in FP vs FN |
| cg03826564 | 0.291   | 0.591   | -0.300    | 2e-05            | NA                    | Hypomethylated in FP vs FN |
| cg13434142 | 0.451   | 0.712   | -0.261    | 2e-05            | NA                    | Hypomethylated in FP vs FN |
| cg21334598 | 0.137   | 0.509   | -0.372    | 2e-05            | NA                    | Hypomethylated in FP vs FN |
| cg15645203 | 0.286   | 0.602   | -0.316    | 2e-05            | NA                    | Hypomethylated in FP vs FN |
| cg02081266 | 0.287   | 0.689   | -0.402    | 2e-05            | NA                    | Hypomethylated in FP vs FN |

### Supplementary Table 7 (continued)

| Probe      | FP.mean | FN.mean | Mean.diff | Adjusted.P.value | Promoter.related.gene | Category                   |
|------------|---------|---------|-----------|------------------|-----------------------|----------------------------|
| cg23330212 | 0.254   | 0.552   | -0.298    | 2e-05            | NA                    | Hypomethylated in FP vs FN |
| cg03009158 | 0.143   | 0.445   | -0.302    | 2e-05            | NA                    | Hypomethylated in FP vs FN |
| cg08319905 | 0.512   | 0.778   | -0.266    | 2e-05            | NA                    | Hypomethylated in FP vs FN |
| cg11263011 | 0.436   | 0.753   | -0.317    | 2e-05            | MIR195_MIR497         | Hypomethylated in FP vs FN |
| cg07962338 | 0.216   | 0.567   | -0.351    | 2e-05            | NA                    | Hypomethylated in FP vs FN |
| cg04557197 | 0.235   | 0.618   | -0.383    | 2e-05            | NA                    | Hypomethylated in FP vs FN |
| cg02906503 | 0.430   | 0.686   | -0.256    | 2e-05            | NA                    | Hypomethylated in FP vs FN |
| cg11654024 | 0.169   | 0.425   | -0.255    | 2e-05            | NA                    | Hypomethylated in FP vs FN |
| cg14006798 | 0.353   | 0.643   | -0.290    | 2e-05            | NA                    | Hypomethylated in FP vs FN |
| cg01622385 | 0.260   | 0.536   | -0.276    | 2e-05            | NA                    | Hypomethylated in FP vs FN |
| cg26458775 | 0.598   | 0.853   | -0.255    | 2e-05            | NA                    | Hypomethylated in FP vs FN |
| cg19783160 | 0.487   | 0.755   | -0.268    | 2e-05            | NA                    | Hypomethylated in FP vs FN |
| cg02399524 | 0.179   | 0.507   | -0.328    | 2e-05            | HRASLS5               | Hypomethylated in FP vs FN |
| cg04442017 | 0.462   | 0.742   | -0.280    | 2e-05            | NA                    | Hypomethylated in FP vs FN |
| cg24915915 | 0.417   | 0.678   | -0.261    | 2e-05            | NA                    | Hypomethylated in FP vs FN |
| cg01078582 | 0.382   | 0.675   | -0.293    | 2e-05            | NA                    | Hypomethylated in FP vs FN |
| cg04895288 | 0.237   | 0.647   | -0.410    | 2e-05            | NA                    | Hypomethylated in FP vs FN |
| cg17361896 | 0.306   | 0.644   | -0.338    | 2e-05            | NA                    | Hypomethylated in FP vs FN |
| cg24252695 | 0.464   | 0.764   | -0.300    | 2e-05            | NA                    | Hypomethylated in FP vs FN |
| cg25851313 | 0.410   | 0.717   | -0.307    | 2e-05            | FAM131C               | Hypomethylated in FP vs FN |
| cg07754492 | 0.234   | 0.520   | -0.286    | 2e-05            | CASP10                | Hypomethylated in FP vs FN |
| cg20963030 | 0.309   | 0.645   | -0.337    | 2e-05            | ATP10B                | Hypomethylated in FP vs FN |
| cg21775463 | 0.338   | 0.611   | -0.274    | 2e-05            | NA                    | Hypomethylated in FP vs FN |
| cg00135497 | 0.248   | 0.576   | -0.328    | 2e-05            | NA                    | Hypomethylated in FP vs FN |
| cg23849078 | 0.058   | 0.444   | -0.386    | 2e-05            | NA                    | Hypomethylated in FP vs FN |

### Supplementary Table 7 (continued)

| Probe      | FP.mean | FN.mean | Mean.diff | Adjusted.P.value | Promoter.related.gene | Category                   |
|------------|---------|---------|-----------|------------------|-----------------------|----------------------------|
| cg15373592 | 0.357   | 0.664   | -0.307    | 2e-05            | NA                    | Hypomethylated in FP vs FN |
| cg24587080 | 0.320   | 0.624   | -0.304    | 2e-05            | NA                    | Hypomethylated in FP vs FN |
| cg25562664 | 0.194   | 0.464   | -0.269    | 2e-05            | NA                    | Hypomethylated in FP vs FN |
| cg16440058 | 0.187   | 0.630   | -0.442    | 2e-05            | NA                    | Hypomethylated in FP vs FN |
| cg01582937 | 0.475   | 0.776   | -0.301    | 2e-05            | NA                    | Hypomethylated in FP vs FN |
| cg01914838 | 0.571   | 0.881   | -0.310    | 2e-05            | NA                    | Hypomethylated in FP vs FN |
| cg13888593 | 0.186   | 0.591   | -0.405    | 2e-05            | NA                    | Hypomethylated in FP vs FN |
| cg04269530 | 0.299   | 0.580   | -0.281    | 2e-05            | NA                    | Hypomethylated in FP vs FN |
| cg04107003 | 0.271   | 0.524   | -0.252    | 2e-05            | NA                    | Hypomethylated in FP vs FN |
| cg08711281 | 0.489   | 0.786   | -0.297    | 2e-05            | DPCR1                 | Hypomethylated in FP vs FN |
| cg03670736 | 0.476   | 0.786   | -0.310    | 2e-05            | NA                    | Hypomethylated in FP vs FN |
| cg11651209 | 0.421   | 0.732   | -0.311    | 2e-05            | NA                    | Hypomethylated in FP vs FN |
| cg26690075 | 0.342   | 0.716   | -0.374    | 2e-05            | WNT16                 | Hypomethylated in FP vs FN |
| cg14873600 | 0.278   | 0.615   | -0.337    | 2e-05            | NA                    | Hypomethylated in FP vs FN |
| cg19251161 | 0.486   | 0.745   | -0.259    | 2e-05            | ITPRIP                | Hypomethylated in FP vs FN |
| cg19609912 | 0.413   | 0.695   | -0.282    | 2e-05            | NA                    | Hypomethylated in FP vs FN |
| cg16223863 | 0.130   | 0.400   | -0.269    | 2e-05            | ADRB3                 | Hypomethylated in FP vs FN |
| cg03932723 | 0.159   | 0.509   | -0.351    | 2e-05            | HRASLS5               | Hypomethylated in FP vs FN |
| cg22333412 | 0.479   | 0.762   | -0.282    | 2e-05            | NA                    | Hypomethylated in FP vs FN |
| cg04074536 | 0.468   | 0.805   | -0.337    | 2e-05            | NA                    | Hypomethylated in FP vs FN |
| cg10362172 | 0.279   | 0.657   | -0.378    | 2e-05            | NA                    | Hypomethylated in FP vs FN |
| cg04265492 | 0.348   | 0.616   | -0.267    | 2e-05            | NA                    | Hypomethylated in FP vs FN |
| cg26010877 | 0.416   | 0.803   | -0.387    | 2e-05            | NA                    | Hypomethylated in FP vs FN |
| cg10347335 | 0.272   | 0.688   | -0.416    | 2e-05            | TACSTD2               | Hypomethylated in FP vs FN |
| cg16896313 | 0.361   | 0.646   | -0.285    | 2e-05            | NA                    | Hypomethylated in FP vs FN |

### Supplementary Table 7 (continued)

| Probe      | FP.mean | FN.mean | Mean.diff | Adjusted.P.value | Promoter.related.gene | Category                   |
|------------|---------|---------|-----------|------------------|-----------------------|----------------------------|
| cg11939450 | 0.433   | 0.707   | -0.274    | 2e-05            | NA                    | Hypomethylated in FP vs FN |
| cg09600715 | 0.304   | 0.561   | -0.257    | 2e-05            | NA                    | Hypomethylated in FP vs FN |
| cg08668316 | 0.288   | 0.607   | -0.319    | 2e-05            | NA                    | Hypomethylated in FP vs FN |
| cg24979093 | 0.434   | 0.758   | -0.325    | 2e-05            | DSCR10                | Hypomethylated in FP vs FN |
| cg12505170 | 0.163   | 0.581   | -0.419    | 2e-05            | NA                    | Hypomethylated in FP vs FN |
| cg13859860 | 0.508   | 0.780   | -0.271    | 2e-05            | NA                    | Hypomethylated in FP vs FN |
| cg10410483 | 0.505   | 0.763   | -0.258    | 2e-05            | NA                    | Hypomethylated in FP vs FN |
| cg22280705 | 0.130   | 0.480   | -0.350    | 2e-05            | GALNT3                | Hypomethylated in FP vs FN |
| cg15416643 | 0.281   | 0.657   | -0.376    | 2e-05            | NA                    | Hypomethylated in FP vs FN |
| cg09556826 | 0.421   | 0.804   | -0.383    | 2e-05            | NA                    | Hypomethylated in FP vs FN |
| cg23157618 | 0.398   | 0.715   | -0.317    | 2e-05            | NA                    | Hypomethylated in FP vs FN |
| cg00742738 | 0.590   | 0.852   | -0.262    | 2e-05            | NA                    | Hypomethylated in FP vs FN |
| cg08731067 | 0.393   | 0.702   | -0.309    | 2e-05            | NA                    | Hypomethylated in FP vs FN |
| cg05413277 | 0.194   | 0.530   | -0.335    | 2e-05            | NA                    | Hypomethylated in FP vs FN |
| cg05801879 | 0.460   | 0.715   | -0.255    | 2e-05            | NA                    | Hypomethylated in FP vs FN |
| cg24307102 | 0.247   | 0.573   | -0.326    | 2e-05            | NA                    | Hypomethylated in FP vs FN |
| cg04659582 | 0.148   | 0.406   | -0.259    | 2e-05            | NA                    | Hypomethylated in FP vs FN |
| cg12324708 | 0.301   | 0.665   | -0.364    | 2e-05            | NA                    | Hypomethylated in FP vs FN |
| cg26368431 | 0.410   | 0.693   | -0.283    | 2e-05            | NA                    | Hypomethylated in FP vs FN |
| cg08876039 | 0.440   | 0.745   | -0.305    | 2e-05            | NA                    | Hypomethylated in FP vs FN |
| cg07648238 | 0.151   | 0.584   | -0.433    | 2e-05            | LTBR                  | Hypomethylated in FP vs FN |
| cg23586959 | 0.274   | 0.583   | -0.309    | 2e-05            | NCRNA00028            | Hypomethylated in FP vs FN |
| cg09628704 | 0.391   | 0.726   | -0.335    | 2e-05            | NA                    | Hypomethylated in FP vs FN |
| cg19634213 | 0.111   | 0.496   | -0.386    | 2e-05            | PTEN_KILLIN           | Hypomethylated in FP vs FN |
| cg03224627 | 0.364   | 0.643   | -0.279    | 2e-05            | NA                    | Hypomethylated in FP vs FN |

### Supplementary Table 7 (continued)

| Probe      | FP.mean | FN.mean | Mean.diff | Adjusted.P.value | Promoter.related.gene | Category                   |
|------------|---------|---------|-----------|------------------|-----------------------|----------------------------|
| cg04655481 | 0.180   | 0.457   | -0.277    | 2e-05            | GPR21                 | Hypomethylated in FP vs FN |
| cg03078269 | 0.336   | 0.767   | -0.431    | 2e-05            | NA                    | Hypomethylated in FP vs FN |
| cg26945725 | 0.501   | 0.757   | -0.256    | 2e-05            | NA                    | Hypomethylated in FP vs FN |
| cg09571369 | 0.455   | 0.763   | -0.308    | 2e-05            | P2RY14                | Hypomethylated in FP vs FN |
| cg13947995 | 0.127   | 0.501   | -0.374    | 2e-05            | FES                   | Hypomethylated in FP vs FN |
| cg05712125 | 0.468   | 0.772   | -0.304    | 2e-05            | NA                    | Hypomethylated in FP vs FN |
| cg25203627 | 0.347   | 0.633   | -0.286    | 2e-05            | NA                    | Hypomethylated in FP vs FN |
| cg21502834 | 0.384   | 0.724   | -0.339    | 2e-05            | TFAP2B                | Hypomethylated in FP vs FN |
| cg16373526 | 0.433   | 0.702   | -0.269    | 2e-05            | NA                    | Hypomethylated in FP vs FN |
| cg02466815 | 0.319   | 0.648   | -0.329    | 2e-05            | NA                    | Hypomethylated in FP vs FN |
| cg02757236 | 0.548   | 0.821   | -0.273    | 2e-05            | ERMN                  | Hypomethylated in FP vs FN |
| cg17334762 | 0.301   | 0.719   | -0.418    | 2e-05            | NA                    | Hypomethylated in FP vs FN |
| cg27252467 | 0.425   | 0.734   | -0.309    | 2e-05            | NA                    | Hypomethylated in FP vs FN |
| cg21503904 | 0.410   | 0.714   | -0.304    | 2e-05            | NA                    | Hypomethylated in FP vs FN |
| cg02593884 | 0.379   | 0.657   | -0.278    | 2e-05            | NA                    | Hypomethylated in FP vs FN |
| cg07709210 | 0.400   | 0.676   | -0.276    | 2e-05            | PGC                   | Hypomethylated in FP vs FN |
| cg07380095 | 0.224   | 0.520   | -0.296    | 2e-05            | PLEKHG1               | Hypomethylated in FP vs FN |
| cg15017004 | 0.152   | 0.594   | -0.442    | 2e-05            | NA                    | Hypomethylated in FP vs FN |
| cg09516476 | 0.117   | 0.413   | -0.296    | 2e-05            | NA                    | Hypomethylated in FP vs FN |
| cg03396005 | 0.628   | 0.878   | -0.250    | 2e-05            | NA                    | Hypomethylated in FP vs FN |
| cg22785852 | 0.340   | 0.631   | -0.291    | 2e-05            | NA                    | Hypomethylated in FP vs FN |
| cg27384695 | 0.331   | 0.671   | -0.341    | 2e-05            | NA                    | Hypomethylated in FP vs FN |
| cg15664152 | 0.456   | 0.706   | -0.251    | 2e-05            | NA                    | Hypomethylated in FP vs FN |
| cg03353445 | 0.256   | 0.532   | -0.276    | 2e-05            | GPRC5A                | Hypomethylated in FP vs FN |
| cg25194822 | 0.140   | 0.420   | -0.279    | 2e-05            | NA                    | Hypomethylated in FP vs FN |

### Supplementary Table 7 (continued)

| Probe      | FP.mean | FN.mean | Mean.diff | Adjusted.P.value | Promoter.related.gene | Category                   |
|------------|---------|---------|-----------|------------------|-----------------------|----------------------------|
| cg02671204 | 0.539   | 0.827   | -0.288    | 2e-05            | SLC38A8               | Hypomethylated in FP vs FN |
| cg27208169 | 0.425   | 0.727   | -0.302    | 2e-05            | NA                    | Hypomethylated in FP vs FN |
| cg01014615 | 0.461   | 0.786   | -0.325    | 2e-05            | HOXD3                 | Hypomethylated in FP vs FN |
| cg22628281 | 0.150   | 0.501   | -0.351    | 2e-05            | NA                    | Hypomethylated in FP vs FN |
| cg17295573 | 0.467   | 0.731   | -0.264    | 2e-05            | NA                    | Hypomethylated in FP vs FN |
| cg04636841 | 0.218   | 0.591   | -0.373    | 2e-05            | NA                    | Hypomethylated in FP vs FN |
| cg25464921 | 0.183   | 0.606   | -0.423    | 2e-05            | NA                    | Hypomethylated in FP vs FN |
| cg06538870 | 0.411   | 0.713   | -0.303    | 2e-05            | SERPINB13             | Hypomethylated in FP vs FN |
| cg21786289 | 0.381   | 0.664   | -0.283    | 2e-05            | FLJ39609              | Hypomethylated in FP vs FN |
| cg00403251 | 0.395   | 0.690   | -0.294    | 2e-05            | NA                    | Hypomethylated in FP vs FN |
| cg05210558 | 0.424   | 0.753   | -0.329    | 2e-05            | NA                    | Hypomethylated in FP vs FN |
| cg02150135 | 0.180   | 0.469   | -0.288    | 2e-05            | POM121L2              | Hypomethylated in FP vs FN |
| cg17914485 | 0.489   | 0.782   | -0.292    | 2e-05            | NA                    | Hypomethylated in FP vs FN |
| cg01171212 | 0.433   | 0.705   | -0.272    | 2e-05            | NA                    | Hypomethylated in FP vs FN |
| cg00034559 | 0.406   | 0.710   | -0.304    | 2e-05            | TMEM178               | Hypomethylated in FP vs FN |
| cg25038317 | 0.349   | 0.714   | -0.366    | 2e-05            | NA                    | Hypomethylated in FP vs FN |
| cg08465774 | 0.528   | 0.802   | -0.274    | 2e-05            | NA                    | Hypomethylated in FP vs FN |
| cg19235339 | 0.103   | 0.504   | -0.401    | 2e-05            | RNLS                  | Hypomethylated in FP vs FN |
| cg09372750 | 0.402   | 0.684   | -0.281    | 2e-05            | SLC22A17              | Hypomethylated in FP vs FN |
| cg17775765 | 0.450   | 0.720   | -0.269    | 2e-05            | NA                    | Hypomethylated in FP vs FN |
| cg11062798 | 0.453   | 0.722   | -0.269    | 2e-05            | MUC21                 | Hypomethylated in FP vs FN |
| cg03861347 | 0.330   | 0.612   | -0.282    | 2e-05            | NA                    | Hypomethylated in FP vs FN |
| cg05242915 | 0.400   | 0.679   | -0.279    | 2e-05            | NA                    | Hypomethylated in FP vs FN |
| cg13630878 | 0.401   | 0.677   | -0.277    | 2e-05            | NA                    | Hypomethylated in FP vs FN |
| cg07330481 | 0.329   | 0.732   | -0.403    | 2e-05            | ARL5C                 | Hypomethylated in FP vs FN |

### Supplementary Table 7 (continued)

| Probe      | FP.mean | FN.mean | Mean.diff | Adjusted.P.value | Promoter.related.gene | Category                   |
|------------|---------|---------|-----------|------------------|-----------------------|----------------------------|
| cg07526656 | 0.225   | 0.495   | -0.270    | 2e-05            | LOC283314             | Hypomethylated in FP vs FN |
| cg07147449 | 0.094   | 0.495   | -0.401    | 2e-05            | NA                    | Hypomethylated in FP vs FN |
| cg02330721 | 0.557   | 0.810   | -0.253    | 2e-05            | NA                    | Hypomethylated in FP vs FN |
| cg18021368 | 0.290   | 0.658   | -0.368    | 2e-05            | PCDHB5                | Hypomethylated in FP vs FN |
| cg18865990 | 0.391   | 0.683   | -0.292    | 2e-05            | NA                    | Hypomethylated in FP vs FN |
| cg15065169 | 0.545   | 0.803   | -0.258    | 2e-05            | NA                    | Hypomethylated in FP vs FN |
| cg10318528 | 0.311   | 0.624   | -0.313    | 2e-05            | NA                    | Hypomethylated in FP vs FN |
| cg07091758 | 0.261   | 0.545   | -0.284    | 2e-05            | PKD1L2                | Hypomethylated in FP vs FN |
| cg10002185 | 0.584   | 0.851   | -0.267    | 2e-05            | NA                    | Hypomethylated in FP vs FN |
| cg21213426 | 0.498   | 0.774   | -0.275    | 2e-05            | NA                    | Hypomethylated in FP vs FN |
| cg10288921 | 0.545   | 0.822   | -0.276    | 2e-05            | NA                    | Hypomethylated in FP vs FN |
| cg14356608 | 0.255   | 0.622   | -0.367    | 2e-05            | NA                    | Hypomethylated in FP vs FN |
| cg10043037 | 0.128   | 0.387   | -0.260    | 2e-05            | FERD3L                | Hypomethylated in FP vs FN |
| cg07857792 | 0.147   | 0.437   | -0.290    | 2e-05            | KCNN1                 | Hypomethylated in FP vs FN |
| cg04351205 | 0.336   | 0.679   | -0.343    | 2e-05            | ARHGAP15              | Hypomethylated in FP vs FN |
| cg06035250 | 0.511   | 0.785   | -0.273    | 2e-05            | ALPL                  | Hypomethylated in FP vs FN |
| cg18842563 | 0.189   | 0.513   | -0.324    | 2e-05            | NA                    | Hypomethylated in FP vs FN |
| cg27452341 | 0.087   | 0.421   | -0.334    | 2e-05            | NA                    | Hypomethylated in FP vs FN |
| cg24329557 | 0.317   | 0.573   | -0.256    | 2e-05            | GCM2                  | Hypomethylated in FP vs FN |
| cg27354537 | 0.296   | 0.629   | -0.333    | 2e-05            | NA                    | Hypomethylated in FP vs FN |
| cg10291141 | 0.109   | 0.387   | -0.278    | 2e-05            | NHLRC1                | Hypomethylated in FP vs FN |
| cg02904657 | 0.326   | 0.617   | -0.291    | 2e-05            | NA                    | Hypomethylated in FP vs FN |
| cg03350154 | 0.498   | 0.756   | -0.259    | 2e-05            | NA                    | Hypomethylated in FP vs FN |
| cg19791637 | 0.410   | 0.679   | -0.269    | 2e-05            | NA                    | Hypomethylated in FP vs FN |
| cg12750031 | 0.488   | 0.771   | -0.283    | 2e-05            | NA                    | Hypomethylated in FP vs FN |



### Supplementary Table 7 (continued)

| Probe      | FP.mean | FN.mean | Mean.diff | Adjusted.P.value | Promoter.related.gene | Category                   |
|------------|---------|---------|-----------|------------------|-----------------------|----------------------------|
| cg03569068 | 0.524   | 0.832   | -0.308    | 2e-05            | NA                    | Hypomethylated in FP vs FN |
| cg18127481 | 0.333   | 0.664   | -0.330    | 2e-05            | NA                    | Hypomethylated in FP vs FN |
| cg07136554 | 0.486   | 0.752   | -0.266    | 2e-05            | NA                    | Hypomethylated in FP vs FN |
| cg14288066 | 0.600   | 0.851   | -0.250    | 2e-05            | NA                    | Hypomethylated in FP vs FN |
| cg07435275 | 0.215   | 0.468   | -0.254    | 2e-05            | NA                    | Hypomethylated in FP vs FN |
| cg10089801 | 0.244   | 0.594   | -0.351    | 2e-05            | NA                    | Hypomethylated in FP vs FN |
| cg19475988 | 0.386   | 0.749   | -0.364    | 2e-05            | NA                    | Hypomethylated in FP vs FN |
| cg06160606 | 0.566   | 0.841   | -0.275    | 2e-05            | NA                    | Hypomethylated in FP vs FN |
| cg07290920 | 0.226   | 0.546   | -0.320    | 2e-05            | NA                    | Hypomethylated in FP vs FN |
| cg12046677 | 0.485   | 0.775   | -0.290    | 2e-05            | NA                    | Hypomethylated in FP vs FN |
| cg10774282 | 0.504   | 0.785   | -0.281    | 2e-05            | SLC1A7                | Hypomethylated in FP vs FN |
| cg22632523 | 0.311   | 0.590   | -0.279    | 2e-05            | NA                    | Hypomethylated in FP vs FN |
| cg07169289 | 0.584   | 0.850   | -0.267    | 2e-05            | NA                    | Hypomethylated in FP vs FN |
| cg26104815 | 0.450   | 0.750   | -0.299    | 2e-05            | NA                    | Hypomethylated in FP vs FN |
| cg19938167 | 0.470   | 0.765   | -0.295    | 2e-05            | NA                    | Hypomethylated in FP vs FN |
| cg19656282 | 0.427   | 0.752   | -0.326    | 2e-05            | NA                    | Hypomethylated in FP vs FN |
| cg10968944 | 0.363   | 0.626   | -0.263    | 2e-05            | NA                    | Hypomethylated in FP vs FN |
| cg14359824 | 0.262   | 0.631   | -0.369    | 2e-05            | C9orf135              | Hypomethylated in FP vs FN |
| cg01160452 | 0.507   | 0.761   | -0.254    | 2e-05            | KCNK18                | Hypomethylated in FP vs FN |
| cg00090261 | 0.259   | 0.663   | -0.404    | 2e-05            | RGS22                 | Hypomethylated in FP vs FN |
| cg00836482 | 0.163   | 0.528   | -0.365    | 2e-05            | NA                    | Hypomethylated in FP vs FN |
| cg14217495 | 0.237   | 0.500   | -0.263    | 2e-05            | NA                    | Hypomethylated in FP vs FN |
| cg13903179 | 0.196   | 0.549   | -0.352    | 2e-05            | NA                    | Hypomethylated in FP vs FN |
| cg00044107 | 0.481   | 0.734   | -0.253    | 2e-05            | NA                    | Hypomethylated in FP vs FN |
| cg04543938 | 0.358   | 0.744   | -0.386    | 2e-05            | NA                    | Hypomethylated in FP vs FN |

### Supplementary Table 7 (continued)

| Probe      | FP.mean | FN.mean | Mean.diff | Adjusted.P.value | Promoter.related.gene | Category                   |
|------------|---------|---------|-----------|------------------|-----------------------|----------------------------|
| cg19022697 | 0.210   | 0.590   | -0.380    | 2e-05            | NA                    | Hypomethylated in FP vs FN |
| cg13845692 | 0.465   | 0.750   | -0.285    | 2e-05            | NA                    | Hypomethylated in FP vs FN |
| cg01907426 | 0.471   | 0.756   | -0.285    | 2e-05            | NA                    | Hypomethylated in FP vs FN |
| cg16659728 | 0.482   | 0.734   | -0.253    | 2e-05            | MRGPRD                | Hypomethylated in FP vs FN |
| cg05388963 | 0.464   | 0.755   | -0.291    | 2e-05            | NA                    | Hypomethylated in FP vs FN |
| cg06002638 | 0.463   | 0.748   | -0.285    | 2e-05            | NA                    | Hypomethylated in FP vs FN |
| cg13689204 | 0.582   | 0.837   | -0.256    | 2e-05            | NA                    | Hypomethylated in FP vs FN |
| cg16900980 | 0.049   | 0.317   | -0.268    | 2e-05            | NA                    | Hypomethylated in FP vs FN |
| cg25858249 | 0.263   | 0.548   | -0.285    | 2e-05            | PLEKHG1               | Hypomethylated in FP vs FN |
| cg12755298 | 0.083   | 0.342   | -0.259    | 2e-05            | CYP7B1                | Hypomethylated in FP vs FN |
| cg03058660 | 0.154   | 0.506   | -0.351    | 2e-05            | NA                    | Hypomethylated in FP vs FN |
| cg18798099 | 0.443   | 0.757   | -0.314    | 2e-05            | NA                    | Hypomethylated in FP vs FN |
| cg01778589 | 0.422   | 0.719   | -0.297    | 2e-05            | NA                    | Hypomethylated in FP vs FN |
| cg23034373 | 0.481   | 0.738   | -0.258    | 2e-05            | CLDN14                | Hypomethylated in FP vs FN |
| cg14700325 | 0.449   | 0.699   | -0.250    | 2e-05            | NA                    | Hypomethylated in FP vs FN |
| cg00023726 | 0.564   | 0.845   | -0.281    | 2e-05            | NA                    | Hypomethylated in FP vs FN |
| cg25994871 | 0.433   | 0.708   | -0.275    | 2e-05            | NA                    | Hypomethylated in FP vs FN |
| cg02849507 | 0.341   | 0.645   | -0.305    | 2e-05            | NA                    | Hypomethylated in FP vs FN |
| cg11216917 | 0.141   | 0.506   | -0.365    | 2e-05            | NA                    | Hypomethylated in FP vs FN |
| cg03125400 | 0.353   | 0.629   | -0.276    | 2e-05            | NA                    | Hypomethylated in FP vs FN |
| cg05412788 | 0.435   | 0.789   | -0.354    | 2e-05            | NA                    | Hypomethylated in FP vs FN |
| cg05936516 | 0.367   | 0.653   | -0.286    | 2e-05            | NA                    | Hypomethylated in FP vs FN |
| cg15715477 | 0.438   | 0.718   | -0.280    | 2e-05            | NA                    | Hypomethylated in FP vs FN |
| cg11879188 | 0.418   | 0.687   | -0.269    | 2e-05            | NA                    | Hypomethylated in FP vs FN |
| cg14744022 | 0.421   | 0.687   | -0.267    | 2e-05            | NA                    | Hypomethylated in FP vs FN |

### Supplementary Table 7 (continued)

| Probe      | FP.mean | FN.mean | Mean.diff | Adjusted.P.value | Promoter.related.gene | Category                   |
|------------|---------|---------|-----------|------------------|-----------------------|----------------------------|
| cg26475031 | 0.475   | 0.728   | -0.253    | 2e-05            | NA                    | Hypomethylated in FP vs FN |
| cg00674004 | 0.458   | 0.751   | -0.293    | 2e-05            | NA                    | Hypomethylated in FP vs FN |
| cg10089919 | 0.454   | 0.759   | -0.304    | 2e-05            | NA                    | Hypomethylated in FP vs FN |
| cg13523818 | 0.404   | 0.672   | -0.268    | 2e-05            | NA                    | Hypomethylated in FP vs FN |
| cg06844661 | 0.411   | 0.692   | -0.281    | 2e-05            | NA                    | Hypomethylated in FP vs FN |
| cg16911810 | 0.333   | 0.667   | -0.334    | 2e-05            | NA                    | Hypomethylated in FP vs FN |
| cg24555670 | 0.478   | 0.805   | -0.327    | 2e-05            | NA                    | Hypomethylated in FP vs FN |
| cg25799994 | 0.142   | 0.552   | -0.411    | 2e-05            | GALNT3                | Hypomethylated in FP vs FN |
| cg00319595 | 0.577   | 0.864   | -0.287    | 2e-05            | BCAR1                 | Hypomethylated in FP vs FN |
| cg26576454 | 0.494   | 0.754   | -0.260    | 2e-05            | NA                    | Hypomethylated in FP vs FN |
| cg09932747 | 0.315   | 0.686   | -0.371    | 2e-05            | NA                    | Hypomethylated in FP vs FN |
| cg10781632 | 0.463   | 0.737   | -0.274    | 2e-05            | NA                    | Hypomethylated in FP vs FN |
| cg20211463 | 0.235   | 0.576   | -0.341    | 2e-05            | NA                    | Hypomethylated in FP vs FN |
| cg23589587 | 0.330   | 0.615   | -0.286    | 2e-05            | NA                    | Hypomethylated in FP vs FN |
| cg07177174 | 0.384   | 0.735   | -0.351    | 2e-05            | LPA                   | Hypomethylated in FP vs FN |
| cg00872151 | 0.408   | 0.732   | -0.324    | 2e-05            | NA                    | Hypomethylated in FP vs FN |
| cg17465304 | 0.408   | 0.717   | -0.309    | 2e-05            | KIF12                 | Hypomethylated in FP vs FN |
| cg20744756 | 0.410   | 0.693   | -0.283    | 2e-05            | NA                    | Hypomethylated in FP vs FN |
| cg02637318 | 0.148   | 0.582   | -0.434    | 2e-05            | ADAM32                | Hypomethylated in FP vs FN |
| cg15681626 | 0.149   | 0.523   | -0.374    | 2e-05            | NA                    | Hypomethylated in FP vs FN |
| cg24762931 | 0.436   | 0.708   | -0.272    | 2e-05            | NA                    | Hypomethylated in FP vs FN |
| cg23631930 | 0.474   | 0.741   | -0.267    | 2e-05            | CMTM5                 | Hypomethylated in FP vs FN |
| cg07925549 | 0.403   | 0.700   | -0.297    | 2e-05            | KRT75                 | Hypomethylated in FP vs FN |
| cg14839134 | 0.384   | 0.708   | -0.323    | 2e-05            | NA                    | Hypomethylated in FP vs FN |
| cg04217380 | 0.486   | 0.760   | -0.274    | 2e-05            | NA                    | Hypomethylated in FP vs FN |

### Supplementary Table 7 (continued)

| Probe      | FP.mean | FN.mean | Mean.diff | Adjusted.P.value | Promoter.related.gene | Category                   |
|------------|---------|---------|-----------|------------------|-----------------------|----------------------------|
| cg03168947 | 0.326   | 0.580   | -0.254    | 2e-05            | TRAK1                 | Hypomethylated in FP vs FN |
| cg25320115 | 0.135   | 0.563   | -0.428    | 2e-05            | KLHDC9                | Hypomethylated in FP vs FN |
| cg11291798 | 0.524   | 0.812   | -0.287    | 2e-05            | NA                    | Hypomethylated in FP vs FN |
| cg07725033 | 0.379   | 0.677   | -0.298    | 2e-05            | LOC285629             | Hypomethylated in FP vs FN |
| cg20023647 | 0.443   | 0.698   | -0.255    | 2e-05            | NA                    | Hypomethylated in FP vs FN |
| cg08378830 | 0.227   | 0.629   | -0.401    | 2e-05            | NA                    | Hypomethylated in FP vs FN |
| cg00720747 | 0.406   | 0.751   | -0.346    | 2e-05            | NA                    | Hypomethylated in FP vs FN |
| cg08740698 | 0.190   | 0.612   | -0.422    | 2e-05            | LTBR                  | Hypomethylated in FP vs FN |
| cg14016200 | 0.406   | 0.709   | -0.302    | 2e-05            | ICAM5                 | Hypomethylated in FP vs FN |
| cg16474118 | 0.338   | 0.648   | -0.311    | 2e-05            | NA                    | Hypomethylated in FP vs FN |
| cg22301418 | 0.282   | 0.680   | -0.397    | 2e-05            | NA                    | Hypomethylated in FP vs FN |
| cg16818372 | 0.497   | 0.775   | -0.278    | 2e-05            | NA                    | Hypomethylated in FP vs FN |
| cg13641903 | 0.411   | 0.690   | -0.278    | 2e-05            | NA                    | Hypomethylated in FP vs FN |
| cg24521811 | 0.501   | 0.753   | -0.251    | 2e-05            | NA                    | Hypomethylated in FP vs FN |
| cg18077580 | 0.361   | 0.681   | -0.319    | 2e-05            | NA                    | Hypomethylated in FP vs FN |
| cg19752855 | 0.466   | 0.758   | -0.291    | 2e-05            | NA                    | Hypomethylated in FP vs FN |
| cg00806214 | 0.403   | 0.703   | -0.300    | 2e-05            | NA                    | Hypomethylated in FP vs FN |
| cg25471923 | 0.326   | 0.587   | -0.261    | 2e-05            | NA                    | Hypomethylated in FP vs FN |
| cg03651493 | 0.176   | 0.496   | -0.320    | 2e-05            | NA                    | Hypomethylated in FP vs FN |
| cg26190835 | 0.401   | 0.692   | -0.291    | 2e-05            | NA                    | Hypomethylated in FP vs FN |
| cg03523254 | 0.408   | 0.717   | -0.309    | 2e-05            | NA                    | Hypomethylated in FP vs FN |
| cg03148084 | 0.493   | 0.799   | -0.306    | 2e-05            | CNDP1                 | Hypomethylated in FP vs FN |
| cg21970261 | 0.337   | 0.633   | -0.296    | 2e-05            | TFF3                  | Hypomethylated in FP vs FN |
| cg14348741 | 0.171   | 0.527   | -0.356    | 2e-05            | NA                    | Hypomethylated in FP vs FN |
| cg09451960 | 0.320   | 0.726   | -0.406    | 2e-05            | NA                    | Hypomethylated in FP vs FN |

### Supplementary Table 7 (continued)

| Probe      | FP.mean | FN.mean | Mean.diff | Adjusted.P.value | Promoter.related.gene | Category                   |
|------------|---------|---------|-----------|------------------|-----------------------|----------------------------|
| cg02343503 | 0.132   | 0.423   | -0.292    | 2e-05            | NA                    | Hypomethylated in FP vs FN |
| cg11160408 | 0.569   | 0.820   | -0.252    | 2e-05            | NA                    | Hypomethylated in FP vs FN |
| cg19431272 | 0.243   | 0.548   | -0.305    | 2e-05            | NA                    | Hypomethylated in FP vs FN |
| cg20579012 | 0.439   | 0.738   | -0.299    | 2e-05            | NA                    | Hypomethylated in FP vs FN |
| cg24704177 | 0.313   | 0.683   | -0.370    | 2e-05            | HOXD3                 | Hypomethylated in FP vs FN |
| cg17161419 | 0.149   | 0.412   | -0.263    | 2e-05            | NA                    | Hypomethylated in FP vs FN |
| cg05002837 | 0.547   | 0.799   | -0.251    | 2e-05            | NA                    | Hypomethylated in FP vs FN |
| cg09430664 | 0.401   | 0.673   | -0.272    | 2e-05            | NA                    | Hypomethylated in FP vs FN |
| cg00294940 | 0.372   | 0.677   | -0.305    | 2e-05            | SLC5A9                | Hypomethylated in FP vs FN |
| cg15645463 | 0.400   | 0.673   | -0.273    | 2e-05            | SIGIRR                | Hypomethylated in FP vs FN |
| cg17636752 | 0.255   | 0.603   | -0.348    | 2e-05            | NA                    | Hypomethylated in FP vs FN |
| cg23651323 | 0.098   | 0.443   | -0.344    | 2e-05            | KLHDC9                | Hypomethylated in FP vs FN |
| cg05539265 | 0.365   | 0.708   | -0.343    | 2e-05            | NA                    | Hypomethylated in FP vs FN |
| cg03236184 | 0.292   | 0.606   | -0.314    | 2e-05            | PTEN_KILLIN           | Hypomethylated in FP vs FN |
| cg24276681 | 0.117   | 0.510   | -0.392    | 2e-05            | NA                    | Hypomethylated in FP vs FN |
| cg04428163 | 0.426   | 0.729   | -0.303    | 2e-05            | SDCBP2                | Hypomethylated in FP vs FN |
| cg06357371 | 0.513   | 0.767   | -0.254    | 2e-05            | NA                    | Hypomethylated in FP vs FN |
| cg22985033 | 0.492   | 0.776   | -0.284    | 2e-05            | LBP                   | Hypomethylated in FP vs FN |
| cg21460686 | 0.490   | 0.812   | -0.323    | 2e-05            | NA                    | Hypomethylated in FP vs FN |
| cg05307477 | 0.401   | 0.684   | -0.284    | 2e-05            | KCNK18                | Hypomethylated in FP vs FN |
| cg05045343 | 0.124   | 0.535   | -0.410    | 2e-05            | NA                    | Hypomethylated in FP vs FN |
| cg09782097 | 0.315   | 0.653   | -0.338    | 2e-05            | PCDHB5                | Hypomethylated in FP vs FN |
| cg10999749 | 0.513   | 0.775   | -0.262    | 2e-05            | NA                    | Hypomethylated in FP vs FN |
| cg22831029 | 0.330   | 0.667   | -0.337    | 2e-05            | NA                    | Hypomethylated in FP vs FN |
| cg09508476 | 0.391   | 0.675   | -0.284    | 2e-05            | NA                    | Hypomethylated in FP vs FN |

### Supplementary Table 7 (continued)

| Probe      | FP.mean | FN.mean | Mean.diff | Adjusted.P.value | Promoter.related.gene | Category                   |
|------------|---------|---------|-----------|------------------|-----------------------|----------------------------|
| cg25831752 | 0.448   | 0.726   | -0.278    | 2e-05            | NA                    | Hypomethylated in FP vs FN |
| cg13558105 | 0.433   | 0.715   | -0.282    | 2e-05            | NA                    | Hypomethylated in FP vs FN |
| cg13078381 | 0.262   | 0.563   | -0.301    | 2e-05            | NA                    | Hypomethylated in FP vs FN |
| cg05421528 | 0.091   | 0.369   | -0.278    | 2e-05            | NA                    | Hypomethylated in FP vs FN |
| cg26814075 | 0.355   | 0.726   | -0.371    | 2e-05            | LEP                   | Hypomethylated in FP vs FN |
| cg06792065 | 0.186   | 0.588   | -0.402    | 2e-05            | NA                    | Hypomethylated in FP vs FN |
| cg14525610 | 0.552   | 0.808   | -0.256    | 2e-05            | NA                    | Hypomethylated in FP vs FN |
| cg27247807 | 0.357   | 0.626   | -0.269    | 2e-05            | NA                    | Hypomethylated in FP vs FN |
| cg19734830 | 0.335   | 0.627   | -0.291    | 2e-05            | NA                    | Hypomethylated in FP vs FN |
| cg03334052 | 0.368   | 0.621   | -0.253    | 2e-05            | NA                    | Hypomethylated in FP vs FN |
| cg26212163 | 0.134   | 0.404   | -0.270    | 2e-05            | LOC134466             | Hypomethylated in FP vs FN |
| cg08893692 | 0.182   | 0.628   | -0.446    | 2e-05            | NA                    | Hypomethylated in FP vs FN |
| cg06573604 | 0.266   | 0.702   | -0.436    | 2e-05            | NA                    | Hypomethylated in FP vs FN |
| cg07186962 | 0.251   | 0.521   | -0.270    | 2e-05            | NA                    | Hypomethylated in FP vs FN |
| cg05000860 | 0.396   | 0.755   | -0.359    | 2e-05            | NA                    | Hypomethylated in FP vs FN |
| cg01908462 | 0.225   | 0.558   | -0.333    | 2e-05            | NA                    | Hypomethylated in FP vs FN |
| cg00780456 | 0.336   | 0.596   | -0.260    | 2e-05            | NA                    | Hypomethylated in FP vs FN |
| cg14646613 | 0.394   | 0.657   | -0.263    | 2e-05            | NA                    | Hypomethylated in FP vs FN |
| cg18308285 | 0.132   | 0.388   | -0.256    | 2e-05            | ALOX15B               | Hypomethylated in FP vs FN |
| cg07601804 | 0.206   | 0.483   | -0.278    | 2e-05            | NA                    | Hypomethylated in FP vs FN |
| cg10100556 | 0.351   | 0.705   | -0.354    | 2e-05            | NA                    | Hypomethylated in FP vs FN |
| cg08961621 | 0.403   | 0.721   | -0.319    | 2e-05            | KCNJ15                | Hypomethylated in FP vs FN |
| cg24279418 | 0.090   | 0.341   | -0.251    | 2e-05            | NA                    | Hypomethylated in FP vs FN |
| cg07368061 | 0.359   | 0.612   | -0.253    | 2e-05            | NA                    | Hypomethylated in FP vs FN |
| cg14349078 | 0.543   | 0.808   | -0.265    | 2e-05            | NA                    | Hypomethylated in FP vs FN |

### Supplementary Table 7 (continued)

| Probe      | FP.mean | FN.mean | Mean.diff | Adjusted.P.value | Promoter.related.gene | Category                   |
|------------|---------|---------|-----------|------------------|-----------------------|----------------------------|
| cg26785157 | 0.386   | 0.722   | -0.336    | 2e-05            | NA                    | Hypomethylated in FP vs FN |
| cg09562285 | 0.586   | 0.842   | -0.256    | 2e-05            | NA                    | Hypomethylated in FP vs FN |
| cg26061177 | 0.155   | 0.457   | -0.302    | 2e-05            | NA                    | Hypomethylated in FP vs FN |
| cg04616691 | 0.103   | 0.496   | -0.393    | 2e-05            | PTEN_KILLIN           | Hypomethylated in FP vs FN |
| cg04705318 | 0.346   | 0.617   | -0.271    | 2e-05            | NA                    | Hypomethylated in FP vs FN |
| cg14790876 | 0.383   | 0.687   | -0.305    | 2e-05            | NA                    | Hypomethylated in FP vs FN |
| cg24816455 | 0.494   | 0.760   | -0.265    | 2e-05            | NA                    | Hypomethylated in FP vs FN |
| cg24721964 | 0.229   | 0.557   | -0.328    | 2e-05            | CLRN1                 | Hypomethylated in FP vs FN |
| cg01381617 | 0.301   | 0.638   | -0.337    | 2e-05            | NA                    | Hypomethylated in FP vs FN |
| cg22635363 | 0.309   | 0.600   | -0.291    | 2e-05            | NA                    | Hypomethylated in FP vs FN |
| cg26767387 | 0.442   | 0.703   | -0.261    | 2e-05            | NA                    | Hypomethylated in FP vs FN |
| cg18323768 | 0.195   | 0.610   | -0.415    | 2e-05            | NA                    | Hypomethylated in FP vs FN |
| cg06890747 | 0.291   | 0.650   | -0.359    | 2e-05            | NA                    | Hypomethylated in FP vs FN |
| cg02307288 | 0.454   | 0.736   | -0.282    | 2e-05            | NA                    | Hypomethylated in FP vs FN |
| cg01336781 | 0.105   | 0.467   | -0.362    | 2e-05            | NA                    | Hypomethylated in FP vs FN |
| cg07837852 | 0.384   | 0.740   | -0.356    | 2e-05            | NA                    | Hypomethylated in FP vs FN |
| cg15961105 | 0.504   | 0.773   | -0.269    | 2e-05            | NA                    | Hypomethylated in FP vs FN |
| cg13933373 | 0.538   | 0.811   | -0.272    | 2e-05            | NA                    | Hypomethylated in FP vs FN |
| cg16446738 | 0.509   | 0.759   | -0.250    | 2e-05            | NA                    | Hypomethylated in FP vs FN |
| cg01964170 | 0.339   | 0.610   | -0.271    | 2e-05            | NA                    | Hypomethylated in FP vs FN |
| cg04044664 | 0.253   | 0.575   | -0.322    | 2e-05            | ANKRD43               | Hypomethylated in FP vs FN |
| cg11595575 | 0.345   | 0.679   | -0.333    | 2e-05            | PCDHA10               | Hypomethylated in FP vs FN |
| cg02212339 | 0.308   | 0.620   | -0.312    | 2e-05            | NA                    | Hypomethylated in FP vs FN |
| cg11435943 | 0.338   | 0.683   | -0.345    | 2e-05            | SERPINB12             | Hypomethylated in FP vs FN |
| cg11685510 | 0.296   | 0.647   | -0.351    | 2e-05            | NA                    | Hypomethylated in FP vs FN |

### Supplementary Table 7 (continued)

| Probe      | FP.mean | FN.mean | Mean.diff | Adjusted.P.value | Promoter.related.gene | Category                   |
|------------|---------|---------|-----------|------------------|-----------------------|----------------------------|
| cg12593515 | 0.358   | 0.702   | -0.344    | 2e-05            | NA                    | Hypomethylated in FP vs FN |
| cg25896734 | 0.310   | 0.652   | -0.342    | 2e-05            | NA                    | Hypomethylated in FP vs FN |
| cg20149359 | 0.423   | 0.720   | -0.297    | 2e-05            | NA                    | Hypomethylated in FP vs FN |
| cg18702197 | 0.256   | 0.609   | -0.353    | 2e-05            | HOXD3                 | Hypomethylated in FP vs FN |
| cg10377903 | 0.108   | 0.508   | -0.399    | 2e-05            | NA                    | Hypomethylated in FP vs FN |
| cg26196496 | 0.411   | 0.705   | -0.294    | 2e-05            | CRHBP                 | Hypomethylated in FP vs FN |
| cg06765217 | 0.222   | 0.656   | -0.434    | 2e-05            | NA                    | Hypomethylated in FP vs FN |
| cg01405985 | 0.271   | 0.546   | -0.275    | 2e-05            | NA                    | Hypomethylated in FP vs FN |
| cg20114732 | 0.134   | 0.444   | -0.310    | 2e-05            | NA                    | Hypomethylated in FP vs FN |
| cg00146864 | 0.344   | 0.630   | -0.286    | 2e-05            | NA                    | Hypomethylated in FP vs FN |
| cg12879425 | 0.250   | 0.545   | -0.295    | 2e-05            | STAP1                 | Hypomethylated in FP vs FN |
| cg23239574 | 0.263   | 0.573   | -0.311    | 2e-05            | NA                    | Hypomethylated in FP vs FN |
| cg13504434 | 0.223   | 0.536   | -0.313    | 2e-05            | CABP1                 | Hypomethylated in FP vs FN |
| cg02845569 | 0.449   | 0.716   | -0.267    | 2e-05            | NA                    | Hypomethylated in FP vs FN |
| cg01556514 | 0.506   | 0.758   | -0.252    | 2e-05            | NA                    | Hypomethylated in FP vs FN |
| cg04450501 | 0.520   | 0.807   | -0.287    | 2e-05            | NA                    | Hypomethylated in FP vs FN |
| cg27606671 | 0.558   | 0.817   | -0.259    | 2e-05            | NA                    | Hypomethylated in FP vs FN |
| cg19630520 | 0.439   | 0.734   | -0.295    | 2e-05            | PSMB11                | Hypomethylated in FP vs FN |
| cg23877608 | 0.260   | 0.579   | -0.320    | 2e-05            | CCDC114               | Hypomethylated in FP vs FN |
| cg21146184 | 0.127   | 0.500   | -0.373    | 2e-05            | NA                    | Hypomethylated in FP vs FN |
| cg12468850 | 0.454   | 0.792   | -0.338    | 2e-05            | NA                    | Hypomethylated in FP vs FN |
| cg21038740 | 0.228   | 0.564   | -0.336    | 2e-05            | NA                    | Hypomethylated in FP vs FN |
| cg07224726 | 0.224   | 0.499   | -0.275    | 2e-05            | LVRN                  | Hypomethylated in FP vs FN |
| cg16303918 | 0.193   | 0.567   | -0.374    | 2e-05            | NA                    | Hypomethylated in FP vs FN |
| cg14958663 | 0.124   | 0.389   | -0.266    | 2e-05            | NA                    | Hypomethylated in FP vs FN |



**Supplementary Table 7 (continued)**

| Probe      | FP.mean | FN.mean | Mean.diff | Adjusted.P.value | Promoter.related.gene | Category                   |
|------------|---------|---------|-----------|------------------|-----------------------|----------------------------|
| cg06738239 | 0.429   | 0.680   | -0.252    | 2e-05            | NA                    | Hypomethylated in FP vs FN |
| cg17533563 | 0.322   | 0.634   | -0.313    | 2e-05            | NA                    | Hypomethylated in FP vs FN |
| cg16153168 | 0.530   | 0.787   | -0.257    | 2e-05            | NA                    | Hypomethylated in FP vs FN |
| cg23965061 | 0.147   | 0.470   | -0.323    | 2e-05            | TNFRSF10C             | Hypomethylated in FP vs FN |
| cg23343273 | 0.446   | 0.738   | -0.292    | 2e-05            | NA                    | Hypomethylated in FP vs FN |
| cg17515966 | 0.175   | 0.602   | -0.428    | 2e-05            | RNF207                | Hypomethylated in FP vs FN |
| cg02688752 | 0.194   | 0.519   | -0.325    | 2e-05            | NA                    | Hypomethylated in FP vs FN |
| cg15672437 | 0.222   | 0.643   | -0.421    | 2e-05            | NA                    | Hypomethylated in FP vs FN |
| cg16109381 | 0.355   | 0.690   | -0.335    | 2e-05            | NA                    | Hypomethylated in FP vs FN |
| cg16222491 | 0.420   | 0.747   | -0.327    | 2e-05            | NA                    | Hypomethylated in FP vs FN |
| cg27589809 | 0.324   | 0.588   | -0.264    | 2e-05            | CISH                  | Hypomethylated in FP vs FN |
| cg20242781 | 0.458   | 0.725   | -0.267    | 2e-05            | NA                    | Hypomethylated in FP vs FN |
| cg10390058 | 0.128   | 0.473   | -0.344    | 2e-05            | GALR1                 | Hypomethylated in FP vs FN |
| cg04085896 | 0.352   | 0.610   | -0.258    | 2e-05            | NA                    | Hypomethylated in FP vs FN |
| cg00050402 | 0.491   | 0.756   | -0.265    | 3e-05            | NA                    | Hypomethylated in FP vs FN |
| cg25629768 | 0.328   | 0.639   | -0.312    | 3e-05            | TIMM13                | Hypomethylated in FP vs FN |
| cg13000080 | 0.384   | 0.650   | -0.266    | 3e-05            | NA                    | Hypomethylated in FP vs FN |
| cg22273360 | 0.123   | 0.436   | -0.313    | 3e-05            | NA                    | Hypomethylated in FP vs FN |
| cg12206199 | 0.115   | 0.490   | -0.375    | 3e-05            | LOC375196             | Hypomethylated in FP vs FN |
| cg24233426 | 0.183   | 0.589   | -0.406    | 3e-05            | NA                    | Hypomethylated in FP vs FN |
| cg04207218 | 0.188   | 0.458   | -0.271    | 3e-05            | NA                    | Hypomethylated in FP vs FN |
| cg14250336 | 0.472   | 0.758   | -0.286    | 3e-05            | NA                    | Hypomethylated in FP vs FN |
| cg04111078 | 0.521   | 0.853   | -0.332    | 3e-05            | NA                    | Hypomethylated in FP vs FN |
| cg23181573 | 0.328   | 0.584   | -0.256    | 3e-05            | NA                    | Hypomethylated in FP vs FN |
| cg13114088 | 0.458   | 0.757   | -0.299    | 3e-05            | ERMN                  | Hypomethylated in FP vs FN |

### Supplementary Table 7 (continued)

| Probe      | FP.mean | FN.mean | Mean.diff | Adjusted.P.value | Promoter.related.gene | Category                   |
|------------|---------|---------|-----------|------------------|-----------------------|----------------------------|
| cg04268254 | 0.252   | 0.631   | -0.379    | 3e-05            | NA                    | Hypomethylated in FP vs FN |
| cg26804423 | 0.395   | 0.679   | -0.284    | 3e-05            | NA                    | Hypomethylated in FP vs FN |
| cg27421679 | 0.269   | 0.538   | -0.270    | 3e-05            | NA                    | Hypomethylated in FP vs FN |
| cg21858680 | 0.419   | 0.671   | -0.252    | 3e-05            | NA                    | Hypomethylated in FP vs FN |
| cg26416159 | 0.426   | 0.724   | -0.298    | 3e-05            | NA                    | Hypomethylated in FP vs FN |
| cg16726039 | 0.308   | 0.694   | -0.386    | 3e-05            | NA                    | Hypomethylated in FP vs FN |
| cg17069473 | 0.492   | 0.792   | -0.300    | 3e-05            | NA                    | Hypomethylated in FP vs FN |
| cg17383236 | 0.345   | 0.617   | -0.272    | 3e-05            | NA                    | Hypomethylated in FP vs FN |
| cg24501758 | 0.415   | 0.693   | -0.279    | 3e-05            | NA                    | Hypomethylated in FP vs FN |
| cg16810605 | 0.263   | 0.645   | -0.382    | 3e-05            | NA                    | Hypomethylated in FP vs FN |
| cg05506011 | 0.292   | 0.542   | -0.250    | 3e-05            | C3orf30               | Hypomethylated in FP vs FN |
| cg08230177 | 0.273   | 0.658   | -0.386    | 3e-05            | NA                    | Hypomethylated in FP vs FN |
| cg09148270 | 0.377   | 0.647   | -0.271    | 3e-05            | BTG4_C11orf88         | Hypomethylated in FP vs FN |
| cg14398860 | 0.270   | 0.684   | -0.413    | 3e-05            | NA                    | Hypomethylated in FP vs FN |
| cg10790791 | 0.457   | 0.711   | -0.255    | 3e-05            | SFRP2                 | Hypomethylated in FP vs FN |
| cg16458058 | 0.507   | 0.781   | -0.274    | 3e-05            | NA                    | Hypomethylated in FP vs FN |
| cg18746774 | 0.438   | 0.707   | -0.269    | 3e-05            | APOBEC3A              | Hypomethylated in FP vs FN |
| cg12379940 | 0.073   | 0.457   | -0.384    | 3e-05            | SERP2                 | Hypomethylated in FP vs FN |
| cg11943820 | 0.501   | 0.761   | -0.260    | 3e-05            | ITPRIP                | Hypomethylated in FP vs FN |
| cg05716075 | 0.435   | 0.755   | -0.320    | 3e-05            | NA                    | Hypomethylated in FP vs FN |
| cg05672223 | 0.352   | 0.654   | -0.303    | 3e-05            | NA                    | Hypomethylated in FP vs FN |
| cg21769619 | 0.325   | 0.639   | -0.314    | 3e-05            | NA                    | Hypomethylated in FP vs FN |
| cg14546505 | 0.577   | 0.832   | -0.255    | 3e-05            | NA                    | Hypomethylated in FP vs FN |
| cg23895846 | 0.376   | 0.681   | -0.304    | 3e-05            | NA                    | Hypomethylated in FP vs FN |
| cg10775792 | 0.103   | 0.407   | -0.304    | 3e-05            | PCP4L1                | Hypomethylated in FP vs FN |

### Supplementary Table 7 (continued)

| Probe      | FP.mean | FN.mean | Mean.diff | Adjusted.P.value | Promoter.related.gene | Category                   |
|------------|---------|---------|-----------|------------------|-----------------------|----------------------------|
| cg23796130 | 0.452   | 0.716   | -0.265    | 3e-05            | NA                    | Hypomethylated in FP vs FN |
| cg06216293 | 0.263   | 0.516   | -0.254    | 3e-05            | NA                    | Hypomethylated in FP vs FN |
| cg12883629 | 0.288   | 0.640   | -0.351    | 3e-05            | NA                    | Hypomethylated in FP vs FN |
| cg00355389 | 0.180   | 0.462   | -0.282    | 3e-05            | CLSTN2                | Hypomethylated in FP vs FN |
| cg01175020 | 0.368   | 0.727   | -0.359    | 3e-05            | NA                    | Hypomethylated in FP vs FN |
| cg02574863 | 0.424   | 0.680   | -0.257    | 3e-05            | NA                    | Hypomethylated in FP vs FN |
| cg17440044 | 0.190   | 0.482   | -0.292    | 3e-05            | NA                    | Hypomethylated in FP vs FN |
| cg04561261 | 0.392   | 0.683   | -0.291    | 3e-05            | NA                    | Hypomethylated in FP vs FN |
| cg06312132 | 0.507   | 0.761   | -0.254    | 3e-05            | NA                    | Hypomethylated in FP vs FN |
| cg23064082 | 0.317   | 0.599   | -0.282    | 3e-05            | NA                    | Hypomethylated in FP vs FN |
| cg17955729 | 0.476   | 0.770   | -0.294    | 3e-05            | NA                    | Hypomethylated in FP vs FN |
| cg14500798 | 0.191   | 0.589   | -0.398    | 3e-05            | NA                    | Hypomethylated in FP vs FN |
| cg14050954 | 0.323   | 0.616   | -0.293    | 3e-05            | ACAP1                 | Hypomethylated in FP vs FN |
| cg16664584 | 0.297   | 0.580   | -0.282    | 3e-05            | NA                    | Hypomethylated in FP vs FN |
| cg09730801 | 0.285   | 0.628   | -0.343    | 3e-05            | DLX4                  | Hypomethylated in FP vs FN |
| cg26655344 | 0.478   | 0.739   | -0.260    | 3e-05            | NA                    | Hypomethylated in FP vs FN |
| cg13605674 | 0.486   | 0.752   | -0.266    | 3e-05            | TM4SF19               | Hypomethylated in FP vs FN |
| cg25119690 | 0.241   | 0.601   | -0.360    | 3e-05            | NA                    | Hypomethylated in FP vs FN |
| cg16750157 | 0.222   | 0.634   | -0.411    | 3e-05            | NA                    | Hypomethylated in FP vs FN |
| cg21297772 | 0.419   | 0.673   | -0.254    | 3e-05            | SLC5A9                | Hypomethylated in FP vs FN |
| cg06442489 | 0.267   | 0.524   | -0.257    | 3e-05            | ZSCAN18               | Hypomethylated in FP vs FN |
| cg06188496 | 0.419   | 0.675   | -0.256    | 3e-05            | NA                    | Hypomethylated in FP vs FN |
| cg05048259 | 0.416   | 0.742   | -0.326    | 3e-05            | NA                    | Hypomethylated in FP vs FN |
| cg00424276 | 0.386   | 0.656   | -0.270    | 3e-05            | EFCAB10               | Hypomethylated in FP vs FN |
| cg22561647 | 0.414   | 0.758   | -0.344    | 3e-05            | NA                    | Hypomethylated in FP vs FN |

### Supplementary Table 7 (continued)

| Probe      | FP.mean | FN.mean | Mean.diff | Adjusted.P.value | Promoter.related.gene | Category                   |
|------------|---------|---------|-----------|------------------|-----------------------|----------------------------|
| cg04669895 | 0.486   | 0.779   | -0.293    | 3e-05            | NA                    | Hypomethylated in FP vs FN |
| cg01712159 | 0.536   | 0.829   | -0.293    | 3e-05            | NA                    | Hypomethylated in FP vs FN |
| cg18880897 | 0.369   | 0.643   | -0.274    | 3e-05            | ERAP2                 | Hypomethylated in FP vs FN |
| cg19252741 | 0.320   | 0.608   | -0.288    | 3e-05            | NA                    | Hypomethylated in FP vs FN |
| cg26298967 | 0.237   | 0.525   | -0.288    | 3e-05            | NA                    | Hypomethylated in FP vs FN |
| cg03730027 | 0.451   | 0.714   | -0.263    | 3e-05            | NA                    | Hypomethylated in FP vs FN |
| cg24339704 | 0.522   | 0.793   | -0.271    | 3e-05            | NA                    | Hypomethylated in FP vs FN |
| cg19887700 | 0.139   | 0.496   | -0.357    | 3e-05            | NA                    | Hypomethylated in FP vs FN |
| cg06103642 | 0.146   | 0.523   | -0.378    | 3e-05            | NA                    | Hypomethylated in FP vs FN |
| cg16277071 | 0.333   | 0.609   | -0.276    | 3e-05            | NA                    | Hypomethylated in FP vs FN |
| cg19650253 | 0.426   | 0.705   | -0.279    | 3e-05            | NA                    | Hypomethylated in FP vs FN |
| cg27401891 | 0.529   | 0.786   | -0.258    | 3e-05            | NA                    | Hypomethylated in FP vs FN |
| cg21859562 | 0.536   | 0.808   | -0.272    | 3e-05            | NA                    | Hypomethylated in FP vs FN |
| cg13060157 | 0.150   | 0.519   | -0.369    | 3e-05            | NA                    | Hypomethylated in FP vs FN |
| cg02387326 | 0.185   | 0.602   | -0.417    | 3e-05            | NA                    | Hypomethylated in FP vs FN |
| cg01037895 | 0.366   | 0.687   | -0.322    | 3e-05            | ALPL                  | Hypomethylated in FP vs FN |
| cg01128482 | 0.386   | 0.734   | -0.348    | 3e-05            | HOXD3                 | Hypomethylated in FP vs FN |
| cg15213650 | 0.347   | 0.600   | -0.252    | 3e-05            | NA                    | Hypomethylated in FP vs FN |
| cg25848076 | 0.230   | 0.596   | -0.365    | 3e-05            | NA                    | Hypomethylated in FP vs FN |
| cg04550439 | 0.428   | 0.720   | -0.292    | 3e-05            | NA                    | Hypomethylated in FP vs FN |
| cg17833169 | 0.186   | 0.523   | -0.337    | 3e-05            | NA                    | Hypomethylated in FP vs FN |
| cg21429745 | 0.097   | 0.433   | -0.336    | 3e-05            | NA                    | Hypomethylated in FP vs FN |
| cg14185656 | 0.497   | 0.756   | -0.259    | 3e-05            | NA                    | Hypomethylated in FP vs FN |
| cg03477792 | 0.180   | 0.530   | -0.350    | 3e-05            | ANKRD56               | Hypomethylated in FP vs FN |
| cg26441910 | 0.432   | 0.780   | -0.348    | 3e-05            | NA                    | Hypomethylated in FP vs FN |

### Supplementary Table 7 (continued)

| Probe      | FP.mean | FN.mean | Mean.diff | Adjusted.P.value | Promoter.related.gene | Category                   |
|------------|---------|---------|-----------|------------------|-----------------------|----------------------------|
| cg18475775 | 0.545   | 0.801   | -0.256    | 3e-05            | NA                    | Hypomethylated in FP vs FN |
| cg13571460 | 0.431   | 0.718   | -0.287    | 3e-05            | NA                    | Hypomethylated in FP vs FN |
| cg01719987 | 0.441   | 0.707   | -0.265    | 3e-05            | NCRNA00175            | Hypomethylated in FP vs FN |
| cg16257029 | 0.265   | 0.540   | -0.275    | 3e-05            | ADAM12                | Hypomethylated in FP vs FN |
| cg08284564 | 0.464   | 0.738   | -0.274    | 3e-05            | BCAR1                 | Hypomethylated in FP vs FN |
| cg07813254 | 0.334   | 0.639   | -0.305    | 3e-05            | FAM43B                | Hypomethylated in FP vs FN |
| cg05768427 | 0.164   | 0.603   | -0.439    | 3e-05            | NA                    | Hypomethylated in FP vs FN |
| cg12457909 | 0.111   | 0.418   | -0.308    | 3e-05            | NA                    | Hypomethylated in FP vs FN |
| cg25076459 | 0.175   | 0.498   | -0.323    | 3e-05            | NA                    | Hypomethylated in FP vs FN |
| cg14594966 | 0.438   | 0.736   | -0.298    | 3e-05            | NA                    | Hypomethylated in FP vs FN |
| cg09957942 | 0.351   | 0.631   | -0.280    | 3e-05            | NA                    | Hypomethylated in FP vs FN |
| cg04426802 | 0.454   | 0.823   | -0.369    | 3e-05            | NA                    | Hypomethylated in FP vs FN |
| cg27632318 | 0.512   | 0.777   | -0.265    | 3e-05            | NA                    | Hypomethylated in FP vs FN |
| cg13628577 | 0.178   | 0.523   | -0.345    | 3e-05            | NA                    | Hypomethylated in FP vs FN |
| cg26925025 | 0.408   | 0.670   | -0.261    | 3e-05            | CA1                   | Hypomethylated in FP vs FN |
| cg05138133 | 0.447   | 0.740   | -0.293    | 3e-05            | NA                    | Hypomethylated in FP vs FN |
| cg25637473 | 0.518   | 0.849   | -0.331    | 3e-05            | NA                    | Hypomethylated in FP vs FN |
| cg12942414 | 0.164   | 0.507   | -0.342    | 3e-05            | NA                    | Hypomethylated in FP vs FN |
| cg08960549 | 0.494   | 0.792   | -0.298    | 3e-05            | NA                    | Hypomethylated in FP vs FN |
| cg07478392 | 0.255   | 0.634   | -0.379    | 3e-05            | NA                    | Hypomethylated in FP vs FN |
| cg16479539 | 0.117   | 0.509   | -0.392    | 3e-05            | NA                    | Hypomethylated in FP vs FN |
| cg10961186 | 0.202   | 0.625   | -0.422    | 3e-05            | NA                    | Hypomethylated in FP vs FN |
| cg22699361 | 0.346   | 0.634   | -0.288    | 3e-05            | FLJ39609              | Hypomethylated in FP vs FN |
| cg01213645 | 0.342   | 0.683   | -0.340    | 3e-05            | NA                    | Hypomethylated in FP vs FN |
| cg04085076 | 0.223   | 0.547   | -0.323    | 3e-05            | HOPX                  | Hypomethylated in FP vs FN |

### Supplementary Table 7 (continued)

| Probe      | FP.mean | FN.mean | Mean.diff | Adjusted.P.value | Promoter.related.gene | Category                   |
|------------|---------|---------|-----------|------------------|-----------------------|----------------------------|
| cg00355678 | 0.462   | 0.809   | -0.347    | 3e-05            | NA                    | Hypomethylated in FP vs FN |
| cg08256939 | 0.212   | 0.478   | -0.266    | 3e-05            | NA                    | Hypomethylated in FP vs FN |
| cg10452531 | 0.197   | 0.596   | -0.399    | 3e-05            | LTBR                  | Hypomethylated in FP vs FN |
| cg11762968 | 0.364   | 0.656   | -0.292    | 3e-05            | NA                    | Hypomethylated in FP vs FN |
| cg08522676 | 0.289   | 0.640   | -0.351    | 3e-05            | NA                    | Hypomethylated in FP vs FN |
| cg19049152 | 0.222   | 0.556   | -0.334    | 3e-05            | THSD1P                | Hypomethylated in FP vs FN |
| cg27291258 | 0.513   | 0.766   | -0.252    | 3e-05            | NA                    | Hypomethylated in FP vs FN |
| cg05192402 | 0.226   | 0.509   | -0.283    | 3e-05            | NA                    | Hypomethylated in FP vs FN |
| cg26794883 | 0.396   | 0.650   | -0.254    | 3e-05            | NA                    | Hypomethylated in FP vs FN |
| cg04231590 | 0.528   | 0.796   | -0.268    | 3e-05            | NA                    | Hypomethylated in FP vs FN |
| cg13723983 | 0.336   | 0.626   | -0.290    | 3e-05            | C9orf50               | Hypomethylated in FP vs FN |
| cg14626525 | 0.463   | 0.752   | -0.288    | 3e-05            | MIR602                | Hypomethylated in FP vs FN |
| cg27260772 | 0.322   | 0.717   | -0.395    | 3e-05            | NA                    | Hypomethylated in FP vs FN |
| cg09287629 | 0.254   | 0.582   | -0.328    | 3e-05            | NA                    | Hypomethylated in FP vs FN |
| cg13708974 | 0.471   | 0.784   | -0.312    | 3e-05            | NA                    | Hypomethylated in FP vs FN |
| cg08518631 | 0.152   | 0.452   | -0.300    | 3e-05            | NA                    | Hypomethylated in FP vs FN |
| cg00664581 | 0.332   | 0.586   | -0.254    | 3e-05            | NA                    | Hypomethylated in FP vs FN |
| cg20067272 | 0.388   | 0.752   | -0.364    | 3e-05            | NA                    | Hypomethylated in FP vs FN |
| cg22396280 | 0.480   | 0.734   | -0.254    | 3e-05            | NA                    | Hypomethylated in FP vs FN |
| cg00268019 | 0.185   | 0.544   | -0.359    | 3e-05            | LY75                  | Hypomethylated in FP vs FN |
| cg14153919 | 0.549   | 0.809   | -0.259    | 3e-05            | CRABP1                | Hypomethylated in FP vs FN |
| cg02254898 | 0.436   | 0.715   | -0.278    | 3e-05            | NA                    | Hypomethylated in FP vs FN |
| cg24694501 | 0.261   | 0.597   | -0.337    | 3e-05            | NA                    | Hypomethylated in FP vs FN |
| cg00400832 | 0.197   | 0.578   | -0.380    | 3e-05            | NA                    | Hypomethylated in FP vs FN |
| cg09504322 | 0.314   | 0.635   | -0.321    | 3e-05            | NA                    | Hypomethylated in FP vs FN |

### Supplementary Table 7 (continued)

| Probe      | FP.mean | FN.mean | Mean.diff | Adjusted.P.value | Promoter.related.gene | Category                   |
|------------|---------|---------|-----------|------------------|-----------------------|----------------------------|
| cg03473518 | 0.243   | 0.584   | -0.341    | 3e-05            | GJB6                  | Hypomethylated in FP vs FN |
| cg20223206 | 0.459   | 0.718   | -0.259    | 3e-05            | NA                    | Hypomethylated in FP vs FN |
| cg23658684 | 0.352   | 0.664   | -0.312    | 3e-05            | NA                    | Hypomethylated in FP vs FN |
| cg02731366 | 0.409   | 0.680   | -0.270    | 3e-05            | ZBTB7C                | Hypomethylated in FP vs FN |
| cg13354414 | 0.312   | 0.630   | -0.318    | 3e-05            | MGC26647              | Hypomethylated in FP vs FN |
| cg19656633 | 0.340   | 0.623   | -0.282    | 3e-05            | NA                    | Hypomethylated in FP vs FN |
| cg04255276 | 0.335   | 0.639   | -0.304    | 3e-05            | NA                    | Hypomethylated in FP vs FN |
| cg24610044 | 0.521   | 0.806   | -0.285    | 3e-05            | NA                    | Hypomethylated in FP vs FN |
| cg19571015 | 0.329   | 0.667   | -0.338    | 3e-05            | NA                    | Hypomethylated in FP vs FN |
| cg12974637 | 0.156   | 0.537   | -0.382    | 3e-05            | CCDC68                | Hypomethylated in FP vs FN |
| cg16763443 | 0.330   | 0.675   | -0.345    | 3e-05            | NA                    | Hypomethylated in FP vs FN |
| cg16674492 | 0.185   | 0.576   | -0.391    | 3e-05            | NA                    | Hypomethylated in FP vs FN |
| cg19343566 | 0.192   | 0.492   | -0.299    | 3e-05            | NA                    | Hypomethylated in FP vs FN |
| cg17037611 | 0.351   | 0.634   | -0.282    | 3e-05            | NA                    | Hypomethylated in FP vs FN |
| cg15266705 | 0.080   | 0.447   | -0.367    | 3e-05            | NA                    | Hypomethylated in FP vs FN |
| cg07910075 | 0.498   | 0.753   | -0.255    | 3e-05            | NA                    | Hypomethylated in FP vs FN |
| cg24424381 | 0.084   | 0.463   | -0.380    | 3e-05            | WDR93_PEX11A          | Hypomethylated in FP vs FN |
| cg18192919 | 0.181   | 0.530   | -0.349    | 3e-05            | TMEM26                | Hypomethylated in FP vs FN |
| cg24995657 | 0.171   | 0.534   | -0.363    | 3e-05            | PLEK2                 | Hypomethylated in FP vs FN |
| cg08583570 | 0.391   | 0.669   | -0.278    | 3e-05            | NA                    | Hypomethylated in FP vs FN |
| cg18081687 | 0.560   | 0.833   | -0.272    | 3e-05            | NA                    | Hypomethylated in FP vs FN |
| cg03940064 | 0.123   | 0.496   | -0.373    | 3e-05            | SPATA18               | Hypomethylated in FP vs FN |
| cg17944891 | 0.336   | 0.604   | -0.268    | 3e-05            | MYH3                  | Hypomethylated in FP vs FN |
| cg23066057 | 0.475   | 0.804   | -0.330    | 3e-05            | NA                    | Hypomethylated in FP vs FN |
| cg26120787 | 0.327   | 0.663   | -0.336    | 3e-05            | NA                    | Hypomethylated in FP vs FN |

### Supplementary Table 7 (continued)

| Probe      | FP.mean | FN.mean | Mean.diff | Adjusted.P.value | Promoter.related.gene | Category                   |
|------------|---------|---------|-----------|------------------|-----------------------|----------------------------|
| cg05211768 | 0.186   | 0.542   | -0.357    | 3e-05            | FES                   | Hypomethylated in FP vs FN |
| cg14602471 | 0.097   | 0.394   | -0.297    | 3e-05            | NA                    | Hypomethylated in FP vs FN |
| cg05569109 | 0.133   | 0.562   | -0.429    | 3e-05            | GALNT3                | Hypomethylated in FP vs FN |
| cg20654082 | 0.468   | 0.724   | -0.256    | 3e-05            | NA                    | Hypomethylated in FP vs FN |
| cg08450554 | 0.321   | 0.607   | -0.286    | 3e-05            | NA                    | Hypomethylated in FP vs FN |
| cg13784276 | 0.432   | 0.775   | -0.343    | 3e-05            | NA                    | Hypomethylated in FP vs FN |
| cg08496737 | 0.345   | 0.603   | -0.258    | 3e-05            | NXF1                  | Hypomethylated in FP vs FN |
| cg27254040 | 0.392   | 0.726   | -0.334    | 3e-05            | NA                    | Hypomethylated in FP vs FN |
| cg04669815 | 0.128   | 0.518   | -0.391    | 3e-05            | NA                    | Hypomethylated in FP vs FN |
| cg02823066 | 0.254   | 0.515   | -0.260    | 3e-05            | NA                    | Hypomethylated in FP vs FN |
| cg09287864 | 0.384   | 0.671   | -0.286    | 3e-05            | NA                    | Hypomethylated in FP vs FN |
| cg08203794 | 0.433   | 0.710   | -0.277    | 3e-05            | NA                    | Hypomethylated in FP vs FN |
| cg09257824 | 0.220   | 0.625   | -0.405    | 3e-05            | NA                    | Hypomethylated in FP vs FN |
| cg27642416 | 0.269   | 0.592   | -0.323    | 3e-05            | NA                    | Hypomethylated in FP vs FN |
| cg08785274 | 0.200   | 0.578   | -0.379    | 3e-05            | KLHDC9                | Hypomethylated in FP vs FN |
| cg08116915 | 0.303   | 0.599   | -0.296    | 3e-05            | NA                    | Hypomethylated in FP vs FN |
| cg11617144 | 0.554   | 0.861   | -0.307    | 3e-05            | GPT                   | Hypomethylated in FP vs FN |
| cg01381109 | 0.102   | 0.378   | -0.276    | 3e-05            | NA                    | Hypomethylated in FP vs FN |
| cg10180297 | 0.227   | 0.536   | -0.309    | 3e-05            | NA                    | Hypomethylated in FP vs FN |
| cg00564163 | 0.413   | 0.725   | -0.312    | 3e-05            | NA                    | Hypomethylated in FP vs FN |
| cg03037039 | 0.264   | 0.554   | -0.290    | 3e-05            | NA                    | Hypomethylated in FP vs FN |
| cg18690282 | 0.470   | 0.741   | -0.270    | 3e-05            | NA                    | Hypomethylated in FP vs FN |
| cg26467269 | 0.349   | 0.614   | -0.265    | 3e-05            | NA                    | Hypomethylated in FP vs FN |
| cg10912515 | 0.470   | 0.748   | -0.277    | 3e-05            | NA                    | Hypomethylated in FP vs FN |
| cg16094412 | 0.133   | 0.595   | -0.461    | 3e-05            | RNF207                | Hypomethylated in FP vs FN |



**Supplementary Table 7 (continued)**

| Probe      | FP.mean | FN.mean | Mean.diff | Adjusted.P.value | Promoter.related.gene | Category                   |
|------------|---------|---------|-----------|------------------|-----------------------|----------------------------|
| cg08648568 | 0.111   | 0.454   | -0.343    | 3e-05            | NA                    | Hypomethylated in FP vs FN |
| cg09171093 | 0.551   | 0.804   | -0.253    | 3e-05            | NA                    | Hypomethylated in FP vs FN |
| cg27197651 | 0.356   | 0.716   | -0.360    | 3e-05            | NA                    | Hypomethylated in FP vs FN |
| cg26653360 | 0.076   | 0.473   | -0.396    | 3e-05            | WDR93_PEX11A          | Hypomethylated in FP vs FN |
| cg16643261 | 0.613   | 0.865   | -0.252    | 3e-05            | TCEB3B                | Hypomethylated in FP vs FN |
| cg18771659 | 0.510   | 0.793   | -0.284    | 3e-05            | SPRR1B                | Hypomethylated in FP vs FN |
| cg25938806 | 0.289   | 0.643   | -0.354    | 3e-05            | HOXD3                 | Hypomethylated in FP vs FN |
| cg10044470 | 0.362   | 0.637   | -0.275    | 3e-05            | NA                    | Hypomethylated in FP vs FN |
| cg12428416 | 0.536   | 0.793   | -0.256    | 3e-05            | NA                    | Hypomethylated in FP vs FN |
| cg24751129 | 0.477   | 0.746   | -0.269    | 3e-05            | NA                    | Hypomethylated in FP vs FN |
| cg23133255 | 0.439   | 0.692   | -0.253    | 3e-05            | NECAB1                | Hypomethylated in FP vs FN |
| cg18351683 | 0.244   | 0.522   | -0.278    | 3e-05            | NA                    | Hypomethylated in FP vs FN |
| cg01534391 | 0.532   | 0.791   | -0.259    | 3e-05            | NA                    | Hypomethylated in FP vs FN |
| cg15416363 | 0.485   | 0.740   | -0.255    | 3e-05            | SPEM1                 | Hypomethylated in FP vs FN |
| cg08286181 | 0.474   | 0.752   | -0.278    | 3e-05            | NA                    | Hypomethylated in FP vs FN |
| cg24384057 | 0.438   | 0.693   | -0.255    | 3e-05            | NA                    | Hypomethylated in FP vs FN |
| cg26995083 | 0.241   | 0.560   | -0.319    | 3e-05            | TJAP1                 | Hypomethylated in FP vs FN |
| cg25188238 | 0.493   | 0.768   | -0.275    | 3e-05            | NA                    | Hypomethylated in FP vs FN |
| cg25913520 | 0.096   | 0.429   | -0.333    | 3e-05            | NA                    | Hypomethylated in FP vs FN |
| cg20849025 | 0.297   | 0.582   | -0.285    | 3e-05            | MPEG1                 | Hypomethylated in FP vs FN |
| cg21460625 | 0.345   | 0.608   | -0.263    | 3e-05            | NA                    | Hypomethylated in FP vs FN |
| cg26808747 | 0.188   | 0.498   | -0.310    | 3e-05            | ADAM12                | Hypomethylated in FP vs FN |
| cg02524954 | 0.143   | 0.478   | -0.335    | 3e-05            | NA                    | Hypomethylated in FP vs FN |
| cg15833353 | 0.290   | 0.607   | -0.317    | 3e-05            | NA                    | Hypomethylated in FP vs FN |
| cg13585675 | 0.421   | 0.700   | -0.279    | 3e-05            | NA                    | Hypomethylated in FP vs FN |

### Supplementary Table 7 (continued)

| Probe      | FP.mean | FN.mean | Mean.diff | Adjusted.P.value | Promoter.related.gene | Category                   |
|------------|---------|---------|-----------|------------------|-----------------------|----------------------------|
| cg21449150 | 0.137   | 0.526   | -0.389    | 3e-05            | SPATA18               | Hypomethylated in FP vs FN |
| cg12913587 | 0.415   | 0.743   | -0.328    | 3e-05            | NA                    | Hypomethylated in FP vs FN |
| cg26833652 | 0.528   | 0.811   | -0.284    | 3e-05            | NA                    | Hypomethylated in FP vs FN |
| cg10789300 | 0.262   | 0.536   | -0.274    | 3e-05            | NA                    | Hypomethylated in FP vs FN |
| cg02699218 | 0.274   | 0.641   | -0.366    | 3e-05            | ANKRD43               | Hypomethylated in FP vs FN |
| cg16319578 | 0.294   | 0.705   | -0.411    | 3e-05            | HSPA2                 | Hypomethylated in FP vs FN |
| cg22208304 | 0.490   | 0.797   | -0.307    | 3e-05            | NA                    | Hypomethylated in FP vs FN |
| cg23864949 | 0.404   | 0.667   | -0.263    | 3e-05            | NA                    | Hypomethylated in FP vs FN |
| cg06226630 | 0.322   | 0.671   | -0.348    | 3e-05            | NA                    | Hypomethylated in FP vs FN |
| cg19193384 | 0.391   | 0.673   | -0.282    | 3e-05            | NA                    | Hypomethylated in FP vs FN |
| cg17285335 | 0.361   | 0.656   | -0.294    | 3e-05            | SLC5A12               | Hypomethylated in FP vs FN |
| cg16287679 | 0.356   | 0.648   | -0.292    | 3e-05            | NA                    | Hypomethylated in FP vs FN |
| cg11006453 | 0.177   | 0.454   | -0.277    | 3e-05            | NA                    | Hypomethylated in FP vs FN |
| cg06602847 | 0.103   | 0.481   | -0.378    | 3e-05            | DBC1                  | Hypomethylated in FP vs FN |
| cg24918798 | 0.435   | 0.690   | -0.255    | 3e-05            | NA                    | Hypomethylated in FP vs FN |
| cg00533202 | 0.331   | 0.620   | -0.289    | 3e-05            | NA                    | Hypomethylated in FP vs FN |
| cg09753193 | 0.508   | 0.768   | -0.261    | 3e-05            | NA                    | Hypomethylated in FP vs FN |
| cg15857470 | 0.359   | 0.656   | -0.298    | 3e-05            | NA                    | Hypomethylated in FP vs FN |
| cg08639279 | 0.476   | 0.787   | -0.311    | 3e-05            | NA                    | Hypomethylated in FP vs FN |
| cg04706655 | 0.194   | 0.558   | -0.363    | 3e-05            | NA                    | Hypomethylated in FP vs FN |
| cg08812108 | 0.455   | 0.744   | -0.289    | 3e-05            | NA                    | Hypomethylated in FP vs FN |
| cg27474149 | 0.353   | 0.660   | -0.307    | 3e-05            | NA                    | Hypomethylated in FP vs FN |
| cg04006323 | 0.114   | 0.392   | -0.278    | 3e-05            | NA                    | Hypomethylated in FP vs FN |
| cg24932585 | 0.374   | 0.631   | -0.258    | 3e-05            | NA                    | Hypomethylated in FP vs FN |
| cg20003638 | 0.566   | 0.831   | -0.265    | 3e-05            | NA                    | Hypomethylated in FP vs FN |

**Supplementary Table 7 (continued)**

| Probe      | FP.mean | FN.mean | Mean.diff | Adjusted.P.value | Promoter.related.gene | Category                   |
|------------|---------|---------|-----------|------------------|-----------------------|----------------------------|
| cg15205441 | 0.282   | 0.631   | -0.349    | 3e-05            | NA                    | Hypomethylated in FP vs FN |
| cg08626831 | 0.549   | 0.804   | -0.255    | 3e-05            | NA                    | Hypomethylated in FP vs FN |
| cg08578703 | 0.453   | 0.753   | -0.300    | 3e-05            | NA                    | Hypomethylated in FP vs FN |
| cg25078137 | 0.232   | 0.533   | -0.301    | 3e-05            | NA                    | Hypomethylated in FP vs FN |
| cg08250135 | 0.569   | 0.823   | -0.254    | 3e-05            | NA                    | Hypomethylated in FP vs FN |
| cg04292442 | 0.410   | 0.682   | -0.272    | 3e-05            | NA                    | Hypomethylated in FP vs FN |
| cg17101450 | 0.337   | 0.743   | -0.407    | 3e-05            | NA                    | Hypomethylated in FP vs FN |
| cg09601175 | 0.319   | 0.662   | -0.343    | 3e-05            | NA                    | Hypomethylated in FP vs FN |
| cg11409060 | 0.200   | 0.460   | -0.259    | 3e-05            | ATF7IP                | Hypomethylated in FP vs FN |
| cg08324862 | 0.389   | 0.682   | -0.293    | 3e-05            | NA                    | Hypomethylated in FP vs FN |
| cg27300957 | 0.274   | 0.573   | -0.299    | 3e-05            | NA                    | Hypomethylated in FP vs FN |
| cg02168442 | 0.433   | 0.769   | -0.337    | 3e-05            | NA                    | Hypomethylated in FP vs FN |
| cg12050271 | 0.230   | 0.638   | -0.408    | 3e-05            | NA                    | Hypomethylated in FP vs FN |
| cg06234741 | 0.356   | 0.637   | -0.281    | 3e-05            | NA                    | Hypomethylated in FP vs FN |
| cg01555614 | 0.244   | 0.632   | -0.388    | 3e-05            | TFAP2B                | Hypomethylated in FP vs FN |
| cg00495811 | 0.322   | 0.603   | -0.282    | 3e-05            | NA                    | Hypomethylated in FP vs FN |
| cg20582976 | 0.505   | 0.758   | -0.253    | 3e-05            | NA                    | Hypomethylated in FP vs FN |
| cg08168580 | 0.200   | 0.516   | -0.316    | 3e-05            | NA                    | Hypomethylated in FP vs FN |
| cg01034654 | 0.449   | 0.707   | -0.259    | 3e-05            | NA                    | Hypomethylated in FP vs FN |
| cg13210595 | 0.430   | 0.687   | -0.257    | 3e-05            | NA                    | Hypomethylated in FP vs FN |
| cg26620021 | 0.412   | 0.668   | -0.257    | 3e-05            | MIR641                | Hypomethylated in FP vs FN |
| cg03746851 | 0.455   | 0.707   | -0.251    | 3e-05            | NA                    | Hypomethylated in FP vs FN |
| cg13705391 | 0.370   | 0.684   | -0.314    | 3e-05            | NA                    | Hypomethylated in FP vs FN |
| cg16397176 | 0.347   | 0.649   | -0.302    | 3e-05            | NA                    | Hypomethylated in FP vs FN |
| cg25339566 | 0.195   | 0.590   | -0.395    | 3e-05            | TCTEX1D1              | Hypomethylated in FP vs FN |

**Supplementary Table 7 (continued)**

| Probe      | FP.mean | FN.mean | Mean.diff | Adjusted.P.value | Promoter.related.gene | Category                   |
|------------|---------|---------|-----------|------------------|-----------------------|----------------------------|
| cg08398132 | 0.420   | 0.729   | -0.308    | 3e-05            | NA                    | Hypomethylated in FP vs FN |
| cg26809635 | 0.324   | 0.751   | -0.427    | 3e-05            | NA                    | Hypomethylated in FP vs FN |
| cg14790739 | 0.612   | 0.892   | -0.280    | 3e-05            | NA                    | Hypomethylated in FP vs FN |
| cg25683575 | 0.324   | 0.646   | -0.323    | 3e-05            | NA                    | Hypomethylated in FP vs FN |
| cg21699044 | 0.361   | 0.709   | -0.348    | 3e-05            | NA                    | Hypomethylated in FP vs FN |
| cg18786782 | 0.316   | 0.605   | -0.289    | 3e-05            | NA                    | Hypomethylated in FP vs FN |
| cg17701417 | 0.285   | 0.648   | -0.363    | 3e-05            | NA                    | Hypomethylated in FP vs FN |
| cg12794567 | 0.327   | 0.643   | -0.316    | 3e-05            | NA                    | Hypomethylated in FP vs FN |
| cg13840520 | 0.355   | 0.691   | -0.336    | 3e-05            | NA                    | Hypomethylated in FP vs FN |
| cg06153883 | 0.439   | 0.696   | -0.257    | 3e-05            | NA                    | Hypomethylated in FP vs FN |
| cg27554973 | 0.363   | 0.710   | -0.347    | 3e-05            | NA                    | Hypomethylated in FP vs FN |
| cg11476211 | 0.077   | 0.425   | -0.348    | 3e-05            | PRKCE                 | Hypomethylated in FP vs FN |
| cg09164580 | 0.251   | 0.604   | -0.353    | 3e-05            | NA                    | Hypomethylated in FP vs FN |
| cg19774627 | 0.333   | 0.613   | -0.280    | 3e-05            | NA                    | Hypomethylated in FP vs FN |
| cg11697474 | 0.370   | 0.624   | -0.254    | 3e-05            | NA                    | Hypomethylated in FP vs FN |
| cg26950369 | 0.484   | 0.735   | -0.250    | 3e-05            | NA                    | Hypomethylated in FP vs FN |
| cg12499872 | 0.343   | 0.638   | -0.295    | 3e-05            | NA                    | Hypomethylated in FP vs FN |
| cg21203902 | 0.458   | 0.733   | -0.276    | 3e-05            | NA                    | Hypomethylated in FP vs FN |
| cg24712354 | 0.383   | 0.661   | -0.279    | 3e-05            | NA                    | Hypomethylated in FP vs FN |
| cg09842331 | 0.205   | 0.520   | -0.314    | 3e-05            | NA                    | Hypomethylated in FP vs FN |
| cg07177852 | 0.245   | 0.585   | -0.341    | 3e-05            | CCDC68                | Hypomethylated in FP vs FN |
| cg19709608 | 0.342   | 0.623   | -0.282    | 3e-05            | NA                    | Hypomethylated in FP vs FN |
| cg08801795 | 0.320   | 0.686   | -0.367    | 3e-05            | NA                    | Hypomethylated in FP vs FN |
| cg15478401 | 0.304   | 0.621   | -0.317    | 3e-05            | NA                    | Hypomethylated in FP vs FN |
| cg14663965 | 0.409   | 0.708   | -0.298    | 3e-05            | NA                    | Hypomethylated in FP vs FN |

### Supplementary Table 7 (continued)

| Probe      | FP.mean | FN.mean | Mean.diff | Adjusted.P.value | Promoter.related.gene | Category                   |
|------------|---------|---------|-----------|------------------|-----------------------|----------------------------|
| cg11663667 | 0.335   | 0.662   | -0.327    | 3e-05            | NA                    | Hypomethylated in FP vs FN |
| cg00834400 | 0.089   | 0.421   | -0.332    | 3e-05            | NA                    | Hypomethylated in FP vs FN |
| cg16290866 | 0.254   | 0.597   | -0.343    | 3e-05            | NA                    | Hypomethylated in FP vs FN |
| cg18217706 | 0.391   | 0.655   | -0.264    | 3e-05            | NA                    | Hypomethylated in FP vs FN |
| cg06681396 | 0.260   | 0.679   | -0.419    | 3e-05            | NA                    | Hypomethylated in FP vs FN |
| cg04272086 | 0.200   | 0.469   | -0.268    | 3e-05            | NA                    | Hypomethylated in FP vs FN |
| cg12435415 | 0.168   | 0.541   | -0.373    | 4e-05            | NA                    | Hypomethylated in FP vs FN |
| cg00358936 | 0.426   | 0.715   | -0.289    | 4e-05            | KISS1                 | Hypomethylated in FP vs FN |
| cg21236177 | 0.290   | 0.561   | -0.271    | 4e-05            | NA                    | Hypomethylated in FP vs FN |
| cg16574155 | 0.363   | 0.640   | -0.277    | 4e-05            | C1orf172              | Hypomethylated in FP vs FN |
| cg17741986 | 0.280   | 0.551   | -0.271    | 4e-05            | ZNF454                | Hypomethylated in FP vs FN |
| cg02470871 | 0.216   | 0.501   | -0.285    | 4e-05            | CD80                  | Hypomethylated in FP vs FN |
| cg02601249 | 0.410   | 0.693   | -0.283    | 4e-05            | NA                    | Hypomethylated in FP vs FN |
| cg03190379 | 0.295   | 0.622   | -0.327    | 4e-05            | NA                    | Hypomethylated in FP vs FN |
| cg13922451 | 0.142   | 0.439   | -0.297    | 4e-05            | NA                    | Hypomethylated in FP vs FN |
| cg25542041 | 0.165   | 0.549   | -0.385    | 4e-05            | NA                    | Hypomethylated in FP vs FN |
| cg05605603 | 0.517   | 0.770   | -0.253    | 4e-05            | NA                    | Hypomethylated in FP vs FN |
| cg20139247 | 0.128   | 0.436   | -0.308    | 4e-05            | NA                    | Hypomethylated in FP vs FN |
| cg26188685 | 0.421   | 0.681   | -0.260    | 4e-05            | NA                    | Hypomethylated in FP vs FN |
| cg17621190 | 0.449   | 0.710   | -0.261    | 4e-05            | NA                    | Hypomethylated in FP vs FN |
| cg00827210 | 0.307   | 0.597   | -0.290    | 4e-05            | NA                    | Hypomethylated in FP vs FN |
| cg12243622 | 0.385   | 0.716   | -0.332    | 4e-05            | NA                    | Hypomethylated in FP vs FN |
| cg16332159 | 0.239   | 0.498   | -0.259    | 4e-05            | APOB48R               | Hypomethylated in FP vs FN |
| cg07548668 | 0.546   | 0.803   | -0.257    | 4e-05            | NA                    | Hypomethylated in FP vs FN |
| cg13499318 | 0.412   | 0.721   | -0.309    | 4e-05            | NA                    | Hypomethylated in FP vs FN |

### Supplementary Table 7 (continued)

| Probe      | FP.mean | FN.mean | Mean.diff | Adjusted.P.value | Promoter.related.gene | Category                   |
|------------|---------|---------|-----------|------------------|-----------------------|----------------------------|
| cg04987335 | 0.295   | 0.568   | -0.274    | 4e-05            | NA                    | Hypomethylated in FP vs FN |
| cg07454154 | 0.353   | 0.681   | -0.328    | 4e-05            | NA                    | Hypomethylated in FP vs FN |
| cg13210580 | 0.306   | 0.612   | -0.306    | 4e-05            | NA                    | Hypomethylated in FP vs FN |
| cg01857748 | 0.389   | 0.724   | -0.335    | 4e-05            | NA                    | Hypomethylated in FP vs FN |
| cg10896862 | 0.252   | 0.610   | -0.358    | 4e-05            | NA                    | Hypomethylated in FP vs FN |
| cg13453157 | 0.369   | 0.696   | -0.327    | 4e-05            | NA                    | Hypomethylated in FP vs FN |
| cg00100440 | 0.427   | 0.738   | -0.312    | 4e-05            | NA                    | Hypomethylated in FP vs FN |
| cg06804411 | 0.427   | 0.714   | -0.287    | 4e-05            | LELP1                 | Hypomethylated in FP vs FN |
| cg07818422 | 0.387   | 0.717   | -0.330    | 4e-05            | NA                    | Hypomethylated in FP vs FN |
| cg03089940 | 0.429   | 0.700   | -0.271    | 4e-05            | NA                    | Hypomethylated in FP vs FN |
| cg09178190 | 0.274   | 0.605   | -0.331    | 4e-05            | PCDHB6                | Hypomethylated in FP vs FN |
| cg24375215 | 0.350   | 0.661   | -0.311    | 4e-05            | CD300A                | Hypomethylated in FP vs FN |
| cg00433861 | 0.337   | 0.622   | -0.284    | 4e-05            | NA                    | Hypomethylated in FP vs FN |
| cg15848364 | 0.388   | 0.667   | -0.278    | 4e-05            | NA                    | Hypomethylated in FP vs FN |
| cg09335647 | 0.315   | 0.580   | -0.266    | 4e-05            | NA                    | Hypomethylated in FP vs FN |
| cg18252903 | 0.296   | 0.665   | -0.370    | 4e-05            | NA                    | Hypomethylated in FP vs FN |
| cg18750960 | 0.524   | 0.802   | -0.278    | 4e-05            | HOXD4                 | Hypomethylated in FP vs FN |
| cg04361019 | 0.421   | 0.732   | -0.311    | 4e-05            | NA                    | Hypomethylated in FP vs FN |
| cg22923154 | 0.525   | 0.783   | -0.258    | 4e-05            | NA                    | Hypomethylated in FP vs FN |
| cg10680621 | 0.246   | 0.549   | -0.303    | 4e-05            | NA                    | Hypomethylated in FP vs FN |
| cg07690882 | 0.412   | 0.765   | -0.352    | 4e-05            | NA                    | Hypomethylated in FP vs FN |
| cg16608443 | 0.227   | 0.506   | -0.278    | 4e-05            | NA                    | Hypomethylated in FP vs FN |
| cg11702085 | 0.334   | 0.666   | -0.333    | 4e-05            | NA                    | Hypomethylated in FP vs FN |
| cg24642320 | 0.062   | 0.391   | -0.329    | 4e-05            | NA                    | Hypomethylated in FP vs FN |
| cg16464506 | 0.441   | 0.719   | -0.278    | 4e-05            | NA                    | Hypomethylated in FP vs FN |

### Supplementary Table 7 (continued)

| Probe      | FP.mean | FN.mean | Mean.diff | Adjusted.P.value | Promoter.related.gene | Category                   |
|------------|---------|---------|-----------|------------------|-----------------------|----------------------------|
| cg25343204 | 0.565   | 0.820   | -0.255    | 4e-05            | NA                    | Hypomethylated in FP vs FN |
| cg13998145 | 0.586   | 0.843   | -0.257    | 4e-05            | NA                    | Hypomethylated in FP vs FN |
| cg19747744 | 0.495   | 0.776   | -0.280    | 4e-05            | NA                    | Hypomethylated in FP vs FN |
| cg25818605 | 0.366   | 0.665   | -0.300    | 4e-05            | NA                    | Hypomethylated in FP vs FN |
| cg03417342 | 0.074   | 0.456   | -0.382    | 4e-05            | PEX11A_WDR93          | Hypomethylated in FP vs FN |
| cg24801123 | 0.159   | 0.442   | -0.283    | 4e-05            | NA                    | Hypomethylated in FP vs FN |
| cg01197302 | 0.395   | 0.727   | -0.332    | 4e-05            | NA                    | Hypomethylated in FP vs FN |
| cg07271996 | 0.308   | 0.589   | -0.282    | 4e-05            | NA                    | Hypomethylated in FP vs FN |
| cg16168014 | 0.327   | 0.669   | -0.342    | 4e-05            | NA                    | Hypomethylated in FP vs FN |
| cg03372905 | 0.579   | 0.830   | -0.251    | 4e-05            | NA                    | Hypomethylated in FP vs FN |
| cg17462107 | 0.398   | 0.735   | -0.337    | 4e-05            | NA                    | Hypomethylated in FP vs FN |
| cg05893709 | 0.267   | 0.635   | -0.368    | 4e-05            | NA                    | Hypomethylated in FP vs FN |
| cg22396409 | 0.251   | 0.535   | -0.284    | 4e-05            | EGFR                  | Hypomethylated in FP vs FN |
| cg06924241 | 0.278   | 0.565   | -0.287    | 4e-05            | NA                    | Hypomethylated in FP vs FN |
| cg15207826 | 0.265   | 0.581   | -0.315    | 4e-05            | NA                    | Hypomethylated in FP vs FN |
| cg00679731 | 0.236   | 0.525   | -0.289    | 4e-05            | NA                    | Hypomethylated in FP vs FN |
| cg13681940 | 0.246   | 0.539   | -0.294    | 4e-05            | NA                    | Hypomethylated in FP vs FN |
| cg26796518 | 0.318   | 0.683   | -0.366    | 4e-05            | NA                    | Hypomethylated in FP vs FN |
| cg02350677 | 0.134   | 0.489   | -0.356    | 4e-05            | NA                    | Hypomethylated in FP vs FN |
| cg22275864 | 0.476   | 0.793   | -0.318    | 4e-05            | NA                    | Hypomethylated in FP vs FN |
| cg07695089 | 0.437   | 0.716   | -0.279    | 4e-05            | NA                    | Hypomethylated in FP vs FN |
| cg02147126 | 0.386   | 0.643   | -0.257    | 4e-05            | AZU1                  | Hypomethylated in FP vs FN |
| cg20697984 | 0.139   | 0.488   | -0.349    | 4e-05            | NHLRC1                | Hypomethylated in FP vs FN |
| cg14181940 | 0.342   | 0.645   | -0.303    | 4e-05            | NA                    | Hypomethylated in FP vs FN |
| cg21609584 | 0.464   | 0.739   | -0.275    | 4e-05            | NA                    | Hypomethylated in FP vs FN |

### Supplementary Table 7 (continued)

| Probe      | FP.mean | FN.mean | Mean.diff | Adjusted.P.value | Promoter.related.gene | Category                   |
|------------|---------|---------|-----------|------------------|-----------------------|----------------------------|
| cg02032558 | 0.299   | 0.637   | -0.338    | 4e-05            | NA                    | Hypomethylated in FP vs FN |
| cg06067842 | 0.209   | 0.538   | -0.329    | 4e-05            | TMEM26                | Hypomethylated in FP vs FN |
| cg09839235 | 0.469   | 0.849   | -0.381    | 4e-05            | NA                    | Hypomethylated in FP vs FN |
| cg09660365 | 0.120   | 0.389   | -0.269    | 4e-05            | NA                    | Hypomethylated in FP vs FN |
| cg03483626 | 0.362   | 0.661   | -0.299    | 4e-05            | KCNA3                 | Hypomethylated in FP vs FN |
| cg21435684 | 0.187   | 0.596   | -0.409    | 4e-05            | NA                    | Hypomethylated in FP vs FN |
| cg20092728 | 0.498   | 0.789   | -0.291    | 4e-05            | SLC5A12               | Hypomethylated in FP vs FN |
| cg23480730 | 0.338   | 0.706   | -0.368    | 4e-05            | NA                    | Hypomethylated in FP vs FN |
| cg12103152 | 0.210   | 0.564   | -0.354    | 4e-05            | HTR1B                 | Hypomethylated in FP vs FN |
| cg19958593 | 0.530   | 0.828   | -0.299    | 4e-05            | NA                    | Hypomethylated in FP vs FN |
| cg20090301 | 0.326   | 0.591   | -0.265    | 4e-05            | NA                    | Hypomethylated in FP vs FN |
| cg05046306 | 0.302   | 0.610   | -0.308    | 4e-05            | NA                    | Hypomethylated in FP vs FN |
| cg18739089 | 0.332   | 0.597   | -0.265    | 4e-05            | NA                    | Hypomethylated in FP vs FN |
| cg14716990 | 0.365   | 0.717   | -0.352    | 4e-05            | NA                    | Hypomethylated in FP vs FN |
| cg02563530 | 0.390   | 0.648   | -0.257    | 4e-05            | NA                    | Hypomethylated in FP vs FN |
| cg12422539 | 0.444   | 0.755   | -0.312    | 4e-05            | NA                    | Hypomethylated in FP vs FN |
| cg05285582 | 0.218   | 0.600   | -0.381    | 4e-05            | NA                    | Hypomethylated in FP vs FN |
| cg15460739 | 0.515   | 0.781   | -0.266    | 4e-05            | NA                    | Hypomethylated in FP vs FN |
| cg07061582 | 0.103   | 0.399   | -0.297    | 4e-05            | PEX11A_WDR93          | Hypomethylated in FP vs FN |
| cg25714154 | 0.503   | 0.794   | -0.291    | 4e-05            | NA                    | Hypomethylated in FP vs FN |
| cg12558090 | 0.374   | 0.634   | -0.260    | 4e-05            | NA                    | Hypomethylated in FP vs FN |
| cg11067552 | 0.337   | 0.623   | -0.285    | 4e-05            | NA                    | Hypomethylated in FP vs FN |
| cg10752406 | 0.216   | 0.516   | -0.300    | 4e-05            | AZU1                  | Hypomethylated in FP vs FN |
| cg08549390 | 0.481   | 0.784   | -0.303    | 4e-05            | NA                    | Hypomethylated in FP vs FN |
| cg05373723 | 0.182   | 0.503   | -0.321    | 4e-05            | NA                    | Hypomethylated in FP vs FN |



### Supplementary Table 7 (continued)

| Probe      | FP.mean | FN.mean | Mean.diff | Adjusted.P.value | Promoter.related.gene | Category                   |
|------------|---------|---------|-----------|------------------|-----------------------|----------------------------|
| cg17878151 | 0.425   | 0.677   | -0.253    | 4e-05            | NA                    | Hypomethylated in FP vs FN |
| cg25309775 | 0.540   | 0.794   | -0.254    | 4e-05            | ZNF283                | Hypomethylated in FP vs FN |
| cg12866960 | 0.587   | 0.867   | -0.280    | 4e-05            | NA                    | Hypomethylated in FP vs FN |
| cg12770539 | 0.338   | 0.630   | -0.292    | 4e-05            | NA                    | Hypomethylated in FP vs FN |
| cg03350993 | 0.278   | 0.601   | -0.323    | 4e-05            | TSPAN16               | Hypomethylated in FP vs FN |
| cg06940505 | 0.360   | 0.678   | -0.318    | 4e-05            | NA                    | Hypomethylated in FP vs FN |
| cg11176990 | 0.141   | 0.439   | -0.298    | 4e-05            | LOC375196             | Hypomethylated in FP vs FN |
| cg02379079 | 0.273   | 0.535   | -0.262    | 4e-05            | LBP                   | Hypomethylated in FP vs FN |
| cg25294504 | 0.490   | 0.767   | -0.278    | 4e-05            | NA                    | Hypomethylated in FP vs FN |
| cg11638320 | 0.339   | 0.638   | -0.299    | 4e-05            | NA                    | Hypomethylated in FP vs FN |
| cg01506492 | 0.128   | 0.534   | -0.406    | 4e-05            | NA                    | Hypomethylated in FP vs FN |
| cg26186331 | 0.345   | 0.627   | -0.281    | 4e-05            | NA                    | Hypomethylated in FP vs FN |
| cg12060499 | 0.380   | 0.750   | -0.369    | 4e-05            | NA                    | Hypomethylated in FP vs FN |
| cg25182501 | 0.456   | 0.717   | -0.261    | 4e-05            | NA                    | Hypomethylated in FP vs FN |
| cg12368612 | 0.267   | 0.613   | -0.346    | 4e-05            | NA                    | Hypomethylated in FP vs FN |
| cg03249630 | 0.502   | 0.767   | -0.264    | 4e-05            | ANKRD22               | Hypomethylated in FP vs FN |
| cg08285915 | 0.207   | 0.460   | -0.252    | 4e-05            | NEUROG1               | Hypomethylated in FP vs FN |
| cg03742250 | 0.342   | 0.594   | -0.252    | 4e-05            | NA                    | Hypomethylated in FP vs FN |
| cg26837773 | 0.506   | 0.789   | -0.283    | 4e-05            | NA                    | Hypomethylated in FP vs FN |
| cg09043104 | 0.327   | 0.618   | -0.291    | 4e-05            | NA                    | Hypomethylated in FP vs FN |
| cg26358374 | 0.385   | 0.640   | -0.254    | 4e-05            | NA                    | Hypomethylated in FP vs FN |
| cg05858889 | 0.184   | 0.485   | -0.301    | 4e-05            | NA                    | Hypomethylated in FP vs FN |
| cg05816786 | 0.306   | 0.610   | -0.304    | 4e-05            | NA                    | Hypomethylated in FP vs FN |
| cg25266629 | 0.344   | 0.710   | -0.366    | 4e-05            | NA                    | Hypomethylated in FP vs FN |
| cg18121003 | 0.368   | 0.728   | -0.360    | 4e-05            | CCDC81                | Hypomethylated in FP vs FN |

### Supplementary Table 7 (continued)

| Probe      | FP.mean | FN.mean | Mean.diff | Adjusted.P.value | Promoter.related.gene | Category                   |
|------------|---------|---------|-----------|------------------|-----------------------|----------------------------|
| cg12504247 | 0.456   | 0.723   | -0.267    | 4e-05            | NA                    | Hypomethylated in FP vs FN |
| cg18338822 | 0.550   | 0.802   | -0.251    | 4e-05            | NA                    | Hypomethylated in FP vs FN |
| cg14350312 | 0.270   | 0.569   | -0.299    | 4e-05            | NA                    | Hypomethylated in FP vs FN |
| cg21160290 | 0.254   | 0.542   | -0.288    | 4e-05            | NA                    | Hypomethylated in FP vs FN |
| cg23242898 | 0.153   | 0.420   | -0.268    | 4e-05            | NA                    | Hypomethylated in FP vs FN |
| cg20253468 | 0.119   | 0.488   | -0.369    | 4e-05            | NA                    | Hypomethylated in FP vs FN |
| cg25354466 | 0.283   | 0.616   | -0.332    | 4e-05            | NA                    | Hypomethylated in FP vs FN |
| cg09324001 | 0.413   | 0.732   | -0.318    | 4e-05            | NA                    | Hypomethylated in FP vs FN |
| cg02632261 | 0.459   | 0.711   | -0.252    | 4e-05            | NA                    | Hypomethylated in FP vs FN |
| cg25456368 | 0.341   | 0.676   | -0.335    | 4e-05            | NA                    | Hypomethylated in FP vs FN |
| cg23075139 | 0.325   | 0.653   | -0.328    | 4e-05            | NA                    | Hypomethylated in FP vs FN |
| cg02969500 | 0.498   | 0.793   | -0.296    | 4e-05            | NA                    | Hypomethylated in FP vs FN |
| cg23565942 | 0.134   | 0.507   | -0.372    | 4e-05            | NEBL                  | Hypomethylated in FP vs FN |
| cg25503695 | 0.279   | 0.624   | -0.345    | 4e-05            | NA                    | Hypomethylated in FP vs FN |
| cg11792766 | 0.421   | 0.671   | -0.251    | 4e-05            | NA                    | Hypomethylated in FP vs FN |
| cg12026992 | 0.320   | 0.634   | -0.314    | 4e-05            | NA                    | Hypomethylated in FP vs FN |
| cg10953317 | 0.196   | 0.463   | -0.267    | 4e-05            | CD300A                | Hypomethylated in FP vs FN |
| cg19500098 | 0.139   | 0.397   | -0.258    | 4e-05            | NA                    | Hypomethylated in FP vs FN |
| cg25623174 | 0.561   | 0.895   | -0.334    | 4e-05            | NA                    | Hypomethylated in FP vs FN |
| cg00996827 | 0.297   | 0.619   | -0.322    | 4e-05            | NA                    | Hypomethylated in FP vs FN |
| cg04872848 | 0.238   | 0.553   | -0.315    | 4e-05            | FLVCR2                | Hypomethylated in FP vs FN |
| cg27179474 | 0.443   | 0.706   | -0.263    | 4e-05            | NA                    | Hypomethylated in FP vs FN |
| cg23548455 | 0.386   | 0.697   | -0.311    | 4e-05            | NA                    | Hypomethylated in FP vs FN |
| cg00929871 | 0.531   | 0.805   | -0.274    | 4e-05            | NA                    | Hypomethylated in FP vs FN |
| cg22302929 | 0.431   | 0.692   | -0.261    | 4e-05            | SCAND3                | Hypomethylated in FP vs FN |

### Supplementary Table 7 (continued)

| Probe      | FP.mean | FN.mean | Mean.diff | Adjusted.P.value | Promoter.related.gene | Category                   |
|------------|---------|---------|-----------|------------------|-----------------------|----------------------------|
| cg19260567 | 0.284   | 0.535   | -0.251    | 4e-05            | NA                    | Hypomethylated in FP vs FN |
| cg21446955 | 0.246   | 0.499   | -0.253    | 4e-05            | ARHGAP24              | Hypomethylated in FP vs FN |
| cg10024484 | 0.326   | 0.680   | -0.354    | 4e-05            | NA                    | Hypomethylated in FP vs FN |
| cg24512138 | 0.187   | 0.450   | -0.263    | 4e-05            | NA                    | Hypomethylated in FP vs FN |
| cg11977686 | 0.072   | 0.414   | -0.342    | 4e-05            | ZNF671                | Hypomethylated in FP vs FN |
| cg02552250 | 0.178   | 0.460   | -0.282    | 4e-05            | NA                    | Hypomethylated in FP vs FN |
| cg11121623 | 0.344   | 0.617   | -0.273    | 4e-05            | NA                    | Hypomethylated in FP vs FN |
| cg08423857 | 0.199   | 0.488   | -0.289    | 4e-05            | NA                    | Hypomethylated in FP vs FN |
| cg11827629 | 0.504   | 0.784   | -0.279    | 4e-05            | NA                    | Hypomethylated in FP vs FN |
| cg04932056 | 0.265   | 0.597   | -0.332    | 4e-05            | SPAG9                 | Hypomethylated in FP vs FN |
| cg02838492 | 0.323   | 0.664   | -0.341    | 4e-05            | KIF12                 | Hypomethylated in FP vs FN |
| cg12269138 | 0.387   | 0.685   | -0.298    | 4e-05            | NA                    | Hypomethylated in FP vs FN |
| cg25506747 | 0.312   | 0.590   | -0.278    | 4e-05            | NA                    | Hypomethylated in FP vs FN |
| cg23532322 | 0.355   | 0.618   | -0.263    | 4e-05            | NA                    | Hypomethylated in FP vs FN |
| cg00893471 | 0.202   | 0.512   | -0.309    | 4e-05            | NA                    | Hypomethylated in FP vs FN |
| cg18229820 | 0.446   | 0.732   | -0.286    | 4e-05            | NA                    | Hypomethylated in FP vs FN |
| cg03337430 | 0.488   | 0.745   | -0.257    | 4e-05            | EPHX1                 | Hypomethylated in FP vs FN |
| cg01827633 | 0.396   | 0.695   | -0.299    | 4e-05            | NA                    | Hypomethylated in FP vs FN |
| cg18145026 | 0.332   | 0.634   | -0.301    | 4e-05            | NA                    | Hypomethylated in FP vs FN |
| cg22016995 | 0.364   | 0.715   | -0.350    | 4e-05            | NA                    | Hypomethylated in FP vs FN |
| cg09253679 | 0.438   | 0.698   | -0.260    | 4e-05            | NA                    | Hypomethylated in FP vs FN |
| cg27541454 | 0.153   | 0.494   | -0.341    | 4e-05            | NA                    | Hypomethylated in FP vs FN |
| cg13019868 | 0.538   | 0.790   | -0.252    | 4e-05            | NA                    | Hypomethylated in FP vs FN |
| cg11824639 | 0.165   | 0.496   | -0.331    | 4e-05            | TCTEX1D1              | Hypomethylated in FP vs FN |
| cg18797653 | 0.445   | 0.715   | -0.270    | 4e-05            | MIR886                | Hypomethylated in FP vs FN |

### Supplementary Table 7 (continued)

| Probe      | FP.mean | FN.mean | Mean.diff | Adjusted.P.value | Promoter.related.gene | Category                   |
|------------|---------|---------|-----------|------------------|-----------------------|----------------------------|
| cg16049690 | 0.157   | 0.491   | -0.334    | 4e-05            | NA                    | Hypomethylated in FP vs FN |
| cg02744046 | 0.278   | 0.579   | -0.301    | 4e-05            | NA                    | Hypomethylated in FP vs FN |
| cg10147797 | 0.116   | 0.423   | -0.306    | 4e-05            | SDR42E1               | Hypomethylated in FP vs FN |
| cg05207834 | 0.350   | 0.726   | -0.376    | 4e-05            | SPAG9                 | Hypomethylated in FP vs FN |
| cg26808144 | 0.582   | 0.838   | -0.256    | 4e-05            | NTM                   | Hypomethylated in FP vs FN |
| cg00672633 | 0.509   | 0.762   | -0.253    | 4e-05            | NA                    | Hypomethylated in FP vs FN |
| cg10859358 | 0.436   | 0.739   | -0.303    | 4e-05            | TTN                   | Hypomethylated in FP vs FN |
| cg20495179 | 0.473   | 0.769   | -0.296    | 4e-05            | NA                    | Hypomethylated in FP vs FN |
| cg01081096 | 0.334   | 0.591   | -0.257    | 4e-05            | ATG9B                 | Hypomethylated in FP vs FN |
| cg13407262 | 0.534   | 0.812   | -0.278    | 4e-05            | NA                    | Hypomethylated in FP vs FN |
| cg25909885 | 0.423   | 0.710   | -0.287    | 4e-05            | NAV2                  | Hypomethylated in FP vs FN |
| cg15415136 | 0.164   | 0.495   | -0.330    | 5e-05            | ZNF540                | Hypomethylated in FP vs FN |
| cg11414913 | 0.255   | 0.585   | -0.331    | 5e-05            | NA                    | Hypomethylated in FP vs FN |
| cg17223866 | 0.352   | 0.605   | -0.253    | 5e-05            | NA                    | Hypomethylated in FP vs FN |
| cg08832624 | 0.287   | 0.694   | -0.408    | 5e-05            | NA                    | Hypomethylated in FP vs FN |
| cg01804233 | 0.495   | 0.767   | -0.272    | 5e-05            | NA                    | Hypomethylated in FP vs FN |
| cg17272563 | 0.444   | 0.703   | -0.259    | 5e-05            | NA                    | Hypomethylated in FP vs FN |
| cg02668999 | 0.358   | 0.696   | -0.337    | 5e-05            | NA                    | Hypomethylated in FP vs FN |
| cg01588826 | 0.348   | 0.665   | -0.317    | 5e-05            | NA                    | Hypomethylated in FP vs FN |
| cg00924017 | 0.379   | 0.696   | -0.318    | 5e-05            | NA                    | Hypomethylated in FP vs FN |
| cg22613854 | 0.384   | 0.670   | -0.286    | 5e-05            | NA                    | Hypomethylated in FP vs FN |
| cg14442405 | 0.331   | 0.618   | -0.286    | 5e-05            | NA                    | Hypomethylated in FP vs FN |
| cg16137498 | 0.433   | 0.714   | -0.281    | 5e-05            | NA                    | Hypomethylated in FP vs FN |
| cg16592121 | 0.189   | 0.478   | -0.289    | 5e-05            | NA                    | Hypomethylated in FP vs FN |
| cg03740666 | 0.335   | 0.605   | -0.270    | 5e-05            | NA                    | Hypomethylated in FP vs FN |

### Supplementary Table 7 (continued)

| Probe      | FP.mean | FN.mean | Mean.diff | Adjusted.P.value | Promoter.related.gene | Category                   |
|------------|---------|---------|-----------|------------------|-----------------------|----------------------------|
| cg22714290 | 0.453   | 0.804   | -0.351    | 5e-05            | NA                    | Hypomethylated in FP vs FN |
| cg22959611 | 0.148   | 0.471   | -0.323    | 5e-05            | NHLRC1                | Hypomethylated in FP vs FN |
| cg16681436 | 0.297   | 0.556   | -0.259    | 5e-05            | NA                    | Hypomethylated in FP vs FN |
| cg01889143 | 0.276   | 0.692   | -0.417    | 5e-05            | NA                    | Hypomethylated in FP vs FN |
| cg25451958 | 0.199   | 0.615   | -0.416    | 5e-05            | NA                    | Hypomethylated in FP vs FN |
| cg02968407 | 0.513   | 0.814   | -0.301    | 5e-05            | NA                    | Hypomethylated in FP vs FN |
| cg09176275 | 0.126   | 0.388   | -0.262    | 5e-05            | C1orf87               | Hypomethylated in FP vs FN |
| cg08958294 | 0.119   | 0.490   | -0.371    | 5e-05            | NA                    | Hypomethylated in FP vs FN |
| cg16296829 | 0.305   | 0.556   | -0.251    | 5e-05            | KCNN3                 | Hypomethylated in FP vs FN |
| cg01115389 | 0.257   | 0.540   | -0.283    | 5e-05            | NA                    | Hypomethylated in FP vs FN |
| cg11920765 | 0.584   | 0.842   | -0.259    | 5e-05            | NA                    | Hypomethylated in FP vs FN |
| cg07388347 | 0.198   | 0.530   | -0.331    | 5e-05            | NA                    | Hypomethylated in FP vs FN |
| cg05418508 | 0.388   | 0.727   | -0.338    | 5e-05            | NA                    | Hypomethylated in FP vs FN |
| cg15480919 | 0.368   | 0.623   | -0.255    | 5e-05            | DPCR1                 | Hypomethylated in FP vs FN |
| cg00019495 | 0.201   | 0.477   | -0.277    | 5e-05            | HOPX                  | Hypomethylated in FP vs FN |
| cg01184271 | 0.330   | 0.608   | -0.279    | 5e-05            | C2CD4B                | Hypomethylated in FP vs FN |
| cg17678139 | 0.408   | 0.716   | -0.308    | 5e-05            | NA                    | Hypomethylated in FP vs FN |
| cg02503874 | 0.186   | 0.466   | -0.280    | 5e-05            | FERD3L                | Hypomethylated in FP vs FN |
| cg07264025 | 0.438   | 0.770   | -0.332    | 5e-05            | NA                    | Hypomethylated in FP vs FN |
| cg02069243 | 0.431   | 0.721   | -0.290    | 5e-05            | NA                    | Hypomethylated in FP vs FN |
| cg24963147 | 0.294   | 0.598   | -0.304    | 5e-05            | LOC389332             | Hypomethylated in FP vs FN |
| cg00866690 | 0.556   | 0.810   | -0.255    | 5e-05            | NA                    | Hypomethylated in FP vs FN |
| cg16658618 | 0.515   | 0.777   | -0.262    | 5e-05            | NA                    | Hypomethylated in FP vs FN |
| cg25543773 | 0.450   | 0.715   | -0.265    | 5e-05            | NA                    | Hypomethylated in FP vs FN |
| cg18703227 | 0.482   | 0.755   | -0.272    | 5e-05            | LEMD2                 | Hypomethylated in FP vs FN |

### Supplementary Table 7 (continued)

| Probe      | FP.mean | FN.mean | Mean.diff | Adjusted.P.value | Promoter.related.gene | Category                   |
|------------|---------|---------|-----------|------------------|-----------------------|----------------------------|
| cg18250838 | 0.262   | 0.610   | -0.348    | 5e-05            | CRABP1                | Hypomethylated in FP vs FN |
| cg23424273 | 0.086   | 0.478   | -0.393    | 5e-05            | HTR1B                 | Hypomethylated in FP vs FN |
| cg27518238 | 0.485   | 0.754   | -0.269    | 5e-05            | NA                    | Hypomethylated in FP vs FN |
| cg00955096 | 0.160   | 0.532   | -0.372    | 5e-05            | TPD52L1               | Hypomethylated in FP vs FN |
| cg05204532 | 0.373   | 0.673   | -0.301    | 5e-05            | NA                    | Hypomethylated in FP vs FN |
| cg03037974 | 0.384   | 0.668   | -0.283    | 5e-05            | NA                    | Hypomethylated in FP vs FN |
| cg08031151 | 0.286   | 0.628   | -0.342    | 5e-05            | NA                    | Hypomethylated in FP vs FN |
| cg01607530 | 0.316   | 0.614   | -0.299    | 5e-05            | NA                    | Hypomethylated in FP vs FN |
| cg18755226 | 0.451   | 0.723   | -0.272    | 5e-05            | NA                    | Hypomethylated in FP vs FN |
| cg22231400 | 0.325   | 0.687   | -0.362    | 5e-05            | NA                    | Hypomethylated in FP vs FN |
| cg26548574 | 0.320   | 0.655   | -0.335    | 5e-05            | NA                    | Hypomethylated in FP vs FN |
| cg23170410 | 0.383   | 0.682   | -0.299    | 5e-05            | NA                    | Hypomethylated in FP vs FN |
| cg15626881 | 0.498   | 0.773   | -0.276    | 5e-05            | NA                    | Hypomethylated in FP vs FN |
| cg24733450 | 0.240   | 0.565   | -0.325    | 5e-05            | NA                    | Hypomethylated in FP vs FN |
| cg08488841 | 0.232   | 0.650   | -0.418    | 5e-05            | NA                    | Hypomethylated in FP vs FN |
| cg13733615 | 0.349   | 0.680   | -0.332    | 5e-05            | NA                    | Hypomethylated in FP vs FN |
| cg08250187 | 0.378   | 0.662   | -0.284    | 5e-05            | NA                    | Hypomethylated in FP vs FN |
| cg09145629 | 0.514   | 0.765   | -0.251    | 5e-05            | NA                    | Hypomethylated in FP vs FN |
| cg12914615 | 0.447   | 0.781   | -0.334    | 5e-05            | NA                    | Hypomethylated in FP vs FN |
| cg08918020 | 0.303   | 0.594   | -0.291    | 5e-05            | COX4I2                | Hypomethylated in FP vs FN |
| cg08660562 | 0.361   | 0.665   | -0.304    | 5e-05            | NA                    | Hypomethylated in FP vs FN |
| cg02094827 | 0.380   | 0.630   | -0.250    | 5e-05            | ZFYVE27               | Hypomethylated in FP vs FN |
| cg21826699 | 0.324   | 0.652   | -0.328    | 5e-05            | NA                    | Hypomethylated in FP vs FN |
| cg07185131 | 0.172   | 0.558   | -0.386    | 5e-05            | NA                    | Hypomethylated in FP vs FN |
| cg05573844 | 0.565   | 0.828   | -0.263    | 5e-05            | NA                    | Hypomethylated in FP vs FN |

### Supplementary Table 7 (continued)

| Probe      | FP.mean | FN.mean | Mean.diff | Adjusted.P.value | Promoter.related.gene | Category                   |
|------------|---------|---------|-----------|------------------|-----------------------|----------------------------|
| cg04810745 | 0.370   | 0.727   | -0.357    | 5e-05            | NA                    | Hypomethylated in FP vs FN |
| cg01048962 | 0.245   | 0.661   | -0.416    | 5e-05            | NA                    | Hypomethylated in FP vs FN |
| cg20933297 | 0.371   | 0.705   | -0.333    | 5e-05            | NA                    | Hypomethylated in FP vs FN |
| cg00999950 | 0.102   | 0.427   | -0.325    | 5e-05            | C4orf37               | Hypomethylated in FP vs FN |
| cg05272349 | 0.251   | 0.566   | -0.314    | 5e-05            | NA                    | Hypomethylated in FP vs FN |
| cg21342910 | 0.114   | 0.454   | -0.340    | 5e-05            | NA                    | Hypomethylated in FP vs FN |
| cg20080492 | 0.253   | 0.520   | -0.267    | 5e-05            | NA                    | Hypomethylated in FP vs FN |
| cg04434896 | 0.186   | 0.471   | -0.286    | 5e-05            | NA                    | Hypomethylated in FP vs FN |
| cg22158769 | 0.129   | 0.480   | -0.351    | 5e-05            | LOC375196             | Hypomethylated in FP vs FN |
| cg18885392 | 0.302   | 0.585   | -0.283    | 5e-05            | NA                    | Hypomethylated in FP vs FN |
| cg11966063 | 0.311   | 0.610   | -0.299    | 5e-05            | NA                    | Hypomethylated in FP vs FN |
| cg14479798 | 0.476   | 0.769   | -0.293    | 5e-05            | NA                    | Hypomethylated in FP vs FN |
| cg22561203 | 0.322   | 0.596   | -0.274    | 5e-05            | NA                    | Hypomethylated in FP vs FN |
| cg21777188 | 0.475   | 0.762   | -0.288    | 5e-05            | NA                    | Hypomethylated in FP vs FN |
| cg02071243 | 0.270   | 0.627   | -0.357    | 5e-05            | NA                    | Hypomethylated in FP vs FN |
| cg07064592 | 0.406   | 0.725   | -0.319    | 5e-05            | NA                    | Hypomethylated in FP vs FN |
| cg02737219 | 0.463   | 0.725   | -0.262    | 5e-05            | NA                    | Hypomethylated in FP vs FN |
| cg17876200 | 0.145   | 0.489   | -0.344    | 5e-05            | KLHDC9                | Hypomethylated in FP vs FN |
| cg08995089 | 0.106   | 0.393   | -0.287    | 5e-05            | PTEN_KILLIN           | Hypomethylated in FP vs FN |
| cg14291650 | 0.286   | 0.598   | -0.312    | 5e-05            | NA                    | Hypomethylated in FP vs FN |
| cg06547849 | 0.078   | 0.374   | -0.296    | 5e-05            | NA                    | Hypomethylated in FP vs FN |
| cg13010373 | 0.439   | 0.706   | -0.266    | 5e-05            | NA                    | Hypomethylated in FP vs FN |
| cg13390388 | 0.355   | 0.682   | -0.327    | 5e-05            | NA                    | Hypomethylated in FP vs FN |
| cg16182447 | 0.374   | 0.678   | -0.304    | 5e-05            | NA                    | Hypomethylated in FP vs FN |
| cg18265665 | 0.557   | 0.814   | -0.257    | 5e-05            | NA                    | Hypomethylated in FP vs FN |

### Supplementary Table 7 (continued)

| Probe      | FP.mean | FN.mean | Mean.diff | Adjusted.P.value | Promoter.related.gene | Category                   |
|------------|---------|---------|-----------|------------------|-----------------------|----------------------------|
| cg16530177 | 0.265   | 0.625   | -0.360    | 5e-05            | NA                    | Hypomethylated in FP vs FN |
| cg27553926 | 0.220   | 0.563   | -0.342    | 5e-05            | NA                    | Hypomethylated in FP vs FN |
| cg24091995 | 0.340   | 0.754   | -0.414    | 5e-05            | NA                    | Hypomethylated in FP vs FN |
| cg16091920 | 0.427   | 0.683   | -0.256    | 5e-05            | NA                    | Hypomethylated in FP vs FN |
| cg20461188 | 0.195   | 0.536   | -0.341    | 5e-05            | NA                    | Hypomethylated in FP vs FN |
| cg06264743 | 0.322   | 0.649   | -0.327    | 5e-05            | NA                    | Hypomethylated in FP vs FN |
| cg11781986 | 0.212   | 0.501   | -0.289    | 5e-05            | NA                    | Hypomethylated in FP vs FN |
| cg21531908 | 0.375   | 0.662   | -0.287    | 5e-05            | NA                    | Hypomethylated in FP vs FN |
| cg13784235 | 0.280   | 0.613   | -0.332    | 5e-05            | NA                    | Hypomethylated in FP vs FN |
| cg07962315 | 0.220   | 0.479   | -0.258    | 5e-05            | C9orf95               | Hypomethylated in FP vs FN |
| cg17634490 | 0.066   | 0.401   | -0.335    | 5e-05            | PEX11A_WDR93          | Hypomethylated in FP vs FN |
| cg08415998 | 0.378   | 0.629   | -0.250    | 5e-05            | NA                    | Hypomethylated in FP vs FN |
| cg16168509 | 0.330   | 0.612   | -0.282    | 5e-05            | NA                    | Hypomethylated in FP vs FN |
| cg24613558 | 0.527   | 0.804   | -0.277    | 5e-05            | NA                    | Hypomethylated in FP vs FN |
| cg25121621 | 0.220   | 0.509   | -0.289    | 5e-05            | SQRDL                 | Hypomethylated in FP vs FN |
| cg02111951 | 0.303   | 0.581   | -0.278    | 5e-05            | NA                    | Hypomethylated in FP vs FN |
| cg01165683 | 0.477   | 0.728   | -0.251    | 5e-05            | NA                    | Hypomethylated in FP vs FN |
| cg06765022 | 0.255   | 0.518   | -0.263    | 5e-05            | NA                    | Hypomethylated in FP vs FN |
| cg23330281 | 0.352   | 0.606   | -0.254    | 5e-05            | NAV2                  | Hypomethylated in FP vs FN |
| cg17431391 | 0.266   | 0.546   | -0.280    | 5e-05            | ZNF540                | Hypomethylated in FP vs FN |
| cg18239431 | 0.486   | 0.737   | -0.251    | 5e-05            | NA                    | Hypomethylated in FP vs FN |
| cg25856811 | 0.243   | 0.575   | -0.332    | 5e-05            | SPRR3                 | Hypomethylated in FP vs FN |
| cg15127250 | 0.275   | 0.586   | -0.311    | 5e-05            | GALNT6                | Hypomethylated in FP vs FN |
| cg21356630 | 0.487   | 0.760   | -0.273    | 5e-05            | NA                    | Hypomethylated in FP vs FN |
| cg23149852 | 0.440   | 0.726   | -0.286    | 5e-05            | NA                    | Hypomethylated in FP vs FN |



### Supplementary Table 7 (continued)

| Probe      | FP.mean | FN.mean | Mean.diff | Adjusted.P.value | Promoter.related.gene | Category                   |
|------------|---------|---------|-----------|------------------|-----------------------|----------------------------|
| cg01888395 | 0.421   | 0.687   | -0.266    | 5e-05            | NA                    | Hypomethylated in FP vs FN |
| cg20613432 | 0.258   | 0.560   | -0.302    | 5e-05            | NA                    | Hypomethylated in FP vs FN |
| cg23517999 | 0.365   | 0.640   | -0.275    | 5e-05            | NA                    | Hypomethylated in FP vs FN |
| cg05864326 | 0.244   | 0.653   | -0.410    | 5e-05            | NA                    | Hypomethylated in FP vs FN |
| cg04695513 | 0.374   | 0.689   | -0.315    | 5e-05            | NA                    | Hypomethylated in FP vs FN |
| cg08260052 | 0.367   | 0.665   | -0.298    | 5e-05            | NA                    | Hypomethylated in FP vs FN |
| cg26304689 | 0.305   | 0.565   | -0.261    | 5e-05            | NA                    | Hypomethylated in FP vs FN |
| cg05138148 | 0.430   | 0.745   | -0.315    | 5e-05            | NA                    | Hypomethylated in FP vs FN |
| cg10946333 | 0.450   | 0.730   | -0.280    | 5e-05            | P2RY14                | Hypomethylated in FP vs FN |
| cg02806715 | 0.302   | 0.556   | -0.254    | 5e-05            | NA                    | Hypomethylated in FP vs FN |
| cg16137928 | 0.240   | 0.525   | -0.285    | 5e-05            | NA                    | Hypomethylated in FP vs FN |
| cg01567173 | 0.246   | 0.614   | -0.368    | 5e-05            | NA                    | Hypomethylated in FP vs FN |
| cg04797061 | 0.390   | 0.689   | -0.300    | 5e-05            | NA                    | Hypomethylated in FP vs FN |
| cg02436004 | 0.234   | 0.546   | -0.312    | 5e-05            | NA                    | Hypomethylated in FP vs FN |
| cg20051292 | 0.222   | 0.594   | -0.371    | 5e-05            | RGS22                 | Hypomethylated in FP vs FN |
| cg17745211 | 0.138   | 0.431   | -0.293    | 5e-05            | NA                    | Hypomethylated in FP vs FN |
| cg19871235 | 0.295   | 0.580   | -0.286    | 5e-05            | TSPAN8                | Hypomethylated in FP vs FN |
| cg09765014 | 0.471   | 0.761   | -0.290    | 5e-05            | NA                    | Hypomethylated in FP vs FN |
| cg15440868 | 0.340   | 0.629   | -0.288    | 5e-05            | NA                    | Hypomethylated in FP vs FN |
| cg15594306 | 0.263   | 0.538   | -0.275    | 5e-05            | MOXD1                 | Hypomethylated in FP vs FN |
| cg17071045 | 0.265   | 0.592   | -0.328    | 5e-05            | NA                    | Hypomethylated in FP vs FN |
| cg01798157 | 0.324   | 0.630   | -0.307    | 5e-05            | NA                    | Hypomethylated in FP vs FN |
| cg04709736 | 0.519   | 0.782   | -0.263    | 5e-05            | PLVAP                 | Hypomethylated in FP vs FN |
| cg16196175 | 0.194   | 0.532   | -0.339    | 5e-05            | NA                    | Hypomethylated in FP vs FN |
| cg04157161 | 0.323   | 0.683   | -0.360    | 5e-05            | NA                    | Hypomethylated in FP vs FN |

### Supplementary Table 7 (continued)

| Probe      | FP.mean | FN.mean | Mean.diff | Adjusted.P.value | Promoter.related.gene | Category                   |
|------------|---------|---------|-----------|------------------|-----------------------|----------------------------|
| cg19509778 | 0.212   | 0.552   | -0.340    | 5e-05            | NA                    | Hypomethylated in FP vs FN |
| cg15142694 | 0.478   | 0.776   | -0.298    | 5e-05            | NA                    | Hypomethylated in FP vs FN |
| cg25615184 | 0.220   | 0.506   | -0.286    | 5e-05            | NA                    | Hypomethylated in FP vs FN |
| cg16827459 | 0.114   | 0.494   | -0.381    | 5e-05            | NA                    | Hypomethylated in FP vs FN |
| cg04201527 | 0.311   | 0.638   | -0.327    | 5e-05            | NA                    | Hypomethylated in FP vs FN |
| cg03677952 | 0.303   | 0.583   | -0.280    | 5e-05            | MLC1                  | Hypomethylated in FP vs FN |
| cg04255879 | 0.147   | 0.416   | -0.269    | 5e-05            | NA                    | Hypomethylated in FP vs FN |
| cg14898127 | 0.370   | 0.664   | -0.294    | 5e-05            | IL16                  | Hypomethylated in FP vs FN |
| cg18517540 | 0.466   | 0.761   | -0.295    | 5e-05            | NA                    | Hypomethylated in FP vs FN |
| cg08930112 | 0.499   | 0.758   | -0.259    | 5e-05            | NA                    | Hypomethylated in FP vs FN |
| cg04394267 | 0.203   | 0.475   | -0.271    | 5e-05            | NA                    | Hypomethylated in FP vs FN |
| cg14805996 | 0.213   | 0.600   | -0.387    | 5e-05            | NA                    | Hypomethylated in FP vs FN |
| cg25388861 | 0.409   | 0.678   | -0.269    | 5e-05            | NA                    | Hypomethylated in FP vs FN |
| cg02026062 | 0.121   | 0.450   | -0.328    | 5e-05            | NA                    | Hypomethylated in FP vs FN |
| cg09272923 | 0.408   | 0.700   | -0.292    | 5e-05            | NA                    | Hypomethylated in FP vs FN |
| cg02060465 | 0.240   | 0.547   | -0.307    | 5e-05            | SPRR4                 | Hypomethylated in FP vs FN |
| cg25691442 | 0.359   | 0.631   | -0.272    | 5e-05            | NA                    | Hypomethylated in FP vs FN |
| cg08989214 | 0.445   | 0.740   | -0.295    | 5e-05            | NA                    | Hypomethylated in FP vs FN |
| cg03592903 | 0.382   | 0.637   | -0.255    | 5e-05            | NA                    | Hypomethylated in FP vs FN |
| cg27131955 | 0.259   | 0.546   | -0.287    | 5e-05            | NA                    | Hypomethylated in FP vs FN |
| cg15295441 | 0.513   | 0.780   | -0.266    | 5e-05            | NA                    | Hypomethylated in FP vs FN |
| cg25307468 | 0.289   | 0.540   | -0.251    | 5e-05            | NA                    | Hypomethylated in FP vs FN |
| cg15302350 | 0.316   | 0.597   | -0.281    | 5e-05            | NA                    | Hypomethylated in FP vs FN |
| cg18533201 | 0.125   | 0.470   | -0.346    | 5e-05            | NA                    | Hypomethylated in FP vs FN |
| cg03169508 | 0.325   | 0.661   | -0.336    | 5e-05            | NA                    | Hypomethylated in FP vs FN |

### Supplementary Table 7 (continued)

| Probe      | FP.mean | FN.mean | Mean.diff | Adjusted.P.value | Promoter.related.gene | Category                   |
|------------|---------|---------|-----------|------------------|-----------------------|----------------------------|
| cg25363564 | 0.469   | 0.779   | -0.310    | 5e-05            | NA                    | Hypomethylated in FP vs FN |
| cg11586570 | 0.344   | 0.663   | -0.320    | 6e-05            | NA                    | Hypomethylated in FP vs FN |
| cg09829263 | 0.268   | 0.532   | -0.265    | 6e-05            | NA                    | Hypomethylated in FP vs FN |
| cg17743939 | 0.451   | 0.763   | -0.312    | 6e-05            | NA                    | Hypomethylated in FP vs FN |
| cg24624901 | 0.276   | 0.594   | -0.319    | 6e-05            | NA                    | Hypomethylated in FP vs FN |
| cg05893353 | 0.393   | 0.675   | -0.282    | 6e-05            | NA                    | Hypomethylated in FP vs FN |
| cg09120320 | 0.220   | 0.545   | -0.325    | 6e-05            | NA                    | Hypomethylated in FP vs FN |
| cg17544672 | 0.472   | 0.785   | -0.313    | 6e-05            | NA                    | Hypomethylated in FP vs FN |
| cg22892437 | 0.252   | 0.592   | -0.340    | 6e-05            | HPSE2                 | Hypomethylated in FP vs FN |
| cg11150807 | 0.321   | 0.599   | -0.278    | 6e-05            | NA                    | Hypomethylated in FP vs FN |
| cg24647015 | 0.419   | 0.688   | -0.269    | 6e-05            | NA                    | Hypomethylated in FP vs FN |
| cg18186771 | 0.373   | 0.700   | -0.326    | 6e-05            | NA                    | Hypomethylated in FP vs FN |
| cg24284497 | 0.173   | 0.429   | -0.256    | 6e-05            | NA                    | Hypomethylated in FP vs FN |
| cg12582654 | 0.233   | 0.523   | -0.290    | 6e-05            | KCP                   | Hypomethylated in FP vs FN |
| cg01249544 | 0.543   | 0.795   | -0.252    | 6e-05            | NA                    | Hypomethylated in FP vs FN |
| cg01256165 | 0.280   | 0.568   | -0.288    | 6e-05            | C20orf201             | Hypomethylated in FP vs FN |
| cg23548623 | 0.105   | 0.373   | -0.267    | 6e-05            | NA                    | Hypomethylated in FP vs FN |
| cg26856578 | 0.339   | 0.615   | -0.276    | 6e-05            | NA                    | Hypomethylated in FP vs FN |
| cg06809295 | 0.379   | 0.647   | -0.267    | 6e-05            | KCNQ1OT1              | Hypomethylated in FP vs FN |
| cg06891458 | 0.313   | 0.636   | -0.323    | 6e-05            | MGA                   | Hypomethylated in FP vs FN |
| cg06789686 | 0.385   | 0.650   | -0.265    | 6e-05            | NA                    | Hypomethylated in FP vs FN |
| cg13638420 | 0.273   | 0.672   | -0.399    | 6e-05            | NA                    | Hypomethylated in FP vs FN |
| cg00071241 | 0.440   | 0.788   | -0.348    | 6e-05            | NA                    | Hypomethylated in FP vs FN |
| cg13515584 | 0.231   | 0.504   | -0.273    | 6e-05            | NA                    | Hypomethylated in FP vs FN |
| cg04557057 | 0.329   | 0.688   | -0.359    | 6e-05            | NA                    | Hypomethylated in FP vs FN |

### Supplementary Table 7 (continued)

| Probe      | FP.mean | FN.mean | Mean.diff | Adjusted.P.value | Promoter.related.gene | Category                   |
|------------|---------|---------|-----------|------------------|-----------------------|----------------------------|
| cg00508158 | 0.513   | 0.794   | -0.281    | 6e-05            | NA                    | Hypomethylated in FP vs FN |
| cg20737382 | 0.491   | 0.800   | -0.309    | 6e-05            | NA                    | Hypomethylated in FP vs FN |
| cg18355311 | 0.536   | 0.797   | -0.261    | 6e-05            | NA                    | Hypomethylated in FP vs FN |
| cg10403171 | 0.393   | 0.681   | -0.288    | 6e-05            | NA                    | Hypomethylated in FP vs FN |
| cg09890339 | 0.456   | 0.741   | -0.286    | 6e-05            | NA                    | Hypomethylated in FP vs FN |
| cg21101743 | 0.214   | 0.551   | -0.337    | 6e-05            | NA                    | Hypomethylated in FP vs FN |
| cg21205855 | 0.286   | 0.591   | -0.305    | 6e-05            | NA                    | Hypomethylated in FP vs FN |
| cg06972911 | 0.444   | 0.723   | -0.278    | 6e-05            | FAM59A                | Hypomethylated in FP vs FN |
| cg06126421 | 0.229   | 0.512   | -0.283    | 6e-05            | NA                    | Hypomethylated in FP vs FN |
| cg21779088 | 0.476   | 0.750   | -0.274    | 6e-05            | NA                    | Hypomethylated in FP vs FN |
| cg14199150 | 0.358   | 0.655   | -0.297    | 6e-05            | NA                    | Hypomethylated in FP vs FN |
| cg06842071 | 0.384   | 0.710   | -0.326    | 6e-05            | NA                    | Hypomethylated in FP vs FN |
| cg24137774 | 0.233   | 0.567   | -0.334    | 6e-05            | NAV2                  | Hypomethylated in FP vs FN |
| cg18937395 | 0.143   | 0.479   | -0.336    | 6e-05            | SLITRK1               | Hypomethylated in FP vs FN |
| cg22448292 | 0.081   | 0.410   | -0.329    | 6e-05            | PEX11A_WDR93          | Hypomethylated in FP vs FN |
| cg19159365 | 0.382   | 0.708   | -0.327    | 6e-05            | NA                    | Hypomethylated in FP vs FN |
| cg14410395 | 0.138   | 0.471   | -0.333    | 6e-05            | NA                    | Hypomethylated in FP vs FN |
| cg11468255 | 0.444   | 0.697   | -0.253    | 6e-05            | NA                    | Hypomethylated in FP vs FN |
| cg25104637 | 0.295   | 0.554   | -0.259    | 6e-05            | NA                    | Hypomethylated in FP vs FN |
| cg00793181 | 0.410   | 0.672   | -0.262    | 6e-05            | KRT72                 | Hypomethylated in FP vs FN |
| cg04370442 | 0.261   | 0.593   | -0.332    | 6e-05            | NA                    | Hypomethylated in FP vs FN |
| cg05477514 | 0.186   | 0.484   | -0.298    | 6e-05            | NKX2-6                | Hypomethylated in FP vs FN |
| cg09234936 | 0.224   | 0.575   | -0.351    | 6e-05            | NA                    | Hypomethylated in FP vs FN |
| cg00743269 | 0.388   | 0.673   | -0.285    | 6e-05            | NA                    | Hypomethylated in FP vs FN |
| cg01937780 | 0.294   | 0.660   | -0.366    | 6e-05            | NA                    | Hypomethylated in FP vs FN |

### Supplementary Table 7 (continued)

| Probe      | FP.mean | FN.mean | Mean.diff | Adjusted.P.value | Promoter.related.gene | Category                   |
|------------|---------|---------|-----------|------------------|-----------------------|----------------------------|
| cg18351406 | 0.392   | 0.675   | -0.282    | 6e-05            | ANKRD56               | Hypomethylated in FP vs FN |
| cg27514336 | 0.327   | 0.588   | -0.261    | 6e-05            | NA                    | Hypomethylated in FP vs FN |
| cg02133070 | 0.408   | 0.704   | -0.296    | 6e-05            | NA                    | Hypomethylated in FP vs FN |
| cg04109822 | 0.191   | 0.448   | -0.257    | 6e-05            | NA                    | Hypomethylated in FP vs FN |
| cg03074026 | 0.301   | 0.643   | -0.341    | 6e-05            | NA                    | Hypomethylated in FP vs FN |
| cg17474422 | 0.417   | 0.702   | -0.285    | 6e-05            | NA                    | Hypomethylated in FP vs FN |
| cg11113216 | 0.458   | 0.770   | -0.312    | 6e-05            | NA                    | Hypomethylated in FP vs FN |
| cg05955210 | 0.411   | 0.702   | -0.291    | 6e-05            | NA                    | Hypomethylated in FP vs FN |
| cg06846669 | 0.093   | 0.355   | -0.262    | 6e-05            | NA                    | Hypomethylated in FP vs FN |
| cg16777618 | 0.368   | 0.685   | -0.317    | 6e-05            | NA                    | Hypomethylated in FP vs FN |
| cg14248598 | 0.461   | 0.725   | -0.264    | 6e-05            | NA                    | Hypomethylated in FP vs FN |
| cg06652210 | 0.291   | 0.559   | -0.268    | 6e-05            | OVCA2                 | Hypomethylated in FP vs FN |
| cg26455386 | 0.358   | 0.629   | -0.270    | 6e-05            | NA                    | Hypomethylated in FP vs FN |
| cg11449039 | 0.398   | 0.686   | -0.288    | 6e-05            | NA                    | Hypomethylated in FP vs FN |
| cg03998173 | 0.186   | 0.590   | -0.404    | 6e-05            | RHEB                  | Hypomethylated in FP vs FN |
| cg07788369 | 0.320   | 0.615   | -0.296    | 6e-05            | NA                    | Hypomethylated in FP vs FN |
| cg12284789 | 0.366   | 0.711   | -0.345    | 6e-05            | NA                    | Hypomethylated in FP vs FN |
| cg00966099 | 0.165   | 0.527   | -0.362    | 6e-05            | NA                    | Hypomethylated in FP vs FN |
| cg07653395 | 0.412   | 0.699   | -0.286    | 6e-05            | NA                    | Hypomethylated in FP vs FN |
| cg00338702 | 0.205   | 0.525   | -0.320    | 6e-05            | NA                    | Hypomethylated in FP vs FN |
| cg01212326 | 0.405   | 0.693   | -0.287    | 6e-05            | POU2AF1               | Hypomethylated in FP vs FN |
| cg22583148 | 0.385   | 0.714   | -0.329    | 6e-05            | NA                    | Hypomethylated in FP vs FN |
| cg11931762 | 0.256   | 0.540   | -0.285    | 6e-05            | NA                    | Hypomethylated in FP vs FN |
| cg12994591 | 0.358   | 0.647   | -0.289    | 6e-05            | NA                    | Hypomethylated in FP vs FN |
| cg27067158 | 0.445   | 0.723   | -0.278    | 6e-05            | NA                    | Hypomethylated in FP vs FN |

### Supplementary Table 7 (continued)

| Probe      | FP.mean | FN.mean | Mean.diff | Adjusted.P.value | Promoter.related.gene | Category                   |
|------------|---------|---------|-----------|------------------|-----------------------|----------------------------|
| cg23547892 | 0.294   | 0.549   | -0.255    | 6e-05            | NA                    | Hypomethylated in FP vs FN |
| cg02551745 | 0.469   | 0.730   | -0.261    | 6e-05            | NA                    | Hypomethylated in FP vs FN |
| cg13187539 | 0.356   | 0.642   | -0.287    | 6e-05            | TRPM1                 | Hypomethylated in FP vs FN |
| cg17546649 | 0.196   | 0.474   | -0.277    | 6e-05            | KIF15                 | Hypomethylated in FP vs FN |
| cg16879574 | 0.250   | 0.581   | -0.330    | 6e-05            | NHLRC1                | Hypomethylated in FP vs FN |
| cg02441618 | 0.237   | 0.517   | -0.279    | 6e-05            | NA                    | Hypomethylated in FP vs FN |
| cg10832108 | 0.234   | 0.553   | -0.319    | 6e-05            | NEUROG1               | Hypomethylated in FP vs FN |
| cg12477370 | 0.200   | 0.506   | -0.306    | 6e-05            | NA                    | Hypomethylated in FP vs FN |
| cg11231958 | 0.342   | 0.626   | -0.283    | 6e-05            | NA                    | Hypomethylated in FP vs FN |
| cg15820062 | 0.136   | 0.485   | -0.350    | 6e-05            | NA                    | Hypomethylated in FP vs FN |
| cg07053162 | 0.369   | 0.651   | -0.282    | 6e-05            | NA                    | Hypomethylated in FP vs FN |
| cg20038187 | 0.383   | 0.692   | -0.309    | 6e-05            | NA                    | Hypomethylated in FP vs FN |
| cg01152897 | 0.356   | 0.643   | -0.287    | 6e-05            | NA                    | Hypomethylated in FP vs FN |
| cg11946503 | 0.194   | 0.525   | -0.331    | 6e-05            | NEUROG1               | Hypomethylated in FP vs FN |
| cg25389463 | 0.314   | 0.569   | -0.255    | 6e-05            | RBM34                 | Hypomethylated in FP vs FN |
| cg24990400 | 0.359   | 0.651   | -0.292    | 6e-05            | NA                    | Hypomethylated in FP vs FN |
| cg13850606 | 0.203   | 0.594   | -0.391    | 6e-05            | NA                    | Hypomethylated in FP vs FN |
| cg25950625 | 0.175   | 0.504   | -0.330    | 6e-05            | NA                    | Hypomethylated in FP vs FN |
| cg07135042 | 0.224   | 0.496   | -0.272    | 6e-05            | ZNF582                | Hypomethylated in FP vs FN |
| cg22667178 | 0.097   | 0.457   | -0.360    | 6e-05            | SERP2                 | Hypomethylated in FP vs FN |
| cg12804677 | 0.346   | 0.653   | -0.307    | 6e-05            | NA                    | Hypomethylated in FP vs FN |
| cg18147048 | 0.343   | 0.678   | -0.336    | 6e-05            | TIMM13                | Hypomethylated in FP vs FN |
| cg26055488 | 0.370   | 0.627   | -0.257    | 6e-05            | NA                    | Hypomethylated in FP vs FN |
| cg00029246 | 0.406   | 0.715   | -0.309    | 6e-05            | NA                    | Hypomethylated in FP vs FN |
| cg11417701 | 0.341   | 0.639   | -0.298    | 6e-05            | NA                    | Hypomethylated in FP vs FN |

### Supplementary Table 7 (continued)

| Probe      | FP.mean | FN.mean | Mean.diff | Adjusted.P.value | Promoter.related.gene | Category                   |
|------------|---------|---------|-----------|------------------|-----------------------|----------------------------|
| cg08633249 | 0.333   | 0.603   | -0.270    | 6e-05            | NA                    | Hypomethylated in FP vs FN |
| cg20047489 | 0.539   | 0.793   | -0.254    | 6e-05            | NA                    | Hypomethylated in FP vs FN |
| cg11566131 | 0.436   | 0.711   | -0.275    | 6e-05            | NA                    | Hypomethylated in FP vs FN |
| cg03890691 | 0.168   | 0.544   | -0.376    | 6e-05            | DOC2A                 | Hypomethylated in FP vs FN |
| cg10241675 | 0.391   | 0.644   | -0.254    | 6e-05            | NA                    | Hypomethylated in FP vs FN |
| cg12494515 | 0.356   | 0.610   | -0.254    | 6e-05            | NA                    | Hypomethylated in FP vs FN |
| cg00713400 | 0.340   | 0.726   | -0.386    | 6e-05            | NA                    | Hypomethylated in FP vs FN |
| cg00305874 | 0.339   | 0.602   | -0.263    | 6e-05            | NA                    | Hypomethylated in FP vs FN |
| cg09318375 | 0.152   | 0.471   | -0.319    | 6e-05            | TCTEX1D1              | Hypomethylated in FP vs FN |
| cg01809895 | 0.266   | 0.587   | -0.320    | 6e-05            | NA                    | Hypomethylated in FP vs FN |
| cg00360414 | 0.237   | 0.558   | -0.321    | 6e-05            | TMEM26                | Hypomethylated in FP vs FN |
| cg05767720 | 0.508   | 0.796   | -0.288    | 6e-05            | NA                    | Hypomethylated in FP vs FN |
| cg26549601 | 0.470   | 0.724   | -0.254    | 6e-05            | NA                    | Hypomethylated in FP vs FN |
| cg12634591 | 0.365   | 0.706   | -0.341    | 6e-05            | HOXD3                 | Hypomethylated in FP vs FN |
| cg13445249 | 0.379   | 0.665   | -0.285    | 6e-05            | NA                    | Hypomethylated in FP vs FN |
| cg13644317 | 0.220   | 0.596   | -0.377    | 6e-05            | NA                    | Hypomethylated in FP vs FN |
| cg17065850 | 0.440   | 0.724   | -0.284    | 6e-05            | NA                    | Hypomethylated in FP vs FN |
| cg01357233 | 0.455   | 0.729   | -0.274    | 6e-05            | LRRC18                | Hypomethylated in FP vs FN |
| cg26400830 | 0.106   | 0.467   | -0.362    | 6e-05            | NA                    | Hypomethylated in FP vs FN |
| cg10862399 | 0.298   | 0.561   | -0.263    | 6e-05            | NA                    | Hypomethylated in FP vs FN |
| cg19848629 | 0.290   | 0.604   | -0.314    | 6e-05            | NA                    | Hypomethylated in FP vs FN |
| cg18362330 | 0.390   | 0.646   | -0.256    | 6e-05            | NEUROG1               | Hypomethylated in FP vs FN |
| cg12717203 | 0.128   | 0.477   | -0.349    | 6e-05            | NA                    | Hypomethylated in FP vs FN |
| cg01808739 | 0.254   | 0.551   | -0.297    | 6e-05            | FNBP1L                | Hypomethylated in FP vs FN |
| cg04206257 | 0.347   | 0.604   | -0.256    | 6e-05            | NA                    | Hypomethylated in FP vs FN |

### Supplementary Table 7 (continued)

| Probe      | FP.mean | FN.mean | Mean.diff | Adjusted.P.value | Promoter.related.gene | Category                   |
|------------|---------|---------|-----------|------------------|-----------------------|----------------------------|
| cg17789138 | 0.220   | 0.519   | -0.299    | 6e-05            | NA                    | Hypomethylated in FP vs FN |
| cg23950157 | 0.227   | 0.492   | -0.265    | 6e-05            | NA                    | Hypomethylated in FP vs FN |
| cg00172803 | 0.448   | 0.738   | -0.290    | 6e-05            | SLC38A8               | Hypomethylated in FP vs FN |
| cg13678428 | 0.470   | 0.743   | -0.273    | 6e-05            | NA                    | Hypomethylated in FP vs FN |
| cg15939287 | 0.286   | 0.622   | -0.336    | 6e-05            | NA                    | Hypomethylated in FP vs FN |
| cg09128567 | 0.315   | 0.746   | -0.432    | 6e-05            | NA                    | Hypomethylated in FP vs FN |
| cg17017591 | 0.382   | 0.687   | -0.304    | 6e-05            | NA                    | Hypomethylated in FP vs FN |
| cg04820362 | 0.327   | 0.582   | -0.255    | 6e-05            | LRRC43                | Hypomethylated in FP vs FN |
| cg22241124 | 0.442   | 0.715   | -0.273    | 6e-05            | NA                    | Hypomethylated in FP vs FN |
| cg22439922 | 0.320   | 0.587   | -0.267    | 7e-05            | NA                    | Hypomethylated in FP vs FN |
| cg21428681 | 0.229   | 0.517   | -0.288    | 7e-05            | NKX3-1                | Hypomethylated in FP vs FN |
| cg01565438 | 0.375   | 0.657   | -0.283    | 7e-05            | SLFN13                | Hypomethylated in FP vs FN |
| cg23338195 | 0.333   | 0.631   | -0.298    | 7e-05            | SLC30A8               | Hypomethylated in FP vs FN |
| cg08590257 | 0.474   | 0.765   | -0.291    | 7e-05            | NA                    | Hypomethylated in FP vs FN |
| cg23109721 | 0.170   | 0.502   | -0.332    | 7e-05            | NA                    | Hypomethylated in FP vs FN |
| cg00772000 | 0.193   | 0.526   | -0.333    | 7e-05            | NHLRC1                | Hypomethylated in FP vs FN |
| cg16774479 | 0.396   | 0.690   | -0.294    | 7e-05            | NA                    | Hypomethylated in FP vs FN |
| cg01092108 | 0.274   | 0.526   | -0.252    | 7e-05            | NA                    | Hypomethylated in FP vs FN |
| cg04267526 | 0.171   | 0.455   | -0.285    | 7e-05            | NA                    | Hypomethylated in FP vs FN |
| cg24780883 | 0.401   | 0.697   | -0.297    | 7e-05            | NA                    | Hypomethylated in FP vs FN |
| cg15433297 | 0.204   | 0.477   | -0.274    | 7e-05            | PKHD1L1               | Hypomethylated in FP vs FN |
| cg03562044 | 0.276   | 0.709   | -0.433    | 7e-05            | NA                    | Hypomethylated in FP vs FN |
| cg07124687 | 0.486   | 0.812   | -0.326    | 7e-05            | NA                    | Hypomethylated in FP vs FN |
| cg02870147 | 0.539   | 0.806   | -0.268    | 7e-05            | NA                    | Hypomethylated in FP vs FN |
| cg14325153 | 0.552   | 0.809   | -0.256    | 7e-05            | PRR23C                | Hypomethylated in FP vs FN |



### Supplementary Table 7 (continued)

| Probe      | FP.mean | FN.mean | Mean.diff | Adjusted.P.value | Promoter.related.gene | Category                   |
|------------|---------|---------|-----------|------------------|-----------------------|----------------------------|
| cg13614409 | 0.150   | 0.534   | -0.384    | 7e-05            | C13orf26              | Hypomethylated in FP vs FN |
| cg01146063 | 0.266   | 0.590   | -0.323    | 7e-05            | NA                    | Hypomethylated in FP vs FN |
| cg00831126 | 0.296   | 0.608   | -0.312    | 7e-05            | NA                    | Hypomethylated in FP vs FN |
| cg02495823 | 0.157   | 0.523   | -0.367    | 7e-05            | NA                    | Hypomethylated in FP vs FN |
| cg03065175 | 0.285   | 0.622   | -0.337    | 7e-05            | NA                    | Hypomethylated in FP vs FN |
| cg08416650 | 0.089   | 0.427   | -0.338    | 7e-05            | LPCAT2                | Hypomethylated in FP vs FN |
| cg04430835 | 0.107   | 0.452   | -0.345    | 7e-05            | SPATA18               | Hypomethylated in FP vs FN |
| cg09173348 | 0.350   | 0.634   | -0.284    | 7e-05            | ARL5C                 | Hypomethylated in FP vs FN |
| cg22900415 | 0.193   | 0.558   | -0.364    | 7e-05            | GJA3                  | Hypomethylated in FP vs FN |
| cg04312620 | 0.318   | 0.647   | -0.330    | 7e-05            | SALL4                 | Hypomethylated in FP vs FN |
| cg26352652 | 0.356   | 0.637   | -0.281    | 7e-05            | NA                    | Hypomethylated in FP vs FN |
| cg13839439 | 0.388   | 0.649   | -0.261    | 7e-05            | NA                    | Hypomethylated in FP vs FN |
| cg05756029 | 0.522   | 0.781   | -0.260    | 7e-05            | LOC494141             | Hypomethylated in FP vs FN |
| cg14621053 | 0.071   | 0.337   | -0.266    | 7e-05            | ADAM12                | Hypomethylated in FP vs FN |
| cg09077443 | 0.406   | 0.693   | -0.286    | 7e-05            | NA                    | Hypomethylated in FP vs FN |
| cg01715450 | 0.398   | 0.654   | -0.257    | 7e-05            | NA                    | Hypomethylated in FP vs FN |
| cg15082473 | 0.445   | 0.712   | -0.268    | 7e-05            | NA                    | Hypomethylated in FP vs FN |
| cg19578835 | 0.114   | 0.521   | -0.407    | 7e-05            | NA                    | Hypomethylated in FP vs FN |
| cg10904109 | 0.256   | 0.561   | -0.306    | 7e-05            | NA                    | Hypomethylated in FP vs FN |
| cg13685314 | 0.249   | 0.510   | -0.261    | 7e-05            | DBC1                  | Hypomethylated in FP vs FN |
| cg24602417 | 0.423   | 0.732   | -0.308    | 7e-05            | NA                    | Hypomethylated in FP vs FN |
| cg20863282 | 0.422   | 0.682   | -0.260    | 7e-05            | NA                    | Hypomethylated in FP vs FN |
| cg09257677 | 0.257   | 0.558   | -0.301    | 7e-05            | NA                    | Hypomethylated in FP vs FN |
| cg11107212 | 0.334   | 0.660   | -0.325    | 7e-05            | NA                    | Hypomethylated in FP vs FN |
| cg00616243 | 0.100   | 0.409   | -0.309    | 7e-05            | NA                    | Hypomethylated in FP vs FN |

### Supplementary Table 7 (continued)

| Probe      | FP.mean | FN.mean | Mean.diff | Adjusted.P.value | Promoter.related.gene | Category                   |
|------------|---------|---------|-----------|------------------|-----------------------|----------------------------|
| cg00402417 | 0.226   | 0.505   | -0.278    | 7e-05            | NA                    | Hypomethylated in FP vs FN |
| cg06530338 | 0.372   | 0.752   | -0.380    | 7e-05            | NA                    | Hypomethylated in FP vs FN |
| cg21469772 | 0.375   | 0.658   | -0.283    | 7e-05            | NA                    | Hypomethylated in FP vs FN |
| cg06412777 | 0.342   | 0.649   | -0.306    | 7e-05            | NA                    | Hypomethylated in FP vs FN |
| cg01967055 | 0.145   | 0.397   | -0.252    | 7e-05            | HRASLS5               | Hypomethylated in FP vs FN |
| cg24828648 | 0.296   | 0.621   | -0.325    | 7e-05            | NA                    | Hypomethylated in FP vs FN |
| cg02470267 | 0.433   | 0.709   | -0.276    | 7e-05            | NA                    | Hypomethylated in FP vs FN |
| cg27084026 | 0.115   | 0.386   | -0.272    | 7e-05            | CHFR                  | Hypomethylated in FP vs FN |
| cg25370412 | 0.412   | 0.725   | -0.313    | 7e-05            | NA                    | Hypomethylated in FP vs FN |
| cg07762347 | 0.396   | 0.651   | -0.255    | 7e-05            | NA                    | Hypomethylated in FP vs FN |
| cg20117447 | 0.513   | 0.793   | -0.280    | 7e-05            | NA                    | Hypomethylated in FP vs FN |
| cg19471040 | 0.369   | 0.636   | -0.267    | 7e-05            | NA                    | Hypomethylated in FP vs FN |
| cg14038391 | 0.267   | 0.685   | -0.418    | 7e-05            | NA                    | Hypomethylated in FP vs FN |
| cg07525782 | 0.309   | 0.626   | -0.318    | 7e-05            | NA                    | Hypomethylated in FP vs FN |
| cg17116120 | 0.285   | 0.612   | -0.327    | 7e-05            | COX4I2                | Hypomethylated in FP vs FN |
| cg00947796 | 0.373   | 0.650   | -0.277    | 7e-05            | NA                    | Hypomethylated in FP vs FN |
| cg06310131 | 0.236   | 0.562   | -0.325    | 7e-05            | NA                    | Hypomethylated in FP vs FN |
| cg09793988 | 0.092   | 0.455   | -0.363    | 7e-05            | LPCAT2                | Hypomethylated in FP vs FN |
| cg22130008 | 0.230   | 0.497   | -0.267    | 7e-05            | NA                    | Hypomethylated in FP vs FN |
| cg06161630 | 0.530   | 0.816   | -0.286    | 7e-05            | EPHA1                 | Hypomethylated in FP vs FN |
| cg01537445 | 0.398   | 0.695   | -0.296    | 7e-05            | NA                    | Hypomethylated in FP vs FN |
| cg24145020 | 0.390   | 0.694   | -0.304    | 7e-05            | INSL5                 | Hypomethylated in FP vs FN |
| cg08772837 | 0.331   | 0.588   | -0.257    | 7e-05            | PCDHAC2               | Hypomethylated in FP vs FN |
| cg20640862 | 0.379   | 0.676   | -0.297    | 7e-05            | NA                    | Hypomethylated in FP vs FN |
| cg06857289 | 0.215   | 0.546   | -0.331    | 7e-05            | NA                    | Hypomethylated in FP vs FN |

### Supplementary Table 7 (continued)

| Probe      | FP.mean | FN.mean | Mean.diff | Adjusted.P.value | Promoter.related.gene | Category                   |
|------------|---------|---------|-----------|------------------|-----------------------|----------------------------|
| cg01538605 | 0.369   | 0.656   | -0.286    | 7e-05            | NA                    | Hypomethylated in FP vs FN |
| cg00426976 | 0.411   | 0.676   | -0.265    | 7e-05            | NA                    | Hypomethylated in FP vs FN |
| cg12822074 | 0.090   | 0.465   | -0.375    | 7e-05            | NA                    | Hypomethylated in FP vs FN |
| cg23044178 | 0.558   | 0.823   | -0.264    | 7e-05            | NA                    | Hypomethylated in FP vs FN |
| cg15900979 | 0.192   | 0.459   | -0.266    | 7e-05            | RAB19                 | Hypomethylated in FP vs FN |
| cg08003887 | 0.368   | 0.663   | -0.295    | 7e-05            | NA                    | Hypomethylated in FP vs FN |
| cg12439439 | 0.109   | 0.458   | -0.350    | 7e-05            | NA                    | Hypomethylated in FP vs FN |
| cg20643991 | 0.311   | 0.588   | -0.277    | 7e-05            | NA                    | Hypomethylated in FP vs FN |
| cg14709292 | 0.261   | 0.596   | -0.335    | 7e-05            | NA                    | Hypomethylated in FP vs FN |
| cg18560638 | 0.512   | 0.785   | -0.273    | 7e-05            | MIR623                | Hypomethylated in FP vs FN |
| cg12201625 | 0.508   | 0.776   | -0.269    | 7e-05            | NA                    | Hypomethylated in FP vs FN |
| cg06708237 | 0.471   | 0.761   | -0.289    | 7e-05            | NA                    | Hypomethylated in FP vs FN |
| cg21588562 | 0.589   | 0.864   | -0.275    | 7e-05            | FTMT                  | Hypomethylated in FP vs FN |
| cg21997986 | 0.384   | 0.654   | -0.270    | 7e-05            | NA                    | Hypomethylated in FP vs FN |
| cg08957484 | 0.300   | 0.616   | -0.315    | 7e-05            | CCNI2                 | Hypomethylated in FP vs FN |
| cg07737644 | 0.370   | 0.657   | -0.288    | 7e-05            | NA                    | Hypomethylated in FP vs FN |
| cg17249452 | 0.370   | 0.695   | -0.325    | 7e-05            | NA                    | Hypomethylated in FP vs FN |
| cg16650901 | 0.236   | 0.592   | -0.356    | 7e-05            | NA                    | Hypomethylated in FP vs FN |
| cg03342215 | 0.523   | 0.793   | -0.270    | 7e-05            | NA                    | Hypomethylated in FP vs FN |
| cg10932874 | 0.343   | 0.604   | -0.261    | 7e-05            | AGAP2                 | Hypomethylated in FP vs FN |
| cg05590982 | 0.308   | 0.562   | -0.253    | 7e-05            | NUPR1                 | Hypomethylated in FP vs FN |
| cg16562275 | 0.233   | 0.591   | -0.358    | 7e-05            | NA                    | Hypomethylated in FP vs FN |
| cg08364970 | 0.404   | 0.732   | -0.327    | 7e-05            | NA                    | Hypomethylated in FP vs FN |
| cg18388552 | 0.104   | 0.408   | -0.305    | 7e-05            | NA                    | Hypomethylated in FP vs FN |
| cg08845685 | 0.493   | 0.775   | -0.282    | 7e-05            | NA                    | Hypomethylated in FP vs FN |

### Supplementary Table 7 (continued)

| Probe      | FP.mean | FN.mean | Mean.diff | Adjusted.P.value | Promoter.related.gene | Category                   |
|------------|---------|---------|-----------|------------------|-----------------------|----------------------------|
| cg23415373 | 0.567   | 0.827   | -0.260    | 7e-05            | NA                    | Hypomethylated in FP vs FN |
| cg14312965 | 0.475   | 0.729   | -0.254    | 8e-05            | ACTL7B                | Hypomethylated in FP vs FN |
| cg19305681 | 0.204   | 0.541   | -0.336    | 8e-05            | NA                    | Hypomethylated in FP vs FN |
| cg14538320 | 0.157   | 0.408   | -0.251    | 8e-05            | NA                    | Hypomethylated in FP vs FN |
| cg16713551 | 0.256   | 0.519   | -0.263    | 8e-05            | NA                    | Hypomethylated in FP vs FN |
| cg09027255 | 0.393   | 0.664   | -0.271    | 8e-05            | NA                    | Hypomethylated in FP vs FN |
| cg22956205 | 0.463   | 0.769   | -0.306    | 8e-05            | NA                    | Hypomethylated in FP vs FN |
| cg02095401 | 0.384   | 0.668   | -0.284    | 8e-05            | NA                    | Hypomethylated in FP vs FN |
| cg01247693 | 0.347   | 0.671   | -0.324    | 8e-05            | NA                    | Hypomethylated in FP vs FN |
| cg26019584 | 0.293   | 0.607   | -0.314    | 8e-05            | NA                    | Hypomethylated in FP vs FN |
| cg12700449 | 0.222   | 0.506   | -0.284    | 8e-05            | NA                    | Hypomethylated in FP vs FN |
| cg02822745 | 0.525   | 0.784   | -0.259    | 8e-05            | NA                    | Hypomethylated in FP vs FN |
| cg10508760 | 0.287   | 0.650   | -0.363    | 8e-05            | NA                    | Hypomethylated in FP vs FN |
| cg20428976 | 0.365   | 0.653   | -0.288    | 8e-05            | NA                    | Hypomethylated in FP vs FN |
| cg19430577 | 0.174   | 0.519   | -0.345    | 8e-05            | STEAP4                | Hypomethylated in FP vs FN |
| cg22586653 | 0.142   | 0.455   | -0.313    | 8e-05            | NA                    | Hypomethylated in FP vs FN |
| cg17771150 | 0.477   | 0.747   | -0.271    | 8e-05            | NA                    | Hypomethylated in FP vs FN |
| cg08832695 | 0.306   | 0.591   | -0.285    | 8e-05            | NA                    | Hypomethylated in FP vs FN |
| cg13345942 | 0.312   | 0.650   | -0.339    | 8e-05            | NA                    | Hypomethylated in FP vs FN |
| cg03490759 | 0.513   | 0.796   | -0.283    | 8e-05            | NA                    | Hypomethylated in FP vs FN |
| cg03182958 | 0.242   | 0.527   | -0.285    | 8e-05            | SGPP2                 | Hypomethylated in FP vs FN |
| cg24094450 | 0.408   | 0.687   | -0.279    | 8e-05            | NA                    | Hypomethylated in FP vs FN |
| cg18463607 | 0.412   | 0.663   | -0.251    | 8e-05            | EXOC1                 | Hypomethylated in FP vs FN |
| cg18936814 | 0.581   | 0.845   | -0.264    | 8e-05            | NA                    | Hypomethylated in FP vs FN |
| cg05563287 | 0.259   | 0.519   | -0.260    | 8e-05            | NA                    | Hypomethylated in FP vs FN |

### Supplementary Table 7 (continued)

| Probe      | FP.mean | FN.mean | Mean.diff | Adjusted.P.value | Promoter.related.gene | Category                   |
|------------|---------|---------|-----------|------------------|-----------------------|----------------------------|
| cg16490778 | 0.501   | 0.819   | -0.318    | 8e-05            | NA                    | Hypomethylated in FP vs FN |
| cg18351607 | 0.205   | 0.508   | -0.303    | 8e-05            | PSTK                  | Hypomethylated in FP vs FN |
| cg03303633 | 0.469   | 0.766   | -0.297    | 8e-05            | NA                    | Hypomethylated in FP vs FN |
| cg26656258 | 0.305   | 0.614   | -0.309    | 8e-05            | NA                    | Hypomethylated in FP vs FN |
| cg07161146 | 0.241   | 0.539   | -0.298    | 8e-05            | NA                    | Hypomethylated in FP vs FN |
| cg09804711 | 0.613   | 0.869   | -0.255    | 8e-05            | NA                    | Hypomethylated in FP vs FN |
| cg08806578 | 0.528   | 0.824   | -0.296    | 8e-05            | NA                    | Hypomethylated in FP vs FN |
| cg17485530 | 0.425   | 0.713   | -0.288    | 8e-05            | LBP                   | Hypomethylated in FP vs FN |
| cg22510074 | 0.289   | 0.546   | -0.257    | 8e-05            | CALN1                 | Hypomethylated in FP vs FN |
| cg03213775 | 0.310   | 0.587   | -0.277    | 8e-05            | NA                    | Hypomethylated in FP vs FN |
| cg25061289 | 0.468   | 0.753   | -0.285    | 8e-05            | NDN                   | Hypomethylated in FP vs FN |
| cg14564076 | 0.189   | 0.562   | -0.373    | 8e-05            | NA                    | Hypomethylated in FP vs FN |
| cg01664929 | 0.376   | 0.639   | -0.263    | 8e-05            | NA                    | Hypomethylated in FP vs FN |
| cg06365303 | 0.265   | 0.547   | -0.282    | 8e-05            | NA                    | Hypomethylated in FP vs FN |
| cg21910416 | 0.458   | 0.723   | -0.266    | 8e-05            | NA                    | Hypomethylated in FP vs FN |
| cg04774597 | 0.353   | 0.676   | -0.324    | 8e-05            | RPLP1                 | Hypomethylated in FP vs FN |
| cg02997983 | 0.288   | 0.665   | -0.377    | 8e-05            | NA                    | Hypomethylated in FP vs FN |
| cg10804687 | 0.385   | 0.675   | -0.291    | 8e-05            | NA                    | Hypomethylated in FP vs FN |
| cg24496666 | 0.106   | 0.396   | -0.290    | 8e-05            | GIPC2                 | Hypomethylated in FP vs FN |
| cg16404106 | 0.432   | 0.710   | -0.278    | 8e-05            | CCDC81                | Hypomethylated in FP vs FN |
| cg11912330 | 0.049   | 0.392   | -0.343    | 8e-05            | PCP4L1                | Hypomethylated in FP vs FN |
| cg06145336 | 0.442   | 0.764   | -0.323    | 8e-05            | HOXD3                 | Hypomethylated in FP vs FN |
| cg00905419 | 0.559   | 0.828   | -0.269    | 8e-05            | NA                    | Hypomethylated in FP vs FN |
| cg14621254 | 0.562   | 0.827   | -0.265    | 8e-05            | NA                    | Hypomethylated in FP vs FN |
| cg10979436 | 0.200   | 0.576   | -0.376    | 8e-05            | NA                    | Hypomethylated in FP vs FN |

### Supplementary Table 7 (continued)

| Probe      | FP.mean | FN.mean | Mean.diff | Adjusted.P.value | Promoter.related.gene | Category                   |
|------------|---------|---------|-----------|------------------|-----------------------|----------------------------|
| cg13786236 | 0.551   | 0.844   | -0.293    | 8e-05            | NA                    | Hypomethylated in FP vs FN |
| cg27084903 | 0.126   | 0.463   | -0.336    | 8e-05            | PTEN_KILLIN           | Hypomethylated in FP vs FN |
| cg01917657 | 0.298   | 0.571   | -0.273    | 8e-05            | NA                    | Hypomethylated in FP vs FN |
| cg04196068 | 0.435   | 0.777   | -0.342    | 8e-05            | NA                    | Hypomethylated in FP vs FN |
| cg14614094 | 0.575   | 0.849   | -0.275    | 8e-05            | EXOSC2                | Hypomethylated in FP vs FN |
| cg00681462 | 0.335   | 0.701   | -0.366    | 8e-05            | NA                    | Hypomethylated in FP vs FN |
| cg03267697 | 0.465   | 0.760   | -0.295    | 8e-05            | GMPPA                 | Hypomethylated in FP vs FN |
| cg13211302 | 0.399   | 0.693   | -0.294    | 8e-05            | NA                    | Hypomethylated in FP vs FN |
| cg13044675 | 0.267   | 0.670   | -0.402    | 8e-05            | NA                    | Hypomethylated in FP vs FN |
| cg23570694 | 0.309   | 0.590   | -0.281    | 8e-05            | NA                    | Hypomethylated in FP vs FN |
| cg09648809 | 0.575   | 0.827   | -0.252    | 8e-05            | NA                    | Hypomethylated in FP vs FN |
| cg18783792 | 0.313   | 0.579   | -0.267    | 8e-05            | NA                    | Hypomethylated in FP vs FN |
| cg00348222 | 0.417   | 0.707   | -0.291    | 8e-05            | NA                    | Hypomethylated in FP vs FN |
| cg25570495 | 0.379   | 0.676   | -0.297    | 8e-05            | SALL4                 | Hypomethylated in FP vs FN |
| cg18306861 | 0.236   | 0.544   | -0.308    | 8e-05            | PLEK2                 | Hypomethylated in FP vs FN |
| cg23014487 | 0.264   | 0.534   | -0.270    | 8e-05            | NA                    | Hypomethylated in FP vs FN |
| cg15450295 | 0.229   | 0.611   | -0.382    | 8e-05            | NA                    | Hypomethylated in FP vs FN |
| cg06334737 | 0.427   | 0.733   | -0.306    | 8e-05            | SCGB2A1               | Hypomethylated in FP vs FN |
| cg01217815 | 0.319   | 0.615   | -0.296    | 8e-05            | NA                    | Hypomethylated in FP vs FN |
| cg03124146 | 0.277   | 0.620   | -0.343    | 8e-05            | NA                    | Hypomethylated in FP vs FN |
| cg15152595 | 0.327   | 0.648   | -0.321    | 8e-05            | NA                    | Hypomethylated in FP vs FN |
| cg00949753 | 0.234   | 0.539   | -0.305    | 8e-05            | NA                    | Hypomethylated in FP vs FN |
| cg10092108 | 0.398   | 0.680   | -0.282    | 8e-05            | NA                    | Hypomethylated in FP vs FN |
| cg20726993 | 0.450   | 0.715   | -0.265    | 8e-05            | NA                    | Hypomethylated in FP vs FN |
| cg00254681 | 0.403   | 0.732   | -0.328    | 8e-05            | NA                    | Hypomethylated in FP vs FN |

### Supplementary Table 7 (continued)

| Probe      | FP.mean | FN.mean | Mean.diff | Adjusted.P.value | Promoter.related.gene | Category                   |
|------------|---------|---------|-----------|------------------|-----------------------|----------------------------|
| cg18614735 | 0.303   | 0.601   | -0.298    | 8e-05            | NA                    | Hypomethylated in FP vs FN |
| cg01152019 | 0.402   | 0.704   | -0.302    | 8e-05            | HOXD4                 | Hypomethylated in FP vs FN |
| cg18049228 | 0.241   | 0.514   | -0.274    | 8e-05            | NA                    | Hypomethylated in FP vs FN |
| cg25271892 | 0.199   | 0.449   | -0.251    | 8e-05            | CHRM1                 | Hypomethylated in FP vs FN |
| cg09044186 | 0.618   | 0.871   | -0.254    | 8e-05            | NA                    | Hypomethylated in FP vs FN |
| cg13969584 | 0.255   | 0.604   | -0.349    | 8e-05            | AFG3L1_CENPBD1        | Hypomethylated in FP vs FN |
| cg27498434 | 0.286   | 0.538   | -0.252    | 8e-05            | NA                    | Hypomethylated in FP vs FN |
| cg21864868 | 0.422   | 0.694   | -0.271    | 8e-05            | LOC404266             | Hypomethylated in FP vs FN |
| cg20798249 | 0.242   | 0.584   | -0.343    | 8e-05            | MLNR                  | Hypomethylated in FP vs FN |
| cg02532824 | 0.157   | 0.416   | -0.259    | 8e-05            | NA                    | Hypomethylated in FP vs FN |
| cg09427605 | 0.374   | 0.707   | -0.333    | 8e-05            | NA                    | Hypomethylated in FP vs FN |
| cg00463848 | 0.415   | 0.703   | -0.288    | 8e-05            | KRT2                  | Hypomethylated in FP vs FN |
| cg05291374 | 0.426   | 0.707   | -0.281    | 8e-05            | DIXDC1                | Hypomethylated in FP vs FN |
| cg18365406 | 0.502   | 0.761   | -0.259    | 8e-05            | NA                    | Hypomethylated in FP vs FN |
| cg27167613 | 0.404   | 0.707   | -0.303    | 8e-05            | GRIK5                 | Hypomethylated in FP vs FN |
| cg17173663 | 0.285   | 0.584   | -0.299    | 8e-05            | NA                    | Hypomethylated in FP vs FN |
| cg03668103 | 0.168   | 0.474   | -0.306    | 8e-05            | PKHD1L1               | Hypomethylated in FP vs FN |
| cg13566141 | 0.484   | 0.771   | -0.287    | 8e-05            | NA                    | Hypomethylated in FP vs FN |
| cg18129628 | 0.437   | 0.742   | -0.305    | 8e-05            | NA                    | Hypomethylated in FP vs FN |
| cg25584862 | 0.344   | 0.602   | -0.258    | 8e-05            | NA                    | Hypomethylated in FP vs FN |
| cg14393114 | 0.187   | 0.515   | -0.328    | 8e-05            | ZSWIM2                | Hypomethylated in FP vs FN |
| cg11763914 | 0.443   | 0.726   | -0.283    | 8e-05            | NA                    | Hypomethylated in FP vs FN |
| cg07920525 | 0.176   | 0.517   | -0.341    | 8e-05            | NA                    | Hypomethylated in FP vs FN |
| cg05845757 | 0.416   | 0.695   | -0.279    | 8e-05            | NA                    | Hypomethylated in FP vs FN |
| cg26678605 | 0.176   | 0.574   | -0.398    | 8e-05            | NA                    | Hypomethylated in FP vs FN |

### Supplementary Table 7 (continued)

| Probe      | FP.mean | FN.mean | Mean.diff | Adjusted.P.value | Promoter.related.gene | Category                   |
|------------|---------|---------|-----------|------------------|-----------------------|----------------------------|
| cg07992500 | 0.396   | 0.677   | -0.282    | 8e-05            | NA                    | Hypomethylated in FP vs FN |
| cg04036593 | 0.512   | 0.792   | -0.280    | 8e-05            | NA                    | Hypomethylated in FP vs FN |
| cg04919784 | 0.122   | 0.468   | -0.346    | 8e-05            | NA                    | Hypomethylated in FP vs FN |
| cg13278267 | 0.226   | 0.535   | -0.309    | 8e-05            | NA                    | Hypomethylated in FP vs FN |
| cg00872726 | 0.115   | 0.451   | -0.335    | 8e-05            | NA                    | Hypomethylated in FP vs FN |
| cg13710814 | 0.540   | 0.800   | -0.260    | 8e-05            | NA                    | Hypomethylated in FP vs FN |
| cg02510802 | 0.313   | 0.631   | -0.318    | 8e-05            | SPAG4L                | Hypomethylated in FP vs FN |
| cg26160564 | 0.449   | 0.761   | -0.312    | 8e-05            | NA                    | Hypomethylated in FP vs FN |
| cg14940048 | 0.432   | 0.748   | -0.315    | 8e-05            | NA                    | Hypomethylated in FP vs FN |
| cg22496559 | 0.520   | 0.794   | -0.274    | 8e-05            | TM4SF19               | Hypomethylated in FP vs FN |
| cg02862867 | 0.304   | 0.572   | -0.268    | 8e-05            | IPO9                  | Hypomethylated in FP vs FN |
| cg14937228 | 0.431   | 0.685   | -0.254    | 8e-05            | NA                    | Hypomethylated in FP vs FN |
| cg11405852 | 0.499   | 0.764   | -0.266    | 8e-05            | KRT72                 | Hypomethylated in FP vs FN |
| cg08186924 | 0.170   | 0.433   | -0.263    | 8e-05            | NA                    | Hypomethylated in FP vs FN |
| cg00522231 | 0.556   | 0.839   | -0.283    | 8e-05            | NA                    | Hypomethylated in FP vs FN |
| cg11416276 | 0.482   | 0.754   | -0.272    | 9e-05            | NA                    | Hypomethylated in FP vs FN |
| cg22248052 | 0.248   | 0.604   | -0.356    | 9e-05            | NA                    | Hypomethylated in FP vs FN |
| cg24721647 | 0.321   | 0.627   | -0.305    | 9e-05            | NA                    | Hypomethylated in FP vs FN |
| cg03209642 | 0.102   | 0.440   | -0.338    | 9e-05            | FES                   | Hypomethylated in FP vs FN |
| cg11023900 | 0.267   | 0.613   | -0.346    | 9e-05            | NA                    | Hypomethylated in FP vs FN |
| cg00170459 | 0.454   | 0.762   | -0.307    | 9e-05            | NA                    | Hypomethylated in FP vs FN |
| cg01527159 | 0.291   | 0.585   | -0.294    | 9e-05            | NA                    | Hypomethylated in FP vs FN |
| cg23922739 | 0.174   | 0.459   | -0.285    | 9e-05            | NA                    | Hypomethylated in FP vs FN |
| cg23026602 | 0.251   | 0.577   | -0.325    | 9e-05            | NA                    | Hypomethylated in FP vs FN |
| cg07139284 | 0.337   | 0.694   | -0.357    | 9e-05            | NA                    | Hypomethylated in FP vs FN |



### Supplementary Table 7 (continued)

| Probe      | FP.mean | FN.mean | Mean.diff | Adjusted.P.value | Promoter.related.gene | Category                   |
|------------|---------|---------|-----------|------------------|-----------------------|----------------------------|
| cg19981828 | 0.309   | 0.594   | -0.286    | 9e-05            | CLRN1_CLRN1OS         | Hypomethylated in FP vs FN |
| cg11919577 | 0.280   | 0.531   | -0.251    | 9e-05            | NA                    | Hypomethylated in FP vs FN |
| cg00310404 | 0.497   | 0.747   | -0.250    | 9e-05            | NA                    | Hypomethylated in FP vs FN |
| cg23303074 | 0.148   | 0.463   | -0.315    | 9e-05            | NA                    | Hypomethylated in FP vs FN |
| cg07890553 | 0.390   | 0.683   | -0.293    | 9e-05            | TMEM39A               | Hypomethylated in FP vs FN |
| cg20904286 | 0.393   | 0.664   | -0.271    | 9e-05            | NA                    | Hypomethylated in FP vs FN |
| cg05896682 | 0.211   | 0.509   | -0.298    | 9e-05            | NA                    | Hypomethylated in FP vs FN |
| cg04859969 | 0.266   | 0.553   | -0.286    | 9e-05            | NA                    | Hypomethylated in FP vs FN |
| cg01500527 | 0.509   | 0.765   | -0.256    | 9e-05            | NA                    | Hypomethylated in FP vs FN |
| cg20764887 | 0.326   | 0.686   | -0.360    | 9e-05            | NA                    | Hypomethylated in FP vs FN |
| cg16200799 | 0.401   | 0.665   | -0.264    | 9e-05            | NA                    | Hypomethylated in FP vs FN |
| cg12982322 | 0.350   | 0.692   | -0.342    | 9e-05            | NA                    | Hypomethylated in FP vs FN |
| cg23352424 | 0.550   | 0.802   | -0.252    | 9e-05            | NA                    | Hypomethylated in FP vs FN |
| cg18579879 | 0.374   | 0.686   | -0.312    | 9e-05            | WNT16                 | Hypomethylated in FP vs FN |
| cg22790377 | 0.354   | 0.672   | -0.318    | 9e-05            | C1orf35               | Hypomethylated in FP vs FN |
| cg15471073 | 0.473   | 0.747   | -0.274    | 9e-05            | NA                    | Hypomethylated in FP vs FN |
| cg20454518 | 0.298   | 0.597   | -0.300    | 9e-05            | NA                    | Hypomethylated in FP vs FN |
| cg08631328 | 0.363   | 0.663   | -0.300    | 9e-05            | NA                    | Hypomethylated in FP vs FN |
| cg10764068 | 0.439   | 0.690   | -0.251    | 9e-05            | NA                    | Hypomethylated in FP vs FN |
| cg14830791 | 0.302   | 0.577   | -0.274    | 9e-05            | NA                    | Hypomethylated in FP vs FN |
| cg23633028 | 0.407   | 0.677   | -0.270    | 9e-05            | NA                    | Hypomethylated in FP vs FN |
| cg10266060 | 0.387   | 0.643   | -0.256    | 9e-05            | NA                    | Hypomethylated in FP vs FN |
| cg27079680 | 0.270   | 0.563   | -0.293    | 9e-05            | LOC134466             | Hypomethylated in FP vs FN |
| cg00998387 | 0.297   | 0.641   | -0.344    | 9e-05            | NA                    | Hypomethylated in FP vs FN |
| cg00356131 | 0.510   | 0.799   | -0.289    | 9e-05            | NA                    | Hypomethylated in FP vs FN |

### Supplementary Table 7 (continued)

| Probe      | FP.mean | FN.mean | Mean.diff | Adjusted.P.value | Promoter.related.gene | Category                   |
|------------|---------|---------|-----------|------------------|-----------------------|----------------------------|
| cg07293445 | 0.126   | 0.464   | -0.339    | 9e-05            | NA                    | Hypomethylated in FP vs FN |
| cg15120454 | 0.159   | 0.478   | -0.319    | 9e-05            | RHBG                  | Hypomethylated in FP vs FN |
| cg14506032 | 0.357   | 0.621   | -0.264    | 9e-05            | NA                    | Hypomethylated in FP vs FN |
| cg21533997 | 0.193   | 0.456   | -0.264    | 9e-05            | PTGER1                | Hypomethylated in FP vs FN |
| cg18692678 | 0.267   | 0.597   | -0.330    | 9e-05            | NA                    | Hypomethylated in FP vs FN |
| cg21576256 | 0.442   | 0.702   | -0.260    | 9e-05            | NA                    | Hypomethylated in FP vs FN |
| cg15195321 | 0.098   | 0.395   | -0.297    | 9e-05            | HAND2                 | Hypomethylated in FP vs FN |
| cg01398941 | 0.350   | 0.692   | -0.343    | 9e-05            | NA                    | Hypomethylated in FP vs FN |
| cg17150246 | 0.184   | 0.533   | -0.349    | 9e-05            | KLHDC9                | Hypomethylated in FP vs FN |
| cg23588360 | 0.252   | 0.574   | -0.322    | 9e-05            | NA                    | Hypomethylated in FP vs FN |
| cg04484550 | 0.451   | 0.780   | -0.329    | 9e-05            | NA                    | Hypomethylated in FP vs FN |
| cg05638689 | 0.275   | 0.617   | -0.342    | 9e-05            | NA                    | Hypomethylated in FP vs FN |
| cg26848718 | 0.213   | 0.572   | -0.359    | 9e-05            | NA                    | Hypomethylated in FP vs FN |
| cg18750087 | 0.304   | 0.559   | -0.255    | 9e-05            | NA                    | Hypomethylated in FP vs FN |
| cg17439800 | 0.402   | 0.654   | -0.252    | 9e-05            | NA                    | Hypomethylated in FP vs FN |
| cg07703790 | 0.428   | 0.729   | -0.300    | 9e-05            | DSG1                  | Hypomethylated in FP vs FN |
| cg08171336 | 0.347   | 0.645   | -0.297    | 9e-05            | TIGD5                 | Hypomethylated in FP vs FN |
| cg09614415 | 0.148   | 0.573   | -0.425    | 9e-05            | FOXI2                 | Hypomethylated in FP vs FN |
| cg24389730 | 0.166   | 0.489   | -0.323    | 9e-05            | MIR152                | Hypomethylated in FP vs FN |
| cg27324576 | 0.542   | 0.809   | -0.267    | 9e-05            | NA                    | Hypomethylated in FP vs FN |
| cg02167020 | 0.251   | 0.587   | -0.336    | 9e-05            | NA                    | Hypomethylated in FP vs FN |
| cg10407489 | 0.496   | 0.763   | -0.268    | 9e-05            | NA                    | Hypomethylated in FP vs FN |
| cg23251858 | 0.402   | 0.653   | -0.251    | 9e-05            | NA                    | Hypomethylated in FP vs FN |
| cg00248242 | 0.397   | 0.690   | -0.293    | 9e-05            | NA                    | Hypomethylated in FP vs FN |
| cg00682734 | 0.214   | 0.506   | -0.293    | 9e-05            | NA                    | Hypomethylated in FP vs FN |

### Supplementary Table 7 (continued)

| Probe      | FP.mean | FN.mean | Mean.diff | Adjusted.P.value | Promoter.related.gene | Category                   |
|------------|---------|---------|-----------|------------------|-----------------------|----------------------------|
| cg10182869 | 0.403   | 0.691   | -0.288    | 9e-05            | TMEM196               | Hypomethylated in FP vs FN |
| cg04607412 | 0.394   | 0.691   | -0.298    | 9e-05            | NA                    | Hypomethylated in FP vs FN |
| cg07169046 | 0.375   | 0.631   | -0.255    | 9e-05            | NA                    | Hypomethylated in FP vs FN |
| cg16173847 | 0.338   | 0.600   | -0.262    | 9e-05            | NA                    | Hypomethylated in FP vs FN |
| cg06341054 | 0.114   | 0.446   | -0.333    | 9e-05            | SPATA18               | Hypomethylated in FP vs FN |
| cg26685743 | 0.478   | 0.748   | -0.271    | 9e-05            | NA                    | Hypomethylated in FP vs FN |
| cg03904291 | 0.384   | 0.634   | -0.251    | 9e-05            | ABCG4                 | Hypomethylated in FP vs FN |
| cg12334871 | 0.376   | 0.651   | -0.275    | 9e-05            | NA                    | Hypomethylated in FP vs FN |
| cg17611046 | 0.296   | 0.548   | -0.252    | 9e-05            | NA                    | Hypomethylated in FP vs FN |
| cg17238830 | 0.461   | 0.712   | -0.250    | 9e-05            | NA                    | Hypomethylated in FP vs FN |
| cg02071294 | 0.111   | 0.409   | -0.298    | 9e-05            | NA                    | Hypomethylated in FP vs FN |
| cg18146737 | 0.246   | 0.560   | -0.314    | 9e-05            | NA                    | Hypomethylated in FP vs FN |
| cg02327997 | 0.148   | 0.441   | -0.292    | 9e-05            | ADAM12                | Hypomethylated in FP vs FN |
| cg13453374 | 0.284   | 0.591   | -0.307    | 9e-05            | NA                    | Hypomethylated in FP vs FN |
| cg17037963 | 0.165   | 0.465   | -0.300    | 9e-05            | NA                    | Hypomethylated in FP vs FN |
| cg01808723 | 0.475   | 0.739   | -0.264    | 9e-05            | NA                    | Hypomethylated in FP vs FN |
| cg23115387 | 0.382   | 0.653   | -0.271    | 9e-05            | FOXE3                 | Hypomethylated in FP vs FN |
| cg01256365 | 0.350   | 0.613   | -0.263    | 9e-05            | NA                    | Hypomethylated in FP vs FN |
| cg05237641 | 0.097   | 0.381   | -0.285    | 1e-04            | ADAM12                | Hypomethylated in FP vs FN |
| cg06638723 | 0.422   | 0.717   | -0.295    | 1e-04            | MIR548F1              | Hypomethylated in FP vs FN |
| cg15473017 | 0.280   | 0.619   | -0.339    | 1e-04            | NA                    | Hypomethylated in FP vs FN |
| cg27208079 | 0.463   | 0.755   | -0.292    | 1e-04            | NA                    | Hypomethylated in FP vs FN |
| cg05579030 | 0.352   | 0.690   | -0.338    | 1e-04            | PCDHB5                | Hypomethylated in FP vs FN |
| cg20503956 | 0.218   | 0.552   | -0.334    | 1e-04            | CA13                  | Hypomethylated in FP vs FN |
| cg19107469 | 0.174   | 0.425   | -0.251    | 1e-04            | NA                    | Hypomethylated in FP vs FN |

### Supplementary Table 7 (continued)

| Probe      | FP.mean | FN.mean | Mean.diff | Adjusted.P.value | Promoter.related.gene | Category                   |
|------------|---------|---------|-----------|------------------|-----------------------|----------------------------|
| cg24427504 | 0.142   | 0.463   | -0.321    | 1e-04            | NA                    | Hypomethylated in FP vs FN |
| cg11703759 | 0.473   | 0.734   | -0.261    | 1e-04            | NA                    | Hypomethylated in FP vs FN |
| cg01089834 | 0.226   | 0.477   | -0.251    | 1e-04            | PCDHA3                | Hypomethylated in FP vs FN |
| cg17473898 | 0.279   | 0.565   | -0.286    | 1e-04            | NA                    | Hypomethylated in FP vs FN |
| cg06392753 | 0.461   | 0.770   | -0.308    | 1e-04            | NA                    | Hypomethylated in FP vs FN |
| cg27007255 | 0.350   | 0.618   | -0.268    | 1e-04            | NA                    | Hypomethylated in FP vs FN |
| cg07203490 | 0.349   | 0.621   | -0.272    | 1e-04            | NA                    | Hypomethylated in FP vs FN |
| cg23318786 | 0.077   | 0.363   | -0.286    | 1e-04            | NA                    | Hypomethylated in FP vs FN |
| cg11322797 | 0.426   | 0.751   | -0.325    | 1e-04            | NA                    | Hypomethylated in FP vs FN |
| cg08899471 | 0.344   | 0.620   | -0.276    | 1e-04            | NA                    | Hypomethylated in FP vs FN |
| cg01587386 | 0.459   | 0.716   | -0.257    | 1e-04            | NA                    | Hypomethylated in FP vs FN |
| cg12707135 | 0.273   | 0.632   | -0.359    | 1e-04            | NA                    | Hypomethylated in FP vs FN |
| cg18664869 | 0.314   | 0.600   | -0.285    | 1e-04            | PCDHB15               | Hypomethylated in FP vs FN |
| cg27124774 | 0.281   | 0.560   | -0.278    | 1e-04            | PCDHB10               | Hypomethylated in FP vs FN |
| cg04538990 | 0.495   | 0.771   | -0.275    | 1e-04            | NA                    | Hypomethylated in FP vs FN |
| cg07759903 | 0.345   | 0.624   | -0.279    | 1e-04            | NA                    | Hypomethylated in FP vs FN |
| cg12331932 | 0.331   | 0.636   | -0.305    | 1e-04            | CD300A                | Hypomethylated in FP vs FN |
| cg27183030 | 0.085   | 0.339   | -0.254    | 1e-04            | NA                    | Hypomethylated in FP vs FN |
| cg18921025 | 0.475   | 0.727   | -0.252    | 1e-04            | NA                    | Hypomethylated in FP vs FN |
| cg21558509 | 0.222   | 0.530   | -0.309    | 1e-04            | NA                    | Hypomethylated in FP vs FN |
| cg13490403 | 0.123   | 0.514   | -0.391    | 1e-04            | NA                    | Hypomethylated in FP vs FN |
| cg21691065 | 0.471   | 0.757   | -0.286    | 1e-04            | NA                    | Hypomethylated in FP vs FN |
| cg03607680 | 0.392   | 0.709   | -0.317    | 1e-04            | NA                    | Hypomethylated in FP vs FN |
| cg08539210 | 0.245   | 0.575   | -0.330    | 1e-04            | AFG3L1_CENPBD1        | Hypomethylated in FP vs FN |
| cg23249868 | 0.391   | 0.645   | -0.254    | 1e-04            | NA                    | Hypomethylated in FP vs FN |

### Supplementary Table 7 (continued)

| Probe      | FP.mean | FN.mean | Mean.diff | Adjusted.P.value | Promoter.related.gene | Category                   |
|------------|---------|---------|-----------|------------------|-----------------------|----------------------------|
| cg01510278 | 0.486   | 0.739   | -0.254    | 1e-04            | NA                    | Hypomethylated in FP vs FN |
| cg15183092 | 0.193   | 0.507   | -0.313    | 1e-04            | NA                    | Hypomethylated in FP vs FN |
| cg04392284 | 0.256   | 0.531   | -0.275    | 1e-04            | NA                    | Hypomethylated in FP vs FN |
| cg07320496 | 0.391   | 0.642   | -0.251    | 1e-04            | ATP10B                | Hypomethylated in FP vs FN |
| cg14283447 | 0.304   | 0.592   | -0.287    | 1e-04            | TFF3                  | Hypomethylated in FP vs FN |
| cg14196225 | 0.297   | 0.576   | -0.279    | 1e-04            | HOPX                  | Hypomethylated in FP vs FN |
| cg19274612 | 0.275   | 0.596   | -0.321    | 1e-04            | NA                    | Hypomethylated in FP vs FN |
| cg05490023 | 0.280   | 0.540   | -0.260    | 1e-04            | NA                    | Hypomethylated in FP vs FN |
| cg03448548 | 0.311   | 0.575   | -0.264    | 1e-04            | NA                    | Hypomethylated in FP vs FN |
| cg12821278 | 0.266   | 0.548   | -0.281    | 1e-04            | DBC1                  | Hypomethylated in FP vs FN |
| cg05392777 | 0.374   | 0.702   | -0.328    | 1e-04            | NA                    | Hypomethylated in FP vs FN |
| cg07033513 | 0.468   | 0.756   | -0.288    | 1e-04            | NA                    | Hypomethylated in FP vs FN |
| cg16797473 | 0.408   | 0.706   | -0.297    | 1e-04            | NA                    | Hypomethylated in FP vs FN |
| cg22290648 | 0.199   | 0.555   | -0.356    | 1e-04            | SYCN                  | Hypomethylated in FP vs FN |
| cg19621427 | 0.517   | 0.768   | -0.252    | 1e-04            | NA                    | Hypomethylated in FP vs FN |
| cg07630327 | 0.357   | 0.625   | -0.268    | 1e-04            | NA                    | Hypomethylated in FP vs FN |
| cg14444710 | 0.427   | 0.701   | -0.274    | 1e-04            | PDPK1                 | Hypomethylated in FP vs FN |
| cg25412979 | 0.152   | 0.407   | -0.255    | 1e-04            | PCDHB7                | Hypomethylated in FP vs FN |
| cg09432154 | 0.411   | 0.688   | -0.277    | 1e-04            | GPR87                 | Hypomethylated in FP vs FN |
| cg16685313 | 0.426   | 0.731   | -0.304    | 1e-04            | NA                    | Hypomethylated in FP vs FN |
| cg21069814 | 0.570   | 0.849   | -0.279    | 1e-04            | NA                    | Hypomethylated in FP vs FN |
| cg07586956 | 0.469   | 0.734   | -0.264    | 1e-04            | NA                    | Hypomethylated in FP vs FN |
| cg21404878 | 0.310   | 0.596   | -0.286    | 1e-04            | NA                    | Hypomethylated in FP vs FN |
| cg03208426 | 0.134   | 0.404   | -0.270    | 1e-04            | NA                    | Hypomethylated in FP vs FN |
| cg00289503 | 0.384   | 0.656   | -0.272    | 1e-04            | NA                    | Hypomethylated in FP vs FN |

### Supplementary Table 7 (continued)

| Probe      | FP.mean | FN.mean | Mean.diff | Adjusted.P.value | Promoter.related.gene | Category                   |
|------------|---------|---------|-----------|------------------|-----------------------|----------------------------|
| cg01957150 | 0.432   | 0.687   | -0.255    | 1e-04            | NA                    | Hypomethylated in FP vs FN |
| cg15812586 | 0.366   | 0.624   | -0.257    | 1e-04            | NA                    | Hypomethylated in FP vs FN |
| cg09252806 | 0.274   | 0.559   | -0.285    | 1e-04            | NA                    | Hypomethylated in FP vs FN |
| cg10136012 | 0.231   | 0.534   | -0.303    | 1e-04            | NA                    | Hypomethylated in FP vs FN |
| cg12160258 | 0.287   | 0.614   | -0.327    | 1e-04            | TMEM26                | Hypomethylated in FP vs FN |
| cg02642822 | 0.349   | 0.651   | -0.302    | 1e-04            | LOC404266             | Hypomethylated in FP vs FN |
| cg27592564 | 0.276   | 0.634   | -0.358    | 1e-04            | NA                    | Hypomethylated in FP vs FN |
| cg23346622 | 0.143   | 0.490   | -0.346    | 1e-04            | NA                    | Hypomethylated in FP vs FN |
| cg26598831 | 0.347   | 0.626   | -0.279    | 1e-04            | NA                    | Hypomethylated in FP vs FN |
| cg10395448 | 0.168   | 0.472   | -0.304    | 1e-04            | GJB6                  | Hypomethylated in FP vs FN |
| cg20848441 | 0.420   | 0.686   | -0.265    | 1e-04            | NA                    | Hypomethylated in FP vs FN |
| cg11593729 | 0.366   | 0.642   | -0.276    | 1e-04            | CLRN1_CLRN1OS         | Hypomethylated in FP vs FN |
| cg19787532 | 0.304   | 0.617   | -0.314    | 1e-04            | TBX5                  | Hypomethylated in FP vs FN |
| cg00181061 | 0.502   | 0.768   | -0.266    | 1e-04            | NA                    | Hypomethylated in FP vs FN |
| cg23183559 | 0.294   | 0.618   | -0.324    | 1e-04            | NA                    | Hypomethylated in FP vs FN |
| cg03299329 | 0.330   | 0.629   | -0.299    | 1e-04            | FAM26D                | Hypomethylated in FP vs FN |
| cg16620526 | 0.153   | 0.486   | -0.332    | 1e-04            | LVRN                  | Hypomethylated in FP vs FN |
| cg13126790 | 0.365   | 0.632   | -0.267    | 1e-04            | NA                    | Hypomethylated in FP vs FN |
| cg09100695 | 0.239   | 0.649   | -0.410    | 1e-04            | TPD52L1               | Hypomethylated in FP vs FN |
| cg13673363 | 0.477   | 0.734   | -0.257    | 1e-04            | NA                    | Hypomethylated in FP vs FN |
| cg23547017 | 0.279   | 0.585   | -0.305    | 1e-04            | NA                    | Hypomethylated in FP vs FN |
| cg10131657 | 0.094   | 0.410   | -0.317    | 1e-04            | PKHD1L1               | Hypomethylated in FP vs FN |
| cg08937774 | 0.541   | 0.806   | -0.265    | 1e-04            | NA                    | Hypomethylated in FP vs FN |
| cg13007502 | 0.576   | 0.848   | -0.272    | 1e-04            | NA                    | Hypomethylated in FP vs FN |
| cg25592513 | 0.190   | 0.488   | -0.298    | 1e-04            | PCDHGB1               | Hypomethylated in FP vs FN |

### Supplementary Table 7 (continued)

| Probe      | FP.mean | FN.mean | Mean.diff | Adjusted.P.value | Promoter.related.gene | Category                   |
|------------|---------|---------|-----------|------------------|-----------------------|----------------------------|
| cg11165765 | 0.377   | 0.628   | -0.251    | 1e-04            | NA                    | Hypomethylated in FP vs FN |
| cg00783000 | 0.445   | 0.726   | -0.282    | 1e-04            | NA                    | Hypomethylated in FP vs FN |
| cg21868063 | 0.277   | 0.564   | -0.287    | 1e-04            | MGAT5B                | Hypomethylated in FP vs FN |
| cg02863073 | 0.171   | 0.529   | -0.358    | 1e-04            | SYCN                  | Hypomethylated in FP vs FN |
| cg26444951 | 0.242   | 0.568   | -0.326    | 1e-04            | NA                    | Hypomethylated in FP vs FN |
| cg20679011 | 0.291   | 0.542   | -0.252    | 1e-04            | NA                    | Hypomethylated in FP vs FN |
| cg17863312 | 0.353   | 0.668   | -0.315    | 1e-04            | NA                    | Hypomethylated in FP vs FN |
| cg13320211 | 0.556   | 0.812   | -0.256    | 1e-04            | NA                    | Hypomethylated in FP vs FN |
| cg19513940 | 0.244   | 0.564   | -0.320    | 1e-04            | NA                    | Hypomethylated in FP vs FN |
| cg04475846 | 0.366   | 0.617   | -0.251    | 1e-04            | KRT2                  | Hypomethylated in FP vs FN |
| cg24325996 | 0.324   | 0.654   | -0.330    | 1e-04            | CRABP1                | Hypomethylated in FP vs FN |
| cg02207155 | 0.433   | 0.707   | -0.273    | 1e-04            | NA                    | Hypomethylated in FP vs FN |
| cg22912331 | 0.242   | 0.494   | -0.253    | 1e-04            | NA                    | Hypomethylated in FP vs FN |
| cg17749384 | 0.298   | 0.552   | -0.254    | 1e-04            | MPP7                  | Hypomethylated in FP vs FN |
| cg02680314 | 0.311   | 0.614   | -0.303    | 1e-04            | NA                    | Hypomethylated in FP vs FN |
| cg04076817 | 0.373   | 0.626   | -0.253    | 1e-04            | NA                    | Hypomethylated in FP vs FN |
| cg18692149 | 0.216   | 0.615   | -0.399    | 1e-04            | NA                    | Hypomethylated in FP vs FN |
| cg14968732 | 0.289   | 0.551   | -0.262    | 1e-04            | NA                    | Hypomethylated in FP vs FN |
| cg20992181 | 0.206   | 0.556   | -0.349    | 1e-04            | NA                    | Hypomethylated in FP vs FN |
| cg01307915 | 0.143   | 0.441   | -0.297    | 1e-04            | NA                    | Hypomethylated in FP vs FN |
| cg06497198 | 0.096   | 0.435   | -0.339    | 1e-04            | NHLRC1                | Hypomethylated in FP vs FN |
| cg13471599 | 0.428   | 0.734   | -0.305    | 1e-04            | NA                    | Hypomethylated in FP vs FN |
| cg13297960 | 0.443   | 0.741   | -0.297    | 1e-04            | NCAM2                 | Hypomethylated in FP vs FN |
| cg24901091 | 0.421   | 0.732   | -0.311    | 1e-04            | NA                    | Hypomethylated in FP vs FN |
| cg03447435 | 0.268   | 0.589   | -0.321    | 1e-04            | PCDHGB1               | Hypomethylated in FP vs FN |

### Supplementary Table 7 (continued)

| Probe      | FP.mean | FN.mean | Mean.diff | Adjusted.P.value | Promoter.related.gene | Category                   |
|------------|---------|---------|-----------|------------------|-----------------------|----------------------------|
| cg18057109 | 0.286   | 0.581   | -0.295    | 1e-04            | NA                    | Hypomethylated in FP vs FN |
| cg03729152 | 0.453   | 0.756   | -0.302    | 1e-04            | NA                    | Hypomethylated in FP vs FN |
| cg17430805 | 0.386   | 0.645   | -0.259    | 1e-04            | NA                    | Hypomethylated in FP vs FN |
| cg12671744 | 0.215   | 0.502   | -0.287    | 1e-04            | FAAH                  | Hypomethylated in FP vs FN |
| cg19202813 | 0.474   | 0.753   | -0.279    | 1e-04            | NA                    | Hypomethylated in FP vs FN |
| cg00877329 | 0.344   | 0.675   | -0.331    | 1e-04            | HPSE2                 | Hypomethylated in FP vs FN |
| cg15402529 | 0.455   | 0.750   | -0.295    | 1e-04            | NA                    | Hypomethylated in FP vs FN |
| cg24161501 | 0.236   | 0.571   | -0.335    | 1e-04            | NA                    | Hypomethylated in FP vs FN |
| cg10902717 | 0.155   | 0.482   | -0.327    | 1e-04            | NA                    | Hypomethylated in FP vs FN |
| cg09813060 | 0.395   | 0.679   | -0.284    | 1e-04            | NA                    | Hypomethylated in FP vs FN |
| cg14163444 | 0.132   | 0.389   | -0.256    | 1e-04            | NA                    | Hypomethylated in FP vs FN |
| cg26630735 | 0.348   | 0.690   | -0.342    | 1e-04            | CCDC68                | Hypomethylated in FP vs FN |
| cg07046818 | 0.373   | 0.675   | -0.301    | 1e-04            | NA                    | Hypomethylated in FP vs FN |
| cg25420952 | 0.436   | 0.691   | -0.254    | 1e-04            | AMBP                  | Hypomethylated in FP vs FN |
| cg11841394 | 0.248   | 0.597   | -0.348    | 1e-04            | NA                    | Hypomethylated in FP vs FN |
| cg12494355 | 0.362   | 0.613   | -0.251    | 1e-04            | NA                    | Hypomethylated in FP vs FN |
| cg27064287 | 0.321   | 0.664   | -0.343    | 1e-04            | BANK1                 | Hypomethylated in FP vs FN |
| cg03145999 | 0.095   | 0.476   | -0.381    | 1e-04            | ZSCAN18               | Hypomethylated in FP vs FN |
| cg10418567 | 0.082   | 0.403   | -0.320    | 1e-04            | SPATA18               | Hypomethylated in FP vs FN |
| cg20970845 | 0.496   | 0.759   | -0.263    | 1e-04            | NA                    | Hypomethylated in FP vs FN |
| cg01704957 | 0.125   | 0.377   | -0.252    | 1e-04            | YBX2                  | Hypomethylated in FP vs FN |
| cg11949335 | 0.471   | 0.753   | -0.282    | 1e-04            | NA                    | Hypomethylated in FP vs FN |
| cg27631199 | 0.364   | 0.683   | -0.319    | 1e-04            | NA                    | Hypomethylated in FP vs FN |
| cg06927900 | 0.297   | 0.558   | -0.261    | 1e-04            | NA                    | Hypomethylated in FP vs FN |
| cg07122905 | 0.298   | 0.564   | -0.266    | 1e-04            | TC2N                  | Hypomethylated in FP vs FN |



### Supplementary Table 7 (continued)

| Probe      | FP.mean | FN.mean | Mean.diff | Adjusted.P.value | Promoter.related.gene | Category                   |
|------------|---------|---------|-----------|------------------|-----------------------|----------------------------|
| cg21546184 | 0.317   | 0.693   | -0.376    | 1e-04            | NA                    | Hypomethylated in FP vs FN |
| cg00914726 | 0.295   | 0.627   | -0.333    | 1e-04            | C1orf87               | Hypomethylated in FP vs FN |
| cg16176379 | 0.126   | 0.485   | -0.359    | 1e-04            | LPCAT2                | Hypomethylated in FP vs FN |
| cg27376924 | 0.168   | 0.538   | -0.370    | 1e-04            | NA                    | Hypomethylated in FP vs FN |
| cg04273871 | 0.381   | 0.674   | -0.293    | 1e-04            | NA                    | Hypomethylated in FP vs FN |
| cg01939741 | 0.347   | 0.623   | -0.276    | 1e-04            | NA                    | Hypomethylated in FP vs FN |
| cg14187242 | 0.355   | 0.618   | -0.263    | 1e-04            | NA                    | Hypomethylated in FP vs FN |
| cg13932794 | 0.217   | 0.472   | -0.254    | 1e-04            | NA                    | Hypomethylated in FP vs FN |
| cg04837832 | 0.305   | 0.626   | -0.321    | 1e-04            | NA                    | Hypomethylated in FP vs FN |
| cg06619621 | 0.150   | 0.503   | -0.353    | 1e-04            | NA                    | Hypomethylated in FP vs FN |
| cg14656153 | 0.539   | 0.791   | -0.252    | 1e-04            | NA                    | Hypomethylated in FP vs FN |
| cg06383233 | 0.457   | 0.739   | -0.282    | 1e-04            | NA                    | Hypomethylated in FP vs FN |
| cg15674432 | 0.228   | 0.500   | -0.272    | 1e-04            | NA                    | Hypomethylated in FP vs FN |
| cg00206779 | 0.359   | 0.672   | -0.313    | 1e-04            | NA                    | Hypomethylated in FP vs FN |
| cg15854847 | 0.156   | 0.524   | -0.368    | 1e-04            | NKX2-6                | Hypomethylated in FP vs FN |
| cg07312716 | 0.476   | 0.753   | -0.277    | 1e-04            | NA                    | Hypomethylated in FP vs FN |
| cg02312175 | 0.323   | 0.679   | -0.356    | 1e-04            | NA                    | Hypomethylated in FP vs FN |
| cg22798223 | 0.241   | 0.555   | -0.314    | 1e-04            | NA                    | Hypomethylated in FP vs FN |
| cg23491807 | 0.537   | 0.819   | -0.282    | 1e-04            | NA                    | Hypomethylated in FP vs FN |
| cg20824989 | 0.303   | 0.673   | -0.371    | 1e-04            | NA                    | Hypomethylated in FP vs FN |
| cg23969554 | 0.465   | 0.794   | -0.329    | 1e-04            | NA                    | Hypomethylated in FP vs FN |
| cg16562486 | 0.356   | 0.628   | -0.272    | 1e-04            | NA                    | Hypomethylated in FP vs FN |
| cg27217474 | 0.259   | 0.611   | -0.352    | 1e-04            | NA                    | Hypomethylated in FP vs FN |
| cg10134939 | 0.526   | 0.781   | -0.255    | 1e-04            | FAM176A               | Hypomethylated in FP vs FN |
| cg09244312 | 0.422   | 0.690   | -0.268    | 1e-04            | NA                    | Hypomethylated in FP vs FN |

### Supplementary Table 7 (continued)

| Probe      | FP.mean | FN.mean | Mean.diff | Adjusted.P.value | Promoter.related.gene | Category                   |
|------------|---------|---------|-----------|------------------|-----------------------|----------------------------|
| cg06707978 | 0.227   | 0.533   | -0.306    | 1e-04            | ZIK1                  | Hypomethylated in FP vs FN |
| cg04502620 | 0.371   | 0.664   | -0.293    | 1e-04            | NA                    | Hypomethylated in FP vs FN |
| cg09306340 | 0.278   | 0.620   | -0.342    | 1e-04            | KLHDC9                | Hypomethylated in FP vs FN |
| cg06327965 | 0.259   | 0.532   | -0.273    | 1e-04            | NA                    | Hypomethylated in FP vs FN |
| cg09387749 | 0.425   | 0.753   | -0.328    | 1e-04            | HOXD3                 | Hypomethylated in FP vs FN |
| cg17834632 | 0.241   | 0.500   | -0.259    | 1e-04            | NA                    | Hypomethylated in FP vs FN |
| cg18533397 | 0.239   | 0.572   | -0.333    | 1e-04            | NA                    | Hypomethylated in FP vs FN |
| cg06680369 | 0.308   | 0.644   | -0.336    | 1e-04            | NA                    | Hypomethylated in FP vs FN |
| cg02775230 | 0.470   | 0.725   | -0.256    | 1e-04            | NA                    | Hypomethylated in FP vs FN |
| cg09565319 | 0.523   | 0.858   | -0.334    | 1e-04            | NA                    | Hypomethylated in FP vs FN |
| cg01528028 | 0.361   | 0.668   | -0.307    | 1e-04            | NA                    | Hypomethylated in FP vs FN |
| cg07762764 | 0.359   | 0.616   | -0.258    | 1e-04            | NA                    | Hypomethylated in FP vs FN |
| cg00089486 | 0.217   | 0.526   | -0.309    | 1e-04            | NA                    | Hypomethylated in FP vs FN |
| cg26692873 | 0.357   | 0.710   | -0.353    | 1e-04            | NA                    | Hypomethylated in FP vs FN |
| cg22984571 | 0.081   | 0.396   | -0.315    | 1e-04            | NA                    | Hypomethylated in FP vs FN |
| cg08928038 | 0.389   | 0.647   | -0.257    | 1e-04            | GAST                  | Hypomethylated in FP vs FN |
| cg11357746 | 0.161   | 0.529   | -0.368    | 1e-04            | NA                    | Hypomethylated in FP vs FN |
| cg19630667 | 0.238   | 0.492   | -0.254    | 1e-04            | NA                    | Hypomethylated in FP vs FN |
| cg13989664 | 0.324   | 0.611   | -0.286    | 1e-04            | NA                    | Hypomethylated in FP vs FN |
| cg13556934 | 0.415   | 0.698   | -0.283    | 1e-04            | NA                    | Hypomethylated in FP vs FN |
| cg00576474 | 0.400   | 0.685   | -0.285    | 1e-04            | NA                    | Hypomethylated in FP vs FN |
| cg09150064 | 0.248   | 0.558   | -0.310    | 1e-04            | NA                    | Hypomethylated in FP vs FN |
| cg01726767 | 0.387   | 0.659   | -0.272    | 1e-04            | LALBA                 | Hypomethylated in FP vs FN |
| cg25121292 | 0.295   | 0.554   | -0.259    | 1e-04            | NA                    | Hypomethylated in FP vs FN |
| cg08700932 | 0.372   | 0.682   | -0.310    | 1e-04            | NA                    | Hypomethylated in FP vs FN |

### Supplementary Table 7 (continued)

| Probe      | FP.mean | FN.mean | Mean.diff | Adjusted.P.value | Promoter.related.gene | Category                   |
|------------|---------|---------|-----------|------------------|-----------------------|----------------------------|
| cg08264859 | 0.375   | 0.640   | -0.265    | 1e-04            | NA                    | Hypomethylated in FP vs FN |
| cg16945685 | 0.337   | 0.602   | -0.264    | 1e-04            | NA                    | Hypomethylated in FP vs FN |
| cg05188268 | 0.483   | 0.765   | -0.282    | 1e-04            | NA                    | Hypomethylated in FP vs FN |
| cg13778274 | 0.440   | 0.729   | -0.289    | 1e-04            | NA                    | Hypomethylated in FP vs FN |
| cg00512459 | 0.244   | 0.495   | -0.251    | 1e-04            | NA                    | Hypomethylated in FP vs FN |
| cg08129331 | 0.469   | 0.738   | -0.270    | 1e-04            | NA                    | Hypomethylated in FP vs FN |
| cg12138102 | 0.412   | 0.711   | -0.299    | 1e-04            | NDN                   | Hypomethylated in FP vs FN |
| cg25499537 | 0.287   | 0.551   | -0.263    | 1e-04            | IGSF10                | Hypomethylated in FP vs FN |
| cg07568117 | 0.485   | 0.757   | -0.272    | 1e-04            | NA                    | Hypomethylated in FP vs FN |
| cg02222844 | 0.521   | 0.801   | -0.280    | 1e-04            | NA                    | Hypomethylated in FP vs FN |
| cg20293352 | 0.449   | 0.746   | -0.298    | 1e-04            | CD34                  | Hypomethylated in FP vs FN |
| cg24828620 | 0.287   | 0.600   | -0.314    | 1e-04            | ZPBP                  | Hypomethylated in FP vs FN |
| cg07447742 | 0.178   | 0.460   | -0.281    | 1e-04            | MLNR                  | Hypomethylated in FP vs FN |
| cg12663550 | 0.345   | 0.596   | -0.251    | 1e-04            | NA                    | Hypomethylated in FP vs FN |
| cg06829299 | 0.235   | 0.558   | -0.323    | 1e-04            | NA                    | Hypomethylated in FP vs FN |
| cg11846905 | 0.484   | 0.755   | -0.271    | 1e-04            | NA                    | Hypomethylated in FP vs FN |
| cg24843380 | 0.085   | 0.452   | -0.367    | 1e-04            | ZNF454                | Hypomethylated in FP vs FN |
| cg13148478 | 0.308   | 0.580   | -0.272    | 1e-04            | NA                    | Hypomethylated in FP vs FN |
| cg18862566 | 0.245   | 0.546   | -0.301    | 1e-04            | NA                    | Hypomethylated in FP vs FN |
| cg25786696 | 0.245   | 0.544   | -0.299    | 1e-04            | NA                    | Hypomethylated in FP vs FN |
| cg07241573 | 0.405   | 0.686   | -0.280    | 1e-04            | GALR1                 | Hypomethylated in FP vs FN |
| cg15595627 | 0.416   | 0.676   | -0.260    | 1e-04            | NA                    | Hypomethylated in FP vs FN |
| cg18533282 | 0.156   | 0.473   | -0.317    | 1e-04            | SPATA18               | Hypomethylated in FP vs FN |
| cg15493618 | 0.391   | 0.688   | -0.297    | 1e-04            | NA                    | Hypomethylated in FP vs FN |
| cg10430077 | 0.444   | 0.697   | -0.253    | 1e-04            | NA                    | Hypomethylated in FP vs FN |

### Supplementary Table 7 (continued)

| Probe      | FP.mean | FN.mean | Mean.diff | Adjusted.P.value | Promoter.related.gene | Category                   |
|------------|---------|---------|-----------|------------------|-----------------------|----------------------------|
| cg19565094 | 0.272   | 0.527   | -0.255    | 1e-04            | NA                    | Hypomethylated in FP vs FN |
| cg18130905 | 0.526   | 0.785   | -0.259    | 1e-04            | NA                    | Hypomethylated in FP vs FN |
| cg06570931 | 0.057   | 0.315   | -0.258    | 1e-04            | NHLRC1                | Hypomethylated in FP vs FN |
| cg21436572 | 0.480   | 0.783   | -0.303    | 1e-04            | NA                    | Hypomethylated in FP vs FN |
| cg10955243 | 0.549   | 0.809   | -0.260    | 1e-04            | NA                    | Hypomethylated in FP vs FN |
| cg11982805 | 0.476   | 0.737   | -0.261    | 1e-04            | NA                    | Hypomethylated in FP vs FN |
| cg21337580 | 0.478   | 0.754   | -0.276    | 1e-04            | MTMR9                 | Hypomethylated in FP vs FN |
| cg06076901 | 0.392   | 0.658   | -0.266    | 1e-04            | NA                    | Hypomethylated in FP vs FN |
| cg08456859 | 0.521   | 0.799   | -0.279    | 1e-04            | NA                    | Hypomethylated in FP vs FN |
| cg07485417 | 0.391   | 0.673   | -0.282    | 1e-04            | NA                    | Hypomethylated in FP vs FN |
| cg03994717 | 0.387   | 0.678   | -0.291    | 1e-04            | NA                    | Hypomethylated in FP vs FN |
| cg19537719 | 0.220   | 0.628   | -0.408    | 1e-04            | NA                    | Hypomethylated in FP vs FN |
| cg19796981 | 0.174   | 0.506   | -0.332    | 1e-04            | NA                    | Hypomethylated in FP vs FN |
| cg01514538 | 0.416   | 0.728   | -0.312    | 1e-04            | NA                    | Hypomethylated in FP vs FN |
| cg13488201 | 0.117   | 0.408   | -0.290    | 1e-04            | ADAM12                | Hypomethylated in FP vs FN |
| cg06934974 | 0.475   | 0.753   | -0.278    | 1e-04            | NA                    | Hypomethylated in FP vs FN |
| cg03215105 | 0.161   | 0.439   | -0.278    | 1e-04            | NA                    | Hypomethylated in FP vs FN |
| cg26876914 | 0.400   | 0.669   | -0.269    | 1e-04            | NA                    | Hypomethylated in FP vs FN |
| cg27086874 | 0.323   | 0.610   | -0.287    | 1e-04            | PCDHB18               | Hypomethylated in FP vs FN |
| cg15006881 | 0.465   | 0.734   | -0.269    | 1e-04            | NA                    | Hypomethylated in FP vs FN |
| cg15167736 | 0.509   | 0.776   | -0.267    | 1e-04            | MUC21                 | Hypomethylated in FP vs FN |
| cg24629663 | 0.537   | 0.794   | -0.256    | 1e-04            | NA                    | Hypomethylated in FP vs FN |
| cg13439299 | 0.346   | 0.630   | -0.284    | 1e-04            | DNAJC5G               | Hypomethylated in FP vs FN |
| cg01231009 | 0.446   | 0.740   | -0.293    | 1e-04            | NA                    | Hypomethylated in FP vs FN |
| cg19244662 | 0.339   | 0.647   | -0.308    | 1e-04            | NA                    | Hypomethylated in FP vs FN |

### Supplementary Table 7 (continued)

| Probe      | FP.mean | FN.mean | Mean.diff | Adjusted.P.value | Promoter.related.gene | Category                   |
|------------|---------|---------|-----------|------------------|-----------------------|----------------------------|
| cg13510813 | 0.480   | 0.740   | -0.261    | 1e-04            | GRIK5                 | Hypomethylated in FP vs FN |
| cg22268341 | 0.543   | 0.798   | -0.256    | 1e-04            | MIR1252               | Hypomethylated in FP vs FN |
| cg25805837 | 0.552   | 0.831   | -0.279    | 1e-04            | NA                    | Hypomethylated in FP vs FN |
| cg08430395 | 0.397   | 0.696   | -0.299    | 1e-04            | NA                    | Hypomethylated in FP vs FN |
| cg16600876 | 0.394   | 0.690   | -0.296    | 1e-04            | NA                    | Hypomethylated in FP vs FN |
| cg07963046 | 0.401   | 0.715   | -0.314    | 1e-04            | NA                    | Hypomethylated in FP vs FN |
| cg09982918 | 0.314   | 0.597   | -0.284    | 1e-04            | MYO18B                | Hypomethylated in FP vs FN |
| cg22920586 | 0.543   | 0.794   | -0.251    | 1e-04            | NA                    | Hypomethylated in FP vs FN |
| cg27531496 | 0.543   | 0.828   | -0.285    | 1e-04            | NA                    | Hypomethylated in FP vs FN |
| cg18813020 | 0.235   | 0.539   | -0.304    | 1e-04            | NA                    | Hypomethylated in FP vs FN |
| cg14031402 | 0.190   | 0.440   | -0.251    | 1e-04            | NA                    | Hypomethylated in FP vs FN |
| cg26959257 | 0.298   | 0.560   | -0.261    | 1e-04            | NA                    | Hypomethylated in FP vs FN |
| cg03532926 | 0.180   | 0.568   | -0.388    | 1e-04            | NA                    | Hypomethylated in FP vs FN |
| cg07464571 | 0.330   | 0.657   | -0.327    | 1e-04            | LEP                   | Hypomethylated in FP vs FN |
| cg10837806 | 0.162   | 0.425   | -0.263    | 1e-04            | PTGDR                 | Hypomethylated in FP vs FN |
| cg16467262 | 0.262   | 0.546   | -0.284    | 1e-04            | NA                    | Hypomethylated in FP vs FN |
| cg26015971 | 0.477   | 0.736   | -0.259    | 1e-04            | NA                    | Hypomethylated in FP vs FN |
| cg01228636 | 0.189   | 0.564   | -0.375    | 1e-04            | PTEN_KILLIN           | Hypomethylated in FP vs FN |
| cg10632525 | 0.312   | 0.564   | -0.252    | 1e-04            | MN1                   | Hypomethylated in FP vs FN |
| cg06551177 | 0.457   | 0.723   | -0.266    | 1e-04            | NA                    | Hypomethylated in FP vs FN |
| cg14620138 | 0.431   | 0.731   | -0.300    | 1e-04            | NA                    | Hypomethylated in FP vs FN |
| cg20314918 | 0.373   | 0.673   | -0.300    | 1e-04            | SCN2A                 | Hypomethylated in FP vs FN |
| cg22449370 | 0.369   | 0.619   | -0.250    | 1e-04            | NA                    | Hypomethylated in FP vs FN |
| cg16136262 | 0.295   | 0.565   | -0.270    | 1e-04            | NA                    | Hypomethylated in FP vs FN |
| cg04151278 | 0.127   | 0.409   | -0.281    | 1e-04            | NA                    | Hypomethylated in FP vs FN |

### Supplementary Table 7 (continued)

| Probe      | FP.mean | FN.mean | Mean.diff | Adjusted.P.value | Promoter.related.gene | Category                   |
|------------|---------|---------|-----------|------------------|-----------------------|----------------------------|
| cg03790988 | 0.240   | 0.497   | -0.257    | 1e-04            | NA                    | Hypomethylated in FP vs FN |
| cg12367539 | 0.352   | 0.610   | -0.259    | 1e-04            | NA                    | Hypomethylated in FP vs FN |
| cg21134096 | 0.287   | 0.655   | -0.369    | 1e-04            | RHEB                  | Hypomethylated in FP vs FN |
| cg00551910 | 0.469   | 0.740   | -0.271    | 1e-04            | C14orf162             | Hypomethylated in FP vs FN |
| cg23705108 | 0.396   | 0.681   | -0.285    | 1e-04            | NA                    | Hypomethylated in FP vs FN |
| cg07122893 | 0.256   | 0.572   | -0.317    | 1e-04            | OLFML2B               | Hypomethylated in FP vs FN |
| cg02583633 | 0.300   | 0.668   | -0.369    | 1e-04            | NA                    | Hypomethylated in FP vs FN |
| cg26480413 | 0.069   | 0.321   | -0.252    | 1e-04            | WDR93                 | Hypomethylated in FP vs FN |
| cg14968300 | 0.247   | 0.529   | -0.281    | 1e-04            | NA                    | Hypomethylated in FP vs FN |
| cg27415425 | 0.438   | 0.714   | -0.276    | 1e-04            | NA                    | Hypomethylated in FP vs FN |
| cg15645660 | 0.272   | 0.653   | -0.380    | 1e-04            | NA                    | Hypomethylated in FP vs FN |
| cg04497684 | 0.519   | 0.784   | -0.265    | 1e-04            | NA                    | Hypomethylated in FP vs FN |
| cg00548708 | 0.081   | 0.425   | -0.344    | 1e-04            | NA                    | Hypomethylated in FP vs FN |
| cg05518803 | 0.155   | 0.444   | -0.289    | 1e-04            | PSTK                  | Hypomethylated in FP vs FN |
| cg17795586 | 0.492   | 0.780   | -0.288    | 1e-04            | P2RY13                | Hypomethylated in FP vs FN |
| cg09675542 | 0.374   | 0.645   | -0.271    | 1e-04            | NA                    | Hypomethylated in FP vs FN |
| cg14082061 | 0.483   | 0.741   | -0.258    | 1e-04            | NA                    | Hypomethylated in FP vs FN |
| cg12251828 | 0.382   | 0.642   | -0.260    | 1e-04            | NA                    | Hypomethylated in FP vs FN |
| cg05401764 | 0.223   | 0.615   | -0.392    | 1e-04            | NA                    | Hypomethylated in FP vs FN |
| cg06551997 | 0.204   | 0.534   | -0.330    | 1e-04            | NA                    | Hypomethylated in FP vs FN |
| cg26070540 | 0.300   | 0.644   | -0.344    | 1e-04            | COX4I2                | Hypomethylated in FP vs FN |
| cg04621020 | 0.117   | 0.460   | -0.343    | 1e-04            | SLCO4C1               | Hypomethylated in FP vs FN |
| cg25172185 | 0.327   | 0.608   | -0.280    | 1e-04            | NA                    | Hypomethylated in FP vs FN |
| cg25427880 | 0.212   | 0.467   | -0.255    | 1e-04            | NA                    | Hypomethylated in FP vs FN |
| cg04373334 | 0.259   | 0.559   | -0.300    | 1e-04            | FAT4                  | Hypomethylated in FP vs FN |

### Supplementary Table 7 (continued)

| Probe      | FP.mean | FN.mean | Mean.diff | Adjusted.P.value | Promoter.related.gene | Category                   |
|------------|---------|---------|-----------|------------------|-----------------------|----------------------------|
| cg20650515 | 0.433   | 0.748   | -0.315    | 1e-04            | NA                    | Hypomethylated in FP vs FN |
| cg05852040 | 0.084   | 0.377   | -0.294    | 1e-04            | NA                    | Hypomethylated in FP vs FN |
| cg23369632 | 0.302   | 0.585   | -0.283    | 1e-04            | NA                    | Hypomethylated in FP vs FN |
| cg15443732 | 0.264   | 0.525   | -0.261    | 1e-04            | GALR1                 | Hypomethylated in FP vs FN |
| cg27627803 | 0.259   | 0.551   | -0.292    | 1e-04            | NA                    | Hypomethylated in FP vs FN |
| cg01351327 | 0.403   | 0.691   | -0.288    | 1e-04            | NA                    | Hypomethylated in FP vs FN |
| cg14556188 | 0.581   | 0.844   | -0.263    | 1e-04            | NA                    | Hypomethylated in FP vs FN |
| cg18465945 | 0.318   | 0.585   | -0.267    | 1e-04            | NA                    | Hypomethylated in FP vs FN |
| cg20697025 | 0.105   | 0.372   | -0.267    | 1e-04            | NA                    | Hypomethylated in FP vs FN |
| cg00585714 | 0.275   | 0.549   | -0.273    | 1e-04            | NA                    | Hypomethylated in FP vs FN |
| cg09074856 | 0.388   | 0.709   | -0.321    | 1e-04            | NA                    | Hypomethylated in FP vs FN |
| cg05914537 | 0.479   | 0.754   | -0.275    | 1e-04            | NA                    | Hypomethylated in FP vs FN |
| cg21198550 | 0.214   | 0.495   | -0.282    | 1e-04            | NA                    | Hypomethylated in FP vs FN |
| cg22944499 | 0.240   | 0.566   | -0.326    | 1e-04            | LOC200726             | Hypomethylated in FP vs FN |
| cg16049391 | 0.229   | 0.508   | -0.279    | 1e-04            | BNC1                  | Hypomethylated in FP vs FN |
| cg03052301 | 0.196   | 0.540   | -0.344    | 1e-04            | NA                    | Hypomethylated in FP vs FN |
| cg13258195 | 0.366   | 0.622   | -0.255    | 1e-04            | NA                    | Hypomethylated in FP vs FN |
| cg09636202 | 0.171   | 0.506   | -0.335    | 1e-04            | NA                    | Hypomethylated in FP vs FN |
| cg14655715 | 0.400   | 0.653   | -0.253    | 1e-04            | NA                    | Hypomethylated in FP vs FN |
| cg16901361 | 0.436   | 0.717   | -0.280    | 1e-04            | NA                    | Hypomethylated in FP vs FN |
| cg18608389 | 0.073   | 0.395   | -0.322    | 1e-04            | SPATA18               | Hypomethylated in FP vs FN |
| cg02320454 | 0.194   | 0.558   | -0.364    | 1e-04            | GPR150                | Hypomethylated in FP vs FN |
| cg10262052 | 0.319   | 0.604   | -0.284    | 1e-04            | IDO1                  | Hypomethylated in FP vs FN |
| cg08493776 | 0.217   | 0.532   | -0.314    | 1e-04            | PCDHB6                | Hypomethylated in FP vs FN |
| cg24524285 | 0.189   | 0.505   | -0.316    | 1e-04            | NA                    | Hypomethylated in FP vs FN |

### Supplementary Table 7 (continued)

| Probe      | FP.mean | FN.mean | Mean.diff | Adjusted.P.value | Promoter.related.gene | Category                   |
|------------|---------|---------|-----------|------------------|-----------------------|----------------------------|
| cg15164708 | 0.244   | 0.561   | -0.318    | 1e-04            | NA                    | Hypomethylated in FP vs FN |
| cg22589161 | 0.247   | 0.627   | -0.380    | 1e-04            | RHEB                  | Hypomethylated in FP vs FN |
| cg27468419 | 0.430   | 0.699   | -0.269    | 1e-04            | SDR16C6               | Hypomethylated in FP vs FN |
| cg18595065 | 0.430   | 0.735   | -0.305    | 1e-04            | NA                    | Hypomethylated in FP vs FN |
| cg04180428 | 0.210   | 0.551   | -0.341    | 1e-04            | NA                    | Hypomethylated in FP vs FN |
| cg03089717 | 0.155   | 0.438   | -0.284    | 1e-04            | NA                    | Hypomethylated in FP vs FN |
| cg24215459 | 0.268   | 0.580   | -0.312    | 1e-04            | NA                    | Hypomethylated in FP vs FN |
| cg18492126 | 0.350   | 0.706   | -0.356    | 1e-04            | NCAM2                 | Hypomethylated in FP vs FN |
| cg27478313 | 0.180   | 0.476   | -0.296    | 1e-04            | NA                    | Hypomethylated in FP vs FN |
| cg01157650 | 0.330   | 0.598   | -0.267    | 1e-04            | NA                    | Hypomethylated in FP vs FN |
| cg15495966 | 0.275   | 0.538   | -0.263    | 1e-04            | NA                    | Hypomethylated in FP vs FN |
| cg05471495 | 0.238   | 0.509   | -0.271    | 1e-04            | NA                    | Hypomethylated in FP vs FN |
| cg19759549 | 0.178   | 0.490   | -0.311    | 1e-04            | NA                    | Hypomethylated in FP vs FN |
| cg08506113 | 0.420   | 0.706   | -0.286    | 1e-04            | NA                    | Hypomethylated in FP vs FN |
| cg07690018 | 0.238   | 0.592   | -0.353    | 1e-04            | NA                    | Hypomethylated in FP vs FN |
| cg02094500 | 0.303   | 0.649   | -0.346    | 1e-04            | NA                    | Hypomethylated in FP vs FN |
| cg08825225 | 0.303   | 0.575   | -0.271    | 1e-04            | NA                    | Hypomethylated in FP vs FN |
| cg01556552 | 0.371   | 0.630   | -0.258    | 1e-04            | NA                    | Hypomethylated in FP vs FN |
| cg15720832 | 0.373   | 0.660   | -0.287    | 1e-04            | C1orf35               | Hypomethylated in FP vs FN |
| cg00042478 | 0.550   | 0.808   | -0.258    | 1e-04            | NA                    | Hypomethylated in FP vs FN |
| cg11659942 | 0.183   | 0.464   | -0.281    | 1e-04            | NA                    | Hypomethylated in FP vs FN |
| cg18789958 | 0.148   | 0.455   | -0.308    | 1e-04            | NA                    | Hypomethylated in FP vs FN |
| cg00784153 | 0.376   | 0.637   | -0.261    | 1e-04            | NA                    | Hypomethylated in FP vs FN |
| cg18721838 | 0.267   | 0.565   | -0.298    | 1e-04            | NA                    | Hypomethylated in FP vs FN |
| cg09126090 | 0.301   | 0.608   | -0.308    | 1e-04            | NA                    | Hypomethylated in FP vs FN |



### Supplementary Table 7 (continued)

| Probe      | FP.mean | FN.mean | Mean.diff | Adjusted.P.value | Promoter.related.gene | Category                   |
|------------|---------|---------|-----------|------------------|-----------------------|----------------------------|
| cg09969277 | 0.402   | 0.751   | -0.349    | 1e-04            | NA                    | Hypomethylated in FP vs FN |
| cg13587270 | 0.266   | 0.540   | -0.273    | 1e-04            | NA                    | Hypomethylated in FP vs FN |
| cg01994014 | 0.338   | 0.607   | -0.269    | 1e-04            | NA                    | Hypomethylated in FP vs FN |
| cg16832407 | 0.323   | 0.623   | -0.300    | 1e-04            | TRPM3                 | Hypomethylated in FP vs FN |
| cg01481989 | 0.210   | 0.517   | -0.307    | 1e-04            | FRZB                  | Hypomethylated in FP vs FN |
| cg00989365 | 0.405   | 0.696   | -0.291    | 1e-04            | NA                    | Hypomethylated in FP vs FN |
| cg25555753 | 0.240   | 0.494   | -0.254    | 1e-04            | NA                    | Hypomethylated in FP vs FN |
| cg02356551 | 0.116   | 0.482   | -0.366    | 1e-04            | NA                    | Hypomethylated in FP vs FN |
| cg05211192 | 0.402   | 0.662   | -0.260    | 1e-04            | NA                    | Hypomethylated in FP vs FN |
| cg10147875 | 0.553   | 0.815   | -0.262    | 1e-04            | NA                    | Hypomethylated in FP vs FN |
| cg05823218 | 0.200   | 0.464   | -0.263    | 1e-04            | NA                    | Hypomethylated in FP vs FN |
| cg01410316 | 0.409   | 0.707   | -0.298    | 1e-04            | NA                    | Hypomethylated in FP vs FN |
| cg13085403 | 0.355   | 0.627   | -0.272    | 1e-04            | NA                    | Hypomethylated in FP vs FN |
| cg13320585 | 0.411   | 0.707   | -0.297    | 1e-04            | MIR1252               | Hypomethylated in FP vs FN |
| cg13173536 | 0.315   | 0.599   | -0.284    | 1e-04            | NA                    | Hypomethylated in FP vs FN |
| cg00091349 | 0.405   | 0.672   | -0.266    | 1e-04            | P2RY13                | Hypomethylated in FP vs FN |
| cg00493422 | 0.189   | 0.467   | -0.278    | 1e-04            | HOPX                  | Hypomethylated in FP vs FN |
| cg20932898 | 0.302   | 0.553   | -0.251    | 1e-04            | NA                    | Hypomethylated in FP vs FN |
| cg11241627 | 0.196   | 0.465   | -0.269    | 1e-04            | FERD3L                | Hypomethylated in FP vs FN |
| cg04096767 | 0.247   | 0.584   | -0.337    | 1e-04            | NA                    | Hypomethylated in FP vs FN |
| cg09851465 | 0.354   | 0.666   | -0.312    | 1e-04            | C1orf87               | Hypomethylated in FP vs FN |
| cg14925024 | 0.457   | 0.729   | -0.272    | 1e-04            | C1orf35               | Hypomethylated in FP vs FN |
| cg18841668 | 0.450   | 0.710   | -0.260    | 1e-04            | NA                    | Hypomethylated in FP vs FN |
| cg27011456 | 0.241   | 0.530   | -0.289    | 1e-04            | NA                    | Hypomethylated in FP vs FN |
| cg11628880 | 0.373   | 0.630   | -0.257    | 1e-04            | CLDN14                | Hypomethylated in FP vs FN |

**Supplementary Table 7 (continued)**

| Probe      | FP.mean | FN.mean | Mean.diff | Adjusted.P.value | Promoter.related.gene | Category                   |
|------------|---------|---------|-----------|------------------|-----------------------|----------------------------|
| cg04620418 | 0.140   | 0.420   | -0.280    | 1e-04            | NA                    | Hypomethylated in FP vs FN |
| cg12185828 | 0.090   | 0.441   | -0.351    | 1e-04            | GCA                   | Hypomethylated in FP vs FN |
| cg13050240 | 0.184   | 0.457   | -0.274    | 1e-04            | RIPK3                 | Hypomethylated in FP vs FN |
| cg01484266 | 0.571   | 0.824   | -0.253    | 1e-04            | NA                    | Hypomethylated in FP vs FN |
| cg23367608 | 0.132   | 0.435   | -0.303    | 1e-04            | FAM162B               | Hypomethylated in FP vs FN |
| cg09305883 | 0.286   | 0.551   | -0.265    | 1e-04            | NA                    | Hypomethylated in FP vs FN |
| cg13709263 | 0.209   | 0.507   | -0.298    | 1e-04            | NA                    | Hypomethylated in FP vs FN |
| cg03873322 | 0.312   | 0.599   | -0.287    | 1e-04            | NA                    | Hypomethylated in FP vs FN |
| cg04552206 | 0.374   | 0.643   | -0.269    | 1e-04            | NA                    | Hypomethylated in FP vs FN |
| cg00695982 | 0.319   | 0.600   | -0.281    | 1e-04            | NA                    | Hypomethylated in FP vs FN |
| cg13804461 | 0.250   | 0.555   | -0.305    | 1e-04            | NA                    | Hypomethylated in FP vs FN |
| cg26160218 | 0.531   | 0.805   | -0.274    | 2e-04            | NA                    | Hypomethylated in FP vs FN |
| cg00988346 | 0.207   | 0.464   | -0.256    | 2e-04            | NA                    | Hypomethylated in FP vs FN |
| cg25813711 | 0.231   | 0.495   | -0.264    | 2e-04            | NA                    | Hypomethylated in FP vs FN |
| cg10967023 | 0.441   | 0.753   | -0.312    | 2e-04            | NA                    | Hypomethylated in FP vs FN |
| cg05221738 | 0.466   | 0.747   | -0.282    | 2e-04            | NA                    | Hypomethylated in FP vs FN |
| cg02560364 | 0.485   | 0.740   | -0.255    | 2e-04            | NA                    | Hypomethylated in FP vs FN |
| cg25691167 | 0.220   | 0.617   | -0.397    | 2e-04            | FERD3L                | Hypomethylated in FP vs FN |
| cg18452695 | 0.426   | 0.694   | -0.268    | 2e-04            | NA                    | Hypomethylated in FP vs FN |
| cg07716052 | 0.407   | 0.676   | -0.268    | 2e-04            | NA                    | Hypomethylated in FP vs FN |
| cg21215576 | 0.407   | 0.691   | -0.285    | 2e-04            | NA                    | Hypomethylated in FP vs FN |
| cg17284804 | 0.186   | 0.547   | -0.362    | 2e-04            | TCTEX1D1              | Hypomethylated in FP vs FN |
| cg13151171 | 0.357   | 0.651   | -0.294    | 2e-04            | MITF                  | Hypomethylated in FP vs FN |
| cg10767008 | 0.379   | 0.650   | -0.272    | 2e-04            | NA                    | Hypomethylated in FP vs FN |
| cg20200711 | 0.334   | 0.585   | -0.251    | 2e-04            | NA                    | Hypomethylated in FP vs FN |

### Supplementary Table 7 (continued)

| Probe      | FP.mean | FN.mean | Mean.diff | Adjusted.P.value | Promoter.related.gene | Category                   |
|------------|---------|---------|-----------|------------------|-----------------------|----------------------------|
| cg14583871 | 0.411   | 0.679   | -0.269    | 2e-04            | NA                    | Hypomethylated in FP vs FN |
| cg21266502 | 0.183   | 0.469   | -0.287    | 2e-04            | NA                    | Hypomethylated in FP vs FN |
| cg08278002 | 0.526   | 0.778   | -0.252    | 2e-04            | NA                    | Hypomethylated in FP vs FN |
| cg25961816 | 0.208   | 0.476   | -0.268    | 2e-04            | NA                    | Hypomethylated in FP vs FN |
| cg23529677 | 0.545   | 0.828   | -0.283    | 2e-04            | NA                    | Hypomethylated in FP vs FN |
| cg02415014 | 0.425   | 0.714   | -0.289    | 2e-04            | LYNX1                 | Hypomethylated in FP vs FN |
| cg04098051 | 0.268   | 0.592   | -0.325    | 2e-04            | NA                    | Hypomethylated in FP vs FN |
| cg26098117 | 0.342   | 0.647   | -0.305    | 2e-04            | NA                    | Hypomethylated in FP vs FN |
| cg10704673 | 0.296   | 0.556   | -0.260    | 2e-04            | NA                    | Hypomethylated in FP vs FN |
| cg06239355 | 0.126   | 0.451   | -0.325    | 2e-04            | NA                    | Hypomethylated in FP vs FN |
| cg17929068 | 0.239   | 0.547   | -0.308    | 2e-04            | NKX2-8                | Hypomethylated in FP vs FN |
| cg03962019 | 0.317   | 0.568   | -0.251    | 2e-04            | NA                    | Hypomethylated in FP vs FN |
| cg24604417 | 0.426   | 0.738   | -0.311    | 2e-04            | NA                    | Hypomethylated in FP vs FN |
| cg27572072 | 0.397   | 0.662   | -0.265    | 2e-04            | NA                    | Hypomethylated in FP vs FN |
| cg00577449 | 0.289   | 0.654   | -0.365    | 2e-04            | NA                    | Hypomethylated in FP vs FN |
| cg15827031 | 0.176   | 0.513   | -0.337    | 2e-04            | NUP155                | Hypomethylated in FP vs FN |
| cg00301159 | 0.362   | 0.680   | -0.318    | 2e-04            | C3orf55               | Hypomethylated in FP vs FN |
| cg03953704 | 0.273   | 0.590   | -0.316    | 2e-04            | NA                    | Hypomethylated in FP vs FN |
| cg21579274 | 0.400   | 0.696   | -0.296    | 2e-04            | NA                    | Hypomethylated in FP vs FN |
| cg00961866 | 0.197   | 0.500   | -0.303    | 2e-04            | NA                    | Hypomethylated in FP vs FN |
| cg20264543 | 0.205   | 0.498   | -0.293    | 2e-04            | NA                    | Hypomethylated in FP vs FN |
| cg23743554 | 0.504   | 0.772   | -0.268    | 2e-04            | NA                    | Hypomethylated in FP vs FN |
| cg21749556 | 0.391   | 0.653   | -0.261    | 2e-04            | NA                    | Hypomethylated in FP vs FN |
| cg05774229 | 0.218   | 0.512   | -0.294    | 2e-04            | NA                    | Hypomethylated in FP vs FN |
| cg02639366 | 0.411   | 0.667   | -0.256    | 2e-04            | NA                    | Hypomethylated in FP vs FN |

### Supplementary Table 7 (continued)

| Probe      | FP.mean | FN.mean | Mean.diff | Adjusted.P.value | Promoter.related.gene | Category                   |
|------------|---------|---------|-----------|------------------|-----------------------|----------------------------|
| cg01576142 | 0.390   | 0.647   | -0.257    | 2e-04            | NA                    | Hypomethylated in FP vs FN |
| cg17825770 | 0.603   | 0.869   | -0.267    | 2e-04            | NA                    | Hypomethylated in FP vs FN |
| cg01844642 | 0.238   | 0.497   | -0.259    | 2e-04            | GPR62                 | Hypomethylated in FP vs FN |
| cg13758054 | 0.396   | 0.654   | -0.257    | 2e-04            | NA                    | Hypomethylated in FP vs FN |
| cg24011260 | 0.103   | 0.432   | -0.329    | 2e-04            | DPP6                  | Hypomethylated in FP vs FN |
| cg17557357 | 0.275   | 0.606   | -0.331    | 2e-04            | PCDHGB1               | Hypomethylated in FP vs FN |
| cg19354656 | 0.484   | 0.736   | -0.253    | 2e-04            | IGSF9                 | Hypomethylated in FP vs FN |
| cg08653021 | 0.523   | 0.810   | -0.287    | 2e-04            | NA                    | Hypomethylated in FP vs FN |
| cg03752741 | 0.302   | 0.552   | -0.251    | 2e-04            | NA                    | Hypomethylated in FP vs FN |
| cg13750214 | 0.310   | 0.671   | -0.360    | 2e-04            | NA                    | Hypomethylated in FP vs FN |
| cg22433285 | 0.076   | 0.357   | -0.281    | 2e-04            | NUP155                | Hypomethylated in FP vs FN |
| cg02402458 | 0.497   | 0.769   | -0.272    | 2e-04            | NA                    | Hypomethylated in FP vs FN |
| cg16342115 | 0.263   | 0.543   | -0.281    | 2e-04            | KLHL14                | Hypomethylated in FP vs FN |
| cg09494378 | 0.344   | 0.619   | -0.275    | 2e-04            | NA                    | Hypomethylated in FP vs FN |
| cg09393254 | 0.215   | 0.529   | -0.314    | 2e-04            | MCHR2                 | Hypomethylated in FP vs FN |
| cg17293161 | 0.236   | 0.519   | -0.283    | 2e-04            | NA                    | Hypomethylated in FP vs FN |
| cg00215182 | 0.276   | 0.536   | -0.259    | 2e-04            | C1QB                  | Hypomethylated in FP vs FN |
| cg05487589 | 0.203   | 0.513   | -0.311    | 2e-04            | NA                    | Hypomethylated in FP vs FN |
| cg02181594 | 0.326   | 0.603   | -0.277    | 2e-04            | NA                    | Hypomethylated in FP vs FN |
| cg19415383 | 0.386   | 0.662   | -0.276    | 2e-04            | DSG1                  | Hypomethylated in FP vs FN |
| cg00113117 | 0.470   | 0.744   | -0.274    | 2e-04            | NA                    | Hypomethylated in FP vs FN |
| cg22467594 | 0.363   | 0.652   | -0.290    | 2e-04            | NA                    | Hypomethylated in FP vs FN |
| cg05883874 | 0.098   | 0.410   | -0.312    | 2e-04            | NLRP14                | Hypomethylated in FP vs FN |
| cg05315633 | 0.334   | 0.638   | -0.305    | 2e-04            | NA                    | Hypomethylated in FP vs FN |
| cg05862393 | 0.530   | 0.787   | -0.257    | 2e-04            | SLC5A12               | Hypomethylated in FP vs FN |

### Supplementary Table 7 (continued)

| Probe      | FP.mean | FN.mean | Mean.diff | Adjusted.P.value | Promoter.related.gene | Category                   |
|------------|---------|---------|-----------|------------------|-----------------------|----------------------------|
| cg24930713 | 0.397   | 0.660   | -0.263    | 2e-04            | NA                    | Hypomethylated in FP vs FN |
| cg15300856 | 0.151   | 0.404   | -0.253    | 2e-04            | CBS                   | Hypomethylated in FP vs FN |
| cg21275967 | 0.255   | 0.612   | -0.357    | 2e-04            | ATF7IP                | Hypomethylated in FP vs FN |
| cg05209514 | 0.260   | 0.520   | -0.259    | 2e-04            | NA                    | Hypomethylated in FP vs FN |
| cg26000462 | 0.265   | 0.565   | -0.301    | 2e-04            | NA                    | Hypomethylated in FP vs FN |
| cg06138714 | 0.369   | 0.673   | -0.305    | 2e-04            | NA                    | Hypomethylated in FP vs FN |
| cg18514922 | 0.189   | 0.565   | -0.376    | 2e-04            | LY75                  | Hypomethylated in FP vs FN |
| cg02746725 | 0.094   | 0.379   | -0.284    | 2e-04            | NA                    | Hypomethylated in FP vs FN |
| cg06159181 | 0.374   | 0.628   | -0.254    | 2e-04            | NA                    | Hypomethylated in FP vs FN |
| cg15323871 | 0.471   | 0.732   | -0.261    | 2e-04            | C14orf38              | Hypomethylated in FP vs FN |
| cg21303745 | 0.471   | 0.739   | -0.268    | 2e-04            | NA                    | Hypomethylated in FP vs FN |
| cg07077013 | 0.347   | 0.678   | -0.330    | 2e-04            | NA                    | Hypomethylated in FP vs FN |
| cg21691166 | 0.200   | 0.546   | -0.345    | 2e-04            | NA                    | Hypomethylated in FP vs FN |
| cg16002818 | 0.210   | 0.489   | -0.279    | 2e-04            | BOLL                  | Hypomethylated in FP vs FN |
| cg01696784 | 0.229   | 0.517   | -0.287    | 2e-04            | NA                    | Hypomethylated in FP vs FN |
| cg04832177 | 0.299   | 0.623   | -0.324    | 2e-04            | NA                    | Hypomethylated in FP vs FN |
| cg03352173 | 0.420   | 0.681   | -0.261    | 2e-04            | SLC9A10               | Hypomethylated in FP vs FN |
| cg12593223 | 0.223   | 0.584   | -0.361    | 2e-04            | NA                    | Hypomethylated in FP vs FN |
| cg08641973 | 0.437   | 0.761   | -0.324    | 2e-04            | NA                    | Hypomethylated in FP vs FN |
| cg07755390 | 0.093   | 0.424   | -0.330    | 2e-04            | SLC12A8               | Hypomethylated in FP vs FN |
| cg18671554 | 0.412   | 0.672   | -0.260    | 2e-04            | NA                    | Hypomethylated in FP vs FN |
| cg11377136 | 0.392   | 0.728   | -0.336    | 2e-04            | PKDREJ                | Hypomethylated in FP vs FN |
| cg05644602 | 0.490   | 0.743   | -0.253    | 2e-04            | NA                    | Hypomethylated in FP vs FN |
| cg27071152 | 0.269   | 0.608   | -0.339    | 2e-04            | NA                    | Hypomethylated in FP vs FN |
| cg04830440 | 0.395   | 0.683   | -0.288    | 2e-04            | NA                    | Hypomethylated in FP vs FN |

### Supplementary Table 7 (continued)

| Probe      | FP.mean | FN.mean | Mean.diff | Adjusted.P.value | Promoter.related.gene | Category                   |
|------------|---------|---------|-----------|------------------|-----------------------|----------------------------|
| cg23093754 | 0.229   | 0.492   | -0.263    | 2e-04            | GNMT                  | Hypomethylated in FP vs FN |
| cg08205700 | 0.364   | 0.719   | -0.355    | 2e-04            | NA                    | Hypomethylated in FP vs FN |
| cg13245539 | 0.463   | 0.714   | -0.251    | 2e-04            | MIR33B                | Hypomethylated in FP vs FN |
| cg24185926 | 0.461   | 0.753   | -0.292    | 2e-04            | NA                    | Hypomethylated in FP vs FN |
| cg00602115 | 0.434   | 0.712   | -0.278    | 2e-04            | NA                    | Hypomethylated in FP vs FN |
| cg03346025 | 0.435   | 0.708   | -0.273    | 2e-04            | IL28B                 | Hypomethylated in FP vs FN |
| cg07777790 | 0.108   | 0.393   | -0.285    | 2e-04            | ACTA1                 | Hypomethylated in FP vs FN |
| cg14010366 | 0.143   | 0.418   | -0.275    | 2e-04            | RHEB                  | Hypomethylated in FP vs FN |
| cg04908380 | 0.248   | 0.587   | -0.339    | 2e-04            | NA                    | Hypomethylated in FP vs FN |
| cg09895325 | 0.442   | 0.742   | -0.300    | 2e-04            | SRRM1                 | Hypomethylated in FP vs FN |
| cg07800208 | 0.352   | 0.648   | -0.296    | 2e-04            | NA                    | Hypomethylated in FP vs FN |
| cg05922610 | 0.287   | 0.559   | -0.271    | 2e-04            | NA                    | Hypomethylated in FP vs FN |
| cg04324666 | 0.256   | 0.524   | -0.267    | 2e-04            | NA                    | Hypomethylated in FP vs FN |
| cg20933109 | 0.165   | 0.416   | -0.251    | 2e-04            | NA                    | Hypomethylated in FP vs FN |
| cg10310274 | 0.385   | 0.676   | -0.292    | 2e-04            | NA                    | Hypomethylated in FP vs FN |
| cg13079429 | 0.321   | 0.602   | -0.280    | 2e-04            | NA                    | Hypomethylated in FP vs FN |
| cg16398329 | 0.057   | 0.395   | -0.339    | 2e-04            | NA                    | Hypomethylated in FP vs FN |
| cg05928362 | 0.159   | 0.520   | -0.361    | 2e-04            | NA                    | Hypomethylated in FP vs FN |
| cg12119111 | 0.039   | 0.304   | -0.265    | 2e-04            | NHLRC1                | Hypomethylated in FP vs FN |
| cg08305436 | 0.217   | 0.597   | -0.380    | 2e-04            | NA                    | Hypomethylated in FP vs FN |
| cg09860781 | 0.162   | 0.419   | -0.257    | 2e-04            | NPM2                  | Hypomethylated in FP vs FN |
| cg04015361 | 0.360   | 0.644   | -0.284    | 2e-04            | NA                    | Hypomethylated in FP vs FN |
| cg09447895 | 0.432   | 0.693   | -0.261    | 2e-04            | NA                    | Hypomethylated in FP vs FN |
| cg16956501 | 0.264   | 0.622   | -0.358    | 2e-04            | PHF11                 | Hypomethylated in FP vs FN |
| cg02919799 | 0.160   | 0.422   | -0.262    | 2e-04            | NA                    | Hypomethylated in FP vs FN |

### Supplementary Table 7 (continued)

| Probe      | FP.mean | FN.mean | Mean.diff | Adjusted.P.value | Promoter.related.gene | Category                   |
|------------|---------|---------|-----------|------------------|-----------------------|----------------------------|
| cg02280348 | 0.478   | 0.747   | -0.269    | 2e-04            | NA                    | Hypomethylated in FP vs FN |
| cg15077070 | 0.313   | 0.609   | -0.297    | 2e-04            | IL1RL2                | Hypomethylated in FP vs FN |
| cg24504927 | 0.291   | 0.709   | -0.418    | 2e-04            | NA                    | Hypomethylated in FP vs FN |
| cg01778908 | 0.451   | 0.724   | -0.273    | 2e-04            | NA                    | Hypomethylated in FP vs FN |
| cg24914139 | 0.516   | 0.769   | -0.253    | 2e-04            | NA                    | Hypomethylated in FP vs FN |
| cg10818657 | 0.370   | 0.639   | -0.269    | 2e-04            | NA                    | Hypomethylated in FP vs FN |
| cg08587845 | 0.189   | 0.469   | -0.280    | 2e-04            | NEUROG1               | Hypomethylated in FP vs FN |
| cg10632765 | 0.518   | 0.800   | -0.282    | 2e-04            | NA                    | Hypomethylated in FP vs FN |
| cg13381984 | 0.404   | 0.732   | -0.329    | 2e-04            | LEP                   | Hypomethylated in FP vs FN |
| cg21869219 | 0.496   | 0.767   | -0.271    | 2e-04            | NA                    | Hypomethylated in FP vs FN |
| cg22221025 | 0.318   | 0.625   | -0.307    | 2e-04            | NA                    | Hypomethylated in FP vs FN |
| cg18589504 | 0.452   | 0.721   | -0.269    | 2e-04            | NA                    | Hypomethylated in FP vs FN |
| cg18450582 | 0.488   | 0.769   | -0.282    | 2e-04            | NA                    | Hypomethylated in FP vs FN |
| cg08303612 | 0.132   | 0.389   | -0.256    | 2e-04            | NA                    | Hypomethylated in FP vs FN |
| cg00501242 | 0.299   | 0.550   | -0.251    | 2e-04            | NA                    | Hypomethylated in FP vs FN |
| cg21658372 | 0.594   | 0.852   | -0.258    | 2e-04            | NTN5                  | Hypomethylated in FP vs FN |
| cg00650176 | 0.189   | 0.476   | -0.287    | 2e-04            | C9orf135              | Hypomethylated in FP vs FN |
| cg18093120 | 0.403   | 0.687   | -0.284    | 2e-04            | MLC1                  | Hypomethylated in FP vs FN |
| cg17673691 | 0.429   | 0.695   | -0.265    | 2e-04            | NA                    | Hypomethylated in FP vs FN |
| cg12914733 | 0.371   | 0.659   | -0.288    | 2e-04            | NA                    | Hypomethylated in FP vs FN |
| cg15769343 | 0.362   | 0.633   | -0.271    | 2e-04            | NA                    | Hypomethylated in FP vs FN |
| cg09973284 | 0.300   | 0.662   | -0.363    | 2e-04            | NA                    | Hypomethylated in FP vs FN |
| cg24378048 | 0.141   | 0.460   | -0.319    | 2e-04            | SWAP70                | Hypomethylated in FP vs FN |
| cg23560159 | 0.179   | 0.454   | -0.275    | 2e-04            | NA                    | Hypomethylated in FP vs FN |
| cg19585597 | 0.249   | 0.583   | -0.335    | 2e-04            | LOC134466             | Hypomethylated in FP vs FN |

### Supplementary Table 7 (continued)

| Probe      | FP.mean | FN.mean | Mean.diff | Adjusted.P.value | Promoter.related.gene | Category                   |
|------------|---------|---------|-----------|------------------|-----------------------|----------------------------|
| cg20337093 | 0.257   | 0.522   | -0.265    | 2e-04            | KILLIN                | Hypomethylated in FP vs FN |
| cg12286516 | 0.156   | 0.414   | -0.258    | 2e-04            | NA                    | Hypomethylated in FP vs FN |
| cg16412460 | 0.464   | 0.734   | -0.270    | 2e-04            | NA                    | Hypomethylated in FP vs FN |
| cg00735329 | 0.309   | 0.577   | -0.267    | 2e-04            | NA                    | Hypomethylated in FP vs FN |
| cg09962377 | 0.462   | 0.738   | -0.276    | 2e-04            | NA                    | Hypomethylated in FP vs FN |
| cg18104148 | 0.483   | 0.743   | -0.260    | 2e-04            | NA                    | Hypomethylated in FP vs FN |
| cg18009000 | 0.406   | 0.660   | -0.254    | 2e-04            | H2AFY2                | Hypomethylated in FP vs FN |
| cg08101303 | 0.175   | 0.445   | -0.270    | 2e-04            | NA                    | Hypomethylated in FP vs FN |
| cg02827007 | 0.377   | 0.651   | -0.275    | 2e-04            | NA                    | Hypomethylated in FP vs FN |
| cg05767421 | 0.373   | 0.634   | -0.261    | 2e-04            | NA                    | Hypomethylated in FP vs FN |
| cg16052975 | 0.428   | 0.744   | -0.316    | 2e-04            | NA                    | Hypomethylated in FP vs FN |
| cg20310894 | 0.247   | 0.601   | -0.353    | 2e-04            | NA                    | Hypomethylated in FP vs FN |
| cg18839750 | 0.428   | 0.683   | -0.255    | 2e-04            | PCDHGA3               | Hypomethylated in FP vs FN |
| cg15135047 | 0.166   | 0.473   | -0.308    | 2e-04            | NA                    | Hypomethylated in FP vs FN |
| cg25416153 | 0.122   | 0.505   | -0.383    | 2e-04            | NA                    | Hypomethylated in FP vs FN |
| cg00576108 | 0.383   | 0.650   | -0.267    | 2e-04            | NA                    | Hypomethylated in FP vs FN |
| cg02363969 | 0.359   | 0.621   | -0.261    | 2e-04            | SBK2                  | Hypomethylated in FP vs FN |
| cg11796442 | 0.508   | 0.787   | -0.280    | 2e-04            | NA                    | Hypomethylated in FP vs FN |
| cg17701035 | 0.387   | 0.638   | -0.251    | 2e-04            | CLEC17A               | Hypomethylated in FP vs FN |
| cg03374820 | 0.339   | 0.640   | -0.301    | 2e-04            | NA                    | Hypomethylated in FP vs FN |
| cg26551026 | 0.336   | 0.625   | -0.288    | 2e-04            | NA                    | Hypomethylated in FP vs FN |
| cg04680494 | 0.361   | 0.681   | -0.320    | 2e-04            | KIF25                 | Hypomethylated in FP vs FN |
| cg03468463 | 0.514   | 0.789   | -0.275    | 2e-04            | NA                    | Hypomethylated in FP vs FN |
| cg17827148 | 0.401   | 0.671   | -0.270    | 2e-04            | NA                    | Hypomethylated in FP vs FN |
| cg25935911 | 0.231   | 0.505   | -0.274    | 2e-04            | DBC1                  | Hypomethylated in FP vs FN |



### Supplementary Table 7 (continued)

| Probe      | FP.mean | FN.mean | Mean.diff | Adjusted.P.value | Promoter.related.gene | Category                   |
|------------|---------|---------|-----------|------------------|-----------------------|----------------------------|
| cg12651953 | 0.489   | 0.756   | -0.267    | 2e-04            | NA                    | Hypomethylated in FP vs FN |
| cg02096790 | 0.530   | 0.780   | -0.250    | 2e-04            | NA                    | Hypomethylated in FP vs FN |
| cg22490861 | 0.294   | 0.610   | -0.316    | 2e-04            | HEBP1                 | Hypomethylated in FP vs FN |
| cg03521812 | 0.349   | 0.628   | -0.279    | 2e-04            | NA                    | Hypomethylated in FP vs FN |
| cg06261937 | 0.138   | 0.434   | -0.296    | 2e-04            | DCC                   | Hypomethylated in FP vs FN |
| cg07582845 | 0.189   | 0.560   | -0.371    | 2e-04            | TPD52L1               | Hypomethylated in FP vs FN |
| cg08781728 | 0.318   | 0.653   | -0.335    | 2e-04            | NA                    | Hypomethylated in FP vs FN |
| cg10415314 | 0.445   | 0.713   | -0.267    | 2e-04            | NA                    | Hypomethylated in FP vs FN |
| cg16758598 | 0.340   | 0.622   | -0.282    | 2e-04            | NA                    | Hypomethylated in FP vs FN |
| cg19818998 | 0.173   | 0.523   | -0.349    | 2e-04            | NA                    | Hypomethylated in FP vs FN |
| cg09157302 | 0.327   | 0.661   | -0.334    | 2e-04            | SLC34A2               | Hypomethylated in FP vs FN |
| cg08036309 | 0.247   | 0.539   | -0.291    | 2e-04            | NA                    | Hypomethylated in FP vs FN |
| cg22356726 | 0.398   | 0.732   | -0.335    | 2e-04            | NA                    | Hypomethylated in FP vs FN |
| cg06311422 | 0.205   | 0.486   | -0.281    | 2e-04            | NA                    | Hypomethylated in FP vs FN |
| cg09095222 | 0.260   | 0.560   | -0.301    | 2e-04            | NA                    | Hypomethylated in FP vs FN |
| cg10906284 | 0.143   | 0.453   | -0.311    | 2e-04            | AVPR1A                | Hypomethylated in FP vs FN |
| cg13632752 | 0.502   | 0.767   | -0.265    | 2e-04            | NA                    | Hypomethylated in FP vs FN |
| cg17740401 | 0.308   | 0.558   | -0.250    | 2e-04            | NA                    | Hypomethylated in FP vs FN |
| cg23416002 | 0.294   | 0.586   | -0.291    | 2e-04            | NA                    | Hypomethylated in FP vs FN |
| cg06610484 | 0.177   | 0.497   | -0.320    | 2e-04            | MCHR2                 | Hypomethylated in FP vs FN |
| cg20959780 | 0.165   | 0.439   | -0.274    | 2e-04            | NA                    | Hypomethylated in FP vs FN |
| cg08479073 | 0.279   | 0.555   | -0.276    | 2e-04            | IL20                  | Hypomethylated in FP vs FN |
| cg00018606 | 0.309   | 0.610   | -0.301    | 2e-04            | CRYGD                 | Hypomethylated in FP vs FN |
| cg12517027 | 0.409   | 0.695   | -0.286    | 2e-04            | NA                    | Hypomethylated in FP vs FN |
| cg03652525 | 0.274   | 0.578   | -0.304    | 2e-04            | NA                    | Hypomethylated in FP vs FN |

### Supplementary Table 7 (continued)

| Probe      | FP.mean | FN.mean | Mean.diff | Adjusted.P.value | Promoter.related.gene | Category                   |
|------------|---------|---------|-----------|------------------|-----------------------|----------------------------|
| cg17103088 | 0.524   | 0.779   | -0.255    | 2e-04            | NA                    | Hypomethylated in FP vs FN |
| cg09783457 | 0.375   | 0.693   | -0.318    | 2e-04            | NA                    | Hypomethylated in FP vs FN |
| cg12590430 | 0.349   | 0.676   | -0.327    | 2e-04            | NA                    | Hypomethylated in FP vs FN |
| cg22946147 | 0.273   | 0.569   | -0.296    | 2e-04            | MGC26647              | Hypomethylated in FP vs FN |
| cg07694025 | 0.191   | 0.503   | -0.312    | 2e-04            | NA                    | Hypomethylated in FP vs FN |
| cg26128079 | 0.119   | 0.369   | -0.250    | 2e-04            | NA                    | Hypomethylated in FP vs FN |
| cg15718663 | 0.403   | 0.681   | -0.278    | 2e-04            | OSBPL5                | Hypomethylated in FP vs FN |
| cg14602234 | 0.286   | 0.566   | -0.279    | 2e-04            | NA                    | Hypomethylated in FP vs FN |
| cg12092579 | 0.416   | 0.733   | -0.317    | 2e-04            | NA                    | Hypomethylated in FP vs FN |
| cg08946854 | 0.306   | 0.585   | -0.279    | 2e-04            | NA                    | Hypomethylated in FP vs FN |
| cg22796507 | 0.120   | 0.436   | -0.316    | 2e-04            | FOXE3                 | Hypomethylated in FP vs FN |
| cg23690166 | 0.102   | 0.465   | -0.363    | 2e-04            | MIR196A1              | Hypomethylated in FP vs FN |
| cg22768487 | 0.286   | 0.591   | -0.305    | 2e-04            | NA                    | Hypomethylated in FP vs FN |
| cg12911256 | 0.287   | 0.651   | -0.364    | 2e-04            | RNF207                | Hypomethylated in FP vs FN |
| cg23924306 | 0.415   | 0.696   | -0.281    | 2e-04            | NA                    | Hypomethylated in FP vs FN |
| cg03467027 | 0.118   | 0.415   | -0.297    | 2e-04            | C4orf37               | Hypomethylated in FP vs FN |
| cg23800435 | 0.423   | 0.697   | -0.274    | 2e-04            | C1orf210              | Hypomethylated in FP vs FN |
| cg08608780 | 0.364   | 0.651   | -0.287    | 2e-04            | NA                    | Hypomethylated in FP vs FN |
| cg05215481 | 0.356   | 0.631   | -0.275    | 2e-04            | NA                    | Hypomethylated in FP vs FN |
| cg25320388 | 0.275   | 0.558   | -0.283    | 2e-04            | NA                    | Hypomethylated in FP vs FN |
| cg01523712 | 0.462   | 0.729   | -0.268    | 2e-04            | NA                    | Hypomethylated in FP vs FN |
| cg17342064 | 0.165   | 0.520   | -0.355    | 2e-04            | NA                    | Hypomethylated in FP vs FN |
| cg09680447 | 0.252   | 0.541   | -0.289    | 2e-04            | NA                    | Hypomethylated in FP vs FN |
| cg18018990 | 0.298   | 0.572   | -0.274    | 2e-04            | NA                    | Hypomethylated in FP vs FN |
| cg20893579 | 0.347   | 0.606   | -0.259    | 2e-04            | NA                    | Hypomethylated in FP vs FN |

### Supplementary Table 7 (continued)

| Probe      | FP.mean | FN.mean | Mean.diff | Adjusted.P.value | Promoter.related.gene | Category                   |
|------------|---------|---------|-----------|------------------|-----------------------|----------------------------|
| cg07639489 | 0.266   | 0.574   | -0.308    | 2e-04            | NA                    | Hypomethylated in FP vs FN |
| cg07709358 | 0.383   | 0.640   | -0.257    | 2e-04            | NA                    | Hypomethylated in FP vs FN |
| cg18378453 | 0.101   | 0.453   | -0.352    | 2e-04            | NA                    | Hypomethylated in FP vs FN |
| cg17083494 | 0.430   | 0.710   | -0.279    | 2e-04            | DLX5                  | Hypomethylated in FP vs FN |
| cg08269275 | 0.449   | 0.714   | -0.264    | 2e-04            | NA                    | Hypomethylated in FP vs FN |
| cg02759903 | 0.447   | 0.707   | -0.260    | 2e-04            | NA                    | Hypomethylated in FP vs FN |
| cg10812717 | 0.410   | 0.686   | -0.276    | 2e-04            | ERMN                  | Hypomethylated in FP vs FN |
| cg08415391 | 0.507   | 0.787   | -0.280    | 2e-04            | NA                    | Hypomethylated in FP vs FN |
| cg15036160 | 0.473   | 0.770   | -0.297    | 2e-04            | NA                    | Hypomethylated in FP vs FN |
| cg02530375 | 0.155   | 0.436   | -0.281    | 2e-04            | NA                    | Hypomethylated in FP vs FN |
| cg15168727 | 0.178   | 0.526   | -0.348    | 2e-04            | NA                    | Hypomethylated in FP vs FN |
| cg10969178 | 0.459   | 0.725   | -0.267    | 2e-04            | NA                    | Hypomethylated in FP vs FN |
| cg23509344 | 0.141   | 0.412   | -0.271    | 2e-04            | NA                    | Hypomethylated in FP vs FN |
| cg07965110 | 0.272   | 0.541   | -0.269    | 2e-04            | NA                    | Hypomethylated in FP vs FN |
| cg19004771 | 0.498   | 0.753   | -0.255    | 2e-04            | NA                    | Hypomethylated in FP vs FN |
| cg21585138 | 0.321   | 0.608   | -0.286    | 2e-04            | NA                    | Hypomethylated in FP vs FN |
| cg22558061 | 0.398   | 0.691   | -0.292    | 2e-04            | NA                    | Hypomethylated in FP vs FN |
| cg26160626 | 0.171   | 0.435   | -0.264    | 2e-04            | NA                    | Hypomethylated in FP vs FN |
| cg25082959 | 0.069   | 0.374   | -0.304    | 2e-04            | NA                    | Hypomethylated in FP vs FN |
| cg04620015 | 0.161   | 0.466   | -0.305    | 2e-04            | FLJ11235              | Hypomethylated in FP vs FN |
| cg23494015 | 0.277   | 0.586   | -0.309    | 2e-04            | C14orf38              | Hypomethylated in FP vs FN |
| cg27305383 | 0.317   | 0.583   | -0.266    | 2e-04            | HOPX                  | Hypomethylated in FP vs FN |
| cg05749855 | 0.568   | 0.841   | -0.273    | 2e-04            | NA                    | Hypomethylated in FP vs FN |
| cg16537367 | 0.384   | 0.669   | -0.285    | 2e-04            | NA                    | Hypomethylated in FP vs FN |
| cg16545749 | 0.546   | 0.826   | -0.280    | 2e-04            | NA                    | Hypomethylated in FP vs FN |

**Supplementary Table 7 (continued)**

| Probe      | FP.mean | FN.mean | Mean.diff | Adjusted.P.value | Promoter.related.gene | Category                   |
|------------|---------|---------|-----------|------------------|-----------------------|----------------------------|
| cg13839563 | 0.352   | 0.662   | -0.311    | 2e-04            | NA                    | Hypomethylated in FP vs FN |
| cg20377305 | 0.177   | 0.554   | -0.377    | 2e-04            | NA                    | Hypomethylated in FP vs FN |
| cg11347582 | 0.547   | 0.850   | -0.303    | 2e-04            | NA                    | Hypomethylated in FP vs FN |
| cg07499553 | 0.394   | 0.679   | -0.284    | 2e-04            | LOC134466             | Hypomethylated in FP vs FN |
| cg02682520 | 0.257   | 0.530   | -0.273    | 2e-04            | NA                    | Hypomethylated in FP vs FN |
| cg11826726 | 0.293   | 0.601   | -0.308    | 2e-04            | NA                    | Hypomethylated in FP vs FN |
| cg01743370 | 0.106   | 0.435   | -0.329    | 2e-04            | NA                    | Hypomethylated in FP vs FN |
| cg09233651 | 0.456   | 0.739   | -0.284    | 2e-04            | NA                    | Hypomethylated in FP vs FN |
| cg08508368 | 0.219   | 0.503   | -0.284    | 2e-04            | CA13                  | Hypomethylated in FP vs FN |
| cg18286501 | 0.261   | 0.567   | -0.306    | 2e-04            | TMEM26                | Hypomethylated in FP vs FN |
| cg05854601 | 0.456   | 0.734   | -0.278    | 2e-04            | NA                    | Hypomethylated in FP vs FN |
| cg10673134 | 0.486   | 0.745   | -0.259    | 2e-04            | NA                    | Hypomethylated in FP vs FN |
| cg02741440 | 0.175   | 0.468   | -0.293    | 2e-04            | NA                    | Hypomethylated in FP vs FN |
| cg12158488 | 0.258   | 0.510   | -0.253    | 2e-04            | NA                    | Hypomethylated in FP vs FN |
| cg06080026 | 0.433   | 0.686   | -0.253    | 2e-04            | NA                    | Hypomethylated in FP vs FN |
| cg22651812 | 0.387   | 0.644   | -0.257    | 2e-04            | NA                    | Hypomethylated in FP vs FN |
| cg03349953 | 0.391   | 0.651   | -0.259    | 2e-04            | PCDHB5                | Hypomethylated in FP vs FN |
| cg02980621 | 0.506   | 0.784   | -0.278    | 2e-04            | NA                    | Hypomethylated in FP vs FN |
| cg18950778 | 0.300   | 0.639   | -0.339    | 2e-04            | NA                    | Hypomethylated in FP vs FN |
| cg04058281 | 0.365   | 0.643   | -0.279    | 2e-04            | NA                    | Hypomethylated in FP vs FN |
| cg13189671 | 0.563   | 0.835   | -0.272    | 2e-04            | NA                    | Hypomethylated in FP vs FN |
| cg06783102 | 0.502   | 0.758   | -0.256    | 2e-04            | NA                    | Hypomethylated in FP vs FN |
| cg10514097 | 0.109   | 0.409   | -0.300    | 2e-04            | FOXF1                 | Hypomethylated in FP vs FN |
| cg07513768 | 0.291   | 0.588   | -0.297    | 2e-04            | RPLP1                 | Hypomethylated in FP vs FN |
| cg13186884 | 0.225   | 0.556   | -0.331    | 2e-04            | NA                    | Hypomethylated in FP vs FN |

### Supplementary Table 7 (continued)

| Probe      | FP.mean | FN.mean | Mean.diff | Adjusted.P.value | Promoter.related.gene | Category                   |
|------------|---------|---------|-----------|------------------|-----------------------|----------------------------|
| cg02589568 | 0.445   | 0.697   | -0.253    | 2e-04            | NA                    | Hypomethylated in FP vs FN |
| cg14523847 | 0.251   | 0.586   | -0.335    | 2e-04            | DPP6                  | Hypomethylated in FP vs FN |
| cg25504884 | 0.429   | 0.707   | -0.278    | 2e-04            | NA                    | Hypomethylated in FP vs FN |
| cg10659886 | 0.179   | 0.534   | -0.355    | 2e-04            | ZSCAN18               | Hypomethylated in FP vs FN |
| cg19789919 | 0.359   | 0.670   | -0.311    | 2e-04            | ATF7IP                | Hypomethylated in FP vs FN |
| cg17216080 | 0.363   | 0.624   | -0.261    | 2e-04            | NA                    | Hypomethylated in FP vs FN |
| cg03638905 | 0.270   | 0.599   | -0.329    | 2e-04            | NA                    | Hypomethylated in FP vs FN |
| cg04006061 | 0.415   | 0.732   | -0.318    | 2e-04            | NA                    | Hypomethylated in FP vs FN |
| cg26337868 | 0.484   | 0.750   | -0.266    | 2e-04            | RND3                  | Hypomethylated in FP vs FN |
| cg21379458 | 0.469   | 0.736   | -0.267    | 2e-04            | NA                    | Hypomethylated in FP vs FN |
| cg14162906 | 0.368   | 0.619   | -0.251    | 2e-04            | TMEM222               | Hypomethylated in FP vs FN |
| cg04190875 | 0.342   | 0.636   | -0.294    | 2e-04            | NA                    | Hypomethylated in FP vs FN |
| cg23004160 | 0.305   | 0.668   | -0.363    | 2e-04            | NA                    | Hypomethylated in FP vs FN |
| cg02147681 | 0.307   | 0.668   | -0.361    | 2e-04            | NA                    | Hypomethylated in FP vs FN |
| cg24576535 | 0.377   | 0.716   | -0.339    | 2e-04            | NA                    | Hypomethylated in FP vs FN |
| cg14851608 | 0.386   | 0.646   | -0.260    | 2e-04            | ZBTB40                | Hypomethylated in FP vs FN |
| cg11902408 | 0.267   | 0.540   | -0.273    | 2e-04            | FGD5                  | Hypomethylated in FP vs FN |
| cg24426405 | 0.297   | 0.567   | -0.270    | 2e-04            | AGR2                  | Hypomethylated in FP vs FN |
| cg15541583 | 0.361   | 0.612   | -0.251    | 2e-04            | SLC9A10               | Hypomethylated in FP vs FN |
| cg04794141 | 0.237   | 0.504   | -0.267    | 2e-04            | NA                    | Hypomethylated in FP vs FN |
| cg06159353 | 0.386   | 0.686   | -0.300    | 2e-04            | NA                    | Hypomethylated in FP vs FN |
| cg22169866 | 0.465   | 0.721   | -0.257    | 2e-04            | NA                    | Hypomethylated in FP vs FN |
| cg24922129 | 0.312   | 0.650   | -0.338    | 2e-04            | NA                    | Hypomethylated in FP vs FN |
| cg27083484 | 0.416   | 0.699   | -0.283    | 2e-04            | NA                    | Hypomethylated in FP vs FN |
| cg16546376 | 0.404   | 0.690   | -0.286    | 2e-04            | NA                    | Hypomethylated in FP vs FN |

**Supplementary Table 7 (continued)**

| <b>Probe</b> | <b>FP.mean</b> | <b>FN.mean</b> | <b>Mean.diff</b> | <b>Adjusted.P.value</b> | <b>Promoter.related.gene</b> | <b>Category</b>            |
|--------------|----------------|----------------|------------------|-------------------------|------------------------------|----------------------------|
| cg19916740   | 0.207          | 0.506          | -0.299           | 2e-04                   | NA                           | Hypomethylated in FP vs FN |
| cg24945701   | 0.385          | 0.717          | -0.332           | 2e-04                   | NA                           | Hypomethylated in FP vs FN |
| cg11227598   | 0.465          | 0.722          | -0.257           | 2e-04                   | NA                           | Hypomethylated in FP vs FN |
| cg11782208   | 0.464          | 0.723          | -0.260           | 2e-04                   | C1orf170                     | Hypomethylated in FP vs FN |
| cg14027333   | 0.351          | 0.652          | -0.301           | 2e-04                   | NA                           | Hypomethylated in FP vs FN |
| cg15698299   | 0.329          | 0.595          | -0.266           | 2e-04                   | NA                           | Hypomethylated in FP vs FN |
| cg05483176   | 0.334          | 0.626          | -0.292           | 2e-04                   | NA                           | Hypomethylated in FP vs FN |
| cg17845732   | 0.404          | 0.666          | -0.262           | 2e-04                   | NA                           | Hypomethylated in FP vs FN |
| cg05757907   | 0.352          | 0.630          | -0.278           | 2e-04                   | NA                           | Hypomethylated in FP vs FN |
| cg04547002   | 0.313          | 0.611          | -0.298           | 2e-04                   | NA                           | Hypomethylated in FP vs FN |
| cg13448978   | 0.438          | 0.766          | -0.327           | 2e-04                   | FGR                          | Hypomethylated in FP vs FN |
| cg26292150   | 0.317          | 0.608          | -0.291           | 2e-04                   | NA                           | Hypomethylated in FP vs FN |
| cg22489153   | 0.161          | 0.483          | -0.322           | 2e-04                   | NA                           | Hypomethylated in FP vs FN |
| cg04751558   | 0.279          | 0.584          | -0.305           | 2e-04                   | NA                           | Hypomethylated in FP vs FN |
| cg26860613   | 0.297          | 0.553          | -0.256           | 2e-04                   | NA                           | Hypomethylated in FP vs FN |
| cg03677056   | 0.265          | 0.545          | -0.279           | 2e-04                   | NA                           | Hypomethylated in FP vs FN |
| cg22316614   | 0.338          | 0.707          | -0.369           | 2e-04                   | NA                           | Hypomethylated in FP vs FN |
| cg12141218   | 0.249          | 0.507          | -0.258           | 2e-04                   | NA                           | Hypomethylated in FP vs FN |
| cg06646708   | 0.559          | 0.811          | -0.252           | 2e-04                   | NHLRC1                       | Hypomethylated in FP vs FN |
| cg19632236   | 0.288          | 0.545          | -0.257           | 2e-04                   | KIAA0947                     | Hypomethylated in FP vs FN |
| cg14826683   | 0.409          | 0.682          | -0.273           | 2e-04                   | SPRR2D                       | Hypomethylated in FP vs FN |
| cg23526504   | 0.370          | 0.621          | -0.252           | 2e-04                   | NA                           | Hypomethylated in FP vs FN |
| cg11074070   | 0.384          | 0.681          | -0.297           | 2e-04                   | NA                           | Hypomethylated in FP vs FN |
| cg01211763   | 0.417          | 0.694          | -0.277           | 2e-04                   | NA                           | Hypomethylated in FP vs FN |
| cg08737836   | 0.198          | 0.452          | -0.254           | 2e-04                   | NA                           | Hypomethylated in FP vs FN |

### Supplementary Table 7 (continued)

| Probe      | FP.mean | FN.mean | Mean.diff | Adjusted.P.value | Promoter.related.gene | Category                   |
|------------|---------|---------|-----------|------------------|-----------------------|----------------------------|
| cg09360044 | 0.352   | 0.638   | -0.286    | 2e-04            | NA                    | Hypomethylated in FP vs FN |
| cg07287724 | 0.217   | 0.505   | -0.289    | 2e-04            | NA                    | Hypomethylated in FP vs FN |
| cg06822340 | 0.476   | 0.731   | -0.255    | 2e-04            | NA                    | Hypomethylated in FP vs FN |
| cg03642472 | 0.402   | 0.672   | -0.270    | 2e-04            | NA                    | Hypomethylated in FP vs FN |
| cg23843705 | 0.288   | 0.550   | -0.262    | 2e-04            | NA                    | Hypomethylated in FP vs FN |
| cg03839794 | 0.352   | 0.707   | -0.355    | 2e-04            | NA                    | Hypomethylated in FP vs FN |
| cg02402024 | 0.231   | 0.500   | -0.270    | 2e-04            | NA                    | Hypomethylated in FP vs FN |
| cg00059246 | 0.376   | 0.638   | -0.261    | 2e-04            | NA                    | Hypomethylated in FP vs FN |
| cg22531904 | 0.105   | 0.407   | -0.302    | 2e-04            | NA                    | Hypomethylated in FP vs FN |
| cg16320249 | 0.202   | 0.520   | -0.318    | 2e-04            | NA                    | Hypomethylated in FP vs FN |
| cg03241649 | 0.088   | 0.344   | -0.256    | 2e-04            | NA                    | Hypomethylated in FP vs FN |
| cg03064914 | 0.392   | 0.647   | -0.255    | 2e-04            | NA                    | Hypomethylated in FP vs FN |
| cg26579578 | 0.574   | 0.882   | -0.308    | 2e-04            | NA                    | Hypomethylated in FP vs FN |
| cg01497613 | 0.151   | 0.445   | -0.294    | 2e-04            | NA                    | Hypomethylated in FP vs FN |
| cg02280532 | 0.197   | 0.616   | -0.419    | 2e-04            | LY75                  | Hypomethylated in FP vs FN |
| cg13678973 | 0.108   | 0.460   | -0.353    | 2e-04            | NA                    | Hypomethylated in FP vs FN |
| cg02861260 | 0.533   | 0.800   | -0.267    | 2e-04            | NA                    | Hypomethylated in FP vs FN |
| cg22505086 | 0.207   | 0.459   | -0.252    | 2e-04            | NA                    | Hypomethylated in FP vs FN |
| cg08484506 | 0.392   | 0.666   | -0.274    | 2e-04            | NA                    | Hypomethylated in FP vs FN |
| cg03164761 | 0.125   | 0.458   | -0.333    | 2e-04            | NA                    | Hypomethylated in FP vs FN |
| cg10160807 | 0.339   | 0.602   | -0.262    | 2e-04            | NA                    | Hypomethylated in FP vs FN |
| cg20055426 | 0.217   | 0.531   | -0.314    | 2e-04            | NA                    | Hypomethylated in FP vs FN |
| cg24914848 | 0.424   | 0.695   | -0.272    | 2e-04            | NA                    | Hypomethylated in FP vs FN |
| cg20690922 | 0.338   | 0.607   | -0.268    | 2e-04            | RHBDF2                | Hypomethylated in FP vs FN |
| cg03671191 | 0.041   | 0.345   | -0.304    | 2e-04            | NA                    | Hypomethylated in FP vs FN |

### Supplementary Table 7 (continued)

| Probe      | FP.mean | FN.mean | Mean.diff | Adjusted.P.value | Promoter.related.gene | Category                   |
|------------|---------|---------|-----------|------------------|-----------------------|----------------------------|
| cg27514608 | 0.254   | 0.539   | -0.285    | 2e-04            | PPARGC1A              | Hypomethylated in FP vs FN |
| cg11717507 | 0.298   | 0.600   | -0.302    | 2e-04            | NA                    | Hypomethylated in FP vs FN |
| cg13195955 | 0.286   | 0.541   | -0.255    | 2e-04            | NA                    | Hypomethylated in FP vs FN |
| cg10593028 | 0.453   | 0.706   | -0.253    | 2e-04            | EXPH5                 | Hypomethylated in FP vs FN |
| cg10894441 | 0.134   | 0.458   | -0.324    | 2e-04            | C11orf93              | Hypomethylated in FP vs FN |
| cg12899614 | 0.560   | 0.813   | -0.254    | 2e-04            | NA                    | Hypomethylated in FP vs FN |
| cg08552042 | 0.160   | 0.484   | -0.323    | 2e-04            | MMP15                 | Hypomethylated in FP vs FN |
| cg07046047 | 0.358   | 0.670   | -0.312    | 2e-04            | NA                    | Hypomethylated in FP vs FN |
| cg17683775 | 0.460   | 0.713   | -0.253    | 2e-04            | PTGES                 | Hypomethylated in FP vs FN |
| cg05062323 | 0.136   | 0.394   | -0.257    | 2e-04            | NA                    | Hypomethylated in FP vs FN |
| cg05658887 | 0.118   | 0.407   | -0.289    | 2e-04            | NA                    | Hypomethylated in FP vs FN |
| cg11594811 | 0.363   | 0.621   | -0.257    | 2e-04            | NA                    | Hypomethylated in FP vs FN |
| cg15652178 | 0.177   | 0.475   | -0.298    | 2e-04            | NA                    | Hypomethylated in FP vs FN |
| cg20531550 | 0.365   | 0.666   | -0.302    | 2e-04            | KCP                   | Hypomethylated in FP vs FN |
| cg10552106 | 0.320   | 0.619   | -0.300    | 2e-04            | IGSF10                | Hypomethylated in FP vs FN |
| cg16812626 | 0.454   | 0.717   | -0.263    | 2e-04            | NA                    | Hypomethylated in FP vs FN |
| cg03943115 | 0.232   | 0.523   | -0.292    | 2e-04            | SPRR2D                | Hypomethylated in FP vs FN |
| cg12046602 | 0.303   | 0.637   | -0.333    | 2e-04            | NA                    | Hypomethylated in FP vs FN |
| cg24792289 | 0.243   | 0.616   | -0.372    | 2e-04            | NA                    | Hypomethylated in FP vs FN |
| cg01433654 | 0.263   | 0.513   | -0.251    | 2e-04            | NA                    | Hypomethylated in FP vs FN |
| cg15628917 | 0.202   | 0.534   | -0.333    | 2e-04            | C1orf87               | Hypomethylated in FP vs FN |
| cg18255353 | 0.233   | 0.612   | -0.379    | 2e-04            | NA                    | Hypomethylated in FP vs FN |
| cg01711746 | 0.189   | 0.479   | -0.289    | 2e-04            | NA                    | Hypomethylated in FP vs FN |
| cg11267955 | 0.146   | 0.491   | -0.345    | 2e-04            | SLCO4C1               | Hypomethylated in FP vs FN |
| cg10132917 | 0.430   | 0.698   | -0.268    | 2e-04            | AQP1                  | Hypomethylated in FP vs FN |



### Supplementary Table 7 (continued)

| Probe      | FP.mean | FN.mean | Mean.diff | Adjusted.P.value | Promoter.related.gene | Category                   |
|------------|---------|---------|-----------|------------------|-----------------------|----------------------------|
| cg11257429 | 0.196   | 0.484   | -0.288    | 2e-04            | NA                    | Hypomethylated in FP vs FN |
| cg26717009 | 0.215   | 0.510   | -0.294    | 2e-04            | GJA3                  | Hypomethylated in FP vs FN |
| cg02245998 | 0.251   | 0.510   | -0.259    | 2e-04            | NA                    | Hypomethylated in FP vs FN |
| cg23536473 | 0.295   | 0.636   | -0.341    | 2e-04            | FERD3L                | Hypomethylated in FP vs FN |
| cg11189177 | 0.407   | 0.657   | -0.250    | 3e-04            | NA                    | Hypomethylated in FP vs FN |
| cg20556988 | 0.419   | 0.698   | -0.279    | 3e-04            | CCL1                  | Hypomethylated in FP vs FN |
| cg08370430 | 0.493   | 0.746   | -0.253    | 3e-04            | NA                    | Hypomethylated in FP vs FN |
| cg18099070 | 0.380   | 0.688   | -0.308    | 3e-04            | NA                    | Hypomethylated in FP vs FN |
| cg09397293 | 0.484   | 0.735   | -0.250    | 3e-04            | NA                    | Hypomethylated in FP vs FN |
| cg12486533 | 0.209   | 0.507   | -0.297    | 3e-04            | BMP1                  | Hypomethylated in FP vs FN |
| cg09651522 | 0.317   | 0.632   | -0.316    | 3e-04            | NA                    | Hypomethylated in FP vs FN |
| cg09484039 | 0.083   | 0.338   | -0.255    | 3e-04            | FRZB                  | Hypomethylated in FP vs FN |
| cg23192824 | 0.538   | 0.800   | -0.262    | 3e-04            | NA                    | Hypomethylated in FP vs FN |
| cg09121339 | 0.181   | 0.452   | -0.271    | 3e-04            | NA                    | Hypomethylated in FP vs FN |
| cg16140179 | 0.401   | 0.680   | -0.279    | 3e-04            | SPERT                 | Hypomethylated in FP vs FN |
| cg00329770 | 0.448   | 0.709   | -0.261    | 3e-04            | NA                    | Hypomethylated in FP vs FN |
| cg07612768 | 0.349   | 0.679   | -0.329    | 3e-04            | NA                    | Hypomethylated in FP vs FN |
| cg14144025 | 0.220   | 0.497   | -0.277    | 3e-04            | NA                    | Hypomethylated in FP vs FN |
| cg00111978 | 0.412   | 0.673   | -0.262    | 3e-04            | IL18R1                | Hypomethylated in FP vs FN |
| cg07241457 | 0.350   | 0.642   | -0.291    | 3e-04            | NA                    | Hypomethylated in FP vs FN |
| cg15160198 | 0.143   | 0.507   | -0.364    | 3e-04            | CYP7B1                | Hypomethylated in FP vs FN |
| cg03101413 | 0.492   | 0.766   | -0.274    | 3e-04            | NA                    | Hypomethylated in FP vs FN |
| cg07869839 | 0.290   | 0.576   | -0.286    | 3e-04            | NA                    | Hypomethylated in FP vs FN |
| cg16899444 | 0.380   | 0.670   | -0.290    | 3e-04            | NA                    | Hypomethylated in FP vs FN |
| cg04671145 | 0.453   | 0.779   | -0.326    | 3e-04            | NA                    | Hypomethylated in FP vs FN |

### Supplementary Table 7 (continued)

| Probe      | FP.mean | FN.mean | Mean.diff | Adjusted.P.value | Promoter.related.gene | Category                   |
|------------|---------|---------|-----------|------------------|-----------------------|----------------------------|
| cg11412468 | 0.220   | 0.516   | -0.296    | 3e-04            | NA                    | Hypomethylated in FP vs FN |
| cg22897615 | 0.531   | 0.811   | -0.280    | 3e-04            | NA                    | Hypomethylated in FP vs FN |
| cg14375387 | 0.210   | 0.590   | -0.380    | 3e-04            | TPD52L1               | Hypomethylated in FP vs FN |
| cg11254700 | 0.183   | 0.556   | -0.372    | 3e-04            | NA                    | Hypomethylated in FP vs FN |
| cg27309110 | 0.304   | 0.567   | -0.264    | 3e-04            | NA                    | Hypomethylated in FP vs FN |
| cg13213799 | 0.289   | 0.594   | -0.305    | 3e-04            | NA                    | Hypomethylated in FP vs FN |
| cg23510131 | 0.383   | 0.639   | -0.256    | 3e-04            | NA                    | Hypomethylated in FP vs FN |
| cg00655147 | 0.421   | 0.677   | -0.256    | 3e-04            | NA                    | Hypomethylated in FP vs FN |
| cg09277566 | 0.530   | 0.804   | -0.274    | 3e-04            | NA                    | Hypomethylated in FP vs FN |
| cg02224845 | 0.151   | 0.451   | -0.300    | 3e-04            | EPHA1                 | Hypomethylated in FP vs FN |
| cg12338657 | 0.374   | 0.627   | -0.253    | 3e-04            | NA                    | Hypomethylated in FP vs FN |
| cg05636467 | 0.242   | 0.512   | -0.270    | 3e-04            | NA                    | Hypomethylated in FP vs FN |
| cg01875838 | 0.356   | 0.690   | -0.334    | 3e-04            | TMED1                 | Hypomethylated in FP vs FN |
| cg08614481 | 0.212   | 0.531   | -0.320    | 3e-04            | HTR1B                 | Hypomethylated in FP vs FN |
| cg08320524 | 0.304   | 0.569   | -0.265    | 3e-04            | KCNJ15                | Hypomethylated in FP vs FN |
| cg16238419 | 0.461   | 0.718   | -0.257    | 3e-04            | IL17REL               | Hypomethylated in FP vs FN |
| cg01680010 | 0.251   | 0.502   | -0.251    | 3e-04            | NA                    | Hypomethylated in FP vs FN |
| cg02996471 | 0.282   | 0.547   | -0.265    | 3e-04            | S1PR4                 | Hypomethylated in FP vs FN |
| cg06653004 | 0.329   | 0.613   | -0.285    | 3e-04            | TFAP2B                | Hypomethylated in FP vs FN |
| cg04551925 | 0.560   | 0.814   | -0.255    | 3e-04            | AQP1                  | Hypomethylated in FP vs FN |
| cg26705688 | 0.085   | 0.353   | -0.267    | 3e-04            | NA                    | Hypomethylated in FP vs FN |
| cg08970446 | 0.459   | 0.712   | -0.254    | 3e-04            | SLC1A7                | Hypomethylated in FP vs FN |
| cg13227697 | 0.250   | 0.549   | -0.299    | 3e-04            | NA                    | Hypomethylated in FP vs FN |
| cg04157272 | 0.428   | 0.705   | -0.277    | 3e-04            | NA                    | Hypomethylated in FP vs FN |
| cg12261786 | 0.356   | 0.636   | -0.280    | 3e-04            | C10orf116             | Hypomethylated in FP vs FN |

### Supplementary Table 7 (continued)

| Probe      | FP.mean | FN.mean | Mean.diff | Adjusted.P.value | Promoter.related.gene | Category                   |
|------------|---------|---------|-----------|------------------|-----------------------|----------------------------|
| cg14666564 | 0.210   | 0.548   | -0.338    | 3e-04            | NA                    | Hypomethylated in FP vs FN |
| cg08926253 | 0.343   | 0.608   | -0.265    | 3e-04            | NA                    | Hypomethylated in FP vs FN |
| cg25159668 | 0.404   | 0.686   | -0.282    | 3e-04            | AADACL2               | Hypomethylated in FP vs FN |
| cg23984035 | 0.478   | 0.753   | -0.275    | 3e-04            | NA                    | Hypomethylated in FP vs FN |
| cg12833207 | 0.193   | 0.534   | -0.341    | 3e-04            | STEAP4                | Hypomethylated in FP vs FN |
| cg19362478 | 0.405   | 0.659   | -0.254    | 3e-04            | NA                    | Hypomethylated in FP vs FN |
| cg22010052 | 0.247   | 0.552   | -0.305    | 3e-04            | LVRN                  | Hypomethylated in FP vs FN |
| cg10001848 | 0.456   | 0.731   | -0.275    | 3e-04            | NA                    | Hypomethylated in FP vs FN |
| cg15464821 | 0.352   | 0.655   | -0.303    | 3e-04            | NA                    | Hypomethylated in FP vs FN |
| cg07341290 | 0.141   | 0.448   | -0.307    | 3e-04            | NA                    | Hypomethylated in FP vs FN |
| cg00399483 | 0.219   | 0.492   | -0.274    | 3e-04            | NA                    | Hypomethylated in FP vs FN |
| cg01139880 | 0.523   | 0.784   | -0.261    | 3e-04            | NA                    | Hypomethylated in FP vs FN |
| cg22250498 | 0.201   | 0.514   | -0.313    | 3e-04            | HRASLS5               | Hypomethylated in FP vs FN |
| cg20273485 | 0.338   | 0.632   | -0.294    | 3e-04            | NA                    | Hypomethylated in FP vs FN |
| cg23998071 | 0.232   | 0.541   | -0.309    | 3e-04            | NA                    | Hypomethylated in FP vs FN |
| cg26706163 | 0.472   | 0.736   | -0.264    | 3e-04            | NA                    | Hypomethylated in FP vs FN |
| cg15648060 | 0.444   | 0.723   | -0.278    | 3e-04            | NA                    | Hypomethylated in FP vs FN |
| cg15074033 | 0.304   | 0.643   | -0.338    | 3e-04            | NA                    | Hypomethylated in FP vs FN |
| cg26466587 | 0.259   | 0.610   | -0.351    | 3e-04            | MCHR2                 | Hypomethylated in FP vs FN |
| cg21836370 | 0.461   | 0.754   | -0.294    | 3e-04            | NA                    | Hypomethylated in FP vs FN |
| cg21488279 | 0.427   | 0.679   | -0.252    | 3e-04            | NA                    | Hypomethylated in FP vs FN |
| cg10137231 | 0.319   | 0.602   | -0.283    | 3e-04            | REC8                  | Hypomethylated in FP vs FN |
| cg24042242 | 0.096   | 0.375   | -0.280    | 3e-04            | NA                    | Hypomethylated in FP vs FN |
| cg08254266 | 0.478   | 0.752   | -0.274    | 3e-04            | KCNU1                 | Hypomethylated in FP vs FN |
| cg04406436 | 0.114   | 0.427   | -0.313    | 3e-04            | NA                    | Hypomethylated in FP vs FN |

### Supplementary Table 7 (continued)

| Probe      | FP.mean | FN.mean | Mean.diff | Adjusted.P.value | Promoter.related.gene | Category                   |
|------------|---------|---------|-----------|------------------|-----------------------|----------------------------|
| cg27345757 | 0.229   | 0.485   | -0.257    | 3e-04            | NA                    | Hypomethylated in FP vs FN |
| cg27324117 | 0.474   | 0.725   | -0.251    | 3e-04            | NA                    | Hypomethylated in FP vs FN |
| cg14981819 | 0.281   | 0.546   | -0.265    | 3e-04            | NA                    | Hypomethylated in FP vs FN |
| cg21058822 | 0.399   | 0.692   | -0.292    | 3e-04            | MBOAT4                | Hypomethylated in FP vs FN |
| cg12662091 | 0.124   | 0.438   | -0.314    | 3e-04            | NA                    | Hypomethylated in FP vs FN |
| cg21546155 | 0.342   | 0.662   | -0.320    | 3e-04            | NA                    | Hypomethylated in FP vs FN |
| cg21805936 | 0.264   | 0.606   | -0.342    | 3e-04            | NA                    | Hypomethylated in FP vs FN |
| cg27401846 | 0.404   | 0.672   | -0.268    | 3e-04            | NA                    | Hypomethylated in FP vs FN |
| cg21228500 | 0.253   | 0.582   | -0.329    | 3e-04            | NA                    | Hypomethylated in FP vs FN |
| cg09665320 | 0.254   | 0.531   | -0.277    | 3e-04            | NA                    | Hypomethylated in FP vs FN |
| cg04819096 | 0.266   | 0.561   | -0.296    | 3e-04            | NA                    | Hypomethylated in FP vs FN |
| cg02440199 | 0.340   | 0.600   | -0.260    | 3e-04            | NA                    | Hypomethylated in FP vs FN |
| cg03667051 | 0.141   | 0.435   | -0.294    | 3e-04            | NA                    | Hypomethylated in FP vs FN |
| cg12938020 | 0.337   | 0.660   | -0.323    | 3e-04            | NA                    | Hypomethylated in FP vs FN |
| cg04912843 | 0.148   | 0.506   | -0.358    | 3e-04            | GIPC2                 | Hypomethylated in FP vs FN |
| cg20495052 | 0.375   | 0.639   | -0.265    | 3e-04            | NA                    | Hypomethylated in FP vs FN |
| cg13546935 | 0.237   | 0.591   | -0.355    | 3e-04            | SPDYA                 | Hypomethylated in FP vs FN |
| cg21033965 | 0.364   | 0.637   | -0.273    | 3e-04            | NA                    | Hypomethylated in FP vs FN |
| cg00503840 | 0.340   | 0.623   | -0.283    | 3e-04            | NA                    | Hypomethylated in FP vs FN |
| cg27088384 | 0.507   | 0.774   | -0.268    | 3e-04            | NA                    | Hypomethylated in FP vs FN |
| cg26910511 | 0.369   | 0.650   | -0.282    | 3e-04            | NA                    | Hypomethylated in FP vs FN |
| cg09398762 | 0.346   | 0.649   | -0.304    | 3e-04            | NA                    | Hypomethylated in FP vs FN |
| cg18841634 | 0.133   | 0.401   | -0.268    | 3e-04            | NA                    | Hypomethylated in FP vs FN |
| cg25437411 | 0.269   | 0.614   | -0.344    | 3e-04            | HPSE2                 | Hypomethylated in FP vs FN |
| cg23741520 | 0.363   | 0.614   | -0.251    | 3e-04            | BNC1                  | Hypomethylated in FP vs FN |

### Supplementary Table 7 (continued)

| Probe      | FP.mean | FN.mean | Mean.diff | Adjusted.P.value | Promoter.related.gene | Category                   |
|------------|---------|---------|-----------|------------------|-----------------------|----------------------------|
| cg03344570 | 0.081   | 0.385   | -0.303    | 3e-04            | NA                    | Hypomethylated in FP vs FN |
| cg21543589 | 0.330   | 0.655   | -0.326    | 3e-04            | COX4I2                | Hypomethylated in FP vs FN |
| cg08618204 | 0.455   | 0.726   | -0.271    | 3e-04            | NA                    | Hypomethylated in FP vs FN |
| cg14189750 | 0.162   | 0.442   | -0.280    | 3e-04            | NA                    | Hypomethylated in FP vs FN |
| cg18635723 | 0.226   | 0.511   | -0.286    | 3e-04            | NA                    | Hypomethylated in FP vs FN |
| cg00208274 | 0.256   | 0.573   | -0.318    | 3e-04            | NA                    | Hypomethylated in FP vs FN |
| cg24975222 | 0.189   | 0.480   | -0.291    | 3e-04            | CDCP1                 | Hypomethylated in FP vs FN |
| cg05628616 | 0.431   | 0.735   | -0.304    | 3e-04            | NA                    | Hypomethylated in FP vs FN |
| cg04285652 | 0.385   | 0.668   | -0.283    | 3e-04            | NA                    | Hypomethylated in FP vs FN |
| cg08754149 | 0.446   | 0.703   | -0.257    | 3e-04            | NA                    | Hypomethylated in FP vs FN |
| cg10803577 | 0.454   | 0.729   | -0.276    | 3e-04            | NA                    | Hypomethylated in FP vs FN |
| cg07416656 | 0.347   | 0.635   | -0.288    | 3e-04            | NA                    | Hypomethylated in FP vs FN |
| cg19788741 | 0.095   | 0.455   | -0.360    | 3e-04            | SLCO4C1               | Hypomethylated in FP vs FN |
| cg06123783 | 0.089   | 0.368   | -0.280    | 3e-04            | LOC441046             | Hypomethylated in FP vs FN |
| cg07112260 | 0.176   | 0.428   | -0.252    | 3e-04            | NA                    | Hypomethylated in FP vs FN |
| cg06059069 | 0.556   | 0.832   | -0.276    | 3e-04            | NA                    | Hypomethylated in FP vs FN |
| cg23647989 | 0.425   | 0.701   | -0.276    | 3e-04            | NA                    | Hypomethylated in FP vs FN |
| cg23930825 | 0.271   | 0.527   | -0.257    | 3e-04            | NA                    | Hypomethylated in FP vs FN |
| cg09086835 | 0.431   | 0.702   | -0.271    | 3e-04            | NA                    | Hypomethylated in FP vs FN |
| cg04868764 | 0.191   | 0.507   | -0.316    | 3e-04            | SPINT1                | Hypomethylated in FP vs FN |
| cg07641160 | 0.087   | 0.388   | -0.301    | 3e-04            | FAM162B               | Hypomethylated in FP vs FN |
| cg00539542 | 0.343   | 0.603   | -0.260    | 3e-04            | NA                    | Hypomethylated in FP vs FN |
| cg08935418 | 0.320   | 0.618   | -0.299    | 3e-04            | NA                    | Hypomethylated in FP vs FN |
| cg03480337 | 0.365   | 0.685   | -0.319    | 3e-04            | NA                    | Hypomethylated in FP vs FN |
| cg11629220 | 0.366   | 0.696   | -0.330    | 3e-04            | NA                    | Hypomethylated in FP vs FN |

### Supplementary Table 7 (continued)

| Probe      | FP.mean | FN.mean | Mean.diff | Adjusted.P.value | Promoter.related.gene | Category                   |
|------------|---------|---------|-----------|------------------|-----------------------|----------------------------|
| cg04273573 | 0.302   | 0.579   | -0.278    | 3e-04            | NA                    | Hypomethylated in FP vs FN |
| cg00737978 | 0.236   | 0.541   | -0.305    | 3e-04            | C18orf1               | Hypomethylated in FP vs FN |
| cg14428252 | 0.131   | 0.446   | -0.315    | 3e-04            | NA                    | Hypomethylated in FP vs FN |
| cg05139728 | 0.389   | 0.659   | -0.270    | 3e-04            | NA                    | Hypomethylated in FP vs FN |
| cg10088320 | 0.214   | 0.474   | -0.261    | 3e-04            | NA                    | Hypomethylated in FP vs FN |
| cg00095165 | 0.242   | 0.502   | -0.260    | 3e-04            | NA                    | Hypomethylated in FP vs FN |
| cg18245160 | 0.419   | 0.682   | -0.263    | 3e-04            | NA                    | Hypomethylated in FP vs FN |
| cg26678765 | 0.339   | 0.614   | -0.275    | 3e-04            | C1orf161              | Hypomethylated in FP vs FN |
| cg16112157 | 0.513   | 0.773   | -0.259    | 3e-04            | KRT6A                 | Hypomethylated in FP vs FN |
| cg19717150 | 0.384   | 0.652   | -0.267    | 3e-04            | NA                    | Hypomethylated in FP vs FN |
| cg03771840 | 0.196   | 0.527   | -0.331    | 3e-04            | NA                    | Hypomethylated in FP vs FN |
| cg04842880 | 0.400   | 0.658   | -0.258    | 3e-04            | NA                    | Hypomethylated in FP vs FN |
| cg09884076 | 0.206   | 0.545   | -0.339    | 3e-04            | NA                    | Hypomethylated in FP vs FN |
| cg01296927 | 0.332   | 0.623   | -0.291    | 3e-04            | NA                    | Hypomethylated in FP vs FN |
| cg03847796 | 0.357   | 0.651   | -0.295    | 3e-04            | C1orf161              | Hypomethylated in FP vs FN |
| cg00661970 | 0.507   | 0.779   | -0.272    | 3e-04            | NA                    | Hypomethylated in FP vs FN |
| cg15172529 | 0.198   | 0.488   | -0.291    | 3e-04            | NA                    | Hypomethylated in FP vs FN |
| cg19503977 | 0.247   | 0.582   | -0.335    | 3e-04            | HTR1B                 | Hypomethylated in FP vs FN |
| cg13546414 | 0.372   | 0.666   | -0.293    | 3e-04            | NA                    | Hypomethylated in FP vs FN |
| cg03389046 | 0.431   | 0.681   | -0.251    | 3e-04            | NA                    | Hypomethylated in FP vs FN |
| cg14328779 | 0.424   | 0.687   | -0.263    | 3e-04            | NA                    | Hypomethylated in FP vs FN |
| cg01075918 | 0.441   | 0.718   | -0.277    | 3e-04            | VAPA                  | Hypomethylated in FP vs FN |
| cg25074066 | 0.294   | 0.549   | -0.255    | 3e-04            | CHRM1                 | Hypomethylated in FP vs FN |
| cg04531704 | 0.284   | 0.618   | -0.334    | 3e-04            | NA                    | Hypomethylated in FP vs FN |
| cg27365825 | 0.232   | 0.594   | -0.362    | 3e-04            | KCNS3                 | Hypomethylated in FP vs FN |

### Supplementary Table 7 (continued)

| Probe      | FP.mean | FN.mean | Mean.diff | Adjusted.P.value | Promoter.related.gene | Category                   |
|------------|---------|---------|-----------|------------------|-----------------------|----------------------------|
| cg19795722 | 0.504   | 0.779   | -0.275    | 3e-04            | NA                    | Hypomethylated in FP vs FN |
| cg26401870 | 0.236   | 0.554   | -0.318    | 3e-04            | NPM2                  | Hypomethylated in FP vs FN |
| cg14388195 | 0.069   | 0.333   | -0.264    | 3e-04            | NA                    | Hypomethylated in FP vs FN |
| cg01745789 | 0.509   | 0.782   | -0.273    | 3e-04            | NA                    | Hypomethylated in FP vs FN |
| cg09552123 | 0.345   | 0.626   | -0.281    | 3e-04            | SMCP                  | Hypomethylated in FP vs FN |
| cg07637239 | 0.314   | 0.583   | -0.269    | 3e-04            | NA                    | Hypomethylated in FP vs FN |
| cg04043455 | 0.236   | 0.523   | -0.287    | 3e-04            | NA                    | Hypomethylated in FP vs FN |
| cg08932256 | 0.395   | 0.683   | -0.288    | 3e-04            | NA                    | Hypomethylated in FP vs FN |
| cg22111442 | 0.349   | 0.605   | -0.256    | 3e-04            | SNORD85               | Hypomethylated in FP vs FN |
| cg25514304 | 0.316   | 0.578   | -0.262    | 3e-04            | NA                    | Hypomethylated in FP vs FN |
| cg16559598 | 0.223   | 0.523   | -0.300    | 3e-04            | TBX5                  | Hypomethylated in FP vs FN |
| cg18628371 | 0.197   | 0.484   | -0.287    | 3e-04            | REC8                  | Hypomethylated in FP vs FN |
| cg12192691 | 0.201   | 0.455   | -0.254    | 3e-04            | NA                    | Hypomethylated in FP vs FN |
| cg11991903 | 0.336   | 0.597   | -0.261    | 3e-04            | NA                    | Hypomethylated in FP vs FN |
| cg01854776 | 0.292   | 0.551   | -0.259    | 3e-04            | NA                    | Hypomethylated in FP vs FN |
| cg02886208 | 0.519   | 0.816   | -0.296    | 3e-04            | NA                    | Hypomethylated in FP vs FN |
| cg15318546 | 0.265   | 0.551   | -0.285    | 3e-04            | NA                    | Hypomethylated in FP vs FN |
| cg13048822 | 0.374   | 0.632   | -0.257    | 3e-04            | PCDHGB1               | Hypomethylated in FP vs FN |
| cg19719133 | 0.190   | 0.583   | -0.393    | 3e-04            | NA                    | Hypomethylated in FP vs FN |
| cg14819504 | 0.324   | 0.693   | -0.369    | 3e-04            | LY75                  | Hypomethylated in FP vs FN |
| cg09198782 | 0.451   | 0.717   | -0.266    | 3e-04            | SLC22A18              | Hypomethylated in FP vs FN |
| cg18515591 | 0.391   | 0.680   | -0.289    | 3e-04            | BTG4_MIR34C_MIR34B    | Hypomethylated in FP vs FN |
| cg11689813 | 0.066   | 0.342   | -0.276    | 3e-04            | ACTA1                 | Hypomethylated in FP vs FN |
| cg06056169 | 0.278   | 0.580   | -0.302    | 3e-04            | CELSR1                | Hypomethylated in FP vs FN |
| cg13272280 | 0.109   | 0.402   | -0.293    | 3e-04            | NA                    | Hypomethylated in FP vs FN |

### Supplementary Table 7 (continued)

| Probe      | FP.mean | FN.mean | Mean.diff | Adjusted.P.value | Promoter.related.gene | Category                   |
|------------|---------|---------|-----------|------------------|-----------------------|----------------------------|
| cg09246829 | 0.199   | 0.508   | -0.310    | 3e-04            | NA                    | Hypomethylated in FP vs FN |
| cg15786205 | 0.399   | 0.690   | -0.290    | 3e-04            | NA                    | Hypomethylated in FP vs FN |
| cg09148852 | 0.205   | 0.468   | -0.263    | 3e-04            | NA                    | Hypomethylated in FP vs FN |
| cg25580825 | 0.464   | 0.726   | -0.262    | 3e-04            | NA                    | Hypomethylated in FP vs FN |
| cg09370867 | 0.399   | 0.689   | -0.290    | 3e-04            | FGR                   | Hypomethylated in FP vs FN |
| cg07516252 | 0.155   | 0.474   | -0.319    | 3e-04            | REC8                  | Hypomethylated in FP vs FN |
| cg04168853 | 0.172   | 0.493   | -0.321    | 3e-04            | NA                    | Hypomethylated in FP vs FN |
| cg11686901 | 0.572   | 0.851   | -0.279    | 3e-04            | NA                    | Hypomethylated in FP vs FN |
| cg21890551 | 0.356   | 0.660   | -0.304    | 3e-04            | NA                    | Hypomethylated in FP vs FN |
| cg00146027 | 0.361   | 0.621   | -0.260    | 3e-04            | NA                    | Hypomethylated in FP vs FN |
| cg17713488 | 0.311   | 0.563   | -0.252    | 3e-04            | NA                    | Hypomethylated in FP vs FN |
| cg02071712 | 0.148   | 0.401   | -0.253    | 3e-04            | NT5DC3                | Hypomethylated in FP vs FN |
| cg22226821 | 0.226   | 0.532   | -0.307    | 3e-04            | NA                    | Hypomethylated in FP vs FN |
| cg21236182 | 0.424   | 0.688   | -0.265    | 3e-04            | NA                    | Hypomethylated in FP vs FN |
| cg26767632 | 0.215   | 0.497   | -0.282    | 3e-04            | PGLYRP1               | Hypomethylated in FP vs FN |
| cg26279336 | 0.281   | 0.588   | -0.306    | 3e-04            | NA                    | Hypomethylated in FP vs FN |
| cg25633678 | 0.372   | 0.706   | -0.334    | 3e-04            | NA                    | Hypomethylated in FP vs FN |
| cg25775494 | 0.127   | 0.409   | -0.283    | 3e-04            | NA                    | Hypomethylated in FP vs FN |
| cg01693350 | 0.526   | 0.795   | -0.269    | 3e-04            | NA                    | Hypomethylated in FP vs FN |
| cg14116129 | 0.213   | 0.466   | -0.252    | 3e-04            | NA                    | Hypomethylated in FP vs FN |
| cg02605601 | 0.293   | 0.597   | -0.305    | 3e-04            | NA                    | Hypomethylated in FP vs FN |
| cg13233461 | 0.272   | 0.663   | -0.391    | 3e-04            | NA                    | Hypomethylated in FP vs FN |
| cg07138070 | 0.262   | 0.538   | -0.277    | 3e-04            | NA                    | Hypomethylated in FP vs FN |
| cg02820748 | 0.154   | 0.488   | -0.334    | 3e-04            | TPD52L1               | Hypomethylated in FP vs FN |
| cg18912484 | 0.098   | 0.404   | -0.306    | 3e-04            | NA                    | Hypomethylated in FP vs FN |



### Supplementary Table 7 (continued)

| Probe      | FP.mean | FN.mean | Mean.diff | Adjusted.P.value | Promoter.related.gene | Category                   |
|------------|---------|---------|-----------|------------------|-----------------------|----------------------------|
| cg13506354 | 0.492   | 0.749   | -0.257    | 3e-04            | XRCC5                 | Hypomethylated in FP vs FN |
| cg19967668 | 0.362   | 0.631   | -0.269    | 3e-04            | NA                    | Hypomethylated in FP vs FN |
| cg12044923 | 0.380   | 0.643   | -0.263    | 3e-04            | NA                    | Hypomethylated in FP vs FN |
| cg12351587 | 0.315   | 0.566   | -0.251    | 3e-04            | NA                    | Hypomethylated in FP vs FN |
| cg14598478 | 0.331   | 0.585   | -0.254    | 3e-04            | NA                    | Hypomethylated in FP vs FN |
| cg13046853 | 0.329   | 0.583   | -0.253    | 3e-04            | NA                    | Hypomethylated in FP vs FN |
| cg18877699 | 0.318   | 0.582   | -0.263    | 3e-04            | NA                    | Hypomethylated in FP vs FN |
| cg03281194 | 0.539   | 0.790   | -0.251    | 3e-04            | NA                    | Hypomethylated in FP vs FN |
| cg20435387 | 0.453   | 0.711   | -0.258    | 3e-04            | LOC285740             | Hypomethylated in FP vs FN |
| cg27032146 | 0.216   | 0.555   | -0.339    | 3e-04            | NA                    | Hypomethylated in FP vs FN |
| cg00655913 | 0.138   | 0.438   | -0.300    | 3e-04            | NA                    | Hypomethylated in FP vs FN |
| cg18250736 | 0.388   | 0.661   | -0.273    | 3e-04            | NA                    | Hypomethylated in FP vs FN |
| cg04689080 | 0.103   | 0.509   | -0.406    | 3e-04            | NA                    | Hypomethylated in FP vs FN |
| cg09374774 | 0.270   | 0.529   | -0.259    | 3e-04            | FAM78A                | Hypomethylated in FP vs FN |
| cg14001023 | 0.306   | 0.651   | -0.345    | 3e-04            | PGLYRP1               | Hypomethylated in FP vs FN |
| cg27349540 | 0.381   | 0.633   | -0.251    | 3e-04            | NA                    | Hypomethylated in FP vs FN |
| cg22991959 | 0.100   | 0.366   | -0.266    | 3e-04            | SLCO4C1               | Hypomethylated in FP vs FN |
| cg16099169 | 0.284   | 0.576   | -0.292    | 3e-04            | NA                    | Hypomethylated in FP vs FN |
| cg08487063 | 0.287   | 0.628   | -0.341    | 3e-04            | NA                    | Hypomethylated in FP vs FN |
| cg03610073 | 0.301   | 0.570   | -0.270    | 3e-04            | TLR2                  | Hypomethylated in FP vs FN |
| cg07557690 | 0.351   | 0.615   | -0.264    | 3e-04            | TGFBR3                | Hypomethylated in FP vs FN |
| cg00570069 | 0.278   | 0.580   | -0.303    | 3e-04            | NA                    | Hypomethylated in FP vs FN |
| cg10094691 | 0.436   | 0.689   | -0.253    | 3e-04            | NA                    | Hypomethylated in FP vs FN |
| cg07616828 | 0.272   | 0.562   | -0.290    | 3e-04            | NA                    | Hypomethylated in FP vs FN |
| cg04633600 | 0.132   | 0.391   | -0.259    | 3e-04            | SLCO4C1               | Hypomethylated in FP vs FN |

### Supplementary Table 7 (continued)

| Probe      | FP.mean | FN.mean | Mean.diff | Adjusted.P.value | Promoter.related.gene | Category                   |
|------------|---------|---------|-----------|------------------|-----------------------|----------------------------|
| cg04510564 | 0.502   | 0.776   | -0.274    | 3e-04            | NA                    | Hypomethylated in FP vs FN |
| cg19768599 | 0.146   | 0.435   | -0.289    | 3e-04            | SLC12A8               | Hypomethylated in FP vs FN |
| cg15448056 | 0.476   | 0.779   | -0.303    | 3e-04            | NA                    | Hypomethylated in FP vs FN |
| cg14032033 | 0.581   | 0.831   | -0.250    | 3e-04            | NA                    | Hypomethylated in FP vs FN |
| cg20826610 | 0.376   | 0.637   | -0.261    | 3e-04            | NA                    | Hypomethylated in FP vs FN |
| cg17029354 | 0.442   | 0.711   | -0.269    | 3e-04            | NA                    | Hypomethylated in FP vs FN |
| cg06480736 | 0.134   | 0.457   | -0.323    | 3e-04            | SLCO4C1               | Hypomethylated in FP vs FN |
| cg12183993 | 0.155   | 0.451   | -0.296    | 3e-04            | NA                    | Hypomethylated in FP vs FN |
| cg13112361 | 0.246   | 0.555   | -0.309    | 3e-04            | HRASLS5               | Hypomethylated in FP vs FN |
| cg07823273 | 0.309   | 0.576   | -0.267    | 3e-04            | SYCN                  | Hypomethylated in FP vs FN |
| cg12759298 | 0.218   | 0.550   | -0.333    | 3e-04            | NA                    | Hypomethylated in FP vs FN |
| cg04435807 | 0.382   | 0.641   | -0.260    | 3e-04            | NA                    | Hypomethylated in FP vs FN |
| cg03146733 | 0.373   | 0.643   | -0.270    | 3e-04            | NA                    | Hypomethylated in FP vs FN |
| cg03831665 | 0.392   | 0.684   | -0.292    | 3e-04            | NA                    | Hypomethylated in FP vs FN |
| cg07751641 | 0.249   | 0.547   | -0.298    | 3e-04            | NA                    | Hypomethylated in FP vs FN |
| cg00725401 | 0.095   | 0.354   | -0.259    | 3e-04            | NA                    | Hypomethylated in FP vs FN |
| cg23882862 | 0.118   | 0.490   | -0.371    | 3e-04            | C11orf93              | Hypomethylated in FP vs FN |
| cg12426653 | 0.384   | 0.676   | -0.292    | 3e-04            | NA                    | Hypomethylated in FP vs FN |
| cg24684077 | 0.458   | 0.764   | -0.307    | 3e-04            | NA                    | Hypomethylated in FP vs FN |
| cg25017223 | 0.237   | 0.553   | -0.316    | 3e-04            | NA                    | Hypomethylated in FP vs FN |
| cg04700861 | 0.444   | 0.716   | -0.272    | 3e-04            | NA                    | Hypomethylated in FP vs FN |
| cg04471192 | 0.483   | 0.762   | -0.279    | 3e-04            | NA                    | Hypomethylated in FP vs FN |
| cg24631845 | 0.470   | 0.739   | -0.269    | 3e-04            | NA                    | Hypomethylated in FP vs FN |
| cg23564241 | 0.420   | 0.691   | -0.271    | 3e-04            | IL22RA2               | Hypomethylated in FP vs FN |
| cg12510458 | 0.316   | 0.617   | -0.301    | 3e-04            | NA                    | Hypomethylated in FP vs FN |

### Supplementary Table 7 (continued)

| Probe      | FP.mean | FN.mean | Mean.diff | Adjusted.P.value | Promoter.related.gene | Category                   |
|------------|---------|---------|-----------|------------------|-----------------------|----------------------------|
| cg16009970 | 0.501   | 0.757   | -0.257    | 3e-04            | YBX2                  | Hypomethylated in FP vs FN |
| cg26115633 | 0.257   | 0.665   | -0.408    | 3e-04            | FOXI2                 | Hypomethylated in FP vs FN |
| cg12319423 | 0.191   | 0.458   | -0.268    | 3e-04            | SCAND3                | Hypomethylated in FP vs FN |
| cg25044651 | 0.282   | 0.588   | -0.305    | 3e-04            | LVRN                  | Hypomethylated in FP vs FN |
| cg01218587 | 0.320   | 0.607   | -0.287    | 3e-04            | NA                    | Hypomethylated in FP vs FN |
| cg11853788 | 0.501   | 0.785   | -0.284    | 3e-04            | NA                    | Hypomethylated in FP vs FN |
| cg10747115 | 0.107   | 0.368   | -0.261    | 3e-04            | SLC12A8               | Hypomethylated in FP vs FN |
| cg21713473 | 0.284   | 0.538   | -0.254    | 3e-04            | NA                    | Hypomethylated in FP vs FN |
| cg26906629 | 0.392   | 0.683   | -0.291    | 3e-04            | NA                    | Hypomethylated in FP vs FN |
| cg04812189 | 0.357   | 0.624   | -0.267    | 3e-04            | GPR156                | Hypomethylated in FP vs FN |
| cg08949339 | 0.151   | 0.431   | -0.281    | 4e-04            | NA                    | Hypomethylated in FP vs FN |
| cg03549127 | 0.099   | 0.448   | -0.349    | 4e-04            | GCA                   | Hypomethylated in FP vs FN |
| cg18131851 | 0.187   | 0.486   | -0.299    | 4e-04            | PCDHB10               | Hypomethylated in FP vs FN |
| cg22550847 | 0.393   | 0.669   | -0.276    | 4e-04            | NA                    | Hypomethylated in FP vs FN |
| cg11442608 | 0.429   | 0.698   | -0.269    | 4e-04            | NA                    | Hypomethylated in FP vs FN |
| cg19516457 | 0.164   | 0.435   | -0.272    | 4e-04            | LOC283392             | Hypomethylated in FP vs FN |
| cg06338710 | 0.389   | 0.668   | -0.279    | 4e-04            | NA                    | Hypomethylated in FP vs FN |
| cg00549772 | 0.194   | 0.458   | -0.264    | 4e-04            | NA                    | Hypomethylated in FP vs FN |
| cg00206063 | 0.386   | 0.700   | -0.314    | 4e-04            | NA                    | Hypomethylated in FP vs FN |
| cg25123266 | 0.269   | 0.527   | -0.258    | 4e-04            | SLC26A8               | Hypomethylated in FP vs FN |
| cg11857794 | 0.430   | 0.684   | -0.253    | 4e-04            | NA                    | Hypomethylated in FP vs FN |
| cg08873805 | 0.079   | 0.359   | -0.280    | 4e-04            | ZSCAN18               | Hypomethylated in FP vs FN |
| cg19722748 | 0.263   | 0.547   | -0.284    | 4e-04            | NA                    | Hypomethylated in FP vs FN |
| cg20208384 | 0.165   | 0.475   | -0.309    | 4e-04            | NA                    | Hypomethylated in FP vs FN |
| cg16279861 | 0.431   | 0.725   | -0.294    | 4e-04            | NA                    | Hypomethylated in FP vs FN |

### Supplementary Table 7 (continued)

| Probe      | FP.mean | FN.mean | Mean.diff | Adjusted.P.value | Promoter.related.gene | Category                   |
|------------|---------|---------|-----------|------------------|-----------------------|----------------------------|
| cg14578895 | 0.400   | 0.654   | -0.254    | 4e-04            | NA                    | Hypomethylated in FP vs FN |
| cg00092518 | 0.438   | 0.802   | -0.364    | 4e-04            | PHF11                 | Hypomethylated in FP vs FN |
| cg22433862 | 0.356   | 0.611   | -0.255    | 4e-04            | NA                    | Hypomethylated in FP vs FN |
| cg17515837 | 0.469   | 0.740   | -0.271    | 4e-04            | NA                    | Hypomethylated in FP vs FN |
| cg19918599 | 0.394   | 0.667   | -0.273    | 4e-04            | NA                    | Hypomethylated in FP vs FN |
| cg06908244 | 0.211   | 0.482   | -0.270    | 4e-04            | NA                    | Hypomethylated in FP vs FN |
| cg19818890 | 0.160   | 0.439   | -0.279    | 4e-04            | NA                    | Hypomethylated in FP vs FN |
| cg27233847 | 0.393   | 0.643   | -0.250    | 4e-04            | NA                    | Hypomethylated in FP vs FN |
| cg10836406 | 0.351   | 0.651   | -0.301    | 4e-04            | NA                    | Hypomethylated in FP vs FN |
| cg23728669 | 0.191   | 0.507   | -0.317    | 4e-04            | HRASLS5               | Hypomethylated in FP vs FN |
| cg15908709 | 0.209   | 0.475   | -0.265    | 4e-04            | NA                    | Hypomethylated in FP vs FN |
| cg22280475 | 0.397   | 0.709   | -0.312    | 4e-04            | NA                    | Hypomethylated in FP vs FN |
| cg21448057 | 0.246   | 0.593   | -0.346    | 4e-04            | SLITRK1               | Hypomethylated in FP vs FN |
| cg24376776 | 0.140   | 0.481   | -0.340    | 4e-04            | NA                    | Hypomethylated in FP vs FN |
| cg11322464 | 0.272   | 0.667   | -0.395    | 4e-04            | TPD52L1               | Hypomethylated in FP vs FN |
| cg26259818 | 0.545   | 0.823   | -0.278    | 4e-04            | NA                    | Hypomethylated in FP vs FN |
| cg05171129 | 0.325   | 0.661   | -0.336    | 4e-04            | NA                    | Hypomethylated in FP vs FN |
| cg18252309 | 0.177   | 0.459   | -0.282    | 4e-04            | DPP6                  | Hypomethylated in FP vs FN |
| cg14240300 | 0.361   | 0.650   | -0.289    | 4e-04            | HOXB9                 | Hypomethylated in FP vs FN |
| cg23010507 | 0.289   | 0.601   | -0.312    | 4e-04            | NA                    | Hypomethylated in FP vs FN |
| cg24079361 | 0.084   | 0.403   | -0.318    | 4e-04            | SERP2                 | Hypomethylated in FP vs FN |
| cg06452665 | 0.146   | 0.455   | -0.309    | 4e-04            | TNFSF11               | Hypomethylated in FP vs FN |
| cg10393548 | 0.456   | 0.725   | -0.269    | 4e-04            | NA                    | Hypomethylated in FP vs FN |
| cg26127345 | 0.162   | 0.503   | -0.342    | 4e-04            | PTEN_KILLIN           | Hypomethylated in FP vs FN |
| cg16789104 | 0.189   | 0.497   | -0.308    | 4e-04            | SKAP1                 | Hypomethylated in FP vs FN |

**Supplementary Table 7 (continued)**

| Probe      | FP.mean | FN.mean | Mean.diff | Adjusted.P.value | Promoter.related.gene | Category                   |
|------------|---------|---------|-----------|------------------|-----------------------|----------------------------|
| cg04691908 | 0.291   | 0.605   | -0.314    | 4e-04            | NA                    | Hypomethylated in FP vs FN |
| cg13002222 | 0.440   | 0.718   | -0.278    | 4e-04            | NA                    | Hypomethylated in FP vs FN |
| cg06607919 | 0.147   | 0.458   | -0.311    | 4e-04            | NA                    | Hypomethylated in FP vs FN |
| cg27357229 | 0.334   | 0.603   | -0.269    | 4e-04            | NA                    | Hypomethylated in FP vs FN |
| cg05168491 | 0.330   | 0.602   | -0.272    | 4e-04            | NA                    | Hypomethylated in FP vs FN |
| cg02325540 | 0.165   | 0.448   | -0.282    | 4e-04            | NA                    | Hypomethylated in FP vs FN |
| cg08278108 | 0.157   | 0.443   | -0.286    | 4e-04            | NA                    | Hypomethylated in FP vs FN |
| cg18661868 | 0.278   | 0.550   | -0.272    | 4e-04            | FES                   | Hypomethylated in FP vs FN |
| cg07834418 | 0.291   | 0.589   | -0.299    | 4e-04            | NA                    | Hypomethylated in FP vs FN |
| cg09857324 | 0.418   | 0.682   | -0.264    | 4e-04            | NA                    | Hypomethylated in FP vs FN |
| cg11693285 | 0.487   | 0.765   | -0.278    | 4e-04            | NA                    | Hypomethylated in FP vs FN |
| cg21383280 | 0.331   | 0.617   | -0.285    | 4e-04            | NA                    | Hypomethylated in FP vs FN |
| cg26545268 | 0.146   | 0.405   | -0.260    | 4e-04            | PKHD1L1               | Hypomethylated in FP vs FN |
| cg04138756 | 0.455   | 0.708   | -0.254    | 4e-04            | SPRR3                 | Hypomethylated in FP vs FN |
| cg01941619 | 0.449   | 0.755   | -0.306    | 4e-04            | MEP1B                 | Hypomethylated in FP vs FN |
| cg23414262 | 0.391   | 0.657   | -0.266    | 4e-04            | NA                    | Hypomethylated in FP vs FN |
| cg00901554 | 0.477   | 0.748   | -0.272    | 4e-04            | NA                    | Hypomethylated in FP vs FN |
| cg08487909 | 0.358   | 0.615   | -0.258    | 4e-04            | NA                    | Hypomethylated in FP vs FN |
| cg18143296 | 0.428   | 0.734   | -0.306    | 4e-04            | NA                    | Hypomethylated in FP vs FN |
| cg24016939 | 0.053   | 0.327   | -0.274    | 4e-04            | ZNF671                | Hypomethylated in FP vs FN |
| cg03975694 | 0.210   | 0.535   | -0.325    | 4e-04            | ZNF540                | Hypomethylated in FP vs FN |
| cg02683577 | 0.384   | 0.643   | -0.259    | 4e-04            | NA                    | Hypomethylated in FP vs FN |
| cg03191962 | 0.271   | 0.538   | -0.267    | 4e-04            | C9orf9                | Hypomethylated in FP vs FN |
| cg03302259 | 0.527   | 0.796   | -0.269    | 4e-04            | ACP5                  | Hypomethylated in FP vs FN |
| cg03861217 | 0.405   | 0.657   | -0.252    | 4e-04            | NA                    | Hypomethylated in FP vs FN |

### Supplementary Table 7 (continued)

| Probe      | FP.mean | FN.mean | Mean.diff | Adjusted.P.value | Promoter.related.gene | Category                   |
|------------|---------|---------|-----------|------------------|-----------------------|----------------------------|
| cg15841205 | 0.370   | 0.646   | -0.276    | 4e-04            | NA                    | Hypomethylated in FP vs FN |
| cg27223727 | 0.080   | 0.401   | -0.321    | 4e-04            | PCP4L1                | Hypomethylated in FP vs FN |
| cg03458172 | 0.316   | 0.667   | -0.350    | 4e-04            | NA                    | Hypomethylated in FP vs FN |
| cg11085762 | 0.405   | 0.683   | -0.278    | 4e-04            | NA                    | Hypomethylated in FP vs FN |
| cg01786828 | 0.082   | 0.377   | -0.295    | 4e-04            | SWAP70                | Hypomethylated in FP vs FN |
| cg26471982 | 0.466   | 0.718   | -0.252    | 4e-04            | NA                    | Hypomethylated in FP vs FN |
| cg26447697 | 0.443   | 0.699   | -0.257    | 4e-04            | RRBP1                 | Hypomethylated in FP vs FN |
| cg26608174 | 0.125   | 0.433   | -0.308    | 4e-04            | MIR196A1              | Hypomethylated in FP vs FN |
| cg11219400 | 0.465   | 0.718   | -0.253    | 4e-04            | NA                    | Hypomethylated in FP vs FN |
| cg18519902 | 0.328   | 0.582   | -0.253    | 4e-04            | NA                    | Hypomethylated in FP vs FN |
| cg23817893 | 0.341   | 0.693   | -0.352    | 4e-04            | CCDC81                | Hypomethylated in FP vs FN |
| cg03554749 | 0.203   | 0.486   | -0.283    | 4e-04            | NA                    | Hypomethylated in FP vs FN |
| cg09519327 | 0.073   | 0.347   | -0.274    | 4e-04            | NA                    | Hypomethylated in FP vs FN |
| cg10395685 | 0.331   | 0.678   | -0.347    | 4e-04            | CCDC81                | Hypomethylated in FP vs FN |
| cg10705541 | 0.134   | 0.410   | -0.277    | 4e-04            | ZNF334                | Hypomethylated in FP vs FN |
| cg03969902 | 0.349   | 0.624   | -0.275    | 4e-04            | NA                    | Hypomethylated in FP vs FN |
| cg05756489 | 0.235   | 0.561   | -0.326    | 4e-04            | NA                    | Hypomethylated in FP vs FN |
| cg11635839 | 0.171   | 0.507   | -0.336    | 4e-04            | NA                    | Hypomethylated in FP vs FN |
| cg22224597 | 0.282   | 0.601   | -0.319    | 4e-04            | CTPS                  | Hypomethylated in FP vs FN |
| cg23211240 | 0.167   | 0.489   | -0.322    | 4e-04            | MIR34B_BTG4_MIR34C    | Hypomethylated in FP vs FN |
| cg22851295 | 0.125   | 0.404   | -0.279    | 4e-04            | GCM2                  | Hypomethylated in FP vs FN |
| cg26636054 | 0.413   | 0.684   | -0.271    | 4e-04            | FAM18A                | Hypomethylated in FP vs FN |
| cg04419610 | 0.182   | 0.447   | -0.265    | 4e-04            | NA                    | Hypomethylated in FP vs FN |
| cg12742432 | 0.412   | 0.676   | -0.264    | 4e-04            | NA                    | Hypomethylated in FP vs FN |
| cg24481868 | 0.338   | 0.712   | -0.374    | 4e-04            | PHF11                 | Hypomethylated in FP vs FN |

### Supplementary Table 7 (continued)

| Probe      | FP.mean | FN.mean | Mean.diff | Adjusted.P.value | Promoter.related.gene | Category                   |
|------------|---------|---------|-----------|------------------|-----------------------|----------------------------|
| cg17657898 | 0.352   | 0.636   | -0.284    | 4e-04            | NA                    | Hypomethylated in FP vs FN |
| cg22138302 | 0.451   | 0.704   | -0.253    | 4e-04            | ABCG4                 | Hypomethylated in FP vs FN |
| cg26919149 | 0.556   | 0.814   | -0.257    | 4e-04            | NA                    | Hypomethylated in FP vs FN |
| cg21209022 | 0.227   | 0.514   | -0.287    | 4e-04            | NA                    | Hypomethylated in FP vs FN |
| cg04064998 | 0.402   | 0.662   | -0.261    | 4e-04            | NA                    | Hypomethylated in FP vs FN |
| cg15483381 | 0.467   | 0.746   | -0.278    | 4e-04            | NA                    | Hypomethylated in FP vs FN |
| cg06817264 | 0.117   | 0.374   | -0.257    | 4e-04            | NA                    | Hypomethylated in FP vs FN |
| cg03346987 | 0.288   | 0.596   | -0.307    | 4e-04            | NA                    | Hypomethylated in FP vs FN |
| cg19998368 | 0.118   | 0.481   | -0.363    | 4e-04            | C12orf56              | Hypomethylated in FP vs FN |
| cg24984523 | 0.233   | 0.571   | -0.338    | 4e-04            | PHF11                 | Hypomethylated in FP vs FN |
| cg02126435 | 0.083   | 0.404   | -0.321    | 4e-04            | RFWD3                 | Hypomethylated in FP vs FN |
| cg04935434 | 0.383   | 0.692   | -0.309    | 4e-04            | NA                    | Hypomethylated in FP vs FN |
| cg13730743 | 0.059   | 0.347   | -0.288    | 4e-04            | NA                    | Hypomethylated in FP vs FN |
| cg27032232 | 0.237   | 0.602   | -0.365    | 4e-04            | DPP6                  | Hypomethylated in FP vs FN |
| cg11662712 | 0.463   | 0.740   | -0.278    | 4e-04            | NA                    | Hypomethylated in FP vs FN |
| cg20897936 | 0.238   | 0.554   | -0.316    | 4e-04            | SCAND3                | Hypomethylated in FP vs FN |
| cg08567279 | 0.213   | 0.610   | -0.396    | 4e-04            | NA                    | Hypomethylated in FP vs FN |
| cg09759458 | 0.225   | 0.484   | -0.259    | 4e-04            | NA                    | Hypomethylated in FP vs FN |
| cg14302471 | 0.309   | 0.611   | -0.302    | 4e-04            | LOC154822             | Hypomethylated in FP vs FN |
| cg15556873 | 0.463   | 0.721   | -0.258    | 4e-04            | NA                    | Hypomethylated in FP vs FN |
| cg13790268 | 0.341   | 0.659   | -0.318    | 4e-04            | NA                    | Hypomethylated in FP vs FN |
| cg03372385 | 0.376   | 0.682   | -0.306    | 4e-04            | NA                    | Hypomethylated in FP vs FN |
| cg22848598 | 0.199   | 0.569   | -0.371    | 4e-04            | ADAM32                | Hypomethylated in FP vs FN |
| cg11271605 | 0.263   | 0.581   | -0.318    | 4e-04            | STEAP4                | Hypomethylated in FP vs FN |
| cg13970437 | 0.460   | 0.712   | -0.252    | 4e-04            | NA                    | Hypomethylated in FP vs FN |

### Supplementary Table 7 (continued)

| Probe      | FP.mean | FN.mean | Mean.diff | Adjusted.P.value | Promoter.related.gene | Category                   |
|------------|---------|---------|-----------|------------------|-----------------------|----------------------------|
| cg01422017 | 0.407   | 0.678   | -0.271    | 4e-04            | TSPAN16               | Hypomethylated in FP vs FN |
| cg20673481 | 0.116   | 0.382   | -0.266    | 4e-04            | KCNS3                 | Hypomethylated in FP vs FN |
| cg06501832 | 0.186   | 0.468   | -0.282    | 4e-04            | NA                    | Hypomethylated in FP vs FN |
| cg13489501 | 0.466   | 0.727   | -0.261    | 4e-04            | NA                    | Hypomethylated in FP vs FN |
| cg14156751 | 0.305   | 0.632   | -0.327    | 4e-04            | NA                    | Hypomethylated in FP vs FN |
| cg19095187 | 0.263   | 0.546   | -0.283    | 4e-04            | NA                    | Hypomethylated in FP vs FN |
| cg05601844 | 0.362   | 0.629   | -0.267    | 4e-04            | NA                    | Hypomethylated in FP vs FN |
| cg07878486 | 0.079   | 0.369   | -0.291    | 4e-04            | ZNF132                | Hypomethylated in FP vs FN |
| cg00891611 | 0.365   | 0.637   | -0.272    | 4e-04            | NA                    | Hypomethylated in FP vs FN |
| cg21759280 | 0.535   | 0.810   | -0.275    | 4e-04            | NA                    | Hypomethylated in FP vs FN |
| cg16443148 | 0.151   | 0.442   | -0.291    | 4e-04            | CCDC78_HAGHL          | Hypomethylated in FP vs FN |
| cg10161743 | 0.356   | 0.620   | -0.264    | 4e-04            | NA                    | Hypomethylated in FP vs FN |
| cg23619217 | 0.394   | 0.645   | -0.251    | 4e-04            | IL25                  | Hypomethylated in FP vs FN |
| cg02317313 | 0.248   | 0.546   | -0.298    | 4e-04            | NA                    | Hypomethylated in FP vs FN |
| cg23550704 | 0.425   | 0.677   | -0.253    | 4e-04            | NA                    | Hypomethylated in FP vs FN |
| cg00017489 | 0.258   | 0.552   | -0.293    | 4e-04            | DPP6                  | Hypomethylated in FP vs FN |
| cg17675712 | 0.444   | 0.708   | -0.264    | 4e-04            | NA                    | Hypomethylated in FP vs FN |
| cg04802040 | 0.113   | 0.446   | -0.333    | 4e-04            | NA                    | Hypomethylated in FP vs FN |
| cg08175609 | 0.462   | 0.724   | -0.262    | 4e-04            | NA                    | Hypomethylated in FP vs FN |
| cg04523661 | 0.291   | 0.588   | -0.297    | 4e-04            | NA                    | Hypomethylated in FP vs FN |
| cg18907180 | 0.157   | 0.434   | -0.276    | 4e-04            | NA                    | Hypomethylated in FP vs FN |
| cg07917127 | 0.157   | 0.492   | -0.335    | 4e-04            | C4orf37               | Hypomethylated in FP vs FN |
| cg05882680 | 0.104   | 0.410   | -0.306    | 4e-04            | NA                    | Hypomethylated in FP vs FN |
| cg15038110 | 0.255   | 0.509   | -0.255    | 4e-04            | PCDHB6                | Hypomethylated in FP vs FN |
| cg11075754 | 0.146   | 0.446   | -0.300    | 4e-04            | NA                    | Hypomethylated in FP vs FN |



### Supplementary Table 7 (continued)

| Probe      | FP.mean | FN.mean | Mean.diff | Adjusted.P.value | Promoter.related.gene | Category                   |
|------------|---------|---------|-----------|------------------|-----------------------|----------------------------|
| cg14221612 | 0.315   | 0.575   | -0.260    | 4e-04            | NA                    | Hypomethylated in FP vs FN |
| cg14768785 | 0.130   | 0.419   | -0.289    | 4e-04            | GHSR                  | Hypomethylated in FP vs FN |
| cg01804281 | 0.339   | 0.623   | -0.284    | 4e-04            | NA                    | Hypomethylated in FP vs FN |
| cg12914047 | 0.170   | 0.457   | -0.288    | 4e-04            | TRIM4                 | Hypomethylated in FP vs FN |
| cg13939978 | 0.230   | 0.481   | -0.251    | 4e-04            | HOPX                  | Hypomethylated in FP vs FN |
| cg24834659 | 0.237   | 0.571   | -0.334    | 4e-04            | NA                    | Hypomethylated in FP vs FN |
| cg18193764 | 0.171   | 0.540   | -0.370    | 4e-04            | NA                    | Hypomethylated in FP vs FN |
| cg27631593 | 0.411   | 0.662   | -0.250    | 4e-04            | NA                    | Hypomethylated in FP vs FN |
| cg05016408 | 0.339   | 0.676   | -0.337    | 4e-04            | LOC134466             | Hypomethylated in FP vs FN |
| cg11823736 | 0.280   | 0.540   | -0.260    | 4e-04            | IDO2                  | Hypomethylated in FP vs FN |
| cg11299854 | 0.065   | 0.333   | -0.268    | 4e-04            | CCNI2                 | Hypomethylated in FP vs FN |
| cg05884053 | 0.277   | 0.551   | -0.274    | 4e-04            | NA                    | Hypomethylated in FP vs FN |
| cg11086764 | 0.211   | 0.509   | -0.298    | 4e-04            | NA                    | Hypomethylated in FP vs FN |
| cg25409499 | 0.158   | 0.463   | -0.305    | 4e-04            | NA                    | Hypomethylated in FP vs FN |
| cg03242471 | 0.491   | 0.743   | -0.252    | 4e-04            | NA                    | Hypomethylated in FP vs FN |
| cg14820199 | 0.160   | 0.436   | -0.276    | 4e-04            | NA                    | Hypomethylated in FP vs FN |
| cg07418387 | 0.256   | 0.615   | -0.359    | 4e-04            | NA                    | Hypomethylated in FP vs FN |
| cg05446860 | 0.481   | 0.732   | -0.252    | 4e-04            | LOC284798             | Hypomethylated in FP vs FN |
| cg20710730 | 0.242   | 0.517   | -0.276    | 4e-04            | NA                    | Hypomethylated in FP vs FN |
| cg01348293 | 0.357   | 0.642   | -0.285    | 4e-04            | NA                    | Hypomethylated in FP vs FN |
| cg05789704 | 0.168   | 0.471   | -0.303    | 4e-04            | ADAM32                | Hypomethylated in FP vs FN |
| cg11630226 | 0.304   | 0.594   | -0.290    | 4e-04            | LY6K                  | Hypomethylated in FP vs FN |
| cg11849281 | 0.172   | 0.445   | -0.274    | 4e-04            | NA                    | Hypomethylated in FP vs FN |
| cg12200038 | 0.265   | 0.626   | -0.362    | 4e-04            | NA                    | Hypomethylated in FP vs FN |
| cg03612747 | 0.235   | 0.562   | -0.327    | 4e-04            | NA                    | Hypomethylated in FP vs FN |

### Supplementary Table 7 (continued)

| Probe      | FP.mean | FN.mean | Mean.diff | Adjusted.P.value | Promoter.related.gene | Category                   |
|------------|---------|---------|-----------|------------------|-----------------------|----------------------------|
| cg03535659 | 0.188   | 0.484   | -0.296    | 4e-04            | CYP7B1                | Hypomethylated in FP vs FN |
| cg04921646 | 0.544   | 0.795   | -0.250    | 4e-04            | NA                    | Hypomethylated in FP vs FN |
| cg03510486 | 0.402   | 0.654   | -0.252    | 4e-04            | NA                    | Hypomethylated in FP vs FN |
| cg14754187 | 0.334   | 0.595   | -0.261    | 4e-04            | NA                    | Hypomethylated in FP vs FN |
| cg15801340 | 0.241   | 0.543   | -0.302    | 4e-04            | NA                    | Hypomethylated in FP vs FN |
| cg08141172 | 0.397   | 0.655   | -0.259    | 4e-04            | NA                    | Hypomethylated in FP vs FN |
| cg20953606 | 0.338   | 0.593   | -0.255    | 4e-04            | NA                    | Hypomethylated in FP vs FN |
| cg15390444 | 0.376   | 0.650   | -0.274    | 4e-04            | NA                    | Hypomethylated in FP vs FN |
| cg11452043 | 0.396   | 0.701   | -0.305    | 4e-04            | NA                    | Hypomethylated in FP vs FN |
| cg17840719 | 0.109   | 0.446   | -0.336    | 4e-04            | ZNF454                | Hypomethylated in FP vs FN |
| cg04974647 | 0.339   | 0.594   | -0.255    | 4e-04            | NA                    | Hypomethylated in FP vs FN |
| cg01104724 | 0.366   | 0.695   | -0.329    | 4e-04            | NA                    | Hypomethylated in FP vs FN |
| cg20170989 | 0.251   | 0.509   | -0.258    | 4e-04            | POM121L12             | Hypomethylated in FP vs FN |
| cg06294954 | 0.297   | 0.569   | -0.273    | 4e-04            | NA                    | Hypomethylated in FP vs FN |
| cg05342515 | 0.371   | 0.631   | -0.260    | 4e-04            | NA                    | Hypomethylated in FP vs FN |
| cg11747499 | 0.147   | 0.424   | -0.276    | 4e-04            | SSH1                  | Hypomethylated in FP vs FN |
| cg04132199 | 0.363   | 0.649   | -0.286    | 4e-04            | NA                    | Hypomethylated in FP vs FN |
| cg00761968 | 0.339   | 0.593   | -0.254    | 4e-04            | LECT1                 | Hypomethylated in FP vs FN |
| cg17569754 | 0.379   | 0.665   | -0.286    | 4e-04            | NA                    | Hypomethylated in FP vs FN |
| cg04593696 | 0.373   | 0.654   | -0.281    | 4e-04            | SLC38A8               | Hypomethylated in FP vs FN |
| cg20465794 | 0.105   | 0.493   | -0.388    | 4e-04            | C11orf93              | Hypomethylated in FP vs FN |
| cg07700393 | 0.389   | 0.653   | -0.264    | 4e-04            | NA                    | Hypomethylated in FP vs FN |
| cg04206342 | 0.274   | 0.540   | -0.265    | 4e-04            | NA                    | Hypomethylated in FP vs FN |
| cg23821914 | 0.395   | 0.656   | -0.261    | 4e-04            | NA                    | Hypomethylated in FP vs FN |
| cg10526277 | 0.394   | 0.711   | -0.318    | 4e-04            | NA                    | Hypomethylated in FP vs FN |

### Supplementary Table 7 (continued)

| Probe      | FP.mean | FN.mean | Mean.diff | Adjusted.P.value | Promoter.related.gene | Category                   |
|------------|---------|---------|-----------|------------------|-----------------------|----------------------------|
| cg22366088 | 0.178   | 0.487   | -0.309    | 4e-04            | NA                    | Hypomethylated in FP vs FN |
| cg06469229 | 0.203   | 0.541   | -0.339    | 4e-04            | NA                    | Hypomethylated in FP vs FN |
| cg25365934 | 0.343   | 0.690   | -0.347    | 4e-04            | NA                    | Hypomethylated in FP vs FN |
| cg21072567 | 0.469   | 0.770   | -0.301    | 4e-04            | NA                    | Hypomethylated in FP vs FN |
| cg24722950 | 0.441   | 0.765   | -0.325    | 4e-04            | NA                    | Hypomethylated in FP vs FN |
| cg05213896 | 0.117   | 0.408   | -0.291    | 4e-04            | NA                    | Hypomethylated in FP vs FN |
| cg20304727 | 0.298   | 0.555   | -0.257    | 4e-04            | NA                    | Hypomethylated in FP vs FN |
| cg16763574 | 0.490   | 0.741   | -0.252    | 4e-04            | NA                    | Hypomethylated in FP vs FN |
| cg00164949 | 0.289   | 0.658   | -0.370    | 4e-04            | NA                    | Hypomethylated in FP vs FN |
| cg24312874 | 0.297   | 0.551   | -0.255    | 4e-04            | NA                    | Hypomethylated in FP vs FN |
| cg06086731 | 0.146   | 0.476   | -0.329    | 4e-04            | NA                    | Hypomethylated in FP vs FN |
| cg08575537 | 0.129   | 0.418   | -0.289    | 4e-04            | NA                    | Hypomethylated in FP vs FN |
| cg23217463 | 0.532   | 0.803   | -0.271    | 4e-04            | NA                    | Hypomethylated in FP vs FN |
| cg26700716 | 0.305   | 0.599   | -0.294    | 4e-04            | FRZB                  | Hypomethylated in FP vs FN |
| cg24220733 | 0.477   | 0.741   | -0.263    | 4e-04            | NA                    | Hypomethylated in FP vs FN |
| cg17454283 | 0.295   | 0.547   | -0.251    | 4e-04            | NA                    | Hypomethylated in FP vs FN |
| cg25131632 | 0.269   | 0.537   | -0.267    | 5e-04            | NA                    | Hypomethylated in FP vs FN |
| cg22761176 | 0.399   | 0.679   | -0.280    | 5e-04            | NA                    | Hypomethylated in FP vs FN |
| cg22813622 | 0.408   | 0.702   | -0.293    | 5e-04            | FANCI                 | Hypomethylated in FP vs FN |
| cg13721134 | 0.107   | 0.365   | -0.258    | 5e-04            | CA3                   | Hypomethylated in FP vs FN |
| cg19469357 | 0.120   | 0.376   | -0.257    | 5e-04            | NA                    | Hypomethylated in FP vs FN |
| cg13874739 | 0.141   | 0.489   | -0.349    | 5e-04            | NA                    | Hypomethylated in FP vs FN |
| cg17757602 | 0.122   | 0.480   | -0.358    | 5e-04            | NA                    | Hypomethylated in FP vs FN |
| cg20208443 | 0.389   | 0.644   | -0.256    | 5e-04            | NA                    | Hypomethylated in FP vs FN |
| cg12074025 | 0.081   | 0.435   | -0.355    | 5e-04            | ZNF671                | Hypomethylated in FP vs FN |

### Supplementary Table 7 (continued)

| Probe      | FP.mean | FN.mean | Mean.diff | Adjusted.P.value | Promoter.related.gene | Category                   |
|------------|---------|---------|-----------|------------------|-----------------------|----------------------------|
| cg07136108 | 0.304   | 0.576   | -0.272    | 5e-04            | NA                    | Hypomethylated in FP vs FN |
| cg16983627 | 0.374   | 0.658   | -0.284    | 5e-04            | NA                    | Hypomethylated in FP vs FN |
| cg25112366 | 0.293   | 0.552   | -0.259    | 5e-04            | NA                    | Hypomethylated in FP vs FN |
| cg13324546 | 0.112   | 0.418   | -0.306    | 5e-04            | NKX2-6                | Hypomethylated in FP vs FN |
| cg17948913 | 0.339   | 0.605   | -0.266    | 5e-04            | NA                    | Hypomethylated in FP vs FN |
| cg24777351 | 0.269   | 0.583   | -0.315    | 5e-04            | SLC38A11              | Hypomethylated in FP vs FN |
| cg07731304 | 0.256   | 0.514   | -0.258    | 5e-04            | NA                    | Hypomethylated in FP vs FN |
| cg00118978 | 0.310   | 0.561   | -0.250    | 5e-04            | NA                    | Hypomethylated in FP vs FN |
| cg25772723 | 0.302   | 0.565   | -0.263    | 5e-04            | NA                    | Hypomethylated in FP vs FN |
| cg23884217 | 0.366   | 0.637   | -0.271    | 5e-04            | NA                    | Hypomethylated in FP vs FN |
| cg17292758 | 0.353   | 0.681   | -0.328    | 5e-04            | NA                    | Hypomethylated in FP vs FN |
| cg04100190 | 0.423   | 0.676   | -0.253    | 5e-04            | COL9A2                | Hypomethylated in FP vs FN |
| cg02989080 | 0.416   | 0.679   | -0.264    | 5e-04            | NA                    | Hypomethylated in FP vs FN |
| cg18049571 | 0.361   | 0.654   | -0.293    | 5e-04            | NA                    | Hypomethylated in FP vs FN |
| cg12421138 | 0.306   | 0.568   | -0.261    | 5e-04            | NA                    | Hypomethylated in FP vs FN |
| cg20787201 | 0.427   | 0.699   | -0.271    | 5e-04            | NA                    | Hypomethylated in FP vs FN |
| cg05533329 | 0.334   | 0.598   | -0.264    | 5e-04            | NA                    | Hypomethylated in FP vs FN |
| cg01875106 | 0.275   | 0.542   | -0.267    | 5e-04            | NA                    | Hypomethylated in FP vs FN |
| cg08126875 | 0.283   | 0.582   | -0.299    | 5e-04            | NA                    | Hypomethylated in FP vs FN |
| cg08555552 | 0.164   | 0.468   | -0.303    | 5e-04            | NA                    | Hypomethylated in FP vs FN |
| cg18534491 | 0.171   | 0.490   | -0.319    | 5e-04            | REC8                  | Hypomethylated in FP vs FN |
| cg23638042 | 0.413   | 0.664   | -0.251    | 5e-04            | NA                    | Hypomethylated in FP vs FN |
| cg02247178 | 0.193   | 0.535   | -0.341    | 5e-04            | C13orf26              | Hypomethylated in FP vs FN |
| cg25563456 | 0.142   | 0.398   | -0.257    | 5e-04            | WIT1                  | Hypomethylated in FP vs FN |
| cg04149015 | 0.301   | 0.592   | -0.291    | 5e-04            | NA                    | Hypomethylated in FP vs FN |

### Supplementary Table 7 (continued)

| Probe      | FP.mean | FN.mean | Mean.diff | Adjusted.P.value | Promoter.related.gene | Category                   |
|------------|---------|---------|-----------|------------------|-----------------------|----------------------------|
| cg02611811 | 0.296   | 0.559   | -0.262    | 5e-04            | NA                    | Hypomethylated in FP vs FN |
| cg13722619 | 0.345   | 0.619   | -0.274    | 5e-04            | CDCP1                 | Hypomethylated in FP vs FN |
| cg10411272 | 0.336   | 0.640   | -0.305    | 5e-04            | NA                    | Hypomethylated in FP vs FN |
| cg04226002 | 0.440   | 0.691   | -0.250    | 5e-04            | NA                    | Hypomethylated in FP vs FN |
| cg15555932 | 0.230   | 0.530   | -0.300    | 5e-04            | AP1M2                 | Hypomethylated in FP vs FN |
| cg22421859 | 0.176   | 0.447   | -0.271    | 5e-04            | NA                    | Hypomethylated in FP vs FN |
| cg05655534 | 0.238   | 0.533   | -0.295    | 5e-04            | NA                    | Hypomethylated in FP vs FN |
| cg21770330 | 0.186   | 0.438   | -0.252    | 5e-04            | NA                    | Hypomethylated in FP vs FN |
| cg22566355 | 0.371   | 0.634   | -0.263    | 5e-04            | NA                    | Hypomethylated in FP vs FN |
| cg26685246 | 0.367   | 0.627   | -0.260    | 5e-04            | NA                    | Hypomethylated in FP vs FN |
| cg09952395 | 0.213   | 0.523   | -0.310    | 5e-04            | HRASLS5               | Hypomethylated in FP vs FN |
| cg10812027 | 0.349   | 0.612   | -0.264    | 5e-04            | NA                    | Hypomethylated in FP vs FN |
| cg19091403 | 0.272   | 0.549   | -0.276    | 5e-04            | NA                    | Hypomethylated in FP vs FN |
| cg00893493 | 0.345   | 0.626   | -0.281    | 5e-04            | NA                    | Hypomethylated in FP vs FN |
| cg26159832 | 0.299   | 0.566   | -0.267    | 5e-04            | NA                    | Hypomethylated in FP vs FN |
| cg17295733 | 0.527   | 0.779   | -0.251    | 5e-04            | NA                    | Hypomethylated in FP vs FN |
| cg20731469 | 0.211   | 0.487   | -0.275    | 5e-04            | NA                    | Hypomethylated in FP vs FN |
| cg01288155 | 0.376   | 0.626   | -0.250    | 5e-04            | NA                    | Hypomethylated in FP vs FN |
| cg25233271 | 0.358   | 0.650   | -0.292    | 5e-04            | NA                    | Hypomethylated in FP vs FN |
| cg20484832 | 0.460   | 0.754   | -0.294    | 5e-04            | PLCB4                 | Hypomethylated in FP vs FN |
| cg26640927 | 0.313   | 0.590   | -0.277    | 5e-04            | NA                    | Hypomethylated in FP vs FN |
| cg09471343 | 0.416   | 0.693   | -0.276    | 5e-04            | NA                    | Hypomethylated in FP vs FN |
| cg00494919 | 0.445   | 0.743   | -0.298    | 5e-04            | NA                    | Hypomethylated in FP vs FN |
| cg04402351 | 0.561   | 0.814   | -0.254    | 5e-04            | NA                    | Hypomethylated in FP vs FN |
| cg20986875 | 0.216   | 0.531   | -0.315    | 5e-04            | NA                    | Hypomethylated in FP vs FN |

### Supplementary Table 7 (continued)

| Probe      | FP.mean | FN.mean | Mean.diff | Adjusted.P.value | Promoter.related.gene | Category                   |
|------------|---------|---------|-----------|------------------|-----------------------|----------------------------|
| cg22149516 | 0.162   | 0.483   | -0.321    | 5e-04            | SLCO4C1               | Hypomethylated in FP vs FN |
| cg05810177 | 0.232   | 0.490   | -0.258    | 5e-04            | NA                    | Hypomethylated in FP vs FN |
| cg01837410 | 0.071   | 0.391   | -0.320    | 5e-04            | SLCO4C1               | Hypomethylated in FP vs FN |
| cg07745707 | 0.529   | 0.783   | -0.254    | 5e-04            | ZNF469                | Hypomethylated in FP vs FN |
| cg26477573 | 0.356   | 0.703   | -0.347    | 5e-04            | EPHX3                 | Hypomethylated in FP vs FN |
| cg00836940 | 0.426   | 0.679   | -0.253    | 5e-04            | NA                    | Hypomethylated in FP vs FN |
| cg10426464 | 0.079   | 0.371   | -0.292    | 5e-04            | C2CD4B                | Hypomethylated in FP vs FN |
| cg04368094 | 0.175   | 0.429   | -0.254    | 5e-04            | NA                    | Hypomethylated in FP vs FN |
| cg00578511 | 0.336   | 0.589   | -0.253    | 5e-04            | NA                    | Hypomethylated in FP vs FN |
| cg18545283 | 0.371   | 0.643   | -0.272    | 5e-04            | SOHLH2                | Hypomethylated in FP vs FN |
| cg06075311 | 0.200   | 0.453   | -0.254    | 5e-04            | NA                    | Hypomethylated in FP vs FN |
| cg07627639 | 0.351   | 0.608   | -0.257    | 5e-04            | NA                    | Hypomethylated in FP vs FN |
| cg22386311 | 0.344   | 0.598   | -0.254    | 5e-04            | NA                    | Hypomethylated in FP vs FN |
| cg04295612 | 0.424   | 0.695   | -0.271    | 5e-04            | NA                    | Hypomethylated in FP vs FN |
| cg10312211 | 0.141   | 0.404   | -0.263    | 5e-04            | NA                    | Hypomethylated in FP vs FN |
| cg00414384 | 0.462   | 0.759   | -0.297    | 5e-04            | NA                    | Hypomethylated in FP vs FN |
| cg03666053 | 0.171   | 0.422   | -0.251    | 5e-04            | NA                    | Hypomethylated in FP vs FN |
| cg16085553 | 0.416   | 0.701   | -0.285    | 5e-04            | NA                    | Hypomethylated in FP vs FN |
| cg18009322 | 0.237   | 0.503   | -0.266    | 5e-04            | KIF25                 | Hypomethylated in FP vs FN |
| cg18669388 | 0.338   | 0.630   | -0.292    | 5e-04            | SLIT3                 | Hypomethylated in FP vs FN |
| cg12301695 | 0.309   | 0.617   | -0.307    | 5e-04            | SLC38A11              | Hypomethylated in FP vs FN |
| cg02380585 | 0.294   | 0.588   | -0.295    | 5e-04            | SLFN13                | Hypomethylated in FP vs FN |
| cg02461363 | 0.375   | 0.659   | -0.285    | 5e-04            | NA                    | Hypomethylated in FP vs FN |
| cg19829477 | 0.458   | 0.710   | -0.252    | 5e-04            | NA                    | Hypomethylated in FP vs FN |
| cg05127821 | 0.137   | 0.451   | -0.314    | 5e-04            | NA                    | Hypomethylated in FP vs FN |

**Supplementary Table 7 (continued)**

| Probe      | FP.mean | FN.mean | Mean.diff | Adjusted.P.value | Promoter.related.gene | Category                   |
|------------|---------|---------|-----------|------------------|-----------------------|----------------------------|
| cg24161106 | 0.421   | 0.708   | -0.287    | 5e-04            | NA                    | Hypomethylated in FP vs FN |
| cg16636522 | 0.119   | 0.439   | -0.320    | 5e-04            | NA                    | Hypomethylated in FP vs FN |
| cg03115379 | 0.253   | 0.530   | -0.277    | 5e-04            | NA                    | Hypomethylated in FP vs FN |
| cg04018288 | 0.159   | 0.450   | -0.290    | 5e-04            | NA                    | Hypomethylated in FP vs FN |
| cg13631916 | 0.107   | 0.367   | -0.260    | 5e-04            | FAM162B               | Hypomethylated in FP vs FN |
| cg06436573 | 0.349   | 0.619   | -0.269    | 5e-04            | NA                    | Hypomethylated in FP vs FN |
| cg22030457 | 0.207   | 0.509   | -0.302    | 5e-04            | NA                    | Hypomethylated in FP vs FN |
| cg24509810 | 0.243   | 0.563   | -0.320    | 5e-04            | NA                    | Hypomethylated in FP vs FN |
| cg05771369 | 0.370   | 0.657   | -0.287    | 5e-04            | NA                    | Hypomethylated in FP vs FN |
| cg20181887 | 0.234   | 0.509   | -0.275    | 5e-04            | NA                    | Hypomethylated in FP vs FN |
| cg08162976 | 0.409   | 0.660   | -0.251    | 5e-04            | NA                    | Hypomethylated in FP vs FN |
| cg07969300 | 0.498   | 0.761   | -0.264    | 5e-04            | NA                    | Hypomethylated in FP vs FN |
| cg00037400 | 0.212   | 0.505   | -0.292    | 5e-04            | NA                    | Hypomethylated in FP vs FN |
| cg22271305 | 0.184   | 0.515   | -0.332    | 5e-04            | AGBL2                 | Hypomethylated in FP vs FN |
| cg25577842 | 0.167   | 0.492   | -0.325    | 5e-04            | NA                    | Hypomethylated in FP vs FN |
| cg22620221 | 0.119   | 0.499   | -0.380    | 5e-04            | DPP6                  | Hypomethylated in FP vs FN |
| cg06717565 | 0.197   | 0.449   | -0.252    | 5e-04            | NA                    | Hypomethylated in FP vs FN |
| cg08475953 | 0.422   | 0.728   | -0.306    | 5e-04            | NA                    | Hypomethylated in FP vs FN |
| cg18656132 | 0.374   | 0.641   | -0.268    | 5e-04            | NA                    | Hypomethylated in FP vs FN |
| cg02703870 | 0.212   | 0.465   | -0.253    | 5e-04            | SDR42E1               | Hypomethylated in FP vs FN |
| cg10923408 | 0.202   | 0.472   | -0.271    | 5e-04            | C13orf26              | Hypomethylated in FP vs FN |
| cg16645423 | 0.339   | 0.614   | -0.275    | 5e-04            | NA                    | Hypomethylated in FP vs FN |
| cg11009817 | 0.175   | 0.480   | -0.305    | 5e-04            | SLCO4C1               | Hypomethylated in FP vs FN |
| cg10396171 | 0.332   | 0.592   | -0.260    | 5e-04            | NA                    | Hypomethylated in FP vs FN |
| cg24876164 | 0.511   | 0.777   | -0.266    | 5e-04            | NA                    | Hypomethylated in FP vs FN |

**Supplementary Table 7 (continued)**

| Probe      | FP.mean | FN.mean | Mean.diff | Adjusted.P.value | Promoter.related.gene | Category                   |
|------------|---------|---------|-----------|------------------|-----------------------|----------------------------|
| cg06316886 | 0.374   | 0.704   | -0.330    | 5e-04            | NA                    | Hypomethylated in FP vs FN |
| cg06626591 | 0.355   | 0.627   | -0.272    | 5e-04            | NA                    | Hypomethylated in FP vs FN |
| cg08489941 | 0.170   | 0.507   | -0.337    | 5e-04            | NA                    | Hypomethylated in FP vs FN |
| cg03423112 | 0.091   | 0.344   | -0.253    | 5e-04            | CTSF                  | Hypomethylated in FP vs FN |
| cg24312283 | 0.441   | 0.698   | -0.257    | 5e-04            | NA                    | Hypomethylated in FP vs FN |
| cg13273340 | 0.337   | 0.650   | -0.312    | 5e-04            | NA                    | Hypomethylated in FP vs FN |
| cg22177868 | 0.415   | 0.692   | -0.278    | 5e-04            | NA                    | Hypomethylated in FP vs FN |
| cg01871127 | 0.355   | 0.638   | -0.284    | 5e-04            | NA                    | Hypomethylated in FP vs FN |
| cg24188163 | 0.426   | 0.741   | -0.314    | 5e-04            | NA                    | Hypomethylated in FP vs FN |
| cg17566592 | 0.207   | 0.472   | -0.264    | 5e-04            | SF3B5                 | Hypomethylated in FP vs FN |
| cg02960853 | 0.080   | 0.363   | -0.283    | 5e-04            | GPR37                 | Hypomethylated in FP vs FN |
| cg26112661 | 0.199   | 0.507   | -0.309    | 5e-04            | MAGOH                 | Hypomethylated in FP vs FN |
| cg26221796 | 0.349   | 0.634   | -0.285    | 5e-04            | NA                    | Hypomethylated in FP vs FN |
| cg09823154 | 0.264   | 0.542   | -0.278    | 5e-04            | NA                    | Hypomethylated in FP vs FN |
| cg04651137 | 0.469   | 0.773   | -0.304    | 5e-04            | NA                    | Hypomethylated in FP vs FN |
| cg19161124 | 0.202   | 0.532   | -0.330    | 5e-04            | DPP6                  | Hypomethylated in FP vs FN |
| cg23290121 | 0.294   | 0.573   | -0.279    | 5e-04            | NA                    | Hypomethylated in FP vs FN |
| cg18900591 | 0.246   | 0.535   | -0.288    | 5e-04            | SALL4                 | Hypomethylated in FP vs FN |
| cg22435791 | 0.157   | 0.477   | -0.319    | 5e-04            | NA                    | Hypomethylated in FP vs FN |
| cg11262262 | 0.232   | 0.484   | -0.252    | 5e-04            | AATF                  | Hypomethylated in FP vs FN |
| cg08260398 | 0.190   | 0.449   | -0.259    | 5e-04            | NA                    | Hypomethylated in FP vs FN |
| cg06540636 | 0.303   | 0.570   | -0.267    | 5e-04            | NA                    | Hypomethylated in FP vs FN |
| cg07025505 | 0.556   | 0.809   | -0.253    | 5e-04            | NA                    | Hypomethylated in FP vs FN |
| cg27570984 | 0.505   | 0.816   | -0.311    | 5e-04            | NA                    | Hypomethylated in FP vs FN |
| cg13938959 | 0.271   | 0.532   | -0.262    | 5e-04            | NA                    | Hypomethylated in FP vs FN |



### Supplementary Table 7 (continued)

| Probe      | FP.mean | FN.mean | Mean.diff | Adjusted.P.value | Promoter.related.gene | Category                   |
|------------|---------|---------|-----------|------------------|-----------------------|----------------------------|
| cg20521198 | 0.303   | 0.578   | -0.276    | 5e-04            | NA                    | Hypomethylated in FP vs FN |
| cg03532013 | 0.474   | 0.732   | -0.258    | 5e-04            | NA                    | Hypomethylated in FP vs FN |
| cg18749617 | 0.289   | 0.545   | -0.256    | 5e-04            | NA                    | Hypomethylated in FP vs FN |
| cg15936446 | 0.166   | 0.512   | -0.347    | 5e-04            | NA                    | Hypomethylated in FP vs FN |
| cg10675666 | 0.094   | 0.344   | -0.250    | 5e-04            | TRIM4                 | Hypomethylated in FP vs FN |
| cg11904435 | 0.404   | 0.676   | -0.273    | 5e-04            | NA                    | Hypomethylated in FP vs FN |
| cg05266564 | 0.555   | 0.808   | -0.252    | 5e-04            | NA                    | Hypomethylated in FP vs FN |
| cg18713748 | 0.505   | 0.761   | -0.256    | 5e-04            | NA                    | Hypomethylated in FP vs FN |
| cg10093805 | 0.435   | 0.701   | -0.266    | 5e-04            | NA                    | Hypomethylated in FP vs FN |
| cg21092808 | 0.276   | 0.577   | -0.301    | 5e-04            | NA                    | Hypomethylated in FP vs FN |
| cg13827361 | 0.409   | 0.666   | -0.256    | 5e-04            | NA                    | Hypomethylated in FP vs FN |
| cg14094983 | 0.152   | 0.433   | -0.281    | 5e-04            | NA                    | Hypomethylated in FP vs FN |
| cg17945053 | 0.337   | 0.587   | -0.250    | 5e-04            | NA                    | Hypomethylated in FP vs FN |
| cg14600824 | 0.155   | 0.455   | -0.300    | 5e-04            | NA                    | Hypomethylated in FP vs FN |
| cg05936441 | 0.273   | 0.568   | -0.295    | 5e-04            | NA                    | Hypomethylated in FP vs FN |
| cg27517968 | 0.419   | 0.709   | -0.290    | 5e-04            | NA                    | Hypomethylated in FP vs FN |
| cg14686645 | 0.451   | 0.739   | -0.287    | 5e-04            | NA                    | Hypomethylated in FP vs FN |
| cg11957331 | 0.096   | 0.400   | -0.304    | 5e-04            | NA                    | Hypomethylated in FP vs FN |
| cg12527684 | 0.228   | 0.553   | -0.325    | 5e-04            | EIF4E                 | Hypomethylated in FP vs FN |
| cg20456258 | 0.255   | 0.580   | -0.325    | 5e-04            | NA                    | Hypomethylated in FP vs FN |
| cg17118262 | 0.295   | 0.564   | -0.269    | 5e-04            | CCL1                  | Hypomethylated in FP vs FN |
| cg07005055 | 0.130   | 0.411   | -0.281    | 5e-04            | NA                    | Hypomethylated in FP vs FN |
| cg07434260 | 0.261   | 0.532   | -0.271    | 5e-04            | AP1M2                 | Hypomethylated in FP vs FN |
| cg20965743 | 0.382   | 0.706   | -0.324    | 5e-04            | NA                    | Hypomethylated in FP vs FN |
| cg24228040 | 0.325   | 0.655   | -0.330    | 5e-04            | NA                    | Hypomethylated in FP vs FN |

### Supplementary Table 7 (continued)

| Probe      | FP.mean | FN.mean | Mean.diff | Adjusted.P.value | Promoter.related.gene | Category                   |
|------------|---------|---------|-----------|------------------|-----------------------|----------------------------|
| cg23969274 | 0.314   | 0.580   | -0.267    | 5e-04            | NA                    | Hypomethylated in FP vs FN |
| cg14298457 | 0.555   | 0.817   | -0.262    | 5e-04            | NA                    | Hypomethylated in FP vs FN |
| cg21245092 | 0.315   | 0.573   | -0.258    | 5e-04            | C14orf115             | Hypomethylated in FP vs FN |
| cg26004771 | 0.522   | 0.810   | -0.288    | 5e-04            | NA                    | Hypomethylated in FP vs FN |
| cg22747746 | 0.101   | 0.455   | -0.353    | 5e-04            | NKX2-6                | Hypomethylated in FP vs FN |
| cg02460251 | 0.291   | 0.626   | -0.335    | 5e-04            | NA                    | Hypomethylated in FP vs FN |
| cg21442419 | 0.358   | 0.632   | -0.274    | 5e-04            | NA                    | Hypomethylated in FP vs FN |
| cg26501049 | 0.370   | 0.624   | -0.254    | 5e-04            | FAM184A               | Hypomethylated in FP vs FN |
| cg24624505 | 0.328   | 0.581   | -0.253    | 5e-04            | NA                    | Hypomethylated in FP vs FN |
| cg04766779 | 0.334   | 0.599   | -0.265    | 5e-04            | NA                    | Hypomethylated in FP vs FN |
| cg16005271 | 0.357   | 0.654   | -0.297    | 5e-04            | NA                    | Hypomethylated in FP vs FN |
| cg12037450 | 0.292   | 0.568   | -0.276    | 5e-04            | NA                    | Hypomethylated in FP vs FN |
| cg18395917 | 0.226   | 0.615   | -0.389    | 5e-04            | NA                    | Hypomethylated in FP vs FN |
| cg15712559 | 0.170   | 0.481   | -0.310    | 5e-04            | NA                    | Hypomethylated in FP vs FN |
| cg03855388 | 0.549   | 0.842   | -0.293    | 5e-04            | NA                    | Hypomethylated in FP vs FN |
| cg14567877 | 0.376   | 0.630   | -0.254    | 5e-04            | NA                    | Hypomethylated in FP vs FN |
| cg12230728 | 0.203   | 0.517   | -0.315    | 6e-04            | NA                    | Hypomethylated in FP vs FN |
| cg00017461 | 0.349   | 0.604   | -0.255    | 6e-04            | OSM                   | Hypomethylated in FP vs FN |
| cg01324550 | 0.283   | 0.541   | -0.258    | 6e-04            | NA                    | Hypomethylated in FP vs FN |
| cg21476299 | 0.164   | 0.415   | -0.252    | 6e-04            | TNFSF11               | Hypomethylated in FP vs FN |
| cg06911121 | 0.176   | 0.463   | -0.287    | 6e-04            | TBX5                  | Hypomethylated in FP vs FN |
| cg12109797 | 0.296   | 0.594   | -0.298    | 6e-04            | NA                    | Hypomethylated in FP vs FN |
| cg03431846 | 0.197   | 0.505   | -0.307    | 6e-04            | REC8                  | Hypomethylated in FP vs FN |
| cg00504705 | 0.359   | 0.638   | -0.279    | 6e-04            | PCDHA8                | Hypomethylated in FP vs FN |
| cg15065622 | 0.228   | 0.484   | -0.257    | 6e-04            | FAM59A                | Hypomethylated in FP vs FN |

### Supplementary Table 7 (continued)

| Probe      | FP.mean | FN.mean | Mean.diff | Adjusted.P.value | Promoter.related.gene | Category                   |
|------------|---------|---------|-----------|------------------|-----------------------|----------------------------|
| cg09730170 | 0.376   | 0.636   | -0.259    | 6e-04            | CST9                  | Hypomethylated in FP vs FN |
| cg09997676 | 0.281   | 0.553   | -0.271    | 6e-04            | PHF11                 | Hypomethylated in FP vs FN |
| cg12752420 | 0.519   | 0.771   | -0.252    | 6e-04            | C1orf210              | Hypomethylated in FP vs FN |
| cg16654595 | 0.339   | 0.639   | -0.300    | 6e-04            | NA                    | Hypomethylated in FP vs FN |
| cg18417622 | 0.304   | 0.623   | -0.319    | 6e-04            | NA                    | Hypomethylated in FP vs FN |
| cg27049129 | 0.608   | 0.875   | -0.267    | 6e-04            | NA                    | Hypomethylated in FP vs FN |
| cg14582501 | 0.243   | 0.523   | -0.280    | 6e-04            | NA                    | Hypomethylated in FP vs FN |
| cg24894584 | 0.244   | 0.531   | -0.287    | 6e-04            | NA                    | Hypomethylated in FP vs FN |
| cg26149485 | 0.323   | 0.576   | -0.253    | 6e-04            | TIMM13                | Hypomethylated in FP vs FN |
| cg04001333 | 0.182   | 0.455   | -0.273    | 6e-04            | FLVCR2                | Hypomethylated in FP vs FN |
| cg22849665 | 0.556   | 0.815   | -0.259    | 6e-04            | NA                    | Hypomethylated in FP vs FN |
| cg04527612 | 0.415   | 0.674   | -0.259    | 6e-04            | NA                    | Hypomethylated in FP vs FN |
| cg02758612 | 0.177   | 0.512   | -0.335    | 6e-04            | NA                    | Hypomethylated in FP vs FN |
| cg03031839 | 0.430   | 0.693   | -0.263    | 6e-04            | NA                    | Hypomethylated in FP vs FN |
| cg16425038 | 0.197   | 0.543   | -0.346    | 6e-04            | REC8                  | Hypomethylated in FP vs FN |
| cg00058515 | 0.293   | 0.560   | -0.267    | 6e-04            | NA                    | Hypomethylated in FP vs FN |
| cg07586008 | 0.274   | 0.556   | -0.281    | 6e-04            | NA                    | Hypomethylated in FP vs FN |
| cg00963169 | 0.093   | 0.428   | -0.335    | 6e-04            | NA                    | Hypomethylated in FP vs FN |
| cg11118422 | 0.326   | 0.627   | -0.302    | 6e-04            | NA                    | Hypomethylated in FP vs FN |
| cg04921109 | 0.379   | 0.647   | -0.269    | 6e-04            | NA                    | Hypomethylated in FP vs FN |
| cg08299063 | 0.312   | 0.582   | -0.270    | 6e-04            | NA                    | Hypomethylated in FP vs FN |
| cg19707326 | 0.375   | 0.628   | -0.254    | 6e-04            | NA                    | Hypomethylated in FP vs FN |
| cg04123310 | 0.566   | 0.825   | -0.259    | 6e-04            | NA                    | Hypomethylated in FP vs FN |
| cg18861572 | 0.198   | 0.450   | -0.252    | 6e-04            | NA                    | Hypomethylated in FP vs FN |
| cg07741162 | 0.355   | 0.634   | -0.279    | 6e-04            | NA                    | Hypomethylated in FP vs FN |

### Supplementary Table 7 (continued)

| Probe      | FP.mean | FN.mean | Mean.diff | Adjusted.P.value | Promoter.related.gene | Category                   |
|------------|---------|---------|-----------|------------------|-----------------------|----------------------------|
| cg19624318 | 0.410   | 0.670   | -0.260    | 6e-04            | NA                    | Hypomethylated in FP vs FN |
| cg08827307 | 0.249   | 0.587   | -0.338    | 6e-04            | ADAM32                | Hypomethylated in FP vs FN |
| cg10693616 | 0.096   | 0.384   | -0.288    | 6e-04            | NA                    | Hypomethylated in FP vs FN |
| cg01387036 | 0.280   | 0.548   | -0.268    | 6e-04            | CCL1                  | Hypomethylated in FP vs FN |
| cg02309230 | 0.408   | 0.659   | -0.251    | 6e-04            | NA                    | Hypomethylated in FP vs FN |
| cg17507887 | 0.206   | 0.484   | -0.277    | 6e-04            | TFAP2B                | Hypomethylated in FP vs FN |
| cg14451926 | 0.279   | 0.603   | -0.324    | 6e-04            | NA                    | Hypomethylated in FP vs FN |
| cg14530382 | 0.141   | 0.449   | -0.308    | 6e-04            | NA                    | Hypomethylated in FP vs FN |
| cg27521476 | 0.486   | 0.746   | -0.260    | 6e-04            | NA                    | Hypomethylated in FP vs FN |
| cg05139788 | 0.396   | 0.680   | -0.284    | 6e-04            | NA                    | Hypomethylated in FP vs FN |
| cg15989981 | 0.247   | 0.529   | -0.283    | 6e-04            | GJA3                  | Hypomethylated in FP vs FN |
| cg19694519 | 0.526   | 0.792   | -0.265    | 6e-04            | NA                    | Hypomethylated in FP vs FN |
| cg02635482 | 0.332   | 0.639   | -0.307    | 6e-04            | NA                    | Hypomethylated in FP vs FN |
| cg13451356 | 0.174   | 0.468   | -0.295    | 6e-04            | NA                    | Hypomethylated in FP vs FN |
| cg10282319 | 0.399   | 0.654   | -0.255    | 6e-04            | NA                    | Hypomethylated in FP vs FN |
| cg26786037 | 0.419   | 0.677   | -0.258    | 6e-04            | MYO1H                 | Hypomethylated in FP vs FN |
| cg02587673 | 0.448   | 0.700   | -0.253    | 6e-04            | NA                    | Hypomethylated in FP vs FN |
| cg06783429 | 0.436   | 0.743   | -0.307    | 6e-04            | NA                    | Hypomethylated in FP vs FN |
| cg19211853 | 0.356   | 0.644   | -0.289    | 6e-04            | NA                    | Hypomethylated in FP vs FN |
| cg24879782 | 0.582   | 0.836   | -0.254    | 6e-04            | NA                    | Hypomethylated in FP vs FN |
| cg08835464 | 0.358   | 0.620   | -0.263    | 6e-04            | NA                    | Hypomethylated in FP vs FN |
| cg04993112 | 0.379   | 0.643   | -0.264    | 6e-04            | SPRR2A                | Hypomethylated in FP vs FN |
| cg22816857 | 0.382   | 0.689   | -0.307    | 6e-04            | NA                    | Hypomethylated in FP vs FN |
| cg10821845 | 0.116   | 0.421   | -0.305    | 6e-04            | NA                    | Hypomethylated in FP vs FN |
| cg21300895 | 0.355   | 0.619   | -0.263    | 6e-04            | MYEOV2                | Hypomethylated in FP vs FN |

### Supplementary Table 7 (continued)

| Probe      | FP.mean | FN.mean | Mean.diff | Adjusted.P.value | Promoter.related.gene | Category                   |
|------------|---------|---------|-----------|------------------|-----------------------|----------------------------|
| cg02079551 | 0.390   | 0.660   | -0.270    | 6e-04            | NA                    | Hypomethylated in FP vs FN |
| cg22812413 | 0.384   | 0.634   | -0.250    | 6e-04            | NA                    | Hypomethylated in FP vs FN |
| cg05965392 | 0.140   | 0.415   | -0.275    | 6e-04            | FAM150A               | Hypomethylated in FP vs FN |
| cg24151995 | 0.206   | 0.477   | -0.271    | 6e-04            | NA                    | Hypomethylated in FP vs FN |
| cg22019177 | 0.404   | 0.661   | -0.257    | 6e-04            | NA                    | Hypomethylated in FP vs FN |
| cg05120716 | 0.332   | 0.603   | -0.272    | 6e-04            | NA                    | Hypomethylated in FP vs FN |
| cg02448276 | 0.082   | 0.334   | -0.251    | 6e-04            | NA                    | Hypomethylated in FP vs FN |
| cg27064337 | 0.346   | 0.623   | -0.277    | 6e-04            | NA                    | Hypomethylated in FP vs FN |
| cg24166450 | 0.307   | 0.574   | -0.268    | 6e-04            | NA                    | Hypomethylated in FP vs FN |
| cg26882164 | 0.361   | 0.658   | -0.297    | 6e-04            | NA                    | Hypomethylated in FP vs FN |
| cg06139341 | 0.210   | 0.485   | -0.275    | 6e-04            | NA                    | Hypomethylated in FP vs FN |
| cg21932672 | 0.477   | 0.753   | -0.276    | 6e-04            | NA                    | Hypomethylated in FP vs FN |
| cg05879498 | 0.169   | 0.477   | -0.307    | 6e-04            | SCAND3                | Hypomethylated in FP vs FN |
| cg03650429 | 0.306   | 0.628   | -0.322    | 6e-04            | NA                    | Hypomethylated in FP vs FN |
| cg13921444 | 0.326   | 0.597   | -0.271    | 6e-04            | SORBS2                | Hypomethylated in FP vs FN |
| cg14527456 | 0.140   | 0.484   | -0.344    | 6e-04            | NA                    | Hypomethylated in FP vs FN |
| cg03099208 | 0.314   | 0.608   | -0.294    | 6e-04            | NA                    | Hypomethylated in FP vs FN |
| cg24740868 | 0.202   | 0.509   | -0.307    | 6e-04            | C1orf87               | Hypomethylated in FP vs FN |
| cg15999833 | 0.443   | 0.730   | -0.288    | 6e-04            | NA                    | Hypomethylated in FP vs FN |
| cg04171235 | 0.474   | 0.743   | -0.269    | 6e-04            | NA                    | Hypomethylated in FP vs FN |
| cg03903246 | 0.408   | 0.660   | -0.252    | 6e-04            | NA                    | Hypomethylated in FP vs FN |
| cg09696159 | 0.485   | 0.766   | -0.281    | 6e-04            | NA                    | Hypomethylated in FP vs FN |
| cg03692651 | 0.287   | 0.666   | -0.380    | 6e-04            | NA                    | Hypomethylated in FP vs FN |
| cg16081281 | 0.204   | 0.462   | -0.257    | 6e-04            | NA                    | Hypomethylated in FP vs FN |
| cg03287940 | 0.369   | 0.680   | -0.311    | 6e-04            | THRB                  | Hypomethylated in FP vs FN |

### Supplementary Table 7 (continued)

| Probe      | FP.mean | FN.mean | Mean.diff | Adjusted.P.value | Promoter.related.gene | Category                   |
|------------|---------|---------|-----------|------------------|-----------------------|----------------------------|
| cg06686742 | 0.501   | 0.757   | -0.256    | 6e-04            | LASS4                 | Hypomethylated in FP vs FN |
| cg08050656 | 0.340   | 0.605   | -0.265    | 6e-04            | SERPINB11             | Hypomethylated in FP vs FN |
| cg24926465 | 0.362   | 0.631   | -0.268    | 6e-04            | KCNAB1                | Hypomethylated in FP vs FN |
| cg06294700 | 0.352   | 0.647   | -0.294    | 6e-04            | NA                    | Hypomethylated in FP vs FN |
| cg04211018 | 0.415   | 0.700   | -0.285    | 6e-04            | NA                    | Hypomethylated in FP vs FN |
| cg11282657 | 0.127   | 0.402   | -0.276    | 6e-04            | NA                    | Hypomethylated in FP vs FN |
| cg15339231 | 0.259   | 0.571   | -0.312    | 6e-04            | NA                    | Hypomethylated in FP vs FN |
| cg04217706 | 0.329   | 0.645   | -0.316    | 6e-04            | NA                    | Hypomethylated in FP vs FN |
| cg08214423 | 0.204   | 0.529   | -0.325    | 6e-04            | NA                    | Hypomethylated in FP vs FN |
| cg22669623 | 0.113   | 0.462   | -0.349    | 6e-04            | NA                    | Hypomethylated in FP vs FN |
| cg02596153 | 0.192   | 0.499   | -0.308    | 6e-04            | NA                    | Hypomethylated in FP vs FN |
| cg15963070 | 0.437   | 0.704   | -0.267    | 6e-04            | NA                    | Hypomethylated in FP vs FN |
| cg17366294 | 0.221   | 0.552   | -0.331    | 6e-04            | C4orf37               | Hypomethylated in FP vs FN |
| cg05671350 | 0.317   | 0.598   | -0.280    | 6e-04            | NA                    | Hypomethylated in FP vs FN |
| cg18556834 | 0.176   | 0.479   | -0.303    | 6e-04            | REC8                  | Hypomethylated in FP vs FN |
| cg05096161 | 0.215   | 0.488   | -0.273    | 6e-04            | MIR152                | Hypomethylated in FP vs FN |
| cg07270021 | 0.526   | 0.778   | -0.252    | 6e-04            | NA                    | Hypomethylated in FP vs FN |
| cg09494646 | 0.431   | 0.687   | -0.256    | 6e-04            | MIR33B                | Hypomethylated in FP vs FN |
| cg03094481 | 0.082   | 0.371   | -0.289    | 6e-04            | NA                    | Hypomethylated in FP vs FN |
| cg03816707 | 0.313   | 0.611   | -0.298    | 6e-04            | NA                    | Hypomethylated in FP vs FN |
| cg24404630 | 0.166   | 0.458   | -0.291    | 6e-04            | C18orf1               | Hypomethylated in FP vs FN |
| cg16964348 | 0.102   | 0.431   | -0.329    | 6e-04            | NPY                   | Hypomethylated in FP vs FN |
| cg08712336 | 0.260   | 0.529   | -0.269    | 6e-04            | NA                    | Hypomethylated in FP vs FN |
| cg05988147 | 0.451   | 0.710   | -0.259    | 6e-04            | NA                    | Hypomethylated in FP vs FN |
| cg20892260 | 0.194   | 0.523   | -0.329    | 6e-04            | NKX2-6                | Hypomethylated in FP vs FN |

### Supplementary Table 7 (continued)

| Probe      | FP.mean | FN.mean | Mean.diff | Adjusted.P.value | Promoter.related.gene | Category                   |
|------------|---------|---------|-----------|------------------|-----------------------|----------------------------|
| cg20308679 | 0.098   | 0.386   | -0.288    | 6e-04            | FRZB                  | Hypomethylated in FP vs FN |
| cg01656244 | 0.427   | 0.687   | -0.261    | 6e-04            | NA                    | Hypomethylated in FP vs FN |
| cg04724807 | 0.361   | 0.617   | -0.256    | 6e-04            | NA                    | Hypomethylated in FP vs FN |
| cg02194223 | 0.155   | 0.433   | -0.277    | 6e-04            | NA                    | Hypomethylated in FP vs FN |
| cg16654603 | 0.266   | 0.519   | -0.253    | 6e-04            | NA                    | Hypomethylated in FP vs FN |
| cg12161887 | 0.476   | 0.741   | -0.265    | 7e-04            | NA                    | Hypomethylated in FP vs FN |
| cg01682021 | 0.123   | 0.421   | -0.297    | 7e-04            | LOC441046             | Hypomethylated in FP vs FN |
| cg17391194 | 0.412   | 0.702   | -0.289    | 7e-04            | NA                    | Hypomethylated in FP vs FN |
| cg22851691 | 0.261   | 0.556   | -0.294    | 7e-04            | NA                    | Hypomethylated in FP vs FN |
| cg02179455 | 0.143   | 0.411   | -0.268    | 7e-04            | NA                    | Hypomethylated in FP vs FN |
| cg10199250 | 0.237   | 0.523   | -0.285    | 7e-04            | LVRN                  | Hypomethylated in FP vs FN |
| cg12193927 | 0.176   | 0.429   | -0.254    | 7e-04            | PCDHB10               | Hypomethylated in FP vs FN |
| cg18524934 | 0.295   | 0.616   | -0.321    | 7e-04            | NA                    | Hypomethylated in FP vs FN |
| cg14508358 | 0.266   | 0.594   | -0.329    | 7e-04            | NA                    | Hypomethylated in FP vs FN |
| cg09601584 | 0.372   | 0.651   | -0.280    | 7e-04            | NA                    | Hypomethylated in FP vs FN |
| cg14233507 | 0.237   | 0.510   | -0.273    | 7e-04            | SKAP1                 | Hypomethylated in FP vs FN |
| cg01678472 | 0.256   | 0.522   | -0.266    | 7e-04            | NA                    | Hypomethylated in FP vs FN |
| cg26578923 | 0.113   | 0.414   | -0.300    | 7e-04            | GNMT                  | Hypomethylated in FP vs FN |
| cg08311935 | 0.244   | 0.532   | -0.288    | 7e-04            | NA                    | Hypomethylated in FP vs FN |
| cg06009215 | 0.394   | 0.669   | -0.275    | 7e-04            | NA                    | Hypomethylated in FP vs FN |
| cg20171396 | 0.251   | 0.549   | -0.298    | 7e-04            | NA                    | Hypomethylated in FP vs FN |
| cg21429408 | 0.236   | 0.502   | -0.266    | 7e-04            | NA                    | Hypomethylated in FP vs FN |
| cg27587935 | 0.424   | 0.678   | -0.253    | 7e-04            | NA                    | Hypomethylated in FP vs FN |
| cg16290522 | 0.469   | 0.721   | -0.253    | 7e-04            | NA                    | Hypomethylated in FP vs FN |
| cg02098786 | 0.269   | 0.574   | -0.305    | 7e-04            | NA                    | Hypomethylated in FP vs FN |

**Supplementary Table 7 (continued)**

| Probe      | FP.mean | FN.mean | Mean.diff | Adjusted.P.value | Promoter.related.gene | Category                   |
|------------|---------|---------|-----------|------------------|-----------------------|----------------------------|
| cg12782180 | 0.446   | 0.750   | -0.304    | 7e-04            | LEP                   | Hypomethylated in FP vs FN |
| cg10786645 | 0.202   | 0.484   | -0.282    | 7e-04            | NA                    | Hypomethylated in FP vs FN |
| cg10746542 | 0.217   | 0.502   | -0.285    | 7e-04            | NA                    | Hypomethylated in FP vs FN |
| cg09938213 | 0.247   | 0.515   | -0.269    | 7e-04            | NA                    | Hypomethylated in FP vs FN |
| cg05639912 | 0.092   | 0.403   | -0.311    | 7e-04            | NA                    | Hypomethylated in FP vs FN |
| cg22926923 | 0.496   | 0.759   | -0.264    | 7e-04            | NA                    | Hypomethylated in FP vs FN |
| cg21623566 | 0.154   | 0.427   | -0.273    | 7e-04            | NA                    | Hypomethylated in FP vs FN |
| cg01214458 | 0.464   | 0.731   | -0.267    | 7e-04            | MN1                   | Hypomethylated in FP vs FN |
| cg24109679 | 0.129   | 0.389   | -0.260    | 7e-04            | FLJ11235              | Hypomethylated in FP vs FN |
| cg22489957 | 0.395   | 0.656   | -0.261    | 7e-04            | NA                    | Hypomethylated in FP vs FN |
| cg20987610 | 0.397   | 0.651   | -0.253    | 7e-04            | CDH17                 | Hypomethylated in FP vs FN |
| cg03444122 | 0.478   | 0.735   | -0.257    | 7e-04            | TRIML1                | Hypomethylated in FP vs FN |
| cg23642130 | 0.208   | 0.497   | -0.289    | 7e-04            | NA                    | Hypomethylated in FP vs FN |
| cg17536595 | 0.262   | 0.612   | -0.350    | 7e-04            | RSPH9                 | Hypomethylated in FP vs FN |
| cg24023487 | 0.295   | 0.595   | -0.301    | 7e-04            | SPTLC3                | Hypomethylated in FP vs FN |
| cg25793597 | 0.538   | 0.789   | -0.250    | 7e-04            | NA                    | Hypomethylated in FP vs FN |
| cg07960922 | 0.431   | 0.700   | -0.269    | 7e-04            | NA                    | Hypomethylated in FP vs FN |
| cg14486477 | 0.313   | 0.578   | -0.265    | 7e-04            | NA                    | Hypomethylated in FP vs FN |
| cg04766371 | 0.293   | 0.609   | -0.316    | 7e-04            | NA                    | Hypomethylated in FP vs FN |
| cg17439009 | 0.385   | 0.669   | -0.283    | 7e-04            | ATF7IP                | Hypomethylated in FP vs FN |
| cg18180107 | 0.141   | 0.434   | -0.294    | 7e-04            | C4orf37               | Hypomethylated in FP vs FN |
| cg27089768 | 0.177   | 0.468   | -0.291    | 7e-04            | TCL1A                 | Hypomethylated in FP vs FN |
| cg00130947 | 0.466   | 0.721   | -0.255    | 7e-04            | NA                    | Hypomethylated in FP vs FN |
| cg22473637 | 0.245   | 0.545   | -0.300    | 7e-04            | MCHR2                 | Hypomethylated in FP vs FN |
| cg11658060 | 0.371   | 0.621   | -0.250    | 7e-04            | NA                    | Hypomethylated in FP vs FN |



### Supplementary Table 7 (continued)

| Probe      | FP.mean | FN.mean | Mean.diff | Adjusted.P.value | Promoter.related.gene | Category                   |
|------------|---------|---------|-----------|------------------|-----------------------|----------------------------|
| cg08268099 | 0.361   | 0.612   | -0.251    | 7e-04            | OLFM1                 | Hypomethylated in FP vs FN |
| cg09852127 | 0.447   | 0.705   | -0.258    | 7e-04            | PCDHA12               | Hypomethylated in FP vs FN |
| cg00991744 | 0.404   | 0.683   | -0.279    | 7e-04            | PDZRN4                | Hypomethylated in FP vs FN |
| cg10997479 | 0.304   | 0.565   | -0.261    | 7e-04            | NA                    | Hypomethylated in FP vs FN |
| cg11862714 | 0.522   | 0.785   | -0.263    | 7e-04            | NA                    | Hypomethylated in FP vs FN |
| cg07651720 | 0.337   | 0.604   | -0.267    | 7e-04            | NA                    | Hypomethylated in FP vs FN |
| cg01313176 | 0.335   | 0.601   | -0.266    | 7e-04            | NA                    | Hypomethylated in FP vs FN |
| cg02983950 | 0.127   | 0.460   | -0.333    | 7e-04            | NA                    | Hypomethylated in FP vs FN |
| cg14200170 | 0.119   | 0.408   | -0.290    | 7e-04            | ADCYAP1               | Hypomethylated in FP vs FN |
| cg06495961 | 0.283   | 0.606   | -0.323    | 7e-04            | DPP6                  | Hypomethylated in FP vs FN |
| cg07655479 | 0.146   | 0.436   | -0.291    | 7e-04            | LOC441046             | Hypomethylated in FP vs FN |
| cg07523753 | 0.392   | 0.661   | -0.268    | 7e-04            | NA                    | Hypomethylated in FP vs FN |
| cg20594809 | 0.173   | 0.431   | -0.258    | 7e-04            | NA                    | Hypomethylated in FP vs FN |
| cg26076858 | 0.470   | 0.763   | -0.293    | 7e-04            | NA                    | Hypomethylated in FP vs FN |
| cg24488311 | 0.408   | 0.666   | -0.258    | 7e-04            | NA                    | Hypomethylated in FP vs FN |
| cg16053651 | 0.508   | 0.769   | -0.261    | 7e-04            | NA                    | Hypomethylated in FP vs FN |
| cg22040202 | 0.322   | 0.586   | -0.264    | 7e-04            | NA                    | Hypomethylated in FP vs FN |
| cg15489294 | 0.273   | 0.557   | -0.284    | 7e-04            | LVRN                  | Hypomethylated in FP vs FN |
| cg11485595 | 0.139   | 0.420   | -0.281    | 7e-04            | NA                    | Hypomethylated in FP vs FN |
| cg10420161 | 0.371   | 0.655   | -0.284    | 7e-04            | NA                    | Hypomethylated in FP vs FN |
| cg08973102 | 0.139   | 0.409   | -0.270    | 7e-04            | GCA                   | Hypomethylated in FP vs FN |
| cg13716585 | 0.513   | 0.769   | -0.256    | 7e-04            | NA                    | Hypomethylated in FP vs FN |
| cg21305471 | 0.091   | 0.358   | -0.267    | 7e-04            | ZNF671                | Hypomethylated in FP vs FN |
| cg07078225 | 0.339   | 0.710   | -0.371    | 7e-04            | NA                    | Hypomethylated in FP vs FN |
| cg07114810 | 0.376   | 0.634   | -0.258    | 7e-04            | NA                    | Hypomethylated in FP vs FN |

### Supplementary Table 7 (continued)

| Probe      | FP.mean | FN.mean | Mean.diff | Adjusted.P.value | Promoter.related.gene | Category                   |
|------------|---------|---------|-----------|------------------|-----------------------|----------------------------|
| cg26668989 | 0.265   | 0.536   | -0.271    | 7e-04            | NA                    | Hypomethylated in FP vs FN |
| cg01214340 | 0.347   | 0.682   | -0.335    | 7e-04            | PHF11                 | Hypomethylated in FP vs FN |
| cg15090005 | 0.179   | 0.479   | -0.300    | 7e-04            | NA                    | Hypomethylated in FP vs FN |
| cg16290689 | 0.232   | 0.519   | -0.287    | 7e-04            | C13orf26              | Hypomethylated in FP vs FN |
| cg09686443 | 0.141   | 0.433   | -0.292    | 7e-04            | CCDC37                | Hypomethylated in FP vs FN |
| cg20180247 | 0.158   | 0.419   | -0.261    | 7e-04            | NA                    | Hypomethylated in FP vs FN |
| cg18051527 | 0.434   | 0.690   | -0.256    | 7e-04            | NA                    | Hypomethylated in FP vs FN |
| cg08791424 | 0.565   | 0.826   | -0.261    | 7e-04            | NA                    | Hypomethylated in FP vs FN |
| cg02438026 | 0.281   | 0.539   | -0.257    | 7e-04            | NA                    | Hypomethylated in FP vs FN |
| cg06685724 | 0.265   | 0.545   | -0.280    | 7e-04            | NA                    | Hypomethylated in FP vs FN |
| cg09065113 | 0.314   | 0.574   | -0.260    | 7e-04            | NA                    | Hypomethylated in FP vs FN |
| cg16536329 | 0.095   | 0.367   | -0.272    | 7e-04            | ZNF454                | Hypomethylated in FP vs FN |
| cg15412446 | 0.162   | 0.440   | -0.278    | 7e-04            | NA                    | Hypomethylated in FP vs FN |
| cg25751895 | 0.142   | 0.467   | -0.325    | 7e-04            | GCA                   | Hypomethylated in FP vs FN |
| cg00109131 | 0.423   | 0.676   | -0.253    | 7e-04            | SLC36A3               | Hypomethylated in FP vs FN |
| cg00884334 | 0.142   | 0.433   | -0.290    | 7e-04            | NA                    | Hypomethylated in FP vs FN |
| cg06110297 | 0.239   | 0.497   | -0.258    | 7e-04            | NA                    | Hypomethylated in FP vs FN |
| cg13923371 | 0.289   | 0.582   | -0.293    | 7e-04            | NA                    | Hypomethylated in FP vs FN |
| cg18068140 | 0.499   | 0.765   | -0.267    | 7e-04            | NHLRC1                | Hypomethylated in FP vs FN |
| cg07339393 | 0.591   | 0.842   | -0.250    | 7e-04            | NA                    | Hypomethylated in FP vs FN |
| cg01524278 | 0.484   | 0.745   | -0.261    | 7e-04            | NA                    | Hypomethylated in FP vs FN |
| cg17099568 | 0.399   | 0.666   | -0.267    | 7e-04            | NA                    | Hypomethylated in FP vs FN |
| cg20186067 | 0.281   | 0.607   | -0.326    | 7e-04            | NA                    | Hypomethylated in FP vs FN |
| cg11707310 | 0.443   | 0.737   | -0.294    | 7e-04            | NA                    | Hypomethylated in FP vs FN |
| cg17918326 | 0.497   | 0.759   | -0.262    | 7e-04            | C20orf4               | Hypomethylated in FP vs FN |

### Supplementary Table 7 (continued)

| Probe      | FP.mean | FN.mean | Mean.diff | Adjusted.P.value | Promoter.related.gene | Category                   |
|------------|---------|---------|-----------|------------------|-----------------------|----------------------------|
| cg25017620 | 0.177   | 0.459   | -0.282    | 7e-04            | NA                    | Hypomethylated in FP vs FN |
| cg14115730 | 0.173   | 0.490   | -0.317    | 7e-04            | NA                    | Hypomethylated in FP vs FN |
| cg10579530 | 0.336   | 0.598   | -0.262    | 7e-04            | NA                    | Hypomethylated in FP vs FN |
| cg25366639 | 0.368   | 0.642   | -0.274    | 7e-04            | NA                    | Hypomethylated in FP vs FN |
| cg21729992 | 0.137   | 0.426   | -0.289    | 7e-04            | NA                    | Hypomethylated in FP vs FN |
| cg19989295 | 0.163   | 0.492   | -0.330    | 7e-04            | REC8                  | Hypomethylated in FP vs FN |
| cg00876501 | 0.192   | 0.498   | -0.306    | 7e-04            | EIF4E                 | Hypomethylated in FP vs FN |
| cg14270650 | 0.456   | 0.722   | -0.266    | 7e-04            | NA                    | Hypomethylated in FP vs FN |
| cg01073463 | 0.367   | 0.654   | -0.288    | 7e-04            | NA                    | Hypomethylated in FP vs FN |
| cg24874602 | 0.394   | 0.695   | -0.301    | 7e-04            | NA                    | Hypomethylated in FP vs FN |
| cg07823827 | 0.351   | 0.617   | -0.266    | 7e-04            | NA                    | Hypomethylated in FP vs FN |
| cg10477905 | 0.320   | 0.586   | -0.265    | 7e-04            | NA                    | Hypomethylated in FP vs FN |
| cg00014830 | 0.363   | 0.660   | -0.297    | 7e-04            | NA                    | Hypomethylated in FP vs FN |
| cg02376703 | 0.481   | 0.761   | -0.280    | 7e-04            | EPHA1                 | Hypomethylated in FP vs FN |
| cg04049008 | 0.405   | 0.671   | -0.266    | 8e-04            | NA                    | Hypomethylated in FP vs FN |
| cg09410453 | 0.362   | 0.616   | -0.254    | 8e-04            | NA                    | Hypomethylated in FP vs FN |
| cg23981871 | 0.488   | 0.750   | -0.263    | 8e-04            | HOXD3                 | Hypomethylated in FP vs FN |
| cg23087108 | 0.380   | 0.692   | -0.312    | 8e-04            | NA                    | Hypomethylated in FP vs FN |
| cg00017842 | 0.248   | 0.558   | -0.310    | 8e-04            | NA                    | Hypomethylated in FP vs FN |
| cg00424169 | 0.256   | 0.541   | -0.285    | 8e-04            | C13orf26              | Hypomethylated in FP vs FN |
| cg24603408 | 0.268   | 0.532   | -0.264    | 8e-04            | NA                    | Hypomethylated in FP vs FN |
| cg13969327 | 0.331   | 0.587   | -0.256    | 8e-04            | NA                    | Hypomethylated in FP vs FN |
| cg26304948 | 0.387   | 0.651   | -0.264    | 8e-04            | NA                    | Hypomethylated in FP vs FN |
| cg19246110 | 0.087   | 0.400   | -0.313    | 8e-04            | ZNF671                | Hypomethylated in FP vs FN |
| cg02273398 | 0.204   | 0.530   | -0.326    | 8e-04            | NA                    | Hypomethylated in FP vs FN |

### Supplementary Table 7 (continued)

| Probe      | FP.mean | FN.mean | Mean.diff | Adjusted.P.value | Promoter.related.gene | Category                   |
|------------|---------|---------|-----------|------------------|-----------------------|----------------------------|
| cg23113350 | 0.324   | 0.578   | -0.254    | 8e-04            | TGFBR3                | Hypomethylated in FP vs FN |
| cg15040157 | 0.173   | 0.425   | -0.251    | 8e-04            | NA                    | Hypomethylated in FP vs FN |
| cg27622506 | 0.255   | 0.579   | -0.324    | 8e-04            | THRB                  | Hypomethylated in FP vs FN |
| cg22904048 | 0.322   | 0.584   | -0.263    | 8e-04            | NA                    | Hypomethylated in FP vs FN |
| cg17989833 | 0.305   | 0.587   | -0.282    | 8e-04            | NA                    | Hypomethylated in FP vs FN |
| cg03314963 | 0.326   | 0.613   | -0.287    | 8e-04            | PTN                   | Hypomethylated in FP vs FN |
| cg07106615 | 0.325   | 0.599   | -0.274    | 8e-04            | TP53BP1               | Hypomethylated in FP vs FN |
| cg15736524 | 0.334   | 0.598   | -0.264    | 8e-04            | NA                    | Hypomethylated in FP vs FN |
| cg18919097 | 0.221   | 0.485   | -0.264    | 8e-04            | C3orf57               | Hypomethylated in FP vs FN |
| cg22881652 | 0.205   | 0.508   | -0.304    | 8e-04            | NA                    | Hypomethylated in FP vs FN |
| cg20219381 | 0.244   | 0.592   | -0.348    | 8e-04            | NA                    | Hypomethylated in FP vs FN |
| cg03348792 | 0.281   | 0.550   | -0.269    | 8e-04            | KRT1                  | Hypomethylated in FP vs FN |
| cg00201414 | 0.276   | 0.596   | -0.319    | 8e-04            | THSD1P                | Hypomethylated in FP vs FN |
| cg22949256 | 0.434   | 0.700   | -0.266    | 8e-04            | NA                    | Hypomethylated in FP vs FN |
| cg09272186 | 0.451   | 0.715   | -0.264    | 8e-04            | NA                    | Hypomethylated in FP vs FN |
| cg04515001 | 0.273   | 0.625   | -0.352    | 8e-04            | KAAG1_DCDC2           | Hypomethylated in FP vs FN |
| cg06645921 | 0.384   | 0.664   | -0.280    | 8e-04            | NA                    | Hypomethylated in FP vs FN |
| cg02589791 | 0.163   | 0.462   | -0.300    | 8e-04            | NA                    | Hypomethylated in FP vs FN |
| cg20510474 | 0.391   | 0.650   | -0.260    | 8e-04            | NA                    | Hypomethylated in FP vs FN |
| cg09222982 | 0.261   | 0.537   | -0.276    | 8e-04            | NA                    | Hypomethylated in FP vs FN |
| cg26205771 | 0.159   | 0.438   | -0.279    | 8e-04            | NPBWR1                | Hypomethylated in FP vs FN |
| cg09571762 | 0.197   | 0.452   | -0.255    | 8e-04            | NA                    | Hypomethylated in FP vs FN |
| cg09541256 | 0.206   | 0.520   | -0.314    | 8e-04            | RUNX2                 | Hypomethylated in FP vs FN |
| cg21884509 | 0.221   | 0.483   | -0.262    | 8e-04            | NA                    | Hypomethylated in FP vs FN |
| cg11037477 | 0.201   | 0.512   | -0.311    | 8e-04            | EIF4E                 | Hypomethylated in FP vs FN |

### Supplementary Table 7 (continued)

| Probe      | FP.mean | FN.mean | Mean.diff | Adjusted.P.value | Promoter.related.gene | Category                   |
|------------|---------|---------|-----------|------------------|-----------------------|----------------------------|
| cg07102210 | 0.308   | 0.563   | -0.255    | 8e-04            | NA                    | Hypomethylated in FP vs FN |
| cg04600618 | 0.210   | 0.527   | -0.317    | 8e-04            | RSPH9                 | Hypomethylated in FP vs FN |
| cg04722391 | 0.258   | 0.574   | -0.316    | 8e-04            | NA                    | Hypomethylated in FP vs FN |
| cg00901051 | 0.438   | 0.723   | -0.285    | 8e-04            | NA                    | Hypomethylated in FP vs FN |
| cg10197305 | 0.116   | 0.401   | -0.285    | 8e-04            | NA                    | Hypomethylated in FP vs FN |
| cg10109500 | 0.159   | 0.446   | -0.287    | 8e-04            | GHSR                  | Hypomethylated in FP vs FN |
| cg25162948 | 0.375   | 0.670   | -0.295    | 8e-04            | NA                    | Hypomethylated in FP vs FN |
| cg15731056 | 0.123   | 0.451   | -0.328    | 8e-04            | C12orf56              | Hypomethylated in FP vs FN |
| cg14710465 | 0.246   | 0.507   | -0.260    | 8e-04            | VANGL2                | Hypomethylated in FP vs FN |
| cg16298867 | 0.488   | 0.743   | -0.255    | 8e-04            | NA                    | Hypomethylated in FP vs FN |
| cg01094687 | 0.438   | 0.703   | -0.265    | 8e-04            | NA                    | Hypomethylated in FP vs FN |
| cg14302214 | 0.354   | 0.648   | -0.293    | 8e-04            | NA                    | Hypomethylated in FP vs FN |
| cg23823908 | 0.203   | 0.477   | -0.275    | 8e-04            | PTGER3                | Hypomethylated in FP vs FN |
| cg08024029 | 0.200   | 0.501   | -0.301    | 8e-04            | NA                    | Hypomethylated in FP vs FN |
| cg12118246 | 0.400   | 0.690   | -0.290    | 8e-04            | CD300A                | Hypomethylated in FP vs FN |
| cg16297011 | 0.243   | 0.562   | -0.319    | 8e-04            | NA                    | Hypomethylated in FP vs FN |
| cg13929328 | 0.284   | 0.642   | -0.358    | 8e-04            | FOXI2                 | Hypomethylated in FP vs FN |
| cg26248173 | 0.310   | 0.675   | -0.365    | 8e-04            | NA                    | Hypomethylated in FP vs FN |
| cg17769084 | 0.356   | 0.689   | -0.333    | 8e-04            | NA                    | Hypomethylated in FP vs FN |
| cg06361667 | 0.433   | 0.713   | -0.279    | 8e-04            | NA                    | Hypomethylated in FP vs FN |
| cg24480120 | 0.154   | 0.432   | -0.278    | 8e-04            | NA                    | Hypomethylated in FP vs FN |
| cg07143418 | 0.062   | 0.363   | -0.301    | 8e-04            | NA                    | Hypomethylated in FP vs FN |
| cg03174644 | 0.378   | 0.648   | -0.271    | 8e-04            | NA                    | Hypomethylated in FP vs FN |
| cg05482942 | 0.391   | 0.718   | -0.327    | 8e-04            | NA                    | Hypomethylated in FP vs FN |
| cg16943529 | 0.136   | 0.427   | -0.291    | 8e-04            | NA                    | Hypomethylated in FP vs FN |

### Supplementary Table 7 (continued)

| Probe      | FP.mean | FN.mean | Mean.diff | Adjusted.P.value | Promoter.related.gene | Category                   |
|------------|---------|---------|-----------|------------------|-----------------------|----------------------------|
| cg24990968 | 0.168   | 0.423   | -0.255    | 8e-04            | C12orf56              | Hypomethylated in FP vs FN |
| cg02226645 | 0.311   | 0.574   | -0.263    | 8e-04            | MIR124-2              | Hypomethylated in FP vs FN |
| cg14645841 | 0.405   | 0.679   | -0.274    | 8e-04            | NA                    | Hypomethylated in FP vs FN |
| cg02106866 | 0.484   | 0.749   | -0.265    | 8e-04            | NA                    | Hypomethylated in FP vs FN |
| cg01697865 | 0.339   | 0.592   | -0.253    | 8e-04            | IL10RA                | Hypomethylated in FP vs FN |
| cg06902071 | 0.268   | 0.548   | -0.280    | 8e-04            | NA                    | Hypomethylated in FP vs FN |
| cg19593741 | 0.361   | 0.636   | -0.275    | 8e-04            | NA                    | Hypomethylated in FP vs FN |
| cg07695654 | 0.453   | 0.727   | -0.274    | 8e-04            | NA                    | Hypomethylated in FP vs FN |
| cg23610453 | 0.193   | 0.451   | -0.258    | 8e-04            | NA                    | Hypomethylated in FP vs FN |
| cg23037403 | 0.097   | 0.355   | -0.258    | 8e-04            | ZNF454                | Hypomethylated in FP vs FN |
| cg12655921 | 0.436   | 0.694   | -0.258    | 8e-04            | NA                    | Hypomethylated in FP vs FN |
| cg17781313 | 0.190   | 0.476   | -0.286    | 8e-04            | NA                    | Hypomethylated in FP vs FN |
| cg10989897 | 0.147   | 0.447   | -0.301    | 8e-04            | ELAVL4                | Hypomethylated in FP vs FN |
| cg10228857 | 0.384   | 0.662   | -0.277    | 9e-04            | NA                    | Hypomethylated in FP vs FN |
| cg18659248 | 0.427   | 0.701   | -0.274    | 9e-04            | NA                    | Hypomethylated in FP vs FN |
| cg21970789 | 0.382   | 0.670   | -0.288    | 9e-04            | NA                    | Hypomethylated in FP vs FN |
| cg21045464 | 0.464   | 0.745   | -0.280    | 9e-04            | NA                    | Hypomethylated in FP vs FN |
| cg08500510 | 0.325   | 0.584   | -0.259    | 9e-04            | NA                    | Hypomethylated in FP vs FN |
| cg22685807 | 0.274   | 0.601   | -0.327    | 9e-04            | NA                    | Hypomethylated in FP vs FN |
| cg17678847 | 0.437   | 0.704   | -0.267    | 9e-04            | NA                    | Hypomethylated in FP vs FN |
| cg27294008 | 0.348   | 0.619   | -0.272    | 9e-04            | NA                    | Hypomethylated in FP vs FN |
| cg07150062 | 0.204   | 0.542   | -0.338    | 9e-04            | ASPG                  | Hypomethylated in FP vs FN |
| cg05090759 | 0.251   | 0.588   | -0.337    | 9e-04            | SLC38A11              | Hypomethylated in FP vs FN |
| cg07475000 | 0.273   | 0.529   | -0.256    | 9e-04            | NA                    | Hypomethylated in FP vs FN |
| cg25692524 | 0.242   | 0.506   | -0.264    | 9e-04            | THSD1P                | Hypomethylated in FP vs FN |

### Supplementary Table 7 (continued)

| Probe      | FP.mean | FN.mean | Mean.diff | Adjusted.P.value | Promoter.related.gene | Category                   |
|------------|---------|---------|-----------|------------------|-----------------------|----------------------------|
| cg20312228 | 0.172   | 0.426   | -0.254    | 9e-04            | CCDC37                | Hypomethylated in FP vs FN |
| cg10753836 | 0.326   | 0.610   | -0.283    | 9e-04            | NA                    | Hypomethylated in FP vs FN |
| cg13605988 | 0.166   | 0.421   | -0.256    | 9e-04            | DUOX1                 | Hypomethylated in FP vs FN |
| cg08322234 | 0.274   | 0.564   | -0.290    | 9e-04            | NA                    | Hypomethylated in FP vs FN |
| cg05552035 | 0.318   | 0.579   | -0.261    | 9e-04            | NA                    | Hypomethylated in FP vs FN |
| cg20424335 | 0.398   | 0.653   | -0.256    | 9e-04            | LOC100130776          | Hypomethylated in FP vs FN |
| cg23088184 | 0.181   | 0.496   | -0.315    | 9e-04            | NA                    | Hypomethylated in FP vs FN |
| cg08247587 | 0.306   | 0.595   | -0.288    | 9e-04            | NA                    | Hypomethylated in FP vs FN |
| cg08638184 | 0.288   | 0.553   | -0.264    | 9e-04            | NA                    | Hypomethylated in FP vs FN |
| cg24507144 | 0.214   | 0.509   | -0.295    | 9e-04            | NA                    | Hypomethylated in FP vs FN |
| cg00423153 | 0.383   | 0.675   | -0.293    | 9e-04            | SPHKAP                | Hypomethylated in FP vs FN |
| cg06122518 | 0.353   | 0.619   | -0.266    | 9e-04            | NA                    | Hypomethylated in FP vs FN |
| cg01429039 | 0.343   | 0.696   | -0.353    | 9e-04            | NA                    | Hypomethylated in FP vs FN |
| cg02218200 | 0.272   | 0.555   | -0.283    | 9e-04            | NA                    | Hypomethylated in FP vs FN |
| cg26823666 | 0.264   | 0.528   | -0.264    | 9e-04            | NA                    | Hypomethylated in FP vs FN |
| cg25440035 | 0.161   | 0.489   | -0.329    | 9e-04            | NA                    | Hypomethylated in FP vs FN |
| cg22855900 | 0.185   | 0.529   | -0.344    | 9e-04            | NA                    | Hypomethylated in FP vs FN |
| cg00286984 | 0.217   | 0.501   | -0.284    | 9e-04            | HRASLS5               | Hypomethylated in FP vs FN |
| cg18527583 | 0.253   | 0.531   | -0.278    | 9e-04            | NA                    | Hypomethylated in FP vs FN |
| cg24054871 | 0.382   | 0.643   | -0.260    | 9e-04            | NA                    | Hypomethylated in FP vs FN |
| cg24582934 | 0.164   | 0.481   | -0.317    | 9e-04            | NA                    | Hypomethylated in FP vs FN |
| cg24889708 | 0.410   | 0.706   | -0.296    | 9e-04            | NA                    | Hypomethylated in FP vs FN |
| cg14489474 | 0.236   | 0.506   | -0.270    | 9e-04            | NA                    | Hypomethylated in FP vs FN |
| cg03188390 | 0.366   | 0.623   | -0.257    | 9e-04            | NA                    | Hypomethylated in FP vs FN |
| cg08048222 | 0.115   | 0.401   | -0.286    | 9e-04            | ZNF671                | Hypomethylated in FP vs FN |

### Supplementary Table 7 (continued)

| Probe      | FP.mean | FN.mean | Mean.diff | Adjusted.P.value | Promoter.related.gene | Category                   |
|------------|---------|---------|-----------|------------------|-----------------------|----------------------------|
| cg19024632 | 0.298   | 0.618   | -0.320    | 9e-04            | KCNS3                 | Hypomethylated in FP vs FN |
| cg01613817 | 0.308   | 0.575   | -0.267    | 9e-04            | ERG                   | Hypomethylated in FP vs FN |
| cg13065507 | 0.262   | 0.555   | -0.292    | 9e-04            | NA                    | Hypomethylated in FP vs FN |
| cg23997263 | 0.249   | 0.499   | -0.251    | 9e-04            | FUT9                  | Hypomethylated in FP vs FN |
| cg23248887 | 0.260   | 0.657   | -0.397    | 9e-04            | NA                    | Hypomethylated in FP vs FN |
| cg02864619 | 0.530   | 0.786   | -0.256    | 9e-04            | NA                    | Hypomethylated in FP vs FN |
| cg21398794 | 0.312   | 0.609   | -0.297    | 9e-04            | NA                    | Hypomethylated in FP vs FN |
| cg06313119 | 0.075   | 0.333   | -0.259    | 9e-04            | NA                    | Hypomethylated in FP vs FN |
| cg00961325 | 0.393   | 0.676   | -0.283    | 9e-04            | NA                    | Hypomethylated in FP vs FN |
| cg02458689 | 0.414   | 0.671   | -0.257    | 9e-04            | CGREF1                | Hypomethylated in FP vs FN |
| cg04842553 | 0.289   | 0.541   | -0.252    | 9e-04            | CCDC104               | Hypomethylated in FP vs FN |
| cg25220063 | 0.209   | 0.460   | -0.252    | 9e-04            | NA                    | Hypomethylated in FP vs FN |
| cg18202449 | 0.135   | 0.399   | -0.263    | 9e-04            | ELAVL4                | Hypomethylated in FP vs FN |
| cg05690644 | 0.400   | 0.723   | -0.323    | 9e-04            | NA                    | Hypomethylated in FP vs FN |
| cg27382405 | 0.190   | 0.519   | -0.330    | 9e-04            | NA                    | Hypomethylated in FP vs FN |
| cg21731375 | 0.271   | 0.568   | -0.297    | 9e-04            | NA                    | Hypomethylated in FP vs FN |
| cg16174121 | 0.390   | 0.641   | -0.251    | 9e-04            | AGBL2                 | Hypomethylated in FP vs FN |
| cg02534072 | 0.263   | 0.531   | -0.268    | 9e-04            | NA                    | Hypomethylated in FP vs FN |
| cg15337154 | 0.262   | 0.540   | -0.278    | 9e-04            | NA                    | Hypomethylated in FP vs FN |
| cg14972143 | 0.160   | 0.487   | -0.327    | 9e-04            | EIF4E                 | Hypomethylated in FP vs FN |
| cg14266237 | 0.445   | 0.723   | -0.278    | 9e-04            | NA                    | Hypomethylated in FP vs FN |
| cg19737970 | 0.339   | 0.594   | -0.255    | 9e-04            | LOC100192379          | Hypomethylated in FP vs FN |
| cg14704980 | 0.329   | 0.628   | -0.299    | 9e-04            | NA                    | Hypomethylated in FP vs FN |
| cg24080577 | 0.112   | 0.444   | -0.333    | 9e-04            | HS3ST1                | Hypomethylated in FP vs FN |
| cg12389461 | 0.355   | 0.611   | -0.257    | 9e-04            | RASSF2                | Hypomethylated in FP vs FN |



### Supplementary Table 7 (continued)

| Probe      | FP.mean | FN.mean | Mean.diff | Adjusted.P.value | Promoter.related.gene | Category                   |
|------------|---------|---------|-----------|------------------|-----------------------|----------------------------|
| cg21838554 | 0.490   | 0.752   | -0.263    | 9e-04            | NA                    | Hypomethylated in FP vs FN |
| cg07360304 | 0.391   | 0.643   | -0.252    | 9e-04            | NA                    | Hypomethylated in FP vs FN |
| cg13867865 | 0.093   | 0.401   | -0.309    | 9e-04            | C12orf56              | Hypomethylated in FP vs FN |
| cg26029902 | 0.323   | 0.588   | -0.265    | 1e-03            | RAB22A                | Hypomethylated in FP vs FN |
| cg12047425 | 0.598   | 0.852   | -0.254    | 1e-03            | ALPL                  | Hypomethylated in FP vs FN |
| cg14482308 | 0.244   | 0.597   | -0.353    | 1e-03            | KCNS3                 | Hypomethylated in FP vs FN |
| cg16076328 | 0.355   | 0.675   | -0.320    | 1e-03            | NA                    | Hypomethylated in FP vs FN |
| cg02681163 | 0.420   | 0.686   | -0.266    | 1e-03            | NA                    | Hypomethylated in FP vs FN |
| cg12922492 | 0.394   | 0.649   | -0.255    | 1e-03            | NA                    | Hypomethylated in FP vs FN |
| cg05982460 | 0.254   | 0.557   | -0.303    | 1e-03            | NA                    | Hypomethylated in FP vs FN |
| cg04967578 | 0.527   | 0.785   | -0.258    | 1e-03            | NA                    | Hypomethylated in FP vs FN |
| cg00146805 | 0.421   | 0.686   | -0.265    | 1e-03            | NA                    | Hypomethylated in FP vs FN |
| cg02281167 | 0.220   | 0.479   | -0.259    | 1e-03            | NA                    | Hypomethylated in FP vs FN |
| cg06317507 | 0.416   | 0.693   | -0.277    | 1e-03            | NA                    | Hypomethylated in FP vs FN |
| cg11203512 | 0.346   | 0.660   | -0.314    | 1e-03            | NA                    | Hypomethylated in FP vs FN |
| cg10256242 | 0.445   | 0.753   | -0.308    | 1e-03            | NA                    | Hypomethylated in FP vs FN |
| cg14181576 | 0.348   | 0.673   | -0.326    | 1e-03            | NA                    | Hypomethylated in FP vs FN |
| cg21651328 | 0.258   | 0.579   | -0.321    | 1e-03            | NA                    | Hypomethylated in FP vs FN |
| cg07137955 | 0.119   | 0.436   | -0.317    | 1e-03            | NA                    | Hypomethylated in FP vs FN |
| cg23757446 | 0.170   | 0.469   | -0.299    | 1e-03            | ONECUT2               | Hypomethylated in FP vs FN |
| cg21611810 | 0.304   | 0.615   | -0.311    | 1e-03            | TBX5                  | Hypomethylated in FP vs FN |
| cg17628717 | 0.405   | 0.660   | -0.255    | 1e-03            | NA                    | Hypomethylated in FP vs FN |
| cg22517735 | 0.067   | 0.342   | -0.274    | 1e-03            | HAND2                 | Hypomethylated in FP vs FN |
| cg16960593 | 0.332   | 0.599   | -0.266    | 1e-03            | LPA                   | Hypomethylated in FP vs FN |
| cg08708599 | 0.140   | 0.465   | -0.325    | 1e-03            | NA                    | Hypomethylated in FP vs FN |

### Supplementary Table 7 (continued)

| Probe      | FP.mean | FN.mean | Mean.diff | Adjusted.P.value | Promoter.related.gene | Category                   |
|------------|---------|---------|-----------|------------------|-----------------------|----------------------------|
| cg18693673 | 0.322   | 0.622   | -0.300    | 0.001            | ZSCAN18               | Hypomethylated in FP vs FN |
| cg04682135 | 0.339   | 0.609   | -0.270    | 0.001            | C3orf55               | Hypomethylated in FP vs FN |
| cg13021619 | 0.184   | 0.534   | -0.349    | 0.001            | NKX2-6                | Hypomethylated in FP vs FN |
| cg15279364 | 0.467   | 0.726   | -0.259    | 0.001            | NA                    | Hypomethylated in FP vs FN |
| cg06346388 | 0.321   | 0.605   | -0.284    | 0.001            | NA                    | Hypomethylated in FP vs FN |
| cg21972430 | 0.130   | 0.387   | -0.257    | 0.001            | TPD52L1               | Hypomethylated in FP vs FN |
| cg10477621 | 0.405   | 0.684   | -0.278    | 0.001            | FERD3L                | Hypomethylated in FP vs FN |
| cg15908152 | 0.277   | 0.589   | -0.311    | 0.001            | NA                    | Hypomethylated in FP vs FN |
| cg13005202 | 0.267   | 0.559   | -0.291    | 0.001            | NA                    | Hypomethylated in FP vs FN |
| cg23847109 | 0.078   | 0.447   | -0.369    | 0.001            | COL9A2                | Hypomethylated in FP vs FN |
| cg15523958 | 0.152   | 0.430   | -0.277    | 0.001            | NA                    | Hypomethylated in FP vs FN |
| cg19597170 | 0.290   | 0.543   | -0.253    | 0.001            | NA                    | Hypomethylated in FP vs FN |
| cg16976370 | 0.126   | 0.434   | -0.308    | 0.001            | GABRA4                | Hypomethylated in FP vs FN |
| cg22978620 | 0.134   | 0.414   | -0.279    | 0.001            | NA                    | Hypomethylated in FP vs FN |
| cg06610376 | 0.262   | 0.544   | -0.282    | 0.001            | NA                    | Hypomethylated in FP vs FN |
| cg05661042 | 0.451   | 0.730   | -0.279    | 0.001            | NA                    | Hypomethylated in FP vs FN |
| cg21711545 | 0.401   | 0.658   | -0.257    | 0.001            | NA                    | Hypomethylated in FP vs FN |
| cg11201710 | 0.173   | 0.456   | -0.283    | 0.001            | NA                    | Hypomethylated in FP vs FN |
| cg26710722 | 0.123   | 0.407   | -0.284    | 0.001            | COL9A2                | Hypomethylated in FP vs FN |
| cg03803541 | 0.186   | 0.516   | -0.330    | 0.001            | NA                    | Hypomethylated in FP vs FN |
| cg19683417 | 0.421   | 0.677   | -0.255    | 0.001            | NA                    | Hypomethylated in FP vs FN |
| cg01321673 | 0.397   | 0.649   | -0.252    | 0.001            | NA                    | Hypomethylated in FP vs FN |
| cg08112929 | 0.395   | 0.650   | -0.255    | 0.001            | NA                    | Hypomethylated in FP vs FN |
| cg16269733 | 0.249   | 0.573   | -0.324    | 0.001            | NA                    | Hypomethylated in FP vs FN |
| cg13421062 | 0.193   | 0.464   | -0.271    | 0.001            | NA                    | Hypomethylated in FP vs FN |

### Supplementary Table 7 (continued)

| Probe      | FP.mean | FN.mean | Mean.diff | Adjusted.P.value | Promoter.related.gene | Category                   |
|------------|---------|---------|-----------|------------------|-----------------------|----------------------------|
| cg02386159 | 0.133   | 0.385   | -0.252    | 0.001            | NA                    | Hypomethylated in FP vs FN |
| cg08270005 | 0.335   | 0.597   | -0.262    | 0.001            | NA                    | Hypomethylated in FP vs FN |
| cg00064296 | 0.429   | 0.691   | -0.262    | 0.001            | NA                    | Hypomethylated in FP vs FN |
| cg15898116 | 0.412   | 0.667   | -0.256    | 0.001            | NA                    | Hypomethylated in FP vs FN |
| cg25392692 | 0.315   | 0.636   | -0.321    | 0.001            | NA                    | Hypomethylated in FP vs FN |
| cg05184519 | 0.314   | 0.604   | -0.290    | 0.001            | NA                    | Hypomethylated in FP vs FN |
| cg20040488 | 0.325   | 0.597   | -0.272    | 0.001            | NA                    | Hypomethylated in FP vs FN |
| cg09208611 | 0.141   | 0.394   | -0.253    | 0.001            | AVPR1A                | Hypomethylated in FP vs FN |
| cg23009355 | 0.537   | 0.830   | -0.293    | 0.001            | GAL                   | Hypomethylated in FP vs FN |
| cg04451736 | 0.439   | 0.720   | -0.281    | 0.001            | NA                    | Hypomethylated in FP vs FN |
| cg12584100 | 0.144   | 0.459   | -0.315    | 0.001            | NA                    | Hypomethylated in FP vs FN |
| cg02939659 | 0.465   | 0.770   | -0.305    | 0.001            | NA                    | Hypomethylated in FP vs FN |
| cg27361370 | 0.408   | 0.712   | -0.304    | 0.001            | NA                    | Hypomethylated in FP vs FN |
| cg08332658 | 0.130   | 0.447   | -0.317    | 0.001            | NA                    | Hypomethylated in FP vs FN |
| cg15584788 | 0.268   | 0.555   | -0.287    | 0.001            | RNF207                | Hypomethylated in FP vs FN |
| cg09982773 | 0.375   | 0.672   | -0.297    | 0.001            | KCP                   | Hypomethylated in FP vs FN |
| cg10838664 | 0.051   | 0.351   | -0.300    | 0.001            | NA                    | Hypomethylated in FP vs FN |
| cg01786715 | 0.179   | 0.457   | -0.278    | 0.001            | HSPA2                 | Hypomethylated in FP vs FN |
| cg12630714 | 0.180   | 0.453   | -0.273    | 0.001            | NA                    | Hypomethylated in FP vs FN |
| cg06858835 | 0.421   | 0.713   | -0.292    | 0.001            | NA                    | Hypomethylated in FP vs FN |
| cg03381604 | 0.284   | 0.538   | -0.254    | 0.001            | NA                    | Hypomethylated in FP vs FN |
| cg09253581 | 0.176   | 0.463   | -0.288    | 0.001            | NA                    | Hypomethylated in FP vs FN |
| cg16953473 | 0.326   | 0.641   | -0.315    | 0.001            | NA                    | Hypomethylated in FP vs FN |
| cg19749660 | 0.307   | 0.598   | -0.291    | 0.001            | NA                    | Hypomethylated in FP vs FN |
| cg03840073 | 0.267   | 0.540   | -0.273    | 0.001            | NA                    | Hypomethylated in FP vs FN |

### Supplementary Table 7 (continued)

| Probe      | FP.mean | FN.mean | Mean.diff | Adjusted.P.value | Promoter.related.gene | Category                   |
|------------|---------|---------|-----------|------------------|-----------------------|----------------------------|
| cg08693172 | 0.357   | 0.624   | -0.267    | 0.001            | PGLYRP1               | Hypomethylated in FP vs FN |
| cg19828220 | 0.214   | 0.502   | -0.287    | 0.001            | HOXB6                 | Hypomethylated in FP vs FN |
| cg03716852 | 0.302   | 0.565   | -0.264    | 0.001            | NA                    | Hypomethylated in FP vs FN |
| cg03930899 | 0.263   | 0.544   | -0.281    | 0.001            | RFWD3                 | Hypomethylated in FP vs FN |
| cg02411895 | 0.367   | 0.630   | -0.263    | 0.001            | NA                    | Hypomethylated in FP vs FN |
| cg06385118 | 0.098   | 0.370   | -0.272    | 0.001            | LOC441046             | Hypomethylated in FP vs FN |
| cg00258597 | 0.117   | 0.383   | -0.267    | 0.001            | NA                    | Hypomethylated in FP vs FN |
| cg22296593 | 0.496   | 0.749   | -0.253    | 0.001            | HOXB1                 | Hypomethylated in FP vs FN |
| cg06400704 | 0.275   | 0.576   | -0.301    | 0.001            | FMN2                  | Hypomethylated in FP vs FN |
| cg13635455 | 0.085   | 0.371   | -0.286    | 0.001            | NA                    | Hypomethylated in FP vs FN |
| cg01477253 | 0.439   | 0.715   | -0.276    | 0.001            | NA                    | Hypomethylated in FP vs FN |
| cg03807235 | 0.325   | 0.606   | -0.281    | 0.001            | NA                    | Hypomethylated in FP vs FN |
| cg08173692 | 0.102   | 0.384   | -0.282    | 0.001            | PRR18                 | Hypomethylated in FP vs FN |
| cg16581308 | 0.420   | 0.694   | -0.274    | 0.001            | NA                    | Hypomethylated in FP vs FN |
| cg15734454 | 0.421   | 0.675   | -0.254    | 0.001            | NA                    | Hypomethylated in FP vs FN |
| cg04897683 | 0.184   | 0.454   | -0.270    | 0.001            | NEUROG1               | Hypomethylated in FP vs FN |
| cg05873889 | 0.103   | 0.415   | -0.312    | 0.001            | SERP2                 | Hypomethylated in FP vs FN |
| cg13968233 | 0.495   | 0.747   | -0.252    | 0.001            | NA                    | Hypomethylated in FP vs FN |
| cg24871798 | 0.188   | 0.466   | -0.279    | 0.001            | NA                    | Hypomethylated in FP vs FN |
| cg15199678 | 0.191   | 0.442   | -0.251    | 0.001            | NA                    | Hypomethylated in FP vs FN |
| cg22346476 | 0.291   | 0.600   | -0.309    | 0.001            | NA                    | Hypomethylated in FP vs FN |
| cg23933241 | 0.339   | 0.615   | -0.276    | 0.001            | NA                    | Hypomethylated in FP vs FN |
| cg20988565 | 0.383   | 0.637   | -0.254    | 0.001            | NA                    | Hypomethylated in FP vs FN |
| cg00355281 | 0.124   | 0.403   | -0.279    | 0.001            | NPY                   | Hypomethylated in FP vs FN |
| cg06592065 | 0.429   | 0.711   | -0.282    | 0.001            | NA                    | Hypomethylated in FP vs FN |

### Supplementary Table 7 (continued)

| Probe      | FP.mean | FN.mean | Mean.diff | Adjusted.P.value | Promoter.related.gene | Category                   |
|------------|---------|---------|-----------|------------------|-----------------------|----------------------------|
| cg24466241 | 0.067   | 0.330   | -0.263    | 0.001            | NA                    | Hypomethylated in FP vs FN |
| cg22642777 | 0.209   | 0.477   | -0.268    | 0.001            | NA                    | Hypomethylated in FP vs FN |
| cg25669593 | 0.447   | 0.699   | -0.252    | 0.001            | NA                    | Hypomethylated in FP vs FN |
| cg05239940 | 0.408   | 0.673   | -0.265    | 0.001            | NA                    | Hypomethylated in FP vs FN |
| cg22646995 | 0.291   | 0.547   | -0.256    | 0.001            | NA                    | Hypomethylated in FP vs FN |
| cg03464655 | 0.193   | 0.488   | -0.295    | 0.001            | SLC38A11              | Hypomethylated in FP vs FN |
| cg13443627 | 0.370   | 0.699   | -0.329    | 0.001            | TACSTD2               | Hypomethylated in FP vs FN |
| cg06953252 | 0.061   | 0.335   | -0.274    | 0.001            | COL9A2                | Hypomethylated in FP vs FN |
| cg16300637 | 0.087   | 0.366   | -0.279    | 0.001            | NA                    | Hypomethylated in FP vs FN |
| cg06382559 | 0.360   | 0.636   | -0.276    | 0.001            | NA                    | Hypomethylated in FP vs FN |
| cg01501551 | 0.180   | 0.477   | -0.297    | 0.001            | NA                    | Hypomethylated in FP vs FN |
| cg03362215 | 0.327   | 0.605   | -0.278    | 0.001            | NA                    | Hypomethylated in FP vs FN |
| cg02020945 | 0.124   | 0.388   | -0.264    | 0.001            | NA                    | Hypomethylated in FP vs FN |
| cg26915952 | 0.482   | 0.737   | -0.255    | 0.001            | NA                    | Hypomethylated in FP vs FN |
| cg25185173 | 0.239   | 0.580   | -0.341    | 0.001            | NA                    | Hypomethylated in FP vs FN |
| cg19373813 | 0.447   | 0.712   | -0.265    | 0.001            | NA                    | Hypomethylated in FP vs FN |
| cg22345692 | 0.116   | 0.381   | -0.265    | 0.001            | NA                    | Hypomethylated in FP vs FN |
| cg06505349 | 0.421   | 0.717   | -0.296    | 0.001            | NA                    | Hypomethylated in FP vs FN |
| cg13794588 | 0.382   | 0.638   | -0.256    | 0.001            | FCN2                  | Hypomethylated in FP vs FN |
| cg10761315 | 0.214   | 0.492   | -0.278    | 0.001            | ASPG                  | Hypomethylated in FP vs FN |
| cg02294649 | 0.145   | 0.422   | -0.277    | 0.001            | NA                    | Hypomethylated in FP vs FN |
| cg02962406 | 0.493   | 0.780   | -0.287    | 0.001            | NA                    | Hypomethylated in FP vs FN |
| cg14388488 | 0.196   | 0.514   | -0.318    | 0.001            | GATA5                 | Hypomethylated in FP vs FN |
| cg06156093 | 0.213   | 0.512   | -0.299    | 0.001            | NA                    | Hypomethylated in FP vs FN |
| cg01092293 | 0.332   | 0.654   | -0.322    | 0.001            | LY75                  | Hypomethylated in FP vs FN |

### Supplementary Table 7 (continued)

| Probe      | FP.mean | FN.mean | Mean.diff | Adjusted.P.value | Promoter.related.gene | Category                   |
|------------|---------|---------|-----------|------------------|-----------------------|----------------------------|
| cg13000496 | 0.284   | 0.548   | -0.264    | 0.001            | NA                    | Hypomethylated in FP vs FN |
| cg24405999 | 0.174   | 0.431   | -0.256    | 0.001            | NA                    | Hypomethylated in FP vs FN |
| cg22791987 | 0.463   | 0.738   | -0.275    | 0.001            | NA                    | Hypomethylated in FP vs FN |
| cg20671415 | 0.392   | 0.647   | -0.255    | 0.001            | NA                    | Hypomethylated in FP vs FN |
| cg07811198 | 0.254   | 0.563   | -0.308    | 0.001            | NA                    | Hypomethylated in FP vs FN |
| cg17179862 | 0.205   | 0.549   | -0.344    | 0.001            | NA                    | Hypomethylated in FP vs FN |
| cg02701278 | 0.330   | 0.673   | -0.343    | 0.001            | NA                    | Hypomethylated in FP vs FN |
| cg14716968 | 0.315   | 0.569   | -0.254    | 0.001            | DLG2                  | Hypomethylated in FP vs FN |
| cg14338887 | 0.101   | 0.378   | -0.277    | 0.001            | GNMT                  | Hypomethylated in FP vs FN |
| cg07138115 | 0.238   | 0.501   | -0.263    | 0.001            | NA                    | Hypomethylated in FP vs FN |
| cg00812299 | 0.170   | 0.467   | -0.297    | 0.001            | NA                    | Hypomethylated in FP vs FN |
| cg20457732 | 0.214   | 0.517   | -0.303    | 0.001            | NA                    | Hypomethylated in FP vs FN |
| cg03940966 | 0.095   | 0.349   | -0.254    | 0.001            | NA                    | Hypomethylated in FP vs FN |
| cg02794696 | 0.361   | 0.632   | -0.271    | 0.001            | NA                    | Hypomethylated in FP vs FN |
| cg03726739 | 0.353   | 0.618   | -0.265    | 0.001            | NA                    | Hypomethylated in FP vs FN |
| cg16704703 | 0.292   | 0.544   | -0.251    | 0.001            | NA                    | Hypomethylated in FP vs FN |
| cg03969260 | 0.312   | 0.591   | -0.280    | 0.001            | NA                    | Hypomethylated in FP vs FN |
| cg20813798 | 0.350   | 0.620   | -0.270    | 0.001            | NA                    | Hypomethylated in FP vs FN |
| cg01923272 | 0.475   | 0.732   | -0.256    | 0.001            | NA                    | Hypomethylated in FP vs FN |
| cg26620710 | 0.183   | 0.455   | -0.271    | 0.001            | NA                    | Hypomethylated in FP vs FN |
| cg15889913 | 0.295   | 0.606   | -0.311    | 0.001            | NA                    | Hypomethylated in FP vs FN |
| cg15712323 | 0.509   | 0.766   | -0.257    | 0.001            | NA                    | Hypomethylated in FP vs FN |
| cg08148553 | 0.241   | 0.566   | -0.325    | 0.001            | AP1M2                 | Hypomethylated in FP vs FN |
| cg27227250 | 0.390   | 0.660   | -0.270    | 0.001            | NA                    | Hypomethylated in FP vs FN |
| cg23939096 | 0.379   | 0.673   | -0.294    | 0.001            | NA                    | Hypomethylated in FP vs FN |

### Supplementary Table 7 (continued)

| Probe      | FP.mean | FN.mean | Mean.diff | Adjusted.P.value | Promoter.related.gene | Category                   |
|------------|---------|---------|-----------|------------------|-----------------------|----------------------------|
| cg04545556 | 0.492   | 0.767   | -0.275    | 0.001            | NA                    | Hypomethylated in FP vs FN |
| cg01688688 | 0.423   | 0.676   | -0.253    | 0.001            | NA                    | Hypomethylated in FP vs FN |
| cg15347342 | 0.142   | 0.412   | -0.270    | 0.001            | NA                    | Hypomethylated in FP vs FN |
| cg18753440 | 0.234   | 0.486   | -0.252    | 0.001            | NA                    | Hypomethylated in FP vs FN |
| cg10143067 | 0.294   | 0.599   | -0.305    | 0.001            | NA                    | Hypomethylated in FP vs FN |
| cg01815671 | 0.141   | 0.451   | -0.310    | 0.001            | CCDC37                | Hypomethylated in FP vs FN |
| cg21167817 | 0.447   | 0.707   | -0.260    | 0.001            | NA                    | Hypomethylated in FP vs FN |
| cg21437028 | 0.443   | 0.709   | -0.267    | 0.001            | NA                    | Hypomethylated in FP vs FN |
| cg23429966 | 0.444   | 0.725   | -0.282    | 0.001            | NA                    | Hypomethylated in FP vs FN |
| cg24709471 | 0.162   | 0.431   | -0.269    | 0.001            | NA                    | Hypomethylated in FP vs FN |
| cg06837981 | 0.426   | 0.705   | -0.279    | 0.001            | NA                    | Hypomethylated in FP vs FN |
| cg17352540 | 0.191   | 0.453   | -0.262    | 0.001            | GSX1                  | Hypomethylated in FP vs FN |
| cg21303011 | 0.297   | 0.616   | -0.319    | 0.001            | THRB                  | Hypomethylated in FP vs FN |
| cg19555641 | 0.375   | 0.636   | -0.261    | 0.001            | NA                    | Hypomethylated in FP vs FN |
| cg09095892 | 0.460   | 0.740   | -0.280    | 0.001            | NA                    | Hypomethylated in FP vs FN |
| cg24613083 | 0.418   | 0.696   | -0.278    | 0.001            | NA                    | Hypomethylated in FP vs FN |
| cg24682036 | 0.403   | 0.669   | -0.266    | 0.001            | DSG2                  | Hypomethylated in FP vs FN |
| cg27177554 | 0.241   | 0.531   | -0.290    | 0.001            | NA                    | Hypomethylated in FP vs FN |
| cg16922937 | 0.487   | 0.740   | -0.252    | 0.001            | NA                    | Hypomethylated in FP vs FN |
| cg18502142 | 0.278   | 0.575   | -0.297    | 0.001            | NA                    | Hypomethylated in FP vs FN |
| cg24790297 | 0.418   | 0.685   | -0.267    | 0.001            | CLEC11A               | Hypomethylated in FP vs FN |
| cg25027788 | 0.297   | 0.585   | -0.288    | 0.001            | NA                    | Hypomethylated in FP vs FN |
| cg25823085 | 0.243   | 0.526   | -0.283    | 0.001            | ABCB4                 | Hypomethylated in FP vs FN |
| cg11406274 | 0.395   | 0.666   | -0.271    | 0.001            | NA                    | Hypomethylated in FP vs FN |
| cg15356461 | 0.617   | 0.868   | -0.252    | 0.001            | NA                    | Hypomethylated in FP vs FN |

### Supplementary Table 7 (continued)

| Probe      | FP.mean | FN.mean | Mean.diff | Adjusted.P.value | Promoter.related.gene | Category                   |
|------------|---------|---------|-----------|------------------|-----------------------|----------------------------|
| cg21920871 | 0.326   | 0.584   | -0.258    | 0.001            | NA                    | Hypomethylated in FP vs FN |
| cg14367229 | 0.255   | 0.555   | -0.301    | 0.001            | NA                    | Hypomethylated in FP vs FN |
| cg24741158 | 0.457   | 0.729   | -0.272    | 0.001            | NA                    | Hypomethylated in FP vs FN |
| cg00714725 | 0.128   | 0.407   | -0.279    | 0.001            | NA                    | Hypomethylated in FP vs FN |
| cg26497348 | 0.248   | 0.506   | -0.258    | 0.001            | DSC3                  | Hypomethylated in FP vs FN |
| cg11267802 | 0.239   | 0.512   | -0.274    | 0.001            | SPRR2G                | Hypomethylated in FP vs FN |
| cg12974599 | 0.413   | 0.703   | -0.290    | 0.001            | NA                    | Hypomethylated in FP vs FN |
| cg17431952 | 0.450   | 0.721   | -0.272    | 0.001            | NA                    | Hypomethylated in FP vs FN |
| cg25260137 | 0.170   | 0.488   | -0.318    | 0.001            | NA                    | Hypomethylated in FP vs FN |
| cg09671955 | 0.340   | 0.609   | -0.269    | 0.001            | NA                    | Hypomethylated in FP vs FN |
| cg05346286 | 0.278   | 0.533   | -0.255    | 0.001            | NA                    | Hypomethylated in FP vs FN |
| cg09053907 | 0.213   | 0.475   | -0.262    | 0.001            | BTC                   | Hypomethylated in FP vs FN |
| cg02251315 | 0.524   | 0.777   | -0.253    | 0.001            | NA                    | Hypomethylated in FP vs FN |
| cg01860201 | 0.197   | 0.455   | -0.258    | 0.001            | BTC                   | Hypomethylated in FP vs FN |
| cg11236429 | 0.227   | 0.553   | -0.326    | 0.001            | NA                    | Hypomethylated in FP vs FN |
| cg17538572 | 0.148   | 0.518   | -0.370    | 0.001            | NA                    | Hypomethylated in FP vs FN |
| cg09553232 | 0.441   | 0.691   | -0.250    | 0.001            | NA                    | Hypomethylated in FP vs FN |
| cg19727767 | 0.570   | 0.822   | -0.252    | 0.001            | NA                    | Hypomethylated in FP vs FN |
| cg20026939 | 0.304   | 0.577   | -0.274    | 0.001            | NA                    | Hypomethylated in FP vs FN |
| cg23317614 | 0.547   | 0.805   | -0.259    | 0.001            | NA                    | Hypomethylated in FP vs FN |
| cg14847483 | 0.362   | 0.615   | -0.253    | 0.001            | TMEM85                | Hypomethylated in FP vs FN |
| cg20897830 | 0.378   | 0.678   | -0.299    | 0.001            | NA                    | Hypomethylated in FP vs FN |
| cg27076669 | 0.146   | 0.402   | -0.256    | 0.001            | CPM                   | Hypomethylated in FP vs FN |
| cg02577773 | 0.334   | 0.605   | -0.271    | 0.001            | NA                    | Hypomethylated in FP vs FN |
| cg19724910 | 0.355   | 0.605   | -0.251    | 0.001            | GPR17                 | Hypomethylated in FP vs FN |



### Supplementary Table 7 (continued)

| Probe      | FP.mean | FN.mean | Mean.diff | Adjusted.P.value | Promoter.related.gene | Category                   |
|------------|---------|---------|-----------|------------------|-----------------------|----------------------------|
| cg01755505 | 0.336   | 0.589   | -0.252    | 0.001            | NA                    | Hypomethylated in FP vs FN |
| cg24531520 | 0.333   | 0.622   | -0.289    | 0.001            | RHEB                  | Hypomethylated in FP vs FN |
| cg04492459 | 0.449   | 0.717   | -0.269    | 0.001            | NA                    | Hypomethylated in FP vs FN |
| cg25046651 | 0.302   | 0.593   | -0.291    | 0.001            | NA                    | Hypomethylated in FP vs FN |
| cg16540590 | 0.268   | 0.526   | -0.258    | 0.001            | NA                    | Hypomethylated in FP vs FN |
| cg25667841 | 0.110   | 0.399   | -0.289    | 0.001            | GATA5                 | Hypomethylated in FP vs FN |
| cg17940113 | 0.437   | 0.689   | -0.252    | 0.001            | NA                    | Hypomethylated in FP vs FN |
| cg12597389 | 0.165   | 0.500   | -0.334    | 0.001            | NA                    | Hypomethylated in FP vs FN |
| cg04824711 | 0.318   | 0.603   | -0.285    | 0.001            | PTEN_KILLIN           | Hypomethylated in FP vs FN |
| cg11320150 | 0.470   | 0.745   | -0.275    | 0.001            | NA                    | Hypomethylated in FP vs FN |
| cg06816106 | 0.094   | 0.363   | -0.269    | 0.001            | SPDYA                 | Hypomethylated in FP vs FN |
| cg24205914 | 0.380   | 0.633   | -0.254    | 0.001            | RHOBTB1               | Hypomethylated in FP vs FN |
| cg09632907 | 0.173   | 0.443   | -0.269    | 0.001            | NA                    | Hypomethylated in FP vs FN |
| cg21543859 | 0.188   | 0.461   | -0.273    | 0.001            | NA                    | Hypomethylated in FP vs FN |
| cg23816347 | 0.154   | 0.438   | -0.284    | 0.001            | CCDC37                | Hypomethylated in FP vs FN |
| cg00708598 | 0.406   | 0.681   | -0.275    | 0.001            | LECT1                 | Hypomethylated in FP vs FN |
| cg10580341 | 0.415   | 0.681   | -0.266    | 0.001            | NA                    | Hypomethylated in FP vs FN |
| cg05021643 | 0.309   | 0.604   | -0.294    | 0.001            | NA                    | Hypomethylated in FP vs FN |
| cg26222247 | 0.353   | 0.643   | -0.290    | 0.001            | NA                    | Hypomethylated in FP vs FN |
| cg21336594 | 0.431   | 0.683   | -0.251    | 0.001            | NA                    | Hypomethylated in FP vs FN |
| cg18395354 | 0.369   | 0.626   | -0.257    | 0.001            | NA                    | Hypomethylated in FP vs FN |
| cg04276508 | 0.232   | 0.525   | -0.293    | 0.001            | NA                    | Hypomethylated in FP vs FN |
| cg06141004 | 0.336   | 0.592   | -0.256    | 0.001            | C7orf28B              | Hypomethylated in FP vs FN |
| cg08991742 | 0.355   | 0.606   | -0.251    | 0.001            | ARHGAP25              | Hypomethylated in FP vs FN |
| cg19315854 | 0.445   | 0.704   | -0.260    | 0.001            | NA                    | Hypomethylated in FP vs FN |

### Supplementary Table 7 (continued)

| Probe      | FP.mean | FN.mean | Mean.diff | Adjusted.P.value | Promoter.related.gene | Category                   |
|------------|---------|---------|-----------|------------------|-----------------------|----------------------------|
| cg21170658 | 0.438   | 0.693   | -0.255    | 0.001            | NA                    | Hypomethylated in FP vs FN |
| cg17533927 | 0.424   | 0.692   | -0.269    | 0.001            | KCP                   | Hypomethylated in FP vs FN |
| cg26549701 | 0.257   | 0.590   | -0.333    | 0.001            | NA                    | Hypomethylated in FP vs FN |
| cg18217235 | 0.181   | 0.471   | -0.290    | 0.001            | NA                    | Hypomethylated in FP vs FN |
| cg13596049 | 0.229   | 0.486   | -0.257    | 0.001            | FAM59A                | Hypomethylated in FP vs FN |
| cg19188855 | 0.464   | 0.745   | -0.281    | 0.001            | NA                    | Hypomethylated in FP vs FN |
| cg09803262 | 0.330   | 0.612   | -0.282    | 0.001            | NA                    | Hypomethylated in FP vs FN |
| cg18235050 | 0.275   | 0.625   | -0.350    | 0.001            | NA                    | Hypomethylated in FP vs FN |
| cg02015909 | 0.273   | 0.542   | -0.269    | 0.001            | NA                    | Hypomethylated in FP vs FN |
| cg02428119 | 0.099   | 0.369   | -0.269    | 0.001            | NA                    | Hypomethylated in FP vs FN |
| cg08166631 | 0.319   | 0.585   | -0.266    | 0.001            | NA                    | Hypomethylated in FP vs FN |
| cg01869243 | 0.092   | 0.358   | -0.267    | 0.001            | NA                    | Hypomethylated in FP vs FN |
| cg25196975 | 0.309   | 0.563   | -0.254    | 0.001            | NA                    | Hypomethylated in FP vs FN |
| cg08473693 | 0.470   | 0.729   | -0.259    | 0.001            | NA                    | Hypomethylated in FP vs FN |
| cg26953640 | 0.162   | 0.448   | -0.286    | 0.001            | BHLHA9                | Hypomethylated in FP vs FN |
| cg14085012 | 0.461   | 0.728   | -0.267    | 0.001            | NA                    | Hypomethylated in FP vs FN |
| cg02146001 | 0.109   | 0.429   | -0.320    | 0.001            | GATA5                 | Hypomethylated in FP vs FN |
| cg02847897 | 0.337   | 0.594   | -0.257    | 0.001            | KLHL8                 | Hypomethylated in FP vs FN |
| cg07914107 | 0.486   | 0.763   | -0.277    | 0.001            | PDE4B                 | Hypomethylated in FP vs FN |
| cg03056547 | 0.429   | 0.689   | -0.260    | 0.001            | NA                    | Hypomethylated in FP vs FN |
| cg13331196 | 0.279   | 0.640   | -0.361    | 0.001            | NA                    | Hypomethylated in FP vs FN |
| cg18789841 | 0.141   | 0.427   | -0.286    | 0.001            | LOC441046             | Hypomethylated in FP vs FN |
| cg17951408 | 0.426   | 0.692   | -0.266    | 0.001            | NA                    | Hypomethylated in FP vs FN |
| cg14525688 | 0.134   | 0.430   | -0.296    | 0.001            | NA                    | Hypomethylated in FP vs FN |
| cg24014143 | 0.109   | 0.397   | -0.288    | 0.001            | KLHL1                 | Hypomethylated in FP vs FN |

### Supplementary Table 7 (continued)

| Probe      | FP.mean | FN.mean | Mean.diff | Adjusted.P.value | Promoter.related.gene | Category                   |
|------------|---------|---------|-----------|------------------|-----------------------|----------------------------|
| cg00005847 | 0.529   | 0.787   | -0.258    | 0.001            | NA                    | Hypomethylated in FP vs FN |
| cg03858663 | 0.294   | 0.549   | -0.255    | 0.001            | NA                    | Hypomethylated in FP vs FN |
| cg08783317 | 0.359   | 0.650   | -0.291    | 0.001            | NA                    | Hypomethylated in FP vs FN |
| cg00531628 | 0.156   | 0.452   | -0.296    | 0.001            | IFIH1                 | Hypomethylated in FP vs FN |
| cg22763680 | 0.309   | 0.568   | -0.259    | 0.001            | NA                    | Hypomethylated in FP vs FN |
| cg19925849 | 0.160   | 0.423   | -0.263    | 0.001            | NA                    | Hypomethylated in FP vs FN |
| cg22601300 | 0.359   | 0.614   | -0.255    | 0.001            | NA                    | Hypomethylated in FP vs FN |
| cg05471602 | 0.525   | 0.796   | -0.271    | 0.001            | NA                    | Hypomethylated in FP vs FN |
| cg21922574 | 0.095   | 0.383   | -0.289    | 0.001            | NETO1                 | Hypomethylated in FP vs FN |
| cg24422029 | 0.446   | 0.733   | -0.287    | 0.001            | CACNB2                | Hypomethylated in FP vs FN |
| cg18759693 | 0.066   | 0.364   | -0.298    | 0.001            | NA                    | Hypomethylated in FP vs FN |
| cg15666789 | 0.345   | 0.628   | -0.283    | 0.001            | TTR                   | Hypomethylated in FP vs FN |
| cg25336332 | 0.508   | 0.772   | -0.264    | 0.001            | THRB                  | Hypomethylated in FP vs FN |
| cg01774894 | 0.360   | 0.619   | -0.259    | 0.001            | NA                    | Hypomethylated in FP vs FN |
| cg15943038 | 0.328   | 0.579   | -0.251    | 0.001            | NA                    | Hypomethylated in FP vs FN |
| cg14229668 | 0.155   | 0.463   | -0.308    | 0.001            | GCA                   | Hypomethylated in FP vs FN |
| cg02411088 | 0.289   | 0.551   | -0.262    | 0.001            | NA                    | Hypomethylated in FP vs FN |
| cg24322968 | 0.316   | 0.580   | -0.264    | 0.001            | SKAP1                 | Hypomethylated in FP vs FN |
| cg15812753 | 0.298   | 0.570   | -0.272    | 0.001            | NA                    | Hypomethylated in FP vs FN |
| cg19690766 | 0.200   | 0.536   | -0.337    | 0.001            | NA                    | Hypomethylated in FP vs FN |
| cg12414557 | 0.247   | 0.537   | -0.290    | 0.001            | RNF212                | Hypomethylated in FP vs FN |
| cg26727693 | 0.197   | 0.475   | -0.279    | 0.001            | AVPR1A                | Hypomethylated in FP vs FN |
| cg15985184 | 0.107   | 0.375   | -0.267    | 0.001            | NA                    | Hypomethylated in FP vs FN |
| cg04104463 | 0.302   | 0.571   | -0.269    | 0.001            | MIR124-2              | Hypomethylated in FP vs FN |
| cg05710540 | 0.134   | 0.454   | -0.321    | 0.001            | NA                    | Hypomethylated in FP vs FN |

### Supplementary Table 7 (continued)

| Probe      | FP.mean | FN.mean | Mean.diff | Adjusted.P.value | Promoter.related.gene | Category                   |
|------------|---------|---------|-----------|------------------|-----------------------|----------------------------|
| cg19474888 | 0.341   | 0.631   | -0.290    | 0.001            | NA                    | Hypomethylated in FP vs FN |
| cg27393010 | 0.130   | 0.449   | -0.318    | 0.001            | NA                    | Hypomethylated in FP vs FN |
| cg07709903 | 0.377   | 0.643   | -0.266    | 0.001            | NA                    | Hypomethylated in FP vs FN |
| cg04625914 | 0.427   | 0.677   | -0.250    | 0.001            | NA                    | Hypomethylated in FP vs FN |
| cg16419441 | 0.161   | 0.465   | -0.304    | 0.001            | NA                    | Hypomethylated in FP vs FN |
| cg02395846 | 0.474   | 0.768   | -0.294    | 0.001            | NA                    | Hypomethylated in FP vs FN |
| cg24885417 | 0.055   | 0.309   | -0.254    | 0.001            | NPY                   | Hypomethylated in FP vs FN |
| cg04217927 | 0.183   | 0.500   | -0.316    | 0.001            | AGBL2                 | Hypomethylated in FP vs FN |
| cg23358625 | 0.252   | 0.600   | -0.348    | 0.001            | RPSAP58               | Hypomethylated in FP vs FN |
| cg26949694 | 0.202   | 0.457   | -0.255    | 0.001            | BDNF                  | Hypomethylated in FP vs FN |
| cg20221591 | 0.416   | 0.693   | -0.277    | 0.001            | MYEOV2                | Hypomethylated in FP vs FN |
| cg18873386 | 0.449   | 0.700   | -0.251    | 0.001            | NA                    | Hypomethylated in FP vs FN |
| cg07428323 | 0.093   | 0.364   | -0.271    | 0.001            | NA                    | Hypomethylated in FP vs FN |
| cg04996195 | 0.166   | 0.442   | -0.277    | 0.001            | ABCB4                 | Hypomethylated in FP vs FN |
| cg20291855 | 0.176   | 0.518   | -0.342    | 0.001            | NA                    | Hypomethylated in FP vs FN |
| cg17071446 | 0.330   | 0.602   | -0.272    | 0.001            | NA                    | Hypomethylated in FP vs FN |
| cg09730689 | 0.377   | 0.659   | -0.282    | 0.001            | NA                    | Hypomethylated in FP vs FN |
| cg15368905 | 0.249   | 0.542   | -0.293    | 0.001            | HTR1B                 | Hypomethylated in FP vs FN |
| cg03056526 | 0.320   | 0.594   | -0.274    | 0.001            | NA                    | Hypomethylated in FP vs FN |
| cg16727923 | 0.257   | 0.598   | -0.341    | 0.001            | SLITRK1               | Hypomethylated in FP vs FN |
| cg11934394 | 0.364   | 0.629   | -0.265    | 0.001            | NA                    | Hypomethylated in FP vs FN |
| cg01861825 | 0.435   | 0.720   | -0.285    | 0.001            | NA                    | Hypomethylated in FP vs FN |
| cg03314029 | 0.128   | 0.420   | -0.292    | 0.001            | ZNF469                | Hypomethylated in FP vs FN |
| cg21162779 | 0.368   | 0.638   | -0.270    | 0.001            | MMEL1                 | Hypomethylated in FP vs FN |
| cg06490988 | 0.279   | 0.570   | -0.291    | 0.001            | GATA2                 | Hypomethylated in FP vs FN |

### Supplementary Table 7 (continued)

| Probe      | FP.mean | FN.mean | Mean.diff | Adjusted.P.value | Promoter.related.gene | Category                   |
|------------|---------|---------|-----------|------------------|-----------------------|----------------------------|
| cg22172230 | 0.099   | 0.397   | -0.298    | 0.001            | SWAP70                | Hypomethylated in FP vs FN |
| cg08514765 | 0.258   | 0.509   | -0.251    | 0.001            | MMP15                 | Hypomethylated in FP vs FN |
| cg00688941 | 0.402   | 0.658   | -0.256    | 0.001            | NA                    | Hypomethylated in FP vs FN |
| cg12264626 | 0.159   | 0.431   | -0.272    | 0.001            | CA3                   | Hypomethylated in FP vs FN |
| cg10222027 | 0.109   | 0.386   | -0.277    | 0.002            | NA                    | Hypomethylated in FP vs FN |
| cg00323305 | 0.298   | 0.642   | -0.344    | 0.002            | THRB                  | Hypomethylated in FP vs FN |
| cg03061916 | 0.416   | 0.667   | -0.251    | 0.002            | NA                    | Hypomethylated in FP vs FN |
| cg23902610 | 0.409   | 0.674   | -0.265    | 0.002            | NA                    | Hypomethylated in FP vs FN |
| cg24110050 | 0.320   | 0.616   | -0.296    | 0.002            | TCTEX1D1              | Hypomethylated in FP vs FN |
| cg00489652 | 0.290   | 0.550   | -0.260    | 0.002            | CLSTN3_RBP5           | Hypomethylated in FP vs FN |
| cg12302070 | 0.218   | 0.494   | -0.276    | 0.002            | KCNH7                 | Hypomethylated in FP vs FN |
| cg00642359 | 0.348   | 0.599   | -0.251    | 0.002            | TBX5                  | Hypomethylated in FP vs FN |
| cg07160746 | 0.148   | 0.483   | -0.335    | 0.002            | NA                    | Hypomethylated in FP vs FN |
| cg10236452 | 0.344   | 0.668   | -0.324    | 0.002            | NA                    | Hypomethylated in FP vs FN |
| cg07354861 | 0.125   | 0.453   | -0.329    | 0.002            | C11orf93              | Hypomethylated in FP vs FN |
| cg14355482 | 0.417   | 0.683   | -0.266    | 0.002            | NA                    | Hypomethylated in FP vs FN |
| cg13259925 | 0.245   | 0.497   | -0.252    | 0.002            | NA                    | Hypomethylated in FP vs FN |
| cg02518135 | 0.327   | 0.602   | -0.275    | 0.002            | NA                    | Hypomethylated in FP vs FN |
| cg26881527 | 0.372   | 0.661   | -0.289    | 0.002            | NA                    | Hypomethylated in FP vs FN |
| cg08071609 | 0.307   | 0.625   | -0.317    | 0.002            | NA                    | Hypomethylated in FP vs FN |
| cg17833265 | 0.278   | 0.580   | -0.302    | 0.002            | NA                    | Hypomethylated in FP vs FN |
| cg06610849 | 0.100   | 0.381   | -0.281    | 0.002            | NA                    | Hypomethylated in FP vs FN |
| cg24851854 | 0.460   | 0.758   | -0.298    | 0.002            | TACSTD2               | Hypomethylated in FP vs FN |
| cg27493010 | 0.336   | 0.621   | -0.285    | 0.002            | NA                    | Hypomethylated in FP vs FN |
| cg06715661 | 0.233   | 0.500   | -0.267    | 0.002            | NA                    | Hypomethylated in FP vs FN |

### Supplementary Table 7 (continued)

| Probe      | FP.mean | FN.mean | Mean.diff | Adjusted.P.value | Promoter.related.gene | Category                   |
|------------|---------|---------|-----------|------------------|-----------------------|----------------------------|
| cg20606555 | 0.304   | 0.566   | -0.262    | 0.002            | NA                    | Hypomethylated in FP vs FN |
| cg05099537 | 0.358   | 0.657   | -0.298    | 0.002            | NA                    | Hypomethylated in FP vs FN |
| cg11414709 | 0.121   | 0.412   | -0.291    | 0.002            | SCAND3                | Hypomethylated in FP vs FN |
| cg04059773 | 0.198   | 0.453   | -0.255    | 0.002            | NA                    | Hypomethylated in FP vs FN |
| cg27343801 | 0.362   | 0.628   | -0.266    | 0.002            | NA                    | Hypomethylated in FP vs FN |
| cg25583491 | 0.169   | 0.450   | -0.280    | 0.002            | GPR150                | Hypomethylated in FP vs FN |
| cg25728685 | 0.212   | 0.525   | -0.313    | 0.002            | NA                    | Hypomethylated in FP vs FN |
| cg01452847 | 0.135   | 0.458   | -0.323    | 0.002            | MIR196A1              | Hypomethylated in FP vs FN |
| cg10947408 | 0.363   | 0.647   | -0.284    | 0.002            | NA                    | Hypomethylated in FP vs FN |
| cg04062391 | 0.130   | 0.409   | -0.279    | 0.002            | NA                    | Hypomethylated in FP vs FN |
| cg05645316 | 0.394   | 0.666   | -0.272    | 0.002            | LIPJ                  | Hypomethylated in FP vs FN |
| cg18091469 | 0.167   | 0.457   | -0.290    | 0.002            | NA                    | Hypomethylated in FP vs FN |
| cg14093610 | 0.312   | 0.571   | -0.259    | 0.002            | CCDC140               | Hypomethylated in FP vs FN |
| cg01071314 | 0.344   | 0.637   | -0.294    | 0.002            | NA                    | Hypomethylated in FP vs FN |
| cg24173049 | 0.236   | 0.531   | -0.295    | 0.002            | SLC16A13              | Hypomethylated in FP vs FN |
| cg01791371 | 0.202   | 0.494   | -0.292    | 0.002            | NA                    | Hypomethylated in FP vs FN |
| cg16306115 | 0.243   | 0.511   | -0.269    | 0.002            | KAAG1_DCDC2           | Hypomethylated in FP vs FN |
| cg12526614 | 0.453   | 0.704   | -0.251    | 0.002            | NA                    | Hypomethylated in FP vs FN |
| cg12146864 | 0.375   | 0.629   | -0.254    | 0.002            | NA                    | Hypomethylated in FP vs FN |
| cg23610736 | 0.441   | 0.695   | -0.254    | 0.002            | NA                    | Hypomethylated in FP vs FN |
| cg08647951 | 0.481   | 0.740   | -0.259    | 0.002            | NA                    | Hypomethylated in FP vs FN |
| cg01083633 | 0.425   | 0.721   | -0.297    | 0.002            | NA                    | Hypomethylated in FP vs FN |
| cg21097881 | 0.106   | 0.380   | -0.274    | 0.002            | NA                    | Hypomethylated in FP vs FN |
| cg02458062 | 0.519   | 0.770   | -0.251    | 0.002            | NA                    | Hypomethylated in FP vs FN |
| cg05474726 | 0.307   | 0.579   | -0.272    | 0.002            | MIR124-2              | Hypomethylated in FP vs FN |

### Supplementary Table 7 (continued)

| Probe      | FP.mean | FN.mean | Mean.diff | Adjusted.P.value | Promoter.related.gene | Category                   |
|------------|---------|---------|-----------|------------------|-----------------------|----------------------------|
| cg08713073 | 0.387   | 0.649   | -0.262    | 0.002            | NA                    | Hypomethylated in FP vs FN |
| cg17202313 | 0.090   | 0.374   | -0.283    | 0.002            | NA                    | Hypomethylated in FP vs FN |
| cg00347757 | 0.156   | 0.410   | -0.254    | 0.002            | GJB2                  | Hypomethylated in FP vs FN |
| cg14701491 | 0.393   | 0.715   | -0.322    | 0.002            | NA                    | Hypomethylated in FP vs FN |
| cg13577505 | 0.127   | 0.387   | -0.261    | 0.002            | NA                    | Hypomethylated in FP vs FN |
| cg17616677 | 0.348   | 0.629   | -0.282    | 0.002            | NA                    | Hypomethylated in FP vs FN |
| cg07842327 | 0.423   | 0.681   | -0.258    | 0.002            | NA                    | Hypomethylated in FP vs FN |
| cg23201812 | 0.240   | 0.490   | -0.250    | 0.002            | NA                    | Hypomethylated in FP vs FN |
| cg05347965 | 0.204   | 0.484   | -0.281    | 0.002            | NA                    | Hypomethylated in FP vs FN |
| cg06508320 | 0.111   | 0.366   | -0.255    | 0.002            | NA                    | Hypomethylated in FP vs FN |
| cg24675673 | 0.335   | 0.588   | -0.253    | 0.002            | NA                    | Hypomethylated in FP vs FN |
| cg22757399 | 0.251   | 0.612   | -0.362    | 0.002            | NA                    | Hypomethylated in FP vs FN |
| cg00243480 | 0.475   | 0.734   | -0.259    | 0.002            | NA                    | Hypomethylated in FP vs FN |
| cg07301329 | 0.217   | 0.474   | -0.257    | 0.002            | NA                    | Hypomethylated in FP vs FN |
| cg05593707 | 0.223   | 0.480   | -0.257    | 0.002            | NA                    | Hypomethylated in FP vs FN |
| cg23901852 | 0.067   | 0.377   | -0.310    | 0.002            | FAT4                  | Hypomethylated in FP vs FN |
| cg06531379 | 0.264   | 0.539   | -0.275    | 0.002            | NA                    | Hypomethylated in FP vs FN |
| cg03778029 | 0.291   | 0.615   | -0.324    | 0.002            | CCDC68                | Hypomethylated in FP vs FN |
| cg04162059 | 0.240   | 0.527   | -0.287    | 0.002            | C12orf56              | Hypomethylated in FP vs FN |
| cg12513481 | 0.233   | 0.495   | -0.261    | 0.002            | SKAP1                 | Hypomethylated in FP vs FN |
| cg21510348 | 0.417   | 0.679   | -0.261    | 0.002            | NA                    | Hypomethylated in FP vs FN |
| cg06489728 | 0.558   | 0.809   | -0.251    | 0.002            | NA                    | Hypomethylated in FP vs FN |
| cg00170003 | 0.157   | 0.445   | -0.288    | 0.002            | NA                    | Hypomethylated in FP vs FN |
| cg24996565 | 0.312   | 0.577   | -0.265    | 0.002            | TCL1A                 | Hypomethylated in FP vs FN |
| cg07710266 | 0.356   | 0.627   | -0.271    | 0.002            | NA                    | Hypomethylated in FP vs FN |

### Supplementary Table 7 (continued)

| Probe      | FP.mean | FN.mean | Mean.diff | Adjusted.P.value | Promoter.related.gene | Category                   |
|------------|---------|---------|-----------|------------------|-----------------------|----------------------------|
| cg06437396 | 0.210   | 0.484   | -0.274    | 0.002            | NA                    | Hypomethylated in FP vs FN |
| cg21139312 | 0.349   | 0.603   | -0.254    | 0.002            | NA                    | Hypomethylated in FP vs FN |
| cg01723148 | 0.289   | 0.611   | -0.321    | 0.002            | NA                    | Hypomethylated in FP vs FN |
| cg17278447 | 0.330   | 0.590   | -0.260    | 0.002            | NA                    | Hypomethylated in FP vs FN |
| cg07817055 | 0.396   | 0.658   | -0.262    | 0.002            | NA                    | Hypomethylated in FP vs FN |
| cg06878649 | 0.475   | 0.728   | -0.253    | 0.002            | NA                    | Hypomethylated in FP vs FN |
| cg02844545 | 0.252   | 0.530   | -0.278    | 0.002            | GCM2                  | Hypomethylated in FP vs FN |
| cg10443049 | 0.278   | 0.561   | -0.283    | 0.002            | NA                    | Hypomethylated in FP vs FN |
| cg18803104 | 0.553   | 0.804   | -0.251    | 0.002            | NA                    | Hypomethylated in FP vs FN |
| cg01022219 | 0.552   | 0.813   | -0.261    | 0.002            | NA                    | Hypomethylated in FP vs FN |
| cg26255807 | 0.196   | 0.470   | -0.274    | 0.002            | NA                    | Hypomethylated in FP vs FN |
| cg04546993 | 0.252   | 0.517   | -0.265    | 0.002            | NA                    | Hypomethylated in FP vs FN |
| cg10242160 | 0.290   | 0.571   | -0.281    | 0.002            | NA                    | Hypomethylated in FP vs FN |
| cg09459548 | 0.298   | 0.551   | -0.254    | 0.002            | NA                    | Hypomethylated in FP vs FN |
| cg14978994 | 0.275   | 0.532   | -0.257    | 0.002            | NA                    | Hypomethylated in FP vs FN |
| cg01153385 | 0.472   | 0.726   | -0.254    | 0.002            | NA                    | Hypomethylated in FP vs FN |
| cg25400396 | 0.251   | 0.558   | -0.307    | 0.002            | ZNF814                | Hypomethylated in FP vs FN |
| cg08657361 | 0.211   | 0.519   | -0.307    | 0.002            | NA                    | Hypomethylated in FP vs FN |
| cg05080330 | 0.155   | 0.467   | -0.312    | 0.002            | PHF11                 | Hypomethylated in FP vs FN |
| cg17462200 | 0.338   | 0.615   | -0.277    | 0.002            | TBX5                  | Hypomethylated in FP vs FN |
| cg15285250 | 0.233   | 0.510   | -0.277    | 0.002            | NA                    | Hypomethylated in FP vs FN |
| cg19567689 | 0.282   | 0.560   | -0.278    | 0.002            | NA                    | Hypomethylated in FP vs FN |
| cg13321967 | 0.103   | 0.428   | -0.325    | 0.002            | NA                    | Hypomethylated in FP vs FN |
| cg26774079 | 0.221   | 0.496   | -0.275    | 0.002            | CLUL1                 | Hypomethylated in FP vs FN |
| cg12864185 | 0.248   | 0.527   | -0.279    | 0.002            | NA                    | Hypomethylated in FP vs FN |



### Supplementary Table 7 (continued)

| Probe      | FP.mean | FN.mean | Mean.diff | Adjusted.P.value | Promoter.related.gene | Category                   |
|------------|---------|---------|-----------|------------------|-----------------------|----------------------------|
| cg20536794 | 0.357   | 0.619   | -0.262    | 0.002            | NA                    | Hypomethylated in FP vs FN |
| cg15208756 | 0.142   | 0.393   | -0.251    | 0.002            | LOC441046             | Hypomethylated in FP vs FN |
| cg11888982 | 0.410   | 0.661   | -0.251    | 0.002            | NA                    | Hypomethylated in FP vs FN |
| cg18793404 | 0.329   | 0.645   | -0.316    | 0.002            | NA                    | Hypomethylated in FP vs FN |
| cg26005196 | 0.423   | 0.681   | -0.258    | 0.002            | NA                    | Hypomethylated in FP vs FN |
| cg07211875 | 0.169   | 0.424   | -0.256    | 0.002            | ADCYAP1               | Hypomethylated in FP vs FN |
| cg06544405 | 0.331   | 0.590   | -0.259    | 0.002            | NA                    | Hypomethylated in FP vs FN |
| cg09736968 | 0.127   | 0.395   | -0.268    | 0.002            | NA                    | Hypomethylated in FP vs FN |
| cg19628148 | 0.208   | 0.499   | -0.291    | 0.002            | NA                    | Hypomethylated in FP vs FN |
| cg13896192 | 0.424   | 0.678   | -0.254    | 0.002            | NA                    | Hypomethylated in FP vs FN |
| cg09765089 | 0.215   | 0.598   | -0.383    | 0.002            | NA                    | Hypomethylated in FP vs FN |
| cg08289130 | 0.445   | 0.731   | -0.286    | 0.002            | NA                    | Hypomethylated in FP vs FN |
| cg07466807 | 0.290   | 0.542   | -0.252    | 0.002            | NA                    | Hypomethylated in FP vs FN |
| cg04963514 | 0.310   | 0.606   | -0.296    | 0.002            | NA                    | Hypomethylated in FP vs FN |
| cg04661382 | 0.247   | 0.504   | -0.257    | 0.002            | NA                    | Hypomethylated in FP vs FN |
| cg20491573 | 0.359   | 0.626   | -0.267    | 0.002            | NA                    | Hypomethylated in FP vs FN |
| cg06661242 | 0.182   | 0.445   | -0.264    | 0.002            | NA                    | Hypomethylated in FP vs FN |
| cg18856652 | 0.101   | 0.373   | -0.272    | 0.002            | NA                    | Hypomethylated in FP vs FN |
| cg12080882 | 0.357   | 0.608   | -0.251    | 0.002            | NA                    | Hypomethylated in FP vs FN |
| cg20136855 | 0.373   | 0.639   | -0.266    | 0.002            | NA                    | Hypomethylated in FP vs FN |
| cg00346208 | 0.134   | 0.422   | -0.288    | 0.002            | NA                    | Hypomethylated in FP vs FN |
| cg03948727 | 0.431   | 0.697   | -0.266    | 0.002            | TMC3                  | Hypomethylated in FP vs FN |
| cg07460376 | 0.135   | 0.448   | -0.313    | 0.002            | ZNF681                | Hypomethylated in FP vs FN |
| cg07748741 | 0.424   | 0.681   | -0.257    | 0.002            | NA                    | Hypomethylated in FP vs FN |
| cg04139849 | 0.176   | 0.458   | -0.282    | 0.002            | FLJ44817              | Hypomethylated in FP vs FN |

### Supplementary Table 7 (continued)

| Probe      | FP.mean | FN.mean | Mean.diff | Adjusted.P.value | Promoter.related.gene | Category                   |
|------------|---------|---------|-----------|------------------|-----------------------|----------------------------|
| cg25220625 | 0.075   | 0.360   | -0.285    | 0.002            | NA                    | Hypomethylated in FP vs FN |
| cg20901246 | 0.093   | 0.346   | -0.253    | 0.002            | NA                    | Hypomethylated in FP vs FN |
| cg09788416 | 0.224   | 0.541   | -0.317    | 0.002            | NA                    | Hypomethylated in FP vs FN |
| cg01610857 | 0.160   | 0.455   | -0.295    | 0.002            | NA                    | Hypomethylated in FP vs FN |
| cg23770904 | 0.116   | 0.449   | -0.332    | 0.002            | GATA5                 | Hypomethylated in FP vs FN |
| cg25283465 | 0.259   | 0.525   | -0.266    | 0.002            | NA                    | Hypomethylated in FP vs FN |
| cg12073779 | 0.388   | 0.642   | -0.253    | 0.002            | CRYGD                 | Hypomethylated in FP vs FN |
| cg06207836 | 0.473   | 0.738   | -0.265    | 0.002            | NA                    | Hypomethylated in FP vs FN |
| cg16459519 | 0.152   | 0.446   | -0.294    | 0.002            | SYT15                 | Hypomethylated in FP vs FN |
| cg24947777 | 0.428   | 0.693   | -0.265    | 0.002            | NA                    | Hypomethylated in FP vs FN |
| cg12332415 | 0.251   | 0.606   | -0.354    | 0.002            | NA                    | Hypomethylated in FP vs FN |
| cg11390073 | 0.154   | 0.441   | -0.287    | 0.002            | NA                    | Hypomethylated in FP vs FN |
| cg16005697 | 0.449   | 0.700   | -0.251    | 0.002            | NA                    | Hypomethylated in FP vs FN |
| cg07791987 | 0.581   | 0.840   | -0.259    | 0.002            | NA                    | Hypomethylated in FP vs FN |
| cg03513309 | 0.327   | 0.595   | -0.268    | 0.002            | NA                    | Hypomethylated in FP vs FN |
| cg10382221 | 0.232   | 0.506   | -0.273    | 0.002            | MIR152                | Hypomethylated in FP vs FN |
| cg21389753 | 0.173   | 0.452   | -0.280    | 0.002            | NA                    | Hypomethylated in FP vs FN |
| cg22584138 | 0.351   | 0.607   | -0.256    | 0.002            | NA                    | Hypomethylated in FP vs FN |
| cg21554861 | 0.248   | 0.527   | -0.280    | 0.002            | EIF4E                 | Hypomethylated in FP vs FN |
| cg04988514 | 0.283   | 0.564   | -0.281    | 0.002            | GRWD1                 | Hypomethylated in FP vs FN |
| cg15081566 | 0.145   | 0.495   | -0.350    | 0.002            | C11orf93              | Hypomethylated in FP vs FN |
| cg15371806 | 0.346   | 0.601   | -0.256    | 0.002            | KIF25                 | Hypomethylated in FP vs FN |
| cg10645314 | 0.403   | 0.667   | -0.265    | 0.002            | ALLC                  | Hypomethylated in FP vs FN |
| cg08173515 | 0.222   | 0.518   | -0.295    | 0.002            | NA                    | Hypomethylated in FP vs FN |
| cg22864337 | 0.093   | 0.369   | -0.276    | 0.002            | NA                    | Hypomethylated in FP vs FN |

### Supplementary Table 7 (continued)

| Probe      | FP.mean | FN.mean | Mean.diff | Adjusted.P.value | Promoter.related.gene | Category                   |
|------------|---------|---------|-----------|------------------|-----------------------|----------------------------|
| cg20783424 | 0.144   | 0.400   | -0.256    | 0.002            | MYEOV2                | Hypomethylated in FP vs FN |
| cg05937737 | 0.262   | 0.564   | -0.302    | 0.002            | NA                    | Hypomethylated in FP vs FN |
| cg01029840 | 0.108   | 0.429   | -0.321    | 0.002            | NA                    | Hypomethylated in FP vs FN |
| cg02536065 | 0.398   | 0.655   | -0.257    | 0.002            | NA                    | Hypomethylated in FP vs FN |
| cg01961447 | 0.144   | 0.409   | -0.265    | 0.002            | NA                    | Hypomethylated in FP vs FN |
| cg12817782 | 0.382   | 0.645   | -0.263    | 0.002            | NA                    | Hypomethylated in FP vs FN |
| cg22471726 | 0.274   | 0.524   | -0.250    | 0.002            | NA                    | Hypomethylated in FP vs FN |
| cg08568720 | 0.085   | 0.341   | -0.255    | 0.002            | GATA5                 | Hypomethylated in FP vs FN |
| cg24856064 | 0.201   | 0.468   | -0.267    | 0.002            | NA                    | Hypomethylated in FP vs FN |
| cg03680032 | 0.528   | 0.779   | -0.251    | 0.002            | SESN3                 | Hypomethylated in FP vs FN |
| cg09282497 | 0.145   | 0.447   | -0.302    | 0.002            | KCNS3                 | Hypomethylated in FP vs FN |
| cg17453460 | 0.310   | 0.591   | -0.281    | 0.002            | NA                    | Hypomethylated in FP vs FN |
| cg17408527 | 0.402   | 0.675   | -0.273    | 0.002            | ZSCAN18               | Hypomethylated in FP vs FN |
| cg18735956 | 0.331   | 0.586   | -0.255    | 0.002            | NA                    | Hypomethylated in FP vs FN |
| cg17114847 | 0.172   | 0.463   | -0.291    | 0.002            | AGBL2                 | Hypomethylated in FP vs FN |
| cg19254118 | 0.358   | 0.621   | -0.263    | 0.002            | NA                    | Hypomethylated in FP vs FN |
| cg19389293 | 0.458   | 0.756   | -0.298    | 0.002            | NA                    | Hypomethylated in FP vs FN |
| cg19239692 | 0.331   | 0.587   | -0.256    | 0.002            | NA                    | Hypomethylated in FP vs FN |
| cg06382028 | 0.323   | 0.610   | -0.287    | 0.002            | NA                    | Hypomethylated in FP vs FN |
| cg11760395 | 0.538   | 0.788   | -0.250    | 0.002            | NA                    | Hypomethylated in FP vs FN |
| cg00158254 | 0.102   | 0.374   | -0.272    | 0.002            | NA                    | Hypomethylated in FP vs FN |
| cg09901532 | 0.290   | 0.550   | -0.260    | 0.002            | NA                    | Hypomethylated in FP vs FN |
| cg09473359 | 0.433   | 0.690   | -0.257    | 0.002            | NA                    | Hypomethylated in FP vs FN |
| cg26272575 | 0.176   | 0.434   | -0.259    | 0.002            | KIF16B                | Hypomethylated in FP vs FN |
| cg25856383 | 0.167   | 0.450   | -0.283    | 0.002            | CYP1B1                | Hypomethylated in FP vs FN |

### Supplementary Table 7 (continued)

| Probe      | FP.mean | FN.mean | Mean.diff | Adjusted.P.value | Promoter.related.gene | Category                   |
|------------|---------|---------|-----------|------------------|-----------------------|----------------------------|
| cg13098071 | 0.348   | 0.662   | -0.313    | 0.002            | NA                    | Hypomethylated in FP vs FN |
| cg18684142 | 0.290   | 0.568   | -0.278    | 0.002            | HOXB6                 | Hypomethylated in FP vs FN |
| cg14636113 | 0.550   | 0.805   | -0.254    | 0.002            | NA                    | Hypomethylated in FP vs FN |
| cg25963980 | 0.265   | 0.515   | -0.250    | 0.002            | SLC1A2                | Hypomethylated in FP vs FN |
| cg19992633 | 0.181   | 0.471   | -0.290    | 0.002            | TCL1A                 | Hypomethylated in FP vs FN |
| cg02244386 | 0.431   | 0.693   | -0.262    | 0.002            | NA                    | Hypomethylated in FP vs FN |
| cg04101194 | 0.401   | 0.662   | -0.261    | 0.002            | SLC34A2               | Hypomethylated in FP vs FN |
| cg22607164 | 0.550   | 0.809   | -0.259    | 0.002            | NA                    | Hypomethylated in FP vs FN |
| cg01085569 | 0.410   | 0.692   | -0.282    | 0.002            | NA                    | Hypomethylated in FP vs FN |
| cg20322876 | 0.181   | 0.535   | -0.354    | 0.002            | C11orf93              | Hypomethylated in FP vs FN |
| cg19503640 | 0.547   | 0.813   | -0.266    | 0.002            | NA                    | Hypomethylated in FP vs FN |
| cg05347898 | 0.217   | 0.503   | -0.286    | 0.002            | KAAG1_DCDC2           | Hypomethylated in FP vs FN |
| cg11991617 | 0.218   | 0.478   | -0.260    | 0.002            | NA                    | Hypomethylated in FP vs FN |
| cg04972566 | 0.182   | 0.433   | -0.251    | 0.002            | NA                    | Hypomethylated in FP vs FN |
| cg07150045 | 0.332   | 0.598   | -0.266    | 0.002            | KCNH7                 | Hypomethylated in FP vs FN |
| cg26525127 | 0.172   | 0.439   | -0.267    | 0.002            | NA                    | Hypomethylated in FP vs FN |
| cg26011014 | 0.110   | 0.411   | -0.302    | 0.002            | COL9A2                | Hypomethylated in FP vs FN |
| cg25355316 | 0.208   | 0.518   | -0.310    | 0.002            | NA                    | Hypomethylated in FP vs FN |
| cg22951509 | 0.195   | 0.491   | -0.296    | 0.002            | GPR150                | Hypomethylated in FP vs FN |
| cg05837401 | 0.116   | 0.366   | -0.250    | 0.002            | NA                    | Hypomethylated in FP vs FN |
| cg03971521 | 0.319   | 0.584   | -0.265    | 0.002            | NA                    | Hypomethylated in FP vs FN |
| cg07471943 | 0.356   | 0.647   | -0.291    | 0.002            | NA                    | Hypomethylated in FP vs FN |
| cg19474047 | 0.307   | 0.623   | -0.316    | 0.002            | NA                    | Hypomethylated in FP vs FN |
| cg15140703 | 0.297   | 0.622   | -0.325    | 0.002            | STAG3_GPC2            | Hypomethylated in FP vs FN |
| cg00924255 | 0.218   | 0.490   | -0.272    | 0.002            | NA                    | Hypomethylated in FP vs FN |

### Supplementary Table 7 (continued)

| Probe      | FP.mean | FN.mean | Mean.diff | Adjusted.P.value | Promoter.related.gene | Category                   |
|------------|---------|---------|-----------|------------------|-----------------------|----------------------------|
| cg24030622 | 0.392   | 0.657   | -0.265    | 0.002            | NA                    | Hypomethylated in FP vs FN |
| cg16918905 | 0.498   | 0.755   | -0.257    | 0.002            | NA                    | Hypomethylated in FP vs FN |
| cg13997668 | 0.212   | 0.502   | -0.291    | 0.002            | NA                    | Hypomethylated in FP vs FN |
| cg04621893 | 0.408   | 0.710   | -0.302    | 0.002            | NA                    | Hypomethylated in FP vs FN |
| cg24462476 | 0.325   | 0.637   | -0.311    | 0.002            | NA                    | Hypomethylated in FP vs FN |
| cg06807397 | 0.165   | 0.446   | -0.281    | 0.002            | NA                    | Hypomethylated in FP vs FN |
| cg27349909 | 0.362   | 0.637   | -0.275    | 0.002            | NA                    | Hypomethylated in FP vs FN |
| cg27235662 | 0.393   | 0.653   | -0.260    | 0.002            | CLDN16                | Hypomethylated in FP vs FN |
| cg13954667 | 0.264   | 0.536   | -0.272    | 0.002            | NA                    | Hypomethylated in FP vs FN |
| cg17206850 | 0.348   | 0.651   | -0.303    | 0.002            | NA                    | Hypomethylated in FP vs FN |
| cg20185461 | 0.256   | 0.507   | -0.251    | 0.002            | NA                    | Hypomethylated in FP vs FN |
| cg16389456 | 0.439   | 0.706   | -0.267    | 0.002            | NA                    | Hypomethylated in FP vs FN |
| cg24280645 | 0.195   | 0.546   | -0.351    | 0.002            | NA                    | Hypomethylated in FP vs FN |
| cg14730445 | 0.083   | 0.353   | -0.270    | 0.002            | SLC5A8                | Hypomethylated in FP vs FN |
| cg18647449 | 0.351   | 0.611   | -0.260    | 0.002            | NA                    | Hypomethylated in FP vs FN |
| cg15316843 | 0.304   | 0.659   | -0.356    | 0.002            | NA                    | Hypomethylated in FP vs FN |
| cg17997207 | 0.453   | 0.725   | -0.272    | 0.002            | NA                    | Hypomethylated in FP vs FN |
| cg27492458 | 0.336   | 0.640   | -0.304    | 0.002            | NA                    | Hypomethylated in FP vs FN |
| cg26752576 | 0.520   | 0.780   | -0.260    | 0.002            | NA                    | Hypomethylated in FP vs FN |
| cg14781189 | 0.237   | 0.520   | -0.283    | 0.002            | KCNH7                 | Hypomethylated in FP vs FN |
| cg10528482 | 0.289   | 0.543   | -0.254    | 0.002            | SLC9A3                | Hypomethylated in FP vs FN |
| cg07095230 | 0.216   | 0.505   | -0.289    | 0.002            | NA                    | Hypomethylated in FP vs FN |
| cg18186394 | 0.137   | 0.392   | -0.255    | 0.002            | COL9A2                | Hypomethylated in FP vs FN |
| cg22321089 | 0.395   | 0.661   | -0.266    | 0.002            | NA                    | Hypomethylated in FP vs FN |
| cg12499130 | 0.144   | 0.428   | -0.284    | 0.002            | SYT15                 | Hypomethylated in FP vs FN |

### Supplementary Table 7 (continued)

| Probe      | FP.mean | FN.mean | Mean.diff | Adjusted.P.value | Promoter.related.gene | Category                   |
|------------|---------|---------|-----------|------------------|-----------------------|----------------------------|
| cg04786857 | 0.284   | 0.589   | -0.305    | 0.002            | NA                    | Hypomethylated in FP vs FN |
| cg17242351 | 0.156   | 0.434   | -0.278    | 0.002            | NA                    | Hypomethylated in FP vs FN |
| cg05845592 | 0.117   | 0.381   | -0.264    | 0.002            | SULT1A1               | Hypomethylated in FP vs FN |
| cg24529280 | 0.145   | 0.415   | -0.270    | 0.002            | NA                    | Hypomethylated in FP vs FN |
| cg20704772 | 0.219   | 0.524   | -0.304    | 0.002            | NA                    | Hypomethylated in FP vs FN |
| cg18477674 | 0.260   | 0.586   | -0.326    | 0.002            | NA                    | Hypomethylated in FP vs FN |
| cg02423318 | 0.272   | 0.562   | -0.291    | 0.002            | NA                    | Hypomethylated in FP vs FN |
| cg21851351 | 0.148   | 0.404   | -0.256    | 0.002            | NA                    | Hypomethylated in FP vs FN |
| cg18117367 | 0.341   | 0.595   | -0.254    | 0.002            | PCDHA7                | Hypomethylated in FP vs FN |
| cg13446772 | 0.258   | 0.541   | -0.283    | 0.002            | C12orf56              | Hypomethylated in FP vs FN |
| cg16095767 | 0.129   | 0.432   | -0.303    | 0.002            | NA                    | Hypomethylated in FP vs FN |
| cg08803500 | 0.187   | 0.443   | -0.255    | 0.002            | NA                    | Hypomethylated in FP vs FN |
| cg15244049 | 0.248   | 0.522   | -0.274    | 0.002            | GCM2                  | Hypomethylated in FP vs FN |
| cg12468774 | 0.272   | 0.556   | -0.284    | 0.003            | CCDC36                | Hypomethylated in FP vs FN |
| cg01138867 | 0.144   | 0.422   | -0.278    | 0.003            | GABRB2                | Hypomethylated in FP vs FN |
| cg12226028 | 0.369   | 0.660   | -0.291    | 0.003            | NA                    | Hypomethylated in FP vs FN |
| cg16969368 | 0.258   | 0.520   | -0.261    | 0.003            | DHX40                 | Hypomethylated in FP vs FN |
| cg06410191 | 0.350   | 0.610   | -0.260    | 0.003            | LVRN                  | Hypomethylated in FP vs FN |
| cg00248828 | 0.277   | 0.544   | -0.267    | 0.003            | C17orf50              | Hypomethylated in FP vs FN |
| cg06594404 | 0.303   | 0.611   | -0.308    | 0.003            | NA                    | Hypomethylated in FP vs FN |
| cg18852515 | 0.439   | 0.699   | -0.260    | 0.003            | NA                    | Hypomethylated in FP vs FN |
| cg11605903 | 0.297   | 0.597   | -0.301    | 0.003            | NA                    | Hypomethylated in FP vs FN |
| cg14361458 | 0.163   | 0.429   | -0.267    | 0.003            | NA                    | Hypomethylated in FP vs FN |
| cg08848140 | 0.302   | 0.594   | -0.292    | 0.003            | NA                    | Hypomethylated in FP vs FN |
| cg02289189 | 0.166   | 0.479   | -0.313    | 0.003            | PHF11                 | Hypomethylated in FP vs FN |

### Supplementary Table 7 (continued)

| Probe      | FP.mean | FN.mean | Mean.diff | Adjusted.P.value | Promoter.related.gene | Category                   |
|------------|---------|---------|-----------|------------------|-----------------------|----------------------------|
| cg22608492 | 0.402   | 0.665   | -0.263    | 0.003            | NA                    | Hypomethylated in FP vs FN |
| cg07445246 | 0.358   | 0.638   | -0.280    | 0.003            | TCL1A                 | Hypomethylated in FP vs FN |
| cg00933411 | 0.356   | 0.626   | -0.270    | 0.003            | DLC1                  | Hypomethylated in FP vs FN |
| cg20300343 | 0.276   | 0.545   | -0.270    | 0.003            | NA                    | Hypomethylated in FP vs FN |
| cg01988129 | 0.254   | 0.571   | -0.317    | 0.003            | NA                    | Hypomethylated in FP vs FN |
| cg14516100 | 0.303   | 0.611   | -0.309    | 0.003            | NA                    | Hypomethylated in FP vs FN |
| cg26064774 | 0.189   | 0.461   | -0.272    | 0.003            | NA                    | Hypomethylated in FP vs FN |
| cg01923218 | 0.072   | 0.333   | -0.261    | 0.003            | CCDC67                | Hypomethylated in FP vs FN |
| cg10906729 | 0.253   | 0.505   | -0.251    | 0.003            | HOXB6                 | Hypomethylated in FP vs FN |
| cg01839464 | 0.138   | 0.399   | -0.262    | 0.003            | NA                    | Hypomethylated in FP vs FN |
| cg26425933 | 0.122   | 0.389   | -0.267    | 0.003            | NA                    | Hypomethylated in FP vs FN |
| cg25874119 | 0.176   | 0.448   | -0.272    | 0.003            | NA                    | Hypomethylated in FP vs FN |
| cg19757382 | 0.342   | 0.592   | -0.251    | 0.003            | MYEOV2                | Hypomethylated in FP vs FN |
| cg12984729 | 0.192   | 0.490   | -0.298    | 0.003            | NA                    | Hypomethylated in FP vs FN |
| cg22509189 | 0.156   | 0.414   | -0.258    | 0.003            | NA                    | Hypomethylated in FP vs FN |
| cg03947979 | 0.313   | 0.597   | -0.283    | 0.003            | NA                    | Hypomethylated in FP vs FN |
| cg18451022 | 0.181   | 0.462   | -0.280    | 0.003            | CYP1B1                | Hypomethylated in FP vs FN |
| cg08126211 | 0.281   | 0.556   | -0.275    | 0.003            | KAAG1_DCDC2           | Hypomethylated in FP vs FN |
| cg09373037 | 0.200   | 0.503   | -0.302    | 0.003            | SYT15                 | Hypomethylated in FP vs FN |
| cg24101359 | 0.197   | 0.469   | -0.272    | 0.003            | GNMT                  | Hypomethylated in FP vs FN |
| cg26864230 | 0.156   | 0.415   | -0.259    | 0.003            | NA                    | Hypomethylated in FP vs FN |
| cg10703619 | 0.412   | 0.689   | -0.277    | 0.003            | NA                    | Hypomethylated in FP vs FN |
| cg10980102 | 0.381   | 0.641   | -0.260    | 0.003            | NA                    | Hypomethylated in FP vs FN |
| cg11053304 | 0.189   | 0.477   | -0.288    | 0.003            | NA                    | Hypomethylated in FP vs FN |
| cg05728019 | 0.178   | 0.481   | -0.302    | 0.003            | NA                    | Hypomethylated in FP vs FN |

### Supplementary Table 7 (continued)

| Probe      | FP.mean | FN.mean | Mean.diff | Adjusted.P.value | Promoter.related.gene | Category                   |
|------------|---------|---------|-----------|------------------|-----------------------|----------------------------|
| cg06488443 | 0.196   | 0.464   | -0.267    | 0.003            | NA                    | Hypomethylated in FP vs FN |
| cg00149684 | 0.399   | 0.652   | -0.253    | 0.003            | NA                    | Hypomethylated in FP vs FN |
| cg14669379 | 0.311   | 0.568   | -0.257    | 0.003            | NA                    | Hypomethylated in FP vs FN |
| cg14192160 | 0.120   | 0.422   | -0.302    | 0.003            | NA                    | Hypomethylated in FP vs FN |
| cg20466895 | 0.328   | 0.590   | -0.262    | 0.003            | NA                    | Hypomethylated in FP vs FN |
| cg16996144 | 0.313   | 0.588   | -0.275    | 0.003            | TCTEX1D1              | Hypomethylated in FP vs FN |
| cg10741422 | 0.115   | 0.413   | -0.298    | 0.003            | NA                    | Hypomethylated in FP vs FN |
| cg17164063 | 0.235   | 0.505   | -0.270    | 0.003            | NA                    | Hypomethylated in FP vs FN |
| cg11671688 | 0.270   | 0.594   | -0.324    | 0.003            | GPR6                  | Hypomethylated in FP vs FN |
| cg20597013 | 0.226   | 0.568   | -0.343    | 0.003            | NA                    | Hypomethylated in FP vs FN |
| cg21237687 | 0.315   | 0.596   | -0.281    | 0.003            | ALOX12                | Hypomethylated in FP vs FN |
| cg06268694 | 0.125   | 0.398   | -0.272    | 0.003            | CELSR1                | Hypomethylated in FP vs FN |
| cg10655021 | 0.117   | 0.381   | -0.263    | 0.003            | NA                    | Hypomethylated in FP vs FN |
| cg25636665 | 0.256   | 0.530   | -0.274    | 0.003            | NA                    | Hypomethylated in FP vs FN |
| cg13197216 | 0.188   | 0.456   | -0.268    | 0.003            | NA                    | Hypomethylated in FP vs FN |
| cg03774803 | 0.211   | 0.499   | -0.288    | 0.003            | BOLL                  | Hypomethylated in FP vs FN |
| cg10721834 | 0.476   | 0.745   | -0.269    | 0.003            | NA                    | Hypomethylated in FP vs FN |
| cg16439198 | 0.274   | 0.554   | -0.279    | 0.003            | NA                    | Hypomethylated in FP vs FN |
| cg16021909 | 0.135   | 0.436   | -0.300    | 0.003            | NA                    | Hypomethylated in FP vs FN |
| cg00110785 | 0.281   | 0.545   | -0.264    | 0.003            | IGFBP1                | Hypomethylated in FP vs FN |
| cg05235610 | 0.396   | 0.669   | -0.274    | 0.003            | NA                    | Hypomethylated in FP vs FN |
| cg13603508 | 0.154   | 0.469   | -0.316    | 0.003            | CPNE8                 | Hypomethylated in FP vs FN |
| cg21109744 | 0.217   | 0.494   | -0.277    | 0.003            | CCDC37                | Hypomethylated in FP vs FN |
| cg20653075 | 0.303   | 0.559   | -0.256    | 0.003            | MIR124-2              | Hypomethylated in FP vs FN |
| cg03777459 | 0.315   | 0.576   | -0.261    | 0.003            | GATA5                 | Hypomethylated in FP vs FN |



### Supplementary Table 7 (continued)

| Probe      | FP.mean | FN.mean | Mean.diff | Adjusted.P.value | Promoter.related.gene | Category                   |
|------------|---------|---------|-----------|------------------|-----------------------|----------------------------|
| cg00884093 | 0.068   | 0.319   | -0.251    | 0.003            | CELSR1                | Hypomethylated in FP vs FN |
| cg14071179 | 0.285   | 0.539   | -0.255    | 0.003            | NA                    | Hypomethylated in FP vs FN |
| cg12417466 | 0.487   | 0.741   | -0.253    | 0.003            | ARPP-21               | Hypomethylated in FP vs FN |
| cg24948962 | 0.418   | 0.679   | -0.261    | 0.003            | NA                    | Hypomethylated in FP vs FN |
| cg22137572 | 0.334   | 0.595   | -0.260    | 0.003            | NA                    | Hypomethylated in FP vs FN |
| cg10145246 | 0.213   | 0.493   | -0.280    | 0.003            | NA                    | Hypomethylated in FP vs FN |
| cg22519422 | 0.117   | 0.371   | -0.254    | 0.003            | NA                    | Hypomethylated in FP vs FN |
| cg25825627 | 0.534   | 0.788   | -0.255    | 0.003            | NA                    | Hypomethylated in FP vs FN |
| cg27252395 | 0.191   | 0.466   | -0.274    | 0.003            | KAAG1_DCDC2           | Hypomethylated in FP vs FN |
| cg07180307 | 0.129   | 0.413   | -0.284    | 0.003            | NA                    | Hypomethylated in FP vs FN |
| cg14706475 | 0.334   | 0.591   | -0.257    | 0.003            | NA                    | Hypomethylated in FP vs FN |
| cg07078841 | 0.183   | 0.466   | -0.282    | 0.003            | CYP1B1                | Hypomethylated in FP vs FN |
| cg13862711 | 0.278   | 0.534   | -0.256    | 0.003            | NA                    | Hypomethylated in FP vs FN |
| cg18489675 | 0.395   | 0.648   | -0.253    | 0.003            | NA                    | Hypomethylated in FP vs FN |
| cg14258623 | 0.146   | 0.444   | -0.298    | 0.003            | NA                    | Hypomethylated in FP vs FN |
| cg18209835 | 0.110   | 0.372   | -0.262    | 0.003            | NA                    | Hypomethylated in FP vs FN |
| cg13364038 | 0.371   | 0.644   | -0.273    | 0.003            | NA                    | Hypomethylated in FP vs FN |
| cg14615784 | 0.297   | 0.593   | -0.296    | 0.003            | GPR150                | Hypomethylated in FP vs FN |
| cg09364020 | 0.225   | 0.484   | -0.260    | 0.003            | NA                    | Hypomethylated in FP vs FN |
| cg06369992 | 0.460   | 0.730   | -0.270    | 0.003            | NA                    | Hypomethylated in FP vs FN |
| cg25637829 | 0.436   | 0.700   | -0.265    | 0.003            | NA                    | Hypomethylated in FP vs FN |
| cg22322465 | 0.413   | 0.665   | -0.253    | 0.003            | NA                    | Hypomethylated in FP vs FN |
| cg25233685 | 0.107   | 0.405   | -0.298    | 0.003            | NA                    | Hypomethylated in FP vs FN |
| cg02993352 | 0.226   | 0.526   | -0.300    | 0.003            | NA                    | Hypomethylated in FP vs FN |
| cg03694713 | 0.201   | 0.493   | -0.291    | 0.003            | NKX2-6                | Hypomethylated in FP vs FN |

### Supplementary Table 7 (continued)

| Probe      | FP.mean | FN.mean | Mean.diff | Adjusted.P.value | Promoter.related.gene | Category                   |
|------------|---------|---------|-----------|------------------|-----------------------|----------------------------|
| cg07791578 | 0.240   | 0.502   | -0.262    | 0.003            | KAAG1_DCDC2           | Hypomethylated in FP vs FN |
| cg11149930 | 0.179   | 0.434   | -0.254    | 0.003            | NA                    | Hypomethylated in FP vs FN |
| cg06819935 | 0.363   | 0.636   | -0.272    | 0.003            | NA                    | Hypomethylated in FP vs FN |
| cg01110759 | 0.100   | 0.356   | -0.256    | 0.003            | MT1A                  | Hypomethylated in FP vs FN |
| cg17265829 | 0.091   | 0.410   | -0.319    | 0.003            | FAT4                  | Hypomethylated in FP vs FN |
| cg18750738 | 0.153   | 0.428   | -0.275    | 0.003            | NA                    | Hypomethylated in FP vs FN |
| cg06382344 | 0.156   | 0.500   | -0.343    | 0.003            | NA                    | Hypomethylated in FP vs FN |
| cg09557313 | 0.241   | 0.579   | -0.338    | 0.003            | NA                    | Hypomethylated in FP vs FN |
| cg23546474 | 0.206   | 0.511   | -0.306    | 0.003            | CCDC140               | Hypomethylated in FP vs FN |
| cg12586386 | 0.367   | 0.618   | -0.251    | 0.003            | AQP11                 | Hypomethylated in FP vs FN |
| cg15834072 | 0.167   | 0.450   | -0.283    | 0.003            | DCHS2                 | Hypomethylated in FP vs FN |
| cg18161890 | 0.227   | 0.492   | -0.264    | 0.003            | KRT72                 | Hypomethylated in FP vs FN |
| cg10305451 | 0.194   | 0.444   | -0.250    | 0.003            | NA                    | Hypomethylated in FP vs FN |
| cg27207616 | 0.384   | 0.641   | -0.257    | 0.003            | NA                    | Hypomethylated in FP vs FN |
| cg23471067 | 0.245   | 0.516   | -0.270    | 0.003            | NA                    | Hypomethylated in FP vs FN |
| cg01177928 | 0.338   | 0.665   | -0.326    | 0.003            | NA                    | Hypomethylated in FP vs FN |
| cg11517269 | 0.405   | 0.675   | -0.270    | 0.003            | ZSCAN12L1             | Hypomethylated in FP vs FN |
| cg27441225 | 0.267   | 0.520   | -0.253    | 0.003            | HOXC6                 | Hypomethylated in FP vs FN |
| cg04645914 | 0.209   | 0.482   | -0.273    | 0.003            | NA                    | Hypomethylated in FP vs FN |
| cg08707078 | 0.283   | 0.548   | -0.265    | 0.003            | NA                    | Hypomethylated in FP vs FN |
| cg03780561 | 0.380   | 0.677   | -0.297    | 0.003            | GPRC5B                | Hypomethylated in FP vs FN |
| cg16054907 | 0.326   | 0.613   | -0.287    | 0.003            | NA                    | Hypomethylated in FP vs FN |
| cg21852408 | 0.143   | 0.422   | -0.280    | 0.003            | NA                    | Hypomethylated in FP vs FN |
| cg06629130 | 0.160   | 0.466   | -0.306    | 0.003            | NA                    | Hypomethylated in FP vs FN |
| cg09085842 | 0.132   | 0.402   | -0.270    | 0.003            | HSPA1A_HSPA1L         | Hypomethylated in FP vs FN |

### Supplementary Table 7 (continued)

| Probe      | FP.mean | FN.mean | Mean.diff | Adjusted.P.value | Promoter.related.gene | Category                   |
|------------|---------|---------|-----------|------------------|-----------------------|----------------------------|
| cg01027397 | 0.172   | 0.433   | -0.261    | 0.003            | SCAND3                | Hypomethylated in FP vs FN |
| cg02938205 | 0.208   | 0.462   | -0.254    | 0.003            | CCDC36                | Hypomethylated in FP vs FN |
| cg00785941 | 0.283   | 0.546   | -0.262    | 0.003            | OR2L13                | Hypomethylated in FP vs FN |
| cg10515332 | 0.223   | 0.513   | -0.290    | 0.003            | C4orf37               | Hypomethylated in FP vs FN |
| cg01628467 | 0.448   | 0.702   | -0.254    | 0.003            | NA                    | Hypomethylated in FP vs FN |
| cg00267596 | 0.109   | 0.416   | -0.308    | 0.003            | NA                    | Hypomethylated in FP vs FN |
| cg18866015 | 0.082   | 0.362   | -0.281    | 0.003            | NA                    | Hypomethylated in FP vs FN |
| cg24384244 | 0.091   | 0.360   | -0.268    | 0.003            | ZNF662                | Hypomethylated in FP vs FN |
| cg05857758 | 0.221   | 0.503   | -0.282    | 0.003            | NA                    | Hypomethylated in FP vs FN |
| cg05516505 | 0.244   | 0.519   | -0.276    | 0.003            | NA                    | Hypomethylated in FP vs FN |
| cg13525837 | 0.063   | 0.324   | -0.262    | 0.003            | KCNV1                 | Hypomethylated in FP vs FN |
| cg01548300 | 0.357   | 0.649   | -0.292    | 0.003            | NA                    | Hypomethylated in FP vs FN |
| cg10296410 | 0.394   | 0.652   | -0.259    | 0.003            | MEI1                  | Hypomethylated in FP vs FN |
| cg07605285 | 0.309   | 0.562   | -0.253    | 0.003            | NA                    | Hypomethylated in FP vs FN |
| cg01574481 | 0.250   | 0.544   | -0.294    | 0.003            | NA                    | Hypomethylated in FP vs FN |
| cg19419291 | 0.232   | 0.512   | -0.280    | 0.003            | NA                    | Hypomethylated in FP vs FN |
| cg02162286 | 0.191   | 0.483   | -0.292    | 0.003            | NA                    | Hypomethylated in FP vs FN |
| cg11805311 | 0.270   | 0.530   | -0.260    | 0.003            | C10orf116             | Hypomethylated in FP vs FN |
| cg11409350 | 0.311   | 0.565   | -0.254    | 0.003            | NA                    | Hypomethylated in FP vs FN |
| cg27644715 | 0.411   | 0.662   | -0.251    | 0.003            | NTM                   | Hypomethylated in FP vs FN |
| cg10648197 | 0.203   | 0.499   | -0.296    | 0.003            | NA                    | Hypomethylated in FP vs FN |
| cg08931647 | 0.321   | 0.573   | -0.252    | 0.003            | MSLNL                 | Hypomethylated in FP vs FN |
| cg11788523 | 0.182   | 0.440   | -0.258    | 0.003            | ZNF418                | Hypomethylated in FP vs FN |
| cg10905898 | 0.191   | 0.460   | -0.269    | 0.003            | NA                    | Hypomethylated in FP vs FN |
| cg24928333 | 0.172   | 0.431   | -0.259    | 0.003            | NA                    | Hypomethylated in FP vs FN |

### Supplementary Table 7 (continued)

| Probe      | FP.mean | FN.mean | Mean.diff | Adjusted.P.value | Promoter.related.gene | Category                   |
|------------|---------|---------|-----------|------------------|-----------------------|----------------------------|
| cg20098471 | 0.217   | 0.509   | -0.292    | 0.003            | NA                    | Hypomethylated in FP vs FN |
| cg03749016 | 0.078   | 0.345   | -0.266    | 0.003            | NKX2-6                | Hypomethylated in FP vs FN |
| cg11990309 | 0.192   | 0.466   | -0.275    | 0.003            | NA                    | Hypomethylated in FP vs FN |
| cg06419846 | 0.373   | 0.660   | -0.286    | 0.003            | CD248                 | Hypomethylated in FP vs FN |
| cg14548882 | 0.249   | 0.506   | -0.257    | 0.003            | MORN4                 | Hypomethylated in FP vs FN |
| cg21707187 | 0.311   | 0.643   | -0.332    | 0.004            | NA                    | Hypomethylated in FP vs FN |
| cg01683794 | 0.236   | 0.497   | -0.260    | 0.004            | NA                    | Hypomethylated in FP vs FN |
| cg02156870 | 0.504   | 0.775   | -0.271    | 0.004            | NA                    | Hypomethylated in FP vs FN |
| cg07675477 | 0.343   | 0.624   | -0.281    | 0.004            | NA                    | Hypomethylated in FP vs FN |
| cg17023149 | 0.190   | 0.457   | -0.267    | 0.004            | NA                    | Hypomethylated in FP vs FN |
| cg02456087 | 0.265   | 0.546   | -0.282    | 0.004            | NA                    | Hypomethylated in FP vs FN |
| cg21889472 | 0.154   | 0.418   | -0.264    | 0.004            | NA                    | Hypomethylated in FP vs FN |
| cg10210594 | 0.487   | 0.778   | -0.291    | 0.004            | NA                    | Hypomethylated in FP vs FN |
| cg16733705 | 0.361   | 0.688   | -0.328    | 0.004            | NA                    | Hypomethylated in FP vs FN |
| cg11548303 | 0.133   | 0.385   | -0.253    | 0.004            | NA                    | Hypomethylated in FP vs FN |
| cg19254532 | 0.466   | 0.716   | -0.250    | 0.004            | NA                    | Hypomethylated in FP vs FN |
| cg11362192 | 0.219   | 0.493   | -0.274    | 0.004            | PHF11                 | Hypomethylated in FP vs FN |
| cg24589459 | 0.131   | 0.407   | -0.277    | 0.004            | BOLL                  | Hypomethylated in FP vs FN |
| cg17105014 | 0.328   | 0.612   | -0.284    | 0.004            | GYPC                  | Hypomethylated in FP vs FN |
| cg00508771 | 0.374   | 0.629   | -0.255    | 0.004            | NA                    | Hypomethylated in FP vs FN |
| cg18399075 | 0.193   | 0.449   | -0.256    | 0.004            | NA                    | Hypomethylated in FP vs FN |
| cg17692125 | 0.178   | 0.471   | -0.293    | 0.004            | BARX2                 | Hypomethylated in FP vs FN |
| cg13301003 | 0.459   | 0.711   | -0.252    | 0.004            | NA                    | Hypomethylated in FP vs FN |
| cg10599345 | 0.077   | 0.335   | -0.258    | 0.004            | MAP3K5                | Hypomethylated in FP vs FN |
| cg13180315 | 0.331   | 0.643   | -0.311    | 0.004            | NA                    | Hypomethylated in FP vs FN |

### Supplementary Table 7 (continued)

| Probe      | FP.mean | FN.mean | Mean.diff | Adjusted.P.value | Promoter.related.gene | Category                   |
|------------|---------|---------|-----------|------------------|-----------------------|----------------------------|
| cg05605052 | 0.210   | 0.511   | -0.301    | 0.004            | RPSAP58               | Hypomethylated in FP vs FN |
| cg15831060 | 0.173   | 0.433   | -0.259    | 0.004            | NA                    | Hypomethylated in FP vs FN |
| cg02202980 | 0.069   | 0.325   | -0.257    | 0.004            | C3orf15               | Hypomethylated in FP vs FN |
| cg07879739 | 0.253   | 0.565   | -0.312    | 0.004            | NA                    | Hypomethylated in FP vs FN |
| cg17251713 | 0.211   | 0.465   | -0.254    | 0.004            | NA                    | Hypomethylated in FP vs FN |
| cg12881363 | 0.287   | 0.564   | -0.276    | 0.004            | MOV10L1               | Hypomethylated in FP vs FN |
| cg10440578 | 0.257   | 0.512   | -0.255    | 0.004            | NA                    | Hypomethylated in FP vs FN |
| cg18362509 | 0.251   | 0.544   | -0.293    | 0.004            | NA                    | Hypomethylated in FP vs FN |
| cg00893522 | 0.399   | 0.673   | -0.274    | 0.004            | NA                    | Hypomethylated in FP vs FN |
| cg01176516 | 0.230   | 0.508   | -0.277    | 0.004            | NA                    | Hypomethylated in FP vs FN |
| cg22964918 | 0.076   | 0.345   | -0.269    | 0.004            | NA                    | Hypomethylated in FP vs FN |
| cg06529996 | 0.615   | 0.872   | -0.257    | 0.004            | NA                    | Hypomethylated in FP vs FN |
| cg04511041 | 0.348   | 0.618   | -0.270    | 0.004            | PCDHB18               | Hypomethylated in FP vs FN |
| cg19622623 | 0.261   | 0.518   | -0.258    | 0.004            | RASSF9                | Hypomethylated in FP vs FN |
| cg02807882 | 0.348   | 0.605   | -0.256    | 0.004            | NA                    | Hypomethylated in FP vs FN |
| cg25390440 | 0.351   | 0.637   | -0.286    | 0.004            | GYPC                  | Hypomethylated in FP vs FN |
| cg07226193 | 0.072   | 0.360   | -0.287    | 0.004            | SWAP70                | Hypomethylated in FP vs FN |
| cg20793665 | 0.386   | 0.652   | -0.266    | 0.004            | NA                    | Hypomethylated in FP vs FN |
| cg09339763 | 0.339   | 0.614   | -0.275    | 0.004            | HAND2                 | Hypomethylated in FP vs FN |
| cg18333921 | 0.134   | 0.409   | -0.275    | 0.004            | NA                    | Hypomethylated in FP vs FN |
| cg20912169 | 0.162   | 0.474   | -0.312    | 0.004            | ADHFE1                | Hypomethylated in FP vs FN |
| cg23495733 | 0.154   | 0.436   | -0.282    | 0.004            | NA                    | Hypomethylated in FP vs FN |
| cg07302677 | 0.457   | 0.717   | -0.260    | 0.004            | KCP                   | Hypomethylated in FP vs FN |
| cg11580948 | 0.295   | 0.566   | -0.271    | 0.004            | NA                    | Hypomethylated in FP vs FN |
| cg00155526 | 0.137   | 0.406   | -0.269    | 0.004            | NA                    | Hypomethylated in FP vs FN |

### Supplementary Table 7 (continued)

| Probe      | FP.mean | FN.mean | Mean.diff | Adjusted.P.value | Promoter.related.gene | Category                   |
|------------|---------|---------|-----------|------------------|-----------------------|----------------------------|
| cg22778178 | 0.132   | 0.388   | -0.256    | 0.004            | NA                    | Hypomethylated in FP vs FN |
| cg16590910 | 0.183   | 0.437   | -0.254    | 0.004            | GNMT                  | Hypomethylated in FP vs FN |
| cg20373544 | 0.430   | 0.691   | -0.260    | 0.004            | NA                    | Hypomethylated in FP vs FN |
| cg02566861 | 0.159   | 0.427   | -0.268    | 0.004            | NA                    | Hypomethylated in FP vs FN |
| cg08483376 | 0.225   | 0.522   | -0.297    | 0.004            | NA                    | Hypomethylated in FP vs FN |
| cg13141009 | 0.170   | 0.474   | -0.304    | 0.004            | NA                    | Hypomethylated in FP vs FN |
| cg00786952 | 0.107   | 0.357   | -0.250    | 0.004            | NA                    | Hypomethylated in FP vs FN |
| cg06593050 | 0.207   | 0.479   | -0.271    | 0.004            | LOC441046             | Hypomethylated in FP vs FN |
| cg10864145 | 0.108   | 0.366   | -0.258    | 0.004            | NA                    | Hypomethylated in FP vs FN |
| cg04395954 | 0.491   | 0.752   | -0.260    | 0.004            | NA                    | Hypomethylated in FP vs FN |
| cg12761825 | 0.182   | 0.447   | -0.265    | 0.004            | NA                    | Hypomethylated in FP vs FN |
| cg05184377 | 0.182   | 0.448   | -0.266    | 0.004            | NA                    | Hypomethylated in FP vs FN |
| cg04483289 | 0.302   | 0.555   | -0.253    | 0.004            | SKAP1                 | Hypomethylated in FP vs FN |
| cg22299467 | 0.143   | 0.429   | -0.286    | 0.004            | NA                    | Hypomethylated in FP vs FN |
| cg01116873 | 0.333   | 0.587   | -0.254    | 0.004            | NA                    | Hypomethylated in FP vs FN |
| cg24625136 | 0.371   | 0.648   | -0.278    | 0.004            | NA                    | Hypomethylated in FP vs FN |
| cg15721134 | 0.323   | 0.596   | -0.273    | 0.004            | NA                    | Hypomethylated in FP vs FN |
| cg09339194 | 0.160   | 0.470   | -0.310    | 0.004            | GATA5                 | Hypomethylated in FP vs FN |
| cg04707332 | 0.199   | 0.460   | -0.261    | 0.004            | NA                    | Hypomethylated in FP vs FN |
| cg20969194 | 0.210   | 0.464   | -0.253    | 0.004            | NA                    | Hypomethylated in FP vs FN |
| cg18273840 | 0.103   | 0.384   | -0.282    | 0.004            | NA                    | Hypomethylated in FP vs FN |
| cg08129583 | 0.332   | 0.603   | -0.271    | 0.004            | GYPC                  | Hypomethylated in FP vs FN |
| cg24147428 | 0.487   | 0.746   | -0.259    | 0.004            | NA                    | Hypomethylated in FP vs FN |
| cg13825574 | 0.189   | 0.456   | -0.267    | 0.004            | RNF208                | Hypomethylated in FP vs FN |
| cg10317717 | 0.372   | 0.646   | -0.274    | 0.004            | NA                    | Hypomethylated in FP vs FN |

### Supplementary Table 7 (continued)

| Probe      | FP.mean | FN.mean | Mean.diff | Adjusted.P.value | Promoter.related.gene | Category                   |
|------------|---------|---------|-----------|------------------|-----------------------|----------------------------|
| cg17444859 | 0.519   | 0.771   | -0.252    | 0.004            | NA                    | Hypomethylated in FP vs FN |
| cg16577724 | 0.503   | 0.775   | -0.272    | 0.004            | NA                    | Hypomethylated in FP vs FN |
| cg26099834 | 0.358   | 0.622   | -0.264    | 0.004            | NA                    | Hypomethylated in FP vs FN |
| cg07885629 | 0.454   | 0.705   | -0.251    | 0.004            | NA                    | Hypomethylated in FP vs FN |
| cg12864597 | 0.223   | 0.527   | -0.304    | 0.004            | GPR150                | Hypomethylated in FP vs FN |
| cg17807131 | 0.177   | 0.494   | -0.317    | 0.004            | NA                    | Hypomethylated in FP vs FN |
| cg11260046 | 0.464   | 0.719   | -0.255    | 0.004            | MEI1                  | Hypomethylated in FP vs FN |
| cg25288420 | 0.275   | 0.565   | -0.290    | 0.004            | GIPC2                 | Hypomethylated in FP vs FN |
| cg11836236 | 0.246   | 0.529   | -0.283    | 0.004            | NA                    | Hypomethylated in FP vs FN |
| cg08741898 | 0.303   | 0.577   | -0.275    | 0.004            | NA                    | Hypomethylated in FP vs FN |
| cg05996795 | 0.365   | 0.658   | -0.293    | 0.004            | NA                    | Hypomethylated in FP vs FN |
| cg17376853 | 0.487   | 0.744   | -0.257    | 0.004            | NA                    | Hypomethylated in FP vs FN |
| cg04299389 | 0.306   | 0.574   | -0.267    | 0.004            | LOC284798             | Hypomethylated in FP vs FN |
| cg08566455 | 0.153   | 0.407   | -0.254    | 0.004            | NA                    | Hypomethylated in FP vs FN |
| cg19464917 | 0.228   | 0.503   | -0.275    | 0.004            | ISL2                  | Hypomethylated in FP vs FN |
| cg18160135 | 0.285   | 0.555   | -0.270    | 0.004            | EIF4E                 | Hypomethylated in FP vs FN |
| cg03989125 | 0.094   | 0.363   | -0.269    | 0.005            | NA                    | Hypomethylated in FP vs FN |
| cg21488538 | 0.208   | 0.497   | -0.289    | 0.005            | NA                    | Hypomethylated in FP vs FN |
| cg12690369 | 0.320   | 0.583   | -0.263    | 0.005            | PTPRR                 | Hypomethylated in FP vs FN |
| cg06744545 | 0.148   | 0.406   | -0.258    | 0.005            | NA                    | Hypomethylated in FP vs FN |
| cg22695986 | 0.373   | 0.626   | -0.253    | 0.005            | NA                    | Hypomethylated in FP vs FN |
| cg24771804 | 0.209   | 0.497   | -0.288    | 0.005            | NA                    | Hypomethylated in FP vs FN |
| cg26736812 | 0.262   | 0.529   | -0.267    | 0.005            | NA                    | Hypomethylated in FP vs FN |
| cg13481969 | 0.130   | 0.413   | -0.283    | 0.005            | NA                    | Hypomethylated in FP vs FN |
| cg22044002 | 0.269   | 0.533   | -0.264    | 0.005            | NA                    | Hypomethylated in FP vs FN |

### Supplementary Table 7 (continued)

| Probe      | FP.mean | FN.mean | Mean.diff | Adjusted.P.value | Promoter.related.gene | Category                   |
|------------|---------|---------|-----------|------------------|-----------------------|----------------------------|
| cg17003395 | 0.157   | 0.422   | -0.265    | 0.005            | KIF16B                | Hypomethylated in FP vs FN |
| cg02381898 | 0.308   | 0.573   | -0.265    | 0.005            | NA                    | Hypomethylated in FP vs FN |
| cg20324206 | 0.214   | 0.473   | -0.258    | 0.005            | ONECUT2               | Hypomethylated in FP vs FN |
| cg07681935 | 0.388   | 0.646   | -0.258    | 0.005            | HAND2                 | Hypomethylated in FP vs FN |
| cg07303912 | 0.163   | 0.463   | -0.300    | 0.005            | NA                    | Hypomethylated in FP vs FN |
| cg23039195 | 0.385   | 0.661   | -0.276    | 0.005            | NA                    | Hypomethylated in FP vs FN |
| cg07870914 | 0.405   | 0.666   | -0.260    | 0.005            | NA                    | Hypomethylated in FP vs FN |
| cg07676859 | 0.121   | 0.435   | -0.315    | 0.005            | SSTR4                 | Hypomethylated in FP vs FN |
| cg17586860 | 0.198   | 0.459   | -0.261    | 0.005            | SSTR4                 | Hypomethylated in FP vs FN |
| cg10090650 | 0.381   | 0.640   | -0.259    | 0.005            | KAAG1_DCDC2           | Hypomethylated in FP vs FN |
| cg18872321 | 0.143   | 0.422   | -0.279    | 0.005            | GATA5                 | Hypomethylated in FP vs FN |
| cg25900085 | 0.277   | 0.561   | -0.284    | 0.005            | MIR124-2              | Hypomethylated in FP vs FN |
| cg19912142 | 0.484   | 0.761   | -0.277    | 0.005            | NA                    | Hypomethylated in FP vs FN |
| cg16945312 | 0.331   | 0.584   | -0.253    | 0.005            | NA                    | Hypomethylated in FP vs FN |
| cg09410317 | 0.509   | 0.764   | -0.256    | 0.005            | NA                    | Hypomethylated in FP vs FN |
| cg23079808 | 0.365   | 0.648   | -0.284    | 0.005            | LTBR                  | Hypomethylated in FP vs FN |
| cg19766441 | 0.271   | 0.560   | -0.289    | 0.005            | SLC34A2               | Hypomethylated in FP vs FN |
| cg21654383 | 0.359   | 0.667   | -0.308    | 0.005            | NA                    | Hypomethylated in FP vs FN |
| cg14896134 | 0.354   | 0.610   | -0.256    | 0.005            | NA                    | Hypomethylated in FP vs FN |
| cg04037038 | 0.157   | 0.469   | -0.313    | 0.005            | FRZB                  | Hypomethylated in FP vs FN |
| cg21166964 | 0.214   | 0.476   | -0.262    | 0.005            | NA                    | Hypomethylated in FP vs FN |
| cg18512948 | 0.286   | 0.562   | -0.277    | 0.005            | REC8                  | Hypomethylated in FP vs FN |
| cg03748376 | 0.290   | 0.603   | -0.313    | 0.005            | OR2L13                | Hypomethylated in FP vs FN |
| cg02372145 | 0.275   | 0.578   | -0.304    | 0.005            | NA                    | Hypomethylated in FP vs FN |
| cg15221604 | 0.126   | 0.406   | -0.280    | 0.005            | NA                    | Hypomethylated in FP vs FN |



### Supplementary Table 7 (continued)

| Probe      | FP.mean | FN.mean | Mean.diff | Adjusted.P.value | Promoter.related.gene | Category                   |
|------------|---------|---------|-----------|------------------|-----------------------|----------------------------|
| cg05030450 | 0.337   | 0.597   | -0.260    | 0.005            | NA                    | Hypomethylated in FP vs FN |
| cg15964468 | 0.225   | 0.518   | -0.293    | 0.005            | NA                    | Hypomethylated in FP vs FN |
| cg15484651 | 0.356   | 0.612   | -0.255    | 0.005            | TMC3                  | Hypomethylated in FP vs FN |
| cg19112957 | 0.208   | 0.487   | -0.278    | 0.005            | AGBL2                 | Hypomethylated in FP vs FN |
| cg17305181 | 0.251   | 0.524   | -0.273    | 0.005            | CRH                   | Hypomethylated in FP vs FN |
| cg00201175 | 0.201   | 0.460   | -0.259    | 0.005            | NA                    | Hypomethylated in FP vs FN |
| cg16491960 | 0.437   | 0.697   | -0.260    | 0.005            | NA                    | Hypomethylated in FP vs FN |
| cg22510337 | 0.108   | 0.383   | -0.275    | 0.005            | NA                    | Hypomethylated in FP vs FN |
| cg04094148 | 0.190   | 0.450   | -0.260    | 0.005            | BARX2                 | Hypomethylated in FP vs FN |
| cg22456162 | 0.238   | 0.529   | -0.291    | 0.005            | NA                    | Hypomethylated in FP vs FN |
| cg09720833 | 0.262   | 0.542   | -0.280    | 0.005            | NA                    | Hypomethylated in FP vs FN |
| cg01745370 | 0.231   | 0.487   | -0.256    | 0.005            | GCC2                  | Hypomethylated in FP vs FN |
| cg03654472 | 0.363   | 0.661   | -0.298    | 0.005            | NA                    | Hypomethylated in FP vs FN |
| cg04072323 | 0.180   | 0.433   | -0.253    | 0.005            | SPHKAP                | Hypomethylated in FP vs FN |
| cg01933308 | 0.266   | 0.535   | -0.269    | 0.005            | NA                    | Hypomethylated in FP vs FN |
| cg07909759 | 0.427   | 0.691   | -0.263    | 0.005            | C10orf82              | Hypomethylated in FP vs FN |
| cg03654433 | 0.171   | 0.430   | -0.259    | 0.005            | NA                    | Hypomethylated in FP vs FN |
| cg15400591 | 0.430   | 0.686   | -0.256    | 0.005            | NA                    | Hypomethylated in FP vs FN |
| cg10303487 | 0.058   | 0.331   | -0.273    | 0.005            | DPYS                  | Hypomethylated in FP vs FN |
| cg24182470 | 0.099   | 0.397   | -0.298    | 0.005            | CPNE8                 | Hypomethylated in FP vs FN |
| cg22952142 | 0.327   | 0.624   | -0.297    | 0.005            | NA                    | Hypomethylated in FP vs FN |
| cg24346905 | 0.132   | 0.393   | -0.261    | 0.005            | NA                    | Hypomethylated in FP vs FN |
| cg05552183 | 0.142   | 0.409   | -0.266    | 0.005            | GNMT                  | Hypomethylated in FP vs FN |
| cg25023908 | 0.241   | 0.530   | -0.289    | 0.005            | NA                    | Hypomethylated in FP vs FN |
| cg09061684 | 0.331   | 0.600   | -0.269    | 0.005            | NA                    | Hypomethylated in FP vs FN |

### Supplementary Table 7 (continued)

| Probe      | FP.mean | FN.mean | Mean.diff | Adjusted.P.value | Promoter.related.gene | Category                   |
|------------|---------|---------|-----------|------------------|-----------------------|----------------------------|
| cg02886375 | 0.253   | 0.525   | -0.272    | 0.005            | NA                    | Hypomethylated in FP vs FN |
| cg21249371 | 0.373   | 0.655   | -0.282    | 0.005            | KDM2B                 | Hypomethylated in FP vs FN |
| cg23137039 | 0.203   | 0.476   | -0.273    | 0.005            | PHF11                 | Hypomethylated in FP vs FN |
| cg23217512 | 0.133   | 0.391   | -0.258    | 0.005            | NA                    | Hypomethylated in FP vs FN |
| cg24534742 | 0.243   | 0.516   | -0.273    | 0.006            | NA                    | Hypomethylated in FP vs FN |
| cg18197392 | 0.141   | 0.432   | -0.292    | 0.006            | SSTR4                 | Hypomethylated in FP vs FN |
| cg16909733 | 0.141   | 0.395   | -0.254    | 0.006            | NA                    | Hypomethylated in FP vs FN |
| cg00677866 | 0.275   | 0.528   | -0.253    | 0.006            | GATA5                 | Hypomethylated in FP vs FN |
| cg07584066 | 0.296   | 0.558   | -0.263    | 0.006            | DHX40                 | Hypomethylated in FP vs FN |
| cg01135754 | 0.448   | 0.704   | -0.256    | 0.006            | NA                    | Hypomethylated in FP vs FN |
| cg00880018 | 0.288   | 0.551   | -0.263    | 0.006            | NA                    | Hypomethylated in FP vs FN |
| cg16473141 | 0.272   | 0.551   | -0.279    | 0.006            | REC8                  | Hypomethylated in FP vs FN |
| cg19777470 | 0.286   | 0.560   | -0.274    | 0.006            | NA                    | Hypomethylated in FP vs FN |
| cg03631459 | 0.507   | 0.765   | -0.258    | 0.006            | NA                    | Hypomethylated in FP vs FN |
| cg14069965 | 0.311   | 0.574   | -0.263    | 0.006            | KAAG1_DCDC2           | Hypomethylated in FP vs FN |
| cg10627839 | 0.336   | 0.630   | -0.294    | 0.006            | NA                    | Hypomethylated in FP vs FN |
| cg06781135 | 0.220   | 0.500   | -0.280    | 0.006            | LOC100270746          | Hypomethylated in FP vs FN |
| cg12479878 | 0.227   | 0.503   | -0.275    | 0.006            | NA                    | Hypomethylated in FP vs FN |
| cg10074409 | 0.345   | 0.618   | -0.273    | 0.006            | IRF6                  | Hypomethylated in FP vs FN |
| cg10927968 | 0.416   | 0.668   | -0.253    | 0.006            | NA                    | Hypomethylated in FP vs FN |
| cg05302386 | 0.067   | 0.335   | -0.268    | 0.006            | PTGDR                 | Hypomethylated in FP vs FN |
| cg27605748 | 0.117   | 0.382   | -0.265    | 0.006            | NA                    | Hypomethylated in FP vs FN |
| cg02794451 | 0.186   | 0.455   | -0.268    | 0.006            | NA                    | Hypomethylated in FP vs FN |
| cg13249593 | 0.182   | 0.462   | -0.280    | 0.006            | NA                    | Hypomethylated in FP vs FN |
| cg22371972 | 0.102   | 0.356   | -0.255    | 0.006            | NA                    | Hypomethylated in FP vs FN |

### Supplementary Table 7 (continued)

| Probe      | FP.mean | FN.mean | Mean.diff | Adjusted.P.value | Promoter.related.gene | Category                   |
|------------|---------|---------|-----------|------------------|-----------------------|----------------------------|
| cg02447304 | 0.376   | 0.666   | -0.290    | 0.006            | NA                    | Hypomethylated in FP vs FN |
| cg22718636 | 0.294   | 0.578   | -0.284    | 0.006            | NA                    | Hypomethylated in FP vs FN |
| cg02940714 | 0.472   | 0.722   | -0.250    | 0.006            | NA                    | Hypomethylated in FP vs FN |
| cg08604097 | 0.279   | 0.552   | -0.273    | 0.006            | NA                    | Hypomethylated in FP vs FN |
| cg00553149 | 0.348   | 0.601   | -0.253    | 0.006            | STAG3_GPC2            | Hypomethylated in FP vs FN |
| cg23452969 | 0.156   | 0.434   | -0.279    | 0.006            | NA                    | Hypomethylated in FP vs FN |
| cg02353165 | 0.155   | 0.416   | -0.262    | 0.006            | GNMT                  | Hypomethylated in FP vs FN |
| cg23763647 | 0.142   | 0.426   | -0.284    | 0.006            | NA                    | Hypomethylated in FP vs FN |
| cg25062797 | 0.304   | 0.557   | -0.252    | 0.006            | NA                    | Hypomethylated in FP vs FN |
| cg00063174 | 0.122   | 0.390   | -0.268    | 0.006            | WDR69                 | Hypomethylated in FP vs FN |
| cg24034005 | 0.144   | 0.440   | -0.296    | 0.006            | NA                    | Hypomethylated in FP vs FN |
| cg14314029 | 0.189   | 0.455   | -0.265    | 0.006            | NA                    | Hypomethylated in FP vs FN |
| cg12630461 | 0.168   | 0.493   | -0.325    | 0.006            | NA                    | Hypomethylated in FP vs FN |
| cg09570682 | 0.272   | 0.536   | -0.264    | 0.006            | NA                    | Hypomethylated in FP vs FN |
| cg02328545 | 0.371   | 0.622   | -0.251    | 0.006            | NA                    | Hypomethylated in FP vs FN |
| cg19047707 | 0.181   | 0.440   | -0.259    | 0.006            | NA                    | Hypomethylated in FP vs FN |
| cg10135483 | 0.170   | 0.464   | -0.294    | 0.006            | HTR1E                 | Hypomethylated in FP vs FN |
| cg10742917 | 0.273   | 0.564   | -0.291    | 0.006            | NA                    | Hypomethylated in FP vs FN |
| cg03890037 | 0.366   | 0.628   | -0.262    | 0.006            | LVRN                  | Hypomethylated in FP vs FN |
| cg13356896 | 0.244   | 0.529   | -0.285    | 0.006            | BOLL                  | Hypomethylated in FP vs FN |
| cg19718882 | 0.365   | 0.626   | -0.261    | 0.006            | NA                    | Hypomethylated in FP vs FN |
| cg18905461 | 0.327   | 0.593   | -0.266    | 0.006            | NA                    | Hypomethylated in FP vs FN |
| cg03669782 | 0.325   | 0.585   | -0.260    | 0.006            | NA                    | Hypomethylated in FP vs FN |
| cg24740026 | 0.286   | 0.605   | -0.319    | 0.006            | NA                    | Hypomethylated in FP vs FN |
| cg00918181 | 0.373   | 0.635   | -0.262    | 0.006            | NA                    | Hypomethylated in FP vs FN |

### Supplementary Table 7 (continued)

| Probe      | FP.mean | FN.mean | Mean.diff | Adjusted.P.value | Promoter.related.gene | Category                   |
|------------|---------|---------|-----------|------------------|-----------------------|----------------------------|
| cg24245418 | 0.292   | 0.605   | -0.314    | 0.006            | NA                    | Hypomethylated in FP vs FN |
| cg01837362 | 0.248   | 0.510   | -0.261    | 0.007            | NA                    | Hypomethylated in FP vs FN |
| cg05221167 | 0.343   | 0.596   | -0.252    | 0.007            | ZNF560                | Hypomethylated in FP vs FN |
| cg18846140 | 0.158   | 0.409   | -0.251    | 0.007            | HSPA1A_HSPA1L         | Hypomethylated in FP vs FN |
| cg05033333 | 0.138   | 0.391   | -0.254    | 0.007            | NA                    | Hypomethylated in FP vs FN |
| cg04552470 | 0.106   | 0.377   | -0.271    | 0.007            | NA                    | Hypomethylated in FP vs FN |
| cg05918002 | 0.345   | 0.600   | -0.255    | 0.007            | NA                    | Hypomethylated in FP vs FN |
| cg10068989 | 0.223   | 0.511   | -0.288    | 0.007            | NA                    | Hypomethylated in FP vs FN |
| cg18674643 | 0.325   | 0.595   | -0.269    | 0.007            | NA                    | Hypomethylated in FP vs FN |
| cg03014326 | 0.313   | 0.564   | -0.251    | 0.007            | ANKRD30B              | Hypomethylated in FP vs FN |
| cg03126579 | 0.270   | 0.577   | -0.308    | 0.007            | NA                    | Hypomethylated in FP vs FN |
| cg07673866 | 0.263   | 0.550   | -0.287    | 0.007            | KIF11                 | Hypomethylated in FP vs FN |
| cg03337057 | 0.277   | 0.540   | -0.263    | 0.007            | NA                    | Hypomethylated in FP vs FN |
| cg14861089 | 0.475   | 0.730   | -0.255    | 0.007            | NA                    | Hypomethylated in FP vs FN |
| cg18495682 | 0.175   | 0.434   | -0.259    | 0.007            | NA                    | Hypomethylated in FP vs FN |
| cg26674943 | 0.238   | 0.503   | -0.265    | 0.007            | ISL2                  | Hypomethylated in FP vs FN |
| cg17822947 | 0.161   | 0.424   | -0.263    | 0.007            | NA                    | Hypomethylated in FP vs FN |
| cg12708336 | 0.122   | 0.413   | -0.290    | 0.007            | NA                    | Hypomethylated in FP vs FN |
| cg10603004 | 0.233   | 0.490   | -0.257    | 0.007            | NKX2-6                | Hypomethylated in FP vs FN |
| cg14106234 | 0.445   | 0.710   | -0.265    | 0.007            | NA                    | Hypomethylated in FP vs FN |
| cg21845713 | 0.102   | 0.360   | -0.258    | 0.007            | NA                    | Hypomethylated in FP vs FN |
| cg23151000 | 0.208   | 0.465   | -0.258    | 0.007            | NA                    | Hypomethylated in FP vs FN |
| cg19098763 | 0.160   | 0.461   | -0.302    | 0.007            | ELAVL4                | Hypomethylated in FP vs FN |
| cg13062913 | 0.463   | 0.713   | -0.251    | 0.007            | NCAM2                 | Hypomethylated in FP vs FN |
| cg24540521 | 0.131   | 0.406   | -0.274    | 0.007            | THEM4                 | Hypomethylated in FP vs FN |

### Supplementary Table 7 (continued)

| Probe      | FP.mean | FN.mean | Mean.diff | Adjusted.P.value | Promoter.related.gene | Category                   |
|------------|---------|---------|-----------|------------------|-----------------------|----------------------------|
| cg09022993 | 0.334   | 0.614   | -0.280    | 0.007            | SPATA18               | Hypomethylated in FP vs FN |
| cg17064250 | 0.206   | 0.466   | -0.261    | 0.007            | RUNX2                 | Hypomethylated in FP vs FN |
| cg01754756 | 0.243   | 0.500   | -0.257    | 0.007            | C10orf116             | Hypomethylated in FP vs FN |
| cg15449979 | 0.306   | 0.558   | -0.252    | 0.007            | NA                    | Hypomethylated in FP vs FN |
| cg04369291 | 0.134   | 0.393   | -0.259    | 0.007            | NA                    | Hypomethylated in FP vs FN |
| cg24902278 | 0.201   | 0.457   | -0.256    | 0.007            | NA                    | Hypomethylated in FP vs FN |
| cg25988317 | 0.210   | 0.464   | -0.254    | 0.007            | GATA5                 | Hypomethylated in FP vs FN |
| cg19782061 | 0.288   | 0.559   | -0.271    | 0.007            | NA                    | Hypomethylated in FP vs FN |
| cg19254119 | 0.332   | 0.586   | -0.255    | 0.007            | ZNF560                | Hypomethylated in FP vs FN |
| cg09383816 | 0.191   | 0.449   | -0.259    | 0.007            | ADHFE1                | Hypomethylated in FP vs FN |
| cg25681339 | 0.183   | 0.477   | -0.294    | 0.007            | BHLHA9                | Hypomethylated in FP vs FN |
| cg19283840 | 0.157   | 0.409   | -0.251    | 0.007            | ADHFE1                | Hypomethylated in FP vs FN |
| cg00339300 | 0.269   | 0.544   | -0.275    | 0.007            | NA                    | Hypomethylated in FP vs FN |
| cg06908778 | 0.271   | 0.541   | -0.270    | 0.007            | NA                    | Hypomethylated in FP vs FN |
| cg22338127 | 0.175   | 0.449   | -0.275    | 0.007            | IRF6                  | Hypomethylated in FP vs FN |
| cg06518618 | 0.400   | 0.666   | -0.266    | 0.007            | NA                    | Hypomethylated in FP vs FN |
| cg09643340 | 0.241   | 0.496   | -0.255    | 0.007            | NA                    | Hypomethylated in FP vs FN |
| cg14263942 | 0.239   | 0.550   | -0.311    | 0.007            | CDKL2                 | Hypomethylated in FP vs FN |
| cg18379455 | 0.146   | 0.429   | -0.283    | 0.007            | NA                    | Hypomethylated in FP vs FN |
| cg04728482 | 0.195   | 0.483   | -0.288    | 0.007            | NA                    | Hypomethylated in FP vs FN |
| cg21762788 | 0.343   | 0.634   | -0.291    | 0.008            | NA                    | Hypomethylated in FP vs FN |
| cg26202575 | 0.258   | 0.515   | -0.256    | 0.008            | KIF11                 | Hypomethylated in FP vs FN |
| cg17632299 | 0.305   | 0.601   | -0.296    | 0.008            | NA                    | Hypomethylated in FP vs FN |
| cg13181079 | 0.108   | 0.376   | -0.268    | 0.008            | HYLS1                 | Hypomethylated in FP vs FN |
| cg22817352 | 0.243   | 0.517   | -0.275    | 0.008            | NA                    | Hypomethylated in FP vs FN |

### Supplementary Table 7 (continued)

| Probe      | FP.mean | FN.mean | Mean.diff | Adjusted.P.value | Promoter.related.gene | Category                   |
|------------|---------|---------|-----------|------------------|-----------------------|----------------------------|
| cg14988503 | 0.249   | 0.524   | -0.276    | 0.008            | CDKL2                 | Hypomethylated in FP vs FN |
| cg26005766 | 0.407   | 0.694   | -0.286    | 0.008            | TPD52L1               | Hypomethylated in FP vs FN |
| cg03147210 | 0.112   | 0.379   | -0.266    | 0.008            | THEM4                 | Hypomethylated in FP vs FN |
| cg09789636 | 0.230   | 0.493   | -0.264    | 0.008            | NA                    | Hypomethylated in FP vs FN |
| cg13128596 | 0.354   | 0.609   | -0.255    | 0.008            | CASP4                 | Hypomethylated in FP vs FN |
| cg20925841 | 0.088   | 0.344   | -0.256    | 0.008            | NA                    | Hypomethylated in FP vs FN |
| cg15060012 | 0.239   | 0.499   | -0.260    | 0.008            | ZNF418                | Hypomethylated in FP vs FN |
| cg15690342 | 0.175   | 0.442   | -0.267    | 0.008            | NA                    | Hypomethylated in FP vs FN |
| cg04617936 | 0.442   | 0.717   | -0.275    | 0.008            | NA                    | Hypomethylated in FP vs FN |
| cg01588438 | 0.237   | 0.504   | -0.267    | 0.008            | ADHFE1                | Hypomethylated in FP vs FN |
| cg25308427 | 0.097   | 0.356   | -0.259    | 0.008            | NA                    | Hypomethylated in FP vs FN |
| cg14236976 | 0.280   | 0.547   | -0.267    | 0.008            | NA                    | Hypomethylated in FP vs FN |
| cg04407470 | 0.118   | 0.423   | -0.305    | 0.008            | NA                    | Hypomethylated in FP vs FN |
| cg26452056 | 0.389   | 0.684   | -0.296    | 0.008            | NA                    | Hypomethylated in FP vs FN |
| cg27458265 | 0.243   | 0.512   | -0.270    | 0.008            | LPCAT2                | Hypomethylated in FP vs FN |
| cg10084644 | 0.320   | 0.580   | -0.259    | 0.008            | STAG3_GPC2            | Hypomethylated in FP vs FN |
| cg27628340 | 0.401   | 0.655   | -0.254    | 0.008            | NA                    | Hypomethylated in FP vs FN |
| cg07825347 | 0.332   | 0.608   | -0.276    | 0.008            | NA                    | Hypomethylated in FP vs FN |
| cg07054208 | 0.312   | 0.565   | -0.254    | 0.008            | DCDC2                 | Hypomethylated in FP vs FN |
| cg04557452 | 0.075   | 0.326   | -0.251    | 0.008            | NA                    | Hypomethylated in FP vs FN |
| cg03597976 | 0.197   | 0.483   | -0.286    | 0.009            | NA                    | Hypomethylated in FP vs FN |
| cg10344081 | 0.268   | 0.567   | -0.299    | 0.009            | CDKL2                 | Hypomethylated in FP vs FN |
| cg22534145 | 0.134   | 0.401   | -0.267    | 0.009            | SSTR4                 | Hypomethylated in FP vs FN |
| cg18059088 | 0.262   | 0.519   | -0.257    | 0.009            | HS3ST1                | Hypomethylated in FP vs FN |
| cg24864161 | 0.283   | 0.556   | -0.273    | 0.009            | MOV10L1               | Hypomethylated in FP vs FN |

### Supplementary Table 7 (continued)

| Probe      | FP.mean | FN.mean | Mean.diff | Adjusted.P.value | Promoter.related.gene | Category                   |
|------------|---------|---------|-----------|------------------|-----------------------|----------------------------|
| cg05184311 | 0.434   | 0.697   | -0.263    | 0.009            | NA                    | Hypomethylated in FP vs FN |
| cg01446907 | 0.351   | 0.606   | -0.255    | 0.009            | NA                    | Hypomethylated in FP vs FN |
| cg08307030 | 0.283   | 0.540   | -0.257    | 0.009            | NA                    | Hypomethylated in FP vs FN |
| cg13578160 | 0.361   | 0.617   | -0.255    | 0.009            | NA                    | Hypomethylated in FP vs FN |
| cg09943716 | 0.135   | 0.388   | -0.253    | 0.009            | NA                    | Hypomethylated in FP vs FN |
| cg20295442 | 0.172   | 0.458   | -0.287    | 0.009            | ADHFE1                | Hypomethylated in FP vs FN |
| cg07792478 | 0.274   | 0.542   | -0.267    | 0.009            | MIR124-2              | Hypomethylated in FP vs FN |
| cg12741994 | 0.282   | 0.548   | -0.266    | 0.009            | NA                    | Hypomethylated in FP vs FN |
| cg23771603 | 0.213   | 0.489   | -0.276    | 0.009            | NA                    | Hypomethylated in FP vs FN |
| cg00169617 | 0.196   | 0.476   | -0.280    | 0.009            | NA                    | Hypomethylated in FP vs FN |
| cg26679004 | 0.425   | 0.682   | -0.257    | 0.009            | NA                    | Hypomethylated in FP vs FN |
| cg13519035 | 0.282   | 0.533   | -0.250    | 0.009            | NA                    | Hypomethylated in FP vs FN |
| cg18644703 | 0.196   | 0.479   | -0.284    | 0.009            | NA                    | Hypomethylated in FP vs FN |
| cg14285533 | 0.366   | 0.641   | -0.274    | 0.009            | NA                    | Hypomethylated in FP vs FN |
| cg14433497 | 0.219   | 0.478   | -0.259    | 0.009            | NA                    | Hypomethylated in FP vs FN |
| cg01698167 | 0.108   | 0.378   | -0.271    | 0.009            | HS3ST1                | Hypomethylated in FP vs FN |
| cg17012575 | 0.103   | 0.383   | -0.281    | 0.009            | HYLS1                 | Hypomethylated in FP vs FN |
| cg14696334 | 0.293   | 0.593   | -0.300    | 0.010            | NA                    | Hypomethylated in FP vs FN |
| cg17898329 | 0.191   | 0.493   | -0.303    | 0.010            | NA                    | Hypomethylated in FP vs FN |
| cg19909865 | 0.297   | 0.548   | -0.252    | 0.010            | NA                    | Hypomethylated in FP vs FN |
| cg09737314 | 0.410   | 0.664   | -0.255    | 0.010            | ALOX12                | Hypomethylated in FP vs FN |
| cg04812509 | 0.252   | 0.527   | -0.275    | 0.010            | NA                    | Hypomethylated in FP vs FN |
| cg01389445 | 0.178   | 0.432   | -0.254    | 0.010            | LRAT                  | Hypomethylated in FP vs FN |
| cg17560332 | 0.162   | 0.413   | -0.252    | 0.010            | BOLL                  | Hypomethylated in FP vs FN |
| cg01437917 | 0.422   | 0.672   | -0.250    | 0.010            | NA                    | Hypomethylated in FP vs FN |

### Supplementary Table 7 (continued)

| Probe      | FP.mean | FN.mean | Mean.diff | Adjusted.P.value | Promoter.related.gene | Category                   |
|------------|---------|---------|-----------|------------------|-----------------------|----------------------------|
| cg03738352 | 0.285   | 0.567   | -0.282    | 0.01             | SLC34A2               | Hypomethylated in FP vs FN |
| cg11738701 | 0.219   | 0.475   | -0.256    | 0.01             | NA                    | Hypomethylated in FP vs FN |
| cg17805540 | 0.272   | 0.534   | -0.261    | 0.01             | NA                    | Hypomethylated in FP vs FN |
| cg07578695 | 0.272   | 0.528   | -0.256    | 0.01             | SLC34A2               | Hypomethylated in FP vs FN |
| cg07103129 | 0.171   | 0.441   | -0.270    | 0.01             | NA                    | Hypomethylated in FP vs FN |
| cg15413177 | 0.312   | 0.564   | -0.251    | 0.01             | NA                    | Hypomethylated in FP vs FN |
| cg22757391 | 0.413   | 0.667   | -0.254    | 0.01             | NA                    | Hypomethylated in FP vs FN |
| cg20507276 | 0.316   | 0.567   | -0.251    | 0.01             | OR2L13                | Hypomethylated in FP vs FN |
| cg21911021 | 0.403   | 0.657   | -0.254    | 0.01             | ZIK1                  | Hypomethylated in FP vs FN |
| cg03407747 | 0.402   | 0.653   | -0.251    | 0.01             | ALOX12                | Hypomethylated in FP vs FN |
| cg10428345 | 0.392   | 0.644   | -0.252    | 0.01             | NA                    | Hypomethylated in FP vs FN |
| cg18237551 | 0.161   | 0.418   | -0.257    | 0.01             | ZNF300                | Hypomethylated in FP vs FN |
| cg05475524 | 0.232   | 0.487   | -0.255    | 0.01             | NA                    | Hypomethylated in FP vs FN |
| cg15811515 | 0.140   | 0.397   | -0.256    | 0.01             | CSDAP1                | Hypomethylated in FP vs FN |
| cg10695105 | 0.410   | 0.664   | -0.254    | 0.01             | NA                    | Hypomethylated in FP vs FN |
| cg18538958 | 0.183   | 0.456   | -0.273    | 0.01             | TACR3                 | Hypomethylated in FP vs FN |
| cg27140058 | 0.419   | 0.672   | -0.253    | 0.01             | NA                    | Hypomethylated in FP vs FN |
| cg01419831 | 0.241   | 0.541   | -0.300    | 0.01             | NA                    | Hypomethylated in FP vs FN |
| cg04922681 | 0.225   | 0.488   | -0.263    | 0.01             | NA                    | Hypomethylated in FP vs FN |
| cg26885268 | 0.307   | 0.559   | -0.253    | 0.01             | NA                    | Hypomethylated in FP vs FN |
| cg03757145 | 0.281   | 0.547   | -0.267    | 0.01             | CDKL2                 | Hypomethylated in FP vs FN |
| cg06190677 | 0.151   | 0.417   | -0.266    | 0.01             | RPL39L                | Hypomethylated in FP vs FN |
| cg02173289 | 0.393   | 0.644   | -0.252    | 0.01             | NA                    | Hypomethylated in FP vs FN |
| cg11751707 | 0.307   | 0.559   | -0.252    | 0.01             | NA                    | Hypomethylated in FP vs FN |
| cg11150664 | 0.251   | 0.517   | -0.266    | 0.01             | KIF11                 | Hypomethylated in FP vs FN |



### Supplementary Table 7 (continued)

| Probe      | FP.mean | FN.mean | Mean.diff | Adjusted.P.value | Promoter.related.gene | Category                   |
|------------|---------|---------|-----------|------------------|-----------------------|----------------------------|
| cg25547580 | 0.286   | 0.600   | -0.314    | 0.01             | ONECUT2               | Hypomethylated in FP vs FN |
| cg27513574 | 0.298   | 0.583   | -0.285    | 0.01             | SLC34A2               | Hypomethylated in FP vs FN |
| cg01516005 | 0.276   | 0.532   | -0.256    | 0.01             | NA                    | Hypomethylated in FP vs FN |
| cg06496344 | 0.344   | 0.603   | -0.259    | 0.01             | NA                    | Hypomethylated in FP vs FN |
| cg03860256 | 0.376   | 0.640   | -0.264    | 0.01             | MOV10L1               | Hypomethylated in FP vs FN |
| cg13486170 | 0.195   | 0.445   | -0.250    | 0.01             | NA                    | Hypomethylated in FP vs FN |
| cg25494480 | 0.213   | 0.488   | -0.274    | 0.01             | NA                    | Hypomethylated in FP vs FN |
| cg16202331 | 0.342   | 0.599   | -0.257    | 0.01             | NA                    | Hypomethylated in FP vs FN |
| cg19677203 | 0.157   | 0.472   | -0.315    | 0.01             | HSPA1A_HSPA1L         | Hypomethylated in FP vs FN |
| cg13090007 | 0.457   | 0.709   | -0.251    | 0.01             | NA                    | Hypomethylated in FP vs FN |
| cg25789861 | 0.104   | 0.358   | -0.254    | 0.01             | DSC3                  | Hypomethylated in FP vs FN |
| cg10169241 | 0.204   | 0.456   | -0.251    | 0.01             | NA                    | Hypomethylated in FP vs FN |
| cg21195185 | 0.283   | 0.556   | -0.274    | 0.01             | CDKL2                 | Hypomethylated in FP vs FN |
| cg08151857 | 0.058   | 0.310   | -0.251    | 0.01             | HOXB8                 | Hypomethylated in FP vs FN |
| cg12276123 | 0.331   | 0.581   | -0.251    | 0.01             | KCNJ3                 | Hypomethylated in FP vs FN |
| cg20034792 | 0.095   | 0.355   | -0.260    | 0.01             | NA                    | Hypomethylated in FP vs FN |
| cg16404157 | 0.402   | 0.662   | -0.259    | 0.01             | CLEC14A               | Hypomethylated in FP vs FN |
| cg05196969 | 0.240   | 0.511   | -0.271    | 0.01             | NA                    | Hypomethylated in FP vs FN |
| cg26173997 | 0.275   | 0.552   | -0.276    | 0.01             | CDKL2                 | Hypomethylated in FP vs FN |
| cg20678442 | 0.387   | 0.683   | -0.296    | 0.01             | NA                    | Hypomethylated in FP vs FN |
| cg26718878 | 0.188   | 0.439   | -0.252    | 0.01             | NA                    | Hypomethylated in FP vs FN |
| cg00379720 | 0.345   | 0.607   | -0.262    | 0.01             | NA                    | Hypomethylated in FP vs FN |
| cg17446010 | 0.187   | 0.442   | -0.255    | 0.01             | NA                    | Hypomethylated in FP vs FN |
| cg16640855 | 0.230   | 0.497   | -0.267    | 0.01             | NA                    | Hypomethylated in FP vs FN |
| cg05809668 | 0.211   | 0.470   | -0.260    | 0.01             | NA                    | Hypomethylated in FP vs FN |

### Supplementary Table 7 (continued)

| Probe      | FP.mean | FN.mean | Mean.diff | Adjusted.P.value | Promoter.related.gene | Category                   |
|------------|---------|---------|-----------|------------------|-----------------------|----------------------------|
| cg16270222 | 0.205   | 0.476   | -0.271    | 0.02             | NA                    | Hypomethylated in FP vs FN |
| cg03660115 | 0.202   | 0.460   | -0.258    | 0.02             | NA                    | Hypomethylated in FP vs FN |
| cg01639032 | 0.137   | 0.395   | -0.259    | 0.02             | HSPA1A_HSPA1L         | Hypomethylated in FP vs FN |
| cg18065361 | 0.117   | 0.370   | -0.253    | 0.02             | ADHFE1                | Hypomethylated in FP vs FN |
| cg21051519 | 0.157   | 0.426   | -0.269    | 0.02             | PKD2L2                | Hypomethylated in FP vs FN |
| cg25479788 | 0.217   | 0.468   | -0.251    | 0.02             | NA                    | Hypomethylated in FP vs FN |
| cg06335867 | 0.313   | 0.571   | -0.258    | 0.02             | NA                    | Hypomethylated in FP vs FN |
| cg23615741 | 0.426   | 0.682   | -0.257    | 0.02             | NA                    | Hypomethylated in FP vs FN |
| cg24444923 | 0.227   | 0.495   | -0.268    | 0.02             | NA                    | Hypomethylated in FP vs FN |
| cg00332937 | 0.379   | 0.644   | -0.265    | 0.02             | NA                    | Hypomethylated in FP vs FN |
| cg12614105 | 0.260   | 0.522   | -0.263    | 0.02             | NA                    | Hypomethylated in FP vs FN |
| cg00929855 | 0.153   | 0.441   | -0.288    | 0.02             | HSPA1A_HSPA1L         | Hypomethylated in FP vs FN |
| cg25514273 | 0.389   | 0.642   | -0.253    | 0.02             | KLHL1                 | Hypomethylated in FP vs FN |
| cg18074954 | 0.172   | 0.435   | -0.263    | 0.02             | NA                    | Hypomethylated in FP vs FN |
| cg08701134 | 0.405   | 0.658   | -0.253    | 0.02             | NA                    | Hypomethylated in FP vs FN |
| cg24432073 | 0.287   | 0.564   | -0.277    | 0.02             | CDKL2                 | Hypomethylated in FP vs FN |
| cg01963134 | 0.209   | 0.499   | -0.290    | 0.02             | CPNE8                 | Hypomethylated in FP vs FN |
| cg25649641 | 0.197   | 0.467   | -0.270    | 0.02             | NA                    | Hypomethylated in FP vs FN |
| cg25594119 | 0.316   | 0.573   | -0.256    | 0.02             | NA                    | Hypomethylated in FP vs FN |
| cg22847691 | 0.174   | 0.481   | -0.307    | 0.02             | HSPA1A_HSPA1L         | Hypomethylated in FP vs FN |
| cg20540209 | 0.187   | 0.444   | -0.258    | 0.02             | NA                    | Hypomethylated in FP vs FN |
| cg08944400 | 0.239   | 0.507   | -0.269    | 0.02             | NA                    | Hypomethylated in FP vs FN |
| cg10156366 | 0.232   | 0.483   | -0.251    | 0.02             | NA                    | Hypomethylated in FP vs FN |
| cg05057720 | 0.378   | 0.648   | -0.270    | 0.02             | CLEC14A               | Hypomethylated in FP vs FN |
| cg18249634 | 0.215   | 0.468   | -0.253    | 0.02             | NA                    | Hypomethylated in FP vs FN |

### Supplementary Table 7 (continued)

| Probe      | FP.mean | FN.mean | Mean.diff | Adjusted.P.value | Promoter.related.gene | Category                   |
|------------|---------|---------|-----------|------------------|-----------------------|----------------------------|
| cg10330839 | 0.212   | 0.473   | -0.261    | 0.02             | NA                    | Hypomethylated in FP vs FN |
| cg04224064 | 0.336   | 0.596   | -0.260    | 0.02             | NA                    | Hypomethylated in FP vs FN |
| cg05064297 | 0.295   | 0.549   | -0.254    | 0.02             | NA                    | Hypomethylated in FP vs FN |
| cg07533148 | 0.171   | 0.449   | -0.278    | 0.02             | TRIM58                | Hypomethylated in FP vs FN |
| cg27362525 | 0.310   | 0.571   | -0.261    | 0.02             | NA                    | Hypomethylated in FP vs FN |
| cg08944170 | 0.339   | 0.601   | -0.262    | 0.02             | OR2L13                | Hypomethylated in FP vs FN |
| cg19937061 | 0.217   | 0.468   | -0.251    | 0.02             | NA                    | Hypomethylated in FP vs FN |
| cg22442454 | 0.234   | 0.515   | -0.281    | 0.02             | IRF6                  | Hypomethylated in FP vs FN |
| cg20429172 | 0.265   | 0.520   | -0.255    | 0.02             | TRIM58                | Hypomethylated in FP vs FN |
| cg21404045 | 0.358   | 0.609   | -0.251    | 0.03             | NA                    | Hypomethylated in FP vs FN |
| cg14826425 | 0.328   | 0.581   | -0.252    | 0.03             | NA                    | Hypomethylated in FP vs FN |
| cg15132565 | 0.408   | 0.670   | -0.262    | 0.03             | NA                    | Hypomethylated in FP vs FN |
| cg15006175 | 0.358   | 0.611   | -0.253    | 0.03             | NA                    | Hypomethylated in FP vs FN |
| cg12877723 | 0.102   | 0.361   | -0.259    | 0.03             | NA                    | Hypomethylated in FP vs FN |
| cg13509195 | 0.168   | 0.437   | -0.270    | 0.04             | CPNE8                 | Hypomethylated in FP vs FN |
| cg03738025 | 0.278   | 0.535   | -0.257    | 0.04             | NA                    | Hypomethylated in FP vs FN |
| cg08441170 | 0.204   | 0.467   | -0.263    | 0.04             | MYO3A                 | Hypomethylated in FP vs FN |
| cg26680520 | 0.227   | 0.487   | -0.260    | 0.04             | NA                    | Hypomethylated in FP vs FN |
| cg18147485 | 0.191   | 0.468   | -0.277    | 0.04             | KCNV1                 | Hypomethylated in FP vs FN |
