# Supplementary material
Source: PubMed Central journal article supplement (PMC7415348)
Supplement: NIHMS1610503-supplement-Supplementary_Table_8.pdf [file NIHMS1610503-supplement-Supplementary_Table_8.pdf]

**Supplementary Table 8. Distribution of differentially methylated probes according to genomic features**

|                                         | <b>Number of probes (%)</b> | <b>Enrichment (95% CI)</b> | <b>P value</b> |
|-----------------------------------------|-----------------------------|----------------------------|----------------|
| <b>Differentially methylated probes</b> |                             |                            |                |
| Promoter                                | 2986 (2.08)                 | 0.55 (0.52 - 0.57)         | 1.04E-193      |
| Body                                    | 5168 (3.24)                 | 1.06 (1.02-1.10)           | 0.002          |
| 3'UTR                                   | 374 (2.6)                   | 0.82 (0.74-0.91)           | 0.0002         |
| Intergenic                              | 4115 (4.65)                 | 1.76 (1.70-1.84)           | 3.96E-175      |
| Overall                                 | 12269 (3.13)                | —                          | —              |
| <b>Hypermethylated probes</b>           |                             |                            |                |
| Promoter                                | 1044 (0.73)                 | 0.48 (0.45-0.51)           | 9.16E-107      |
| Body                                    | 2238 (1.4)                  | 1.30(1.23-1.38)            | 3.33E-19       |
| 3'UTR                                   | 204 (1.42)                  | 1.18 (1.02-1.36)           | 0.022          |
| Intergenic                              | 1465 (1.66)                 | 1.54 (1.45-1.64)           | 4.19E-40       |
| Overall                                 | 4747 (1.21)                 | —                          | —              |
| <b>Hypomethylated probes</b>            |                             |                            |                |
| Promoter                                | 1942 (1.75)                 | 0.60 (0.56-0.63)           | 4.21E-91       |
| Body                                    | 2930 (1.83)                 | 0.93 (0.88-0.97)           | 0.001          |
| 3'UTR                                   | 170 (1.18)                  | 0.60 (0.51-0.70)           | 2.76E-12       |
| Intergenic                              | 2650 (3.0)                  | 1.89 (1.80-1.99)           | 6.59E-155      |
| Overall                                 | 7522(1.92)                  | —                          | —              |
