# Supplementary material
Source: PubMed Central journal article supplement (PMC7415348)
Supplement: NIHMS1610503-supplement-Supplementary_Table_9.pdf [file NIHMS1610503-supplement-Supplementary_Table_9.pdf]

**Supplementary Table 9. Distribution of PAX3-FOXO1 binding sites between genes with and without differential methylation in the promoter region**

|                                               | Differentially methylated |                  |                 | Not Differentially methylated |
|-----------------------------------------------|---------------------------|------------------|-----------------|-------------------------------|
|                                               | All                       | Hypermethylation | Hypomethylation |                               |
| <b>Genes with PAX3-FOXO1 binding sites</b>    | 105 (7.8%) <sup>a</sup>   | 45 (10.1%)       | 60 (6.7%)       | 893 (4.9%)                    |
| <b>Genes without PAX3-FOXO1 binding sites</b> | 1234 (92.2%)              | 401 (89.9%)      | 833 (93.3%)     | 17162 (95.1%)                 |
|                                               | P<0.01 <sup>b</sup>       | P<0.01           | P<0.05          |                               |

<sup>a</sup>Percentage in the bracket represents the fraction of the total number within the column.

<sup>b</sup>Fisher's exact test was performed by using non-differentially methylated genes as reference group.
