# Supplementary material
Source: PubMed Central journal article supplement (PMC7415348)
Supplement: NIHMS1610503-supplement-Supplementary_Table_10.pdf [file NIHMS1610503-supplement-Supplementary_Table_10.pdf]

**Supplementary Table 10. Differentially expressed genes in FP versus FN tumors**

| <b>Symbol</b> | <b>Log2.Fold.Change</b> | <b>Log2.AveExpr</b> | <b>Adjusted.P.value</b> | <b>Category</b>               |
|---------------|-------------------------|---------------------|-------------------------|-------------------------------|
| PRDM12        | 11.812                  | 0.634               | 0                       | Overexpressed in FP versus FN |
| PIPOX         | 6.668                   | 4.609               | 0                       | Overexpressed in FP versus FN |
| NOS1          | 10.774                  | 2.393               | 0                       | Overexpressed in FP versus FN |
| CCDC154       | 5.920                   | 4.103               | 0                       | Overexpressed in FP versus FN |
| NRN1          | 3.706                   | 5.366               | 0                       | Overexpressed in FP versus FN |
| QDPR          | 2.397                   | 5.642               | 0                       | Overexpressed in FP versus FN |
| XRN1          | 2.391                   | 6.714               | 0                       | Overexpressed in FP versus FN |
| CDH3          | 4.552                   | 4.564               | 0                       | Overexpressed in FP versus FN |
| LRRC10B       | 5.879                   | 2.490               | 0                       | Overexpressed in FP versus FN |
| ADRA2C        | 4.757                   | 4.325               | 0                       | Overexpressed in FP versus FN |
| GATA4         | 8.007                   | 0.667               | 0                       | Overexpressed in FP versus FN |
| ASS1          | 5.379                   | 6.431               | 0                       | Overexpressed in FP versus FN |
| KCNJ5         | 4.497                   | 3.137               | 0                       | Overexpressed in FP versus FN |
| PITPNM3       | 4.456                   | 6.494               | 0                       | Overexpressed in FP versus FN |
| MYO1E         | 1.913                   | 5.670               | 0                       | Overexpressed in FP versus FN |
| ANKS6         | 2.020                   | 6.598               | 0                       | Overexpressed in FP versus FN |
| KIAA1614      | 2.886                   | 5.501               | 0                       | Overexpressed in FP versus FN |
| SLC25A29      | 2.639                   | 6.755               | 0                       | Overexpressed in FP versus FN |
| B3GAT1        | 7.261                   | 2.177               | 0                       | Overexpressed in FP versus FN |
| CASP9         | 1.849                   | 5.521               | 0                       | Overexpressed in FP versus FN |
| CNR1          | 8.681                   | 3.385               | 0                       | Overexpressed in FP versus FN |
| LOC100289137  | 5.183                   | 3.997               | 0                       | Overexpressed in FP versus FN |
| LPAR2         | 2.264                   | 5.719               | 0                       | Overexpressed in FP versus FN |
| WSCD1         | 2.823                   | 7.689               | 0                       | Overexpressed in FP versus FN |
| NHLH1         | 4.457                   | 3.127               | 0                       | Overexpressed in FP versus FN |

## Supplementary Table 10 (continued)

| Symbol    | Log2.Fold.Change | Log2.AveExpr | Adjusted.P.value | Category                      |
|-----------|------------------|--------------|------------------|-------------------------------|
| TMEM201   | 1.842            | 6.497        | 0                | Overexpressed in FP versus FN |
| FAM201A   | 4.341            | 1.062        | 0                | Overexpressed in FP versus FN |
| OLIG1     | 8.964            | 1.347        | 0                | Overexpressed in FP versus FN |
| TARSL2    | 1.841            | 5.426        | 0                | Overexpressed in FP versus FN |
| ASTN2     | 2.895            | 4.226        | 0                | Overexpressed in FP versus FN |
| DRGX      | 9.034            | -1.758       | 0                | Overexpressed in FP versus FN |
| LOC283177 | 6.122            | -2.946       | 0                | Overexpressed in FP versus FN |
| TFAP2E    | 2.812            | 3.392        | 0                | Overexpressed in FP versus FN |
| PODXL     | 2.165            | 6.798        | 0                | Overexpressed in FP versus FN |
| CELA2A    | 6.158            | 0.742        | 0                | Overexpressed in FP versus FN |
| LRRFIP2   | 1.250            | 6.131        | 0                | Overexpressed in FP versus FN |
| PBX4      | 2.402            | 3.722        | 0                | Overexpressed in FP versus FN |
| SEL1L3    | 1.962            | 6.540        | 0                | Overexpressed in FP versus FN |
| NMRK1     | 2.723            | 4.198        | 0                | Overexpressed in FP versus FN |
| SSTR5     | 4.826            | 2.804        | 0                | Overexpressed in FP versus FN |
| GADD45G   | 2.790            | 5.255        | 0                | Overexpressed in FP versus FN |
| FGF8      | 5.114            | 3.205        | 0                | Overexpressed in FP versus FN |
| SPIN2B    | 1.803            | 2.655        | 0                | Overexpressed in FP versus FN |
| ALK       | 4.678            | 3.701        | 0                | Overexpressed in FP versus FN |
| FOXF1     | 4.924            | 2.950        | 0                | Overexpressed in FP versus FN |
| VIPR2     | 4.382            | 4.904        | 0                | Overexpressed in FP versus FN |
| DLK2      | 3.176            | 3.079        | 0                | Overexpressed in FP versus FN |
| ROGDI     | 1.667            | 4.730        | 0                | Overexpressed in FP versus FN |
| ARMCX6    | 1.168            | 4.269        | 0                | Overexpressed in FP versus FN |
| TSC22D2   | 1.608            | 6.670        | 0                | Overexpressed in FP versus FN |

## Supplementary Table 10 (continued)

| Symbol       | Log2.Fold.Change | Log2.AveExpr | Adjusted.P.value | Category                      |
|--------------|------------------|--------------|------------------|-------------------------------|
| MYLIP        | 1.896            | 6.040        | 0                | Overexpressed in FP versus FN |
| HDAC11       | 1.647            | 5.165        | 0                | Overexpressed in FP versus FN |
| SHB          | 1.387            | 5.379        | 0                | Overexpressed in FP versus FN |
| SORCS1       | 5.813            | 3.411        | 0                | Overexpressed in FP versus FN |
| ZNF57        | 1.827            | 3.985        | 0                | Overexpressed in FP versus FN |
| LOC100133461 | 7.175            | -2.682       | 0                | Overexpressed in FP versus FN |
| CCDC3        | 2.693            | 6.257        | 0                | Overexpressed in FP versus FN |
| CELA2B       | 4.897            | 2.278        | 0                | Overexpressed in FP versus FN |
| NELL1        | 4.620            | 3.994        | 0                | Overexpressed in FP versus FN |
| PRKAG2-AS1   | 3.308            | 1.544        | 0                | Overexpressed in FP versus FN |
| PLEKHG4B     | 4.660            | 4.130        | 0                | Overexpressed in FP versus FN |
| TUBA3FP      | 3.293            | 0.845        | 0                | Overexpressed in FP versus FN |
| SSTR5-AS1    | 4.180            | 1.227        | 0                | Overexpressed in FP versus FN |
| ADAMTS14     | 3.221            | 6.830        | 0                | Overexpressed in FP versus FN |
| FAM89A       | 2.030            | 4.489        | 0                | Overexpressed in FP versus FN |
| LOC643355    | 3.696            | 0.617        | 0                | Overexpressed in FP versus FN |
| SNAI1        | 2.445            | 4.557        | 0                | Overexpressed in FP versus FN |
| C16orf45     | 2.098            | 5.766        | 0                | Overexpressed in FP versus FN |
| PPM1H        | 2.897            | 4.273        | 0                | Overexpressed in FP versus FN |
| BAIAP2L1     | 3.059            | 4.488        | 0                | Overexpressed in FP versus FN |
| ARRB1        | 2.528            | 6.227        | 0                | Overexpressed in FP versus FN |
| OLIG2        | 9.376            | 0.305        | 0                | Overexpressed in FP versus FN |
| SGMS1        | 1.929            | 4.629        | 0                | Overexpressed in FP versus FN |
| BRSK2        | 5.166            | 3.077        | 0                | Overexpressed in FP versus FN |
| NRCAM        | 3.197            | 5.124        | 0                | Overexpressed in FP versus FN |

## Supplementary Table 10 (continued)

| Symbol    | Log2.Fold.Change | Log2.AveExpr | Adjusted.P.value | Category                      |
|-----------|------------------|--------------|------------------|-------------------------------|
| DNASE1L1  | 1.560            | 4.154        | 0                | Overexpressed in FP versus FN |
| QSOX2     | 1.630            | 6.323        | 0                | Overexpressed in FP versus FN |
| C14orf101 | 1.269            | 5.302        | 0                | Overexpressed in FP versus FN |
| P2RX6     | 3.530            | 4.139        | 0                | Overexpressed in FP versus FN |
| CABLES1   | 2.242            | 5.552        | 0                | Overexpressed in FP versus FN |
| FRMPD1    | 1.679            | 6.075        | 0                | Overexpressed in FP versus FN |
| FGFR2     | 4.877            | 3.410        | 0                | Overexpressed in FP versus FN |
| ABAT      | 2.649            | 7.410        | 0                | Overexpressed in FP versus FN |
| ARHGEF4   | 3.857            | 4.095        | 0                | Overexpressed in FP versus FN |
| TRPV1     | 1.779            | 5.541        | 0                | Overexpressed in FP versus FN |
| NKX6-2    | 5.528            | -1.966       | 0                | Overexpressed in FP versus FN |
| LOC400548 | 3.174            | 2.405        | 0                | Overexpressed in FP versus FN |
| ACOT9     | 1.347            | 5.220        | 0                | Overexpressed in FP versus FN |
| CYB561    | 2.129            | 4.580        | 0                | Overexpressed in FP versus FN |
| MYCN      | 2.452            | 6.300        | 0                | Overexpressed in FP versus FN |
| DAPK1     | 1.798            | 6.986        | 0                | Overexpressed in FP versus FN |
| CCDC40    | 2.121            | 4.635        | 0                | Overexpressed in FP versus FN |
| MAP6      | 3.838            | 4.059        | 0                | Overexpressed in FP versus FN |
| ELMO1     | 1.683            | 6.218        | 0                | Overexpressed in FP versus FN |
| RAPGEF1   | 1.321            | 7.300        | 0                | Overexpressed in FP versus FN |
| MLYCD     | 1.474            | 4.081        | 0                | Overexpressed in FP versus FN |
| SLC16A10  | 2.524            | 3.137        | 0                | Overexpressed in FP versus FN |
| GMIP      | 1.781            | 5.013        | 0                | Overexpressed in FP versus FN |
| MYO18A    | 1.445            | 6.877        | 0                | Overexpressed in FP versus FN |
| IRX1      | 6.222            | 0.792        | 0                | Overexpressed in FP versus FN |

## Supplementary Table 10 (continued)

| Symbol   | Log2.Fold.Change | Log2.AveExpr | Adjusted.P.value | Category                      |
|----------|------------------|--------------|------------------|-------------------------------|
| DTWD1    | 1.179            | 4.632        | 0                | Overexpressed in FP versus FN |
| ARHGAP26 | 2.371            | 5.905        | 0                | Overexpressed in FP versus FN |
| SARDH    | 2.053            | 4.385        | 0                | Overexpressed in FP versus FN |
| TMEM132D | 3.681            | 3.645        | 0                | Overexpressed in FP versus FN |
| MIMT1    | 2.208            | 2.585        | 0                | Overexpressed in FP versus FN |
| CILP2    | 3.052            | 4.380        | 0                | Overexpressed in FP versus FN |
| TOX3     | 4.447            | 2.912        | 0                | Overexpressed in FP versus FN |
| KCNN3    | 1.803            | 6.146        | 0                | Overexpressed in FP versus FN |
| DIXDC1   | 1.719            | 5.831        | 0                | Overexpressed in FP versus FN |
| GMPR     | 2.383            | 4.007        | 0                | Overexpressed in FP versus FN |
| SSH2     | 1.213            | 6.102        | 0                | Overexpressed in FP versus FN |
| PITRM1   | 1.342            | 6.357        | 0                | Overexpressed in FP versus FN |
| NKAIN1   | 2.859            | 4.825        | 0                | Overexpressed in FP versus FN |
| CPA5     | 5.026            | 3.817        | 0                | Overexpressed in FP versus FN |
| FAN1     | 1.025            | 5.760        | 0                | Overexpressed in FP versus FN |
| SYN2     | 3.733            | 3.785        | 0                | Overexpressed in FP versus FN |
| FAM108B1 | 1.523            | 5.223        | 0                | Overexpressed in FP versus FN |
| ANKRD18A | 4.108            | 2.259        | 0                | Overexpressed in FP versus FN |
| SLC25A34 | 2.084            | 4.114        | 0                | Overexpressed in FP versus FN |
| PCSK6    | 2.310            | 4.639        | 0                | Overexpressed in FP versus FN |
| ENGASE   | 1.532            | 6.277        | 0                | Overexpressed in FP versus FN |
| ALAD     | 1.255            | 5.771        | 0                | Overexpressed in FP versus FN |
| CRMP1    | 2.678            | 6.648        | 0                | Overexpressed in FP versus FN |
| EEF2K    | 1.112            | 6.156        | 0                | Overexpressed in FP versus FN |
| PKN3     | 1.584            | 5.243        | 0                | Overexpressed in FP versus FN |

## Supplementary Table 10 (continued)

| Symbol   | Log2.Fold.Change | Log2.AveExpr | Adjusted.P.value | Category                      |
|----------|------------------|--------------|------------------|-------------------------------|
| C12orf76 | 1.197            | 4.153        | 0                | Overexpressed in FP versus FN |
| FITM1    | 2.198            | 6.418        | 0                | Overexpressed in FP versus FN |
| ARHGAP25 | 2.590            | 4.705        | 0                | Overexpressed in FP versus FN |
| PBK      | 1.683            | 5.160        | 0                | Overexpressed in FP versus FN |
| TRIB3    | 2.365            | 3.731        | 0                | Overexpressed in FP versus FN |
| MCHR1    | 4.293            | 2.274        | 0                | Overexpressed in FP versus FN |
| POR      | 1.368            | 7.009        | 0                | Overexpressed in FP versus FN |
| C10orf71 | 2.583            | 3.928        | 0                | Overexpressed in FP versus FN |
| NUDT11   | 2.456            | 4.561        | 0                | Overexpressed in FP versus FN |
| FOXD4    | 2.339            | 1.370        | 0                | Overexpressed in FP versus FN |
| RASL10A  | 2.475            | 3.137        | 0                | Overexpressed in FP versus FN |
| KCNIP4   | 3.145            | 2.551        | 0                | Overexpressed in FP versus FN |
| KLHL29   | 1.454            | 6.141        | 0                | Overexpressed in FP versus FN |
| MFSD10   | 1.380            | 6.572        | 0                | Overexpressed in FP versus FN |
| EMC9     | 1.361            | 5.234        | 0                | Overexpressed in FP versus FN |
| EDN3     | 3.472            | 5.703        | 0                | Overexpressed in FP versus FN |
| ARL3     | 1.387            | 5.512        | 0                | Overexpressed in FP versus FN |
| SLC24A3  | 1.547            | 5.681        | 0                | Overexpressed in FP versus FN |
| ACYP1    | 1.187            | 4.150        | 0                | Overexpressed in FP versus FN |
| GREM1    | 6.557            | 2.536        | 0                | Overexpressed in FP versus FN |
| ZNF491   | 1.982            | 3.243        | 0                | Overexpressed in FP versus FN |
| DBC1     | 4.667            | 0.836        | 0                | Overexpressed in FP versus FN |
| C11orf45 | 1.886            | 2.440        | 0                | Overexpressed in FP versus FN |
| JARID2   | 1.068            | 6.369        | 0                | Overexpressed in FP versus FN |
| JAKMIP3  | 3.015            | 1.375        | 0                | Overexpressed in FP versus FN |

## Supplementary Table 10 (continued)

| Symbol     | Log2.Fold.Change | Log2.AveExpr | Adjusted.P.value | Category                      |
|------------|------------------|--------------|------------------|-------------------------------|
| TMEM120A   | 1.414            | 5.652        | 0                | Overexpressed in FP versus FN |
| SH2D5      | 4.376            | 3.722        | 0                | Overexpressed in FP versus FN |
| BNIP3      | 2.011            | 5.567        | 0                | Overexpressed in FP versus FN |
| MEOX1      | 2.382            | 4.605        | 0                | Overexpressed in FP versus FN |
| THAP7-AS1  | 2.106            | 2.560        | 0                | Overexpressed in FP versus FN |
| ERRFI1     | 2.072            | 6.225        | 0                | Overexpressed in FP versus FN |
| SCN4A      | 3.212            | 5.363        | 0                | Overexpressed in FP versus FN |
| DLGAP1-AS1 | 1.658            | 4.015        | 0                | Overexpressed in FP versus FN |
| HDAC5      | 1.500            | 7.168        | 0                | Overexpressed in FP versus FN |
| JAKMIP2    | 3.085            | 4.555        | 0                | Overexpressed in FP versus FN |
| BCAM       | 1.955            | 7.254        | 0                | Overexpressed in FP versus FN |
| MEDAG      | 3.086            | 4.836        | 0                | Overexpressed in FP versus FN |
| FBXO10     | 1.157            | 6.549        | 0                | Overexpressed in FP versus FN |
| NRTN       | 4.071            | 2.535        | 0                | Overexpressed in FP versus FN |
| DAPL1      | 6.565            | -1.303       | 0                | Overexpressed in FP versus FN |
| LTK        | 2.690            | 4.072        | 0                | Overexpressed in FP versus FN |
| FGFR3      | 3.838            | 3.617        | 0                | Overexpressed in FP versus FN |
| C22orf31   | 2.347            | 1.515        | 0                | Overexpressed in FP versus FN |
| ELOVL2     | 3.145            | 3.800        | 0                | Overexpressed in FP versus FN |
| CHRNA6     | 4.840            | -1.727       | 0                | Overexpressed in FP versus FN |
| NTN5       | 5.820            | 3.257        | 0                | Overexpressed in FP versus FN |
| PGBD5      | 1.737            | 6.597        | 0                | Overexpressed in FP versus FN |
| FAM81A     | 4.863            | 1.059        | 0                | Overexpressed in FP versus FN |
| MGC15885   | 2.928            | 0.086        | 0                | Overexpressed in FP versus FN |
| KIAA0556   | 1.049            | 5.333        | 0                | Overexpressed in FP versus FN |

### Supplementary Table 10 (continued)

| Symbol        | Log2.Fold.Change | Log2.AveExpr | Adjusted.P.value | Category                      |
|---------------|------------------|--------------|------------------|-------------------------------|
| DUSP26        | 3.175            | 3.833        | 0                | Overexpressed in FP versus FN |
| TSPYL6        | 5.151            | -0.979       | 0                | Overexpressed in FP versus FN |
| LINC00588     | 4.789            | 1.702        | 0                | Overexpressed in FP versus FN |
| ANKRD34B      | 6.819            | -0.819       | 0                | Overexpressed in FP versus FN |
| TLE1          | 1.618            | 5.325        | 0                | Overexpressed in FP versus FN |
| ITPKB         | 1.280            | 5.911        | 0                | Overexpressed in FP versus FN |
| FOXD4L6       | 4.440            | -2.600       | 0                | Overexpressed in FP versus FN |
| GADD45A       | 1.653            | 5.460        | 0                | Overexpressed in FP versus FN |
| TIAF1         | 2.109            | 1.940        | 0                | Overexpressed in FP versus FN |
| FPGS          | 1.023            | 5.990        | 0                | Overexpressed in FP versus FN |
| TBCD          | 1.209            | 7.389        | 0                | Overexpressed in FP versus FN |
| KANK1         | 1.594            | 5.472        | 0                | Overexpressed in FP versus FN |
| KCND3         | 3.353            | 1.488        | 0                | Overexpressed in FP versus FN |
| GPRC5A        | 3.217            | 1.511        | 0                | Overexpressed in FP versus FN |
| RBFOX3        | 3.070            | 0.983        | 0                | Overexpressed in FP versus FN |
| LIPG          | 3.383            | 3.817        | 0                | Overexpressed in FP versus FN |
| RASSF10       | 4.717            | 1.714        | 0                | Overexpressed in FP versus FN |
| PTPLA         | 3.404            | 0.534        | 0                | Overexpressed in FP versus FN |
| DLGAP2        | 6.105            | 1.977        | 0                | Overexpressed in FP versus FN |
| LOC440288     | 1.501            | 2.765        | 0                | Overexpressed in FP versus FN |
| ARSF          | 5.478            | -1.361       | 0                | Overexpressed in FP versus FN |
| DNAJB5        | 1.584            | 4.197        | 0                | Overexpressed in FP versus FN |
| WDR34         | 1.410            | 6.138        | 0                | Overexpressed in FP versus FN |
| C20orf166-AS1 | 3.338            | 5.912        | 0                | Overexpressed in FP versus FN |
| RAP1GAP2      | 2.933            | 5.566        | 0                | Overexpressed in FP versus FN |



## Supplementary Table 10 (continued)

| Symbol    | Log2.Fold.Change | Log2.AveExpr | Adjusted.P.value | Category                      |
|-----------|------------------|--------------|------------------|-------------------------------|
| RASSF4    | 2.269            | 8.277        | 0                | Overexpressed in FP versus FN |
| REC8      | 2.515            | 5.390        | 0                | Overexpressed in FP versus FN |
| GLB1L2    | 2.997            | 2.632        | 0                | Overexpressed in FP versus FN |
| ZNF248    | 1.046            | 5.555        | 0                | Overexpressed in FP versus FN |
| PKP1      | 4.977            | 5.057        | 0                | Overexpressed in FP versus FN |
| GJD4      | 3.281            | 1.351        | 0                | Overexpressed in FP versus FN |
| LOC339166 | 3.515            | 2.208        | 0                | Overexpressed in FP versus FN |
| FLVCR2    | 2.471            | 3.614        | 0                | Overexpressed in FP versus FN |
| LOC646278 | 3.413            | -0.872       | 0                | Overexpressed in FP versus FN |
| PCYT2     | 1.439            | 4.492        | 0                | Overexpressed in FP versus FN |
| STK32C    | 2.403            | 5.240        | 0                | Overexpressed in FP versus FN |
| FAM213A   | 1.422            | 6.378        | 0                | Overexpressed in FP versus FN |
| RASD1     | 2.473            | 4.886        | 0                | Overexpressed in FP versus FN |
| ADRA2A    | 2.856            | 3.817        | 0                | Overexpressed in FP versus FN |
| SERPIND1  | 4.650            | -1.274       | 0                | Overexpressed in FP versus FN |
| ACAT1     | 1.100            | 5.872        | 0                | Overexpressed in FP versus FN |
| CNTNAP3   | 3.468            | 0.790        | 0                | Overexpressed in FP versus FN |
| FENDRR    | 6.790            | 0.691        | 0                | Overexpressed in FP versus FN |
| ATP2B2    | 4.319            | 0.610        | 0                | Overexpressed in FP versus FN |
| PRKAG2    | 1.583            | 4.318        | 0                | Overexpressed in FP versus FN |
| RAPH1     | 1.281            | 6.657        | 0                | Overexpressed in FP versus FN |
| GKAP1     | 1.421            | 3.695        | 0                | Overexpressed in FP versus FN |
| VWA5A     | 1.663            | 4.401        | 0                | Overexpressed in FP versus FN |
| SCUBE1    | 3.820            | 2.629        | 0                | Overexpressed in FP versus FN |
| MYCNOS    | 2.281            | 1.893        | 0                | Overexpressed in FP versus FN |

## Supplementary Table 10 (continued)

| Symbol       | Log2.Fold.Change | Log2.AveExpr | Adjusted.P.value | Category                      |
|--------------|------------------|--------------|------------------|-------------------------------|
| ZNF404       | 1.765            | 3.075        | 0                | Overexpressed in FP versus FN |
| LOC286083    | 6.875            | -0.904       | 0                | Overexpressed in FP versus FN |
| LHX1         | 5.468            | 0.092        | 0                | Overexpressed in FP versus FN |
| CPPED1       | 1.588            | 4.331        | 0                | Overexpressed in FP versus FN |
| NEUROD2      | 6.418            | -0.948       | 0                | Overexpressed in FP versus FN |
| COX10        | 1.201            | 4.546        | 0                | Overexpressed in FP versus FN |
| TFAP2B       | 8.854            | 2.739        | 0                | Overexpressed in FP versus FN |
| KIRREL3      | 4.236            | 2.297        | 0                | Overexpressed in FP versus FN |
| FIBCD1       | 5.884            | -0.364       | 0                | Overexpressed in FP versus FN |
| ECHS1        | 1.444            | 6.753        | 0                | Overexpressed in FP versus FN |
| GPR123       | 2.420            | 5.108        | 0                | Overexpressed in FP versus FN |
| NOXO1        | 1.635            | 2.080        | 0                | Overexpressed in FP versus FN |
| LOC100144604 | 2.902            | 3.123        | 0                | Overexpressed in FP versus FN |
| FUT5         | 4.622            | -1.477       | 0                | Overexpressed in FP versus FN |
| RABL6        | 1.165            | 7.326        | 0                | Overexpressed in FP versus FN |
| C20orf194    | 1.100            | 5.727        | 0                | Overexpressed in FP versus FN |
| EXTL1        | 1.445            | 3.939        | 0                | Overexpressed in FP versus FN |
| SIRT4        | 1.167            | 2.300        | 0                | Overexpressed in FP versus FN |
| EPM2A        | 1.049            | 3.337        | 0                | Overexpressed in FP versus FN |
| BDH1         | 1.998            | 3.227        | 0                | Overexpressed in FP versus FN |
| ALG1L9P      | 2.331            | 1.802        | 0                | Overexpressed in FP versus FN |
| PTPRT        | 3.609            | 4.793        | 0                | Overexpressed in FP versus FN |
| KCNIP1       | 3.559            | 3.209        | 0                | Overexpressed in FP versus FN |
| ANKS1B       | 2.930            | 2.164        | 0                | Overexpressed in FP versus FN |
| MYO18B       | 1.999            | 7.121        | 0                | Overexpressed in FP versus FN |

## Supplementary Table 10 (continued)

| Symbol   | Log2.Fold.Change | Log2.AveExpr | Adjusted.P.value | Category                      |
|----------|------------------|--------------|------------------|-------------------------------|
| NEU4     | 3.002            | 4.939        | 0                | Overexpressed in FP versus FN |
| SPATS2L  | 1.406            | 9.038        | 0                | Overexpressed in FP versus FN |
| SAMD4A   | 1.239            | 6.622        | 0                | Overexpressed in FP versus FN |
| C8orf34  | 4.265            | 1.166        | 0                | Overexpressed in FP versus FN |
| WNT5B    | 1.930            | 4.199        | 0                | Overexpressed in FP versus FN |
| IRX3     | 2.048            | 4.315        | 0                | Overexpressed in FP versus FN |
| C3orf70  | 2.012            | 4.527        | 0                | Overexpressed in FP versus FN |
| IGFBPL1  | 1.999            | 3.907        | 0                | Overexpressed in FP versus FN |
| IAH1     | 1.127            | 5.311        | 0                | Overexpressed in FP versus FN |
| SULF2    | 1.418            | 8.251        | 0                | Overexpressed in FP versus FN |
| TFF3     | 4.952            | 2.986        | 0                | Overexpressed in FP versus FN |
| PAX2     | 5.390            | 2.282        | 0                | Overexpressed in FP versus FN |
| IGSF21   | 5.059            | 1.705        | 0                | Overexpressed in FP versus FN |
| MGC21881 | 1.372            | 1.845        | 0                | Overexpressed in FP versus FN |
| C4orf6   | 4.050            | -0.613       | 0                | Overexpressed in FP versus FN |
| RNF150   | 1.961            | 3.868        | 0                | Overexpressed in FP versus FN |
| ABCG1    | 1.616            | 5.227        | 0                | Overexpressed in FP versus FN |
| PDZRN3   | 1.496            | 6.410        | 0                | Overexpressed in FP versus FN |
| GAA      | 1.281            | 6.939        | 0                | Overexpressed in FP versus FN |
| MUSTN1   | 2.126            | 1.475        | 0                | Overexpressed in FP versus FN |
| TBCA     | 1.394            | 6.901        | 0                | Overexpressed in FP versus FN |
| ACO1     | 1.193            | 5.623        | 0                | Overexpressed in FP versus FN |
| PGM5     | 2.141            | 4.952        | 0                | Overexpressed in FP versus FN |
| CHST8    | 4.596            | 3.072        | 0                | Overexpressed in FP versus FN |
| ADAM10   | 1.045            | 6.148        | 0                | Overexpressed in FP versus FN |

## Supplementary Table 10 (continued)

| Symbol   | Log2.Fold.Change | Log2.AveExpr | Adjusted.P.value | Category                      |
|----------|------------------|--------------|------------------|-------------------------------|
| DPCD     | 1.231            | 3.890        | 0                | Overexpressed in FP versus FN |
| SEZ6     | 5.282            | 2.960        | 0                | Overexpressed in FP versus FN |
| SMPDL3A  | 1.501            | 4.655        | 0                | Overexpressed in FP versus FN |
| EXOC3L1  | 2.495            | 4.241        | 0                | Overexpressed in FP versus FN |
| RUNX2    | 2.389            | 4.638        | 0                | Overexpressed in FP versus FN |
| RGS17    | 1.952            | 0.836        | 0                | Overexpressed in FP versus FN |
| ZNF781   | 1.679            | 3.734        | 0                | Overexpressed in FP versus FN |
| MYLK4    | 2.539            | 6.072        | 0                | Overexpressed in FP versus FN |
| ASB2     | 2.689            | 4.181        | 0                | Overexpressed in FP versus FN |
| DNAH17   | 2.003            | 4.833        | 0                | Overexpressed in FP versus FN |
| ITIH4    | 1.990            | 4.682        | 0                | Overexpressed in FP versus FN |
| PLEKHH1  | 2.709            | 3.415        | 0                | Overexpressed in FP versus FN |
| PEX11A   | 1.925            | 2.053        | 0                | Overexpressed in FP versus FN |
| C9orf85  | 1.156            | 3.449        | 0                | Overexpressed in FP versus FN |
| HSPB2    | 2.685            | 5.677        | 0                | Overexpressed in FP versus FN |
| NOL3     | 1.527            | 4.993        | 0                | Overexpressed in FP versus FN |
| CHRN3    | 8.750            | -1.901       | 0                | Overexpressed in FP versus FN |
| POLG2    | 1.064            | 4.656        | 0                | Overexpressed in FP versus FN |
| NPPA     | 3.387            | 1.819        | 0                | Overexpressed in FP versus FN |
| ENO3     | 2.543            | 7.861        | 0                | Overexpressed in FP versus FN |
| FAM189A1 | 3.650            | 2.047        | 0                | Overexpressed in FP versus FN |
| TMEM8C   | 2.402            | 5.655        | 0                | Overexpressed in FP versus FN |
| TSPAN3   | 1.183            | 8.420        | 0                | Overexpressed in FP versus FN |
| DOCK9    | 1.217            | 7.312        | 0                | Overexpressed in FP versus FN |
| COX7A1   | 2.106            | 3.972        | 0                | Overexpressed in FP versus FN |

## Supplementary Table 10 (continued)

| Symbol    | Log2.Fold.Change | Log2.AveExpr | Adjusted.P.value | Category                      |
|-----------|------------------|--------------|------------------|-------------------------------|
| SDK1      | 1.967            | 4.654        | 0                | Overexpressed in FP versus FN |
| TMC2      | 2.900            | -0.261       | 0                | Overexpressed in FP versus FN |
| SH3BGR    | 2.040            | 4.307        | 0                | Overexpressed in FP versus FN |
| FCRLB     | 2.900            | 0.194        | 0                | Overexpressed in FP versus FN |
| DLL1      | 1.669            | 6.042        | 0                | Overexpressed in FP versus FN |
| ENDOG     | 1.541            | 2.507        | 0                | Overexpressed in FP versus FN |
| DDR1      | 1.025            | 7.129        | 0                | Overexpressed in FP versus FN |
| FCRLA     | 6.950            | 1.981        | 0                | Overexpressed in FP versus FN |
| RNF186    | 5.900            | -1.292       | 0                | Overexpressed in FP versus FN |
| EBF4      | 2.472            | 4.268        | 0                | Overexpressed in FP versus FN |
| MAPK4     | 3.670            | 1.751        | 0                | Overexpressed in FP versus FN |
| DHFR      | 1.107            | 5.934        | 0                | Overexpressed in FP versus FN |
| MAMDC4    | 1.130            | 4.867        | 0                | Overexpressed in FP versus FN |
| CCDC140   | 4.029            | -1.767       | 0                | Overexpressed in FP versus FN |
| TRIM67    | 5.566            | 1.333        | 0                | Overexpressed in FP versus FN |
| POPDC3    | 1.553            | 5.517        | 0                | Overexpressed in FP versus FN |
| 3-Mar     | 1.049            | 5.116        | 0                | Overexpressed in FP versus FN |
| ANKS1A    | 1.247            | 6.765        | 0                | Overexpressed in FP versus FN |
| SLC16A2   | 1.058            | 6.029        | 0                | Overexpressed in FP versus FN |
| MAMLD1    | 1.517            | 4.403        | 0                | Overexpressed in FP versus FN |
| JAKMIP1   | 3.225            | 0.254        | 0                | Overexpressed in FP versus FN |
| MAGI1     | 1.143            | 6.233        | 0                | Overexpressed in FP versus FN |
| LOC440896 | 6.918            | 0.423        | 0                | Overexpressed in FP versus FN |
| ACVR1C    | 2.962            | 1.650        | 0                | Overexpressed in FP versus FN |
| MAN1C1    | 1.392            | 5.652        | 0                | Overexpressed in FP versus FN |

## Supplementary Table 10 (continued)

| Symbol       | Log2.Fold.Change | Log2.AveExpr | Adjusted.P.value | Category                      |
|--------------|------------------|--------------|------------------|-------------------------------|
| PSEN2        | 1.563            | 6.327        | 0                | Overexpressed in FP versus FN |
| MPC1         | 1.103            | 5.031        | 0                | Overexpressed in FP versus FN |
| CDK2AP1      | 1.346            | 8.236        | 0                | Overexpressed in FP versus FN |
| LOC100272217 | 1.448            | 1.394        | 0                | Overexpressed in FP versus FN |
| ARHGAP6      | 1.477            | 4.769        | 0                | Overexpressed in FP versus FN |
| NANOS1       | 1.336            | 4.815        | 0                | Overexpressed in FP versus FN |
| FAM222A      | 1.626            | 4.639        | 0                | Overexpressed in FP versus FN |
| KRT80        | 2.380            | 3.315        | 0                | Overexpressed in FP versus FN |
| LOC283683    | 4.339            | -0.487       | 0                | Overexpressed in FP versus FN |
| IGSF5        | 2.054            | 1.396        | 0                | Overexpressed in FP versus FN |
| OSGIN1       | 2.473            | 0.996        | 0                | Overexpressed in FP versus FN |
| TMEM178B     | 3.364            | 3.068        | 0                | Overexpressed in FP versus FN |
| MREG         | 1.326            | 3.636        | 0                | Overexpressed in FP versus FN |
| LMF1         | 1.793            | 8.251        | 0                | Overexpressed in FP versus FN |
| PPAP2A       | 1.227            | 5.351        | 0                | Overexpressed in FP versus FN |
| DOK7         | 1.888            | 5.826        | 0                | Overexpressed in FP versus FN |
| RPL3L        | 4.450            | -0.792       | 0                | Overexpressed in FP versus FN |
| OTX2         | 8.130            | 1.209        | 0                | Overexpressed in FP versus FN |
| TSPAN15      | 1.706            | 5.320        | 0                | Overexpressed in FP versus FN |
| TMEM120B     | 1.067            | 6.252        | 0                | Overexpressed in FP versus FN |
| MTERFD3      | 1.185            | 5.602        | 0                | Overexpressed in FP versus FN |
| TTC39C       | 2.097            | 3.820        | 0                | Overexpressed in FP versus FN |
| BMP5         | 5.466            | 1.690        | 0                | Overexpressed in FP versus FN |
| KIAA0895L    | 1.028            | 6.483        | 0                | Overexpressed in FP versus FN |
| MYB          | 2.061            | 2.332        | 0                | Overexpressed in FP versus FN |

## Supplementary Table 10 (continued)

| Symbol       | Log2.Fold.Change | Log2.AveExpr | Adjusted.P.value | Category                      |
|--------------|------------------|--------------|------------------|-------------------------------|
| TMEM189      | 1.131            | 5.628        | 0                | Overexpressed in FP versus FN |
| SEC1P        | 4.627            | 1.873        | 0                | Overexpressed in FP versus FN |
| MSI2         | 1.031            | 4.681        | 0                | Overexpressed in FP versus FN |
| KSR2         | 2.386            | 1.081        | 0                | Overexpressed in FP versus FN |
| LOC643669    | 3.969            | 3.921        | 0                | Overexpressed in FP versus FN |
| GCAT         | 1.346            | 3.852        | 0                | Overexpressed in FP versus FN |
| MYL2         | 4.504            | -0.439       | 0                | Overexpressed in FP versus FN |
| TEX14        | 2.974            | 3.976        | 0                | Overexpressed in FP versus FN |
| DNMBP        | 1.021            | 5.543        | 0                | Overexpressed in FP versus FN |
| SUPT3H       | 1.495            | 4.235        | 0                | Overexpressed in FP versus FN |
| MPO          | 3.553            | 2.712        | 0                | Overexpressed in FP versus FN |
| DMRTA2       | 5.598            | -0.126       | 0                | Overexpressed in FP versus FN |
| ZNF671       | 1.648            | 3.333        | 0                | Overexpressed in FP versus FN |
| OLFML2B      | 1.590            | 7.589        | 0                | Overexpressed in FP versus FN |
| CDC14B       | 1.398            | 5.061        | 0                | Overexpressed in FP versus FN |
| MRPL41       | 1.370            | 5.104        | 0                | Overexpressed in FP versus FN |
| WVOX         | 1.048            | 3.726        | 0                | Overexpressed in FP versus FN |
| C14orf132    | 2.013            | 5.374        | 0                | Overexpressed in FP versus FN |
| NR0B1        | 6.375            | -0.570       | 0                | Overexpressed in FP versus FN |
| KLF7         | 1.138            | 5.806        | 0                | Overexpressed in FP versus FN |
| FAM227B      | 1.261            | 1.790        | 0                | Overexpressed in FP versus FN |
| LOC100506388 | 1.687            | 1.936        | 0                | Overexpressed in FP versus FN |
| NAT8L        | 2.796            | 2.470        | 0                | Overexpressed in FP versus FN |
| MNX1         | 3.238            | -1.060       | 0                | Overexpressed in FP versus FN |
| RD3          | 4.233            | -0.915       | 0                | Overexpressed in FP versus FN |

## Supplementary Table 10 (continued)

| Symbol    | Log2.Fold.Change | Log2.AveExpr | Adjusted.P.value | Category                      |
|-----------|------------------|--------------|------------------|-------------------------------|
| LINC00689 | 4.185            | 2.378        | 0                | Overexpressed in FP versus FN |
| CHST9     | 3.742            | 0.740        | 0                | Overexpressed in FP versus FN |
| CBLN2     | 4.450            | 0.863        | 0                | Overexpressed in FP versus FN |
| ABCC5     | 1.067            | 7.089        | 0                | Overexpressed in FP versus FN |
| EDN2      | 3.158            | -0.051       | 0                | Overexpressed in FP versus FN |
| ACTA1     | 4.001            | 5.840        | 0                | Overexpressed in FP versus FN |
| ZNF334    | 2.717            | 3.999        | 0                | Overexpressed in FP versus FN |
| CASZ1     | 1.672            | 5.781        | 0                | Overexpressed in FP versus FN |
| MORC4     | 1.095            | 6.639        | 0                | Overexpressed in FP versus FN |
| KANK4     | 2.268            | 6.834        | 0                | Overexpressed in FP versus FN |
| FAM196A   | 2.664            | 2.696        | 0                | Overexpressed in FP versus FN |
| CDHR1     | 3.335            | 1.470        | 0                | Overexpressed in FP versus FN |
| SEMA5A    | 1.941            | 5.322        | 0                | Overexpressed in FP versus FN |
| EFHD2     | 1.356            | 7.469        | 0                | Overexpressed in FP versus FN |
| GRHPR     | 1.020            | 6.301        | 0                | Overexpressed in FP versus FN |
| LOC643837 | 1.267            | 5.237        | 0                | Overexpressed in FP versus FN |
| CACNA2D3  | 2.935            | 3.304        | 0                | Overexpressed in FP versus FN |
| KCNG2     | 2.158            | 1.798        | 0                | Overexpressed in FP versus FN |
| CBFA2T3   | 1.755            | 4.731        | 0                | Overexpressed in FP versus FN |
| OTUD7A    | 1.964            | 0.457        | 0                | Overexpressed in FP versus FN |
| CLGN      | 3.019            | 0.813        | 0                | Overexpressed in FP versus FN |
| PEG3      | 1.619            | 9.097        | 0                | Overexpressed in FP versus FN |
| TPPP3     | 1.961            | 5.840        | 0                | Overexpressed in FP versus FN |
| SYT17     | 1.972            | 3.374        | 0                | Overexpressed in FP versus FN |
| DMRT2     | 2.558            | 4.460        | 0                | Overexpressed in FP versus FN |



## Supplementary Table 10 (continued)

| Symbol   | Log2.Fold.Change | Log2.AveExpr | Adjusted.P.value | Category                      |
|----------|------------------|--------------|------------------|-------------------------------|
| KIF19    | 3.864            | 3.724        | 0                | Overexpressed in FP versus FN |
| SREBF1   | 1.047            | 6.194        | 0                | Overexpressed in FP versus FN |
| ARHGDI3  | 3.394            | 1.497        | 0                | Overexpressed in FP versus FN |
| MIR497HG | 1.917            | 1.472        | 0                | Overexpressed in FP versus FN |
| LAMA1    | 2.544            | 4.718        | 0                | Overexpressed in FP versus FN |
| AATK     | 1.357            | 4.924        | 0                | Overexpressed in FP versus FN |
| MICAL1   | 1.612            | 8.052        | 0                | Overexpressed in FP versus FN |
| NSMCE1   | 1.028            | 5.917        | 0                | Overexpressed in FP versus FN |
| FAM181A  | 3.488            | -1.742       | 0                | Overexpressed in FP versus FN |
| FOXC2    | 2.181            | 1.421        | 0                | Overexpressed in FP versus FN |
| CDC42EP3 | 1.050            | 7.192        | 0                | Overexpressed in FP versus FN |
| DPP6     | 3.836            | 2.788        | 0                | Overexpressed in FP versus FN |
| HOGA1    | 4.216            | -0.324       | 0                | Overexpressed in FP versus FN |
| PAX3     | 4.186            | 1.786        | 0                | Overexpressed in FP versus FN |
| TLX3     | 4.280            | -0.005       | 0                | Overexpressed in FP versus FN |
| GRM3     | 5.335            | -0.715       | 0                | Overexpressed in FP versus FN |
| SLC7A4   | 2.855            | 0.453        | 0                | Overexpressed in FP versus FN |
| NFATC2   | 2.041            | 4.121        | 0                | Overexpressed in FP versus FN |
| IFT140   | 1.204            | 5.116        | 0                | Overexpressed in FP versus FN |
| CRNDE    | 1.244            | 4.214        | 0                | Overexpressed in FP versus FN |
| SYNDIG1  | 2.929            | 2.788        | 0                | Overexpressed in FP versus FN |
| MAP6D1   | 1.805            | 4.770        | 0                | Overexpressed in FP versus FN |
| EPHA8    | 4.689            | 2.310        | 0                | Overexpressed in FP versus FN |
| AGXT     | 4.461            | 2.059        | 0                | Overexpressed in FP versus FN |
| CALCR    | 3.747            | 0.044        | 0                | Overexpressed in FP versus FN |

## Supplementary Table 10 (continued)

| Symbol    | Log2.Fold.Change | Log2.AveExpr | Adjusted.P.value | Category                      |
|-----------|------------------|--------------|------------------|-------------------------------|
| CD79B     | 2.342            | 3.113        | 0                | Overexpressed in FP versus FN |
| CD47      | 1.278            | 6.330        | 0                | Overexpressed in FP versus FN |
| LSS       | 1.178            | 7.002        | 0                | Overexpressed in FP versus FN |
| XKR7      | 3.978            | -2.657       | 0                | Overexpressed in FP versus FN |
| NTSR1     | 2.961            | 1.033        | 0                | Overexpressed in FP versus FN |
| ATP8B4    | 1.851            | 2.719        | 0                | Overexpressed in FP versus FN |
| PROX1     | 1.755            | 6.090        | 0                | Overexpressed in FP versus FN |
| LINC00472 | 1.846            | 2.118        | 0                | Overexpressed in FP versus FN |
| GRM6      | 2.002            | 0.885        | 0                | Overexpressed in FP versus FN |
| BZRAP1    | 2.598            | 4.072        | 0                | Overexpressed in FP versus FN |
| RGR       | 1.997            | 4.528        | 0                | Overexpressed in FP versus FN |
| FOXL1     | 2.080            | 1.304        | 0                | Overexpressed in FP versus FN |
| SLC46A3   | 1.433            | 3.316        | 0                | Overexpressed in FP versus FN |
| GAD1      | 3.661            | 2.182        | 0                | Overexpressed in FP versus FN |
| DNAH5     | 2.799            | 0.097        | 0                | Overexpressed in FP versus FN |
| SLC18A1   | 4.273            | 1.101        | 0                | Overexpressed in FP versus FN |
| BCL11A    | 1.995            | 4.594        | 0                | Overexpressed in FP versus FN |
| HES6      | 1.785            | 7.454        | 0                | Overexpressed in FP versus FN |
| CD8B      | 3.195            | 0.618        | 0                | Overexpressed in FP versus FN |
| PKD1L2    | 3.307            | -1.536       | 0                | Overexpressed in FP versus FN |
| INPPL1    | 1.082            | 9.095        | 0                | Overexpressed in FP versus FN |
| TRIM8     | 1.041            | 6.713        | 0                | Overexpressed in FP versus FN |
| SLC7A7    | 1.340            | 5.470        | 0                | Overexpressed in FP versus FN |
| IL4R      | 1.299            | 6.356        | 0                | Overexpressed in FP versus FN |
| NALCN     | 3.100            | 0.355        | 0                | Overexpressed in FP versus FN |

## Supplementary Table 10 (continued)

| Symbol       | Log2.Fold.Change | Log2.AveExpr | Adjusted.P.value | Category                      |
|--------------|------------------|--------------|------------------|-------------------------------|
| FAM64A       | 1.036            | 5.630        | 0                | Overexpressed in FP versus FN |
| MEGF10       | 1.085            | 8.236        | 0                | Overexpressed in FP versus FN |
| FRMD3        | 1.342            | 4.809        | 0                | Overexpressed in FP versus FN |
| LOC100996455 | 2.011            | 0.530        | 0                | Overexpressed in FP versus FN |
| WARS         | 1.005            | 6.517        | 0                | Overexpressed in FP versus FN |
| SORBS1       | 1.757            | 4.999        | 0                | Overexpressed in FP versus FN |
| NEUROG2      | 3.878            | -1.467       | 0                | Overexpressed in FP versus FN |
| FURIN        | 1.090            | 6.202        | 0                | Overexpressed in FP versus FN |
| GBP2         | 1.689            | 4.613        | 0                | Overexpressed in FP versus FN |
| DBH          | 1.661            | 3.656        | 0                | Overexpressed in FP versus FN |
| ASRGL1       | 1.434            | 3.944        | 0                | Overexpressed in FP versus FN |
| RRAGD        | 1.356            | 5.100        | 0                | Overexpressed in FP versus FN |
| IRX2         | 3.112            | 1.868        | 0                | Overexpressed in FP versus FN |
| THSD4        | 1.516            | 5.851        | 0                | Overexpressed in FP versus FN |
| IFITM10      | 2.156            | 3.532        | 0                | Overexpressed in FP versus FN |
| NAV2         | 1.447            | 6.533        | 0                | Overexpressed in FP versus FN |
| PDE4DIP      | 1.685            | 6.567        | 0                | Overexpressed in FP versus FN |
| C9orf172     | 1.959            | 1.452        | 0                | Overexpressed in FP versus FN |
| CAPN11       | 1.685            | 2.044        | 0                | Overexpressed in FP versus FN |
| MIR210HG     | 1.618            | 3.066        | 0                | Overexpressed in FP versus FN |
| FOXI1        | 5.643            | -2.422       | 0                | Overexpressed in FP versus FN |
| TMEM56       | 2.999            | 3.442        | 0                | Overexpressed in FP versus FN |
| SLC6A18      | 3.471            | -3.328       | 0                | Overexpressed in FP versus FN |
| PTGR1        | 1.340            | 4.828        | 0                | Overexpressed in FP versus FN |
| CCKBR        | 5.829            | -1.968       | 0                | Overexpressed in FP versus FN |

## Supplementary Table 10 (continued)

| Symbol       | Log2.Fold.Change | Log2.AveExpr | Adjusted.P.value | Category                      |
|--------------|------------------|--------------|------------------|-------------------------------|
| FGGY         | 1.459            | 3.160        | 0                | Overexpressed in FP versus FN |
| ADORA2A      | 1.191            | 3.793        | 0                | Overexpressed in FP versus FN |
| TLE6         | 1.556            | 1.416        | 0                | Overexpressed in FP versus FN |
| TGM3         | 4.465            | 0.494        | 0                | Overexpressed in FP versus FN |
| PLS1         | 2.823            | -0.085       | 0                | Overexpressed in FP versus FN |
| ASIC1        | 1.337            | 5.299        | 0                | Overexpressed in FP versus FN |
| PCBD1        | 1.025            | 5.392        | 0                | Overexpressed in FP versus FN |
| KCNS3        | 1.332            | 4.901        | 0                | Overexpressed in FP versus FN |
| MUC4         | 4.489            | 2.638        | 0                | Overexpressed in FP versus FN |
| LHX3         | 4.219            | -3.623       | 0                | Overexpressed in FP versus FN |
| SALL3        | 6.385            | -1.197       | 0                | Overexpressed in FP versus FN |
| PDIA2        | 2.881            | 3.276        | 0                | Overexpressed in FP versus FN |
| ATP6V0A4     | 2.845            | 0.353        | 0                | Overexpressed in FP versus FN |
| GYPC         | 2.088            | 5.941        | 0                | Overexpressed in FP versus FN |
| FUT3         | 3.043            | 1.102        | 0                | Overexpressed in FP versus FN |
| PPDPF        | 1.197            | 6.961        | 0                | Overexpressed in FP versus FN |
| LOC100506844 | 1.110            | 3.623        | 0                | Overexpressed in FP versus FN |
| NUDT10       | 2.067            | 2.292        | 0                | Overexpressed in FP versus FN |
| ANKRD65      | 2.052            | 4.619        | 0                | Overexpressed in FP versus FN |
| N4BP3        | 1.080            | 6.452        | 0                | Overexpressed in FP versus FN |
| TMCO4        | 1.575            | 2.947        | 0                | Overexpressed in FP versus FN |
| PLIN5        | 2.379            | 1.937        | 0                | Overexpressed in FP versus FN |
| CHD7         | 1.497            | 7.494        | 0                | Overexpressed in FP versus FN |
| FAM189A2     | 2.505            | 2.127        | 0                | Overexpressed in FP versus FN |
| OTP          | 5.915            | 0.140        | 0                | Overexpressed in FP versus FN |

## Supplementary Table 10 (continued)

| Symbol       | Log2.Fold.Change | Log2.AveExpr | Adjusted.P.value | Category                      |
|--------------|------------------|--------------|------------------|-------------------------------|
| DAG1         | 1.142            | 8.212        | 0                | Overexpressed in FP versus FN |
| SPINT2       | 2.337            | 4.270        | 0                | Overexpressed in FP versus FN |
| LINC00319    | 2.085            | 1.100        | 0                | Overexpressed in FP versus FN |
| C5orf38      | 2.853            | -0.244       | 0                | Overexpressed in FP versus FN |
| HID1         | 2.221            | 3.517        | 0                | Overexpressed in FP versus FN |
| KLHL40       | 2.364            | 4.399        | 0                | Overexpressed in FP versus FN |
| RNF165       | 1.113            | 5.453        | 0                | Overexpressed in FP versus FN |
| TRIM45       | 1.348            | 6.406        | 0                | Overexpressed in FP versus FN |
| LMX1B        | 2.654            | 3.707        | 0                | Overexpressed in FP versus FN |
| CD151        | 1.139            | 7.717        | 0                | Overexpressed in FP versus FN |
| POU4F2       | 4.942            | -3.839       | 0                | Overexpressed in FP versus FN |
| AKR1B15      | 2.606            | 0.291        | 0                | Overexpressed in FP versus FN |
| DNASE1L2     | 1.691            | 1.642        | 0                | Overexpressed in FP versus FN |
| DIO2         | 2.692            | 3.932        | 0                | Overexpressed in FP versus FN |
| NACAD        | 1.199            | 4.118        | 0                | Overexpressed in FP versus FN |
| QPRT         | 1.145            | 5.195        | 0                | Overexpressed in FP versus FN |
| PDZD2        | 1.618            | 4.603        | 0                | Overexpressed in FP versus FN |
| AMZ1         | 1.915            | 0.409        | 0                | Overexpressed in FP versus FN |
| CD82         | 1.178            | 6.826        | 0                | Overexpressed in FP versus FN |
| NUDT14       | 1.072            | 4.677        | 0                | Overexpressed in FP versus FN |
| PTPRD        | 1.095            | 7.885        | 0                | Overexpressed in FP versus FN |
| DTX3         | 1.400            | 6.872        | 0                | Overexpressed in FP versus FN |
| ATP6V0E2-AS1 | 1.346            | 2.607        | 0                | Overexpressed in FP versus FN |
| CDH15        | 1.250            | 8.404        | 0                | Overexpressed in FP versus FN |
| MXD3         | 1.088            | 5.610        | 0                | Overexpressed in FP versus FN |

## Supplementary Table 10 (continued)

| Symbol       | Log2.Fold.Change | Log2.AveExpr | Adjusted.P.value | Category                      |
|--------------|------------------|--------------|------------------|-------------------------------|
| PLIN4        | 2.267            | 2.840        | 0.000            | Overexpressed in FP versus FN |
| SOX8         | 1.484            | 8.328        | 0.000            | Overexpressed in FP versus FN |
| SCT          | 3.260            | 2.030        | 0.000            | Overexpressed in FP versus FN |
| STAC3        | 2.098            | 7.850        | 0.000            | Overexpressed in FP versus FN |
| TIAM2        | 1.128            | 3.054        | 0.000            | Overexpressed in FP versus FN |
| BMP10        | 3.354            | -4.370       | 0.000            | Overexpressed in FP versus FN |
| KRT33B       | 4.398            | -3.623       | 0.000            | Overexpressed in FP versus FN |
| COLQ         | 1.217            | 4.654        | 0.000            | Overexpressed in FP versus FN |
| GSG1L        | 2.891            | 3.239        | 0.000            | Overexpressed in FP versus FN |
| SP8          | 5.030            | -1.977       | 0.000            | Overexpressed in FP versus FN |
| APBA1        | 1.611            | 3.305        | 0.000            | Overexpressed in FP versus FN |
| AHRR         | 2.114            | 2.271        | 0.000            | Overexpressed in FP versus FN |
| HR           | 2.455            | 4.745        | 0.000            | Overexpressed in FP versus FN |
| LOC100128288 | 1.000            | 3.634        | 0.000            | Overexpressed in FP versus FN |
| PLXDC1       | 1.038            | 5.906        | 0.000            | Overexpressed in FP versus FN |
| CDH20        | 4.433            | 0.648        | 0.001            | Overexpressed in FP versus FN |
| SLCO3A1      | 1.381            | 3.958        | 0.000            | Overexpressed in FP versus FN |
| SPAG8        | 1.193            | 1.740        | 0.000            | Overexpressed in FP versus FN |
| HMX3         | 4.075            | -3.180       | 0.001            | Overexpressed in FP versus FN |
| UNQ6494      | 2.830            | -2.032       | 0.001            | Overexpressed in FP versus FN |
| PLCXD3       | 4.612            | -1.546       | 0.001            | Overexpressed in FP versus FN |
| WNT7A        | 4.293            | -2.617       | 0.001            | Overexpressed in FP versus FN |
| GDF10        | 3.051            | 0.247        | 0.001            | Overexpressed in FP versus FN |
| NGB          | 4.180            | -2.095       | 0.001            | Overexpressed in FP versus FN |
| PCP4         | 3.028            | 1.491        | 0.001            | Overexpressed in FP versus FN |

## Supplementary Table 10 (continued)

| Symbol     | Log2.Fold.Change | Log2.AveExpr | Adjusted.P.value | Category                      |
|------------|------------------|--------------|------------------|-------------------------------|
| TMEM47     | 1.399            | 5.846        | 0.000            | Overexpressed in FP versus FN |
| SOX3       | 4.160            | -3.094       | 0.001            | Overexpressed in FP versus FN |
| KCNJ12     | 2.283            | 2.396        | 0.001            | Overexpressed in FP versus FN |
| CLCN5      | 1.512            | 8.623        | 0.000            | Overexpressed in FP versus FN |
| CNPY1      | 3.598            | -0.683       | 0.001            | Overexpressed in FP versus FN |
| BLCAP      | 1.407            | 7.856        | 0.000            | Overexpressed in FP versus FN |
| KCNC2      | 6.135            | -2.503       | 0.001            | Overexpressed in FP versus FN |
| SPIN3      | 1.358            | 4.883        | 0.000            | Overexpressed in FP versus FN |
| FAM107A    | 2.650            | 3.424        | 0.000            | Overexpressed in FP versus FN |
| LOC653513  | 2.129            | 0.304        | 0.001            | Overexpressed in FP versus FN |
| FAM174B    | 1.031            | 5.279        | 0.000            | Overexpressed in FP versus FN |
| BVES       | 1.179            | 6.255        | 0.000            | Overexpressed in FP versus FN |
| GPR153     | 1.147            | 6.882        | 0.000            | Overexpressed in FP versus FN |
| SOX5       | 2.439            | 0.854        | 0.001            | Overexpressed in FP versus FN |
| KLF15      | 1.775            | 1.245        | 0.001            | Overexpressed in FP versus FN |
| UPB1       | 2.126            | -0.171       | 0.001            | Overexpressed in FP versus FN |
| MYL4       | 2.546            | 7.123        | 0.000            | Overexpressed in FP versus FN |
| SLC6A3     | 4.980            | 0.739        | 0.001            | Overexpressed in FP versus FN |
| ZNF790-AS1 | 1.284            | 1.982        | 0.001            | Overexpressed in FP versus FN |
| PTGES3L    | 1.873            | 2.193        | 0.001            | Overexpressed in FP versus FN |
| SMTNL2     | 2.144            | 2.785        | 0.001            | Overexpressed in FP versus FN |
| TP53AIP1   | 2.394            | 1.037        | 0.001            | Overexpressed in FP versus FN |
| BTBD9      | 1.243            | 5.068        | 0.000            | Overexpressed in FP versus FN |
| KCNMA1     | 1.328            | 4.705        | 0.000            | Overexpressed in FP versus FN |
| PPFIA4     | 1.435            | 7.298        | 0.000            | Overexpressed in FP versus FN |

## Supplementary Table 10 (continued)

| Symbol       | Log2.Fold.Change | Log2.AveExpr | Adjusted.P.value | Category                      |
|--------------|------------------|--------------|------------------|-------------------------------|
| CHADL        | 1.785            | 3.068        | 0.001            | Overexpressed in FP versus FN |
| SLC38A1      | 1.143            | 8.253        | 0.001            | Overexpressed in FP versus FN |
| TNNT2        | 2.421            | 8.267        | 0.001            | Overexpressed in FP versus FN |
| PTK6         | 2.320            | 1.620        | 0.001            | Overexpressed in FP versus FN |
| MAL          | 3.013            | -0.048       | 0.001            | Overexpressed in FP versus FN |
| INSM1        | 2.809            | 1.669        | 0.001            | Overexpressed in FP versus FN |
| ZNF488       | 1.319            | 4.438        | 0.001            | Overexpressed in FP versus FN |
| LOC645166    | 1.350            | 4.646        | 0.000            | Overexpressed in FP versus FN |
| TMEM252      | 2.075            | -0.931       | 0.001            | Overexpressed in FP versus FN |
| HSPG2        | 1.285            | 8.881        | 0.001            | Overexpressed in FP versus FN |
| TDRKH        | 1.151            | 3.133        | 0.001            | Overexpressed in FP versus FN |
| CRYAB        | 2.311            | 5.525        | 0.000            | Overexpressed in FP versus FN |
| SKP2         | 1.031            | 8.486        | 0.001            | Overexpressed in FP versus FN |
| FAR2         | 1.623            | 4.231        | 0.001            | Overexpressed in FP versus FN |
| TEX26-AS1    | 3.279            | 2.845        | 0.001            | Overexpressed in FP versus FN |
| KIF17        | 1.518            | 2.902        | 0.001            | Overexpressed in FP versus FN |
| ZNF681       | 1.952            | 2.746        | 0.001            | Overexpressed in FP versus FN |
| NEUROD4      | 3.686            | -2.421       | 0.001            | Overexpressed in FP versus FN |
| AGPAT2       | 1.170            | 4.839        | 0.001            | Overexpressed in FP versus FN |
| ZNF300P1     | 2.493            | 0.801        | 0.001            | Overexpressed in FP versus FN |
| LOC100130370 | 1.906            | 1.087        | 0.001            | Overexpressed in FP versus FN |
| PITRM1-AS1   | 1.261            | 2.782        | 0.001            | Overexpressed in FP versus FN |
| FANK1        | 1.409            | 0.688        | 0.001            | Overexpressed in FP versus FN |
| TRPM8        | 2.492            | -0.750       | 0.001            | Overexpressed in FP versus FN |
| GRM2         | 3.606            | 1.991        | 0.001            | Overexpressed in FP versus FN |



## Supplementary Table 10 (continued)

| Symbol       | Log2.Fold.Change | Log2.AveExpr | Adjusted.P.value | Category                      |
|--------------|------------------|--------------|------------------|-------------------------------|
| H19          | 2.765            | 9.501        | 0.001            | Overexpressed in FP versus FN |
| ANKRD6       | 1.372            | 3.986        | 0.001            | Overexpressed in FP versus FN |
| MAMSTR       | 1.255            | 6.976        | 0.001            | Overexpressed in FP versus FN |
| IQCG         | 1.429            | 3.705        | 0.001            | Overexpressed in FP versus FN |
| MORN4        | 1.288            | 3.069        | 0.001            | Overexpressed in FP versus FN |
| FGFR4        | 1.495            | 9.707        | 0.001            | Overexpressed in FP versus FN |
| SCAMP5       | 1.633            | 4.467        | 0.001            | Overexpressed in FP versus FN |
| DISP1        | 1.134            | 5.347        | 0.001            | Overexpressed in FP versus FN |
| MPV17L       | 1.598            | 1.185        | 0.001            | Overexpressed in FP versus FN |
| PTCHD4       | 2.238            | 0.370        | 0.001            | Overexpressed in FP versus FN |
| WNT2         | 2.849            | -0.928       | 0.001            | Overexpressed in FP versus FN |
| MYO7B        | 2.517            | 5.988        | 0.001            | Overexpressed in FP versus FN |
| TBC1D9       | 1.082            | 4.960        | 0.001            | Overexpressed in FP versus FN |
| MTMR7        | 1.571            | 4.631        | 0.001            | Overexpressed in FP versus FN |
| TFCP2L1      | 2.519            | 2.144        | 0.001            | Overexpressed in FP versus FN |
| MRPL23-AS1   | 1.543            | 2.382        | 0.001            | Overexpressed in FP versus FN |
| LOC100128675 | 5.165            | -1.266       | 0.001            | Overexpressed in FP versus FN |
| PRKAR2B      | 2.784            | 2.778        | 0.001            | Overexpressed in FP versus FN |
| CLDND2       | 1.225            | 1.369        | 0.001            | Overexpressed in FP versus FN |
| FBXL2        | 1.002            | 3.521        | 0.001            | Overexpressed in FP versus FN |
| PCBP4        | 1.324            | 7.595        | 0.001            | Overexpressed in FP versus FN |
| HLX          | 1.081            | 4.946        | 0.001            | Overexpressed in FP versus FN |
| MAFA         | 2.439            | 2.691        | 0.001            | Overexpressed in FP versus FN |
| SLC6A17      | 2.749            | 0.286        | 0.001            | Overexpressed in FP versus FN |
| BVES-AS1     | 1.139            | 2.190        | 0.001            | Overexpressed in FP versus FN |

## Supplementary Table 10 (continued)

| Symbol       | Log2.Fold.Change | Log2.AveExpr | Adjusted.P.value | Category                      |
|--------------|------------------|--------------|------------------|-------------------------------|
| PKM          | 1.129            | 9.935        | 0.001            | Overexpressed in FP versus FN |
| MET          | 1.403            | 6.409        | 0.001            | Overexpressed in FP versus FN |
| TMEM132B     | 4.160            | 2.308        | 0.001            | Overexpressed in FP versus FN |
| FOXA2        | 4.230            | -2.110       | 0.001            | Overexpressed in FP versus FN |
| MMP24        | 1.152            | 3.446        | 0.001            | Overexpressed in FP versus FN |
| SLC45A1      | 1.417            | 1.865        | 0.001            | Overexpressed in FP versus FN |
| CDH22        | 2.377            | -0.474       | 0.002            | Overexpressed in FP versus FN |
| GRHL3        | 3.071            | -1.625       | 0.002            | Overexpressed in FP versus FN |
| CUX2         | 2.611            | 0.662        | 0.001            | Overexpressed in FP versus FN |
| GOLGA2P5     | 1.337            | 2.814        | 0.001            | Overexpressed in FP versus FN |
| RPRML        | 2.514            | -0.244       | 0.002            | Overexpressed in FP versus FN |
| LOC100130275 | 2.651            | 0.276        | 0.002            | Overexpressed in FP versus FN |
| SNTG2        | 2.228            | 2.198        | 0.001            | Overexpressed in FP versus FN |
| CHRD         | 1.314            | 6.270        | 0.001            | Overexpressed in FP versus FN |
| SLC4A11      | 1.779            | 3.142        | 0.001            | Overexpressed in FP versus FN |
| GATA2        | 1.497            | 3.332        | 0.001            | Overexpressed in FP versus FN |
| CDH19        | 4.109            | -1.958       | 0.002            | Overexpressed in FP versus FN |
| CBLN1        | 2.857            | 1.108        | 0.002            | Overexpressed in FP versus FN |
| ZNF718       | 1.583            | 1.028        | 0.002            | Overexpressed in FP versus FN |
| HRH3         | 3.447            | 1.466        | 0.002            | Overexpressed in FP versus FN |
| ACE          | 1.119            | 4.215        | 0.001            | Overexpressed in FP versus FN |
| ALOX15       | 3.662            | 1.989        | 0.001            | Overexpressed in FP versus FN |
| LOC253039    | 1.169            | 4.377        | 0.001            | Overexpressed in FP versus FN |
| TSTD1        | 1.200            | 3.622        | 0.001            | Overexpressed in FP versus FN |
| LPPR1        | 2.498            | 3.107        | 0.001            | Overexpressed in FP versus FN |

## Supplementary Table 10 (continued)

| Symbol    | Log2.Fold.Change | Log2.AveExpr | Adjusted.P.value | Category                      |
|-----------|------------------|--------------|------------------|-------------------------------|
| TUBB4B    | 1.003            | 7.875        | 0.001            | Overexpressed in FP versus FN |
| NEUROD1   | 4.859            | -3.028       | 0.002            | Overexpressed in FP versus FN |
| HMP19     | 3.273            | -0.016       | 0.002            | Overexpressed in FP versus FN |
| GRIN1     | 3.685            | 0.484        | 0.002            | Overexpressed in FP versus FN |
| ZNF835    | 1.155            | 2.575        | 0.001            | Overexpressed in FP versus FN |
| FAM155A   | 2.515            | 1.310        | 0.002            | Overexpressed in FP versus FN |
| MACROD1   | 1.101            | 5.418        | 0.001            | Overexpressed in FP versus FN |
| F12       | 2.028            | 0.593        | 0.002            | Overexpressed in FP versus FN |
| DLX1      | 2.761            | 1.377        | 0.002            | Overexpressed in FP versus FN |
| C1orf226  | 1.715            | 1.974        | 0.002            | Overexpressed in FP versus FN |
| IZUMO4    | 1.074            | 1.666        | 0.002            | Overexpressed in FP versus FN |
| TSPAN33   | 1.496            | 6.646        | 0.001            | Overexpressed in FP versus FN |
| NLGN4X    | 1.662            | 2.614        | 0.002            | Overexpressed in FP versus FN |
| FAM49A    | 1.119            | 4.737        | 0.001            | Overexpressed in FP versus FN |
| FAM65C    | 1.926            | 2.908        | 0.002            | Overexpressed in FP versus FN |
| FOXD3     | 3.084            | 0.906        | 0.002            | Overexpressed in FP versus FN |
| MRPL23    | 1.069            | 5.805        | 0.001            | Overexpressed in FP versus FN |
| TBX15     | 1.063            | 6.214        | 0.001            | Overexpressed in FP versus FN |
| CDKL2     | 2.324            | -0.700       | 0.002            | Overexpressed in FP versus FN |
| LHFPL3    | 3.904            | -2.392       | 0.002            | Overexpressed in FP versus FN |
| RAB11FIP4 | 1.262            | 4.179        | 0.001            | Overexpressed in FP versus FN |
| EEF1A2    | 3.816            | 2.512        | 0.002            | Overexpressed in FP versus FN |
| GRIP1     | 2.608            | 3.468        | 0.002            | Overexpressed in FP versus FN |
| PCDHB5    | 1.870            | 3.161        | 0.002            | Overexpressed in FP versus FN |
| MAB21L1   | 2.498            | 3.137        | 0.002            | Overexpressed in FP versus FN |

## Supplementary Table 10 (continued)

| Symbol    | Log2.Fold.Change | Log2.AveExpr | Adjusted.P.value | Category                      |
|-----------|------------------|--------------|------------------|-------------------------------|
| ZSCAN12P1 | 1.283            | 1.563        | 0.002            | Overexpressed in FP versus FN |
| RPL23P8   | 1.405            | 6.880        | 0.001            | Overexpressed in FP versus FN |
| NUDT7     | 1.547            | 1.088        | 0.002            | Overexpressed in FP versus FN |
| SHD       | 1.124            | 7.562        | 0.001            | Overexpressed in FP versus FN |
| DCC       | 4.036            | 0.043        | 0.002            | Overexpressed in FP versus FN |
| RAPGEF4   | 1.826            | 3.091        | 0.002            | Overexpressed in FP versus FN |
| HPN       | 2.839            | -0.835       | 0.003            | Overexpressed in FP versus FN |
| MYOG      | 1.822            | 9.029        | 0.002            | Overexpressed in FP versus FN |
| HS3ST4    | 3.641            | -2.401       | 0.003            | Overexpressed in FP versus FN |
| MMP12     | 3.294            | -2.403       | 0.003            | Overexpressed in FP versus FN |
| TMEM63C   | 2.084            | 2.834        | 0.002            | Overexpressed in FP versus FN |
| PALM2     | 1.276            | 4.681        | 0.001            | Overexpressed in FP versus FN |
| CEND1     | 1.575            | 0.606        | 0.003            | Overexpressed in FP versus FN |
| PLA2G4D   | 2.531            | 0.811        | 0.002            | Overexpressed in FP versus FN |
| MYOZ2     | 2.997            | 3.884        | 0.002            | Overexpressed in FP versus FN |
| ZNF214    | 1.725            | 1.122        | 0.002            | Overexpressed in FP versus FN |
| GBX2      | 1.858            | 1.885        | 0.002            | Overexpressed in FP versus FN |
| TPM2      | 1.373            | 9.713        | 0.002            | Overexpressed in FP versus FN |
| MDGA1     | 1.515            | 4.516        | 0.001            | Overexpressed in FP versus FN |
| HOMER2    | 1.209            | 3.208        | 0.002            | Overexpressed in FP versus FN |
| POLN      | 1.174            | 1.279        | 0.003            | Overexpressed in FP versus FN |
| SIRT2     | 1.257            | 7.796        | 0.002            | Overexpressed in FP versus FN |
| DBNDD1    | 1.493            | 4.698        | 0.001            | Overexpressed in FP versus FN |
| PAX1      | 3.865            | -0.820       | 0.003            | Overexpressed in FP versus FN |
| ZNF229    | 1.549            | 3.098        | 0.002            | Overexpressed in FP versus FN |

## Supplementary Table 10 (continued)

| Symbol       | Log2.Fold.Change | Log2.AveExpr | Adjusted.P.value | Category                      |
|--------------|------------------|--------------|------------------|-------------------------------|
| RYR3         | 1.878            | 5.173        | 0.001            | Overexpressed in FP versus FN |
| H2AFY2       | 1.213            | 6.157        | 0.001            | Overexpressed in FP versus FN |
| TCP10L       | 1.442            | 0.908        | 0.003            | Overexpressed in FP versus FN |
| GRIN2A       | 2.764            | -1.473       | 0.003            | Overexpressed in FP versus FN |
| SCAND3       | 3.001            | 0.936        | 0.003            | Overexpressed in FP versus FN |
| SLC35F1      | 2.028            | 0.036        | 0.003            | Overexpressed in FP versus FN |
| HSPA1A       | 1.810            | 4.825        | 0.002            | Overexpressed in FP versus FN |
| CRIP2        | 1.183            | 7.371        | 0.002            | Overexpressed in FP versus FN |
| CACNA2D2     | 1.903            | 5.104        | 0.002            | Overexpressed in FP versus FN |
| PRTG         | 2.498            | 2.899        | 0.002            | Overexpressed in FP versus FN |
| HGFAC        | 1.195            | 2.310        | 0.002            | Overexpressed in FP versus FN |
| AFAP1L2      | 1.107            | 5.633        | 0.002            | Overexpressed in FP versus FN |
| PPIP5K1      | 1.019            | 2.766        | 0.002            | Overexpressed in FP versus FN |
| FOXD4L1      | 1.781            | 1.429        | 0.003            | Overexpressed in FP versus FN |
| STC2         | 1.147            | 7.201        | 0.002            | Overexpressed in FP versus FN |
| EPB41L4B     | 1.956            | 2.705        | 0.002            | Overexpressed in FP versus FN |
| LOC100144602 | 3.221            | -3.550       | 0.004            | Overexpressed in FP versus FN |
| SSC5D        | 1.785            | 5.253        | 0.002            | Overexpressed in FP versus FN |
| C9orf170     | 1.162            | 1.834        | 0.003            | Overexpressed in FP versus FN |
| GPR37L1      | 2.579            | -3.427       | 0.004            | Overexpressed in FP versus FN |
| LRRRC61      | 1.704            | 3.545        | 0.002            | Overexpressed in FP versus FN |
| OCIAD2       | 1.389            | 3.811        | 0.002            | Overexpressed in FP versus FN |
| ALDOA        | 1.141            | 9.444        | 0.002            | Overexpressed in FP versus FN |
| GPR83        | 1.963            | 0.407        | 0.003            | Overexpressed in FP versus FN |
| UNCX         | 4.289            | -3.053       | 0.004            | Overexpressed in FP versus FN |

## Supplementary Table 10 (continued)

| Symbol       | Log2.Fold.Change | Log2.AveExpr | Adjusted.P.value | Category                      |
|--------------|------------------|--------------|------------------|-------------------------------|
| ANO1         | 1.136            | 4.425        | 0.002            | Overexpressed in FP versus FN |
| CAMSAP3      | 2.498            | 0.166        | 0.004            | Overexpressed in FP versus FN |
| C1QTNF1      | 1.215            | 4.166        | 0.002            | Overexpressed in FP versus FN |
| NRAP         | 3.172            | -1.391       | 0.004            | Overexpressed in FP versus FN |
| PCDHB15      | 1.077            | 2.388        | 0.003            | Overexpressed in FP versus FN |
| ZNF804A      | 2.143            | 1.756        | 0.003            | Overexpressed in FP versus FN |
| TCF15        | 1.873            | 1.938        | 0.003            | Overexpressed in FP versus FN |
| PAIP2B       | 1.124            | 2.759        | 0.003            | Overexpressed in FP versus FN |
| MPP7         | 2.279            | 1.224        | 0.004            | Overexpressed in FP versus FN |
| ABCC3        | 2.218            | 3.276        | 0.003            | Overexpressed in FP versus FN |
| ELAVL2       | 1.892            | 3.927        | 0.002            | Overexpressed in FP versus FN |
| SRRM4        | 4.519            | 1.814        | 0.004            | Overexpressed in FP versus FN |
| C1orf105     | 1.878            | 4.194        | 0.002            | Overexpressed in FP versus FN |
| LOC100507433 | 1.260            | 2.819        | 0.003            | Overexpressed in FP versus FN |
| RHBDL1       | 1.322            | 2.651        | 0.003            | Overexpressed in FP versus FN |
| ZNF132       | 1.023            | 2.478        | 0.003            | Overexpressed in FP versus FN |
| ADIRF        | 1.257            | 2.418        | 0.003            | Overexpressed in FP versus FN |
| KCNH3        | 1.907            | 2.983        | 0.003            | Overexpressed in FP versus FN |
| GNG4         | 2.687            | 3.819        | 0.003            | Overexpressed in FP versus FN |
| PFN1         | 1.202            | 9.591        | 0.003            | Overexpressed in FP versus FN |
| AKR7A3       | 1.579            | 1.027        | 0.004            | Overexpressed in FP versus FN |
| ZDHHC22      | 1.884            | 3.312        | 0.003            | Overexpressed in FP versus FN |
| RPL7A        | 1.186            | 8.944        | 0.003            | Overexpressed in FP versus FN |
| MPPED2       | 1.619            | 5.016        | 0.002            | Overexpressed in FP versus FN |
| NACA         | 1.029            | 10.026       | 0.003            | Overexpressed in FP versus FN |

## Supplementary Table 10 (continued)

| Symbol       | Log2.Fold.Change | Log2.AveExpr | Adjusted.P.value | Category                      |
|--------------|------------------|--------------|------------------|-------------------------------|
| CDH1         | 2.522            | 1.558        | 0.004            | Overexpressed in FP versus FN |
| S1PR1        | 1.238            | 4.450        | 0.002            | Overexpressed in FP versus FN |
| FAM163A      | 2.610            | 1.076        | 0.004            | Overexpressed in FP versus FN |
| STXBP6       | 1.821            | 2.266        | 0.004            | Overexpressed in FP versus FN |
| HES2         | 2.430            | -1.068       | 0.005            | Overexpressed in FP versus FN |
| RPL34        | 1.042            | 7.518        | 0.003            | Overexpressed in FP versus FN |
| CATSPERG     | 1.533            | 1.555        | 0.004            | Overexpressed in FP versus FN |
| LRRC14B      | 2.501            | 0.141        | 0.005            | Overexpressed in FP versus FN |
| EPHA5        | 3.221            | -1.422       | 0.005            | Overexpressed in FP versus FN |
| CTNND2       | 2.888            | 1.727        | 0.004            | Overexpressed in FP versus FN |
| LRRC20       | 1.002            | 4.862        | 0.003            | Overexpressed in FP versus FN |
| C14orf64     | 1.170            | 1.353        | 0.005            | Overexpressed in FP versus FN |
| VTCN1        | 1.765            | -0.276       | 0.006            | Overexpressed in FP versus FN |
| UNC80        | 2.052            | 3.465        | 0.003            | Overexpressed in FP versus FN |
| ANK2         | 1.501            | 6.311        | 0.003            | Overexpressed in FP versus FN |
| NRG3         | 2.516            | -1.084       | 0.006            | Overexpressed in FP versus FN |
| LOC100505875 | 2.281            | 0.215        | 0.006            | Overexpressed in FP versus FN |
| LDLRAD2      | 1.252            | 1.589        | 0.005            | Overexpressed in FP versus FN |
| KIAA0895     | 1.742            | 1.778        | 0.005            | Overexpressed in FP versus FN |
| CHGA         | 3.550            | 0.287        | 0.006            | Overexpressed in FP versus FN |
| CRIP1        | 1.129            | 3.982        | 0.003            | Overexpressed in FP versus FN |
| GABBR2       | 2.253            | -0.949       | 0.006            | Overexpressed in FP versus FN |
| MYBPHL       | 2.067            | 2.317        | 0.005            | Overexpressed in FP versus FN |
| ACADL        | 2.194            | 1.515        | 0.005            | Overexpressed in FP versus FN |
| RMST         | 3.589            | -3.397       | 0.007            | Overexpressed in FP versus FN |

### Supplementary Table 10 (continued)

| Symbol       | Log2.Fold.Change | Log2.AveExpr | Adjusted.P.value | Category                      |
|--------------|------------------|--------------|------------------|-------------------------------|
| HSF4         | 1.124            | 4.900        | 0.003            | Overexpressed in FP versus FN |
| BCMO1        | 1.775            | -0.118       | 0.006            | Overexpressed in FP versus FN |
| C20orf166    | 2.082            | 2.301        | 0.005            | Overexpressed in FP versus FN |
| WNT6         | 2.117            | 1.214        | 0.006            | Overexpressed in FP versus FN |
| LINC00461    | 3.399            | 0.788        | 0.006            | Overexpressed in FP versus FN |
| RPL35        | 1.255            | 8.986        | 0.004            | Overexpressed in FP versus FN |
| SLC24A4      | 1.896            | 2.797        | 0.005            | Overexpressed in FP versus FN |
| GLB1L3       | 2.304            | -1.992       | 0.007            | Overexpressed in FP versus FN |
| PCDHGA11     | 1.353            | 0.291        | 0.007            | Overexpressed in FP versus FN |
| FBXO16       | 1.226            | 1.660        | 0.006            | Overexpressed in FP versus FN |
| MTUS2        | 1.607            | 4.249        | 0.004            | Overexpressed in FP versus FN |
| PFKP         | 1.151            | 5.109        | 0.003            | Overexpressed in FP versus FN |
| NEURL        | 1.560            | 4.050        | 0.004            | Overexpressed in FP versus FN |
| TST          | 1.048            | 3.714        | 0.004            | Overexpressed in FP versus FN |
| C2orf71      | 2.713            | -1.175       | 0.008            | Overexpressed in FP versus FN |
| CEBPA        | 1.377            | 4.194        | 0.004            | Overexpressed in FP versus FN |
| TOM1L1       | 1.636            | 2.898        | 0.005            | Overexpressed in FP versus FN |
| DCX          | 1.914            | 6.196        | 0.004            | Overexpressed in FP versus FN |
| RTN4RL1      | 1.322            | 1.400        | 0.006            | Overexpressed in FP versus FN |
| ZNF502       | 1.052            | 3.683        | 0.004            | Overexpressed in FP versus FN |
| TMPRSS2      | 2.819            | -3.179       | 0.009            | Overexpressed in FP versus FN |
| LOC100130476 | 1.609            | 0.674        | 0.007            | Overexpressed in FP versus FN |
| EVA1C        | 1.167            | 1.282        | 0.007            | Overexpressed in FP versus FN |
| SULF1        | 1.087            | 7.134        | 0.004            | Overexpressed in FP versus FN |
| RPL29        | 1.293            | 9.821        | 0.005            | Overexpressed in FP versus FN |



## Supplementary Table 10 (continued)

| Symbol      | Log2.Fold.Change | Log2.AveExpr | Adjusted.P.value | Category                      |
|-------------|------------------|--------------|------------------|-------------------------------|
| ST20        | 1.405            | 1.669        | 0.007            | Overexpressed in FP versus FN |
| PNPLA7      | 1.202            | 3.558        | 0.005            | Overexpressed in FP versus FN |
| TH          | 5.980            | 0.150        | 0.008            | Overexpressed in FP versus FN |
| LDB3        | 2.095            | 4.756        | 0.004            | Overexpressed in FP versus FN |
| PPP1R14A    | 1.627            | 2.602        | 0.006            | Overexpressed in FP versus FN |
| RPS6        | 1.335            | 11.079       | 0.006            | Overexpressed in FP versus FN |
| PEBP1       | 1.100            | 7.771        | 0.004            | Overexpressed in FP versus FN |
| PLA2G5      | 2.031            | -0.570       | 0.009            | Overexpressed in FP versus FN |
| SPATA18     | 1.663            | 2.182        | 0.006            | Overexpressed in FP versus FN |
| LINC00482   | 1.657            | 1.920        | 0.007            | Overexpressed in FP versus FN |
| NGEF        | 2.252            | 1.919        | 0.007            | Overexpressed in FP versus FN |
| EYA2        | 1.688            | 6.092        | 0.004            | Overexpressed in FP versus FN |
| CHRND       | 1.216            | 8.116        | 0.005            | Overexpressed in FP versus FN |
| ZNF560      | 2.813            | -0.262       | 0.009            | Overexpressed in FP versus FN |
| ADORA2A-AS1 | 1.062            | 1.268        | 0.008            | Overexpressed in FP versus FN |
| C8orf22     | 2.986            | -3.797       | 0.010            | Overexpressed in FP versus FN |
| ADCYAP1     | 4.083            | 0.168        | 0.009            | Overexpressed in FP versus FN |
| RPL13       | 1.079            | 10.730       | 0.006            | Overexpressed in FP versus FN |
| CIDEA       | 2.605            | -3.072       | 0.010            | Overexpressed in FP versus FN |
| SPSB4       | 1.084            | 5.802        | 0.004            | Overexpressed in FP versus FN |
| CNIH2       | 1.044            | 3.757        | 0.005            | Overexpressed in FP versus FN |
| TAGLN3      | 2.234            | 4.401        | 0.005            | Overexpressed in FP versus FN |
| FAM65B      | 1.134            | 5.811        | 0.004            | Overexpressed in FP versus FN |
| EPAS1       | 1.102            | 6.462        | 0.004            | Overexpressed in FP versus FN |
| FAM110A     | 1.162            | 5.044        | 0.004            | Overexpressed in FP versus FN |

## Supplementary Table 10 (continued)

| Symbol   | Log2.Fold.Change | Log2.AveExpr | Adjusted.P.value | Category                      |
|----------|------------------|--------------|------------------|-------------------------------|
| CERCAM   | 1.031            | 6.380        | 0.004            | Overexpressed in FP versus FN |
| L1CAM    | 2.725            | 3.371        | 0.006            | Overexpressed in FP versus FN |
| LINGO1   | 1.237            | 4.114        | 0.005            | Overexpressed in FP versus FN |
| PCDHGA6  | 1.223            | 1.299        | 0.008            | Overexpressed in FP versus FN |
| NEBL     | 2.067            | 2.575        | 0.007            | Overexpressed in FP versus FN |
| CD163L1  | 1.550            | 2.384        | 0.007            | Overexpressed in FP versus FN |
| ZNF626   | 1.248            | 3.368        | 0.006            | Overexpressed in FP versus FN |
| BTBD17   | 2.509            | -0.634       | 0.010            | Overexpressed in FP versus FN |
| PDE2A    | 1.367            | 4.325        | 0.005            | Overexpressed in FP versus FN |
| CPLX2    | 3.091            | -1.580       | 0.011            | Overexpressed in FP versus FN |
| NMU      | 1.989            | 0.966        | 0.009            | Overexpressed in FP versus FN |
| CAPN3    | 1.129            | 4.368        | 0.005            | Overexpressed in FP versus FN |
| ATP2C2   | 1.382            | 1.667        | 0.008            | Overexpressed in FP versus FN |
| MYL9     | 1.203            | 6.696        | 0.005            | Overexpressed in FP versus FN |
| GCA      | 1.522            | 3.216        | 0.006            | Overexpressed in FP versus FN |
| FBN3     | 1.613            | 7.137        | 0.005            | Overexpressed in FP versus FN |
| MYOD1    | 2.460            | 7.336        | 0.006            | Overexpressed in FP versus FN |
| ADCY2    | 2.406            | 2.185        | 0.008            | Overexpressed in FP versus FN |
| HRASLS   | 2.077            | 1.653        | 0.009            | Overexpressed in FP versus FN |
| DBX1     | 3.776            | 0.367        | 0.011            | Overexpressed in FP versus FN |
| SST      | 2.969            | -4.389       | 0.013            | Overexpressed in FP versus FN |
| HSPB7    | 2.482            | 2.335        | 0.008            | Overexpressed in FP versus FN |
| CEACAM16 | 1.809            | 0.552        | 0.011            | Overexpressed in FP versus FN |
| LCN10    | 1.907            | -0.371       | 0.011            | Overexpressed in FP versus FN |
| CAPN6    | 2.125            | 8.977        | 0.007            | Overexpressed in FP versus FN |

## Supplementary Table 10 (continued)

| Symbol       | Log2.Fold.Change | Log2.AveExpr | Adjusted.P.value | Category                      |
|--------------|------------------|--------------|------------------|-------------------------------|
| MN1          | 1.131            | 6.152        | 0.005            | Overexpressed in FP versus FN |
| ST6GAL2      | 1.242            | 5.091        | 0.005            | Overexpressed in FP versus FN |
| LOC100130776 | 1.107            | 2.050        | 0.009            | Overexpressed in FP versus FN |
| ERMN         | 2.010            | 0.276        | 0.011            | Overexpressed in FP versus FN |
| IQCA1        | 1.830            | 2.318        | 0.009            | Overexpressed in FP versus FN |
| ZNF662       | 1.445            | 4.488        | 0.006            | Overexpressed in FP versus FN |
| GP6          | 3.521            | -0.689       | 0.012            | Overexpressed in FP versus FN |
| IGSF22       | 1.714            | 1.825        | 0.009            | Overexpressed in FP versus FN |
| NIPA1        | 1.218            | 4.181        | 0.006            | Overexpressed in FP versus FN |
| ZNF772       | 1.017            | 4.179        | 0.006            | Overexpressed in FP versus FN |
| CACNA1B      | 2.199            | 2.258        | 0.009            | Overexpressed in FP versus FN |
| SEZ6L        | 2.381            | 2.761        | 0.008            | Overexpressed in FP versus FN |
| SCG3         | 3.524            | -1.356       | 0.013            | Overexpressed in FP versus FN |
| TOB2P1       | 1.024            | 1.887        | 0.010            | Overexpressed in FP versus FN |
| C21orf88     | 1.550            | 1.593        | 0.010            | Overexpressed in FP versus FN |
| ATRNL1       | 2.582            | 0.861        | 0.011            | Overexpressed in FP versus FN |
| TMOD1        | 1.943            | 1.987        | 0.010            | Overexpressed in FP versus FN |
| ZIK1         | 1.082            | 3.608        | 0.007            | Overexpressed in FP versus FN |
| SPATA31C2    | 1.681            | -0.405       | 0.013            | Overexpressed in FP versus FN |
| TMEM121      | 1.099            | 2.454        | 0.009            | Overexpressed in FP versus FN |
| C20orf85     | 2.027            | -4.053       | 0.015            | Overexpressed in FP versus FN |
| PPARGC1A     | 2.031            | 3.092        | 0.008            | Overexpressed in FP versus FN |
| AR           | 1.736            | 3.503        | 0.008            | Overexpressed in FP versus FN |
| FAAH2        | 1.497            | 0.909        | 0.012            | Overexpressed in FP versus FN |
| DRAXIN       | 1.665            | 0.941        | 0.012            | Overexpressed in FP versus FN |

## Supplementary Table 10 (continued)

| Symbol       | Log2.Fold.Change | Log2.AveExpr | Adjusted.P.value | Category                      |
|--------------|------------------|--------------|------------------|-------------------------------|
| RORC         | 1.786            | 2.238        | 0.010            | Overexpressed in FP versus FN |
| PLEKHA4      | 1.263            | 5.806        | 0.006            | Overexpressed in FP versus FN |
| PCDHB8       | 1.383            | 0.588        | 0.013            | Overexpressed in FP versus FN |
| MGC12916     | 1.469            | 2.042        | 0.011            | Overexpressed in FP versus FN |
| EHHADH       | 1.034            | 2.808        | 0.009            | Overexpressed in FP versus FN |
| PCSK9        | 1.706            | 0.975        | 0.013            | Overexpressed in FP versus FN |
| TMEM72-AS1   | 1.213            | 0.321        | 0.014            | Overexpressed in FP versus FN |
| LINC00514    | 1.779            | 0.178        | 0.014            | Overexpressed in FP versus FN |
| TSPAN18      | 1.019            | 5.604        | 0.006            | Overexpressed in FP versus FN |
| PKIB         | 1.987            | 2.066        | 0.011            | Overexpressed in FP versus FN |
| NOS1AP       | 1.603            | 0.277        | 0.014            | Overexpressed in FP versus FN |
| HERC2P2      | 1.020            | 5.534        | 0.006            | Overexpressed in FP versus FN |
| OLFML2A      | 1.099            | 7.246        | 0.007            | Overexpressed in FP versus FN |
| SSTR1        | 2.904            | 0.353        | 0.014            | Overexpressed in FP versus FN |
| SYNGR3       | 1.536            | 0.247        | 0.014            | Overexpressed in FP versus FN |
| HIP1R        | 1.268            | 6.381        | 0.007            | Overexpressed in FP versus FN |
| MAGI2        | 1.042            | 3.057        | 0.009            | Overexpressed in FP versus FN |
| PLIN1        | 1.904            | -0.703       | 0.016            | Overexpressed in FP versus FN |
| LOC100505695 | 1.524            | 1.639        | 0.013            | Overexpressed in FP versus FN |
| ZNF793       | 1.116            | 4.320        | 0.008            | Overexpressed in FP versus FN |
| DRD1         | 3.041            | -2.577       | 0.018            | Overexpressed in FP versus FN |
| ZNF300       | 1.637            | 4.424        | 0.008            | Overexpressed in FP versus FN |
| SKOR1        | 1.140            | 1.377        | 0.014            | Overexpressed in FP versus FN |
| STMN2        | 4.244            | 0.015        | 0.016            | Overexpressed in FP versus FN |
| CSPG5        | 1.240            | 1.887        | 0.013            | Overexpressed in FP versus FN |

## Supplementary Table 10 (continued)

| Symbol   | Log2.Fold.Change | Log2.AveExpr | Adjusted.P.value | Category                      |
|----------|------------------|--------------|------------------|-------------------------------|
| SLC22A3  | 1.918            | 3.258        | 0.010            | Overexpressed in FP versus FN |
| RPL23    | 1.118            | 8.935        | 0.010            | Overexpressed in FP versus FN |
| VIM      | 1.073            | 11.087       | 0.013            | Overexpressed in FP versus FN |
| TNFAIP3  | 1.037            | 5.107        | 0.008            | Overexpressed in FP versus FN |
| GRIA3    | 2.010            | -0.022       | 0.017            | Overexpressed in FP versus FN |
| FUT6     | 2.248            | -2.041       | 0.019            | Overexpressed in FP versus FN |
| ACTL6B   | 2.914            | -2.582       | 0.020            | Overexpressed in FP versus FN |
| STX11    | 1.120            | 2.629        | 0.012            | Overexpressed in FP versus FN |
| SFMBT2   | 1.116            | 4.595        | 0.008            | Overexpressed in FP versus FN |
| WBSCR17  | 2.222            | 3.357        | 0.011            | Overexpressed in FP versus FN |
| MYLK3    | 1.587            | 1.277        | 0.016            | Overexpressed in FP versus FN |
| ZNF717   | 1.473            | 0.345        | 0.018            | Overexpressed in FP versus FN |
| NPNT     | 1.367            | 6.033        | 0.008            | Overexpressed in FP versus FN |
| UBE2QL1  | 1.670            | 0.030        | 0.018            | Overexpressed in FP versus FN |
| MIR7-3HG | 2.855            | -3.540       | 0.022            | Overexpressed in FP versus FN |
| ESPNP    | 1.402            | 0.793        | 0.017            | Overexpressed in FP versus FN |
| AKR7L    | 1.094            | 1.530        | 0.016            | Overexpressed in FP versus FN |
| PDZK1    | 1.352            | -0.055       | 0.019            | Overexpressed in FP versus FN |
| C6orf164 | 1.010            | 0.947        | 0.017            | Overexpressed in FP versus FN |
| HCN1     | 2.356            | -0.980       | 0.020            | Overexpressed in FP versus FN |
| KBTBD12  | 2.134            | 0.439        | 0.018            | Overexpressed in FP versus FN |
| IL21R    | 1.627            | 2.624        | 0.013            | Overexpressed in FP versus FN |
| KRT31    | 2.653            | -1.493       | 0.021            | Overexpressed in FP versus FN |
| TAGLN    | 1.129            | 7.270        | 0.010            | Overexpressed in FP versus FN |
| RPL26    | 1.216            | 10.018       | 0.013            | Overexpressed in FP versus FN |

## Supplementary Table 10 (continued)

| Symbol    | Log2.Fold.Change | Log2.AveExpr | Adjusted.P.value | Category                      |
|-----------|------------------|--------------|------------------|-------------------------------|
| SVOP      | 2.606            | -2.107       | 0.023            | Overexpressed in FP versus FN |
| DHCR24    | 1.149            | 5.215        | 0.009            | Overexpressed in FP versus FN |
| SLC27A6   | 2.813            | 0.610        | 0.019            | Overexpressed in FP versus FN |
| ZNF91     | 1.011            | 4.318        | 0.010            | Overexpressed in FP versus FN |
| JPH3      | 1.591            | 0.896        | 0.019            | Overexpressed in FP versus FN |
| HS3ST3B1  | 1.602            | 1.587        | 0.017            | Overexpressed in FP versus FN |
| SPATA22   | 2.081            | -0.707       | 0.022            | Overexpressed in FP versus FN |
| LOC283070 | 1.018            | 3.551        | 0.012            | Overexpressed in FP versus FN |
| SCARA5    | 2.000            | 3.422        | 0.013            | Overexpressed in FP versus FN |
| CPNE9     | 1.474            | -0.987       | 0.023            | Overexpressed in FP versus FN |
| BEX1      | 1.866            | 2.570        | 0.015            | Overexpressed in FP versus FN |
| RYR1      | 1.169            | 9.635        | 0.014            | Overexpressed in FP versus FN |
| NSUN7     | 1.485            | 1.086        | 0.020            | Overexpressed in FP versus FN |
| UNQ6975   | 1.371            | 2.350        | 0.016            | Overexpressed in FP versus FN |
| PCDHGB5   | 1.420            | -0.162       | 0.023            | Overexpressed in FP versus FN |
| CHRNE     | 1.290            | 1.352        | 0.019            | Overexpressed in FP versus FN |
| RBP1      | 1.281            | 6.876        | 0.011            | Overexpressed in FP versus FN |
| ART3      | 1.700            | 1.158        | 0.020            | Overexpressed in FP versus FN |
| NTRK3     | 1.959            | 3.441        | 0.014            | Overexpressed in FP versus FN |
| AASS      | 1.260            | 5.669        | 0.010            | Overexpressed in FP versus FN |
| EPHA7     | 1.958            | 4.238        | 0.012            | Overexpressed in FP versus FN |
| AQP3      | 1.174            | 3.646        | 0.013            | Overexpressed in FP versus FN |
| LDHD      | 1.298            | 0.489        | 0.023            | Overexpressed in FP versus FN |
| SP5       | 3.173            | 0.905        | 0.022            | Overexpressed in FP versus FN |
| CSMD1     | 1.778            | 4.157        | 0.013            | Overexpressed in FP versus FN |

## Supplementary Table 10 (continued)

| Symbol   | Log2.Fold.Change | Log2.AveExpr | Adjusted.P.value | Category                      |
|----------|------------------|--------------|------------------|-------------------------------|
| HYDIN    | 1.768            | 1.686        | 0.020            | Overexpressed in FP versus FN |
| SAMD11   | 1.478            | 2.982        | 0.016            | Overexpressed in FP versus FN |
| MB       | 2.008            | 2.321        | 0.018            | Overexpressed in FP versus FN |
| P2RX1    | 1.504            | 2.106        | 0.019            | Overexpressed in FP versus FN |
| EPHB1    | 1.520            | 3.509        | 0.015            | Overexpressed in FP versus FN |
| MASP1    | 2.191            | -1.180       | 0.028            | Overexpressed in FP versus FN |
| PELI2    | 1.099            | 4.097        | 0.013            | Overexpressed in FP versus FN |
| DEGS2    | 1.518            | 0.377        | 0.025            | Overexpressed in FP versus FN |
| KCNG3    | 1.845            | -0.324       | 0.026            | Overexpressed in FP versus FN |
| LHFPL4   | 2.241            | -1.537       | 0.029            | Overexpressed in FP versus FN |
| P2RY2    | 1.588            | -0.659       | 0.028            | Overexpressed in FP versus FN |
| MUC2     | 2.916            | -1.301       | 0.029            | Overexpressed in FP versus FN |
| LTBP2    | 1.054            | 6.685        | 0.012            | Overexpressed in FP versus FN |
| FIGN     | 1.837            | 0.390        | 0.026            | Overexpressed in FP versus FN |
| FNDC5    | 1.079            | 8.832        | 0.016            | Overexpressed in FP versus FN |
| TRPC1    | 1.174            | 2.840        | 0.018            | Overexpressed in FP versus FN |
| SLC22A31 | 1.051            | 2.037        | 0.022            | Overexpressed in FP versus FN |
| PLN      | 1.143            | 0.898        | 0.026            | Overexpressed in FP versus FN |
| ISL1     | 2.336            | 2.353        | 0.021            | Overexpressed in FP versus FN |
| TIGD3    | 1.162            | 1.674        | 0.023            | Overexpressed in FP versus FN |
| NMRK2    | 2.233            | 0.606        | 0.027            | Overexpressed in FP versus FN |
| ANKRD2   | 2.054            | 1.463        | 0.024            | Overexpressed in FP versus FN |
| CRHR1    | 2.077            | -2.290       | 0.033            | Overexpressed in FP versus FN |
| GRIK2    | 2.010            | -0.321       | 0.030            | Overexpressed in FP versus FN |
| CDKN1C   | 1.432            | 5.795        | 0.013            | Overexpressed in FP versus FN |

## Supplementary Table 10 (continued)

| Symbol    | Log2.Fold.Change | Log2.AveExpr | Adjusted.P.value | Category                      |
|-----------|------------------|--------------|------------------|-------------------------------|
| PRR7      | 1.065            | 2.213        | 0.022            | Overexpressed in FP versus FN |
| P2RX5     | 1.500            | 1.358        | 0.025            | Overexpressed in FP versus FN |
| PIP5K1B   | 1.229            | 0.437        | 0.028            | Overexpressed in FP versus FN |
| DPF3      | 1.399            | -0.186       | 0.030            | Overexpressed in FP versus FN |
| IRAK3     | 1.493            | 4.944        | 0.013            | Overexpressed in FP versus FN |
| LOC400680 | 1.756            | 0.362        | 0.029            | Overexpressed in FP versus FN |
| HYLS1     | 1.176            | 2.267        | 0.022            | Overexpressed in FP versus FN |
| C14orf39  | 1.378            | 3.234        | 0.018            | Overexpressed in FP versus FN |
| CKMT2     | 1.562            | 2.611        | 0.021            | Overexpressed in FP versus FN |
| TTN       | 1.641            | 8.504        | 0.018            | Overexpressed in FP versus FN |
| S100B     | 2.240            | 0.944        | 0.028            | Overexpressed in FP versus FN |
| PKD2L1    | 1.623            | -0.137       | 0.032            | Overexpressed in FP versus FN |
| CELF4     | 1.138            | 1.675        | 0.025            | Overexpressed in FP versus FN |
| MCF2L2    | 1.369            | 0.171        | 0.031            | Overexpressed in FP versus FN |
| DSCAM     | 2.293            | 1.998        | 0.024            | Overexpressed in FP versus FN |
| RPL27     | 1.055            | 9.135        | 0.019            | Overexpressed in FP versus FN |
| MME       | 2.332            | 2.708        | 0.022            | Overexpressed in FP versus FN |
| PADI2     | 1.319            | 3.282        | 0.019            | Overexpressed in FP versus FN |
| PRKAG3    | 1.911            | 1.446        | 0.027            | Overexpressed in FP versus FN |
| CLDN19    | 1.861            | -0.821       | 0.034            | Overexpressed in FP versus FN |
| SLC6A11   | 2.395            | -3.367       | 0.039            | Overexpressed in FP versus FN |
| ZNF876P   | 1.265            | 0.879        | 0.029            | Overexpressed in FP versus FN |
| FAM19A5   | 1.225            | 3.895        | 0.018            | Overexpressed in FP versus FN |
| HCG27     | 1.429            | -0.053       | 0.034            | Overexpressed in FP versus FN |
| HHATL     | 1.407            | 1.255        | 0.029            | Overexpressed in FP versus FN |



## Supplementary Table 10 (continued)

| Symbol    | Log2.Fold.Change | Log2.AveExpr | Adjusted.P.value | Category                      |
|-----------|------------------|--------------|------------------|-------------------------------|
| PPP1R17   | 2.558            | -3.801       | 0.043            | Overexpressed in FP versus FN |
| SATB2     | 1.464            | 3.847        | 0.019            | Overexpressed in FP versus FN |
| LRRC4     | 1.116            | 3.138        | 0.022            | Overexpressed in FP versus FN |
| SPOCK3    | 3.149            | 1.550        | 0.030            | Overexpressed in FP versus FN |
| LOC642366 | 2.140            | 2.434        | 0.026            | Overexpressed in FP versus FN |
| ANKRD29   | 1.554            | 1.436        | 0.031            | Overexpressed in FP versus FN |
| FGF12     | 1.193            | 0.810        | 0.033            | Overexpressed in FP versus FN |
| MANEAL    | 1.375            | 2.025        | 0.028            | Overexpressed in FP versus FN |
| MYO16     | 2.147            | 2.756        | 0.025            | Overexpressed in FP versus FN |
| DMBT1     | 2.357            | -2.338       | 0.045            | Overexpressed in FP versus FN |
| RRAD      | 1.350            | 1.120        | 0.033            | Overexpressed in FP versus FN |
| VAT1L     | 2.069            | -0.334       | 0.040            | Overexpressed in FP versus FN |
| IRX4      | 2.159            | -1.144       | 0.044            | Overexpressed in FP versus FN |
| RBM20     | 1.055            | 4.992        | 0.018            | Overexpressed in FP versus FN |
| CSRP3     | 2.701            | 1.404        | 0.033            | Overexpressed in FP versus FN |
| OCLN      | 1.453            | -0.145       | 0.041            | Overexpressed in FP versus FN |
| FSTL4     | 1.484            | 2.091        | 0.031            | Overexpressed in FP versus FN |
| ADAMTS16  | 1.468            | 1.803        | 0.033            | Overexpressed in FP versus FN |
| KCNC1     | 1.438            | 3.127        | 0.026            | Overexpressed in FP versus FN |
| PAK3      | 1.116            | 2.255        | 0.031            | Overexpressed in FP versus FN |
| LOC441666 | 1.873            | 2.013        | 0.033            | Overexpressed in FP versus FN |
| MYT1L     | 1.297            | 1.258        | 0.037            | Overexpressed in FP versus FN |
| TENM2     | 1.979            | 1.565        | 0.036            | Overexpressed in FP versus FN |
| DDIT3     | 1.068            | 4.738        | 0.020            | Overexpressed in FP versus FN |
| TOX2      | 1.141            | 3.020        | 0.028            | Overexpressed in FP versus FN |

## Supplementary Table 10 (continued)

| Symbol       | Log2.Fold.Change | Log2.AveExpr | Adjusted.P.value | Category                      |
|--------------|------------------|--------------|------------------|-------------------------------|
| ASPA         | 1.332            | 0.330        | 0.045            | Overexpressed in FP versus FN |
| COBLL1       | 1.381            | 3.154        | 0.029            | Overexpressed in FP versus FN |
| TRIM36       | 1.365            | 4.143        | 0.024            | Overexpressed in FP versus FN |
| FBXL16       | 1.394            | 1.869        | 0.038            | Overexpressed in FP versus FN |
| GPR17        | 1.146            | 0.414        | 0.047            | Overexpressed in FP versus FN |
| ACTC1        | 1.356            | 10.162       | 0.033            | Overexpressed in FP versus FN |
| NDUFS5       | 1.046            | 7.290        | 0.023            | Overexpressed in FP versus FN |
| CADM2        | 1.116            | 5.388        | 0.021            | Overexpressed in FP versus FN |
| SBK2         | 1.527            | 2.835        | 0.033            | Overexpressed in FP versus FN |
| WHAMMP2      | 1.178            | 0.523        | 0.049            | Overexpressed in FP versus FN |
| MYT1         | 2.238            | 0.494        | 0.049            | Overexpressed in FP versus FN |
| C1QTNF3      | 1.189            | 6.232        | 0.022            | Overexpressed in FP versus FN |
| WNT10A       | 1.402            | 2.176        | 0.038            | Overexpressed in FP versus FN |
| MKRN3        | 1.739            | 2.366        | 0.038            | Overexpressed in FP versus FN |
| HSPA1B       | 1.169            | 5.548        | 0.023            | Overexpressed in FP versus FN |
| CLSTN2       | 1.135            | 4.137        | 0.028            | Overexpressed in FP versus FN |
| MSI1         | 1.121            | 4.051        | 0.028            | Overexpressed in FP versus FN |
| CACNG6       | 1.966            | 3.133        | 0.035            | Overexpressed in FP versus FN |
| EPS8L2       | 1.029            | 3.205        | 0.034            | Overexpressed in FP versus FN |
| LOC100505738 | 1.335            | 2.623        | 0.039            | Overexpressed in FP versus FN |
| OXER1        | 1.680            | 4.506        | 0.028            | Overexpressed in FP versus FN |
| PPP1R3C      | 1.142            | 3.655        | 0.032            | Overexpressed in FP versus FN |
| NLGN1        | 1.454            | 2.049        | 0.045            | Overexpressed in FP versus FN |
| HRH1         | 1.120            | 2.590        | 0.041            | Overexpressed in FP versus FN |
| KIF5C        | 1.545            | 2.280        | 0.044            | Overexpressed in FP versus FN |

### Supplementary Table 10 (continued)

| Symbol       | Log2.Fold.Change | Log2.AveExpr | Adjusted.P.value | Category                       |
|--------------|------------------|--------------|------------------|--------------------------------|
| LRFN5        | 1.474            | 3.527        | 0.035            | Overexpressed in FP versus FN  |
| TFAP2A       | 1.730            | 3.803        | 0.034            | Overexpressed in FP versus FN  |
| KY           | 2.200            | 2.829        | 0.041            | Overexpressed in FP versus FN  |
| ABCA7        | 1.031            | 4.844        | 0.028            | Overexpressed in FP versus FN  |
| CXCR7        | 1.203            | 5.425        | 0.028            | Overexpressed in FP versus FN  |
| SECTM1       | 1.036            | 2.857        | 0.043            | Overexpressed in FP versus FN  |
| APOBEC2      | 1.619            | 3.515        | 0.039            | Overexpressed in FP versus FN  |
| MEG3         | 1.850            | 9.839        | 0.047            | Overexpressed in FP versus FN  |
| LOC100505806 | 1.244            | 3.168        | 0.048            | Overexpressed in FP versus FN  |
| CYP27C1      | 1.032            | 3.539        | 0.044            | Overexpressed in FP versus FN  |
| ZNF418       | 1.001            | 3.474        | 0.047            | Overexpressed in FP versus FN  |
| KREMEN2      | 1.040            | 6.081        | 0.035            | Overexpressed in FP versus FN  |
| ENPP6        | 1.654            | 4.073        | 0.044            | Overexpressed in FP versus FN  |
| RBMS3        | -2.729           | 4.587        | 0.000            | Underexpressed in FP versus FN |
| FZD4         | -2.294           | 5.996        | 0.000            | Underexpressed in FP versus FN |
| PSD3         | -2.673           | 5.417        | 0.000            | Underexpressed in FP versus FN |
| KIF16B       | -3.213           | 3.596        | 0.000            | Underexpressed in FP versus FN |
| PLK2         | -2.593           | 5.957        | 0.000            | Underexpressed in FP versus FN |
| GRTP1        | -3.619           | 0.940        | 0.000            | Underexpressed in FP versus FN |
| ZFHX4        | -4.236           | 4.676        | 0.000            | Underexpressed in FP versus FN |
| NBN          | -1.091           | 5.711        | 0.000            | Underexpressed in FP versus FN |
| EBF3         | -2.227           | 6.175        | 0.000            | Underexpressed in FP versus FN |
| KAZN         | -3.436           | 4.262        | 0.000            | Underexpressed in FP versus FN |
| SEMA3A       | -4.660           | 3.821        | 0.000            | Underexpressed in FP versus FN |
| EMILIN1      | -2.505           | 7.106        | 0.000            | Underexpressed in FP versus FN |

## Supplementary Table 10 (continued)

| Symbol    | Log2.Fold.Change | Log2.AveExpr | Adjusted.P.value | Category                       |
|-----------|------------------|--------------|------------------|--------------------------------|
| PPAPDC1B  | -1.336           | 5.611        | 0                | Underexpressed in FP versus FN |
| LOC344595 | -2.251           | 4.292        | 0                | Underexpressed in FP versus FN |
| TRIB2     | -2.172           | 7.045        | 0                | Underexpressed in FP versus FN |
| TRERF1    | -1.930           | 4.167        | 0                | Underexpressed in FP versus FN |
| ADAMTS9   | -3.015           | 4.936        | 0                | Underexpressed in FP versus FN |
| ZFP36L2   | -1.593           | 7.124        | 0                | Underexpressed in FP versus FN |
| LPHN1     | -2.448           | 5.120        | 0                | Underexpressed in FP versus FN |
| GPX8      | -2.116           | 5.479        | 0                | Underexpressed in FP versus FN |
| FBN2      | -4.802           | 5.141        | 0                | Underexpressed in FP versus FN |
| SLC1A3    | -3.468           | 4.083        | 0                | Underexpressed in FP versus FN |
| LIMA1     | -1.469           | 6.726        | 0                | Underexpressed in FP versus FN |
| MAP2K6    | -2.283           | 1.698        | 0                | Underexpressed in FP versus FN |
| SOBP      | -2.380           | 4.040        | 0                | Underexpressed in FP versus FN |
| ADA       | -2.072           | 3.770        | 0                | Underexpressed in FP versus FN |
| SLC25A32  | -1.028           | 4.895        | 0                | Underexpressed in FP versus FN |
| GLIS2     | -1.455           | 5.481        | 0                | Underexpressed in FP versus FN |
| STK33     | -3.048           | 2.407        | 0                | Underexpressed in FP versus FN |
| EXT1      | -1.228           | 5.622        | 0                | Underexpressed in FP versus FN |
| CLMP      | -4.005           | 2.639        | 0                | Underexpressed in FP versus FN |
| DOCK11    | -1.998           | 4.365        | 0                | Underexpressed in FP versus FN |
| GXYLT1    | -1.423           | 5.281        | 0                | Underexpressed in FP versus FN |
| RRBP1     | -1.640           | 7.277        | 0                | Underexpressed in FP versus FN |
| DLC1      | -1.945           | 5.857        | 0                | Underexpressed in FP versus FN |
| PCDH18    | -2.514           | 5.052        | 0                | Underexpressed in FP versus FN |
| SYNGAP1   | -1.154           | 5.203        | 0                | Underexpressed in FP versus FN |

## Supplementary Table 10 (continued)

| Symbol     | Log2.Fold.Change | Log2.AveExpr | Adjusted.P.value | Category                       |
|------------|------------------|--------------|------------------|--------------------------------|
| SLC39A14   | -1.416           | 5.446        | 0                | Underexpressed in FP versus FN |
| RGL1       | -2.025           | 4.606        | 0                | Underexpressed in FP versus FN |
| FBLN1      | -2.095           | 7.203        | 0                | Underexpressed in FP versus FN |
| OAF        | -2.551           | 5.960        | 0                | Underexpressed in FP versus FN |
| FZD7       | -2.002           | 5.109        | 0                | Underexpressed in FP versus FN |
| CREB5      | -3.153           | 4.686        | 0                | Underexpressed in FP versus FN |
| PDP1       | -1.079           | 4.855        | 0                | Underexpressed in FP versus FN |
| SOX6       | -2.791           | 4.281        | 0                | Underexpressed in FP versus FN |
| GPR124     | -1.887           | 6.774        | 0                | Underexpressed in FP versus FN |
| ASAP1      | -1.094           | 6.772        | 0                | Underexpressed in FP versus FN |
| COL27A1    | -2.529           | 5.002        | 0                | Underexpressed in FP versus FN |
| SLC39A11   | -1.519           | 3.222        | 0                | Underexpressed in FP versus FN |
| DOK1       | -1.458           | 4.000        | 0                | Underexpressed in FP versus FN |
| LTBP4      | -2.855           | 7.066        | 0                | Underexpressed in FP versus FN |
| AP5B1      | -1.640           | 3.471        | 0                | Underexpressed in FP versus FN |
| TIPARP     | -1.613           | 4.324        | 0                | Underexpressed in FP versus FN |
| TCF4       | -1.212           | 7.798        | 0                | Underexpressed in FP versus FN |
| ENTPD4     | -1.173           | 6.635        | 0                | Underexpressed in FP versus FN |
| CDC42EP4   | -2.018           | 4.307        | 0                | Underexpressed in FP versus FN |
| ST6GALNAC3 | -2.455           | 2.111        | 0                | Underexpressed in FP versus FN |
| C17orf67   | -2.261           | 1.769        | 0                | Underexpressed in FP versus FN |
| FAM110B    | -1.629           | 5.640        | 0                | Underexpressed in FP versus FN |
| FANCF      | -1.352           | 3.864        | 0                | Underexpressed in FP versus FN |
| RNF144A    | -1.333           | 5.541        | 0                | Underexpressed in FP versus FN |
| MMP2       | -2.583           | 7.265        | 0                | Underexpressed in FP versus FN |

## Supplementary Table 10 (continued)

| Symbol    | Log2.Fold.Change | Log2.AveExpr | Adjusted.P.value | Category                       |
|-----------|------------------|--------------|------------------|--------------------------------|
| FNDC3B    | -1.331           | 6.123        | 0                | Underexpressed in FP versus FN |
| ZFHx4-AS1 | -4.552           | 0.013        | 0                | Underexpressed in FP versus FN |
| TMTC2     | -2.510           | 4.310        | 0                | Underexpressed in FP versus FN |
| SCN7A     | -5.456           | 3.413        | 0                | Underexpressed in FP versus FN |
| LRRC1     | -1.627           | 3.525        | 0                | Underexpressed in FP versus FN |
| ITM2A     | -4.037           | 5.277        | 0                | Underexpressed in FP versus FN |
| MOB3B     | -2.004           | 2.994        | 0                | Underexpressed in FP versus FN |
| LAMA2     | -2.353           | 5.839        | 0                | Underexpressed in FP versus FN |
| LBX2      | -3.517           | -0.364       | 0                | Underexpressed in FP versus FN |
| SCML2     | -2.251           | 3.362        | 0                | Underexpressed in FP versus FN |
| HSPA12B   | -2.664           | 4.066        | 0                | Underexpressed in FP versus FN |
| PAX7      | -4.293           | 5.661        | 0                | Underexpressed in FP versus FN |
| SVIP      | -2.162           | 2.073        | 0                | Underexpressed in FP versus FN |
| FMNL3     | -1.069           | 6.504        | 0                | Underexpressed in FP versus FN |
| HOXC5     | -2.391           | 1.452        | 0                | Underexpressed in FP versus FN |
| STK39     | -1.008           | 4.683        | 0                | Underexpressed in FP versus FN |
| GRASP     | -1.414           | 3.789        | 0                | Underexpressed in FP versus FN |
| LPAR4     | -3.786           | 2.281        | 0                | Underexpressed in FP versus FN |
| LDOC1     | -2.360           | 4.182        | 0                | Underexpressed in FP versus FN |
| EDA       | -2.469           | 4.138        | 0                | Underexpressed in FP versus FN |
| KAZALD1   | -3.016           | 3.712        | 0                | Underexpressed in FP versus FN |
| COL19A1   | -4.589           | 3.266        | 0                | Underexpressed in FP versus FN |
| SPRED2    | -1.422           | 6.097        | 0                | Underexpressed in FP versus FN |
| TMEM155   | -4.048           | -0.273       | 0                | Underexpressed in FP versus FN |
| LOXL3     | -1.747           | 4.411        | 0                | Underexpressed in FP versus FN |

## Supplementary Table 10 (continued)

| Symbol       | Log2.Fold.Change | Log2.AveExpr | Adjusted.P.value | Category                       |
|--------------|------------------|--------------|------------------|--------------------------------|
| AR SJ        | -2.956           | 2.255        | 0                | Underexpressed in FP versus FN |
| KIAA1598     | -2.481           | 3.936        | 0                | Underexpressed in FP versus FN |
| GALNT2       | -1.285           | 7.101        | 0                | Underexpressed in FP versus FN |
| TSHZ1        | -1.181           | 5.930        | 0                | Underexpressed in FP versus FN |
| SH3PXD2B     | -1.198           | 6.031        | 0                | Underexpressed in FP versus FN |
| FBXO17       | -2.048           | 4.875        | 0                | Underexpressed in FP versus FN |
| TSKU         | -1.583           | 5.135        | 0                | Underexpressed in FP versus FN |
| MAPK12       | -1.801           | 4.162        | 0                | Underexpressed in FP versus FN |
| MFAP2        | -2.225           | 5.327        | 0                | Underexpressed in FP versus FN |
| C1orf21      | -1.625           | 5.009        | 0                | Underexpressed in FP versus FN |
| FBXL21       | -7.783           | -1.964       | 0                | Underexpressed in FP versus FN |
| WWC3         | -1.064           | 5.482        | 0                | Underexpressed in FP versus FN |
| KCTD12       | -2.025           | 6.936        | 0                | Underexpressed in FP versus FN |
| PGRMC1       | -1.126           | 6.145        | 0                | Underexpressed in FP versus FN |
| PHLDA1       | -1.927           | 6.467        | 0                | Underexpressed in FP versus FN |
| ASAP3        | -1.782           | 5.079        | 0                | Underexpressed in FP versus FN |
| SEMA3B       | -1.744           | 5.824        | 0                | Underexpressed in FP versus FN |
| LINC00085    | -2.043           | 3.978        | 0                | Underexpressed in FP versus FN |
| FRMD6        | -1.550           | 5.228        | 0                | Underexpressed in FP versus FN |
| LRRCC1       | -1.336           | 4.261        | 0                | Underexpressed in FP versus FN |
| GALNT10      | -1.809           | 5.646        | 0                | Underexpressed in FP versus FN |
| LHX6         | -3.170           | 2.128        | 0                | Underexpressed in FP versus FN |
| KAT6A        | -1.006           | 6.611        | 0                | Underexpressed in FP versus FN |
| RAMP2-AS1    | -2.824           | 1.761        | 0                | Underexpressed in FP versus FN |
| LOC100302640 | -2.485           | 0.412        | 0                | Underexpressed in FP versus FN |

## Supplementary Table 10 (continued)

| Symbol   | Log2.Fold.Change | Log2.AveExpr | Adjusted.P.value | Category                       |
|----------|------------------|--------------|------------------|--------------------------------|
| LHFPL2   | -1.074           | 6.026        | 0                | Underexpressed in FP versus FN |
| LRP5L    | -1.201           | 4.077        | 0                | Underexpressed in FP versus FN |
| PRICKLE1 | -2.198           | 4.476        | 0                | Underexpressed in FP versus FN |
| TBX3     | -2.168           | 4.761        | 0                | Underexpressed in FP versus FN |
| IL13RA1  | -1.564           | 5.067        | 0                | Underexpressed in FP versus FN |
| SIPA1L2  | -1.734           | 4.503        | 0                | Underexpressed in FP versus FN |
| PLEKHG2  | -1.110           | 6.839        | 0                | Underexpressed in FP versus FN |
| CCDC54   | -4.277           | -0.685       | 0                | Underexpressed in FP versus FN |
| MUSK     | -2.683           | 2.082        | 0                | Underexpressed in FP versus FN |
| LPAR1    | -2.660           | 4.171        | 0                | Underexpressed in FP versus FN |
| ALPK1    | -1.664           | 3.131        | 0                | Underexpressed in FP versus FN |
| ARHGAP28 | -1.975           | 4.780        | 0                | Underexpressed in FP versus FN |
| LAMB1    | -1.405           | 8.418        | 0                | Underexpressed in FP versus FN |
| DUSP4    | -1.973           | 5.437        | 0                | Underexpressed in FP versus FN |
| CTDSPL   | -1.066           | 5.121        | 0                | Underexpressed in FP versus FN |
| BMPR1B   | -3.221           | 3.122        | 0                | Underexpressed in FP versus FN |
| LONRF3   | -2.761           | -0.383       | 0                | Underexpressed in FP versus FN |
| GAREM    | -2.545           | 3.052        | 0                | Underexpressed in FP versus FN |
| AGRN     | -1.683           | 7.159        | 0                | Underexpressed in FP versus FN |
| BACH2    | -2.513           | 3.421        | 0                | Underexpressed in FP versus FN |
| FUT4     | -1.303           | 3.310        | 0                | Underexpressed in FP versus FN |
| ROBO3    | -2.197           | 3.978        | 0                | Underexpressed in FP versus FN |
| GLT25D2  | -4.074           | 2.282        | 0                | Underexpressed in FP versus FN |
| MAP4K2   | -1.142           | 3.798        | 0                | Underexpressed in FP versus FN |
| EGFR     | -3.320           | 3.581        | 0                | Underexpressed in FP versus FN |



## Supplementary Table 10 (continued)

| Symbol   | Log2.Fold.Change | Log2.AveExpr | Adjusted.P.value | Category                       |
|----------|------------------|--------------|------------------|--------------------------------|
| ARL4A    | -1.944           | 3.413        | 0                | Underexpressed in FP versus FN |
| GPR162   | -2.111           | 3.673        | 0                | Underexpressed in FP versus FN |
| ARHGEF40 | -1.135           | 6.683        | 0                | Underexpressed in FP versus FN |
| ANKRD50  | -1.024           | 5.996        | 0                | Underexpressed in FP versus FN |
| TRPS1    | -2.616           | 4.487        | 0                | Underexpressed in FP versus FN |
| RCOR2    | -1.711           | 5.508        | 0                | Underexpressed in FP versus FN |
| KCNK5    | -2.548           | 2.934        | 0                | Underexpressed in FP versus FN |
| GRK5     | -1.214           | 4.542        | 0                | Underexpressed in FP versus FN |
| RAB3IL1  | -1.995           | 3.809        | 0                | Underexpressed in FP versus FN |
| SERTAD4  | -3.361           | 1.819        | 0                | Underexpressed in FP versus FN |
| DUSP9    | -3.639           | 0.253        | 0                | Underexpressed in FP versus FN |
| KBTBD11  | -2.032           | 4.809        | 0                | Underexpressed in FP versus FN |
| INPP4B   | -1.825           | 2.861        | 0                | Underexpressed in FP versus FN |
| NRIP3    | -2.229           | 0.930        | 0                | Underexpressed in FP versus FN |
| FAM13A   | -1.240           | 5.033        | 0                | Underexpressed in FP versus FN |
| DLG4     | -1.783           | 4.148        | 0                | Underexpressed in FP versus FN |
| PLAUR    | -1.391           | 4.097        | 0                | Underexpressed in FP versus FN |
| FAM198B  | -1.748           | 5.613        | 0                | Underexpressed in FP versus FN |
| HMGA2    | -5.417           | 5.122        | 0                | Underexpressed in FP versus FN |
| NLGN2    | -1.739           | 5.667        | 0                | Underexpressed in FP versus FN |
| NNAT     | -4.087           | 7.736        | 0                | Underexpressed in FP versus FN |
| DNM3OS   | -2.642           | 6.029        | 0                | Underexpressed in FP versus FN |
| MSC      | -1.727           | 6.924        | 0                | Underexpressed in FP versus FN |
| BMP4     | -2.746           | 3.403        | 0                | Underexpressed in FP versus FN |
| COL5A2   | -1.766           | 8.516        | 0                | Underexpressed in FP versus FN |

## Supplementary Table 10 (continued)

| Symbol   | Log2.Fold.Change | Log2.AveExpr | Adjusted.P.value | Category                       |
|----------|------------------|--------------|------------------|--------------------------------|
| LBX2-AS1 | -2.301           | 2.171        | 0                | Underexpressed in FP versus FN |
| ETV6     | -1.002           | 5.000        | 0                | Underexpressed in FP versus FN |
| LEFTY1   | -3.133           | 1.517        | 0                | Underexpressed in FP versus FN |
| NHSL1    | -1.436           | 3.863        | 0                | Underexpressed in FP versus FN |
| FREM1    | -3.459           | 3.497        | 0                | Underexpressed in FP versus FN |
| ACSS1    | -1.766           | 5.015        | 0                | Underexpressed in FP versus FN |
| KHK      | -1.795           | 1.330        | 0                | Underexpressed in FP versus FN |
| SLC1A5   | -1.499           | 5.274        | 0                | Underexpressed in FP versus FN |
| ADAMTS7  | -2.081           | 4.879        | 0                | Underexpressed in FP versus FN |
| MMP23A   | -2.198           | 2.437        | 0                | Underexpressed in FP versus FN |
| CPXM1    | -2.184           | 6.424        | 0                | Underexpressed in FP versus FN |
| MTUS1    | -1.984           | 5.339        | 0                | Underexpressed in FP versus FN |
| BCL9L    | -1.083           | 6.255        | 0                | Underexpressed in FP versus FN |
| KCNMB2   | -3.955           | 0.186        | 0                | Underexpressed in FP versus FN |
| ECEL1    | -4.190           | 0.730        | 0                | Underexpressed in FP versus FN |
| LEPREL2  | -1.782           | 5.452        | 0                | Underexpressed in FP versus FN |
| MAML2    | -2.137           | 2.839        | 0                | Underexpressed in FP versus FN |
| WLS      | -1.931           | 4.738        | 0                | Underexpressed in FP versus FN |
| CDH11    | -1.511           | 6.428        | 0                | Underexpressed in FP versus FN |
| WASF3    | -2.200           | 3.963        | 0                | Underexpressed in FP versus FN |
| TANC1    | -1.044           | 6.276        | 0                | Underexpressed in FP versus FN |
| PMP22    | -1.678           | 6.009        | 0                | Underexpressed in FP versus FN |
| IGSF3    | -1.144           | 6.141        | 0                | Underexpressed in FP versus FN |
| MTMR9LP  | -1.310           | 4.248        | 0                | Underexpressed in FP versus FN |
| FAM217B  | -1.243           | 5.418        | 0                | Underexpressed in FP versus FN |

## Supplementary Table 10 (continued)

| Symbol    | Log2.Fold.Change | Log2.AveExpr | Adjusted.P.value | Category                       |
|-----------|------------------|--------------|------------------|--------------------------------|
| FAS       | -1.416           | 3.407        | 0                | Underexpressed in FP versus FN |
| PVT1      | -1.460           | 3.650        | 0                | Underexpressed in FP versus FN |
| DGKE      | -1.572           | 3.513        | 0                | Underexpressed in FP versus FN |
| HIST3H2A  | -2.392           | 1.368        | 0                | Underexpressed in FP versus FN |
| TRIL      | -2.463           | 6.114        | 0                | Underexpressed in FP versus FN |
| LRCH1     | -1.059           | 5.239        | 0                | Underexpressed in FP versus FN |
| CACNA1G   | -3.612           | 3.581        | 0                | Underexpressed in FP versus FN |
| S1PR2     | -2.022           | 3.388        | 0                | Underexpressed in FP versus FN |
| ZIC1      | -2.008           | 5.962        | 0                | Underexpressed in FP versus FN |
| EPB41L2   | -1.100           | 7.233        | 0                | Underexpressed in FP versus FN |
| RNF135    | -1.300           | 3.210        | 0                | Underexpressed in FP versus FN |
| SELENBP1  | -1.462           | 4.374        | 0                | Underexpressed in FP versus FN |
| CD44      | -1.511           | 6.278        | 0                | Underexpressed in FP versus FN |
| RGMA      | -1.434           | 6.244        | 0                | Underexpressed in FP versus FN |
| TWSG1     | -1.192           | 6.150        | 0                | Underexpressed in FP versus FN |
| RAB11FIP1 | -1.379           | 4.478        | 0                | Underexpressed in FP versus FN |
| BMP1      | -1.153           | 7.040        | 0                | Underexpressed in FP versus FN |
| LEPREL4   | -1.072           | 5.653        | 0                | Underexpressed in FP versus FN |
| BCL9      | -1.064           | 5.972        | 0                | Underexpressed in FP versus FN |
| SDC1      | -2.575           | 4.662        | 0                | Underexpressed in FP versus FN |
| KATNAL2   | -1.189           | 2.900        | 0                | Underexpressed in FP versus FN |
| ASNS      | -1.189           | 5.216        | 0                | Underexpressed in FP versus FN |
| KLF11     | -1.223           | 4.348        | 0                | Underexpressed in FP versus FN |
| SEC11C    | -1.491           | 3.600        | 0                | Underexpressed in FP versus FN |
| LEFTY2    | -3.074           | 1.333        | 0                | Underexpressed in FP versus FN |

## Supplementary Table 10 (continued)

| Symbol    | Log2.Fold.Change | Log2.AveExpr | Adjusted.P.value | Category                       |
|-----------|------------------|--------------|------------------|--------------------------------|
| DDAH1     | -1.885           | 4.736        | 0                | Underexpressed in FP versus FN |
| NCOA2     | -1.956           | 4.060        | 0                | Underexpressed in FP versus FN |
| FOXP2     | -2.351           | 4.221        | 0                | Underexpressed in FP versus FN |
| ARHGAP29  | -1.428           | 5.746        | 0                | Underexpressed in FP versus FN |
| MAST3     | -1.154           | 4.424        | 0                | Underexpressed in FP versus FN |
| PLEKHG4   | -2.533           | 4.200        | 0                | Underexpressed in FP versus FN |
| C20orf96  | -1.264           | 4.692        | 0                | Underexpressed in FP versus FN |
| TMEM65    | -1.078           | 4.869        | 0                | Underexpressed in FP versus FN |
| HOXC13    | -5.438           | -0.443       | 0                | Underexpressed in FP versus FN |
| TRAM1     | -1.049           | 7.300        | 0                | Underexpressed in FP versus FN |
| IRS1      | -1.144           | 5.870        | 0                | Underexpressed in FP versus FN |
| ZSCAN5A   | -1.100           | 1.996        | 0                | Underexpressed in FP versus FN |
| LPCAT2    | -1.733           | 3.055        | 0                | Underexpressed in FP versus FN |
| TRIM17    | -2.043           | 0.587        | 0                | Underexpressed in FP versus FN |
| GLT8D2    | -2.304           | 4.634        | 0                | Underexpressed in FP versus FN |
| SRGAP3    | -1.649           | 4.148        | 0                | Underexpressed in FP versus FN |
| RARG      | -1.413           | 4.434        | 0                | Underexpressed in FP versus FN |
| HOXC6     | -2.760           | 3.552        | 0                | Underexpressed in FP versus FN |
| LINC00622 | -1.889           | 2.015        | 0                | Underexpressed in FP versus FN |
| TLX2      | -4.536           | -2.321       | 0                | Underexpressed in FP versus FN |
| HOXC12    | -5.450           | -2.950       | 0                | Underexpressed in FP versus FN |
| DCAF13P3  | -1.003           | 2.418        | 0                | Underexpressed in FP versus FN |
| TRPV4     | -1.614           | 2.307        | 0                | Underexpressed in FP versus FN |
| PIK3R1    | -1.022           | 5.981        | 0                | Underexpressed in FP versus FN |
| NRXN2     | -2.626           | 3.393        | 0                | Underexpressed in FP versus FN |

### Supplementary Table 10 (continued)

| Symbol      | Log2.Fold.Change | Log2.AveExpr | Adjusted.P.value | Category                       |
|-------------|------------------|--------------|------------------|--------------------------------|
| RCBTB2      | -1.140           | 5.517        | 0                | Underexpressed in FP versus FN |
| IGF2BP1     | -4.674           | 4.999        | 0                | Underexpressed in FP versus FN |
| AMPD2       | -1.234           | 6.380        | 0                | Underexpressed in FP versus FN |
| SCN2B       | -4.182           | -0.877       | 0                | Underexpressed in FP versus FN |
| PDE4B       | -2.498           | 3.778        | 0                | Underexpressed in FP versus FN |
| VCAN        | -1.922           | 8.152        | 0                | Underexpressed in FP versus FN |
| SHISA2      | -2.282           | 5.557        | 0                | Underexpressed in FP versus FN |
| SERTAD4-AS1 | -1.924           | 0.487        | 0                | Underexpressed in FP versus FN |
| SHISA5      | -1.274           | 5.772        | 0                | Underexpressed in FP versus FN |
| CCIN        | -2.997           | 1.551        | 0                | Underexpressed in FP versus FN |
| AHCYL2      | -1.229           | 4.454        | 0                | Underexpressed in FP versus FN |
| CRISPLD1    | -3.537           | 4.134        | 0                | Underexpressed in FP versus FN |
| PIWIL4      | -1.669           | 1.697        | 0                | Underexpressed in FP versus FN |
| MC4R        | -4.453           | -1.246       | 0                | Underexpressed in FP versus FN |
| LOC729950   | -2.611           | 0.127        | 0                | Underexpressed in FP versus FN |
| FZD1        | -1.173           | 5.305        | 0                | Underexpressed in FP versus FN |
| GULP1       | -2.439           | 3.039        | 0                | Underexpressed in FP versus FN |
| LRRC3B      | -2.245           | 1.879        | 0                | Underexpressed in FP versus FN |
| MSTN        | -2.677           | 5.285        | 0                | Underexpressed in FP versus FN |
| LPPR2       | -1.504           | 4.094        | 0                | Underexpressed in FP versus FN |
| ENDOD1      | -1.250           | 4.435        | 0                | Underexpressed in FP versus FN |
| HERC5       | -2.399           | 3.360        | 0                | Underexpressed in FP versus FN |
| ITPRIP      | -1.395           | 4.299        | 0                | Underexpressed in FP versus FN |
| NOTCH3      | -1.243           | 8.401        | 0                | Underexpressed in FP versus FN |
| ITGA9       | -1.933           | 2.807        | 0                | Underexpressed in FP versus FN |

## Supplementary Table 10 (continued)

| Symbol  | Log2.Fold.Change | Log2.AveExpr | Adjusted.P.value | Category                       |
|---------|------------------|--------------|------------------|--------------------------------|
| CTF1    | -1.651           | 1.379        | 0                | Underexpressed in FP versus FN |
| FAM66C  | -2.148           | 0.451        | 0                | Underexpressed in FP versus FN |
| CPVL    | -1.655           | 4.386        | 0                | Underexpressed in FP versus FN |
| HIF3A   | -2.851           | 5.685        | 0                | Underexpressed in FP versus FN |
| SLC16A9 | -3.001           | 3.919        | 0                | Underexpressed in FP versus FN |
| HOXD4   | -3.218           | 1.923        | 0                | Underexpressed in FP versus FN |
| ERF     | -1.094           | 5.931        | 0                | Underexpressed in FP versus FN |
| PAX9    | -3.979           | -2.704       | 0                | Underexpressed in FP versus FN |
| NDST4   | -3.723           | -0.161       | 0                | Underexpressed in FP versus FN |
| PTGER4  | -2.635           | 3.494        | 0                | Underexpressed in FP versus FN |
| ADCY1   | -2.419           | 3.385        | 0                | Underexpressed in FP versus FN |
| ROBO1   | -1.731           | 6.541        | 0                | Underexpressed in FP versus FN |
| FKBP10  | -1.172           | 7.769        | 0                | Underexpressed in FP versus FN |
| MMP23B  | -2.266           | -0.080       | 0                | Underexpressed in FP versus FN |
| GPRIN3  | -2.684           | 1.559        | 0                | Underexpressed in FP versus FN |
| LAPTM4B | -1.102           | 7.531        | 0                | Underexpressed in FP versus FN |
| MATN3   | -2.228           | 1.538        | 0                | Underexpressed in FP versus FN |
| SLC1A6  | -3.688           | -1.776       | 0                | Underexpressed in FP versus FN |
| FLRT3   | -3.449           | 2.532        | 0                | Underexpressed in FP versus FN |
| WWTR1   | -1.131           | 6.604        | 0                | Underexpressed in FP versus FN |
| NYAP1   | -2.333           | 1.297        | 0                | Underexpressed in FP versus FN |
| OPLAH   | -2.011           | 3.552        | 0                | Underexpressed in FP versus FN |
| MFAP4   | -1.822           | 7.205        | 0                | Underexpressed in FP versus FN |
| NKD2    | -2.195           | 2.468        | 0                | Underexpressed in FP versus FN |
| MYRF    | -2.124           | 1.974        | 0                | Underexpressed in FP versus FN |

## Supplementary Table 10 (continued)

| Symbol       | Log2.Fold.Change | Log2.AveExpr | Adjusted.P.value | Category                       |
|--------------|------------------|--------------|------------------|--------------------------------|
| CA14         | -2.539           | 0.481        | 0                | Underexpressed in FP versus FN |
| C4orf19      | -2.464           | 0.298        | 0                | Underexpressed in FP versus FN |
| PNMA3        | -3.116           | 0.819        | 0                | Underexpressed in FP versus FN |
| BDNF         | -3.903           | -0.125       | 0                | Underexpressed in FP versus FN |
| HEY1         | -1.975           | 5.501        | 0                | Underexpressed in FP versus FN |
| PLBD1        | -1.795           | 4.289        | 0                | Underexpressed in FP versus FN |
| FBN1         | -1.240           | 7.411        | 0                | Underexpressed in FP versus FN |
| NEDD4L       | -2.128           | 5.796        | 0                | Underexpressed in FP versus FN |
| GFRA1        | -3.149           | 4.949        | 0                | Underexpressed in FP versus FN |
| TSC22D3      | -1.158           | 6.746        | 0                | Underexpressed in FP versus FN |
| RGS14        | -1.608           | 3.289        | 0                | Underexpressed in FP versus FN |
| ADAM9        | -1.028           | 6.056        | 0                | Underexpressed in FP versus FN |
| ARSI         | -1.955           | 3.433        | 0                | Underexpressed in FP versus FN |
| KCNA5        | -3.180           | -0.863       | 0                | Underexpressed in FP versus FN |
| SEMA3E       | -4.948           | -1.106       | 0                | Underexpressed in FP versus FN |
| PTN          | -4.223           | 4.662        | 0                | Underexpressed in FP versus FN |
| CADM4        | -1.813           | 4.343        | 0                | Underexpressed in FP versus FN |
| SEC16B       | -1.978           | 2.842        | 0                | Underexpressed in FP versus FN |
| LTB4R        | -1.241           | 4.047        | 0                | Underexpressed in FP versus FN |
| HOXD-AS1     | -1.949           | 2.106        | 0                | Underexpressed in FP versus FN |
| LRFN1        | -2.151           | 1.318        | 0                | Underexpressed in FP versus FN |
| RDH10        | -1.904           | 3.703        | 0                | Underexpressed in FP versus FN |
| BICC1        | -2.311           | 2.364        | 0                | Underexpressed in FP versus FN |
| ARHGAP32     | -1.406           | 5.293        | 0                | Underexpressed in FP versus FN |
| LOC100288181 | -2.593           | -0.520       | 0                | Underexpressed in FP versus FN |

## Supplementary Table 10 (continued)

| Symbol       | Log2.Fold.Change | Log2.AveExpr | Adjusted.P.value | Category                       |
|--------------|------------------|--------------|------------------|--------------------------------|
| SLC6A9       | -1.515           | 1.774        | 0                | Underexpressed in FP versus FN |
| SH3BP5       | -1.594           | 2.474        | 0                | Underexpressed in FP versus FN |
| C3orf58      | -1.311           | 5.293        | 0                | Underexpressed in FP versus FN |
| NOTCH2       | -1.173           | 7.629        | 0                | Underexpressed in FP versus FN |
| KLHL13       | -1.222           | 4.984        | 0                | Underexpressed in FP versus FN |
| BOP1         | -1.003           | 3.642        | 0                | Underexpressed in FP versus FN |
| NPPC         | -3.223           | -0.177       | 0                | Underexpressed in FP versus FN |
| PKI55        | -1.085           | 4.379        | 0                | Underexpressed in FP versus FN |
| B3GALTL      | -1.229           | 4.271        | 0                | Underexpressed in FP versus FN |
| C1QL4        | -3.539           | 1.323        | 0                | Underexpressed in FP versus FN |
| CDCA2        | -1.061           | 4.890        | 0                | Underexpressed in FP versus FN |
| FBXO43       | -2.100           | 1.930        | 0                | Underexpressed in FP versus FN |
| LIF          | -1.984           | 2.067        | 0                | Underexpressed in FP versus FN |
| SRGAP2D      | -1.252           | 1.782        | 0                | Underexpressed in FP versus FN |
| RAB32        | -1.297           | 3.716        | 0                | Underexpressed in FP versus FN |
| ENOX1        | -1.546           | 4.189        | 0                | Underexpressed in FP versus FN |
| CPA6         | -4.110           | -3.372       | 0                | Underexpressed in FP versus FN |
| GALNT13      | -3.153           | -0.621       | 0                | Underexpressed in FP versus FN |
| LOC100507373 | -1.279           | 2.197        | 0                | Underexpressed in FP versus FN |
| DLL3         | -3.081           | -0.602       | 0                | Underexpressed in FP versus FN |
| TRIM29       | -4.225           | -0.997       | 0                | Underexpressed in FP versus FN |
| OLFML3       | -1.857           | 5.387        | 0                | Underexpressed in FP versus FN |
| FAT4         | -2.532           | 3.623        | 0                | Underexpressed in FP versus FN |
| S1PR3        | -1.330           | 4.869        | 0                | Underexpressed in FP versus FN |
| RND3         | -1.569           | 6.182        | 0                | Underexpressed in FP versus FN |



## Supplementary Table 10 (continued)

| Symbol   | Log2.Fold.Change | Log2.AveExpr | Adjusted.P.value | Category                       |
|----------|------------------|--------------|------------------|--------------------------------|
| MRC2     | -1.310           | 6.983        | 0                | Underexpressed in FP versus FN |
| GLI3     | -1.157           | 6.333        | 0                | Underexpressed in FP versus FN |
| PLAG1    | -3.203           | 3.323        | 0                | Underexpressed in FP versus FN |
| GHR      | -1.839           | 3.982        | 0                | Underexpressed in FP versus FN |
| COL12A1  | -1.659           | 7.729        | 0                | Underexpressed in FP versus FN |
| RIN2     | -1.007           | 5.347        | 0                | Underexpressed in FP versus FN |
| HOXD-AS2 | -2.457           | 0.952        | 0                | Underexpressed in FP versus FN |
| IGFBP5   | -1.584           | 10.076       | 0                | Underexpressed in FP versus FN |
| COLEC12  | -2.672           | 4.125        | 0                | Underexpressed in FP versus FN |
| KIRREL2  | -4.218           | -1.586       | 0                | Underexpressed in FP versus FN |
| CPS1     | -3.399           | 1.835        | 0                | Underexpressed in FP versus FN |
| RAB27B   | -3.243           | -1.341       | 0                | Underexpressed in FP versus FN |
| PTH2R    | -3.010           | -1.233       | 0                | Underexpressed in FP versus FN |
| TMTC1    | -1.880           | 5.655        | 0                | Underexpressed in FP versus FN |
| DDR2     | -1.518           | 3.883        | 0                | Underexpressed in FP versus FN |
| FCHSD1   | -1.928           | 3.426        | 0                | Underexpressed in FP versus FN |
| OR7A5    | -3.963           | -0.981       | 0                | Underexpressed in FP versus FN |
| BNC1     | -4.794           | -0.972       | 0                | Underexpressed in FP versus FN |
| KCNE1L   | -3.615           | 0.833        | 0                | Underexpressed in FP versus FN |
| RUSC2    | -1.189           | 5.072        | 0                | Underexpressed in FP versus FN |
| TMEM45A  | -1.607           | 3.745        | 0                | Underexpressed in FP versus FN |
| MATN1    | -2.309           | 0.112        | 0                | Underexpressed in FP versus FN |
| RSAD2    | -1.931           | 2.536        | 0                | Underexpressed in FP versus FN |
| ERN1     | -1.446           | 2.031        | 0                | Underexpressed in FP versus FN |
| HHAT     | -1.176           | 3.360        | 0                | Underexpressed in FP versus FN |

## Supplementary Table 10 (continued)

| Symbol   | Log2.Fold.Change | Log2.AveExpr | Adjusted.P.value | Category                       |
|----------|------------------|--------------|------------------|--------------------------------|
| TMEM144  | -2.181           | 1.728        | 0                | Underexpressed in FP versus FN |
| LRP1     | -1.384           | 8.367        | 0                | Underexpressed in FP versus FN |
| UNC5D    | -4.270           | -1.745       | 0                | Underexpressed in FP versus FN |
| CSRNP3   | -3.598           | 2.705        | 0                | Underexpressed in FP versus FN |
| FKBP5    | -1.387           | 5.207        | 0                | Underexpressed in FP versus FN |
| MACROD2  | -3.101           | 0.901        | 0                | Underexpressed in FP versus FN |
| OLFM2    | -1.861           | 5.050        | 0                | Underexpressed in FP versus FN |
| FAM43A   | -1.873           | 4.380        | 0                | Underexpressed in FP versus FN |
| IFI44    | -1.864           | 4.412        | 0                | Underexpressed in FP versus FN |
| ZNF114   | -2.936           | -0.651       | 0                | Underexpressed in FP versus FN |
| DOK6     | -2.637           | 2.224        | 0                | Underexpressed in FP versus FN |
| MANSC1   | -1.484           | 1.949        | 0                | Underexpressed in FP versus FN |
| HPSE2    | -4.855           | -0.269       | 0                | Underexpressed in FP versus FN |
| PIWIL2   | -2.645           | 0.761        | 0                | Underexpressed in FP versus FN |
| HOXC8    | -2.699           | 1.786        | 0                | Underexpressed in FP versus FN |
| CRIM1    | -1.277           | 4.827        | 0                | Underexpressed in FP versus FN |
| SNCAIP   | -3.433           | 2.331        | 0                | Underexpressed in FP versus FN |
| FLJ13197 | -1.690           | 2.211        | 0                | Underexpressed in FP versus FN |
| NMI      | -1.200           | 2.886        | 0                | Underexpressed in FP versus FN |
| FGF18    | -1.716           | 0.664        | 0                | Underexpressed in FP versus FN |
| PCSK5    | -1.962           | 2.741        | 0                | Underexpressed in FP versus FN |
| SYT1     | -3.499           | -0.057       | 0                | Underexpressed in FP versus FN |
| PRSS12   | -3.961           | 1.466        | 0                | Underexpressed in FP versus FN |
| EFNB3    | -2.365           | 1.935        | 0                | Underexpressed in FP versus FN |
| TUSC3    | -1.104           | 6.642        | 0                | Underexpressed in FP versus FN |

## Supplementary Table 10 (continued)

| Symbol       | Log2.Fold.Change | Log2.AveExpr | Adjusted.P.value | Category                       |
|--------------|------------------|--------------|------------------|--------------------------------|
| DCHS1        | -1.245           | 7.098        | 0.000            | Underexpressed in FP versus FN |
| FAM212A      | -1.428           | 1.912        | 0.000            | Underexpressed in FP versus FN |
| MDFI         | -1.642           | 6.377        | 0.000            | Underexpressed in FP versus FN |
| MGAT5B       | -2.390           | -0.025       | 0.001            | Underexpressed in FP versus FN |
| UGT3A2       | -2.787           | 0.620        | 0.001            | Underexpressed in FP versus FN |
| TBX4         | -4.098           | 1.741        | 0.001            | Underexpressed in FP versus FN |
| GPC3         | -2.023           | 7.697        | 0.000            | Underexpressed in FP versus FN |
| OPRL1        | -1.861           | 0.997        | 0.001            | Underexpressed in FP versus FN |
| GLRB         | -1.779           | 2.148        | 0.000            | Underexpressed in FP versus FN |
| MUM1L1       | -2.101           | 3.851        | 0.000            | Underexpressed in FP versus FN |
| CCL11        | -3.479           | 0.354        | 0.001            | Underexpressed in FP versus FN |
| CHRM3        | -2.509           | -0.060       | 0.001            | Underexpressed in FP versus FN |
| UNC5C        | -2.958           | 1.298        | 0.001            | Underexpressed in FP versus FN |
| LOC100506497 | -2.134           | 0.626        | 0.001            | Underexpressed in FP versus FN |
| CAMK2A       | -2.609           | 2.892        | 0.000            | Underexpressed in FP versus FN |
| BTBD3        | -1.055           | 6.331        | 0.000            | Underexpressed in FP versus FN |
| CCDC19       | -2.084           | -1.190       | 0.001            | Underexpressed in FP versus FN |
| HOXD3        | -1.970           | 1.973        | 0.001            | Underexpressed in FP versus FN |
| ADAMTS10     | -1.911           | 4.461        | 0.000            | Underexpressed in FP versus FN |
| SLC35F2      | -1.775           | 2.391        | 0.000            | Underexpressed in FP versus FN |
| EFNA3        | -1.763           | 1.068        | 0.001            | Underexpressed in FP versus FN |
| MST4         | -2.045           | 5.718        | 0.000            | Underexpressed in FP versus FN |
| HOXC11       | -4.582           | 2.168        | 0.001            | Underexpressed in FP versus FN |
| LHFP         | -1.265           | 6.386        | 0.000            | Underexpressed in FP versus FN |
| MTSS1        | -1.014           | 6.518        | 0.000            | Underexpressed in FP versus FN |

### Supplementary Table 10 (continued)

| Symbol       | Log2.Fold.Change | Log2.AveExpr | Adjusted.P.value | Category                       |
|--------------|------------------|--------------|------------------|--------------------------------|
| IGF2BP2      | -2.972           | 4.861        | 0.000            | Underexpressed in FP versus FN |
| STAC         | -2.629           | 0.881        | 0.001            | Underexpressed in FP versus FN |
| VAX1         | -5.823           | -0.249       | 0.001            | Underexpressed in FP versus FN |
| CNTNAP2      | -3.812           | -0.343       | 0.001            | Underexpressed in FP versus FN |
| CDR1         | -3.250           | -0.127       | 0.001            | Underexpressed in FP versus FN |
| BARX2        | -7.160           | 0.076        | 0.001            | Underexpressed in FP versus FN |
| PLEKHA5      | -1.136           | 4.877        | 0.000            | Underexpressed in FP versus FN |
| XPNPEP2      | -2.766           | 1.029        | 0.001            | Underexpressed in FP versus FN |
| HAS2         | -2.458           | 2.381        | 0.001            | Underexpressed in FP versus FN |
| FAM155B      | -2.711           | 0.576        | 0.001            | Underexpressed in FP versus FN |
| SPATA6       | -1.396           | 4.018        | 0.000            | Underexpressed in FP versus FN |
| NPAS3        | -3.167           | 1.148        | 0.001            | Underexpressed in FP versus FN |
| LOC100506013 | -4.756           | -3.877       | 0.001            | Underexpressed in FP versus FN |
| SLC35G1      | -1.234           | 1.562        | 0.001            | Underexpressed in FP versus FN |
| ZNF462       | -1.824           | 3.532        | 0.001            | Underexpressed in FP versus FN |
| CMPK2        | -1.514           | 2.244        | 0.001            | Underexpressed in FP versus FN |
| NID1         | -1.266           | 7.292        | 0.000            | Underexpressed in FP versus FN |
| AMMECR1      | -1.143           | 4.053        | 0.000            | Underexpressed in FP versus FN |
| SAMD5        | -2.707           | 2.180        | 0.001            | Underexpressed in FP versus FN |
| NYNRIN       | -1.617           | 5.682        | 0.000            | Underexpressed in FP versus FN |
| ADAMTS6      | -2.039           | 2.997        | 0.001            | Underexpressed in FP versus FN |
| IGSF9        | -3.303           | 2.190        | 0.001            | Underexpressed in FP versus FN |
| TAC1         | -4.859           | -2.495       | 0.001            | Underexpressed in FP versus FN |
| SAMD9        | -1.559           | 3.340        | 0.001            | Underexpressed in FP versus FN |
| PRSS56       | -2.218           | 1.103        | 0.001            | Underexpressed in FP versus FN |

## Supplementary Table 10 (continued)

| Symbol      | Log2.Fold.Change | Log2.AveExpr | Adjusted.P.value | Category                       |
|-------------|------------------|--------------|------------------|--------------------------------|
| RBM43       | -1.033           | 2.895        | 0.001            | Underexpressed in FP versus FN |
| MTMR11      | -1.330           | 3.271        | 0.001            | Underexpressed in FP versus FN |
| LINC00624   | -3.687           | -1.919       | 0.001            | Underexpressed in FP versus FN |
| WNK4        | -1.933           | 0.182        | 0.001            | Underexpressed in FP versus FN |
| RGAG4       | -1.385           | 3.848        | 0.001            | Underexpressed in FP versus FN |
| RP1-177G6.2 | -4.787           | -2.246       | 0.001            | Underexpressed in FP versus FN |
| MB21D1      | -1.082           | 2.223        | 0.001            | Underexpressed in FP versus FN |
| EMR2        | -1.543           | 2.853        | 0.001            | Underexpressed in FP versus FN |
| TMEM35      | -2.665           | 0.359        | 0.001            | Underexpressed in FP versus FN |
| SAMD10      | -1.384           | 1.678        | 0.001            | Underexpressed in FP versus FN |
| C11orf75    | -1.120           | 2.770        | 0.001            | Underexpressed in FP versus FN |
| NRGN        | -1.486           | 2.160        | 0.001            | Underexpressed in FP versus FN |
| IL17D       | -1.295           | 2.948        | 0.001            | Underexpressed in FP versus FN |
| NCR3LG1     | -2.069           | 1.078        | 0.001            | Underexpressed in FP versus FN |
| SIPA1       | -1.033           | 5.368        | 0.000            | Underexpressed in FP versus FN |
| SMAD6       | -1.249           | 3.075        | 0.001            | Underexpressed in FP versus FN |
| STAMBPL1    | -1.628           | 1.989        | 0.001            | Underexpressed in FP versus FN |
| SNHG4       | -1.552           | 2.119        | 0.001            | Underexpressed in FP versus FN |
| NAV3        | -2.817           | 3.325        | 0.001            | Underexpressed in FP versus FN |
| LIX1        | -3.422           | -0.949       | 0.001            | Underexpressed in FP versus FN |
| ANGPT1      | -2.221           | 1.714        | 0.001            | Underexpressed in FP versus FN |
| AMOT        | -1.521           | 4.602        | 0.001            | Underexpressed in FP versus FN |
| SLFN12      | -1.989           | 1.757        | 0.001            | Underexpressed in FP versus FN |
| PARP8       | -2.050           | 3.908        | 0.001            | Underexpressed in FP versus FN |
| ANGPTL1     | -2.393           | 3.269        | 0.001            | Underexpressed in FP versus FN |

## Supplementary Table 10 (continued)

| Symbol    | Log2.Fold.Change | Log2.AveExpr | Adjusted.P.value | Category                       |
|-----------|------------------|--------------|------------------|--------------------------------|
| FABP5     | -2.024           | 3.066        | 0.001            | Underexpressed in FP versus FN |
| DDX60     | -1.138           | 3.515        | 0.001            | Underexpressed in FP versus FN |
| PRKAA2    | -3.037           | 1.484        | 0.001            | Underexpressed in FP versus FN |
| EFHA2     | -2.102           | 2.687        | 0.001            | Underexpressed in FP versus FN |
| SULT1E1   | -4.271           | -3.405       | 0.001            | Underexpressed in FP versus FN |
| KCNJ15    | -2.392           | 0.259        | 0.001            | Underexpressed in FP versus FN |
| LIN7A     | -2.333           | 0.181        | 0.001            | Underexpressed in FP versus FN |
| CPM       | -2.908           | 4.124        | 0.001            | Underexpressed in FP versus FN |
| TAS1R1    | -2.826           | -0.345       | 0.001            | Underexpressed in FP versus FN |
| CCKAR     | -4.527           | -1.860       | 0.001            | Underexpressed in FP versus FN |
| CCDC144NL | -4.339           | -2.708       | 0.001            | Underexpressed in FP versus FN |
| PDPN      | -2.379           | 3.086        | 0.001            | Underexpressed in FP versus FN |
| HMG5      | -1.599           | 2.285        | 0.001            | Underexpressed in FP versus FN |
| ENDOU     | -2.027           | -1.319       | 0.001            | Underexpressed in FP versus FN |
| TRIP6     | -1.350           | 5.769        | 0.001            | Underexpressed in FP versus FN |
| SEMA4F    | -1.738           | 3.170        | 0.001            | Underexpressed in FP versus FN |
| PCDHA2    | -2.914           | -0.588       | 0.001            | Underexpressed in FP versus FN |
| STEAP2    | -3.193           | 2.793        | 0.001            | Underexpressed in FP versus FN |
| ADAM22    | -1.833           | 3.672        | 0.001            | Underexpressed in FP versus FN |
| DCHS2     | -3.927           | -0.859       | 0.001            | Underexpressed in FP versus FN |
| FAIM2     | -2.098           | 3.219        | 0.001            | Underexpressed in FP versus FN |
| LRFN3     | -1.248           | 3.239        | 0.001            | Underexpressed in FP versus FN |
| HOXA13    | -3.967           | -1.380       | 0.001            | Underexpressed in FP versus FN |
| THEM6     | -1.105           | 3.435        | 0.001            | Underexpressed in FP versus FN |
| SPAG1     | -1.671           | 0.641        | 0.001            | Underexpressed in FP versus FN |

## Supplementary Table 10 (continued)

| Symbol  | Log2.Fold.Change | Log2.AveExpr | Adjusted.P.value | Category                       |
|---------|------------------|--------------|------------------|--------------------------------|
| LRRC38  | -3.951           | -3.351       | 0.001            | Underexpressed in FP versus FN |
| PRRT2   | -1.374           | 2.885        | 0.001            | Underexpressed in FP versus FN |
| GAS2    | -4.946           | 1.988        | 0.001            | Underexpressed in FP versus FN |
| REEP6   | -1.861           | 0.398        | 0.001            | Underexpressed in FP versus FN |
| MRGPRF  | -1.864           | 2.854        | 0.001            | Underexpressed in FP versus FN |
| CYP26B1 | -1.970           | 3.216        | 0.001            | Underexpressed in FP versus FN |
| HOTAIR  | -4.622           | 2.609        | 0.001            | Underexpressed in FP versus FN |
| DIRAS3  | -1.882           | 0.401        | 0.001            | Underexpressed in FP versus FN |
| NTNG1   | -4.197           | -2.158       | 0.001            | Underexpressed in FP versus FN |
| HAND2   | -2.907           | 1.951        | 0.001            | Underexpressed in FP versus FN |
| PPAP2B  | -1.503           | 5.295        | 0.001            | Underexpressed in FP versus FN |
| DAAM2   | -1.374           | 4.784        | 0.001            | Underexpressed in FP versus FN |
| HOXC10  | -3.872           | 3.416        | 0.001            | Underexpressed in FP versus FN |
| STEAP1B | -2.104           | 0.248        | 0.001            | Underexpressed in FP versus FN |
| NAT1    | -1.510           | 0.935        | 0.001            | Underexpressed in FP versus FN |
| SH2D4A  | -2.257           | 1.415        | 0.001            | Underexpressed in FP versus FN |
| SLC40A1 | -1.001           | 6.113        | 0.001            | Underexpressed in FP versus FN |
| TAGLN2  | -1.157           | 6.797        | 0.001            | Underexpressed in FP versus FN |
| ITM2C   | -1.490           | 6.696        | 0.001            | Underexpressed in FP versus FN |
| MAGEL2  | -2.039           | 3.877        | 0.001            | Underexpressed in FP versus FN |
| CD300E  | -2.485           | -0.327       | 0.001            | Underexpressed in FP versus FN |
| XIRP2   | -3.903           | 2.571        | 0.001            | Underexpressed in FP versus FN |
| CCDC89  | -1.228           | 1.498        | 0.001            | Underexpressed in FP versus FN |
| PDGFC   | -1.264           | 5.657        | 0.001            | Underexpressed in FP versus FN |
| IGSF1   | -2.445           | 2.134        | 0.001            | Underexpressed in FP versus FN |

## Supplementary Table 10 (continued)

| Symbol       | Log2.Fold.Change | Log2.AveExpr | Adjusted.P.value | Category                       |
|--------------|------------------|--------------|------------------|--------------------------------|
| HTR7P1       | -1.429           | 1.784        | 0.001            | Underexpressed in FP versus FN |
| PCNXL2       | -2.278           | 2.522        | 0.001            | Underexpressed in FP versus FN |
| LTBP1        | -1.688           | 6.175        | 0.001            | Underexpressed in FP versus FN |
| ADCYAP1R1    | -2.117           | 4.357        | 0.001            | Underexpressed in FP versus FN |
| LY6E         | -1.393           | 5.889        | 0.001            | Underexpressed in FP versus FN |
| PNMAL2       | -1.252           | 2.167        | 0.001            | Underexpressed in FP versus FN |
| MAGEC3       | -2.929           | -2.646       | 0.002            | Underexpressed in FP versus FN |
| MMP16        | -3.153           | 1.821        | 0.001            | Underexpressed in FP versus FN |
| SLC17A5      | -1.001           | 3.806        | 0.001            | Underexpressed in FP versus FN |
| OSBPL10      | -1.449           | 3.455        | 0.001            | Underexpressed in FP versus FN |
| XKR5         | -1.811           | 2.634        | 0.001            | Underexpressed in FP versus FN |
| 6-Sep        | -1.141           | 6.187        | 0.001            | Underexpressed in FP versus FN |
| CNTN3        | -3.304           | 1.612        | 0.002            | Underexpressed in FP versus FN |
| EYA4         | -1.635           | 4.705        | 0.001            | Underexpressed in FP versus FN |
| OLFML1       | -1.431           | 4.023        | 0.001            | Underexpressed in FP versus FN |
| DUSP6        | -1.750           | 6.747        | 0.001            | Underexpressed in FP versus FN |
| PRAC         | -4.938           | -3.528       | 0.002            | Underexpressed in FP versus FN |
| SIDT1        | -1.872           | 0.947        | 0.002            | Underexpressed in FP versus FN |
| CD101        | -1.495           | 3.750        | 0.001            | Underexpressed in FP versus FN |
| SLCO5A1      | -2.485           | -0.505       | 0.002            | Underexpressed in FP versus FN |
| DMC1         | -2.022           | -0.033       | 0.002            | Underexpressed in FP versus FN |
| CYP46A1      | -1.395           | 0.821        | 0.002            | Underexpressed in FP versus FN |
| LOC100506190 | -1.163           | 2.460        | 0.001            | Underexpressed in FP versus FN |
| DLX6         | -3.681           | -2.296       | 0.002            | Underexpressed in FP versus FN |
| SLC44A3      | -1.527           | 1.611        | 0.002            | Underexpressed in FP versus FN |



## Supplementary Table 10 (continued)

| Symbol     | Log2.Fold.Change | Log2.AveExpr | Adjusted.P.value | Category                       |
|------------|------------------|--------------|------------------|--------------------------------|
| SP110      | -1.256           | 3.258        | 0.001            | Underexpressed in FP versus FN |
| GRIK5      | -2.555           | 2.706        | 0.002            | Underexpressed in FP versus FN |
| KCNN1      | -2.374           | -1.025       | 0.002            | Underexpressed in FP versus FN |
| OCA2       | -2.670           | 1.168        | 0.002            | Underexpressed in FP versus FN |
| ZNF280B    | -1.847           | 2.246        | 0.002            | Underexpressed in FP versus FN |
| NCAM2      | -2.634           | 0.433        | 0.002            | Underexpressed in FP versus FN |
| SH3RF3     | -1.182           | 4.755        | 0.001            | Underexpressed in FP versus FN |
| GALNT3     | -1.841           | 1.063        | 0.002            | Underexpressed in FP versus FN |
| COL21A1    | -1.759           | 4.912        | 0.001            | Underexpressed in FP versus FN |
| HS6ST2     | -1.093           | 6.412        | 0.001            | Underexpressed in FP versus FN |
| INSC       | -2.505           | -1.633       | 0.002            | Underexpressed in FP versus FN |
| CITED1     | -1.363           | 3.363        | 0.001            | Underexpressed in FP versus FN |
| ITGA2B     | -2.023           | 0.593        | 0.002            | Underexpressed in FP versus FN |
| CDK6       | -1.275           | 7.833        | 0.001            | Underexpressed in FP versus FN |
| NPTX2      | -4.079           | 3.940        | 0.002            | Underexpressed in FP versus FN |
| LIPE       | -1.264           | 2.447        | 0.002            | Underexpressed in FP versus FN |
| LOC338817  | -2.003           | -0.002       | 0.002            | Underexpressed in FP versus FN |
| CNTN6      | -2.986           | 0.065        | 0.002            | Underexpressed in FP versus FN |
| CD97       | -1.269           | 5.025        | 0.001            | Underexpressed in FP versus FN |
| TPTEP1     | -2.469           | -0.344       | 0.002            | Underexpressed in FP versus FN |
| HSD3BP4    | -2.294           | 0.026        | 0.002            | Underexpressed in FP versus FN |
| IFIT2      | -1.371           | 3.400        | 0.002            | Underexpressed in FP versus FN |
| ANKRD20A5P | -2.677           | -1.661       | 0.002            | Underexpressed in FP versus FN |
| RGS19      | -1.100           | 3.255        | 0.002            | Underexpressed in FP versus FN |
| PCDH10     | -3.020           | 0.016        | 0.003            | Underexpressed in FP versus FN |

## Supplementary Table 10 (continued)

| Symbol    | Log2.Fold.Change | Log2.AveExpr | Adjusted.P.value | Category                       |
|-----------|------------------|--------------|------------------|--------------------------------|
| MATN2     | -1.818           | 5.992        | 0.001            | Underexpressed in FP versus FN |
| PLSCR1    | -1.031           | 4.247        | 0.001            | Underexpressed in FP versus FN |
| MGAT5     | -1.027           | 6.403        | 0.001            | Underexpressed in FP versus FN |
| TMEM108   | -1.914           | 3.301        | 0.002            | Underexpressed in FP versus FN |
| IQSEC2    | -1.328           | 3.054        | 0.002            | Underexpressed in FP versus FN |
| COL9A3    | -4.069           | 3.234        | 0.002            | Underexpressed in FP versus FN |
| LTB4R2    | -1.130           | 0.848        | 0.003            | Underexpressed in FP versus FN |
| CACNA1C   | -1.547           | 3.570        | 0.002            | Underexpressed in FP versus FN |
| FOXA1     | -3.076           | -3.045       | 0.003            | Underexpressed in FP versus FN |
| KCNJ3     | -3.820           | -0.977       | 0.003            | Underexpressed in FP versus FN |
| TBC1D8B   | -1.554           | 2.438        | 0.002            | Underexpressed in FP versus FN |
| LOC440910 | -4.635           | -3.226       | 0.003            | Underexpressed in FP versus FN |
| PDE5A     | -1.161           | 4.549        | 0.002            | Underexpressed in FP versus FN |
| IL1RAPL2  | -2.499           | -0.146       | 0.003            | Underexpressed in FP versus FN |
| GYLTL1B   | -2.691           | -1.137       | 0.003            | Underexpressed in FP versus FN |
| SH2D2A    | -1.695           | 0.652        | 0.003            | Underexpressed in FP versus FN |
| TM4SF1    | -1.044           | 4.170        | 0.002            | Underexpressed in FP versus FN |
| PABPC4L   | -1.444           | 2.810        | 0.002            | Underexpressed in FP versus FN |
| PI15      | -3.300           | 2.322        | 0.003            | Underexpressed in FP versus FN |
| TRIM46    | -1.606           | 1.878        | 0.003            | Underexpressed in FP versus FN |
| SBSPON    | -1.309           | 2.384        | 0.002            | Underexpressed in FP versus FN |
| C2orf81   | -1.093           | 1.775        | 0.003            | Underexpressed in FP versus FN |
| MIPOL1    | -2.178           | 2.426        | 0.003            | Underexpressed in FP versus FN |
| COL15A1   | -1.324           | 7.395        | 0.002            | Underexpressed in FP versus FN |
| STK32A    | -2.600           | -2.169       | 0.003            | Underexpressed in FP versus FN |

## Supplementary Table 10 (continued)

| Symbol     | Log2.Fold.Change | Log2.AveExpr | Adjusted.P.value | Category                       |
|------------|------------------|--------------|------------------|--------------------------------|
| SLC5A1     | -3.140           | -3.135       | 0.003            | Underexpressed in FP versus FN |
| TGFBR2     | -1.062           | 5.865        | 0.002            | Underexpressed in FP versus FN |
| SOWAHA     | -2.617           | -2.388       | 0.003            | Underexpressed in FP versus FN |
| GNB3       | -1.209           | 4.781        | 0.002            | Underexpressed in FP versus FN |
| GJA5       | -1.659           | 2.604        | 0.003            | Underexpressed in FP versus FN |
| FAM13C     | -1.325           | 1.832        | 0.003            | Underexpressed in FP versus FN |
| SCN9A      | -2.894           | 1.987        | 0.003            | Underexpressed in FP versus FN |
| C1orf114   | -1.422           | 1.411        | 0.003            | Underexpressed in FP versus FN |
| MAMDC2     | -1.915           | 2.087        | 0.003            | Underexpressed in FP versus FN |
| OSR1       | -2.410           | 1.444        | 0.003            | Underexpressed in FP versus FN |
| NOS2       | -1.640           | 0.020        | 0.003            | Underexpressed in FP versus FN |
| FCN1       | -2.607           | -0.429       | 0.004            | Underexpressed in FP versus FN |
| CSGALNACT1 | -1.235           | 3.269        | 0.002            | Underexpressed in FP versus FN |
| DUOX2      | -2.373           | -1.593       | 0.004            | Underexpressed in FP versus FN |
| SPATA9     | -1.181           | 1.028        | 0.003            | Underexpressed in FP versus FN |
| LINC00478  | -1.748           | 3.731        | 0.002            | Underexpressed in FP versus FN |
| TG         | -1.867           | 0.959        | 0.003            | Underexpressed in FP versus FN |
| MOXD1      | -3.325           | 2.927        | 0.003            | Underexpressed in FP versus FN |
| AKR1C1     | -1.768           | 1.434        | 0.003            | Underexpressed in FP versus FN |
| IKBKE      | -1.340           | 2.488        | 0.003            | Underexpressed in FP versus FN |
| SLC16A14   | -1.337           | 1.688        | 0.003            | Underexpressed in FP versus FN |
| SAMD12     | -2.718           | -0.562       | 0.004            | Underexpressed in FP versus FN |
| XKR9       | -2.428           | -0.515       | 0.004            | Underexpressed in FP versus FN |
| CMTM8      | -1.130           | 1.106        | 0.003            | Underexpressed in FP versus FN |
| ATP10B     | -3.148           | -3.277       | 0.004            | Underexpressed in FP versus FN |

### Supplementary Table 10 (continued)

| Symbol      | Log2.Fold.Change | Log2.AveExpr | Adjusted.P.value | Category                       |
|-------------|------------------|--------------|------------------|--------------------------------|
| NOV         | -2.780           | 2.968        | 0.003            | Underexpressed in FP versus FN |
| CYP26A1     | -2.933           | -1.857       | 0.004            | Underexpressed in FP versus FN |
| CCL2        | -1.972           | 4.857        | 0.002            | Underexpressed in FP versus FN |
| METTTL7A    | -1.331           | 4.538        | 0.002            | Underexpressed in FP versus FN |
| ARHGAP20    | -1.804           | 1.410        | 0.004            | Underexpressed in FP versus FN |
| AXL         | -1.213           | 4.998        | 0.002            | Underexpressed in FP versus FN |
| SLC39A4     | -1.351           | 3.274        | 0.003            | Underexpressed in FP versus FN |
| SPTLC3      | -1.818           | 0.704        | 0.004            | Underexpressed in FP versus FN |
| NOG         | -1.710           | 2.376        | 0.003            | Underexpressed in FP versus FN |
| ALX4        | -2.494           | 3.605        | 0.003            | Underexpressed in FP versus FN |
| FLJ42875    | -2.813           | 0.629        | 0.004            | Underexpressed in FP versus FN |
| CHN2        | -1.562           | 2.556        | 0.003            | Underexpressed in FP versus FN |
| LAG3        | -1.202           | 2.170        | 0.003            | Underexpressed in FP versus FN |
| SLC7A11     | -1.895           | 0.892        | 0.004            | Underexpressed in FP versus FN |
| NUAK1       | -1.186           | 4.779        | 0.002            | Underexpressed in FP versus FN |
| CPT1A       | -1.141           | 4.932        | 0.002            | Underexpressed in FP versus FN |
| CCDC114     | -1.660           | -0.569       | 0.005            | Underexpressed in FP versus FN |
| C1orf115    | -1.807           | 2.522        | 0.003            | Underexpressed in FP versus FN |
| LOC284648   | -1.356           | 1.028        | 0.004            | Underexpressed in FP versus FN |
| CNN2        | -1.006           | 6.741        | 0.002            | Underexpressed in FP versus FN |
| SLFN13      | -2.549           | 2.353        | 0.004            | Underexpressed in FP versus FN |
| ZMYND12     | -1.523           | -0.910       | 0.005            | Underexpressed in FP versus FN |
| SH3BGRL     | -1.030           | 6.197        | 0.002            | Underexpressed in FP versus FN |
| RGS7        | -4.311           | 1.480        | 0.004            | Underexpressed in FP versus FN |
| RNF144A-AS1 | -2.538           | -0.429       | 0.005            | Underexpressed in FP versus FN |

## Supplementary Table 10 (continued)

| Symbol    | Log2.Fold.Change | Log2.AveExpr | Adjusted.P.value | Category                       |
|-----------|------------------|--------------|------------------|--------------------------------|
| IGF2      | -1.287           | 8.211        | 0.003            | Underexpressed in FP versus FN |
| FIGNL2    | -1.938           | 0.072        | 0.005            | Underexpressed in FP versus FN |
| ZBTB7C    | -2.374           | 1.500        | 0.004            | Underexpressed in FP versus FN |
| ANKRD44   | -1.303           | 4.098        | 0.003            | Underexpressed in FP versus FN |
| SPAG17    | -2.590           | 0.349        | 0.005            | Underexpressed in FP versus FN |
| SAMD14    | -1.089           | 2.293        | 0.004            | Underexpressed in FP versus FN |
| LPHN3     | -1.775           | 3.376        | 0.003            | Underexpressed in FP versus FN |
| ARSE      | -1.876           | 0.160        | 0.005            | Underexpressed in FP versus FN |
| NBLA00301 | -2.555           | -1.105       | 0.005            | Underexpressed in FP versus FN |
| SLC25A23  | -1.344           | 4.148        | 0.003            | Underexpressed in FP versus FN |
| PACSL1    | -2.587           | 1.768        | 0.005            | Underexpressed in FP versus FN |
| MST1R     | -1.423           | 0.637        | 0.005            | Underexpressed in FP versus FN |
| EFNA2     | -3.083           | 1.999        | 0.005            | Underexpressed in FP versus FN |
| RFTN2     | -1.455           | 2.599        | 0.004            | Underexpressed in FP versus FN |
| SCPEP1    | -1.063           | 4.670        | 0.003            | Underexpressed in FP versus FN |
| CCND1     | -1.505           | 6.743        | 0.003            | Underexpressed in FP versus FN |
| COL9A2    | -1.976           | 3.276        | 0.004            | Underexpressed in FP versus FN |
| ELF4      | -1.026           | 3.903        | 0.003            | Underexpressed in FP versus FN |
| EPN3      | -1.924           | -1.361       | 0.006            | Underexpressed in FP versus FN |
| C19orf38  | -1.581           | 0.315        | 0.005            | Underexpressed in FP versus FN |
| NPTXR     | -1.744           | 2.834        | 0.004            | Underexpressed in FP versus FN |
| FBP2      | -2.008           | 0.064        | 0.006            | Underexpressed in FP versus FN |
| AKR1C2    | -1.809           | 1.712        | 0.005            | Underexpressed in FP versus FN |
| PDGFRL    | -2.061           | 2.573        | 0.004            | Underexpressed in FP versus FN |
| SORCS3    | -3.767           | -3.010       | 0.006            | Underexpressed in FP versus FN |

## Supplementary Table 10 (continued)

| Symbol   | Log2.Fold.Change | Log2.AveExpr | Adjusted.P.value | Category                       |
|----------|------------------|--------------|------------------|--------------------------------|
| RELB     | -1.193           | 3.121        | 0.004            | Underexpressed in FP versus FN |
| POU2F3   | -2.243           | -1.557       | 0.006            | Underexpressed in FP versus FN |
| PEG10    | -1.241           | 8.887        | 0.003            | Underexpressed in FP versus FN |
| SRXN1    | -1.146           | 4.032        | 0.003            | Underexpressed in FP versus FN |
| IQGAP2   | -1.368           | 2.884        | 0.004            | Underexpressed in FP versus FN |
| RSPO4    | -2.615           | -2.269       | 0.006            | Underexpressed in FP versus FN |
| GLI1     | -2.653           | 3.476        | 0.004            | Underexpressed in FP versus FN |
| GJB5     | -2.121           | -2.502       | 0.006            | Underexpressed in FP versus FN |
| RTN4RL2  | -1.967           | 1.651        | 0.005            | Underexpressed in FP versus FN |
| ISM1     | -1.606           | 0.766        | 0.005            | Underexpressed in FP versus FN |
| DSCR8    | -3.666           | 1.229        | 0.005            | Underexpressed in FP versus FN |
| KCNH1    | -2.107           | 1.651        | 0.005            | Underexpressed in FP versus FN |
| PHACTR3  | -2.344           | 2.132        | 0.005            | Underexpressed in FP versus FN |
| HIC1     | -1.321           | 4.619        | 0.003            | Underexpressed in FP versus FN |
| EPHX2    | -1.609           | 2.940        | 0.004            | Underexpressed in FP versus FN |
| LYNX1    | -2.100           | 2.559        | 0.005            | Underexpressed in FP versus FN |
| B3GALT2  | -1.159           | 3.571        | 0.004            | Underexpressed in FP versus FN |
| TMEFF2   | -3.125           | 0.708        | 0.006            | Underexpressed in FP versus FN |
| WFIKKN2  | -2.054           | -0.163       | 0.006            | Underexpressed in FP versus FN |
| DAB2     | -1.181           | 5.641        | 0.003            | Underexpressed in FP versus FN |
| HPCAL4   | -2.510           | -1.158       | 0.006            | Underexpressed in FP versus FN |
| KIRREL   | -1.336           | 3.761        | 0.004            | Underexpressed in FP versus FN |
| CGREF1   | -1.853           | 1.316        | 0.006            | Underexpressed in FP versus FN |
| FADS2    | -1.178           | 5.815        | 0.003            | Underexpressed in FP versus FN |
| C11orf35 | -1.302           | 1.375        | 0.006            | Underexpressed in FP versus FN |

## Supplementary Table 10 (continued)

| Symbol  | Log2.Fold.Change | Log2.AveExpr | Adjusted.P.value | Category                       |
|---------|------------------|--------------|------------------|--------------------------------|
| CLSTN3  | -1.374           | 4.501        | 0.003            | Underexpressed in FP versus FN |
| RARB    | -1.246           | 2.705        | 0.005            | Underexpressed in FP versus FN |
| GABRA5  | -3.057           | 1.765        | 0.006            | Underexpressed in FP versus FN |
| EPHB6   | -1.640           | 2.290        | 0.005            | Underexpressed in FP versus FN |
| F2RL2   | -2.385           | 1.601        | 0.006            | Underexpressed in FP versus FN |
| ZNF532  | -1.031           | 6.572        | 0.003            | Underexpressed in FP versus FN |
| RTN4R   | -1.700           | 3.096        | 0.004            | Underexpressed in FP versus FN |
| DUOXA1  | -2.349           | -1.952       | 0.007            | Underexpressed in FP versus FN |
| PHYHIP  | -1.693           | 0.886        | 0.006            | Underexpressed in FP versus FN |
| ZNF385C | -1.551           | 2.936        | 0.005            | Underexpressed in FP versus FN |
| EMB     | -2.102           | 3.627        | 0.004            | Underexpressed in FP versus FN |
| COL8A2  | -2.060           | 4.167        | 0.004            | Underexpressed in FP versus FN |
| NELL2   | -3.186           | 1.215        | 0.006            | Underexpressed in FP versus FN |
| FOXD2   | -2.052           | 0.476        | 0.006            | Underexpressed in FP versus FN |
| YPEL4   | -1.374           | 1.815        | 0.006            | Underexpressed in FP versus FN |
| HOXB4   | -2.397           | 1.334        | 0.006            | Underexpressed in FP versus FN |
| MAGI3   | -1.018           | 3.605        | 0.004            | Underexpressed in FP versus FN |
| ZNF618  | -1.151           | 5.672        | 0.003            | Underexpressed in FP versus FN |
| AGAP2   | -1.439           | 4.812        | 0.003            | Underexpressed in FP versus FN |
| JPH4    | -2.993           | 0.523        | 0.007            | Underexpressed in FP versus FN |
| KHDRBS2 | -2.466           | -1.992       | 0.008            | Underexpressed in FP versus FN |
| IGFBP3  | -1.396           | 6.941        | 0.003            | Underexpressed in FP versus FN |
| WIF1    | -4.053           | -2.375       | 0.008            | Underexpressed in FP versus FN |
| SHROOM1 | -1.099           | 1.893        | 0.006            | Underexpressed in FP versus FN |
| FZD9    | -2.255           | 1.278        | 0.007            | Underexpressed in FP versus FN |

## Supplementary Table 10 (continued)

| Symbol    | Log2.Fold.Change | Log2.AveExpr | Adjusted.P.value | Category                       |
|-----------|------------------|--------------|------------------|--------------------------------|
| TMEM173   | -1.003           | 5.393        | 0.003            | Underexpressed in FP versus FN |
| FOXC1     | -1.345           | 2.962        | 0.005            | Underexpressed in FP versus FN |
| NKX2-3    | -3.858           | -2.553       | 0.008            | Underexpressed in FP versus FN |
| BNC2      | -1.172           | 5.326        | 0.003            | Underexpressed in FP versus FN |
| ESRP1     | -3.526           | -3.251       | 0.008            | Underexpressed in FP versus FN |
| LOC400043 | -1.398           | 2.994        | 0.005            | Underexpressed in FP versus FN |
| SLIT2     | -1.635           | 3.019        | 0.005            | Underexpressed in FP versus FN |
| CTHRC1    | -1.621           | 5.200        | 0.004            | Underexpressed in FP versus FN |
| LPIN3     | -1.258           | 2.952        | 0.005            | Underexpressed in FP versus FN |
| CACNB4    | -1.457           | 1.470        | 0.007            | Underexpressed in FP versus FN |
| KCNA6     | -2.040           | 0.386        | 0.008            | Underexpressed in FP versus FN |
| NOTUM     | -2.129           | 1.938        | 0.007            | Underexpressed in FP versus FN |
| M1        | -1.677           | 2.795        | 0.006            | Underexpressed in FP versus FN |
| RET       | -1.976           | 1.255        | 0.007            | Underexpressed in FP versus FN |
| TLX1      | -3.386           | -0.642       | 0.008            | Underexpressed in FP versus FN |
| NBPF3     | -1.233           | 2.470        | 0.006            | Underexpressed in FP versus FN |
| HSD17B2   | -3.526           | -3.764       | 0.009            | Underexpressed in FP versus FN |
| SLITRK5   | -2.126           | 3.339        | 0.006            | Underexpressed in FP versus FN |
| OPRK1     | -3.883           | -3.695       | 0.009            | Underexpressed in FP versus FN |
| C1orf54   | -1.055           | 3.411        | 0.005            | Underexpressed in FP versus FN |
| LRRN4CL   | -2.389           | 1.539        | 0.007            | Underexpressed in FP versus FN |
| GNG11     | -1.003           | 4.963        | 0.004            | Underexpressed in FP versus FN |
| IGSF9B    | -1.871           | 0.096        | 0.008            | Underexpressed in FP versus FN |
| EMILIN3   | -1.429           | 4.867        | 0.004            | Underexpressed in FP versus FN |
| C1orf116  | -2.908           | -3.852       | 0.009            | Underexpressed in FP versus FN |



## Supplementary Table 10 (continued)

| Symbol      | Log2.Fold.Change | Log2.AveExpr | Adjusted.P.value | Category                       |
|-------------|------------------|--------------|------------------|--------------------------------|
| SIGIRR      | -1.327           | 3.722        | 0.005            | Underexpressed in FP versus FN |
| HOXA10      | -2.398           | 1.993        | 0.007            | Underexpressed in FP versus FN |
| DACT3       | -1.398           | 3.991        | 0.005            | Underexpressed in FP versus FN |
| IGFBP1      | -2.574           | -4.540       | 0.009            | Underexpressed in FP versus FN |
| SHROOM2     | -1.347           | 3.231        | 0.006            | Underexpressed in FP versus FN |
| ARX         | -2.298           | -1.456       | 0.010            | Underexpressed in FP versus FN |
| DSC3        | -3.556           | -3.466       | 0.010            | Underexpressed in FP versus FN |
| STEAP1      | -2.282           | 1.674        | 0.008            | Underexpressed in FP versus FN |
| PTPRQ       | -2.551           | -0.233       | 0.009            | Underexpressed in FP versus FN |
| SNPH        | -1.387           | 4.858        | 0.005            | Underexpressed in FP versus FN |
| CD109       | -1.157           | 4.024        | 0.005            | Underexpressed in FP versus FN |
| EBF2        | -1.687           | 3.350        | 0.006            | Underexpressed in FP versus FN |
| PDE4A       | -1.224           | 2.948        | 0.006            | Underexpressed in FP versus FN |
| AGTR2       | -3.771           | 1.087        | 0.009            | Underexpressed in FP versus FN |
| EMP3        | -1.095           | 5.430        | 0.004            | Underexpressed in FP versus FN |
| CTCF        | -3.967           | -1.983       | 0.011            | Underexpressed in FP versus FN |
| MYF6        | -4.692           | 1.643        | 0.009            | Underexpressed in FP versus FN |
| PTCH1       | -1.096           | 4.695        | 0.005            | Underexpressed in FP versus FN |
| NTN3        | -1.409           | 0.604        | 0.009            | Underexpressed in FP versus FN |
| SEMA3G      | -1.465           | 2.792        | 0.007            | Underexpressed in FP versus FN |
| CCDC74B-AS1 | -4.291           | -3.447       | 0.011            | Underexpressed in FP versus FN |
| CPED1       | -1.642           | 2.535        | 0.007            | Underexpressed in FP versus FN |
| RHOJ        | -1.228           | 4.590        | 0.005            | Underexpressed in FP versus FN |
| MKX         | -2.985           | 0.737        | 0.010            | Underexpressed in FP versus FN |
| ELK3        | -1.166           | 3.739        | 0.006            | Underexpressed in FP versus FN |

## Supplementary Table 10 (continued)

| Symbol    | Log2.Fold.Change | Log2.AveExpr | Adjusted.P.value | Category                       |
|-----------|------------------|--------------|------------------|--------------------------------|
| SYT13     | -3.641           | -1.926       | 0.011            | Underexpressed in FP versus FN |
| CFI       | -1.837           | 3.172        | 0.007            | Underexpressed in FP versus FN |
| HOXB-AS5  | -4.487           | -2.131       | 0.011            | Underexpressed in FP versus FN |
| NEFH      | -1.866           | 2.859        | 0.007            | Underexpressed in FP versus FN |
| HOXC9     | -1.698           | 3.062        | 0.007            | Underexpressed in FP versus FN |
| C1orf233  | -1.351           | 1.892        | 0.008            | Underexpressed in FP versus FN |
| EREG      | -2.608           | -4.016       | 0.012            | Underexpressed in FP versus FN |
| COL3A1    | -1.538           | 11.788       | 0.008            | Underexpressed in FP versus FN |
| GRIN3A    | -2.000           | 0.761        | 0.010            | Underexpressed in FP versus FN |
| TCN2      | -1.026           | 3.244        | 0.007            | Underexpressed in FP versus FN |
| POU5F1P3  | -1.338           | -0.331       | 0.011            | Underexpressed in FP versus FN |
| RGS16     | -1.151           | 6.366        | 0.005            | Underexpressed in FP versus FN |
| RAB25     | -1.649           | -1.324       | 0.011            | Underexpressed in FP versus FN |
| ATP8A2    | -1.681           | -0.024       | 0.011            | Underexpressed in FP versus FN |
| IFIT1     | -1.090           | 4.274        | 0.006            | Underexpressed in FP versus FN |
| LYPD5     | -1.516           | 0.073        | 0.011            | Underexpressed in FP versus FN |
| SBK1      | -1.950           | 3.691        | 0.007            | Underexpressed in FP versus FN |
| TDO2      | -1.661           | 1.646        | 0.009            | Underexpressed in FP versus FN |
| SLITRK6   | -3.090           | -2.712       | 0.012            | Underexpressed in FP versus FN |
| SLC25A43  | -1.032           | 2.970        | 0.007            | Underexpressed in FP versus FN |
| SLC17A7   | -1.805           | 0.677        | 0.011            | Underexpressed in FP versus FN |
| ADORA1    | -1.367           | 4.012        | 0.006            | Underexpressed in FP versus FN |
| ADAP1     | -1.203           | 1.611        | 0.010            | Underexpressed in FP versus FN |
| BCAT1     | -1.303           | 7.794        | 0.006            | Underexpressed in FP versus FN |
| SERPINB13 | -3.129           | -5.316       | 0.013            | Underexpressed in FP versus FN |

## Supplementary Table 10 (continued)

| Symbol   | Log2.Fold.Change | Log2.AveExpr | Adjusted.P.value | Category                       |
|----------|------------------|--------------|------------------|--------------------------------|
| GREM2    | -2.635           | -0.899       | 0.012            | Underexpressed in FP versus FN |
| SYCP2L   | -1.707           | 0.885        | 0.011            | Underexpressed in FP versus FN |
| KIAA1324 | -1.478           | 0.073        | 0.012            | Underexpressed in FP versus FN |
| SERPINI1 | -1.747           | 3.201        | 0.008            | Underexpressed in FP versus FN |
| CASP8    | -1.090           | 2.841        | 0.008            | Underexpressed in FP versus FN |
| ADM2     | -1.707           | 1.378        | 0.010            | Underexpressed in FP versus FN |
| ZIC4     | -1.314           | 2.587        | 0.009            | Underexpressed in FP versus FN |
| ANXA2R   | -1.240           | 1.463        | 0.010            | Underexpressed in FP versus FN |
| PCDHA6   | -2.307           | -1.209       | 0.013            | Underexpressed in FP versus FN |
| TMEM163  | -1.843           | 1.544        | 0.010            | Underexpressed in FP versus FN |
| ZC3H12B  | -1.213           | 1.845        | 0.010            | Underexpressed in FP versus FN |
| SPRY2    | -1.182           | 7.230        | 0.006            | Underexpressed in FP versus FN |
| TCEAL7   | -1.179           | 4.092        | 0.007            | Underexpressed in FP versus FN |
| CYR61    | -1.269           | 6.855        | 0.006            | Underexpressed in FP versus FN |
| KRT5     | -3.775           | -1.694       | 0.014            | Underexpressed in FP versus FN |
| FBLN5    | -1.737           | 5.006        | 0.006            | Underexpressed in FP versus FN |
| LRP4     | -1.150           | 4.627        | 0.006            | Underexpressed in FP versus FN |
| MYF5     | -6.634           | 2.198        | 0.012            | Underexpressed in FP versus FN |
| KIAA1683 | -1.669           | 2.318        | 0.010            | Underexpressed in FP versus FN |
| C3orf67  | -1.410           | 0.984        | 0.011            | Underexpressed in FP versus FN |
| IGSF10   | -1.937           | 0.823        | 0.012            | Underexpressed in FP versus FN |
| MPZL2    | -1.300           | 1.993        | 0.010            | Underexpressed in FP versus FN |
| DCLK2    | -1.066           | 3.927        | 0.007            | Underexpressed in FP versus FN |
| GNG7     | -1.458           | 2.187        | 0.010            | Underexpressed in FP versus FN |
| LRRC16A  | -1.585           | 1.802        | 0.011            | Underexpressed in FP versus FN |

## Supplementary Table 10 (continued)

| Symbol      | Log2.Fold.Change | Log2.AveExpr | Adjusted.P.value | Category                       |
|-------------|------------------|--------------|------------------|--------------------------------|
| RAB11FIP5   | -1.003           | 3.895        | 0.007            | Underexpressed in FP versus FN |
| TMEM119     | -1.513           | 5.439        | 0.006            | Underexpressed in FP versus FN |
| CYP4V2      | -1.142           | 3.959        | 0.007            | Underexpressed in FP versus FN |
| TNMD        | -3.600           | -0.656       | 0.014            | Underexpressed in FP versus FN |
| CLDN4       | -1.804           | -0.401       | 0.013            | Underexpressed in FP versus FN |
| LDLRAD4     | -1.143           | 4.604        | 0.006            | Underexpressed in FP versus FN |
| PRPH        | -2.738           | 2.199        | 0.011            | Underexpressed in FP versus FN |
| RDH12       | -1.464           | -1.240       | 0.014            | Underexpressed in FP versus FN |
| CYTL1       | -3.648           | 2.235        | 0.011            | Underexpressed in FP versus FN |
| HOXB3       | -2.209           | 3.786        | 0.008            | Underexpressed in FP versus FN |
| TRABD2B     | -1.535           | 2.803        | 0.010            | Underexpressed in FP versus FN |
| DTX4        | -1.181           | 5.144        | 0.006            | Underexpressed in FP versus FN |
| GRIK4       | -2.079           | -0.747       | 0.015            | Underexpressed in FP versus FN |
| LPPR3       | -2.473           | -0.984       | 0.015            | Underexpressed in FP versus FN |
| ELL2        | -1.121           | 3.323        | 0.009            | Underexpressed in FP versus FN |
| GAB3        | -1.277           | 2.518        | 0.011            | Underexpressed in FP versus FN |
| BPIFB4      | -2.489           | -2.243       | 0.016            | Underexpressed in FP versus FN |
| CAPNS2      | -2.097           | -4.678       | 0.016            | Underexpressed in FP versus FN |
| AP1M2       | -1.224           | -0.893       | 0.015            | Underexpressed in FP versus FN |
| LOC153684   | -1.190           | 0.821        | 0.013            | Underexpressed in FP versus FN |
| ANKRD20A19P | -4.787           | 0.368        | 0.015            | Underexpressed in FP versus FN |
| GSDMA       | -2.162           | -1.885       | 0.016            | Underexpressed in FP versus FN |
| NPHS1       | -3.239           | -2.372       | 0.016            | Underexpressed in FP versus FN |
| TBX18       | -2.340           | 3.984        | 0.009            | Underexpressed in FP versus FN |
| C1QTNF9     | -1.923           | -1.554       | 0.016            | Underexpressed in FP versus FN |

### Supplementary Table 10 (continued)

| Symbol    | Log2.Fold.Change | Log2.AveExpr | Adjusted.P.value | Category                       |
|-----------|------------------|--------------|------------------|--------------------------------|
| FOXD2-AS1 | -1.423           | 1.408        | 0.013            | Underexpressed in FP versus FN |
| FAM5C     | -3.700           | -2.118       | 0.017            | Underexpressed in FP versus FN |
| SNAP25    | -1.961           | 1.637        | 0.013            | Underexpressed in FP versus FN |
| ABCA8     | -2.038           | 2.561        | 0.011            | Underexpressed in FP versus FN |
| C1QTNF9B  | -2.618           | -2.275       | 0.017            | Underexpressed in FP versus FN |
| C1RL      | -1.499           | 2.967        | 0.010            | Underexpressed in FP versus FN |
| SYNPO2    | -1.127           | 5.928        | 0.007            | Underexpressed in FP versus FN |
| NPTX1     | -2.362           | 0.671        | 0.015            | Underexpressed in FP versus FN |
| PPAP2C    | -1.625           | -1.071       | 0.016            | Underexpressed in FP versus FN |
| ACHE      | -1.713           | 2.826        | 0.011            | Underexpressed in FP versus FN |
| COL4A6    | -1.961           | 0.290        | 0.015            | Underexpressed in FP versus FN |
| GFRA2     | -2.407           | 1.767        | 0.013            | Underexpressed in FP versus FN |
| LHX8      | -4.088           | -3.425       | 0.018            | Underexpressed in FP versus FN |
| LOC442028 | -1.956           | -2.075       | 0.017            | Underexpressed in FP versus FN |
| CXCL6     | -3.072           | -3.883       | 0.018            | Underexpressed in FP versus FN |
| RGS2      | -1.111           | 5.199        | 0.007            | Underexpressed in FP versus FN |
| ADAMTS20  | -2.522           | -1.327       | 0.017            | Underexpressed in FP versus FN |
| PIANP     | -1.816           | 2.234        | 0.013            | Underexpressed in FP versus FN |
| TLR2      | -1.052           | 2.562        | 0.012            | Underexpressed in FP versus FN |
| HAPLN4    | -1.315           | 2.766        | 0.012            | Underexpressed in FP versus FN |
| PRAME     | -5.405           | 4.138        | 0.013            | Underexpressed in FP versus FN |
| FLRT2     | -1.107           | 5.277        | 0.007            | Underexpressed in FP versus FN |
| CLIC6     | -2.063           | -0.243       | 0.017            | Underexpressed in FP versus FN |
| CNGA3     | -2.729           | 0.566        | 0.016            | Underexpressed in FP versus FN |
| ADAMTSL3  | -1.550           | 2.809        | 0.012            | Underexpressed in FP versus FN |

## Supplementary Table 10 (continued)

| Symbol    | Log2.Fold.Change | Log2.AveExpr | Adjusted.P.value | Category                       |
|-----------|------------------|--------------|------------------|--------------------------------|
| SYT6      | -1.915           | 0.712        | 0.016            | Underexpressed in FP versus FN |
| LRRC7     | -2.473           | -1.067       | 0.018            | Underexpressed in FP versus FN |
| ARNTL2    | -1.453           | 1.953        | 0.014            | Underexpressed in FP versus FN |
| FAM110C   | -2.085           | -1.594       | 0.019            | Underexpressed in FP versus FN |
| TMEM52    | -1.738           | 0.750        | 0.016            | Underexpressed in FP versus FN |
| LOX       | -1.138           | 5.297        | 0.008            | Underexpressed in FP versus FN |
| LONRF2    | -2.121           | 0.536        | 0.017            | Underexpressed in FP versus FN |
| CH25H     | -1.965           | 0.522        | 0.017            | Underexpressed in FP versus FN |
| KIAA1161  | -1.318           | 1.781        | 0.014            | Underexpressed in FP versus FN |
| GPR174    | -2.090           | -2.541       | 0.020            | Underexpressed in FP versus FN |
| LINC00626 | -2.834           | -0.349       | 0.018            | Underexpressed in FP versus FN |
| OAS3      | -1.388           | 4.245        | 0.009            | Underexpressed in FP versus FN |
| PRSS3     | -1.518           | -2.110       | 0.020            | Underexpressed in FP versus FN |
| CRABP2    | -1.777           | 4.203        | 0.010            | Underexpressed in FP versus FN |
| BTBD19    | -1.033           | 1.703        | 0.015            | Underexpressed in FP versus FN |
| PTX3      | -2.184           | 0.589        | 0.017            | Underexpressed in FP versus FN |
| LOXL4     | -1.699           | 3.996        | 0.010            | Underexpressed in FP versus FN |
| ABCG2     | -1.147           | 1.949        | 0.014            | Underexpressed in FP versus FN |
| SCUBE2    | -1.420           | 2.738        | 0.013            | Underexpressed in FP versus FN |
| PRSS8     | -1.734           | -2.231       | 0.020            | Underexpressed in FP versus FN |
| MYOZ3     | -1.092           | 1.720        | 0.015            | Underexpressed in FP versus FN |
| LY6H      | -2.756           | -0.128       | 0.019            | Underexpressed in FP versus FN |
| ASTL      | -1.640           | -2.189       | 0.021            | Underexpressed in FP versus FN |
| CECR7     | -2.800           | -0.108       | 0.019            | Underexpressed in FP versus FN |
| CSF3R     | -1.238           | 2.569        | 0.013            | Underexpressed in FP versus FN |

## Supplementary Table 10 (continued)

| Symbol       | Log2.Fold.Change | Log2.AveExpr | Adjusted.P.value | Category                       |
|--------------|------------------|--------------|------------------|--------------------------------|
| C1RL-AS1     | -1.798           | 0.859        | 0.017            | Underexpressed in FP versus FN |
| NFKBID       | -1.104           | 1.692        | 0.016            | Underexpressed in FP versus FN |
| CCDC164      | -1.841           | -3.166       | 0.022            | Underexpressed in FP versus FN |
| IGFBP2       | -1.178           | 8.274        | 0.010            | Underexpressed in FP versus FN |
| LRRIQ1       | -2.392           | -1.665       | 0.021            | Underexpressed in FP versus FN |
| SLC7A10      | -2.150           | -1.986       | 0.022            | Underexpressed in FP versus FN |
| CXCL2        | -1.654           | 0.015        | 0.019            | Underexpressed in FP versus FN |
| RASSF2       | -1.113           | 4.320        | 0.010            | Underexpressed in FP versus FN |
| BOC          | -1.056           | 5.787        | 0.008            | Underexpressed in FP versus FN |
| NFATC4       | -1.108           | 6.274        | 0.008            | Underexpressed in FP versus FN |
| KLRC4        | -2.138           | -3.518       | 0.023            | Underexpressed in FP versus FN |
| RERGL        | -2.325           | -2.235       | 0.022            | Underexpressed in FP versus FN |
| HPSE         | -1.324           | 1.254        | 0.018            | Underexpressed in FP versus FN |
| AGPAT9       | -1.405           | 1.204        | 0.018            | Underexpressed in FP versus FN |
| CADM1        | -1.215           | 5.497        | 0.009            | Underexpressed in FP versus FN |
| PCDH9        | -1.601           | 1.503        | 0.017            | Underexpressed in FP versus FN |
| LOC100652791 | -1.457           | 0.985        | 0.018            | Underexpressed in FP versus FN |
| POU2F2       | -1.460           | 3.619        | 0.012            | Underexpressed in FP versus FN |
| NFKBIZ       | -1.088           | 3.930        | 0.011            | Underexpressed in FP versus FN |
| TUB          | -1.182           | 5.110        | 0.009            | Underexpressed in FP versus FN |
| ACOX2        | -1.246           | 1.918        | 0.016            | Underexpressed in FP versus FN |
| LGI1         | -2.591           | -2.485       | 0.023            | Underexpressed in FP versus FN |
| SCNN1A       | -2.097           | -2.513       | 0.023            | Underexpressed in FP versus FN |
| C1QL1        | -1.695           | 1.259        | 0.018            | Underexpressed in FP versus FN |
| LRRC56       | -1.156           | 2.047        | 0.016            | Underexpressed in FP versus FN |

### Supplementary Table 10 (continued)

| Symbol       | Log2.Fold.Change | Log2.AveExpr | Adjusted.P.value | Category                       |
|--------------|------------------|--------------|------------------|--------------------------------|
| ABCA9        | -1.837           | 2.293        | 0.016            | Underexpressed in FP versus FN |
| WNT5A        | -1.327           | 4.826        | 0.010            | Underexpressed in FP versus FN |
| KCNK1        | -2.364           | 0.205        | 0.021            | Underexpressed in FP versus FN |
| PTER         | -1.022           | 2.108        | 0.016            | Underexpressed in FP versus FN |
| SVEP1        | -1.643           | 4.345        | 0.011            | Underexpressed in FP versus FN |
| ULBP1        | -1.333           | 0.165        | 0.022            | Underexpressed in FP versus FN |
| AGR2         | -2.382           | -5.459       | 0.026            | Underexpressed in FP versus FN |
| SLC30A8      | -2.509           | -4.348       | 0.026            | Underexpressed in FP versus FN |
| CLDN1        | -1.927           | 1.089        | 0.020            | Underexpressed in FP versus FN |
| PRRG4        | -1.929           | -1.001       | 0.024            | Underexpressed in FP versus FN |
| SPON1        | -1.169           | 5.845        | 0.010            | Underexpressed in FP versus FN |
| FLJ22184     | -2.104           | 1.915        | 0.018            | Underexpressed in FP versus FN |
| MEGF6        | -1.164           | 5.582        | 0.010            | Underexpressed in FP versus FN |
| ARAP2        | -1.597           | 1.035        | 0.021            | Underexpressed in FP versus FN |
| HAL          | -1.621           | -1.771       | 0.025            | Underexpressed in FP versus FN |
| ITGA10       | -1.472           | 2.978        | 0.015            | Underexpressed in FP versus FN |
| B4GALT6      | -1.766           | 1.748        | 0.019            | Underexpressed in FP versus FN |
| TMPRSS13     | -1.985           | -1.680       | 0.026            | Underexpressed in FP versus FN |
| TMEM200A     | -1.259           | 2.801        | 0.016            | Underexpressed in FP versus FN |
| WIPF3        | -1.767           | 2.621        | 0.017            | Underexpressed in FP versus FN |
| C17orf96     | -1.016           | 2.607        | 0.017            | Underexpressed in FP versus FN |
| TAF7L        | -1.229           | -0.206       | 0.024            | Underexpressed in FP versus FN |
| CDH17        | -1.501           | -1.439       | 0.026            | Underexpressed in FP versus FN |
| PCDH15       | -2.820           | -0.139       | 0.025            | Underexpressed in FP versus FN |
| LOC100131320 | -2.129           | -3.209       | 0.028            | Underexpressed in FP versus FN |



## Supplementary Table 10 (continued)

| Symbol    | Log2.Fold.Change | Log2.AveExpr | Adjusted.P.value | Category                       |
|-----------|------------------|--------------|------------------|--------------------------------|
| PTGFR     | -2.618           | 2.093        | 0.020            | Underexpressed in FP versus FN |
| KRT40     | -3.432           | 0.171        | 0.025            | Underexpressed in FP versus FN |
| DDX43     | -1.647           | -0.404       | 0.025            | Underexpressed in FP versus FN |
| PTGDR2    | -1.446           | -0.023       | 0.024            | Underexpressed in FP versus FN |
| TP63      | -1.600           | 2.605        | 0.018            | Underexpressed in FP versus FN |
| TXLNB     | -1.748           | 2.780        | 0.017            | Underexpressed in FP versus FN |
| PCDHB4    | -1.100           | 2.939        | 0.016            | Underexpressed in FP versus FN |
| KERA      | -3.273           | -1.908       | 0.028            | Underexpressed in FP versus FN |
| STK31     | -1.492           | -1.562       | 0.027            | Underexpressed in FP versus FN |
| CSTA      | -1.605           | 0.436        | 0.024            | Underexpressed in FP versus FN |
| CXCL1     | -2.128           | -1.920       | 0.028            | Underexpressed in FP versus FN |
| FLJ35946  | -1.112           | 2.653        | 0.017            | Underexpressed in FP versus FN |
| GAS2L2    | -2.015           | -4.117       | 0.030            | Underexpressed in FP versus FN |
| SIAH3     | -1.803           | -2.140       | 0.028            | Underexpressed in FP versus FN |
| TINCR     | -1.176           | 0.073        | 0.025            | Underexpressed in FP versus FN |
| IL1RAP    | -1.728           | 2.565        | 0.018            | Underexpressed in FP versus FN |
| CHST6     | -1.836           | 1.843        | 0.021            | Underexpressed in FP versus FN |
| MAP1LC3C  | -1.776           | 0.274        | 0.025            | Underexpressed in FP versus FN |
| FZD6      | -1.442           | 2.019        | 0.020            | Underexpressed in FP versus FN |
| PLAC1     | -1.481           | -0.202       | 0.026            | Underexpressed in FP versus FN |
| FAM83H    | -1.101           | 3.287        | 0.016            | Underexpressed in FP versus FN |
| PDE7B     | -1.764           | 2.752        | 0.018            | Underexpressed in FP versus FN |
| LOC440028 | -1.712           | -0.172       | 0.026            | Underexpressed in FP versus FN |
| TSPAN11   | -1.077           | 4.471        | 0.013            | Underexpressed in FP versus FN |
| DUSP2     | -1.360           | 3.058        | 0.017            | Underexpressed in FP versus FN |

## Supplementary Table 10 (continued)

| Symbol       | Log2.Fold.Change | Log2.AveExpr | Adjusted.P.value | Category                       |
|--------------|------------------|--------------|------------------|--------------------------------|
| HAP1         | -1.988           | -1.180       | 0.028            | Underexpressed in FP versus FN |
| SOSTDC1      | -3.558           | 1.321        | 0.024            | Underexpressed in FP versus FN |
| PDZRN4       | -2.673           | 0.495        | 0.025            | Underexpressed in FP versus FN |
| GRIA4        | -2.493           | -0.053       | 0.026            | Underexpressed in FP versus FN |
| TSPAN8       | -2.233           | -0.859       | 0.028            | Underexpressed in FP versus FN |
| LOC100506178 | -1.838           | -1.896       | 0.029            | Underexpressed in FP versus FN |
| KCNIP3       | -1.406           | 2.639        | 0.018            | Underexpressed in FP versus FN |
| SLC6A13      | -1.468           | -0.025       | 0.026            | Underexpressed in FP versus FN |
| PDZK1IP1     | -2.315           | -5.035       | 0.032            | Underexpressed in FP versus FN |
| EGFLAM       | -1.041           | 2.934        | 0.017            | Underexpressed in FP versus FN |
| FGF19        | -2.538           | -5.025       | 0.032            | Underexpressed in FP versus FN |
| ZMAT1        | -1.363           | 2.465        | 0.019            | Underexpressed in FP versus FN |
| COCH         | -1.750           | 1.405        | 0.023            | Underexpressed in FP versus FN |
| ROR2         | -1.660           | 2.381        | 0.020            | Underexpressed in FP versus FN |
| KLHL14       | -3.080           | 1.203        | 0.025            | Underexpressed in FP versus FN |
| SAMD9L       | -1.318           | 3.963        | 0.015            | Underexpressed in FP versus FN |
| LOC440905    | -5.632           | 0.279        | 0.028            | Underexpressed in FP versus FN |
| MSR1         | -1.057           | 4.203        | 0.014            | Underexpressed in FP versus FN |
| EPHA3        | -1.628           | 4.468        | 0.014            | Underexpressed in FP versus FN |
| KLKB1        | -1.456           | -0.090       | 0.028            | Underexpressed in FP versus FN |
| KLHL4        | -1.684           | 0.711        | 0.026            | Underexpressed in FP versus FN |
| EGR1         | -1.234           | 8.030        | 0.014            | Underexpressed in FP versus FN |
| RHBDL3       | -1.474           | 0.064        | 0.027            | Underexpressed in FP versus FN |
| CAMKV        | -2.359           | -0.994       | 0.030            | Underexpressed in FP versus FN |
| EVA1A        | -1.122           | 1.698        | 0.023            | Underexpressed in FP versus FN |

## Supplementary Table 10 (continued)

| Symbol   | Log2.Fold.Change | Log2.AveExpr | Adjusted.P.value | Category                       |
|----------|------------------|--------------|------------------|--------------------------------|
| SOX2     | -2.910           | -1.654       | 0.031            | Underexpressed in FP versus FN |
| RFX2     | -1.024           | 2.798        | 0.019            | Underexpressed in FP versus FN |
| EHF      | -2.523           | -2.856       | 0.033            | Underexpressed in FP versus FN |
| DSC2     | -1.726           | 1.156        | 0.025            | Underexpressed in FP versus FN |
| NOD2     | -1.063           | 1.279        | 0.025            | Underexpressed in FP versus FN |
| PHEX     | -1.548           | -0.268       | 0.029            | Underexpressed in FP versus FN |
| GPR85    | -1.316           | 0.845        | 0.026            | Underexpressed in FP versus FN |
| SPRY4    | -1.313           | 6.942        | 0.013            | Underexpressed in FP versus FN |
| WNK2     | -1.162           | 3.382        | 0.017            | Underexpressed in FP versus FN |
| WDR17    | -1.993           | -0.502       | 0.030            | Underexpressed in FP versus FN |
| SULT4A1  | -2.038           | 1.526        | 0.025            | Underexpressed in FP versus FN |
| PLCB4    | -1.952           | 3.126        | 0.020            | Underexpressed in FP versus FN |
| FAM131B  | -1.274           | 0.316        | 0.028            | Underexpressed in FP versus FN |
| CEACAM1  | -1.626           | -0.650       | 0.031            | Underexpressed in FP versus FN |
| LYPD3    | -1.378           | 0.511        | 0.028            | Underexpressed in FP versus FN |
| STOX1    | -1.310           | 1.195        | 0.026            | Underexpressed in FP versus FN |
| STK32B   | -1.441           | 3.524        | 0.018            | Underexpressed in FP versus FN |
| SLC6A15  | -3.408           | -0.437       | 0.031            | Underexpressed in FP versus FN |
| TSPAN13  | -1.115           | 3.873        | 0.017            | Underexpressed in FP versus FN |
| TMEM184A | -1.848           | -0.412       | 0.032            | Underexpressed in FP versus FN |
| CA2      | -1.534           | 2.621        | 0.022            | Underexpressed in FP versus FN |
| SLFN11   | -1.256           | 3.982        | 0.017            | Underexpressed in FP versus FN |
| NRG2     | -1.589           | 0.342        | 0.030            | Underexpressed in FP versus FN |
| SLC5A9   | -1.279           | 0.565        | 0.029            | Underexpressed in FP versus FN |
| TNFSF13B | -1.132           | 2.475        | 0.022            | Underexpressed in FP versus FN |

## Supplementary Table 10 (continued)

| Symbol   | Log2.Fold.Change | Log2.AveExpr | Adjusted.P.value | Category                       |
|----------|------------------|--------------|------------------|--------------------------------|
| OGN      | -2.291           | 4.302        | 0.017            | Underexpressed in FP versus FN |
| MBP      | -1.244           | 4.210        | 0.016            | Underexpressed in FP versus FN |
| TACR3    | -2.186           | -2.771       | 0.036            | Underexpressed in FP versus FN |
| CHAD     | -1.271           | 0.824        | 0.029            | Underexpressed in FP versus FN |
| AMPH     | -1.735           | 2.370        | 0.024            | Underexpressed in FP versus FN |
| CHODL    | -2.209           | 2.841        | 0.023            | Underexpressed in FP versus FN |
| HRCT1    | -1.239           | -0.392       | 0.033            | Underexpressed in FP versus FN |
| TRHDE    | -2.545           | -0.778       | 0.035            | Underexpressed in FP versus FN |
| ZNF503   | -1.031           | 4.074        | 0.017            | Underexpressed in FP versus FN |
| TULP1    | -1.585           | -1.058       | 0.036            | Underexpressed in FP versus FN |
| ADH1C    | -1.798           | -0.865       | 0.036            | Underexpressed in FP versus FN |
| FAM129A  | -1.621           | 3.920        | 0.019            | Underexpressed in FP versus FN |
| ISL2     | -2.324           | -0.936       | 0.037            | Underexpressed in FP versus FN |
| HORMAD1  | -1.974           | -3.492       | 0.042            | Underexpressed in FP versus FN |
| PRICKLE2 | -1.043           | 3.852        | 0.019            | Underexpressed in FP versus FN |
| LRRK2    | -1.297           | 1.445        | 0.030            | Underexpressed in FP versus FN |
| TRIM71   | -2.383           | -1.776       | 0.040            | Underexpressed in FP versus FN |
| MDK      | -1.027           | 7.970        | 0.017            | Underexpressed in FP versus FN |
| GJB3     | -1.801           | -3.036       | 0.043            | Underexpressed in FP versus FN |
| SAMD3    | -1.342           | 0.234        | 0.035            | Underexpressed in FP versus FN |
| TFPI2    | -1.387           | 0.539        | 0.034            | Underexpressed in FP versus FN |
| RASL10B  | -1.116           | 3.164        | 0.023            | Underexpressed in FP versus FN |
| SLC38A4  | -1.643           | 1.340        | 0.031            | Underexpressed in FP versus FN |
| BBOX1    | -1.525           | -1.836       | 0.041            | Underexpressed in FP versus FN |
| HOXB2    | -1.590           | 3.359        | 0.023            | Underexpressed in FP versus FN |

## Supplementary Table 10 (continued)

| Symbol    | Log2.Fold.Change | Log2.AveExpr | Adjusted.P.value | Category                       |
|-----------|------------------|--------------|------------------|--------------------------------|
| CDHR4     | -1.724           | -3.685       | 0.045            | Underexpressed in FP versus FN |
| LAMC3     | -1.937           | 3.370        | 0.023            | Underexpressed in FP versus FN |
| RAG1      | -1.182           | 0.327        | 0.035            | Underexpressed in FP versus FN |
| SRCRB4D   | -1.239           | 1.098        | 0.033            | Underexpressed in FP versus FN |
| S100A8    | -1.854           | -0.097       | 0.038            | Underexpressed in FP versus FN |
| PFKFB2    | -1.041           | 2.880        | 0.024            | Underexpressed in FP versus FN |
| NPAS2     | -1.286           | 2.829        | 0.025            | Underexpressed in FP versus FN |
| LOC440173 | -2.419           | -0.142       | 0.038            | Underexpressed in FP versus FN |
| GPIHBP1   | -1.316           | 1.498        | 0.031            | Underexpressed in FP versus FN |
| CEACAM5   | -2.051           | -5.574       | 0.047            | Underexpressed in FP versus FN |
| XKR8      | -1.199           | 2.089        | 0.029            | Underexpressed in FP versus FN |
| ROR1      | -1.230           | 2.386        | 0.028            | Underexpressed in FP versus FN |
| TC2N      | -2.192           | 1.304        | 0.034            | Underexpressed in FP versus FN |
| SORCS2    | -1.012           | 4.757        | 0.017            | Underexpressed in FP versus FN |
| PALM3     | -1.604           | 1.199        | 0.034            | Underexpressed in FP versus FN |
| GPR88     | -1.636           | -1.145       | 0.042            | Underexpressed in FP versus FN |
| THSD7A    | -1.196           | 2.526        | 0.028            | Underexpressed in FP versus FN |
| HMX1      | -2.468           | -2.797       | 0.046            | Underexpressed in FP versus FN |
| SLC6A16   | -1.278           | 2.790        | 0.026            | Underexpressed in FP versus FN |
| PAG1      | -1.143           | 4.648        | 0.018            | Underexpressed in FP versus FN |
| GPC4      | -1.071           | 5.695        | 0.016            | Underexpressed in FP versus FN |
| DLX5      | -1.663           | -0.534       | 0.041            | Underexpressed in FP versus FN |
| SNCA      | -2.293           | 2.713        | 0.029            | Underexpressed in FP versus FN |
| RAP1GAP   | -1.087           | 3.085        | 0.025            | Underexpressed in FP versus FN |
| TNN       | -1.418           | 1.089        | 0.036            | Underexpressed in FP versus FN |

## Supplementary Table 10 (continued)

| Symbol    | Log2.Fold.Change | Log2.AveExpr | Adjusted.P.value | Category                       |
|-----------|------------------|--------------|------------------|--------------------------------|
| CACNG8    | -1.403           | 1.010        | 0.037            | Underexpressed in FP versus FN |
| OBSCN     | -1.146           | 6.705        | 0.017            | Underexpressed in FP versus FN |
| ATP1B2    | -1.152           | 1.725        | 0.033            | Underexpressed in FP versus FN |
| SLITRK4   | -2.239           | 2.142        | 0.033            | Underexpressed in FP versus FN |
| RNF207    | -1.140           | 3.435        | 0.024            | Underexpressed in FP versus FN |
| OLR1      | -1.348           | 1.616        | 0.034            | Underexpressed in FP versus FN |
| NIPAL2    | -1.234           | 1.134        | 0.036            | Underexpressed in FP versus FN |
| PCYT1B    | -1.399           | 2.133        | 0.032            | Underexpressed in FP versus FN |
| LAYN      | -1.097           | 2.799        | 0.028            | Underexpressed in FP versus FN |
| FAM124A   | -1.159           | 1.738        | 0.034            | Underexpressed in FP versus FN |
| OASL      | -1.647           | 1.037        | 0.038            | Underexpressed in FP versus FN |
| C11orf92  | -2.235           | -1.079       | 0.046            | Underexpressed in FP versus FN |
| TGFBR3    | -1.132           | 4.330        | 0.021            | Underexpressed in FP versus FN |
| GLDC      | -1.571           | -0.973       | 0.046            | Underexpressed in FP versus FN |
| KIAA1644  | -1.893           | 1.435        | 0.037            | Underexpressed in FP versus FN |
| SIGLEC1   | -1.167           | 4.249        | 0.021            | Underexpressed in FP versus FN |
| LINC00312 | -1.016           | 2.567        | 0.030            | Underexpressed in FP versus FN |
| HOXD8     | -1.327           | 3.241        | 0.027            | Underexpressed in FP versus FN |
| ALX1      | -2.834           | -0.553       | 0.046            | Underexpressed in FP versus FN |
| FRS2      | -1.363           | 5.807        | 0.018            | Underexpressed in FP versus FN |
| FPR1      | -1.352           | 0.880        | 0.040            | Underexpressed in FP versus FN |
| SERPINA1  | -1.368           | 2.215        | 0.033            | Underexpressed in FP versus FN |
| FAM124B   | -1.069           | 0.284        | 0.043            | Underexpressed in FP versus FN |
| TNFSF8    | -1.374           | 0.718        | 0.041            | Underexpressed in FP versus FN |
| PRR16     | -1.308           | 1.356        | 0.038            | Underexpressed in FP versus FN |

### Supplementary Table 10 (continued)

| Symbol       | Log2.Fold.Change | Log2.AveExpr | Adjusted.P.value | Category                       |
|--------------|------------------|--------------|------------------|--------------------------------|
| GPR63        | -1.666           | 1.606        | 0.037            | Underexpressed in FP versus FN |
| TTYH1        | -1.156           | -0.162       | 0.045            | Underexpressed in FP versus FN |
| ADAMTS19     | -2.314           | -1.046       | 0.049            | Underexpressed in FP versus FN |
| SCN3B        | -1.492           | 5.704        | 0.019            | Underexpressed in FP versus FN |
| CXorf57      | -2.252           | 2.257        | 0.035            | Underexpressed in FP versus FN |
| APOBEC3F     | -1.319           | 1.162        | 0.041            | Underexpressed in FP versus FN |
| HIST1H2BK    | -1.224           | 3.129        | 0.029            | Underexpressed in FP versus FN |
| TFPI         | -1.109           | 4.370        | 0.023            | Underexpressed in FP versus FN |
| DOK5         | -1.271           | 0.637        | 0.044            | Underexpressed in FP versus FN |
| OLFM4        | -1.164           | 0.600        | 0.044            | Underexpressed in FP versus FN |
| HPDL         | -1.253           | 0.927        | 0.043            | Underexpressed in FP versus FN |
| DYNC111      | -2.239           | 2.501        | 0.035            | Underexpressed in FP versus FN |
| PLEKHA6      | -1.135           | 4.481        | 0.023            | Underexpressed in FP versus FN |
| COL4A5       | -1.740           | 4.319        | 0.025            | Underexpressed in FP versus FN |
| C3orf72      | -2.527           | 0.215        | 0.048            | Underexpressed in FP versus FN |
| FST          | -1.796           | 3.301        | 0.031            | Underexpressed in FP versus FN |
| DIO3         | -1.776           | 1.436        | 0.043            | Underexpressed in FP versus FN |
| SLC9A3R1     | -1.221           | 3.259        | 0.030            | Underexpressed in FP versus FN |
| CEBPD        | -1.221           | 5.187        | 0.022            | Underexpressed in FP versus FN |
| SLC4A8       | -1.484           | 0.900        | 0.046            | Underexpressed in FP versus FN |
| IGF2BP3      | -1.612           | 5.193        | 0.022            | Underexpressed in FP versus FN |
| CYP2W1       | -1.519           | 0.684        | 0.047            | Underexpressed in FP versus FN |
| SP9          | -1.410           | 0.658        | 0.048            | Underexpressed in FP versus FN |
| LOC100505702 | -1.072           | 0.756        | 0.047            | Underexpressed in FP versus FN |
| IGF1         | -1.483           | 3.766        | 0.029            | Underexpressed in FP versus FN |

## Supplementary Table 10 (continued)

| Symbol    | Log2.Fold.Change | Log2.AveExpr | Adjusted.P.value | Category                       |
|-----------|------------------|--------------|------------------|--------------------------------|
| MECOM     | -1.063           | 2.640        | 0.036            | Underexpressed in FP versus FN |
| TM6SF2    | -1.089           | 1.798        | 0.042            | Underexpressed in FP versus FN |
| COL9A1    | -1.467           | 3.909        | 0.029            | Underexpressed in FP versus FN |
| SP140L    | -1.050           | 2.281        | 0.039            | Underexpressed in FP versus FN |
| ALDH1A1   | -1.470           | 3.084        | 0.034            | Underexpressed in FP versus FN |
| SLC41A2   | -1.017           | 1.038        | 0.048            | Underexpressed in FP versus FN |
| KIAA1211L | -1.016           | 2.500        | 0.039            | Underexpressed in FP versus FN |
| KIAA1244  | -1.927           | 1.418        | 0.049            | Underexpressed in FP versus FN |
| EPHA4     | -1.407           | 3.973        | 0.030            | Underexpressed in FP versus FN |
| KCNJ2     | -1.111           | 2.255        | 0.042            | Underexpressed in FP versus FN |
| C21orf7   | -1.238           | 3.827        | 0.031            | Underexpressed in FP versus FN |
| HMGA1     | -1.028           | 5.840        | 0.024            | Underexpressed in FP versus FN |
| P2RY1     | -1.147           | 1.420        | 0.049            | Underexpressed in FP versus FN |
| BST2      | -1.243           | 4.668        | 0.028            | Underexpressed in FP versus FN |
| ALPK2     | -1.485           | 3.820        | 0.033            | Underexpressed in FP versus FN |
| CELSR1    | -1.212           | 3.308        | 0.035            | Underexpressed in FP versus FN |
| SLC11A1   | -1.039           | 1.937        | 0.047            | Underexpressed in FP versus FN |
| SMOC2     | -1.107           | 5.418        | 0.025            | Underexpressed in FP versus FN |
| COLEC11   | -1.029           | 1.719        | 0.050            | Underexpressed in FP versus FN |
| ADAM28    | -1.066           | 2.523        | 0.043            | Underexpressed in FP versus FN |
| GPR64     | -1.712           | 2.509        | 0.045            | Underexpressed in FP versus FN |
| PRRT4     | -1.108           | 4.247        | 0.031            | Underexpressed in FP versus FN |
| AFF3      | -1.196           | 4.312        | 0.031            | Underexpressed in FP versus FN |
| KIAA1377  | -1.046           | 2.102        | 0.048            | Underexpressed in FP versus FN |
| LRRN3     | -1.355           | 2.735        | 0.044            | Underexpressed in FP versus FN |



### Supplementary Table 10 (continued)

| Symbol     | Log2.Fold.Change | Log2.AveExpr | Adjusted.P.value | Category                       |
|------------|------------------|--------------|------------------|--------------------------------|
| SIX2       | -1.255           | 5.180        | 0.028            | Underexpressed in FP versus FN |
| LRRC17     | -1.266           | 3.938        | 0.035            | Underexpressed in FP versus FN |
| ALS2CL     | -1.261           | 3.215        | 0.041            | Underexpressed in FP versus FN |
| ZDHHC2     | -1.258           | 3.046        | 0.043            | Underexpressed in FP versus FN |
| DTNA       | -1.191           | 3.324        | 0.041            | Underexpressed in FP versus FN |
| OSMR       | -1.089           | 3.580        | 0.041            | Underexpressed in FP versus FN |
| HHIP       | -1.512           | 2.793        | 0.049            | Underexpressed in FP versus FN |
| CREB3L1    | -1.257           | 4.076        | 0.038            | Underexpressed in FP versus FN |
| FIBIN      | -1.293           | 3.903        | 0.040            | Underexpressed in FP versus FN |
| SLC38A5    | -1.277           | 4.129        | 0.038            | Underexpressed in FP versus FN |
| PRKXP1     | -1.110           | 3.007        | 0.048            | Underexpressed in FP versus FN |
| ST6GALNAC5 | -1.470           | 4.129        | 0.041            | Underexpressed in FP versus FN |
| STEAP4     | -1.210           | 3.227        | 0.049            | Underexpressed in FP versus FN |
| SCARA3     | -1.691           | 3.909        | 0.047            | Underexpressed in FP versus FN |
| COL2A1     | -1.314           | 6.376        | 0.038            | Underexpressed in FP versus FN |
| PROM1      | -1.236           | 6.005        | 0.041            | Underexpressed in FP versus FN |
| PCOLCE     | -1.030           | 6.223        | 0.042            | Underexpressed in FP versus FN |
| ELN        | -1.252           | 6.753        | 0.049            | Underexpressed in FP versus FN |
