# Supplementary material
Source: PubMed Central journal article supplement (PMC7415348)
Supplement: NIHMS1610503-supplement-Supplementary_Table_11.pdf [file NIHMS1610503-supplement-Supplementary_Table_11.pdf]

**Supplementary Table 11. Expression status of promoter hypo- or hypermethylated genes with and without PAX3-FOXO1 binding sites**

|                                               | Hypomethylated          |                     |                            | Hypermethylated      |                  |                            |
|-----------------------------------------------|-------------------------|---------------------|----------------------------|----------------------|------------------|----------------------------|
|                                               | Overexpressed           | Underexpressed      | No differential expression | Overexpressed        | Underexpressed   | No differential expression |
| <b>Genes with PAX3-FOXO1 binding sites</b>    | 25 (29.4%) <sup>a</sup> | 5 (5.4%)            | 16 (5.0%)                  | 10 (20%)             | 8 (9.9%)         | 20 (9.4%)                  |
| <b>Genes without PAX3-FOXO1 binding sites</b> | 60                      | 88                  | 307                        | 40                   | 73               | 193                        |
|                                               | P<0.01 <sup>b</sup>     | P=0.79 <sup>b</sup> |                            | P=0.046 <sup>c</sup> | P=1 <sup>c</sup> |                            |

<sup>a</sup>denotes number of genes with PAX3-FOXO1 binding sites, and corresponding percentile fraction among genes with or without PAX3-FOXO1 binding sites.

<sup>b,c</sup>Fisher's exact test was performed by using non-differentially expressed genes that are hypomethylated and hypermethylated as a reference group, respectively.
